# Supplementary material for: The Landscape of Using Glycosyltransferase Gene Signatures for Overall Survival Prediction in Hepatocellular Carcinoma
Source: Hindawi journal article supplement (doi:10.1155/2022/5989419), 2022-06-21
Supplement: f1 [file 5989419.f1.zip]

| ID       | Descriptio | setSize | enrichment | NES       | pvalue    | p.adjust  | qvalues   |
|----------|------------|---------|------------|-----------|-----------|-----------|-----------|
| hsa05165 | Human papi | 321     | 0.4535176  | 1.5168867 | 0.001001  | 0.0102477 | 0.0054098 |
| hsa05016 | Huntingtor | 269     | 0.4404965  | 1.4626777 | 0.001006  | 0.0102477 | 0.0054098 |
| hsa05131 | Shigellosi | 212     | 0.4757418  | 1.5658992 | 0.001007  | 0.0102477 | 0.0054098 |
| hsa05132 | Salmonella | 212     | 0.479945   | 1.579734  | 0.001007  | 0.0102477 | 0.0054098 |
| hsa05020 | Prion dise | 240     | 0.4396212  | 1.4531522 | 0.0010081 | 0.0102477 | 0.0054098 |
| hsa05166 | Human T-ce | 215     | 0.5028772  | 1.6542871 | 0.0010081 | 0.0102477 | 0.0054098 |
| hsa04144 | Endocytosi | 233     | 0.4833499  | 1.5943948 | 0.0010091 | 0.0102477 | 0.0054098 |
| hsa04810 | Regulator  | 209     | 0.4567972  | 1.5006145 | 0.0010091 | 0.0102477 | 0.0054098 |
| hsa05170 | Human immu | 198     | 0.4541426  | 1.4872467 | 0.0010111 | 0.0102477 | 0.0054098 |
| hsa05169 | Epstein-Ba | 192     | 0.5056904  | 1.6547689 | 0.0010121 | 0.0102477 | 0.0054098 |
| hsa05130 | Pathogenic | 182     | 0.4960999  | 1.616796  | 0.0010132 | 0.0102477 | 0.0054098 |
| hsa04621 | NOD-like r | 167     | 0.4721422  | 1.5300177 | 0.0010194 | 0.0102477 | 0.0054098 |
| hsa05152 | Tuberculos | 168     | 0.5362255  | 1.7376987 | 0.0010194 | 0.0102477 | 0.0054098 |
| hsa05203 | Viral carc | 161     | 0.4844461  | 1.5674392 | 0.0010235 | 0.0102477 | 0.0054098 |
| hsa04218 | Cellular s | 153     | 0.489643   | 1.5808431 | 0.0010246 | 0.0102477 | 0.0054098 |
| hsa05164 | Influenza  | 158     | 0.4596661  | 1.487073  | 0.0010246 | 0.0102477 | 0.0054098 |
| hsa05206 | MicroRNAs  | 158     | 0.5086495  | 1.6455401 | 0.0010246 | 0.0102477 | 0.0054098 |
| hsa03013 | RNA transp | 152     | 0.4779992  | 1.5435713 | 0.0010256 | 0.0102477 | 0.0054098 |
| hsa04145 | Phagosome  | 145     | 0.6062024  | 1.9532161 | 0.0010256 | 0.0102477 | 0.0054098 |
| hsa03040 | Spliceosom | 132     | 0.5179121  | 1.6556848 | 0.0010406 | 0.0102477 | 0.0054098 |
| hsa04110 | Cell cycle | 123     | 0.6030942  | 1.9167031 | 0.0010406 | 0.0102477 | 0.0054098 |
| hsa03010 | Ribosome   | 127     | 0.5559621  | 1.7708309 | 0.0010417 | 0.0102477 | 0.0054098 |
| hsa04380 | Osteoclast | 122     | 0.5291945  | 1.6810332 | 0.0010417 | 0.0102477 | 0.0054098 |
| hsa04142 | Lysosome   | 128     | 0.5245409  | 1.6687912 | 0.0010449 | 0.0102477 | 0.0054098 |
| hsa04512 | ECM-recept | 86      | 0.5554744  | 1.706101  | 0.0010684 | 0.0102477 | 0.0054098 |
| hsa05323 | Rheumatoic | 88      | 0.6431027  | 1.9764459 | 0.0010695 | 0.0102477 | 0.0054098 |
| hsa04666 | Fc gamma F | 87      | 0.5544505  | 1.7004796 | 0.001073  | 0.0102477 | 0.0054098 |
| hsa03008 | Ribosome b | 71      | 0.5534781  | 1.6709042 | 0.0010834 | 0.0102477 | 0.0054098 |
| hsa05140 | Leishmania | 71      | 0.6154584  | 1.8580177 | 0.0010834 | 0.0102477 | 0.0054098 |
| hsa04612 | Antigen pr | 65      | 0.5894278  | 1.762247  | 0.0010893 | 0.0102477 | 0.0054098 |
| hsa05100 | Bacterial  | 65      | 0.5467699  | 1.6347101 | 0.0010893 | 0.0102477 | 0.0054098 |
| hsa03460 | Fanconi ar | 48      | 0.5505983  | 1.585471  | 0.0011236 | 0.0102477 | 0.0054098 |
| hsa04672 | Intestinal | 45      | 0.5937936  | 1.6978776 | 0.0011261 | 0.0102477 | 0.0054098 |
| hsa05320 | Autoimmune | 45      | 0.5664258  | 1.6196231 | 0.0011261 | 0.0102477 | 0.0054098 |
| hsa04940 | Type I dia | 41      | 0.5848803  | 1.6441119 | 0.0011494 | 0.0102477 | 0.0054098 |
| hsa05219 | Bladder ca | 41      | 0.6465432  | 1.8174476 | 0.0011494 | 0.0102477 | 0.0054098 |
| hsa03030 | DNA replic | 36      | 0.655346   | 1.7971769 | 0.0011587 | 0.0102477 | 0.0054098 |
| hsa05310 | Asthma     | 28      | 0.693903   | 1.8476145 | 0.0011765 | 0.0102477 | 0.0054098 |
| hsa05200 | Pathways i | 516     | 0.3894626  | 1.3218613 | 0.001998  | 0.0147347 | 0.0077785 |
| hsa05010 | Alzheimer  | 332     | 0.4097425  | 1.3726759 | 0.002002  | 0.0147347 | 0.0077785 |
| hsa05014 | Amyotrophi | 327     | 0.4074267  | 1.3630543 | 0.002004  | 0.0147347 | 0.0077785 |
| hsa04060 | Cytokine-c | 282     | 0.4042104  | 1.3434671 | 0.0020101 | 0.0147347 | 0.0077785 |
| hsa05012 | Parkinson  | 214     | 0.4258017  | 1.4006152 | 0.0020182 | 0.0147347 | 0.0077785 |
| hsa04668 | TNF signal | 111     | 0.4872861  | 1.5355801 | 0.0020921 | 0.0147347 | 0.0077785 |
| hsa05145 | Toxoplasma | 108     | 0.4948755  | 1.5555628 | 0.0020964 | 0.0147347 | 0.0077785 |
| hsa04658 | Th1 and Th | 90      | 0.5134139  | 1.5834196 | 0.0021299 | 0.0147347 | 0.0077785 |
| hsa04657 | IL-17 sigr | 93      | 0.5235706  | 1.6220295 | 0.0021322 | 0.0147347 | 0.0077785 |
| hsa04640 | Hematopoie | 92      | 0.5200986  | 1.6056066 | 0.0021368 | 0.0147347 | 0.0077785 |
| hsa03050 | Proteasome | 44      | 0.5568883  | 1.5869139 | 0.0022624 | 0.015283  | 0.008068  |
| hsa03440 | Homologous | 37      | 0.5646549  | 1.5551169 | 0.0023202 | 0.0153596 | 0.0081084 |

|          |                          |     |           |           |           |           |           |
|----------|--------------------------|-----|-----------|-----------|-----------|-----------|-----------|
| hsa05163 | Human cytochrome         | 212 | 0.433618  | 1.427249  | 0.0030211 | 0.0189634 | 0.0100109 |
| hsa04015 | Rap1 signaling           | 207 | 0.4326736 | 1.4197072 | 0.0030303 | 0.0189634 | 0.0100109 |
| hsa04062 | Chemokine                | 189 | 0.4439228 | 1.4521324 | 0.0030364 | 0.0189634 | 0.0100109 |
| hsa04933 | AGE-RAGE signaling       | 99  | 0.4951643 | 1.5477114 | 0.0031546 | 0.0193364 | 0.0102078 |
| hsa00232 | Caffeine metabolism      | 5   | -0.952029 | -1.882854 | 0.0037594 | 0.0226247 | 0.0119437 |
| hsa04510 | Focal adhesion           | 197 | 0.4361227 | 1.4274144 | 0.0040445 | 0.0233386 | 0.0123206 |
| hsa04141 | Protein processing       | 163 | 0.4516493 | 1.4620669 | 0.0040858 | 0.0233386 | 0.0123206 |
| hsa00072 | Synthesis                | 10  | -0.811109 | -2.051631 | 0.0041322 | 0.0233386 | 0.0123206 |
| hsa05135 | Yersinia infection       | 125 | 0.4638739 | 1.4738078 | 0.0041797 | 0.0233386 | 0.0123206 |
| hsa05120 | Epithelial               | 69  | 0.5148075 | 1.5571464 | 0.0043011 | 0.0233386 | 0.0123206 |
| hsa05230 | Central carbon           | 69  | 0.5144033 | 1.5559238 | 0.0043011 | 0.0233386 | 0.0123206 |
| hsa05416 | Viral myocytolysis       | 57  | 0.5256095 | 1.5498304 | 0.0044248 | 0.0236226 | 0.0124705 |
| hsa05332 | Graft-versus             | 36  | 0.573052  | 1.5714994 | 0.004635  | 0.0243521 | 0.0128556 |
| hsa05162 | Measles                  | 132 | 0.4554392 | 1.4559685 | 0.0052029 | 0.0267047 | 0.0140976 |
| hsa00120 | Primary biliary          | 17  | -0.904342 | -2.607291 | 0.0053191 | 0.0267047 | 0.0140976 |
| hsa04620 | Toll-like                | 95  | 0.4829092 | 1.4992889 | 0.0053248 | 0.0267047 | 0.0140976 |
| hsa00220 | Arginine biosynthesis    | 21  | -0.810452 | -2.507095 | 0.0054645 | 0.0267453 | 0.0141119 |
| hsa00053 | Ascorbate                | 19  | -0.707744 | -2.120635 | 0.0054945 | 0.0267453 | 0.0141119 |
| hsa00340 | Histidine                | 22  | -0.821071 | -2.594334 | 0.005618  | 0.02695   | 0.0142271 |
| hsa00040 | Pentose                  | 24  | -0.517127 | -1.672129 | 0.005848  | 0.0276525 | 0.0145979 |
| hsa00591 | Linoleic acid            | 25  | -0.773121 | -2.487519 | 0.0059524 | 0.0277498 | 0.0146493 |
| hsa00650 | Butanoate                | 26  | -0.805173 | -2.627552 | 0.006135  | 0.0278175 | 0.014685  |
| hsa04950 | Maturity onset           | 26  | -0.516514 | -1.685561 | 0.006135  | 0.0278175 | 0.014685  |
| hsa00410 | beta-Alanine             | 29  | -0.720841 | -2.388366 | 0.0067114 | 0.0282809 | 0.0149297 |
| hsa00630 | Glyoxylate               | 29  | -0.692604 | -2.29481  | 0.0067114 | 0.0282809 | 0.0149297 |
| hsa00250 | Alanine, aspartate       | 34  | -0.544471 | -1.879822 | 0.0068493 | 0.0282809 | 0.0149297 |
| hsa00020 | Citrate cycle            | 30  | -0.470949 | -1.57461  | 0.0068966 | 0.0282809 | 0.0149297 |
| hsa05340 | Primary immunodeficiency | 34  | 0.5583156 | 1.5179755 | 0.0070093 | 0.0282809 | 0.0149297 |
| hsa00640 | Propanoate               | 33  | -0.697913 | -2.365583 | 0.0070423 | 0.0282809 | 0.0149297 |
| hsa00760 | Nicotinate               | 33  | -0.440816 | -1.49415  | 0.0070423 | 0.0282809 | 0.0149297 |
| hsa00860 | Porphyrin                | 33  | -0.441138 | -1.495241 | 0.0070423 | 0.0282809 | 0.0149297 |
| hsa00350 | Tyrosine metabolism      | 36  | -0.764205 | -2.665297 | 0.0071942 | 0.0282809 | 0.0149297 |
| hsa04625 | C-type lectin            | 102 | 0.4637085 | 1.4536796 | 0.0073222 | 0.0282809 | 0.0149297 |
| hsa00260 | Glycine, serine          | 38  | -0.812756 | -2.8379   | 0.0074074 | 0.0282809 | 0.0149297 |
| hsa00620 | Pyruvate                 | 38  | -0.547086 | -1.910261 | 0.0074074 | 0.0282809 | 0.0149297 |
| hsa00380 | Tryptophan               | 42  | -0.789632 | -2.851053 | 0.0074627 | 0.0282809 | 0.0149297 |
| hsa04975 | Fat digestion            | 42  | -0.545201 | -1.968511 | 0.0074627 | 0.0282809 | 0.0149297 |
| hsa00071 | Fatty acid               | 43  | -0.860306 | -3.151222 | 0.0075188 | 0.0282809 | 0.0149297 |
| hsa04914 | Progesterone             | 91  | 0.4628383 | 1.4273774 | 0.0085562 | 0.0310216 | 0.0163765 |
| hsa00270 | Cysteine                 | 49  | -0.507322 | -1.896175 | 0.0086957 | 0.0310216 | 0.0163765 |
| hsa00140 | Steroid hormone          | 51  | -0.737302 | -2.763698 | 0.0088496 | 0.0310216 | 0.0163765 |
| hsa00830 | Retinol metabolism       | 52  | -0.836335 | -3.151115 | 0.0088496 | 0.0310216 | 0.0163765 |
| hsa04979 | Cholesterol              | 50  | -0.556904 | -2.086402 | 0.0088496 | 0.0310216 | 0.0163765 |
| hsa00330 | Arginine                 | 48  | -0.502682 | -1.853957 | 0.0089286 | 0.0310216 | 0.0163765 |
| hsa04623 | Cytosolic                | 53  | 0.524409  | 1.5277511 | 0.0089586 | 0.0310216 | 0.0163765 |
| hsa05110 | Vibrio cholerae          | 49  | 0.52018   | 1.4935103 | 0.0090192 | 0.0310216 | 0.0163765 |
| hsa00280 | Valine, leucine          | 47  | -0.75276  | -2.758385 | 0.0090909 | 0.0310216 | 0.0163765 |
| hsa04064 | NF-kappa B               | 99  | 0.4607527 | 1.4401526 | 0.0094637 | 0.0317415 | 0.0167565 |
| hsa04061 | Viral protein            | 97  | 0.4650014 | 1.4485724 | 0.0094937 | 0.0317415 | 0.0167565 |
| hsa05150 | Staphylococcus           | 84  | 0.4758035 | 1.4592894 | 0.009636  | 0.0318951 | 0.0168376 |
| hsa05205 | Proteoglycan             | 198 | 0.4209615 | 1.3785838 | 0.0101112 | 0.0327918 | 0.017311  |

|          |            |     |           |           |           |           |           |
|----------|------------|-----|-----------|-----------|-----------|-----------|-----------|
| hsa00590 | Arachidoni | 56  | -0.48698  | -1.834197 | 0.0102041 | 0.0327918 | 0.017311  |
| hsa01212 | Fatty acid | 56  | -0.538917 | -2.029814 | 0.0102041 | 0.0327918 | 0.017311  |
| hsa00982 | Drug metab | 58  | -0.806647 | -3.093366 | 0.0103093 | 0.0328031 | 0.017317  |
| hsa04650 | Natural ki | 114 | 0.450367  | 1.424513  | 0.0104058 | 0.0328031 | 0.017317  |
| hsa00360 | Phenylalar | 17  | -0.66264  | -1.910445 | 0.0106383 | 0.0332196 | 0.0175368 |
| hsa05321 | Inflammatc | 63  | 0.4983318 | 1.4835685 | 0.0109529 | 0.0336793 | 0.0177795 |
| hsa00310 | Lysine deg | 60  | -0.425712 | -1.643743 | 0.010989  | 0.0336793 | 0.0177795 |
| hsa00980 | Metabolism | 64  | -0.760185 | -2.972792 | 0.0114943 | 0.0349046 | 0.0184263 |
| hsa00010 | Glycolysis | 65  | -0.477323 | -1.878179 | 0.0119048 | 0.0357318 | 0.018863  |
| hsa05211 | Renal cell | 66  | 0.4888732 | 1.4653312 | 0.0119826 | 0.0357318 | 0.018863  |
| hsa05204 | Chemical c | 67  | -0.794663 | -3.129247 | 0.0121951 | 0.0360409 | 0.0190262 |
| hsa04114 | Oocyte mei | 118 | 0.4516066 | 1.4317428 | 0.012487  | 0.0365769 | 0.0193092 |
| hsa00983 | Drug metab | 68  | -0.522893 | -2.056139 | 0.0126582 | 0.0367533 | 0.0194023 |
| hsa04664 | Fc epsilon | 65  | 0.4921575 | 1.4714322 | 0.0130719 | 0.0375454 | 0.0198204 |
| hsa03320 | PPAR signa | 75  | -0.685438 | -2.73843  | 0.0131579 | 0.0375454 | 0.0198204 |
| hsa01230 | Biosynthes | 69  | -0.397162 | -1.543291 | 0.0138889 | 0.0386321 | 0.0203941 |
| hsa03015 | mRNA surve | 92  | 0.4575021 | 1.4123635 | 0.0138889 | 0.0386321 | 0.0203941 |
| hsa04920 | Adipocytok | 69  | -0.436383 | -1.695697 | 0.0138889 | 0.0386321 | 0.0203941 |
| hsa04659 | Th17 cell  | 104 | 0.4479328 | 1.4060178 | 0.0146597 | 0.0404363 | 0.0213466 |
| hsa04976 | Bile secre | 82  | -0.61826  | -2.489994 | 0.0149254 | 0.0404448 | 0.021351  |
| hsa04540 | Gap juncti | 84  | 0.4671779 | 1.4328346 | 0.0149893 | 0.0404448 | 0.021351  |
| hsa02010 | ABC transp | 43  | -0.433901 | -1.589341 | 0.0150376 | 0.0404448 | 0.021351  |
| hsa04146 | Peroxisome | 81  | -0.653444 | -2.622469 | 0.0151515 | 0.0404448 | 0.021351  |
| hsa05202 | Transcript | 167 | 0.423414  | 1.3721098 | 0.0152905 | 0.0404893 | 0.0213745 |
| hsa04514 | Cell adhes | 138 | 0.4333077 | 1.3911269 | 0.0155119 | 0.0407495 | 0.0215119 |
| hsa04670 | Leukocyte  | 109 | 0.4449478 | 1.4001649 | 0.0157068 | 0.0409366 | 0.0216107 |
| hsa04610 | Complement | 83  | -0.690815 | -2.769248 | 0.015873  | 0.0410466 | 0.0216688 |
| hsa04260 | Cardiac mu | 80  | 0.4625944 | 1.4134818 | 0.01606   | 0.0412081 | 0.021754  |
| hsa05330 | Allograft  | 35  | 0.5370848 | 1.469554  | 0.0162791 | 0.041449  | 0.0218812 |
| hsa04151 | PI3K-Akt s | 344 | 0.3751756 | 1.2584184 | 0.0180361 | 0.0453411 | 0.0239358 |
| hsa05222 | Small cell | 92  | 0.4509947 | 1.3922744 | 0.0181624 | 0.0453411 | 0.0239358 |
| hsa05167 | Kaposi sar | 185 | 0.4085907 | 1.3343302 | 0.0182186 | 0.0453411 | 0.0239358 |
| hsa05161 | Hepatitis  | 156 | 0.4176635 | 1.350271  | 0.0184615 | 0.0456028 | 0.024074  |
| hsa00520 | Amino suga | 46  | 0.5129374 | 1.4715624 | 0.0191226 | 0.0468858 | 0.0247513 |
| hsa04217 | Necroptosi | 124 | 0.428601  | 1.3626916 | 0.0198123 | 0.0482197 | 0.0254554 |
| hsa04931 | Insulin re | 105 | -0.400815 | -1.736655 | 0.0212766 | 0.0510902 | 0.0269708 |
| hsa00600 | Sphingolip | 47  | 0.5046469 | 1.4527467 | 0.0213004 | 0.0510902 | 0.0269708 |
| hsa04390 | Hippo sigr | 153 | 0.4156388 | 1.3419161 | 0.0215164 | 0.0512369 | 0.0270482 |
| hsa04922 | Glucagon s | 102 | -0.401346 | -1.707105 | 0.0217391 | 0.0513975 | 0.0271331 |
| hsa04926 | Relaxin si | 128 | 0.4229212 | 1.3454949 | 0.0219436 | 0.0515129 | 0.027194  |
| hsa04961 | Endocrine  | 53  | 0.4940943 | 1.4394356 | 0.0223964 | 0.0522057 | 0.0275597 |
| hsa04066 | HIF-1 sigr | 105 | 0.4368019 | 1.3718093 | 0.0230366 | 0.0533226 | 0.0281493 |
| hsa03430 | Mismatch r | 22  | 0.5815784 | 1.4663912 | 0.0242718 | 0.055677  | 0.0293922 |
| hsa01200 | Carbon met | 114 | -0.405064 | -1.756154 | 0.0243902 | 0.055677  | 0.0293922 |
| hsa04120 | Ubiquitin  | 132 | 0.4190255 | 1.3395596 | 0.024974  | 0.0566191 | 0.0298896 |
| hsa04152 | AMPK signa | 119 | -0.316338 | -1.343334 | 0.0263158 | 0.0592553 | 0.0312812 |
| hsa00770 | Pantothena | 20  | -0.542418 | -1.660635 | 0.0265957 | 0.059481  | 0.0314004 |
| hsa04210 | Apoptosis  | 134 | 0.4168494 | 1.3338149 | 0.026999  | 0.0599776 | 0.0316625 |
| hsa00500 | Starch and | 30  | -0.443917 | -1.484229 | 0.0275862 | 0.0608736 | 0.0321355 |
| hsa04923 | Regulator  | 54  | -0.397144 | -1.503375 | 0.0277778 | 0.0608904 | 0.0321444 |
| hsa00561 | Glycerolip | 58  | -0.363224 | -1.392908 | 0.0309278 | 0.0673494 | 0.0355542 |

|          |            |     |           |           |           |           |           |
|----------|------------|-----|-----------|-----------|-----------|-----------|-----------|
| hsa04330 | Notch sigr | 52  | 0.4814323 | 1.3951404 | 0.0326209 | 0.0705721 | 0.0372554 |
| hsa04974 | Protein di | 99  | 0.4298129 | 1.3434458 | 0.0336488 | 0.0723231 | 0.0381798 |
| hsa04115 | p53 signal | 72  | 0.4525861 | 1.3664272 | 0.0346696 | 0.0740363 | 0.0390842 |
| hsa04915 | Estrogen s | 133 | 0.4063425 | 1.3002431 | 0.0353063 | 0.0749128 | 0.0395469 |
| hsa01210 | 2-Oxocarbo | 18  | -0.54227  | -1.595333 | 0.0378378 | 0.0797728 | 0.0421125 |
| hsa05133 | Pertussis  | 73  | 0.4446337 | 1.3450983 | 0.0389189 | 0.0815327 | 0.0430416 |
| hsa00601 | Glycosphir | 26  | 0.5378422 | 1.4071277 | 0.0417163 | 0.0865679 | 0.0456997 |
| hsa05235 | PD-L1 expr | 87  | 0.4347953 | 1.3335014 | 0.0418455 | 0.0865679 | 0.0456997 |
| hsa00061 | Fatty acid | 17  | -0.54679  | -1.576441 | 0.0425532 | 0.0869451 | 0.0458988 |
| hsa00430 | Taurine ar | 9   | -0.679078 | -1.660291 | 0.0425532 | 0.0869451 | 0.0458988 |
| hsa05168 | Herpes sin | 452 | 0.3466833 | 1.1736636 | 0.045045  | 0.0914718 | 0.0482885 |
| hsa04137 | Mitophagy  | 64  | 0.4483534 | 1.3367962 | 0.0469945 | 0.0948487 | 0.0500712 |
| hsa04071 | Sphingolip | 114 | 0.4088892 | 1.2933187 | 0.0489074 | 0.0981112 | 0.0517935 |

| rank | leading_eccore_enricgeneSymbol                                        |
|------|-----------------------------------------------------------------------|
| 4207 | tags=36%, 6696/5315/SPP1/PKM/E2F1/COL1A1/IKBKE/BAK1/ITGA3/CCNA2/CCNE1 |
| 5288 | tags=45%, 2877/8479GPX2/TUBA1C/NDUFA4L2/TUBA4A/COX7B2/TUBA1B/TUBA3C/  |
| 4847 | tags=45%, 80201/291CHKDC1/PYCARD/CXCL8/PFN2/ARPC1B/ITPR3/MAPK12/MAPK1 |
| 5388 | tags=48%, 29108/2364PYCARD/LY96/CXCL8/ANXA2/PFN2/ARPC1B/BAK1/MAPK12/M |
| 5344 | tags=48%, 1535/8479CYBA/TUBA1C/NCF2/NDUFA4L2/TUBA4A/COX7B2/ITPR3/MAP  |
| 5351 | tags=52%, 991/4316/9CDC20/MMP7/PTTG1/CCNB2/SLC2A1/E2F1/IL2RG/ICAM1/BU |
| 6921 | tags=64%, 10095/3561ARPC1B/IL2RG/DAB2/SRC/DNM1/FOLR1/CYTH4/RAB31/HRAS |
| 3797 | tags=35%, 3984/5217/LIMK1/PFN2/ARPC1B/ITGA3/ITGB4/RAC2/LPAR2/ENAH/SRC |
| 5851 | tags=47%, 10053/891/AP1M2/CCNB1/CCNB2/LIMK1/CDK1/BAK1/ITPR3/MAPK12/RA |
| 5143 | tags=52%, 1869/9641/E2F1/IKBKE/BAK1/ICAM1/CCNA2/CCNE1/MAPK12/CD3D/MAP |
| 4182 | tags=43%, 1364/29108CLDN4/PYCARD/TUBA1C/CXCL8/TUBA4A/ARPC1B/BAK1/MAPK |
| 4189 | tags=37%, 2919/29108CXCL1/PYCARD/CYBA/CXCL8/IKBKE/ITPR3/MAPK12/MAPK13 |
| 4185 | tags=44%, 8877/2207/SPHK1/FCER1G/MAPK12/MAPK13/FCGR3A/SRC/RIPK2/ITGAM |
| 5764 | tags=57%, 5315/991/9PKM/CDC20/CDK1/BAK1/CCNA2/CCNE1/SRC/YWHAZ/CDKN2A/ |
| 3826 | tags=40%, 4605/891/9MYBL2/CCNB1/CCNB2/FOXO1/E2F1/CXCL8/CDK1/ITPR3/CCN |
| 5796 | tags=47%, 29108/3576PYCARD/CXCL8/KPNA2/IKBKE/BAK1/ICAM1/HLA-DMA/HLA-D |
| 2724 | tags=34%, 4318/6659/MMP9/SOX4/CDCA5/E2F1/STMN1/BAK1/KIF23/CCNE1/CDC25 |
| 6495 | tags=61%, 10460/5491TACC3/RPP25/EIF4EBP1/NUP62/ALYREF/RAN/NUP210/RANG |
| 3917 | tags=57%, 1535/8479CYBA/TUBA1C/NCF2/TUBA4A/TUBA1B/TUBA3C/FCGR3A/ITGA  |
| 6588 | tags=70%, 6628/10262SNRPB/SF3B4/ALYREF/HSPA6/SNRPD2/SNRPD1/SNRPA1/HSP |
| 2874 | tags=50%, 991/2810/5CDC20/SFN/PLK1/CCNB1/PTTG1/CCNB2/CDC6/E2F1/CDK1/P |
| 6453 | tags=78%, 6132/6173/RPL8/RPL36A/MRPL17/MRPS12/RPS2/MRPL9/RPL17/RPSA/R |
| 3126 | tags=36%, 54209/1535TREM2/CYBA/NCF2/MAPK12/MAPK13/TYROBP/FCGR3A/CSF1/ |
| 4487 | tags=51%, 10053/5535AP1M2/LAPTM4B/CTSC/GLA/LAPTM5/PPT1/CTSV/ACP5/ATP6 |
| 3494 | tags=38%, 6696/1277/SPP1/COL1A1/ITGA3/ITGB4/COL1A2/HMMR/COL9A2/CD44/A |
| 2888 | tags=52%, 6364/2919/CCL20/CXCL1/CXCL6/CXCL8/CXCL5/ICAM1/CSF1/HLA-DMA/ |
| 3764 | tags=46%, 8612/8877/PLPP2/SPHK1/LIMK1/MARCKSL1/ARPC1B/RAC2/FCGR3A/MAR |
| 4903 | tags=62%, 54913/6949RPP25/TCOF1/NOP56/RAN/DKC1/NXT1/GTPBP4/NHP2/POP7/ |
| 2881 | tags=46%, 1535/65108CYBA/MARCKSL1/NCF2/MAPK12/MAPK13/FCGR3A/ITGAM/CYB |
| 5731 | tags=68%, 3108/972/3HLA-DMA/CD74/HLA-DRB1/HLA-DQA1/HLA-DRA/TAP1/HLA-D |
| 5486 | tags=60%, 10095/6714ARPC1B/SRC/DNM1/RHOG/WASF2/ITGA5/ARPC4/CLTA/MAD2L |
| 4647 | tags=46%, 29089/116CUBE2T/RMI2/RAD51/FANCI/FANCD2/EME1/FANCG/FAAP24/F |
| 2867 | tags=42%, 3108/7040/HLA-DMA/TGFB1/HLA-DRB1/HLA-DQA1/HLA-DRA/IL15RA/HL |
| 3537 | tags=38%, 3108/3123/HLA-DMA/HLA-DRB1/HLA-DQA1/HLA-DRA/HLA-DPA1/HLA-DQ |
| 3537 | tags=51%, 3108/3123/HLA-DMA/HLA-DRB1/HLA-DQA1/HLA-DRA/HLA-DPA1/HLA-DQ |
| 2542 | tags=46%, 4318/1869/MMP9/E2F1/CXCL8/SRC/CDKN2A/HRAS/CDK4/TYMP/MMP1/UP |
| 4703 | tags=78%, 4171/4173/MCM2/MCM4/RFC4/RNASEH2A/MCM6/FEN1/POLD1/MCM7/MCM3 |
| 2162 | tags=39%, 2207/3108/FCER1G/HLA-DMA/HLA-DRB1/HLA-DQA1/HLA-DRA/HLA-DPA1 |
| 4212 | tags=32%, 4318/11239MMP9/EGLN3/BIRC5/NQO1/SLC2A1/E2F1/CXCL8/EPO/IL2RG |
| 5455 | tags=41%, 25825/8479BACE2/TUBA1C/NDUFA4L2/TUBA4A/COX7B2/ITPR3/TUBA1B/ |
| 7364 | tags=55%, 2877/8479GPX2/TUBA1C/NDUFA4L2/TUBA4A/PFN2/COX7B2/ITPR3/MAP  |
| 5019 | tags=33%, 6364/2919/CCL20/CXCL1/CXCL6/TNFRSF21/CXCL8/EPO/CXCL5/IL2RG/ |
| 5664 | tags=47%, 7345/8479UCHL1/TUBA1C/NDUFA4L2/TUBA4A/COX7B2/ITPR3/TUBA1B/  |
| 3096 | tags=33%, 4318/6364/MMP9/CCL20/CXCL1/CXCL6/CXCL5/ICAM1/MAPK12/MAPK13/ |
| 4098 | tags=42%, 23643/630CLY96/MAPK12/MAPK13/HLA-DMA/TGFB1/IRAK1/BIRC3/HLA- |
| 6866 | tags=60%, 3561/6300/IL2RG/MAPK12/CD3D/MAPK13/NFKBIE/HLA-DMA/HLA-DRB1/ |
| 5764 | tags=48%, 4318/6280/MMP9/S100A9/CCL20/CXCL1/LCN2/CXCL6/CXCL8/CXCL5/IK |
| 3500 | tags=37%, 100133941/CD24/EPO/ITGA3/CD3D/CSF1/ITGAM/HLA-DMA/CD7/CD44/H |
| 5664 | tags=73%, 10213/5698PSMD14/PSMB9/PSMD2/PSMB2/PSME3/PSMB4/ADRM1/PSMB8/ |
| 4568 | tags=57%, 5888/8438/RAD51/RAD54L/POLD1/EME1/RBBP8/BRCA1/XRCC2/XRCC3/B |

6148 tags=47%, 1869/3576/E2F1/CXCL8/BAK1/ITPR3/MAPK12/RAC2/MAPK13/SRC/CDKN  
 4809 tags=36%, 5909/5217/RAP1GAP/PFN2/VEGFB/MAPK12/RAC2/MAPK13/LPAR2/ENAH/  
 6104 tags=49%, 6364/2919/CCL20/CXCL1/CXCL6/CXCL8/CXCL5/RAC2/SRC/HCK/PRKCD/  
 3551 tags=37%, 3576/1277/CXCL8/COL1A1/ICAM1/VEGFB/MAPK12/MAPK13/COL1A2/CYB  
 201 tags=100%, 10/7498/1ENAT2/XDH/CYP1A2/CYP2A6  
 4373 tags=35%, 6696/1277/SPP1/COL1A1/VEGFB/ITGA3/ITGB4/RAC2/SRC/COL1A2/FLN  
 5965 tags=50%, 1410/578/1CRYAB/BAK1/CKAP4/TUSC3/HSPA6/TRAF2/DDIT3/SSR2/DDO  
 1005 tags=60%, 56898/3157BDH2/HMGCS1/HMGCL/ACAT1/BDH1/HMGCS2  
 2911 tags=30%, 29108/3984PYCARD/LIMK1/CXCL8/MAPK12/RAC2/MAPK13/SRC/IRAK1/P  
 2911 tags=36%, 2919/3576/CXCL1/CXCL8/MAPK12/MAPK13/SRC/ATP6V1F/GIT1/ATP6V0  
 2385 tags=32%, 2539/5315/G6PD/PKM/SLC16A3/SLC1A5/HKDC1/PFKP/SLC2A1/HK2/GLS  
 6179 tags=67%, 3383/5880/ICAM1/RAC2/HLA-DMA/ITGB2/HLA-DRB1/HLA-DQA1/HLA-DR  
 3537 tags=47%, 3108/3123/HLA-DMA/HLA-DRB1/HLA-DQA1/HLA-DRA/HLA-DPA1/HLA-DQ  
 5143 tags=43%, 9641/3561/IKBKE/IL2RG/BAK1/CCNE1/CD3D/IRAK1/MX2/CDK4/HSPA6/  
 483 tags=71%, 3295/1109/HSD17B4/AKR1C4/AMACR/SCP2/CYP39A1/CYP27A1/BAAT/AC  
 5150 tags=40%, 6696/2364SPP1/LY96/CXCL8/IKBKE/MAPK12/MAPK13/IRAK1/CTSK/CC  
 893 tags=67%, 435/2805/ASL/GOT1/ACY1/GLUD1/ASS1/GLUL/GOT2/GPT2/ARG1/NAGS  
 974 tags=58%, 7367/219/UGT2B17/ALDH1B1/ALDH3A2/ALDH9A1/UGT2B4/ALDH7A1/UG  
 1168 tags=68%, 3067/3034/HDC/HAL/MAOA/ALDH1B1/ALDH3A2/ASPA/ALDH9A1/HNMT/MA  
 974 tags=42%, 7367/9942/UGT2B17/XLB/UGP2/UGT2B4/CRYL1/UGT2B7/DCXR/UGT2B1  
 358 tags=28%, 1573/84647CYP2J2/PLA2G12B/CYP1A2/CYP2E1/CYP2C9/CYP2C8/CYP3A  
 1005 tags=69%, 79944/5689L2HGDH/BDH2/HMGCS1/HMGCL/ACSM1/HADH/ACADS/ECHS1/A  
 734 tags=31%, 3171/3375/FOXA3/IAPP/FOXA2/NR5A2/HNF4A/GCK/PKLR/SLC2A2  
 940 tags=55%, 23417/2627MLYCD/HIBCH/ALDH1B1/ALDH3A2/ALDH9A1/ACADS/ECHS1/A  
 1191 tags=55%, 55902/509ACSS2/PCCA/AMT/PCCB/ACO1/MCEE/GLUL/ACAT1/HOGA1/GL  
 1053 tags=47%, 8659/435/ALDH4A1/ASL/GOT1/ASPA/GLUD1/ASS1/GLUL/GOT2/GPT2/G  
 1520 tags=27%, 2271/6392/FH/SDHD/ACO1/SUCLG2/PC/OGDHL/PCK2/PCK1  
 6180 tags=65%, 3561/915/IL2RG/CD3D/ADA/TAP1/JAK3/CD3E/RFXANK/RFX5/CD79A/L  
 1191 tags=58%, 593/55902/BCKDHA/ACSS2/PCCA/PCCB/DBT/MLYCD/HIBCH/ACACB/SUCL  
 1500 tags=30%, 23410/549SIRT3/NMRK1/SIRT1/NT5E/SIRT5/NNT/ENPP1/NADK2/AOX1  
 974 tags=24%, 7367/1356/UGT2B17/CP/UGT2B4/ALAS1/ALAD/UGT2B7/UGT2B15/UGT2B  
 875 tags=50%, 128/1644/4ADH5/DDC/MAOA/FAH/GOT1/MAOB/GSTZ1/GOT2/DBH/HGD/AD  
 4182 tags=37%, 29108/2207PYCARD/FCER1G/IKBKE/ITPR3/MAPK12/MAPK13/SRC/RELB/  
 1128 tags=58%, 23464/275/GCAT/AMT/MAOA/CBS/MAOB/GAMT/GLYCTK/ALDH7A1/ALAS1/  
 1191 tags=45%, 55902/98/ACSS2/ACYP2/ALDH1B1/ALDH3A2/ACACB/ALDH9A1/PC/ACAT  
 952 tags=60%, 169355/111IDO2/INMT/MAOA/ALDH1B1/ALDH3A2/ALDH9A1/HADH/ECHS1  
 834 tags=31%, 948/8613/CD36/PLPP3/GOT2/ACAT1/DGAT2/PLA2G12B/MTP/APOB/FA  
 1242 tags=74%, 128/37/30ADH5/ACADVL/HADHB/CPT2/ALDH1B1/ALDH3A2/ALDH9A1/HA  
 5072 tags=40%, 5347/891/PLK1/CCNB1/CCNB2/CDK1/PKMYT1/BUB1/CCNA2/MAPK12/MA  
 824 tags=29%, 2729/2805/GCLC/GOT1/CBS/GOT2/TST/ADI1/BHMT2/SDS/CTH/AGXT2/M  
 771 tags=45%, 7367/1583/UGT2B17/CYP11A1/CYP17A1/SULT1E1/HSD17B2/HSD17B8/C  
 974 tags=56%, 7367/54884UGT2B17/RETSAT/DHRS4/CYP2C18/ALDH1A1/CYP26A1/CYP3  
 1075 tags=46%, 1071/5590CETP/ANGPTL8/LDLR/CD36/APOE/APOC2/LIPG/ANGPTL4/LI  
 1229 tags=44%, 6303/1124SAT1/SAT2/ALDH4A1/AGMAT/MAOA/ALDH1B1/GOT1/ALDH3A2  
 6248 tags=55%, 29108/9641PYCARD/IKBKE/IL18/CCL5/POLR3K/IRF3/POLR2H/IRF7/CC  
 5661 tags=55%, 11015/929KDELRL3/ATP6V1F/ATP6V0B/SLC12A2/SEC61A1/SEC61G/ATP  
 1166 tags=66%, 64087/303MCCC2/HADHB/PCCA/PCCB/DBT/HMGCS1/HMGCL/HIBCH/ALDH  
 4112 tags=42%, 2919/2364CXCL1/LY96/CXCL8/ICAM1/IRAK1/BIRC3/BCL2A1/RELB/SY  
 2913 tags=32%, 6364/2919/CCL20/CXCL1/CXCL6/CXCL8/CXCL5/IL2RG/CSF1/IL18/CSF  
 2162 tags=35%, 3880/3383/KRT19/ICAM1/FCGR3A/ITGAM/KRT23/C1QB/HLA-DMA/C1QC/  
 3339 tags=31%, 4318/1277/MMP9/COL1A1/ITPR3/MAPK12/PLAUR/MAPK13/SRC/GPC3/CO

358 tags=18%, 1573/84647CYP2J2/PLA2G12B/EPHX2/CYP4F3/CYP4F2/CYP2B6/CYP2E1  
 1313 tags=43%, 79071/37/εELOVL6/ACADVL/HADHB/CPT2/CBR4/HADH/CPT1A/ACADS/EC  
 1242 tags=59%, 128/4257/εADH5/MGST1/GSTM5/FMO2/GSTO1/MGST2/UGT2B17/MAOA/MA  
 6866 tags=46%, 2207/3383/FCER1G/ICAM1/RAC2/TYROBP/FCGR3A/ITGB2/SYK/HRAS/IF  
 875 tags=53%, 1644/4128/DDC/MAOA/GOT1/MAOB/GOT2/PAH/HPD/GLYAT/TAT  
 3615 tags=37%, 3561/3108/IL2RG/HLA-DMA/TGFB1/HLA-DRB1/HLA-DQA1/IL18/HLA-DR  
 843 tags=25%, 219/224/2εALDH1B1/ALDH3A2/ALDH9A1/HADH/ECHS1/BBOX1/AADAT/AC  
 610 tags=52%, 128/4257/εADH5/MGST1/GSTM5/GSTO1/MGST2/UGT2B17/AKR7L/UGT2B4  
 922 tags=29%, 5236/219/εPGM1/ALDH1B1/ALDH3A2/ALDH9A1/GCK/ALDH7A1/ENO3/PKL  
 4490 tags=41%, 112399/651EGLN3/SLC2A1/TGFB1/HRAS/ARNT2/HIF1A/MAP2K2/MAPK3/  
 1242 tags=55%, 128/4257/εADH5/MGST1/NAT1/GSTM5/SULT1A1/GSTO1/MGST2/UGT2B17  
 2951 tags=28%, 991/5347/εCDC20/PLK1/CCNB1/PTTG1/CCNB2/CDK1/PKMYT1/BUB1/ITP  
 1211 tags=35%, 4257/9/294MGST1/NAT1/GSTM5/GSTO1/MGST2/UGT2B17/TPMT/UGT2B4/  
 2881 tags=29%, 2207/6300/FCER1G/MAPK12/ALOX5AP/RAC2/MAPK13/SYK/HRAS/VAV1/A  
 948 tags=45%, 3157/1376/HMGCS1/CPT2/CD36/AQP7/PPARA/CPT1A/ACAA1/ACADM/ACO  
 999 tags=33%, 48/435/28CACO1/ASL/GOT1/CBS/ACY1/ASS1/PC/GLUL/GOT2/GPT2/ARG  
 6224 tags=53%, 23381/101εSMG5/ALYREF/CSTF2/UPF3B/PPP2R1A/PELO/PABPC1/PPP2R  
 834 tags=22%, 948/32/514CD36/ACACB/PRKAG2/PPARA/CPT1A/IRS1/IRS2/ACSL6/PPA  
 3551 tags=34%, 3561/6300/IL2RG/MAPK12/CD3D/MAPK13/NFKBIE/HLA-DMA/TGFB1/HLA  
 974 tags=38%, 7367/8671/UGT2B17/SLC4A4/NROB2/ABCC2/CA2/SLC01A2/AQP8/LDLR/  
 2322 tags=26%, 84790/983/TUBA1C/CDK1/TUBA4A/ITPR3/TUBA1B/TUBA3C/SRC/HRAS/T  
 445 tags=28%, 23461/1034ABCA5/ABCA10/ABCC2/ABCA9/ABCC9/ABCG2/ABCA8/ABCB11  
 1830 tags=53%, 83594/582εNUDT12/ABCD3/MPV17L/PAOX/PEX13/PEX1/NOS2/PEX12/PE  
 2986 tags=25%, 4318/6692/MMP9/SPINT1/ETV4/SSX1/CXCL8/BAK1/CCNA2/ETV5/ITGAM  
 3537 tags=30%, 1364/3383/CLDN4/ICAM1/MPZL1/ITGAM/HLA-DMA/MPZ/ITGB2/SDC3/VC  
 3779 tags=32%, 1364/4318/CLDN4/MMP9/CYBA/NCF2/ICAM1/MAPK12/RAC2/MAPK13/ITG  
 1103 tags=60%, 1191/2157/CLU/F8/C8G/C1R/SERPINA1/C2/PROS1/VWF/CFI/C5/C1S/S  
 5288 tags=38%, 486/483/17FXDY2/ATP1B3/COX7B2/ATP1A1/TPM4/ASPH/UQCRH/TPM2/T  
 6818 tags=71%, 3108/3123/HLA-DMA/HLA-DRB1/HLA-DQA1/HLA-DRA/HLA-DPA1/HLA-DQ  
 4212 tags=32%, 6696/2056/SPP1/EPO/COL1A1/IL2RG/VEGFB/ITGA3/CCNE1/ITGB4/LPA  
 3826 tags=37%, 1869/578/εE2F1/BAK1/ITGA3/CCNE1/CKS2/BIRC3/ITGAV/COL4A5/LAM  
 4462 tags=34%, 2919/1869/CXCL1/E2F1/CXCL8/IKBKE/BAK1/ITPR3/ICAM1/MAPK12/MA  
 4093 tags=32%, 4318/332/1MMP9/BIRC5/E2F1/CXCL8/IKBKE/CCNA2/CCNE1/MAPK12/MA  
 4370 tags=57%, 80201/597εHKDC1/RENB/UP1L1/GNPDA1/HK2/NPL/CHIT1/HK3/GPI/G  
 4882 tags=38%, 29108/153εPYCARD/CYBB/PYGB/SQSTM1/BIRC3/IFNGR2/SLC25A6/TRAFF  
 917 tags=20%, 84699/583εCREB3L3/PYGL/CD36/ACACB/PRKAG2/PPARA/CPT1A/FOXO1/  
 4259 tags=34%, 8612/8877/PLPP2/SPHK1/GLA/GAL3ST1/SGPP2/NEU1/CERS5/DEGS1/SM  
 3461 tags=29%, 332/174/84BIRC5/AFP/TEAD2/TGFB1/YWHAZ/ITGB2/TEAD4/BIRC3/FZD  
 917 tags=20%, 84699/583εCREB3L3/PYGL/PDE3B/ACACB/PRKAG2/CAMK2B/PPARA/CPT1  
 3396 tags=27%, 4318/1277/MMP9/COL1A1/VEGFB/MAPK12/MAPK13/SRC/COL1A2/TGFB1/  
 5086 tags=43%, 486/483/17FXDY2/ATP1B3/DNM1/ATP1A1/PLCB1/CLTA/PLCB3/CLTB/AP  
 3129 tags=30%, 112399/22εEGLN3/ALDOA/HKDC1/ENO2/PFKP/SLC2A1/ENO1/EPO/TIMP1  
 4451 tags=59%, 5984/9156/RFC4/EXO1/POLD1/PCNA/RFC2/LIG1/MSH2/POLD3/RPA2/SS  
 1024 tags=33%, 128/55902/ADH5/ACSS2/PCCA/AMT/PCCB/ACO1/HIBCH/GOT1/SUCLG2/M  
 8241 tags=65%, 991/27338/CDC20/UBE2S/BIRC3/SAE1/UBE2M/UBE2Z/UBE2I/UBE2Q2/B  
 940 tags=17%, 23417/846εMLYCD/CREB3L3/CD36/ACACB/PRKAG2/ADRA1A/HNF4A/CPT1  
 843 tags=45%, 1806/7964εDPYD/PANK3/ALDH1B1/ALDH3A2/ENPP1/PANK1/ALDH2/DPYS  
 3099 tags=31%, 332/84790/BIRC5/TUBA1C/CTSC/TUBA4A/BAK1/ITPR3/TUBA1B/LMNB2/  
 926 tags=33%, 178/5236/εAGL/PGM1/PYGL/ENPP1/TREH/UGP2/GCK/GBA3/GYS2/G6PC  
 1865 tags=28%, 196883/364ADCY4/INSR/NPY1R/ADCY8/ADRB1/NPR1/ADCY1/PDE3B/AQP  
 843 tags=26%, 219/224/2εALDH1B1/ALDH3A2/ALDH9A1/LPIN2/PNPLA3/PLPP3/LIPG/T

6359 tags=58%, 196403/306DTX3/HDAC1/PSENEN/NUMBL/HDAC2/DVL3/HEYL/DTX2/JAG2  
3544 tags=28%, 6510/486/4SLC1A5/FXYD2/ATP1B3/COL1A1/SLC7A7/COL1A2/ATP1A1/C  
3512 tags=36%, 2810/891/9SFN/CCNB1/CCNB2/RRM2/CDK1/CCNE1/CDKN2A/CDK4/GTSE1  
5072 tags=33%, 4318/3880/MMP9/KRT19/ITPR3/SRC/KRT23/KRT17/PRKCD/TFF1/HRAS/  
999 tags=44%, 48/2805/9EAC01/GOT1/ACY1/AADAT/GOT2/GPT2/NAGS/GPT  
2196 tags=27%, 29108/2364PYCARD/LY96/CXCL6/CXCL8/CXCL5/MAPK12/MAPK13/ITGAM  
3485 tags=46%, 10331/2526B3GNT3/FUT4/B3GNT5/B4GALT3/B3GALNT1/ST3GAL4/FUT3/  
6866 tags=53%, 6300/915/5MAPK12/CD3D/MAPK13/NFKBIE/BATF/HRAS/IFNGR2/CD3E/H  
794 tags=35%, 32/84869/7ACACB/CBR4/HSD17B8/ACSL6/ACSL5/ACSL1  
360 tags=33%, 51380/570/CSAD/BAAT/CD01  
8379 tags=51%, 9641/578/6IKBKE/BAK1/SRC/HLA-DMA/IRAK1/CD74/BIRC3/HLA-DRB1/  
6747 tags=58%, 1869/6714/E2F1/SRC/SQSTM1/HRAS/FUNDC1/HIF1A/RAB7B/RRAS/TFE3  
3975 tags=32%, 8877/2207/SPHK1/FCER1G/MAPK12/RAC2/MAPK13/S1PR2/SGPP2/HRAS/



/ITGB4/COL1A2/COL9A2/TUBG1/EIF4EBP1/ITGAV/COL4A5/LAMB1/HES6/MX2/HRAS/ATP6V1F/CDKLC2/TUBB/PLCB1/SLC25A6/CREB3L1/IFT57/PSMD14/TUBB4B/TRAF2/UQCRH/BAX/CREB3/PSMD23/SRC/RIPK2/CD44/HK2/SQSTM1/ARHGEF2/CYTH4/IL18/PRKCD/CASP4/PLCD3/PLCB1/TRAF2/CCAPK13/RIPK2/GAPDH/FLNC/IRAK1/FLNA/BIRC3/KLC2/PKN1/CYTH4/IL18/HRAS/CASP4/S100A10K12/TUBA1B/RAC2/MAPK13/TUBA3C/CYBB/C1QB/STIP1/C1QC/C1QA/KLC2/PRNP/PRKCD/TUBB/NCB1B/CCNA2/CCNE1/CD3D/TSP0/SPI1/HLA-DMA/TGFB1/ITGB2/CDKN2A/HLA-DRB1/RELB/HLA-DQA/GIT1/ASAP1/HSPA6/DNAJC6/TFRC/CXCR4/GRK6/CHMP4B/RAB11FIP5/WIPF3/HSPA8/VPS37C/AR/ITGAM/IQGAP3/ITGB2/ITGAV/HRAS/GIT1/TMSB4X/EZR/FGD3/CFL1/WASF2/CXCR4/VAV1/BDKRB2/CD3D/MAPK13/CDC25C/IRAK1/APOBEC3B/TAP1/HRAS/CHEK1/CFL1/TRAF2/APOBEC3C/CXCR4/K13/NFKBIE/HLA-DMA/IRAK1/CD44/HLA-DRB1/RELB/HLA-DQA1/HLA-DRA/SYK/TAP1/CDK4/HLA-12/TUBA1B/MAPK13/TUBA3C/LPAR2/SRC/GAPDH/IRAK1/ARHGEF2/CYTH4/IL18/NCK2/CASP4/TUB/RIPK2/CYBB/BIRC3/PKN1/IL18/PRKCD/CASP4/PLCB1/TRPV2/TRPM2/GBP5/TRAF2/CCL5/GBP2/HLA-DMA/TGFB1/IRAK1/COR01A/FCGR2A/ITGB2/CD74/HLA-DRB1/HLA-DQA1/IL18/HLA-DRA/SYHDAC11/SYK/HRAS/CDK4/HDAC7/CHEK1/CREB3L1/SCRIB/TRAF2/JAK3/MAPKAPK2/BAX/NFKB2/CRA2/CCNE1/MAPK12/MAPK13/TGFB1/E2F5/SQSTM1/CDKN2A/EIF4EBP1/CDC25A/HRAS/CDK4/CHEK1RB1/HLA-DQA1/IL18/HLA-DRA/MX2/CDK4/HLA-DPA1/IFNGR2/HLA-DQB1/SLC25A6/HLA-DMB/CCLB/MARCKS/EFNA3/CDC25C/CD44/SLC7A1/CDKN2A/GLS/IGF2BP1/EFNA4/CDC25A/HRAS/DNMT1/EZAP1/EIF3B/UBE2I/UPF3B/EIF2S2/PABPC1/NUP93/NUP37/RNPS1/NDC1/NXT1/NUP205/NUP188/NM/CYBB/HLA-DMA/COR01A/FCGR2A/ITGB2/HLA-DRB1/ITGAV/HLA-DQA1/HLA-DRA/TAP1/ATP6V1FA8/SNRPA/SF3A2/LSM4/PPIH/EFTUD2/PUF60/SNRPE/SNRPF/NCBP2/LSM7/TXNL4A/SF3B5/SNRPCKMYT1/CDC45/MCM2/BUB1/BUB1B/CCNA2/ORC6/MCM4/CCNE1/CDC25B/ORC1/TTK/TGFB1/YWHAZ/CPLP2/RPL10L/RPL39/RPL28/RPS5/MRPL12/RPL7/MRPL13/RPS21/RPL35A/RPS20/RPS3/RPL27/RSP11/TGFB1/FCGR2A/SQSTM1/RELB/ACP5/SYK/CSF1R/IFNGR2/NCF4/CTSK/NCF1/TNFRSF11B/TRVOB/CTSK/CTSA/CLTA/GM2A/TCIRG1/ATP6VOD2/NEU1/ATP6AP1/FUCA2/AP4M1/SORT1/CD63/NPCGRN/ITGAV/COL4A5/LAMB1/COMP/LAMC1/ITGA5/RELN/LAMC2/LAMA5/FRAS1/COL6A3/TNC/ITGB5TGFB1/ITGB2/HLA-DRB1/HLA-DQA1/ACP5/IL18/HLA-DRA/ATP6V1F/HLA-DPA1/HLA-DQB1/ATP6VCKS/HCK/SYK/VASP/PRKCD/ASAP1/NCF1/CFL1/WASF2/VAV1/LIMK2/ARPC4/MAPK3/ARPC3/ARPC2FBL/NOP58/RRP7A/UTP14A/UTP18/EMG1/POP1/GNL2/SNU13/DROSHA/UTP4/GNL3/UTP6/POP5/NOB/HLA-DMA/TGFB1/IRAK1/FCGR2A/ITGB2/HLA-DRB1/HLA-DQA1/HLA-DRA/HLA-DPA1/IFNGR2/NCPA1/HLA-DQB1/IFI30/HSPA6/HLA-DMB/HLA-DPB1/HSPA8/HLA-A/HSP90AB1/RFXANK/CTSS/PSME2/ARPC3/ARPC2/HCLS1/PIK3CD/ACTG1/ARPC5L/SHC1/RAC1/BCAR1/ACTB/WASF1/CLTB/CTTN/CDANCE/BRCA1/BLM/FANCA/USP1/RAD51C/TELO2/EME2/RPA2/ERCC1/FANCF/RPA1/MUS81/ATRA-DPA1/HLA-DQB1/HLA-DMB/CD86/CXCR4/HLA-DPB1/HLA-DQA2/CCL28/HLA-DRB5/IL15/TNFSF1B1/HLA-DMB/CD86/HLA-DPB1/HLA-A/CTLA4/HLA-DQA2/HLA-B/HLA-DRB5/GZMB/HLA-DOA/HLA-FB1/HLA-DMB/CD86/HLA-DPB1/HLA-A/HLA-DQA2/HLA-B/HLA-DRB5/IL1B/ICA1/GAD1/CPE/GZMB/K3A/MMP2/MAP2K2/MAPK3/E2F3/DAPK3/NRAS/FGFR3/RASSF1/E2F2/MCM5/POLA2/PCNA/RFC2/LIG1/PRIM1/POLA1/POLE4/PRIM2/POLD3/DNA2/RPA2/SSBP1/RFC5/RHLA-DQB1/HLA-DMB/HLA-DPB1/HLA-DQA2/HLA-DRB5/BAK1/VEGFB/ITGA3/CCNA2/CCNE1/RAC2/CKS2/LPAR2/RAD51/SPI1/TXNRD1/GSTP1/TGFB1/CDKTUBA3C/CSF1/GAPDH/CYBB/KLC2/HRAS/DKK1/TUBB/FZD6/PLCB1/SLC25A6/PSMD14/FZD7/TUBB4K12/TUBA1B/MAPK13/TUBA3C/SQSTM1/KLC2/NUP62/TUBB/ALYREF/TOMM40/PSMD14/TUBB4B/TRACSF1/LIF/TNFRSF12A/OSMR/TGFB1/GDF15/CLCF1/IL18/CSF1R/CSF3R/IL15RA/REL/IFNGR2/LTUBA3C/KLC2/TUBB/SLC25A6/PSMD14/TUBB4B/DDIT3/UQCRH/BAX/PSMD2/TUBA1A/CYC1/TUBB6/MMP14/CSF1/LIF/BIRC3/CREB3L1/TRAF2/CCL5/CREB3/TRAF5/MAPK3/IRF1/SOCS3/RPS6KA4/PIDRB1/LAMB1/HLA-DQA1/HLA-DRA/HLA-DPA1/IFNGR2/HLA-DQB1/HSPA6/HLA-DMB/LAMC1/HLA-DPHLA-DQA1/HLA-DRA/HLA-DPA1/IFNGR2/HLA-DQB1/HLA-DMB/JAK3/HLA-DPB1/CD3E/MAPK3/STATBKE/MAPK12/MAPK13/S100A8/MMP1/TRAF2/TRAF5/MAPK3/HSP90AB1/CCL2/CXCL3/IL1B/MAPK11LA-DRB1/HLA-DQA1/HLA-DRA/CSF1R/CSF3R/HLA-DPA1/HLA-DQB1/HLA-DMB/TFRC/CD37/ITGA5/PSMA5/PSMC4/PSMB10/PSMD13/PSMD11/PSMA7/PSMD1/PSMD7/PSMB3/PSMD4/PSMD3/PSMD9/PSMDLM/TOPBP1/BARD1/POLD3/RAD51C/BABAM1/RPA2/SSBP1/NBN/RAD51D/UIMC1/RPA1/MUS81

2A/EIF4EBP1/ITGAV/TAP1/HRAS/CDK4/PLCB1/CREB3L1/TRAF2/CCL5/CXCR4/BAX/CREB3/HLA-A  
SRC/CSF1/ITGAM/EFNA3/ITGB2/EFNA4/VASP/HRAS/CSF1R/PGF/PLCB1/VAV1/APBB1IP/EFNA5/R  
HRAS/PLCB1/NCF1/CCL5/JAK3/CXCR4/VAV1/GRK6/CCL26/MAPK3/GNGT1/CXCL13/STAT1/PAK1/C  
B/TGFB1/COL4A5/PRKCD/HRAS/PLCD3/CDK4/COL3A1/PLCB1/BAX/SERPINE1/MMP2/MAPK3/STAT1

C/FLNA/COL9A2/BIRC3/ITGAV/COL4A5/LAMB1/VASP/HRAS/PGF/ZYX/COMP/LAMC1/VAV1/ITGA5/  
ST/BAX/DNAJC5/HSPA8/SEC61A1/SEC61G/HSP90AB1/HYOU1/HSPH1/NPLOC4/MAN1B1/HSPBP1/UB

KN1/IL18/RHOG/RPS6KA1/TRAF2/WASF2/VAV1/ITGA5/WIPF3/MAP2K2/MAPK3/WIPF1/PIP5K1C/I  
B/CCL5/ATP6V1C1/TCIRG1/ATP6VOD2/ATP6AP1/PAK1/ATP6V1H/LYN/CXCL3/RAC1/ATP6V1E1/AT  
/SLC7A5/HRAS/SIRT6/HIF1A/MAP2K2/MAPK3/HK3/FGFR1/PIK3CD/LDHA/NRAS/PFKM/FGFR3  
A/HLA-DPA1/HLA-DQB1/HLA-DMB/CD86/HLA-DPB1/HLA-A/HLA-DQA2/ACTG1/HLA-B/RAC1/HLA-D  
B1/HLA-DMB/CD86/HLA-DPB1/HLA-A/HLA-DQA2/HLA-B/HLA-DRB5/IL1B/GZMB/HLA-DOA/HLA-F  
JAK3/MSN/BAX/HSPA8/CD3E/STAT1/IRF3/IRF7/PIK3CD/CDK2/BBC3/CD209/BID/IL1B/IL2RA/C  
OX2/CYP7A1/AKR1D1/SLC27A5/CYP8B1

L5/CD86/MAP2K2/MAPK3/STAT1/IRF3/IRF7/CCL4/PIK3CD/RAC1/IL1B/CXCL9/CCL3/MAPK11/CX  
/GLS2/GPT/CPS1/OTC

T2B7/ALDH2/UGT2B15/RGN/UGT2B10

OB/ALDH7A1/CNDP1/ALDH2/AMDHD1/FTCD/UROC1

5/SORD/UGT2B10

4

CAT1/ACSM3/ALDH5A1/BDH1/ABAT/ACSM5/EHHADH/HMGCS2/ACSM2B/ACSM2A

COX1/ALDH7A1/CNDP1/ALDH2/ALDH6A1/ABAT/DPYS/EHHADH/UPB1

YCTK/GRHPR/SHMT1/CAT/HAO2/HAO1/AGXT

LS2/GPT/ALDH5A1/AGXT2/ABAT/CPS1/AGXT

CK/CD8A/BTK/IKBKG/CIITA/TAP2/PTPRC/CD4/DCLRE1C/ICOS/UNG/CD19/CD8B

G2/BCKDHB/MCEE/ACADS/ECHS1/ACSS3/ACAT1/ACOX1/ALDH6A1/ABAT/EHHADH

/ASPDH

10

H6/AOX1/HPD/ADH1A/ADH1C/TAT/ADH4/ADH1B

SYK/PRKCD/HRAS/LSP1/MAPKAPK2/NFKB2/CARD9/MAPK3/RRAS/STAT1/PAK1/IRF1/PIK3CD/BCL3

GRHPR/SDS/SHMT1/SARDH/CTH/GATM/AGXT2/PIPOX/DMGDH/DAO/AGXT/GNMT/BHMT

1/HAGH/ALDH7A1/GRHPR/LDHD/PKLR/ACOT12/ALDH2/PCK2/PCK1

/MAOB/AADAT/KMO/ACMSD/ACAT1/GCDH/ALDH7A1/TDO2/DHTKD1/CAT/HAAO/ALDH2/CYP1A1/ALDH

BP1/ABCG8/ABCG5/APOA1/MOGAT2

DH/CPT1A/ACADS/ECHS1/ECI2/ACAA1/ACADM/ACAT1/ACOX1/GCDH/ACAA2/ACSL6/ALDH7A1/ACSL

PK13/CDC25B/AURKA/CDC25C/MAD2L1/CDC25A/RPS6KA1/MAPK3/HSP90AB1/MAD2L2/ANAPC7/PIK

AT1A/CD01/BHMT/TAT

YP3A7/SRD5A1/UGT2B4/AKR1C4/UGT2B7/SRD5A2/CYP3A5/CYP1A1/UGT2B15/CYP7A1/UGT2B10/A

A7/UGT2B4/RDH5/UGT2B7/CYP3A5/CYP1A1/UGT2B15/ADH6/AOX1/UGT2B10/RDH16/CYP1A2/HSD1

PC/CYP27A1/APOB/APOC1/ABCB11/ABCG8/LPA/APOH/ABCG5/APOA2/LCAT/ANGPTL3/CYP7A1/APO

/ALDH9A1/PRODH/MAOB/GAMT/GOT2/HOGA1/ALDH7A1/ARG1/CNDP1/PRODH2/ALDH2/GATM/DAO

L4/CASP1/IL1B/POLR2K/IKBKG/POLR2L/POLR3C/POLR3D/POLR3H/MAVS/NFKBIB/CXCL10/POLR2

6V1C1/TCIRG1/ATP6VOD2/ATP6AP1/ATP6V1H/ACTG1/KCNQ1/KDELRL1/ACTB/ATP6V1E1/ATP6VOC/

1B1/ALDH3A2/ALDH9A1/BCKDHB/HADH/MCEE/ACADS/HIBADH/ECHS1/ACAA1/ACADM/ACAT1/IVD/A

K/LTB/TRAF2/PLAU/NFKB2/UBE2I/TRAF5/EDA/CARD10/TNFRSF11A/CCL13/LYN/CCL4/CARD11/C

1R/CCL5/CXCR4/CCL26/IL34/CXCL13/CCL13/CCL4/CCL2/CCL28/CXCL3/TNFRSF10C/IL2RA/CXC

FCGR2A/ITGB2/KRT17/C1QA/HLA-DRB1/PTAFR/HLA-DQA1/HLA-DRA/HLA-DPA1/HLA-DQB1/HLA-D

L1A2/FLNC/TGFB1/FLNA/CD44/ITGAV/HRAS/GPC1/FZD6/EZR/FZD7/PLAU/VAV1/MSN/ITGA5/IQG

/CYP4A11/CYP2C9/CYP2C8

HS1/ELOVL2/HSD17B8/ACAA1/ACADM/HSD17B4/ACAT1/ACOX1/ACAA2/ACSL6/SCP2/ACSL5/ACADL  
OB/UGT2B4/GSTA2/FMO4/UGT2B7/FMO5/CYP3A5/GSTM1/UGT2B15/CYP2D6/ADH6/GSTA1/AOX1/UG  
NGR2/HGST/VAV1/HLA-A/MAP2K2/MAPK3/PAK1/ULBP2/PIK3CD/SHC1/LCP2/HLA-B/RAC1/BID/NR

A/HLA-DPA1/IFNGR2/HLA-DQB1/HLA-DMB/HLA-DPB1/STAT1/HLA-DQA2/TGFB2/HLA-DRB5/IL1B/  
AT1/GCDH/ALDH7A1/DHTKD1/AASS/ALDH2/PIPOX/EHHADH

/CYP2A13/EPHX1/GSTA2/UGT2B7/CYP3A5/CYP1A1/GSTM1/UGT2B15/AKR7A3/CYP2D6/ADH6/GSTA  
R/ALDH2/PCK2/ADH6/FBP1/G6PC/ADH1A/ALDOB/ADH1C/PCK1/ADH4/ADH1B

PAK1/TFE3/PAK4/PIK3CD/TGFA/TGFB2/RAC1/NRAS/PRCC/GRB2/TGFB3/CDC42/RBX1/VHL/BAD/P  
/SULT1A2/CYP2C18/CYP3A7/UGT2B4/CYP2A13/EPHX1/GSTA2/CYP3A43/UGT2B7/NAT2/CYP3A5/C  
R3/CCNE1/MAPK12/MAPK13/AURKA/YWHAZ/CDC25C/MAD2L1/RPS6KA1/ESPL1/PPP2R1A/MAPK3/SG  
UPP2/CES1/GSTA2/UGT2B7/NAT2/CES2/XDH/GSTM1/UGT2B15/GSTA1/DPYS/UGT2B10/UPB1/CYP2  
LOX5/MAP2K2/MAPK3/LYN/PIK3CD/LCP2/RAC1/NRAS/GRB2/BTK/MAPK11

X1/ANGPTL4/ACSL6/PLIN5/SCP2/ACSL5/PLIN1/CYP27A1/ACADL/ACSL1/FABP1/ACOX2/APOA2/S  
1/NAGS/SDS/SHMT1/GPT/ENO3/PKLR/CTH/MAT1A/PAH/CPS1/OTC/ALDOB

2C/RNPS1/NXT1/NCBP2/PPP1CA/PPP1CC/DAZAP1/CPSF1/EIF4A3/CPSF6/PABPC4/MSI2/FUS/CPS  
RGC1A/ACSL5/LEPR/ACSL1/PCK2/G6PC/PCK1

-DRB1/HLA-DQA1/HLA-DRA/HLA-DPA1/IFNGR2/HLA-DQB1/HLA-DMB/JAK3/HLA-DPB1/CD3E/HIF1  
ADCY1/UGT2B4/ABCG2/EPHX1/BAAT/UGT2B7/ABCB11/ABCG8/SLC51A/ABCG5/UGT2B15/SLC01B3/  
UBB/PLCB1/TUBB4B/TUBA1A/MAP2K2/MAPK3/TUBB6/TUBB2A/PLCB3/CSNK1D/TUBB4A/TUBB2B/NR  
/ABCG8/ABCG5/ABCA6/ABCB4

X19/DECR2/CRAT/ECH1/SOD1/MLYCD/HMGCL/DHRS4/NUDT7/PEX11A/ECI2/PEX11G/ACAA1/HSD17  
/SPI1/BIRC3/BCL2A1/CSF1R/ARNT2/TCF3/DDIT3/IGFBP3/PLAU/CD86/BAX/PROM1/MLLT3/HDAC  
AN/HLA-DRB1/ITGAV/HLA-DQA1/HLA-DRA/HLA-DPA1/NECTIN1/HLA-DQB1/VTCN1/HLA-DMB/CD86  
AM/CYBB/ITGB2/VASP/EZR/NCF4/NCF1/CXCR4/VAV1/MSN/MMP2/THY1/PIK3CD/ACTG1/RAC1/BCA  
ERPING1/CFH/CFB/FGB/F10/C3/FGG/VTN/F5/C4BPB/CFHR1/FGA/PROC/SERPINA5/CFHR2/C7/MB  
PM3/CYC1/SLC9A1/SLC9A7/ATP2A3/COX6B1/COX8A/ATP1B1/CACNG4/COX7B/TNNI3/UQCRB/CACN  
B1/HLA-DMB/CD86/HLA-DPB1/HLA-A/HLA-DQA2/HLA-B/HLA-DRB5/GZMB/HLA-DOA/HLA-F/HLA-C  
R2/CSF1/COL1A2/OSMR/EFNA3/YWHAZ/COL9A2/EIF4EBP1/PKN1/ITGAV/COL4A5/LAMB1/SYK/EFN  
B1/CDK4/LAMC1/TRAF2/BAX/LAMC2/TRAF5/LAMA5/CKS1B/E2F3/CDKN2B/PIK3CD/CDK2/BIRC7/I  
PK13/SRC/HCK/SYK/HRAS/CDK4/TRAF2/CD86/MAPKAPK2/BAX/HLA-A/HIF1A/MAP2K2/MAPK3/GNG  
PK13/SRC/TGFB1/YWHAZ/IRAK1/HRAS/CREB3L1/JAK3/BAX/CREB3/MAP2K2/ATP6AP1/MAPK3/PCN  
FPT2/TSTA3/UGDH/GNPDA2/UXS1/NAGK/NANS/HK1/GMDS/GMPPA/AMDHD2/HEXB/GMPPB/CYB5R1/G  
2/JAK3/RBCK1/CHMP4B/BAX/TRAF5/CHMP4C/HSP90AB1/FTH1/SHARPIN/STAT1/PPIA/CASP1/FTL  
IRS1/PIK3R1/IRS2/PPARGC1A/MLXIPL/PPP1R3B/SLC27A2/PCK2/GYS2/SLC2A2/G6PC/SLC27A5/  
PD2/ASAHI/GBA/SMPD4/CERS6/PSAP/ACER3/UGCG

6/DLG3/AREG/SCRIB/FZD7/SERPINE1/FZD1/PPP2R1A/PPP2R2C/CSNK1E/DVL3/YWHAH/CSNK1D/A  
A/SIK2/FOXO1/GCK/PPARGC1A/ITPR2/PFKFB1/PCK2/FBP1/GCGR/GYS2/SLC2A2/G6PC/PCK1  
COL4A5/HRAS/COL3A1/PLCB1/GNA15/CREB3L1/MMP1/CREB3/MMP2/MAP2K2/MAPK3/GNGT1/PLCB3  
2M1/AP2S1/PLCB2/ATP1B1/VDR/DNM2/CLTC/RAB11A/ATP2B4/ADCY6/AP2A2/AP2B1/AP2A1/BDKR  
/GAPDH/CYBB/HK2/EIF4EBP1/PFKFB3/PGK1/IFNGR2/TFRC/HMOX1/SERPINE1/HIF1A/MAP2K2/MA  
BP1/RFC5/MSH6/RPA1

CEE/ACADS/ECHS1/IDNK/GLUD1/PC/GOT2/ACAT1/ACOX1/GCK/TKFC/GLYCTK/GPT2/SDS/SHMT1/G  
RCA1/SOCS1/UBE2J2/ANAPC7/SOCS3/BIRC7/UBE2D1/UBE2L3/UBE2E1/UBE2A/PIAS3/ANAPC11/U  
A/FOXO1/IRS1/PIK3R1/IRS2/PPARGC1A/LEPR/PFKFB1/PCK2/FBP1/GYS2/G6PC/PCK1

/UPB1

TUBA3C/LMNB1/CTSV/BIRC3/BCL2A1/HRAS/CTSK/TRAF2/DDIT3/BAX/CASP2/TUBA1A/MAP2K2/MA

7/IRS1/PIK3R1/IRS2/ADRB2/PLIN1/FABP4

KFC/GLYCTK/DGAT2/ALDH7A1/LIPC/GPAM/ALDH2/MOGAT2

/JAG1/DVL2/KAT2A/APH1B/HEY1/NCOR2/MFNG/CTBP2/ADAM17/NOTCH3/NOTCH1/LFNG/PSEN2/RB  
OL9A2/COL4A5/COL3A1/COL16A1/COL5A1/COL5A2/SLC7A8/MEP1A/COL6A3/SLC3A2/KCNQ1/SLC3  
/CHEK1/IGFBP3/BAX/SERPINE1/PERP/AIFM2/PMAIP1/CDK2/BBC3/BID/CCND2/CYCS/GORAB/THB  
PLCB1/HSPA6/CREB3L1/HSPA8/CREB3/MMP2/MAP2K2/MAPK3/HSP90AB1/PLCB3/KRT18/FKBP4/PI

/C1QB/C1QC/IRAK1/ITGB2/C1QA/CFL1/ITGA5/MAPK3/IRF1/IRF3/CASP1/IL1B  
B4GALT2/A4GALT/FUT2/FUT1/FUT6  
IF1A/MAP2K2/MAPK3/STAT1/PIK3CD/BATF2/PDCD1/NRAS/LCK/PTPN6/BATF3/MAPK11/IKBKG/RP

EIF4EBP1/HLA-DQA1/HLA-DRA/SYK/TAP1/ALYREF/HLA-DPA1/NECTIN1/IFNGR2/HLA-DQB1/ZNF8  
/MITF/ATF4/NRAS/PGAM5/MRAS/RHOT2/RPS27A/CSNK2B/BNIP3L/CSNK2A1/OPTN/UBA52/BECN1/  
PLCB1/ADORA1/TRAF2/BAX/PPP2R1A/MAP2K2/MAPK3/CERS5/NSMAF/GNA12/PPP2R2C/DEGS1/SMP

K4/FZD6/HES4/DLG3/ATP6V0B/CREB3L1/SCRIB/FZD7/COMP/LAMC1/ITGA5/RELN/BAX/CREB3/LA  
/CLTA/TUBA1A/CYC1/STX1A/TUBB6/HDAC1/KLC3/GPX8/TUBB2A/PSMB2/POLR2G/GPX7/HDAC2/PL  
L5/WASF2/RBCK1/ITGA5/BAX/RRAGD/ARPC4/RRAGC/TRAF5/MAPK3/SHARPIN/HK3/ARPC3/ARPC2/  
/RHOG/TRAF2/BAX/ARPC4/MAP2K2/MAPK3/HSP90AB1/RAB7B/KLC3/DYNLL1/RRAS/DYNC1H1/ARPC  
F4/HSPA6/SLC25A6/CREB3L1/PSMD14/NCF1/LAMC1/TUBB4B/DDIT3/CCL5/UQCRH/BAX/HSPA8/CR  
1/MAD2L1/HLA-DRA/HRAS/CDK4/IL15RA/HLA-DPA1/HLA-DQB1/CHEK1/RAN/SLC25A6/CREB3L1/H  
PC4/CLTA/HLA-A/CHMP4C/WIPF1/HGS/FGFR4/ARPC3/ARPC2/RAB35/PIP5K1C/ARF3/CYTH2/SH3K  
1/MSN/ITGA5/IQGAP1/ITGAX/LIMK2/ARPC4/SLC9A1/MAP2K2/MAPK3/GNA12/FGFR4/RRAS/ARPC3  
BAX/LIMK2/CD3E/HLA-A/TRAF5/MAP2K2/MAPK3/GNGT1/PAK1/IRF3/PAK4/PIK3CD/GNG5/GNB2/H  
DPA1/HLA-DQB1/PSMD14/HLA-DMB/TRAF2/JAK3/HLA-DPB1/BAX/NFKB2/PSMD2/CD3E/ISG15/HLA  
B/EZR/TUBB4B/TRAF2/WASF2/BAX/WIPF3/ARPC4/TUBA1A/MAPK3/BAIAP2L1/TUBB6/GNA12/WIPF  
RBCK1/CARD9/TRAF5/MAPK3/HSP90AB1/SHARPIN/STAT1/IRF3/PLCB3/IRF7/MCU/PSTPIP1/CCL2  
K/HLA-DPA1/LSP1/IFNGR2/HLA-DQB1/ATP6V0B/HLA-DMB/MRC2/HLA-DPB1/BAX/ITGAX/CARD9/T  
EB3/HLA-A/TRAF5/ATP6VOD2/MAPK3/HDAC1/RBL1/IRF3/HDAC2/LYN/IRF7/CDKN2B/YWHAH/PMAI  
/SLC25A6/IGFBP3/MAPKAPK2/SERPINE1/HLA-A/MAP2K2/MAPK3/E2F3/RRAS/RBL1/E2F4/CDKN2B  
5/HLA-DPB1/BAX/MAP2K2/MAPK3/STAT1/NXT1/IRF3/HLA-DQA2/IRF7/SOCS3/PIK3CD/ACTG1/CC  
H2/EZR/FSCN1/PLAU/ITGA5/HMOX1/EFNA5/UBE2I/MAP2K2/MAPK3/BRCA1/HDAC1/E2F3/ST14/BM  
CBP2/POP7/EIF3I/KPNB1/XPOT/EIF3D/EEF1A2/GEMIN7/NUP85/THOC6/POP1/EIF4A3/NUP43/TH  
/TUBB/HLA-DPA1/NCF4/HLA-DQB1/ATP6V0B/COMP/NCF1/HLA-DMB/TUBB4B/TFRC/ITGA5/MRC2/H  
/PPIL1/SRSF9/SNRNP40/U2AF2/BUD31/LSM2/PQBP1/EIF4A3/PRPF3/ISY1/SF3A3/SNU13/PRPF6  
DC25C/E2F5/MCM6/CDKN2A/MCM7/MAD2L1/MCM3/CDC25A/CDK4/CDKN2D/CDC7/CHEK1/MCM5/ESPL  
PLP0/RPL18A/RPL35/RPS19/RPL38/RPL23/RPL18/RPL23A/MRPL10/RPS10/MRPS15/MRPS7/RPL5  
AF2/NFKB2/MAPK3/TNFRSF11A/STAT1/SOCS1/MITF/SIRPG/SOCS3/PIK3CD/SIRPA/LCP2/TGFB2/  
1/CTSS/NPC2/ATP6V1H/ASAHI/CTSE/SLC11A1/CD68/LAMP3/CLN3/GBA/AP3M2/CLTB/GNS/GALNS  
/SV2A/ITGA2/COL6A2/COL4A2/LAMB3/CD47/IBSP/ITGB8/THBS1/THBS2/LAMA4  
OB/CTSK/MMP1/HLA-DMB/LTB/CCL5/CD86/HLA-DPB1/ATP6V1C1/TCIRG1/ATP6VOD2/ATP6AP1/TN  
/PAK1/PIP5K1C/LYN/BIN1/PIK3CD/ARPC5L/RAC1/WAS/WASF1/CDC42/FCGR3B/RPS6KB2/ARPC1A  
P10/HEATR1/GAR1/REXO2/NAT10/CSNK2B/NVL/NOL6/CSNK2A1/BMS1/NOB1/WDR75/LSG1/RBM28/  
F4/HLA-DQB1/NCF1/HLA-DMB/HLA-DPB1/MAPK3/STAT1/HLA-DQA2/EEF1A2/TGFB2/HLA-DRB5/IL  
3/HLA-DQA2/HSPA4/HLA-B/HLA-DRB5/RFX5/CALR/CD8A/NFYC/HLA-DOA/CIITA/HSPA5/HSP90AA  
C42/VCL/CBL/ARPC1A/ARPC5/CTNNA1/DNM2/PTK2/CD2AP/CLTC/RHOA/ELMO2/CAV1/PIK3CB/CAV

3B/MAP3K14/LTBR

HSPD1/HLA-DOA/HLA-F

NASEH2C/POLE3/RPA1/RNASEH1/POLE2

N2A/BIRC3/ITGAV/COL4A5/LAMB1/HRAS/CSF1R/PGF/CDK4/CSF3R/FZD6/IL15RA/PLCB1/IFNGR2  
B/TRAF2/DDIT3/UQCRH/PSMD2/FZD1/TUBA1A/CYC1/MAP2K2/MAPK3/TUBB6/KLC3/TUBB2A/PSMB2  
F2/DDIT3/UQCRH/BAX/NUP210/PSMD2/TUBA1A/CYC1/TUBB6/KLC3/GPX8/TUBB2A/NUP93/PSMB2/  
TB/TNFRSF11B/CCL5/TNFRSF18/CXCR4/TNFSF9/CCL26/IL34/IL27RA/EDA/TNFRSF4/TNFRSF11A  
KLC3/TUBB2A/PSMB2/UBE2J2/MCU/TUBB4A/ATF4/PSMB4/ADRM1/VDAC1/PSMA5/PSMC4/TUBB2B/P  
K3CD/BCL3/CCL2/ATF4/CXCL3/IL1B/MLKL/JAG1/IL15/MAP3K14/DNM1L/PGAM5/MAPK11/IKBKG/  
B1/HSPA8/LAMC2/AOX5/LAMA5/MAPK3/STAT1/SOCS1/HLA-DQA2/BIRC7/TGFB2/HLA-DRB5/LAMB  
1/HLA-DQA2/JAG2/HLA-DRB5/IL2RA/LCK/JAG1/IL12RB1/IL2RB/MAPK11/IKBKG/IL4R/HLA-DOA  
/IKBKG/TRAF3/FADD/MAPK7/TRAF4/S100A7/HSP90AA1/TRADD/HSP90B1/MUC5B/CASP8/TNFAIP3  
HLA-DPB1/CD2/CD3E/HLA-DQA2/HLA-DRB5/IL1B/IL2RA/ITGA2/IL1R2/CD8A/IL4R/CSF2RA/CD3  
8/PSMA1/PSMA4/PSMB5/PSMC5/PSMC3/POMP/PSMB1/PSMB6/PSMA3/IFNG/PSMB7

/TRAF5/MAP2K2/MAPK3/GNGT1/GNA12/E2F3/IRF3/PLCB3/CCL4/PIK3CD/CCL2/ATF4/GNG5/GNB2  
GS14/MAP2K2/MAPK3/FPR1/FGFR4/RRAS/PLCB3/FGFR1/PIK3CD/ACTG1/LCP2/RAC1/BCAR1/NRAS  
CL13/PLCB3/LYN/CCL4/PIK3CD/SHC1/CCL2/GNG5/CXCL16/CCL28/GNB2/CXCL3/RAC1/BCAR1/GN  
/PLCB3/PIK3CD/CCL2/F3/TGFB2/RAC1/IL1B/NRAS/COL4A2/TGFB3/CDC42/MAPK11/VCAM1/PLCB

RELN/LAMC2/LAMA5/MAPK3/PAK1/PIP5K1C/COL6A3/PAK4/PIK3CD/ACTG1/SHC1/TNC/ITGB5/PPP  
E2J2/BCAP31/TRAM1L1/ATF4/RPN2/CAPN1/UBE2D1/STT3A/DNAJC10/DNAJB2/WFS1/BAG2/SSR3/

RF3/PIK3CD/ACTG1/CCL2/LCP2/CASP1/RAC1/BCAR1/IL1B/ACTB/WAS/LCK/CD8A/CDC42/MAPK11  
P6VOC/MAP3K14/CDC42/MAPK11/ATP6V0E1/IKBKG

RB5/BID/ACTB/CYCS/HLA-DOA/HLA-F/ABL1/CASP8/EIF4G3/CAV1/EIF4G2/HLA-C/CASP3/ITGAL

CND2/CYCS/IL2RB/EIF3H/IKBKG/TRAF3/FADD/RACK1/FCGR2B/CCND3/STAT5A/TLR2/TRADD/CSN

CL11/IKBKG/LBP/TRAF3/FADD/TLR5/TLR2/CASP8/IFNAR2/CCL3L3/IRF5/CXCL10/TLR7/PIK3CB

/CASP1/CD209/IL1B/NRAS/MAP3K14/MRAS/CLEC7A/MAPK11/IKBKG/CALM2/PLK3/NFATC4/BCL10

8A1/AOX1/EHHADH/CYP1A2

5/ACADL/ACSL1/ACADSB/ALDH2/ADH6/EHHADH/ADH1A/ADH1C/CYP4A11/ADH4/ADH1B  
3CD/CDK2/ANAPC11/STK10/MAPK11/IGF1R/HSP90AA1/GNAI3/ADCY6/ANAPC5/KIF22/ADCY5/CDC

KR1D1/CYP1A2/HSD11B1/HSD17B6/CYP2E1/CYP3A4  
7B6/ADH1A/CYP2B6/ADH1C/CYP4A11/CYP2C9/CYP2C8/ADH4/ADH1B/CYP2A6/CYP3A4  
A1/APOC3

E/ADAR/POLR3F/AIM2/POLR1C/RELA/POLR3A/IKBKB/ZBP1  
ATP6V0E1/ERO1A/ATP6V0D1/CFTR/ARF1/ADCY3/ATP6V1B2/PDIA4/PLCG1/GNAS  
CAA2/ALDH7A1/ACADSB/ALDH2/AGXT2/ALDH6A1/ABAT/AOX1/EHHADH/HMGCS2  
XCL3/IL1B/LCK/TNFSF13B/PARP1/MAP3K14/BTK/LTBR/IKBKG/LBP/TRAF3/TRIM25/VCAM1/PIDD  
L9/CCR1/CXCR3/XCL2/IL2RB/CCL3/LTBR/CXCL11/CCR5/PF4V1  
MB/SELPLG/HLA-DPB1/CFD/FPR1/C3AR1/KRT18/HLA-DQA2/FPR3/C5AR1/HLA-DRB5  
AP1/FZD1/HIF1A/MMP2/SLC9A1/MAP2K2/MAPK3/CD63/RRAS/PAK1/FGFR1/HCLS1/PIK3CD/ACTG1

/ACSL1/ACADSB/EHHADH  
T2B10/CYP1A2/FMO3/ADH1A/CYP2B6/CYP2E1/ADH1C/CYP2C9/CYP2C8/ADH4/ADH1B/CYP2A6/CYP  
AS/LCK/PTPN6/GRB2/CD48/GZMB/FCGR3B/IFNAR2/CD247/HLA-C/ICAM2/PIK3CB/CASP3/ITGAL/  
IL12RB1/TGFB3/IL4R/TLR5/HLA-DOA/TLR2  
  
1/UGT2B10/CYP1A2/HSD11B1/SULT2A1/ADH1A/CYP2B6/CYP2E1/ADH1C/CYP2C9/ADH4/ADH1B/CY  
AK2/VEGFA/RAPGEF1/EGLN2  
YP1A1/GSTM1/UGT2B15/ADH6/GSTA1/UGT2B10/CYP1A2/HSD11B1/SULT2A1/ADH1A/CYP2E1/ADH1  
O1/MAD2L2/FBXO5/ANAPC7/YWHAH/CDK2/PPP1CA/PPP1CC/YWHAQ/ANAPC11/YWHAB/MAPK11/IGF1  
E1/CYP2A6/CYP3A4  
  
LC27A2/PCK2/EHHADH/FABP4/CYP7A1/APOA1/APOA5/HMGCS2/APOC3/CYP4A11/SLC27A5/PCK1/C  
F4/GSPT2/CPSF3/MSI1/PPP2R3A/SYMPK/ETF1/MAGOH/PPP2R5B/RNMT/FIP1L1/SSU72/MAGOH/N  
A/IL27RA/MAPK3/HSP90AB1/STAT1/HLA-DQA2/HLA-DRB5/IL1B/IL2RA/LCK/IL12RB1/IL2RB/MA  
SLC01B1/ABCB4/CYP7A1/SLC22A7/UGT2B10/SULT2A1/SLC22A1/SLC27A5/AQP9/SLC10A1/CYP3A  
AS/PDGFA  
  
B4/ACOX1/PXMP2/ACSL6/AMACR/PECR/PHYH/SCP2/ACSL5/ACSL1/CAT/BAAT/EPHX2/ACOX2/XDH/  
1/NUPR1/ETV7/TFE3/HDAC2/MITF/PDGFA/MLF1/CDKN2C/CCND2/ETV6/PRCC/IL1R2/IL2RB/PAX8  
/SELPLG/HLA-DPB1/CD2/HLA-A/CD276/NRCAM/CTLA4/CD58/HLA-DQA2/CNTNAP1/HLA-B/HLA-DR  
R1/ACTB/CDC42/MAPK11/VCL/VCAM1/CLDN10/MYL9/SIPA1/CTNNA1/PTK2/GNAI3  
L2/MASP1/C8B/F11/F2/F7/SERPINF2/F13B/MASP2/C4BPA/CPB2/KLKB1/C8A/CFHR3/SERPIND1/  
B1/CACNB3/SLC9A6/COX7A2/CACNA1D/COX6C/ATP2A2/COX5A/TNNC1/COX4I1  
/PRF1/HLA-DOB/IFNG/HLA-E/CD80/IL12A/FASLG/HLA-G  
A4/HRAS/CSF1R/PGF/CDK4/CSF3R/G6PC3/AREG/CREB3L1/COMP/LAMC1/JAK3/ITGA5/RELN/EFNA  
TGA2/COL4A2/LAMB3/E2F2/CYCS/ZBTB17/IKBK/ TRAF3/ TRAF4/LAMA4/PTK2/CCNE2  
T1/E2F3/STAT1/IRF3/LYN/IRF7/PIK3CD/LEF1/GNG5/GNB2/HLA-B/CXCL3/RAC1/GNB1/BID/NRA  
A/E2F3/STAT1/IRF3/IRF7/PIK3CD/CDK2/ATF4/TGFB2/BID/NRAS/YWHAQ/E2F2/CYCS/GRB2/TGF  
FPT1/CYB5R3/PMM2  
/VDAC1/BID/IL1B/CAPN1/MLKL/CHMP3/PARP1/DNM1L/CHMP1A/PGAM5/SLC25A5/FADD/VDAC2/HS  
PCK1  
  
CTG1/AXIN1/BBC3/LEF1/FZD2/WNT7B/PPP1CA/TGFB2/PPP1CC/ACTB/YWHAQ/RASSF1/CCND2/DVL  
/PIK3CD/SHC1/ATF4/GNG5/GNB2/GNB1/NRAS/COL4A2/GRB2/MAPK11/ARRB2/GNB4/GNGT2/PLCB2  
B2/ATP2B1  
PK3/HK3/PIK3CD/LDHA/PFKM/HK1/LTBR/IGF1R/LDHB/ANGPT2/RBX1  
  
PT/ENO3/PKLR/CAT/OGDHL/RGN/ALDH6A1/FBP1/EHHADH/HAO2/HAO1/CPS1/AGXT/ALDOB  
BA1/PML/CUL4B/RBX1/CBL/RNF7/UBE20/UBE2L6/VHL/TRIM37/UBA2/PRPF19/RPS27A/UBE2D2/P  
  
PK3/LMNA/CTSS/PMAIP1/PIK3CD/ACTG1/BBC3/ATF4/BID/CAPN1/NRAS/ACTB/PARP1/CYCS/MAP3

PJ/CTBP1/NOTCH2/NCSTN/MAML1/APH1A/DVL1/MAML2  
6A1/CPA2/COL6A2/COL4A2/COL8A2/SLC36A4/COL11A1/PRSS3/KCNN4/ATP1B1  
S1/CHEK2/CCND3/PIDD1  
K3CD/TGFA/SHC1/ATF4/NRAS/GRB2/KRT20/CTSD/PLCB2/KRT10/CALM2/HSP90AA1/GNAI3/HSP90

S6KB2/TLR2/CSNK2B/CSNK2A1/CD247/NFKBIB/CD4/EGF/CSNK2A2/CD3G/PIK3CB/IFNG/PLCG1/R

3/HLA-DMB/TRAF2/CCL5/ITGA5/HLA-DPB1/BAX/ZNF320/CARD9/HLA-A/TRAF5/PILRA/ZNF93/ST  
BCL2L1/CSNK2A2/MFN1/ATG9A/ULK1/TP53/RELA/TFEB/RAB7A/MAPK9/KRAS/SP1/GABARAP/RRAS  
D2/PLCB3/ASAHI/PIK3CD/RAC1/BID/NRAS/MAPK11/CTSD/CERS6/PLCB2/PPP2R3A/TRADD/PLD2/



MC2/ATP6V1C1/ISG15/FZD1/HLA-A/TCIRG1/ATP6VOD2/PPP2R1A/LAMA5/MAP2K2/ATP6AP1/MAPK  
CB3/POLR2H/SLC1A3/DCTN2/TUBB4A/BBC3/ATG101/PSMB4/ADRM1/VDAC1/TGM2/PSMA5/PSMC4/T  
IRF3/PLCB3/HCLS1/CYTH2/CBX3/PIK3CD/ACTG1/ARPC5L/CASP1/CAPNS1/VDAC1/RAC1/BCAR1/I  
3/ARPC2/DYNLRB1/PAK1/PLEKHM2/NCKAP1L/DYNLT1/CYTH2/CSE1L/STX10/PIK3CD/ACTG1/ARPC  
EB3/PSMD2/TUBA1A/CYC1/MAPK3/TUBB6/KLC3/TUBB2A/PSMB2/MCU/PIK3CD/TUBB4A/ATF4/PSME  
LA-DMB/TCF3/JAK3/HLA-DPB1/BAX/ESPL1/NFKB2/CREB3/CD3E/HLA-A/MAP2K2/MAPK3/E2F3/HL  
BP1/BIN1/ARFGAP1/CAPZA1/ARPC5L/SNF8/RAB11FIP4/EHD1/HLA-B/IL2RA/FOLR2/SH3GLB2/RA  
/ARPC2/PAK1/PIP5K1C/NCKAP1L/FGFR1/PAK4/PIK3CD/ACTG1/ARPC5L/ITGB5/PPP1CA/RAC1/BC  
LA-B/RAC1/GNB1/BID/APOBEC3G/NRAS/CYCS/CALR/MAPK11/CCR5/IKBKG/AP1G2/GNB4/CUL4B/F  
-A/TRAF5/HDAC1/E2F3/STAT1/CD58/IRF3/HDAC2/LYN/HLA-DQA2/IRF7/PIK3CD/CDK2/SAP30/A  
1/ABCF2/TUBB2A/ARPC3/ARPC2/PAK1/NCKAP1L/HCLS1/CYTH2/MYO1F/MYO1G/SLC9A3R1/ACTG1/  
/CASP1/IFI16/VDAC1/CXCL3/IL1B/TXN/CARD16/DNM1L/GSDMD/MAPK11/IKBKG/TRAF3/CARD18/  
CIRG1/ATP6VOD2/ATP6AP1/MAPK3/RFXANK/STAT1/CTSS/ATP6V1H/HLA-DQA2/CD209/TGFB2/HLA  
P1/PIK3CD/CDK2/ATF4/HLA-B/RAC1/NRAS/YWHAQ/CCND2/CHD4/GRB2/CDC42/YWHAB/KAT2A/LTE  
/MCU/PIK3CD/CDK2/PPP1CA/TGFB2/HLA-B/VDAC1/PPP1CC/CAPN1/NRAS/CCND2/RBBP4/E2F2/TG  
L2/CASP1/VDAC1/HLA-DRB5/BID/IL1B/ACTB/CYCS/RAE1/PML/IKBKG/SLC25A5/TRAF3/CPSF4/T  
IF/SOCS1/HDAC2/DDIT4/PAK4/PIK3CD/SHC1/TNC/TGFB2/NRAS/DNMT3A/PDGFA/FGFR3/RASSF1/C  
IOC5/EIF2S3/XPO5/RAE1/PABPC4/EIF3H/NUP107/NUP155/FUS/POP5/EIF2B5/SEC13/MAGOH/THC  
LA-DPB1/COLEC12/SEC61A1/SEC61G/ATP6V1C1/HLA-A/TUBA1A/TCIRG1/ATP6VOD2/ATP6AP1/RA  
/FUS/HNRNPM/HNRNPA3/RBM17/SNRPG/PRPF31/DDX23/SART1/SNRPB2/PRPF19/PRPF38A/HNRNPU  
.1/PRKDC/PCNA/MAD2L2/HDAC1/E2F3/RBL1/E2F4/HDAC2/DBF4/CDKN2B/ANAPC7/YWHAH/CDK2/TG  
/MRPS21/RPS23/RPS15/MRPL18/RPS12/RPS16/RPL7A/RPL36/RPS27A/RPL6/RPS7/RPL22L1/RPL  
RAC1/IL1B/LCK/GRB2/MAP3K14/BTK/MAPK11/IKBKG/LILRB4/FCGR3B  
/ATP6VOC/PLA2G15/AP1G2/CTSD/AP3D1/M6PR/AP1B1/NAGPA/SGSH/DNASE2/ATP6VOD1/AGA/MAN

IFRSF11A/CTLA4/ATP6V1H/HLA-DQA2/CCL2/TGFB2/CXCL3/HLA-DRB5/IL1B/ATP6V1E1/IL15/TNF  
/ARPC5/INPPL1/FCGR2B/DNM2/PLD2  
RPP30/EIF6/CSNK2A2/IMP4/RIOK1/AK6/NXT2  
1B/PTPN6/TGFB3/MAPK11  
1/HLA-F/CANX/HSPA2/TAPBP/LGMN/TAP2/PDIA3/CD4/HLA-C/NFYA/HLA-DOB/IFNG/CTSL/HLA-E  
2/ELMO3/PXN

/ARNT2/MMP1/FZD7/LAMC1/TRAF2/GSTM3/JAK3/CXCR4/BDKRB1/HMOX1/BAX/NFKB2/LAMC2/TPM3  
/CSNK1E/FRAT2/PSENEN/PLCB3/DVL3/MCU/PIK3CD/AXIN1/TUBB4A/ATF4/FZD2/ATG101/WNT7B/  
NUP37/NDC1/GPX7/NXT1/NUP205/NUP188/DCTN2/MCU/ACTG1/TUBB4A/ATF4/CASP1/ATG101/PSM  
/CXCL13/CCL13/CCL4/CCL2/CXCL16/CCL28/TGFB2/CXCL3/IL1B/TNFRSF10C/IL2RA/CXCL9/CCF  
SMD13/TXN/PSMD11/UBE2L3/CYCS/PSMA7/PSMD1/UBA1/PSMD7/PSMB3/PSMD4/NDUFS6/PSMD3/SL  
TRAF3/FADD  
3/CYCS/TGFB3/MAPK11/CCR5/IKBKG/IL10RA/LAMA4/HLA-DOA/CIITA/TLR2/GNAI3/HSPA2/CASF  
/STAT5A/NOTCH3/NOTCH1/RUNX3/CD247/NFKB1B/CD4/RBPJ/CD3G/NOTCH2/HLA-DOB/IFNG/PLCG  
/ANAPC5/IL17D/IL17RA/CXCL10/SRSF1/CASP3/MAP3K7/IL17RB/IFNG/ELAVL1/MAPK15/RELA  
3/HLA-DOA

HLA-B/RAC1/BCAR1/GNB1/BID/IL1B/NRAS/CCR1/E2F2/CYCS/CALR/GRB2/CCL3/MAPK11/CCR5/  
ACTB/PDGFA/FGFR3/PFN1/RALA/SIPA1L2/CDC42/PRKCI/SIPA1L3/MRAS/PRKD2/MAPK11/IGF1R  
B1/CXCL9/NRAS/FGR/CCR1/WAS/CXCR3/GSK3A/XCL2/GRB2/CDC42/CCL3/CXCL11/CCR5/IKBKG/F  
2/PLCD4/STAT5A

1CA/RAC1/BCAR1/PPP1CC/ACTB/ITGA2/PDGFA/COL6A2/COL4A2/CCND2/LAMB3/PARVG/GRB2/CDC  
CALR/PPP1R15A/DNAJB11/ERO1A/PDIA6/RBX1/HSPA4L/SSR4/VCP/SEC13/UBXN1/HSPA5/HSP90A  
/IKBKG

PRF1/HLA-DOB/EIF4G1/HLA-E/RAC3/CD80/LAMA1

K2B/CCNE2/HSPA2/MAVS/CSNK2A1/OAS3/CASP8/BAD/TNFAIP3/IFNAR2/NFKBIB/BCL2L1/TLR7/F  
MAP3K7/TLR8

KSR1/CASP8/RHOA

27/ADCY3/ANAPC4/ADCY7/PIK3CB

1/TRADD/BCL10/CSNK2B/CSNK2A1/PIAS4/TNFAIP3

ITGB5/FZD2/WNT7B/PPP1CA/TGFB2/RAC1/PPP1CC/NRAS/ACTB/ITGA2/PTPN6/CTTN/TFAP4/GRE

'3A4

'PRF1/IFNG/PLCG1/HLA-E/RAC3/PRKCB/NFATC1/VAV3/TNFRSF10A/PIK3R2/MICB/KRAS/FASLG/F

P2A6/CYP3A4

C/CYP2C9/CYP2C8/ADH4/ADH1B/CYP2A6/CYP3A4  
R

.YP8B1

XT2/RBM8A/PABPC1L/SMG7/PABPN1/CASC3/CSTF3/PYM1/ACIN1/PPP1CB/PPP2R3B/PPP2R5D/PPF

.PK11/IKBKG/IL4R/HLA-DOA/HSP90AA1/STAT5A  
.4

'SLC27A2/PIPOX/EHHADH/HAO2/DAO/HAO1/AGXT  
:/PML/ZBTB17/IGF1R/FUS/GZMB  
B5/PDCD1/SIGLEC1/CD6/CD8A/ITGB8/GLG1/VCAM1/CLDN10/PTPRF/HLA-DOA/HLA-F

'F12/F9/CFHR5/KNG1/C6/PLG/CFHR4/SERPINC1

.5/CREB3/LAMC2/PPP2R1A/LAMA5/MAP2K2/MAPK3/HSP90AB1/GNGT1/BRCA1/PPP2R2C/FGFR4/FGF

.S/CCR1/E2F2/CYCS/MAPK11/CCR5/IKBKG/TRAF3/GNB4/FADD/ANGPT2/GNGT2/CALM2/HLA-F/NFA  
B3/YWHAB/MAPK11/IKBKG/TRAF3/FADD/STAT5A/TLR2/NFATC4/VDAC3/CCNE2/MAVS/CASP8/BAD

.P90AA1/STAT5A/TRADD/VDAC3/USP21/CASP8/TNFAIP3/IFNAR2/FAF1/PLA2G4A/SPATA2L/CAPN2

.2/TGFB3/YWHAB/PRKCI/PARD6B/LLGL1/PARD6G/WWC1/WNT4/NF2/CCND3

;

'TAS4/UBE2Q1/ANAPC5/UBA52/UBE2N/UBR5/UBE2E2/UBE2F/CDC27/STUB1/MAP3K1/UBE4B/ANAPC

K14/IKBKG/GZMB/CTSD/DFFA/FADD/CSF2RB

B1/HSPA2/ADCY6/ADCY5/CALM3/HBEGF/ADCY3/KRT15/ADCY7/PIK3CB

ELA/NFATC1/IKBKB/RASGRP1/PIK3R2/STAT3/CD274/TICAM1/KRAS/PPP3CB/MAP3K3/ZAP70

AT1/IRF3/HLA-DQA2/IRF7/SOCS3/PIK3CD/CCL2/SRSF9/PPP1CA/HCFC1/HLA-B/HLA-DRB5/PPP1  
2/ATG9B  
GNAI3/S1PR3/PPP2R5B

3/HDAC1/PPP2R2C/RBL1/STAT1/IRF1/ATP6V1H/IRF3/HDAC2/COL6A3/DVL3/HEYL/BCAP31/SLC9  
CTN5/TUBB2B/PSMD13/PSMD11/CLTB/AP2M1/CYCS/PSMA7/AP2S1/PSMD1/PSMD7/POLR2K/PSMB3/  
L1B/CAPN1/ACTB/UBE2D1/WASF1/GSK3A/PFN1/CYCS/CTTN/HK1/CDC42/MAPK11/IKBKG/VCL/AKT  
5L/LEF1/CASP1/RAC1/IL1B/MLKL/ACTB/TXN/DYNC1LI1/PFN1/CYCS/FHOD1/RALA/RPS3/GSDMD/  
4/ADRM1/VDAC1/RAC1/PSMA5/IL1B/PSMC4/TUBB2B/PSMD13/PSMD11/CYCS/PSMA7/PSMD1/PSMD7  
A-DQA2/CDKN2B/ANAPC7/PIK3CD/CDK2/ATF4/TGFB2/HLA-B/VDAC1/HLA-DRB5/IL2RA/NRAS/LCK  
B10/EHD2/FGFR3/ARF4/CHMP3/CLTB/AP2M1/EPS15L1/IL2RB/AP2S1/VPS28/CHMP1A/CDC42/PML  
AR1/PPP1CC/PIP4K2A/NRAS/ACTB/ITGA2/PDGFA/FGFR3/WASF1/PFN1/PIP4K2C/CDC42/MRAS/IT  
ADD/RBX1/AP1B1/APOBEC3D/RNF7/GNGT2/RPS6KB2/CALM2/HLA-F/TLR2/NFATC4/TRADD/PTK2/C  
DRM1/HLA-B/RAC1/HLA-DRB5/BID/PSMC4/PSMD13/CCND2/PSMD11/E2F2/CYCS/PSMD1/CALR/MAF  
ARPC5L/TUBB4A/CASP1/RAC1/IL1B/TUBB2B/ACTB/WASF1/PTPN6/CYCS/CTTN/RPS3/NCL/CDC42/  
FADD/CARD6/TRIP6/VDAC2/PLCB2/HSP90AA1/VDAC3/MAVS/OAS3/CASP8/TNFAIP3/RHOA/IFNAR2  
-DRB5/BID/IL1B/RFX5/CYCS/ATP6VOC/TGFB3/CLEC7A/MAPK11/LBP/CTSD/NFYC/FADD/FCGR3B/  
R/RANBP1/CCR5/IKBKG/TRAF3/ATP6VOD1/CCND3/HLA-F/STAT5A/TRADD/VDAC3/CCNE2/GTF2E2/  
FB3/MRAS/MAPK11/SLC25A5/CHEK2/VDAC2/RHEB/CCND3/RAD9A/CALM2/HLA-F/NBN/RAD1/NFATC  
RIM25/FADD/PRSS3/CCND3/HLA-DOA/CIITA/TRADD/MAVS/OAS3/RAB11A/CASP8/IFNAR2/KPNA6/  
CND2/E2F2/GRB2/VIM  
C2/TGS1/EIF3E/STRAP/EIF3G/RPP30/SEH1L/MAGOH/THOC1/SUMO2/EIF4G3/EIF4G2/NXT2/RBM  
B7B/TUBB6/HGS/TUBB2A/DYNC1H1/CTSS/MSR1/OLR1/ATP6V1H/HLA-DQA2/ACTG1/TUBB4A/ITGB5  
I/LSM8/RBMX/HSPA2/MAGOH/PHF5A/THOC2/TCERG1/DHX15/HNRNPA1/SF3B3/PPIE/USP39/SF3B2/  
FB2/CDKN2C/YWHAQ/CCND2/ANAPC11/E2F2/CDK7/RAD21/TGFB3/YWHAB/ZBTB17  
.37/MRPS17/MRPL15/MRPL28/RPL27A/RPS11/RPS4X/RPL19/RPLP1/MRPL27/UBA52/RPL13A/RPL5  
2B1/ABCA2/PSAP/GNPTAB/HEXB/CTSW/AP3B1/SLC17A5/CLTC/GGA1/GGA3/ABCB9/AP1S3/AP1S2/  
SF13B/ATP6VOC/TGFB3/CCL3/ATP6V0E1

;

;/FZD1/TRAF5/HIF1A/MMP2/LAMA5/MAP2K2/MAPK3/HSP90AB1/GNGT1/CKS1B/HDAC1/GNA12/E2F2  
PSMB4/ADRM1/VDAC1/BID/PSMA5/IL1B/CAPN1/PSMC4/TUBB2B/NRAS/RTN3/CDK5/PSMD13/APP/F  
IB4/ANXA11/ATXN2L/ADRM1/VDAC1/RAC1/BID/PSMA5/PSMC4/DCTN5/TUBB2B/ACTB/NUP85/PSMD1  
1/TNFSF12/IL15/CD27/TNFSF13B/CXCR3/IL12RB1/XCL2/IL1R2/IL2RB/TGFB3/CCL3/LTBR/CXC  
.C25A5/NDUFS5/NDUFB9/COX6B1/MAPT/PSMD9/PSMD8/VDAC2/UBE2L6/PSMA1/COX8A/CALM2/HSPA  
8/BAD/PIK3R5  
1/RELA/STAT4/NFATC1/IKBKB/MAML1/MAML2/MAPK9/IL12A/PPP3CB/GATA3/ZAP70

'IKBKG/GNB4/FADD/IL10RA/GNGT2/RPS6KB2/RHEB/PLCB2/CALM2/HLA-F/NFATC4/TRADD/PTK2/C  
!'/PARD6B/PARD6G/ANGPT2/RALGDS/THBS1/RALB/PLCB2/LPAR5/CALM2/SIPA1/GNAI3/FGFR2/TLN  
'F4V1/ARRB2/GNB4/GRK2/GNGT2/PLCB2/PTK2/GNAI3/GNG4/CXCR6/BAD/PIK3R5/ADCY6/RHOA/DC

:42/IBSP/IGF1R/ITGB8/VCL/THBS1/THBS2/CCND3/LAMA4/MYL9/PTK2/TLN1/PPP1R12C/BAD/PAK  
A1/ERP29/UBQLN4/NSFL1C/CANX/HSP90B1/HSPA2/EDEM2/UBE2D2/DAD1/SSR1/PDIA3/TRAM1/S1

:AB9A/CSNK2A2/MX1/CD3G/PIK3CB/CASP3/MAP3K7

:2/CDC42/LUM/MRAS/MAPK11/DROSHA/IGF1R/HPSE/CBL/THBS1/WNT4/RPS6KB2

'PP3CB/SH2D1A/HLA-G/ZAP70

'2CA/GSPT1/DDX19A/TARDBP

'R1/COL6A3/MLST8/GYS1/DDIT4/YWHAH/PIK3CD/CDK2/TGFA/TNC/ITGB5/ATF4/GNG5/GNB2/RAC1

TC4/TRADD/RPS27A/GNG4/CASP8/PIK3R5/IFNAR2/VEGFA/UBA52/BECN1/CLEC2B/PIK3R6

!/VPS4A

:4/RHOBTB2/HUWE1/CDC34/SKP2/DDB1/TRIM32/CDC23/UBE2E3/CUL7/WWP2/SKP1/UBE2J1/UBE2F

.CC/BID/IL1B/ZNF14/ZNF205/CYCS/CALR/PML/ZNF611/IKBKG/ZNF486/TRAF3/SRPK1/ZNF600/F



1A3R1/PIK3CD/AXIN1/CDK2/TNC/ITGB5/FZD2/WNT7B/HLA-B/NRAS/ATP6V1E1/ITGA2/COL6A2/J/
 'GPX1/PSMD4/NDUFS6/PSMD3/SLC25A5/POLR2L/NDUFS5/NDUFB9/DNAL4/WIPI1/COX6B1/PSMD9/I
 '1S1/RBX1/WIPI1/TLR5/RPS6KB2/ARPC1A/ARPC5/PLCB2/TNIP1/PLCD4/MYL9/TRADD/PTK2/BCL1
 'CDC42/MAPK11/IKBKG/FADD/M6PR/VPS18/TLR5/ARPC1A/ARPC5/HSP90AA1/MYL9/TLR2/DNM2/TF
 'PSMB3/PSMD4/NDUFS6/MAPK11/PSMD3/SLC25A5/NDUFS5/NDUFB9/COX6B1/PSMD9/PSMD8/VDAC2
 'CDKN2C/IL15/CCND2/ANAPC11/E2F2/IL1R2/IL2RB/CALR/MAP3K14/TGFB3/KAT2A/LTBR/RANBF
 ./CAPZB/PRKCI/AGAP1/SH3GL1/CCR5/VPS25/ARRB2/IGF1R/PARD6B/PARD6G/CBL/MVB12A/SNX12
 'GB8/VCL/FGD1/ABI2/ARPC1A/ARPC5/LPAR5/MYL9/PTK2/BRK1/FGFR2/SSH2
 'NAI3/GNG4/CASP8/BAD/AP1S3/AP1S2/PAK2/TAPBP/CD247/AP1S1/TAP2/PDIA3/CD4/BCL2L1/A1
 '3K14/PSMD7/VIM/BTK/PSMD4/MAPK11/IKBKG/PSMD3/TRAF3/FADD/NCOR2/PSMD8/CCND3/HLA-DC
 'MAPK11/IKBKG/MYO5A/FADD/TLR5/CLDN10/ARPC1A/ARPC5/LPAR5/TRADD/BRK1/ABL1/MYO6/TUF
 ?
 'HSPD1/IL10RA/ATP6VOD1/FCGR2B/HLA-DOA/CIITA/CALM2/VDR/TLR2/PLK3/TRADD/BCL10/RABF
 'YWHAG/HDAC10/SRF/CASP8/BAD/VAC14/RHOA/ACTN1/TBP/ACTN4/GTF2H1/SND1/RBPJ/HDAC8/HI
 '4/VDAC3/CCNE2
 'NFKB1B/CXCL10/TLR7/MX1/NXT2/PIK3CB/CASP3/PABPN1/HNRNPUL1/FDPS/HLA-DOB/ADAR/IFN
 18A/PABPC1L/EIF2B1/GEMIN2/CASC3/THOC7/EIF2B4/EIF3F/DDX20/AAAS/PYM1/THOC3/ACIN1/I
 '5/CD209/HLA-B/RAC1/HLA-DRB5/TUBB2B/ACTB/ATP6V1E1/ITGA2/DYNC1LI1/ATP6VOC/CALR/CLF
 'SRSF2/MAGOH/THOC1/SRSF1/PRPF4/DHX38/PRPF38B/SF3B6/RBM8A/SNRNP70/DHX8/RP9/SNRNP
 37A/MRPL4/RPL30/RPL32/MRPL33/MRPS5/RPS27/MRPL36/RPL13/RPS9/RPL41/RPS14/MRPL11/RI
 'LGMN/AP1S1/MANBA

3/FGFR4/PIM2/STAT1/FRAT2/HDAC2/PLCB3/FGFR1/PPARD/MITF/DVL3/DAPK3/CDKN2B/HEYL/PM/
 'PSMD11/CYCS/PSMA7/DVL2/PSMD1/PSMD7/PSMB3/PSMD4/NDUFS6/PSMD3/SLC25A5/APH1B/NDUFS5
 .3/NUP43/PSMD11/PFN1/CYCS/PSMA7/RAE1/PSMD1/PSMD7/PSMB3/GPX1/PSMD4/TOMM40L/NDUFS6
 'L11/CCR5/PF4V1/CXCL17/IL4R/CSF2RB/CSF2RA/IL10RA/INHA/GDF11/TNFRSF25/IL20RB/CXCF
 15/PSMA4/VDAC3/RPS27A/GNAI3/PSMB5/NDUFB3/TUBB3/COX7B/DAXX/PSMC5/NDUFA8/UBA52/UQC

NAI3/PTGER4/GNG4/CASP8/ARHGEF11/ADCY6/RHOA/TAPBP/VEGFA/CCL3L3/TAP2/ADCY5/PDIA3/  
I1/ADCY6/RHOA/VEGFA/KITLG/RAPGEF1/ADORA2B/ADCY5/PARD3/EPHA2/EGF/RASSF5/CALM3/AD  
CK2/CCL3L3/PIK3R6/XCL1/ADCY5/PARD3/NFKBIB/CXCL10/CCL8/PREX1/ADCY3/CCR10/ADCY7/I

2/RHOA/VEGFA/RAPGEF1/ACTN1/ACTN4  
UB1/UBE4B/CAPN2/P4HB/DNAJC1/LMAN2/PDIA4/ATF6B/SEC23B/FBX06/RPN1/UGGT1/SVIP/UBQI

./GNB1/IL2RA/NRAS/ITGA2/PDGFA/COL6A2/FGFR3/YWHAQ/COL4A2/CCND2/LAMB3/IL2RB/GRB2/

2/UBE2K/CDC16/RHOBTB1/ANAPC1/TRIP12/SMURF2/MID1/CDC26/FANCL/UBA3/FBXW11/CUL2/UF

ADD/ZNF589/ZNF544/ZNF195/ZNF354A/ZNF675/ZNF229/EIF2B5/RHEB/ZNF783/HLA-DOA/HLA-I

AG1/COL4A2/CCND2/LAMB3/ATP6V0C/DVL2/CHD4/GRB2/TUBG2/CDC42/PRKCI/ATP6V0E1/IKBKG/  
PSMD8/VDAC2/PLCB2/PSMA1/COX8A/PSMA4/VDAC3/PSMB5/NDUFB3/TUBB3/DCTN1/COX7B/CLTC/C  
LO/RPS27A/TLN1/UBE2D2/GLMN/RHOA/UBA52/UBE2N/TECPR1/ACTN1/BECN1/ACTN4/ARF1/NFKBII  
RADD/BRK1/RAB5C/MYO6/HSP90B1/DYNC1I2/CASP8/RHOA/AHNAK2/VPS11/ARF1/PTPRC/VPS33A/I  
2/PSMA1/COX8A/HSPA5/PSMA4/VDAC3/CSNK2B/PSMB5/HSPA2/NDUFB3/TUBB3/NOTCH1/CSNK2A1/C  
P1/IKBKG/SLC25A5/MSX1/CHEK2/VDAC2/CCND3/HLA-D0A/HLA-F/STAT5A/NFATC4/VDAC3/CANX/C  
2/GRK2/ARPC1A/ARPC5/SH3GLB1/HLA-F/ARAP1/RUFY1/VPS45/VPS35/SMAP1/DNM2/PLD2/RAB5C,

TR/CALM3/CD3G/HLA-C/TNFRSF1B/PIK3CB/CASP3/MAP3K7/DDB1/PXN/GNG2/PLCG1/HLA-E/RELA,  
A/HLA-F/TLR2/TRADD/CCNE2/MAVS/OAS3/CASP8/TNFAIP3/PSMC5/IFNAR2/TAPBP/RUNX3/PSMC  
3B3/CASP8/ARHGEF11/PAK2/RHOA

5C/KSR1/CASP8/BAD/RHOA/CYP27B1  
A-C/PIK3CB/CASP3/SKP2/GTF2A2/EGR2/ATF6B/DDB1/GTF2E1/CCR3/PXN/TP53/HDAC5/HLA-E/I

3/PRSS1/RELA/PRKCB

PRMT5/SUMO3/EIF2B3/EIF4E2/EIF4G1/FXR1/EIF2B2/GEMIN8/PAIP1/EIF3C/EIF5B/GEMIN6/EII  
C7A/STX18/ATP6V0E1/FCGR3B/M6PR/THBS1/STX7/ATP6V0D1/THBS2/FCGR2B/HLA-D0A/HLA-F/  
P200/U2SURP/THOC3/ACIN1/HNRNPC/RBM22/SRSF3/SNRPD3/U2AF1L4/CCDC12/LSM3/TRA2B/HSP

L29/RPS3A/RPS6/MRPL14/RPS24/RPL10/RPL9/RPL4/MRPL3/RPL14/MRPS16/RPL24/RPL11/MRPI

AIP1/PIK3CD/AXIN1/CDK2/TGFA/BBC3/LEF1/BIRC7/FZD2/GNG5/WNT7B/JAG2/GNB2/TGFB2/RAC  
5/FADD/NDUFB9/NAE1/WIPI1/ATP2A3/COX6B1/MAPT/PSMD9/WNT4/PSMD8/VDAC2/PLCB2/PSMA1/C  
3/NUP107/NUP155/MAPK11/PSMD3/FUS/NDUFS5/NDUFB9/DNAL4/HNRNPA3/WIPI1/COX6B1/PSMD9,  
R6/ACVR1/IL21R/IFNAR2/GDF10/CCL3L3/IL17D/IL20RA/ACVR1B/XCL1/IL32/OSM/CD4/IL17RA,  
RB/NDUFA1/PSMC3/NDUFA13/NDUFS8/ADCY5/COX7A2/BCL2L1/COX6C/PSMB1/CALM3/MFN1/NDUF

/CALM3/ADCY3/GNA13/HLA-C/ADCY7/PIK3CB/CASP3/ATF6B/CCR3/PXN/TP53/GNG2/GNAS/HLA-E,  
Y3  
PIK3CB/CCL19/CCR3/PXN/GNG2/PLCG1/RELA/RAC3/PRKCB/ARRB1/CCR2/VAV3/IKBKB

N2/PRKCSH/MOGS/DERL1/SKP1/DERL3/UBE2J1/EIF2AK1/RAD23A/UGGT2

ITCP1/PKN3/YWHAB/IKBK/IBSP/IGF1R/IL4R/GNB4/ITGB8/ANGPT2/THBS1/GNGT2/RPS6KB2/THI

3C/XIAP/KEAP1/UBE2W/SMURF1/UBE3C/PIAS2/ANAPC13/ANAPC2/NEDD4L/UBOX5/CBLB/ERCC8/UI

3/TLR2/ZNF605/ZNF426/TRADD/MAVS/ZNF607/ZNF746/OAS3/ZNF7/ZNF623/CASP8/DAXX/BAD/II



IBSP/HEY1/TRAF3/PARD6B/ITGB8/LLGL1/PARD6G/FADD/THBS1/WNT4/RPS6KB2/MFNG/ATP6VOD1,  
ASP8/MAP3K10/PSMC5/NDUFA8/POLR2I/UQCRB/NDUFA1/PSMC3/POLR2D/NDUFA13/BECN1/NRF1/TI  
3/BCL2L1/ELMO2/RPTOR/CYTH3/CAPN2/FNBP1L  
ELMO2/CYTH3/RAB9A/ACBD3/KLC1/PIK3CB/CASP3/MAP3K7/VPS16/NCKAP1/CASP7/KPNA4/RHOH/I  
COX7B/BAD/PSMC5/NDUFA8/GRIN2D/UQCRB/NDUFA1/PSMC3/NDUFA13/NDUFS8/COX7A2/CACNA1D/C  
CNE2/TLN1/SRF/VAC14/ADCY6/ANAPC5/TBP/ADCY5/CRTC2/CD4/CDC27/BCL2L1/ATR/RANBP3/M  
/FGFR2/HSPA2/ACAP3/CLTC/RAB11A/RHOA/ARF1/AP2A2/WIPF2/SNX3/PARD3/ARF5/IST1/AP2B1,  
  
/RAC3/PRKCB/SKP1  
3/CD247/ENTPD1/TAP2/PDIA3/NFKBIB/CXCL10/RBPJ/CD3G/HLA-C/PIK3CB/CASP3/SKP2/MAP3K

RELA

71/NUP214/DDX19A/TARDBP/GEMIN5/RPP38/EIF3J/SMN2/TPR  
FLR2/CANX/RAB5C/DYNC1I2/TUBB3  
A1A/BCAS2/TRA2A/SRSF10/PRPF40A/DDX46/SRSF7/PRPF40B/SRSF4/CWC15  
  
20/RPL10A/RPS18/MRPL21/RPL12/RPS28/MRPL24/RPL26L1/MRPS2/RPL22/RPS17/RPS15A/MRPI

1/GNB1/BID/IL2RA/NRAS/ITGA2/PDGFA/JAG1/IL15/FGFR3/RASSF1/COL4A2/CCND2/LAMB3/IL1:  
COX8A/CALM2/ADAM17/PSMA4/VDAC3/CSNK2B/PSMB5/NDUFB3/TUBB3/CSNK2A1/COX7B/CASP8/BAI  
/PSMD8/VCP/PSMA1/COX8A/SEC13/HSPA5/UBQLN4/PSMA4/PSMB5/FIG4/NDUFB3/TUBB3/DCTN1/C  
/CXCL10/IL13RA2/CCL8/BMP8B/TNFSF15/CRLF2/TNFRSF14/CCR10/BMP2/TNFRSF1B  
A12/COX5A/PSMB6/NDUFB4/KLC1/NDUFA9/CASP3/NDUFB11/PSMA3/COX4I1/KIF5B/HTRA2/TP53/I

/RELA/MYC/RAC3/PRKCB/NFATC1/IL10RB/IKBKB/TSC1/ELK1

3S2/RHEB/CCND3/LPAR5/LAMA4/HSP90AA1/TLR2/PPP2R3A/PTK2/FGFR2/HSP90B1/CCNE2/YWHAG,

ZNFAR2/TAPBP/ZNF415/ZNF404/ZNF813/TAP2/ZNF432/PDIA3/BCL2L1/SRSF2/ZNF251/SRSF1/ZNF

/THBS2/RHEB/CCND3/LAMA4/HLA-F/PPP2R3A/TRADD/PTK2/CCNE2/PTGER4/NOTCH3/NOTCH1/PPP2R3B/NDUFS8/POLR2J/ATG13/AP2A2/HTT/ACTR1A/COX7A2/AP2B1/COX6C/PSMB1/NDUFA12/COX5A/NDUFA13/NDUFB4/NDUFA9/PIK3CB/CASP3/NDUFA10/ATF6B/HLA-C/VPS26A/VPS29/STAM/

DYNC2LI1

COX6C/CSNK2A2/PSMB1/CAV1/NDUFA12/COX5A/PSMB6/NDUFB4/KLC1/NDUFA9/PIK3CB/CASP3/NDUFA10/ATF6B/HLA-C/VPS26A/VPS29/STAM/

7

L22/RPL31/MRPS11

2RB1/E2F2/CYCS/DVL2/MSH2/IL2RB/RALA/GRB2/PAX8/TGFB3/CDC42/PML/ZBTB17/IKBKG/IGF1R/PSMC5/NDUFA8/GRIN2D/UQCRB/NDUFA1/PSMC3/NDUFA13/BECN1/NDUFS8/ATG13/CDK5R1/COX7B/OPTN/DAXX/BAD/PSMC5/HNRNPA1/NDUFA8/GRIN2D/UQCRB/NDUFA1/PSMC3/NDUFA13/BECN1,

PLCG1/PARK7/GNAS/PSMB7



/PPP2R5B/CDC37/GNG4/BAD/PIK3R5/PRKAA2/IFNAR2/VEGFA/KITLG

F282/ZNF43/ZNF74/ZNF480/ZNF256/ZNF300/ZNF124/TNFRSF14/HLA-C/ZNF765/ZNF160/ZNF22:



2R5B/CASP8/BAD/IFNAR2/VEGFA/LFNG  
PSMB6/NDUFB4/KLC1/AP2A1/POLR2E/NDUFA9/POLR2B/CASP3/NDUFB11/PSMA3/COX4I1

UFB11/PSMA3/CAV2/COX4I1/ATF6B  
-DOB  
CAV2/IGF2R/CAPZA2/ASAP3/KIF5B/HLA-E/ARRB1/MVB12B/VTG1/RAB22A/RAB11FIP1/RAB7A/TS

R/HEY1/TRAF3/IL4R/GNB4/FADD/CSF2RB/RBX1/CBL/RALGDS/CSF2RA/CCDC6/GNGT2/WNT4/RPS6  
A2/PSEN2/CACNA1D/COX6C/APBB1/ATP2A2/CSNK2A2/PSMB1/CAPN2/CALM3/NDUFA12/COX5A/PSM  
/NDUFS8/WDR41/ATG13/ACTR1A/COX7A2/BCL2L1/SEH1L/COX6C/PSMB1/RAB1A/NDUFA12/COX5A/





2/PIK3CB/ZNF267/CASP3/MAP3K7/EIF2B1/ZNF549/ZNF792/ZNF530/ZNF101/ZNF528/ZNF768/E

G101/SMAD2/HSPA1A/GIT2/TGFBR1/PLD1/PIP5K1A/RNF41/CHMP6/ACAP1/CHMP2B/SNX2/EPN1/A

KB2/RALB/TRAF4/PLCB2/CCND3/LPAR5/VHL/LAMA4/CALM2/HSP90AA1/STAT5A/CTBP2/CTNNA1/P  
B6/NDUFB4/KLC1/NDUFA9/PIK3CB/CASP3/NDUFB11/PSMA3/COX4I1/NCSTN/CASP7/NOX1/KIF5B  
PSMB6/NXT2/NDUFB4/KLC1/NDUFA9/TNFRSF1B/CASP3/NDUFB11/PSMA3/COX4I1/KIF5B/ULK1/TP





IF2B4/HLA-DOB/ZNF430/ZNF473/ZNF669/TP53/IFNG/ZNF587/ZNF682/EIF2B3/NECTIN2/PPP1C



RFGAP3/IQSEC2/SMURF2/ZFYVE27/GBF1/HLA-G/SMAD3/CHMP4A/SNX6/PARD6A

TK2/PLD2/ABL1/GNAI3/FGFR2/HSP90B1/CCNE2/PTGER4/NOTCH3/NOTCH1/GLI1/MSH6/GNG4/CAS  
53/HNRNPA2B1/PSMB7/UBQLN2/SRSF3/DERL1/NDUFA7/NDUFB2/ATXN2/NUP214/NEFL/PSMD12/NE





B/SRSF3/ZNF785/HLA-E/EIF2B2/RELA/ZNF808/ZNF701/ZNF107/ZNF419/ZNF135/POU2F1/POU2

P8/ARHGEF11/BAD/ADCY6/RHOA/IFNAR2/VEGFA/KITLG

FH/TARDBP/SMCR8/DNAH14/CHMP2B/SRSF7/NDUFA6/TPR/COX6A1/COX7A2L/PSMD6/GABARAP/PPP





F2/EIF2AK1/ZFP69/ZNF257/ZFP82/ZNF845/ZNF841/ZNF347/IKBKB/ZNF766/TSC1/ZNF431/ZNF



'3CB/NUP133/UQCR10/NDUFA11/UQCRFS1/NUP50/NDUFS3/PSMC2/NDUFB10/NDUFB7/NCBP1/EIF2S





211/PIK3R2/ZNF506/ZNF8/ZNF714/ZNF331/SRSF7/ZNF439/ZNF84/ZNF57/ZNF550/ZNF736/TIC

;1/NDUFA3/NRG2/DCTN3/PSMA6/NDUFB5/RB1CC1/WIPI2/VAPB/NDUFAB1





AM1/ZNF614/SRSF4/IL12A/FASLG/ZNF85/HLA-G/ZNF777/ZFP69B/TAB1/ZNF226/ZNF250/ZNF12









2/EIF2S1/ZNF562/ZNF764/ZFP30/ZNF416/ZNF90/TYK2/ZNF559/ZNF26/CASP9/ZNF773/ZIK1/ZI







√F133/IRAK4/ZNF547/ZNF234/ZNF200/TNFRSF1A/TNFSF14/AKT3/ZNF786/TBK1/ZNF286A/ZNF28









34/ZNF551/ZNF182/ZNF778/ZNF613/JAK2/ZNF552/ZNF514/MTOR/ZNF517/ZNF285/ZNF667/ZNF







365/ZNF227/ZNF850/ZNF230/APAF1/ZNF713/ZNF630/ZNF77/ZNF708/BST2/EIF2AK2/ZNF670/Z









NF233/ZNF248/ZNF585B/NXF1/BCL2/ZNF350
