# Supplementary material for: The Landscape of Using Glycosyltransferase Gene Signatures for Overall Survival Prediction in Hepatocellular Carcinoma
Source: Hindawi journal article supplement (doi:10.1155/2022/5989419), 2022-06-21
Supplement: f1 [file 5989419.f1.zip]

|           | logFC     | AveExpr   | t         | PValue    | adj. P. Val | B         |
|-----------|-----------|-----------|-----------|-----------|-------------|-----------|
| HAMP      | -6.215808 | 7.9803831 | -12.44219 | 7.75E-29  | 8.37E-27    | 54.771656 |
| MT1H      | -5.788072 | 8.4196697 | -12.35767 | 1.55E-28  | 1.58E-26    | 54.086819 |
| MT1G      | -5.657436 | 9.7168437 | -9.804198 | 8.08E-20  | 1.64E-18    | 34.25979  |
| CYP1A2    | -5.60258  | 6.3088236 | -11.67721 | 3.87E-26  | 2.53E-24    | 48.629267 |
| CLEC4G    | -5.498155 | 5.356383  | -29.21474 | 6.16E-89  | 2.78E-85    | 191.36866 |
| FCN3      | -4.961    | 6.7782158 | -18.14063 | 7.11E-50  | 9.16E-47    | 102.69591 |
| MARCO     | -4.874071 | 6.3974808 | -20.05129 | 5.78E-57  | 1.04E-53    | 118.83587 |
| CYP3A4    | -4.804377 | 9.6838897 | -7.346982 | 2.01E-12  | 1.31E-11    | 17.511244 |
| MT1M      | -4.791746 | 8.1573282 | -10.60558 | 1.82E-22  | 6.08E-21    | 40.273564 |
| CRHBP     | -4.646921 | 5.0453921 | -21.42913 | 5.15E-62  | 1.33E-58    | 130.32261 |
| MT1F      | -4.503964 | 7.7132646 | -10.83689 | 3.02E-23  | 1.19E-21    | 42.049144 |
| C9        | -4.311951 | 8.974837  | -7.602511 | 3.93E-13  | 2.82E-12    | 19.111325 |
| SLC25A47  | -4.264047 | 8.2930386 | -8.811311 | 1.10E-16  | 1.33E-15    | 27.150476 |
| HSD17B13  | -4.242039 | 6.6583481 | -7.78241  | 1.22E-13  | 9.44E-13    | 20.25975  |
| CXCL14    | -4.214687 | 5.3417439 | -16.28285 | 6.15E-43  | 4.83E-40    | 86.89402  |
| MT1E      | -4.109401 | 8.5390795 | -9.029166 | 2.34E-17  | 3.12E-16    | 28.674544 |
| CLEC4M    | -3.997868 | 3.619805  | -35.48896 | 2.70E-108 | 4.88E-104   | 234.97084 |
| FCN2      | -3.873812 | 4.9067645 | -25.78853 | 1.82E-77  | 5.46E-74    | 165.40891 |
| IGFALS    | -3.872062 | 7.0366122 | -10.54879 | 2.83E-22  | 8.98E-21    | 39.840242 |
| CYP2E1    | -3.71791  | 11.604655 | -5.48605  | 8.87E-08  | 3.13E-07    | 7.0889155 |
| SLC22A1   | -3.691731 | 8.6356704 | -8.053524 | 2.02E-14  | 1.77E-13    | 22.023468 |
| LINC01093 | -3.671094 | 4.6979698 | -14.43471 | 4.50E-36  | 1.85E-33    | 71.254356 |
| MT1X      | -3.617037 | 11.294139 | -8.829909 | 9.64E-17  | 1.18E-15    | 27.279746 |
| ADH4      | -3.589104 | 10.667143 | -6.86597  | 3.93E-11  | 2.11E-10    | 14.602995 |
| CYP2A6    | -3.547614 | 10.239348 | -5.628087 | 4.25E-08  | 1.56E-07    | 7.8013475 |
| CYP2C8    | -3.520129 | 9.3770847 | -8.228476 | 6.21E-15  | 5.81E-14    | 23.181982 |
| CD5L      | -3.416672 | 5.5281761 | -10.89849 | 1.87E-23  | 7.72E-22    | 42.524753 |
| MFS2A     | -3.392646 | 6.0431828 | -8.143452 | 1.10E-14  | 9.93E-14    | 22.617005 |
| THRSP     | -3.392096 | 7.1391778 | -6.41281  | 5.69E-10  | 2.63E-09    | 11.994282 |
| HAO2      | -3.338697 | 6.7233038 | -8.226465 | 6.30E-15  | 5.86E-14    | 23.168579 |
| APOF      | -3.326645 | 8.2520865 | -9.169425 | 8.53E-18  | 1.23E-16    | 29.666848 |
| IGF2      | -3.195961 | 8.0932547 | -4.92076  | 1.44E-06  | 4.33E-06    | 4.4028862 |
| CLEC1B    | -3.181841 | 3.8883898 | -32.59634 | 1.24E-99  | 1.12E-95    | 215.4961  |
| URO1      | -3.179609 | 5.6954388 | -8.08288  | 1.66E-14  | 1.46E-13    | 22.216763 |
| NAT2      | -3.167246 | 5.625456  | -11.0206  | 7.16E-24  | 3.19E-22    | 43.470889 |
| CNDP1     | -3.159894 | 5.0843376 | -11.83876 | 1.05E-26  | 7.42E-25    | 49.915392 |
| HGFAC     | -3.112478 | 7.4311156 | -6.376246 | 7.01E-10  | 3.22E-09    | 11.78959  |
| SLC1B3    | -3.111214 | 5.7503006 | -7.998139 | 2.93E-14  | 2.50E-13    | 21.660007 |
| MT2A      | -3.08796  | 13.067993 | -9.451757 | 1.10E-18  | 1.83E-17    | 31.689594 |
| COLEC10   | -3.074711 | 3.0222671 | -20.15592 | 2.38E-57  | 4.77E-54    | 119.71341 |
| DNASE1L3  | -3.072888 | 7.9832144 | -11.92929 | 5.07E-27  | 3.89E-25    | 50.638875 |
| CYP2B6    | -3.057229 | 7.9213046 | -8.675169 | 2.86E-16  | 3.23E-15    | 26.209007 |
| SFRP5     | -3.035619 | 2.9895428 | -8.534941 | 7.60E-16  | 8.10E-15    | 25.248345 |
| NNMT      | -3.016543 | 11.118507 | -7.068173 | 1.14E-11  | 6.69E-11    | 15.8086   |
| PCK1      | -3.013392 | 8.8912953 | -6.673936 | 1.24E-10  | 6.21E-10    | 13.481501 |
| PZP       | -2.914368 | 5.2332146 | -12.78453 | 4.62E-30  | 6.27E-28    | 57.55972  |
| DCN       | -2.910262 | 8.2050329 | -8.097004 | 1.51E-14  | 1.34E-13    | 22.309919 |
| FOSB      | -2.90134  | 3.2232898 | -9.821334 | 7.11E-20  | 1.45E-18    | 34.385983 |
| BCO2      | -2.891362 | 5.0805045 | -12.42829 | 8.69E-29  | 9.22E-27    | 54.658909 |
| C7        | -2.86814  | 6.2602254 | -7.144896 | 7.12E-12  | 4.28E-11    | 16.272535 |

|           |           |           |           |          |          |           |
|-----------|-----------|-----------|-----------|----------|----------|-----------|
| ECM1      | -2.847396 | 5.5914237 | -13.56776 | 6.78E-33 | 1.75E-30 | 64.013591 |
| OIT3      | -2.834767 | 5.9132737 | -13.78474 | 1.10E-33 | 3.29E-31 | 65.817422 |
| GLYAT     | -2.794354 | 7.5196262 | -6.574856 | 2.22E-10 | 1.08E-09 | 12.912009 |
| CFP       | -2.769972 | 6.1539734 | -17.23785 | 1.67E-46 | 1.88E-43 | 95.020169 |
| FOS       | -2.755256 | 6.4539919 | -8.937139 | 4.51E-17 | 5.78E-16 | 28.028151 |
| CDHR2     | -2.738111 | 5.8494089 | -7.446788 | 1.07E-12 | 7.18E-12 | 18.131788 |
| ADH1C     | -2.733228 | 11.628355 | -5.574794 | 5.61E-08 | 2.02E-07 | 7.5323179 |
| LY6E      | -2.720251 | 7.08332   | -7.989226 | 3.10E-14 | 2.64E-13 | 21.601662 |
| GBA3      | -2.683206 | 7.6812988 | -7.736738 | 1.64E-13 | 1.25E-12 | 19.966512 |
| MOGAT2    | -2.677641 | 4.644891  | -7.793534 | 1.13E-13 | 8.83E-13 | 20.331346 |
| LCAT      | -2.670426 | 7.899347  | -10.47084 | 5.16E-22 | 1.56E-20 | 39.247083 |
| LINC00844 | -2.657391 | 6.5868149 | -6.101928 | 3.30E-09 | 1.39E-08 | 10.282394 |
| DBH       | -2.646447 | 4.3835137 | -12.63367 | 1.61E-29 | 2.00E-27 | 56.328349 |
| JCHAIN    | -2.643082 | 6.7462476 | -6.810095 | 5.50E-11 | 2.90E-10 | 14.274292 |
| BHMT      | -2.640443 | 9.7820589 | -5.943794 | 7.87E-09 | 3.18E-08 | 9.4368636 |
| CYP39A1   | -2.635113 | 4.7379074 | -9.882526 | 4.50E-20 | 9.57E-19 | 34.8375   |
| CXCL12    | -2.633445 | 5.8526466 | -10.6013  | 1.88E-22 | 6.25E-21 | 40.240909 |
| CYP8B1    | -2.601008 | 9.8193868 | -5.189342 | 3.94E-07 | 1.28E-06 | 5.6488447 |
| CYP4A11   | -2.575567 | 8.5209298 | -7.364374 | 1.80E-12 | 1.18E-11 | 17.618969 |
| CYP26A1   | -2.560188 | 4.0283745 | -13.10746 | 3.18E-31 | 6.03E-29 | 60.208906 |
| MT1L      | -2.542673 | 8.9893731 | -7.261616 | 3.44E-12 | 2.16E-11 | 16.985057 |
| RDH16     | -2.534933 | 9.1440514 | -6.727915 | 8.98E-11 | 4.60E-10 | 13.794395 |
| FXYP1     | -2.532594 | 6.6181809 | -7.163074 | 6.36E-12 | 3.86E-11 | 16.382975 |
| AKR1D1    | -2.520228 | 6.2652391 | -6.489675 | 3.65E-10 | 1.72E-09 | 12.427461 |
| GYS2      | -2.49385  | 5.188909  | -7.843478 | 8.16E-14 | 6.48E-13 | 20.653603 |
| LYVE1     | -2.49263  | 4.1169134 | -12.56625 | 2.80E-29 | 3.28E-27 | 55.779477 |
| CLRN3     | -2.476514 | 6.3221738 | -6.21431  | 1.76E-09 | 7.71E-09 | 10.893724 |
| AADAT     | -2.461244 | 5.5363108 | -11.93939 | 4.67E-27 | 3.61E-25 | 50.719683 |
| SLC10A1   | -2.443258 | 9.0832625 | -5.328247 | 1.98E-07 | 6.70E-07 | 6.3148211 |
| HP        | -2.426479 | 15.394764 | -5.987432 | 6.20E-09 | 2.53E-08 | 9.6684641 |
| TD02      | -2.426406 | 9.525062  | -6.156418 | 2.44E-09 | 1.05E-08 | 10.577732 |
| ADH1B     | -2.424948 | 9.5700298 | -6.031367 | 4.87E-09 | 2.01E-08 | 9.9029738 |
| TAT       | -2.397287 | 7.6886382 | -4.790292 | 2.65E-06 | 7.69E-06 | 3.8178624 |
| STAB2     | -2.395367 | 4.5495965 | -30.23138 | 3.23E-92 | 1.94E-88 | 198.77876 |
| VIPR1     | -2.39167  | 3.6825504 | -18.43975 | 5.46E-51 | 7.58E-48 | 105.23435 |
| SHBG      | -2.382047 | 6.7548308 | -7.1171   | 8.46E-12 | 5.04E-11 | 16.104046 |
| CHST4     | -2.375392 | 4.6499269 | -9.905218 | 3.79E-20 | 8.17E-19 | 35.005296 |
| AVPR1A    | -2.343808 | 3.7991782 | -7.222033 | 4.41E-12 | 2.73E-11 | 16.742522 |
| UGT2B7    | -2.341001 | 11.091728 | -6.216245 | 1.74E-09 | 7.63E-09 | 10.904323 |
| AFM       | -2.339818 | 9.3192804 | -6.645957 | 1.46E-10 | 7.26E-10 | 13.320044 |
| CYP2C9    | -2.335517 | 10.965959 | -5.954092 | 7.44E-09 | 3.01E-08 | 9.4913999 |
| F9        | -2.334758 | 10.353331 | -6.04627  | 4.49E-09 | 1.87E-08 | 9.9828218 |
| GHR       | -2.333071 | 6.692006  | -9.391397 | 1.70E-18 | 2.75E-17 | 31.254371 |
| INMT      | -2.328146 | 3.5810424 | -9.468988 | 9.66E-19 | 1.63E-17 | 31.81411  |
| SERPINA11 | -2.322567 | 9.1811366 | -6.875527 | 3.71E-11 | 2.00E-10 | 14.659411 |
| SDS       | -2.308576 | 9.5302666 | -4.052861 | 6.48E-05 | 0.000157 | 0.7690384 |
| PTH1R     | -2.302608 | 4.2634339 | -16.62387 | 3.28E-44 | 3.29E-41 | 89.7949   |
| ASPG      | -2.302032 | 6.6090089 | -7.402649 | 1.41E-12 | 9.37E-12 | 17.856648 |
| KDM8      | -2.290803 | 4.7316441 | -10.15859 | 5.61E-21 | 1.41E-19 | 36.891598 |
| SLC22A10  | -2.289131 | 5.5691822 | -7.878606 | 6.47E-14 | 5.23E-13 | 20.881068 |
| GCCR      | -2.275511 | 6.6849464 | -6.042849 | 4.57E-09 | 1.90E-08 | 9.9644811 |

|           |           |           |           |           |           |           |
|-----------|-----------|-----------|-----------|-----------|-----------|-----------|
| FBP1      | -2.272513 | 10.763041 | -7.76416  | 1.37E-13  | 1.05E-12  | 20.142436 |
| SPP2      | -2.263398 | 8.9862592 | -6.130102 | 2.82E-09  | 1.20E-08  | 10.434844 |
| SAA4      | -2.234744 | 10.331259 | -6.068831 | 3.96E-09  | 1.66E-08  | 10.103996 |
| CYP2A7    | -2.230861 | 6.9815484 | -5.161117 | 4.53E-07  | 1.46E-06  | 5.5153039 |
| LPA       | -2.225712 | 6.4528656 | -9.59818  | 3.73E-19  | 6.68E-18  | 32.751474 |
| GLYATL1   | -2.207043 | 9.342404  | -7.413895 | 1.32E-12  | 8.75E-12  | 17.926645 |
| CETP      | -2.200592 | 5.2690435 | -12.67253 | 1.17E-29  | 1.51E-27  | 56.645117 |
| SRD5A2    | -2.189662 | 5.990242  | -7.669669 | 2.54E-13  | 1.88E-12  | 19.537962 |
| GSTA2     | -2.185405 | 10.291247 | -4.209126 | 3.41E-05  | 8.58E-05  | 1.3777238 |
| HSD11B1   | -2.184878 | 10.841297 | -4.328243 | 2.06E-05  | 5.34E-05  | 1.855391  |
| GLS2      | -2.178683 | 6.5104049 | -7.204285 | 4.92E-12  | 3.03E-11  | 16.63407  |
| DPT       | -2.17809  | 5.1008218 | -7.017923 | 1.56E-11  | 8.92E-11  | 15.506658 |
| HPGD      | -2.175404 | 6.2122212 | -5.089089 | 6.43E-07  | 2.03E-06  | 5.1772801 |
| ANXA10    | -2.172664 | 7.3658765 | -7.12013  | 8.30E-12  | 4.96E-11  | 16.122391 |
| BBOX1     | -2.170108 | 5.9794197 | -6.635938 | 1.55E-10  | 7.68E-10  | 13.262352 |
| EGR1      | -2.156077 | 8.1650688 | -7.830862 | 8.86E-14  | 7.01E-13  | 20.572076 |
| ANGPTL6   | -2.154854 | 5.4355909 | -16.00263 | 6.83E-42  | 4.74E-39  | 84.512188 |
| ACSM5     | -2.142652 | 7.589269  | -6.298152 | 1.10E-09  | 4.92E-09  | 11.355367 |
| BCHE      | -2.132884 | 7.7572029 | -6.572231 | 2.25E-10  | 1.09E-09  | 12.897004 |
| HBB       | -2.132685 | 8.1095592 | -7.770816 | 1.31E-13  | 1.01E-12  | 20.185201 |
| LIFR      | -2.123742 | 4.1630076 | -12.90018 | 1.78E-30  | 2.71E-28  | 58.506421 |
| NTF3      | -2.122239 | 3.6624443 | -18.66599 | 7.85E-52  | 1.18E-48  | 107.15201 |
| PGLYRP2   | -2.116092 | 8.9417597 | -5.668532 | 3.44E-08  | 1.28E-07  | 8.0068957 |
| MFAP4     | -2.10157  | 6.9614286 | -5.712078 | 2.73E-08  | 1.03E-07  | 8.229523  |
| KCNN2     | -2.084506 | 3.8259018 | -13.54006 | 8.56E-33  | 2.17E-30  | 63.783764 |
| C6        | -2.078775 | 9.5795185 | -6.690388 | 1.12E-10  | 5.67E-10  | 13.576669 |
| ALDOB     | -2.075889 | 13.369504 | -5.068364 | 7.11E-07  | 2.23E-06  | 5.0807522 |
| ADH1A     | -2.047981 | 11.759646 | -5.655724 | 3.68E-08  | 1.36E-07  | 7.9416778 |
| VNN1      | -2.033614 | 7.1008623 | -4.999055 | 9.91E-07  | 3.05E-06  | 4.7603512 |
| IL13RA2   | -2.022836 | 3.8492596 | -10.4971  | 4.21E-22  | 1.28E-20  | 39.446672 |
| ADGRG7    | -2.019121 | 4.4413332 | -13.00533 | 7.42E-31  | 1.26E-28  | 59.3692   |
| ENO3      | -2.006235 | 8.2886259 | -7.270024 | 3.26E-12  | 2.06E-11  | 17.036698 |
| IGFBP3    | -2.000914 | 8.4057288 | -8.378269 | 2.24E-15  | 2.23E-14  | 24.186198 |
| MBL2      | -2.000194 | 8.2107605 | -5.739598 | 2.36E-08  | 8.95E-08  | 8.3709149 |
| NGFR      | -1.998039 | 4.7629491 | -7.864267 | 7.11E-14  | 5.70E-13  | 20.78814  |
| SAA1      | -1.993736 | 10.841621 | -3.392624 | 0.0007872 | 0.0016282 | -1.572091 |
| GNMT      | -1.988946 | 8.5927363 | -5.130002 | 5.27E-07  | 1.68E-06  | 5.3687964 |
| HBA2      | -1.961024 | 7.3608422 | -7.854728 | 7.57E-14  | 6.05E-13  | 20.726378 |
| BMPER     | -1.960732 | 1.5307829 | -26.2725  | 3.99E-79  | 1.44E-75  | 169.16682 |
| SAA2      | -1.956739 | 7.2103054 | -3.54356  | 0.000459  | 0.0009866 | -1.07034  |
| DIRAS3    | -1.950824 | 3.1345116 | -11.24656 | 1.20E-24  | 6.13E-23  | 45.232882 |
| LINC01554 | -1.943003 | 5.4424562 | -3.906369 | 0.0001163 | 0.0002725 | 0.217141  |
| SRPX      | -1.941786 | 4.9331602 | -8.680734 | 2.75E-16  | 3.12E-15  | 26.24732  |
| GPD1      | -1.939581 | 7.5144275 | -6.255016 | 1.40E-09  | 6.21E-09  | 11.117268 |
| ALB       | -1.9241   | 16.599465 | -6.003782 | 5.67E-09  | 2.33E-08  | 9.7555751 |
| ASPDH     | -1.923621 | 5.7811153 | -5.882352 | 1.10E-08  | 4.34E-08  | 9.1130263 |
| CPS1      | -1.91603  | 9.9577868 | -3.968929 | 9.08E-05  | 0.0002159 | 0.4506019 |
| UGT2B10   | -1.900623 | 10.17506  | -5.297334 | 2.31E-07  | 7.75E-07  | 6.1653536 |
| C3P1      | -1.880483 | 9.4295962 | -5.350107 | 1.77E-07  | 6.05E-07  | 6.4209534 |
| HRG       | -1.875402 | 13.496712 | -3.904006 | 0.0001174 | 0.0002749 | 0.2083911 |
| SMIM24    | -1.872396 | 4.8177087 | -4.246013 | 2.92E-05  | 7.42E-05  | 1.5243822 |

|         |           |           |           |           |           |           |
|---------|-----------|-----------|-----------|-----------|-----------|-----------|
| ALDH8A1 | -1.866297 | 8.1837074 | -6.851668 | 4.28E-11  | 2.29E-10  | 14.518676 |
| AKR7A3  | -1.862631 | 8.9561438 | -5.459247 | 1.02E-07  | 3.57E-07  | 6.9561378 |
| TTR     | -1.849654 | 14.707386 | -4.939828 | 1.31E-06  | 3.98E-06  | 4.4895037 |
| HPD     | -1.849455 | 10.886281 | -3.574651 | 0.0004098 | 0.0008874 | -0.964493 |
| DTX1    | -1.8336   | 4.3699536 | -6.935306 | 2.58E-11  | 1.42E-10  | 15.013581 |
| MT1A    | -1.831368 | 9.6576226 | -4.616288 | 5.84E-06  | 1.63E-05  | 3.0585988 |
| C1QTNF1 | -1.830467 | 4.1605512 | -6.961456 | 2.20E-11  | 1.23E-10  | 15.1692   |
| RND3    | -1.813958 | 7.3167638 | -9.345787 | 2.38E-18  | 3.74E-17  | 30.926496 |
| GSTZ1   | -1.810533 | 7.7504885 | -9.556267 | 5.08E-19  | 8.91E-18  | 32.446644 |
| PRG4    | -1.810127 | 9.0046364 | -4.671284 | 4.56E-06  | 1.29E-05  | 3.2959643 |
| HPX     | -1.810079 | 13.102259 | -5.849633 | 1.31E-08  | 5.12E-08  | 8.941663  |
| HGF     | -1.808458 | 4.0179289 | -9.221853 | 5.84E-18  | 8.59E-17  | 30.03994  |
| SLC27A5 | -1.80393  | 11.717953 | -5.599097 | 4.94E-08  | 1.80E-07  | 7.6547467 |
| PRSS8   | -1.803249 | 5.4439329 | -4.101924 | 5.31E-05  | 0.0001303 | 0.9579425 |
| FOLH1B  | -1.801052 | 5.287562  | -8.482596 | 1.09E-15  | 1.13E-14  | 24.89215  |
| APOA4   | -1.799681 | 5.5782196 | -2.991813 | 0.0030082 | 0.0056613 | -2.80582  |
| ALPL    | -1.799512 | 5.1865948 | -6.450756 | 4.57E-10  | 2.13E-09  | 12.207648 |
| ID1     | -1.796702 | 8.8255489 | -7.756216 | 1.45E-13  | 1.11E-12  | 20.091428 |
| ACSM3   | -1.794145 | 5.6741171 | -7.808744 | 1.02E-13  | 8.03E-13  | 20.429345 |
| AGXT2   | -1.78713  | 7.5926681 | -5.965316 | 7.00E-09  | 2.84E-08  | 9.5509226 |
| AOX1    | -1.785769 | 10.517828 | -4.647946 | 5.07E-06  | 1.42E-05  | 3.1949409 |
| APOA5   | -1.780886 | 9.4073587 | -5.069956 | 7.05E-07  | 2.22E-06  | 5.0881561 |
| CYP1A1  | -1.780709 | 5.4686937 | -3.855503 | 0.0001419 | 0.0003282 | 0.0297877 |
| FETUB   | -1.778441 | 9.1190373 | -4.451568 | 1.21E-05  | 3.24E-05  | 2.3622601 |
| FABP1   | -1.773102 | 13.862045 | -4.016006 | 7.52E-05  | 0.0001806 | 0.6284775 |
| KMO     | -1.7663   | 5.675683  | -7.724695 | 1.78E-13  | 1.34E-12  | 19.889378 |
| OXT     | -1.766252 | 4.9773157 | -6.291011 | 1.14E-09  | 5.12E-09  | 11.315866 |
| HHIP    | -1.762361 | 2.1817536 | -16.1879  | 1.39E-42  | 1.05E-39  | 86.086704 |
| LECT2   | -1.760857 | 9.9706847 | -4.196848 | 3.59E-05  | 9.01E-05  | 1.3291581 |
| CYP4F2  | -1.758239 | 8.5856502 | -5.101056 | 6.07E-07  | 1.92E-06  | 5.2331628 |
| PHLDA1  | -1.75316  | 5.4403388 | -7.544144 | 5.72E-13  | 4.01E-12  | 18.742582 |
| TMEM45A | -1.751528 | 7.3955139 | -5.238809 | 3.09E-07  | 1.02E-06  | 5.8843465 |
| TBX15   | -1.750296 | 5.6505216 | -6.235843 | 1.56E-09  | 6.89E-09  | 11.011835 |
| KRT19   | -1.750244 | 5.840539  | -3.768173 | 0.0001987 | 0.0004507 | -0.286698 |
| C8A     | -1.750231 | 10.362426 | -6.30437  | 1.06E-09  | 4.76E-09  | 11.389791 |
| ZG16    | -1.750128 | 6.534912  | -6.867255 | 3.90E-11  | 2.10E-10  | 14.610577 |
| APOA1   | -1.749007 | 14.747973 | -4.557472 | 7.60E-06  | 2.09E-05  | 2.8074401 |
| RCAN1   | -1.747094 | 7.0095382 | -10.80306 | 3.93E-23  | 1.52E-21  | 41.788418 |
| LRCOL1  | -1.735086 | 5.9540791 | -6.68522  | 1.16E-10  | 5.83E-10  | 13.546758 |
| GSTM1   | -1.728758 | 5.3070507 | -2.84012  | 0.0048243 | 0.0087735 | -3.234773 |
| PLAC8   | -1.71089  | 4.6979141 | -11.20103 | 1.72E-24  | 8.48E-23  | 44.876746 |
| ITLN1   | -1.706959 | 4.3694125 | -10.79264 | 4.26E-23  | 1.64E-21  | 41.708214 |
| CXCL2   | -1.705252 | 7.8742083 | -5.737337 | 2.39E-08  | 9.05E-08  | 8.3592796 |
| ACSL1   | -1.699667 | 10.211324 | -6.88318  | 3.54E-11  | 1.92E-10  | 14.704632 |
| SLC7A2  | -1.699375 | 5.372109  | -6.666676 | 1.29E-10  | 6.48E-10  | 13.439557 |
| NPY1R   | -1.693733 | 3.6152726 | -10.87091 | 2.31E-23  | 9.43E-22  | 42.311681 |
| COLEC11 | -1.693458 | 8.2084256 | -5.67832  | 3.26E-08  | 1.22E-07  | 8.056819  |
| HOGA1   | -1.692458 | 5.751196  | -6.869565 | 3.84E-11  | 2.07E-10  | 14.624209 |
| CRP     | -1.690709 | 8.9035169 | -2.594581 | 0.0099454 | 0.0170762 | -3.884208 |
| ATF5    | -1.686153 | 9.7217917 | -4.500716 | 9.77E-06  | 2.64E-05  | 2.5677271 |
| FCGR2B  | -1.677722 | 4.9784722 | -7.899086 | 5.65E-14  | 4.61E-13  | 21.01399  |

|          |           |           |           |           |           |           |
|----------|-----------|-----------|-----------|-----------|-----------|-----------|
| GPM6A    | -1.672946 | 3.8327583 | -14.16554 | 4.40E-35  | 1.66E-32  | 68.997209 |
| PLG      | -1.672885 | 11.486635 | -5.252448 | 2.89E-07  | 9.56E-07  | 5.9496036 |
| PON1     | -1.666513 | 8.000141  | -4.504013 | 9.63E-06  | 2.61E-05  | 2.5815801 |
| S100A8   | -1.665574 | 6.1706458 | -7.02016  | 1.54E-11  | 8.81E-11  | 15.520071 |
| TIMD4    | -1.659368 | 4.4420651 | -12.24168 | 4.00E-28  | 3.78E-26  | 53.149316 |
| AZGP1    | -1.657905 | 12.311189 | -5.724315 | 2.56E-08  | 9.66E-08  | 8.2923282 |
| TACSTD2  | -1.656171 | 4.4263076 | -5.826741 | 1.48E-08  | 5.76E-08  | 8.8222146 |
| PBLD     | -1.655452 | 8.0060906 | -6.959434 | 2.23E-11  | 1.24E-10  | 15.157148 |
| H19      | -1.637615 | 8.2799253 | -3.187708 | 0.0015886 | 0.0031307 | -2.22089  |
| ADAMTS13 | -1.637567 | 4.5310939 | -16.43326 | 1.69E-43  | 1.45E-40  | 88.173261 |
| SERPINE1 | -1.633398 | 5.7132989 | -5.166776 | 4.40E-07  | 1.42E-06  | 5.5420304 |
| SOCS2    | -1.629943 | 5.0983628 | -8.217346 | 6.70E-15  | 6.21E-14  | 23.107821 |
| CYP2B7P  | -1.626067 | 4.8188997 | -3.541371 | 0.0004627 | 0.000994  | -1.077757 |
| ASS1     | -1.609489 | 11.073942 | -7.627048 | 3.35E-13  | 2.43E-12  | 19.26691  |
| OLFML3   | -1.607924 | 4.8987497 | -6.824418 | 5.04E-11  | 2.67E-10  | 14.358367 |
| MAT1A    | -1.607097 | 12.024197 | -6.243314 | 1.49E-09  | 6.62E-09  | 11.052889 |
| SLC39A5  | -1.603291 | 8.470541  | -4.317436 | 2.16E-05  | 5.59E-05  | 1.8115702 |
| GREM2    | -1.601161 | 4.9829987 | -4.865509 | 1.86E-06  | 5.53E-06  | 4.1535057 |
| ADAMTSL2 | -1.582624 | 5.9149457 | -5.622336 | 4.38E-08  | 1.61E-07  | 7.7722155 |
| SOCS3    | -1.580573 | 5.3971552 | -5.934656 | 8.27E-09  | 3.33E-08  | 9.388531  |
| GNAO1    | -1.579164 | 2.9525818 | -7.798364 | 1.10E-13  | 8.57E-13  | 20.362447 |
| CFHR3    | -1.576051 | 9.1726776 | -4.177756 | 3.89E-05  | 9.71E-05  | 1.2538899 |
| DNAJC12  | -1.57588  | 6.4140451 | -5.564769 | 5.91E-08  | 2.13E-07  | 7.4819402 |
| ORM1     | -1.563283 | 14.726579 | -5.00205  | 9.77E-07  | 3.01E-06  | 4.7741202 |
| FGB      | -1.562707 | 13.69445  | -4.884193 | 1.71E-06  | 5.08E-06  | 4.2375688 |
| SULT2A1  | -1.55536  | 10.238865 | -3.902475 | 0.0001181 | 0.0002764 | 0.2027203 |
| IL1RAP   | -1.554674 | 4.9041678 | -8.661166 | 3.16E-16  | 3.54E-15  | 26.112654 |
| CSRP1    | -1.552835 | 5.5076332 | -10.51935 | 3.55E-22  | 1.09E-20  | 39.615961 |
| CDA      | -1.552764 | 6.8817609 | -5.534646 | 6.91E-08  | 2.47E-07  | 7.3310072 |
| OGDHL    | -1.55145  | 8.896025  | -5.088323 | 6.45E-07  | 2.04E-06  | 5.1737035 |
| ALDH6A1  | -1.547383 | 9.0969466 | -6.777288 | 6.69E-11  | 3.48E-10  | 14.082208 |
| PROZ     | -1.54538  | 6.7520548 | -6.282691 | 1.20E-09  | 5.35E-09  | 11.269884 |
| IGFBP1   | -1.544078 | 11.091413 | -4.021476 | 7.36E-05  | 0.0001769 | 0.6492655 |
| FAM151A  | -1.541997 | 4.3062012 | -5.479021 | 9.20E-08  | 3.24E-07  | 7.0540449 |
| CYP2C19  | -1.535315 | 5.7845007 | -10.62455 | 1.57E-22  | 5.38E-21  | 40.418571 |
| CD4      | -1.534099 | 8.8877428 | -7.59331  | 4.17E-13  | 2.98E-12  | 19.05307  |
| HAO1     | -1.53342  | 10.011119 | -5.075083 | 6.88E-07  | 2.17E-06  | 5.1120113 |
| GGT5     | -1.529604 | 6.3197885 | -5.798056 | 1.73E-08  | 6.67E-08  | 8.6730627 |
| STEAP4   | -1.523504 | 3.2566062 | -7.71454  | 1.90E-13  | 1.43E-12  | 19.824397 |
| KLKB1    | -1.520002 | 8.3846317 | -6.716805 | 9.60E-11  | 4.89E-10  | 13.729846 |
| LRAT     | -1.519885 | 2.7314915 | -14.3592  | 8.54E-36  | 3.35E-33  | 70.620371 |
| PDGFRA   | -1.518131 | 3.5720475 | -6.575801 | 2.21E-10  | 1.07E-09  | 12.917408 |
| STEAP3   | -1.504528 | 7.972074  | -6.58294  | 2.12E-10  | 1.03E-09  | 12.958236 |
| ADH6     | -1.501417 | 7.5707085 | -5.612614 | 4.61E-08  | 1.69E-07  | 7.7230263 |
| ZFP36    | -1.500102 | 9.1406799 | -7.693167 | 2.18E-13  | 1.63E-12  | 19.687821 |
| PHGDH    | -1.496693 | 7.1266115 | -5.436795 | 1.14E-07  | 3.98E-07  | 6.8453199 |
| SLC28A1  | -1.488602 | 5.5739908 | -4.813166 | 2.38E-06  | 6.95E-06  | 3.9194647 |
| CPED1    | -1.484928 | 4.2049949 | -7.354495 | 1.92E-12  | 1.25E-11  | 17.55776  |
| TFPI2    | -1.48416  | 4.1836874 | -7.829216 | 8.96E-14  | 7.08E-13  | 20.561441 |
| FAM13A   | -1.482315 | 3.1499959 | -8.207966 | 7.14E-15  | 6.59E-14  | 23.045361 |
| GADD45B  | -1.482096 | 8.6438723 | -6.990599 | 1.84E-11  | 1.04E-10  | 15.343122 |

|          |           |           |           |           |           |           |
|----------|-----------|-----------|-----------|-----------|-----------|-----------|
| HSD17B6  | -1.481138 | 11.532282 | -4.312856 | 2.20E-05  | 5.68E-05  | 1.7930278 |
| MAN1C1   | -1.473264 | 5.1915983 | -7.0196   | 1.54E-11  | 8.84E-11  | 15.516714 |
| BGN      | -1.467138 | 7.0769844 | -4.862338 | 1.89E-06  | 5.60E-06  | 4.1392687 |
| GBP7     | -1.46667  | 6.8185361 | -4.478666 | 1.08E-05  | 2.89E-05  | 2.4753033 |
| ESR1     | -1.465999 | 3.0227087 | -10.52755 | 3.33E-22  | 1.03E-20  | 39.678402 |
| DMGDH    | -1.458084 | 7.5236243 | -6.122212 | 2.95E-09  | 1.25E-08  | 10.392099 |
| PPP1R1A  | -1.452283 | 7.6506288 | -3.578559 | 0.0004039 | 0.0008757 | -0.951126 |
| MFAP3L   | -1.444349 | 2.8728519 | -6.762643 | 7.30E-11  | 3.79E-10  | 13.996675 |
| CCL21    | -1.444227 | 6.2592559 | -3.16746  | 0.0016995 | 0.0033256 | -2.282958 |
| SLC13A5  | -1.441427 | 9.3677604 | -3.918042 | 0.0001111 | 0.0002611 | 0.2604511 |
| ACADS    | -1.440039 | 7.8088155 | -9.748121 | 1.23E-19  | 2.42E-18  | 33.847618 |
| VSIG4    | -1.439705 | 7.1033122 | -6.542933 | 2.67E-10  | 1.29E-09  | 12.729866 |
| PHYHD1   | -1.439444 | 6.4141871 | -4.766706 | 2.95E-06  | 8.52E-06  | 3.7135373 |
| PLA2G2A  | -1.437184 | 8.2625951 | -2.128592 | 0.0341192 | 0.0527321 | -4.96171  |
| IDO2     | -1.433696 | 4.3648732 | -7.455803 | 1.01E-12  | 6.80E-12  | 18.188126 |
| WDR72    | -1.43322  | 3.7239667 | -5.643348 | 3.92E-08  | 1.45E-07  | 7.878768  |
| C1R      | -1.431898 | 11.786708 | -7.622983 | 3.44E-13  | 2.49E-12  | 19.241115 |
| AQP9     | -1.428615 | 10.550879 | -3.389847 | 0.0007949 | 0.001643  | -1.581134 |
| EPHA2    | -1.426848 | 5.0049304 | -6.845101 | 4.45E-11  | 2.38E-10  | 14.480004 |
| SLC22A7  | -1.425475 | 8.7923526 | -3.422814 | 0.0007077 | 0.0014758 | -1.473339 |
| ORM2     | -1.424386 | 13.715739 | -5.19332  | 3.86E-07  | 1.26E-06  | 5.6677155 |
| CCBE1    | -1.421937 | 3.0782451 | -16.48528 | 1.08E-43  | 1.03E-40  | 88.615831 |
| ACADSB   | -1.421639 | 8.044303  | -6.838933 | 4.62E-11  | 2.46E-10  | 14.443702 |
| GPR182   | -1.42113  | 3.1890108 | -16.44387 | 1.54E-43  | 1.39E-40  | 88.263478 |
| FTCD     | -1.418845 | 10.127026 | -4.727309 | 3.53E-06  | 1.01E-05  | 3.5402541 |
| CD163    | -1.418573 | 7.811607  | -6.582405 | 2.12E-10  | 1.03E-09  | 12.955177 |
| SULT1E1  | -1.414229 | 3.7613231 | -4.690936 | 4.17E-06  | 1.18E-05  | 3.3813687 |
| OTC      | -1.410178 | 9.4815564 | -3.703513 | 0.0002539 | 0.0005674 | -0.516783 |
| RDH5     | -1.40942  | 6.8769895 | -6.577979 | 2.18E-10  | 1.06E-09  | 12.929858 |
| ARG1     | -1.409338 | 11.761205 | -3.640921 | 0.0003209 | 0.000707  | -0.736058 |
| PLIN1    | -1.406797 | 4.2828105 | -5.653105 | 3.73E-08  | 1.38E-07  | 7.928355  |
| IGLL5    | -1.403713 | 7.0827875 | -3.704043 | 0.0002534 | 0.0005665 | -0.514913 |
| CPEB3    | -1.403664 | 4.0581377 | -11.12327 | 3.19E-24  | 1.50E-22  | 44.269675 |
| IL33     | -1.400231 | 5.5648255 | -6.983595 | 1.92E-11  | 1.08E-10  | 15.301275 |
| SLC38A4  | -1.397766 | 8.1957807 | -5.057435 | 7.49E-07  | 2.35E-06  | 5.0299816 |
| FITM1    | -1.396291 | 3.4930538 | -9.643806 | 2.66E-19  | 4.95E-18  | 33.084093 |
| PAMR1    | -1.395417 | 4.322997  | -8.67332  | 2.90E-16  | 3.27E-15  | 26.196276 |
| CCL19    | -1.394899 | 7.1867738 | -3.259069 | 0.0012489 | 0.0025048 | -1.999209 |
| C8B      | -1.393841 | 9.8116079 | -5.34328  | 1.83E-07  | 6.25E-07  | 6.38777   |
| SLC46A3  | -1.391713 | 5.761987  | -4.923231 | 1.42E-06  | 4.28E-06  | 4.4140934 |
| HAND2    | -1.389974 | 3.6857343 | -7.298089 | 2.74E-12  | 1.74E-11  | 17.209356 |
| SLC3A1   | -1.388916 | 4.823176  | -4.851893 | 1.99E-06  | 5.87E-06  | 4.0924192 |
| RASGEF1B | -1.386187 | 3.8515136 | -7.341464 | 2.08E-12  | 1.35E-11  | 17.477108 |
| TUBE1    | -1.382509 | 5.2062018 | -9.552222 | 5.24E-19  | 9.16E-18  | 32.41726  |
| MT1JP    | -1.380935 | 4.6321376 | -7.942172 | 4.25E-14  | 3.54E-13  | 21.294355 |
| FM03     | -1.379251 | 10.150326 | -4.002366 | 7.94E-05  | 0.0001902 | 0.5767445 |
| ACADL    | -1.379155 | 4.7846642 | -5.353359 | 1.74E-07  | 5.96E-07  | 6.4367678 |
| PDK4     | -1.374258 | 7.4058432 | -4.454212 | 1.20E-05  | 3.20E-05  | 2.3732655 |
| NR1I2    | -1.372051 | 6.5718489 | -4.7829   | 2.74E-06  | 7.94E-06  | 3.7851181 |
| ANO1     | -1.365982 | 5.8954383 | -4.457713 | 1.18E-05  | 3.16E-05  | 2.3878429 |
| FAM180A  | -1.365655 | 3.5676931 | -10.01335 | 1.68E-20  | 3.86E-19  | 35.807455 |

|          |           |           |           |           |           |           |
|----------|-----------|-----------|-----------|-----------|-----------|-----------|
| CP       | -1.365517 | 10.883286 | -4.628467 | 5.53E-06  | 1.54E-05  | 3.1109557 |
| ALDH2    | -1.364325 | 11.101955 | -8.036075 | 2.27E-14  | 1.97E-13  | 21.908789 |
| CA2      | -1.360061 | 8.3258758 | -5.27154  | 2.62E-07  | 8.74E-07  | 6.0411879 |
| IL1RN    | -1.359489 | 6.44448   | -5.805732 | 1.66E-08  | 6.41E-08  | 8.7129182 |
| PVALB    | -1.358382 | 2.9414564 | -17.4386  | 2.97E-47  | 3.57E-44  | 96.728287 |
| MS4A6A   | -1.358165 | 6.3970713 | -6.943328 | 2.46E-11  | 1.36E-10  | 15.061276 |
| PLSCR4   | -1.3555   | 6.5829596 | -7.267231 | 3.32E-12  | 2.09E-11  | 17.019538 |
| ABAT     | -1.354189 | 8.9354462 | -5.380211 | 1.52E-07  | 5.24E-07  | 6.5676891 |
| SLC1A1   | -1.353221 | 5.7386526 | -4.602509 | 6.22E-06  | 1.73E-05  | 2.9995084 |
| ADRA1A   | -1.352855 | 2.3424488 | -14.45995 | 3.63E-36  | 1.56E-33  | 71.46632  |
| SLC5A1   | -1.352331 | 2.9618163 | -7.625546 | 3.38E-13  | 2.45E-12  | 19.257377 |
| THBS1    | -1.342019 | 5.8934303 | -4.637846 | 5.30E-06  | 1.48E-05  | 3.1513539 |
| SLITRK3  | -1.339463 | 1.4437409 | -8.217282 | 6.70E-15  | 6.21E-14  | 23.107388 |
| ETFDH    | -1.338858 | 8.720948  | -8.253598 | 5.24E-15  | 4.95E-14  | 23.349621 |
| NR4A1    | -1.338535 | 4.5069596 | -6.141989 | 2.64E-09  | 1.13E-08  | 10.499332 |
| GOS2     | -1.338149 | 10.044627 | -3.898678 | 0.0001199 | 0.00028   | 0.1886708 |
| APOC3    | -1.335722 | 15.076985 | -3.603238 | 0.0003689 | 0.0008048 | -0.866422 |
| DUSP1    | -1.335386 | 9.1094722 | -6.004051 | 5.66E-09  | 2.33E-08  | 9.757011  |
| NPC1L1   | -1.333992 | 5.0196966 | -3.520822 | 0.0004985 | 0.0010643 | -1.147209 |
| ATOH8    | -1.332004 | 4.4959711 | -7.005559 | 1.68E-11  | 9.56E-11  | 15.432605 |
| CXCR2P1  | -1.330606 | 3.4739876 | -6.473607 | 4.00E-10  | 1.88E-09  | 12.336592 |
| EHD3     | -1.330125 | 4.2738196 | -9.103514 | 1.37E-17  | 1.90E-16  | 29.199477 |
| PON3     | -1.328188 | 11.397379 | -5.661353 | 3.57E-08  | 1.32E-07  | 7.9703271 |
| IYD      | -1.327914 | 5.7808198 | -6.257238 | 1.38E-09  | 6.13E-09  | 11.129497 |
| MRC1     | -1.326205 | 6.1968084 | -5.419059 | 1.25E-07  | 4.34E-07  | 6.7580421 |
| ACSM2A   | -1.322975 | 7.9021457 | -4.218814 | 3.27E-05  | 8.26E-05  | 1.416133  |
| XDH      | -1.320274 | 5.8283337 | -4.745596 | 3.25E-06  | 9.33E-06  | 3.6205323 |
| HAL      | -1.319332 | 6.6766525 | -3.153746 | 0.0017786 | 0.003473  | -2.324785 |
| APCS     | -1.315611 | 12.205188 | -3.882306 | 0.0001278 | 0.0002972 | 0.1282336 |
| AGXT     | -1.315494 | 10.499173 | -3.801328 | 0.000175  | 0.0004005 | -0.167319 |
| PLPP3    | -1.312309 | 8.8374319 | -6.768799 | 7.04E-11  | 3.66E-10  | 14.032613 |
| TPPP2    | -1.309314 | 4.589549  | -8.671481 | 2.94E-16  | 3.31E-15  | 26.183621 |
| FGL1     | -1.308836 | 13.111856 | -3.775924 | 0.0001929 | 0.0004387 | -0.258876 |
| MT1B     | -1.306917 | 7.4728342 | -4.045995 | 6.66E-05  | 0.0001612 | 0.7427642 |
| TRIB1    | -1.306678 | 7.4460393 | -7.938553 | 4.35E-14  | 3.62E-13  | 21.27077  |
| AQP3     | -1.302459 | 8.1126313 | -6.017782 | 5.25E-09  | 2.16E-08  | 9.8303195 |
| TSLP     | -1.300658 | 3.9068456 | -9.437129 | 1.22E-18  | 2.01E-17  | 31.583985 |
| SLC27A2  | -1.297054 | 9.5345207 | -4.829988 | 2.20E-06  | 6.46E-06  | 3.994445  |
| RAB25    | -1.293488 | 2.8657719 | -3.694846 | 0.0002623 | 0.0005853 | -0.54735  |
| SLC01B1  | -1.292606 | 9.11282   | -4.099765 | 5.36E-05  | 0.0001314 | 0.9495876 |
| INHBC    | -1.290715 | 6.1254779 | -4.282957 | 2.50E-05  | 6.40E-05  | 1.6724038 |
| KCND3    | -1.283816 | 1.8210684 | -7.884657 | 6.22E-14  | 5.03E-13  | 20.92032  |
| ANGPTL1  | -1.283796 | 3.6114766 | -5.43392  | 1.16E-07  | 4.04E-07  | 6.8311524 |
| AHSG     | -1.281886 | 14.16213  | -3.128779 | 0.0019315 | 0.0037508 | -2.400499 |
| ACAA2    | -1.281781 | 10.399617 | -7.534939 | 6.07E-13  | 4.24E-12  | 18.684604 |
| C11orf96 | -1.281524 | 8.2159483 | -4.991567 | 1.03E-06  | 3.16E-06  | 4.7259546 |
| FGG      | -1.27938  | 14.562672 | -4.178543 | 3.87E-05  | 9.68E-05  | 1.2569846 |
| CAMK2B   | -1.277888 | 3.2987785 | -6.70808  | 1.01E-10  | 5.14E-10  | 13.679204 |
| MASP1    | -1.276233 | 5.95265   | -6.787399 | 6.30E-11  | 3.29E-10  | 14.141337 |
| OAT      | -1.272961 | 6.4283812 | -3.51943  | 0.000501  | 0.001069  | -1.1519   |
| EPHX2    | -1.271407 | 9.5422696 | -6.699659 | 1.06E-10  | 5.39E-10  | 13.630375 |

|           |           |           |           |           |           |           |
|-----------|-----------|-----------|-----------|-----------|-----------|-----------|
| PLIN2     | -1.2684   | 9.4756692 | -5.916093 | 9.15E-09  | 3.66E-08  | 9.2905379 |
| MPPED1    | -1.267863 | 5.6727781 | -5.146367 | 4.87E-07  | 1.56E-06  | 5.44576   |
| RNF125    | -1.267283 | 4.3444846 | -8.560838 | 6.35E-16  | 6.85E-15  | 25.42506  |
| NAAA      | -1.265279 | 6.2212214 | -8.184203 | 8.39E-15  | 7.66E-14  | 22.887331 |
| CCL14     | -1.264254 | 5.9574571 | -9.130108 | 1.13E-17  | 1.58E-16  | 29.387831 |
| COX6A2    | -1.262408 | 8.8882982 | -3.63419  | 0.000329  | 0.0007237 | -0.759434 |
| HABP2     | -1.26171  | 9.3421371 | -3.595437 | 0.0003797 | 0.0008262 | -0.893255 |
| SKAP1     | -1.261709 | 6.776602  | -5.853951 | 1.28E-08  | 5.01E-08  | 8.9642358 |
| SFRP1     | -1.260347 | 3.9972278 | -9.202024 | 6.74E-18  | 9.85E-17  | 29.898693 |
| RSPO3     | -1.251472 | 3.210059  | -10.04811 | 1.29E-20  | 3.05E-19  | 36.066258 |
| FGA       | -1.251343 | 13.222761 | -4.193366 | 3.64E-05  | 9.13E-05  | 1.315407  |
| KBTBD11   | -1.249132 | 5.303088  | -10.28448 | 2.15E-21  | 5.89E-20  | 37.837291 |
| GSTA1     | -1.249065 | 11.414512 | -3.052905 | 0.0024736 | 0.0047137 | -2.627133 |
| LRG1      | -1.247296 | 11.115632 | -4.914737 | 1.48E-06  | 4.45E-06  | 4.3755843 |
| GCH1      | -1.247085 | 6.0370447 | -6.389273 | 6.51E-10  | 2.99E-09  | 11.862416 |
| A1BG      | -1.246345 | 10.589094 | -4.35276  | 1.86E-05  | 4.84E-05  | 1.9551602 |
| CTH       | -1.245154 | 8.2868875 | -4.079869 | 5.81E-05  | 0.0001417 | 0.8727755 |
| PTGIS     | -1.243988 | 3.4998106 | -6.172436 | 2.23E-09  | 9.64E-09  | 10.664936 |
| CLDN2     | -1.243538 | 4.7535963 | -2.971061 | 0.0032127 | 0.0060204 | -2.865744 |
| DHODH     | -1.24238  | 7.8466504 | -7.217164 | 4.54E-12  | 2.81E-11  | 16.712753 |
| DPYS      | -1.238728 | 8.7006577 | -4.293377 | 2.39E-05  | 6.14E-05  | 1.7143563 |
| HMGCS2    | -1.23157  | 11.4333   | -4.014444 | 7.57E-05  | 0.0001817 | 0.6225461 |
| CYP2C18   | -1.230836 | 8.1385858 | -4.11033  | 5.13E-05  | 0.0001261 | 0.9905082 |
| EGR2      | -1.228402 | 3.9263405 | -6.650055 | 1.43E-10  | 7.10E-10  | 13.34366  |
| HS3ST3B1  | -1.22552  | 3.3978339 | -5.996705 | 5.90E-09  | 2.41E-08  | 9.7178451 |
| LINC01370 | -1.225017 | 3.6030936 | -3.27154  | 0.001197  | 0.0024087 | -1.96     |
| EHHADH    | -1.223793 | 7.7537504 | -4.720153 | 3.65E-06  | 1.04E-05  | 3.5089122 |
| AGTR1     | -1.221814 | 6.4011833 | -5.576753 | 5.55E-08  | 2.01E-07  | 7.5421693 |
| CD1D      | -1.218131 | 4.4849984 | -6.641127 | 1.50E-10  | 7.46E-10  | 13.292223 |
| S100A12   | -1.217006 | 3.4179008 | -10.64471 | 1.35E-22  | 4.65E-21  | 40.57275  |
| PLEK2     | -1.213745 | 5.9446387 | -3.661308 | 0.0002974 | 0.0006584 | -0.665011 |
| MME       | -1.208054 | 3.8703372 | -3.260002 | 0.001245  | 0.0024983 | -1.996281 |
| PRELP     | -1.207504 | 5.1887805 | -4.406956 | 1.47E-05  | 3.89E-05  | 2.1774643 |
| ACOT12    | -1.207321 | 7.2726332 | -4.548472 | 7.91E-06  | 2.17E-05  | 2.7692532 |
| SERPINA4  | -1.206474 | 9.79532   | -3.95896  | 9.45E-05  | 0.000224  | 0.4131779 |
| SLC6A12   | -1.205167 | 7.0704356 | -4.417849 | 1.40E-05  | 3.72E-05  | 2.2224381 |
| SLC39A14  | -1.200413 | 7.5319621 | -6.726165 | 9.08E-11  | 4.64E-10  | 13.784222 |
| ACAA1     | -1.200142 | 10.231366 | -8.091999 | 1.56E-14  | 1.38E-13  | 22.276894 |
| ABCA8     | -1.196174 | 5.0592964 | -5.312755 | 2.14E-07  | 7.21E-07  | 6.2398277 |
| CYP3A43   | -1.194207 | 3.9085847 | -5.7843   | 1.86E-08  | 7.17E-08  | 8.6017438 |
| EPB41L4B  | -1.191218 | 5.11963   | -6.466716 | 4.17E-10  | 1.96E-09  | 12.297668 |
| AMDHD1    | -1.187595 | 9.0931279 | -4.833187 | 2.17E-06  | 6.37E-06  | 4.008729  |
| ITGA9     | -1.187484 | 4.4249165 | -7.4679   | 9.33E-13  | 6.32E-12  | 18.263789 |
| NAPSB     | -1.185819 | 5.9330256 | -5.242902 | 3.02E-07  | 1.00E-06  | 5.9039116 |
| SAMD5     | -1.182603 | 4.6253991 | -6.153305 | 2.48E-09  | 1.06E-08  | 10.560807 |
| NOCT      | -1.182411 | 3.2340649 | -5.838513 | 1.39E-08  | 5.42E-08  | 8.883595  |
| MAGI2-AS3 | -1.181985 | 3.7678474 | -6.043282 | 4.56E-09  | 1.89E-08  | 9.9668009 |
| LEAP2     | -1.176663 | 10.493956 | -4.477889 | 1.08E-05  | 2.90E-05  | 2.4720531 |
| CD14      | -1.173304 | 10.470638 | -5.267678 | 2.67E-07  | 8.90E-07  | 6.0226381 |
| GNE       | -1.172809 | 8.4841718 | -6.366787 | 7.41E-10  | 3.39E-09  | 11.736777 |
| DUSP6     | -1.170581 | 8.2216112 | -6.606088 | 1.85E-10  | 9.07E-10  | 13.090841 |



|           |           |           |           |           |           |           |
|-----------|-----------|-----------|-----------|-----------|-----------|-----------|
| SHMT1     | -1.168629 | 7.9936459 | -5.338422 | 1.88E-07  | 6.39E-07  | 6.3641796 |
| DUSP5     | -1.168505 | 5.1942674 | -5.351538 | 1.76E-07  | 6.01E-07  | 6.4279127 |
| CFHR4     | -1.167868 | 8.1652683 | -3.528735 | 0.0004844 | 0.0010364 | -1.120511 |
| GADD45G   | -1.161093 | 7.9635412 | -4.666563 | 4.66E-06  | 1.31E-05  | 3.2754915 |
| ABCC9     | -1.16086  | 4.2984073 | -5.149373 | 4.79E-07  | 1.54E-06  | 5.4599196 |
| TCTEX1D1  | -1.156648 | 2.4926351 | -8.798747 | 1.20E-16  | 1.44E-15  | 27.06323  |
| CFTR      | -1.155152 | 2.6372961 | -4.484906 | 1.05E-05  | 2.82E-05  | 2.5014176 |
| ADGRG6    | -1.15313  | 6.2059427 | -5.146461 | 4.86E-07  | 1.56E-06  | 5.4462027 |
| IRF8      | -1.151778 | 4.9981484 | -5.981444 | 6.41E-09  | 2.61E-08  | 9.6366037 |
| DAO       | -1.151454 | 8.757005  | -3.58892  | 0.0003889 | 0.000845  | -0.91563  |
| FPR1      | -1.151251 | 4.9003158 | -6.025529 | 5.03E-09  | 2.08E-08  | 9.8717352 |
| HMOX1     | -1.14864  | 9.7365472 | -4.965738 | 1.16E-06  | 3.54E-06  | 4.6076538 |
| TMEM220   | -1.144208 | 7.0860086 | -6.61293  | 1.77E-10  | 8.74E-10  | 13.130106 |
| PRODH2    | -1.143662 | 9.2327542 | -3.883047 | 0.0001274 | 0.0002965 | 0.1309652 |
| TM6SF2    | -1.141466 | 5.5900155 | -4.866715 | 1.85E-06  | 5.50E-06  | 4.1589253 |
| LUM       | -1.134858 | 6.9069853 | -2.708103 | 0.0071632 | 0.0126199 | -3.590885 |
| MPC1      | -1.132066 | 9.5982468 | -7.585633 | 4.38E-13  | 3.12E-12  | 19.0045   |
| PSAT1     | -1.13123  | 8.6614102 | -4.563232 | 7.41E-06  | 2.04E-05  | 2.8319156 |
| ERRFI1    | -1.126591 | 7.9997651 | -4.969047 | 1.14E-06  | 3.49E-06  | 4.6227811 |
| CCL23     | -1.126426 | 3.8031488 | -14.44759 | 4.03E-36  | 1.69E-33  | 71.362531 |
| CLDN10    | -1.12605  | 3.6954882 | -4.88495  | 1.70E-06  | 5.07E-06  | 4.2409826 |
| SLC16A4   | -1.124649 | 3.4355559 | -5.898122 | 1.01E-08  | 4.01E-08  | 9.1958912 |
| SLC19A3   | -1.123714 | 3.7590338 | -6.566215 | 2.33E-10  | 1.13E-09  | 12.862639 |
| ANG       | -1.122263 | 12.777752 | -4.533488 | 8.45E-06  | 2.30E-05  | 2.7058228 |
| EFHD1     | -1.12055  | 4.7402621 | -3.638661 | 0.0003236 | 0.0007126 | -0.743911 |
| NDRG2     | -1.118082 | 9.2919751 | -6.927939 | 2.70E-11  | 1.49E-10  | 14.969815 |
| TRPM8     | -1.116047 | 5.3549279 | -4.762    | 3.01E-06  | 8.69E-06  | 3.6927723 |
| GATM      | -1.114867 | 12.008413 | -4.282867 | 2.50E-05  | 6.40E-05  | 1.6720417 |
| WNT11     | -1.114183 | 4.1909307 | -4.824704 | 2.26E-06  | 6.61E-06  | 3.9708674 |
| SARDH     | -1.112235 | 6.7128403 | -5.907754 | 9.58E-09  | 3.82E-08  | 9.2465904 |
| LDHD      | -1.105696 | 8.8551596 | -5.20774  | 3.60E-07  | 1.18E-06  | 5.7362168 |
| RANBP3L   | -1.100751 | 1.8773466 | -8.643752 | 3.56E-16  | 3.98E-15  | 25.992971 |
| CD302     | -1.099757 | 7.2771969 | -6.743137 | 8.21E-11  | 4.22E-10  | 13.882966 |
| PPP1R3B   | -1.099405 | 6.5368247 | -5.331647 | 1.94E-07  | 6.60E-07  | 6.3313081 |
| TNFRSF11B | -1.096262 | 5.375934  | -3.755041 | 0.0002089 | 0.0004725 | -0.333721 |
| CYP4V2    | -1.096212 | 7.5171251 | -6.145558 | 2.59E-09  | 1.11E-08  | 10.518707 |
| RNF152    | -1.093843 | 4.5924308 | -6.896247 | 3.27E-11  | 1.78E-10  | 14.78192  |
| FOXO1     | -1.091384 | 6.3561576 | -7.208598 | 4.79E-12  | 2.95E-11  | 16.660409 |
| SLC38A2   | -1.090582 | 7.2198013 | -6.054442 | 4.29E-09  | 1.79E-08  | 10.026673 |
| C1RL      | -1.090136 | 7.6721052 | -7.845685 | 8.04E-14  | 6.40E-13  | 20.667877 |
| ETS2      | -1.08894  | 8.0458405 | -7.076316 | 1.09E-11  | 6.38E-11  | 15.857669 |
| DCXR      | -1.086132 | 12.076579 | -4.373709 | 1.70E-05  | 4.45E-05  | 2.0408042 |
| RCL1      | -1.08556  | 8.5076818 | -6.382123 | 6.78E-10  | 3.11E-09  | 11.822429 |
| ALDH1B1   | -1.084147 | 8.2356324 | -5.698283 | 2.94E-08  | 1.10E-07  | 8.1588501 |
| G6PC      | -1.081699 | 9.4685756 | -3.203606 | 0.0015063 | 0.0029814 | -2.171899 |
| SLC2A2    | -1.081048 | 9.8755721 | -3.573749 | 0.0004111 | 0.00089   | -0.967576 |
| SCP2      | -1.078946 | 9.0301275 | -5.252292 | 2.89E-07  | 9.56E-07  | 5.9488574 |
| GLOD5     | -1.07584  | 4.8627585 | -6.604062 | 1.87E-10  | 9.18E-10  | 13.079222 |
| HEPACAM   | -1.075181 | 3.5682942 | -3.484503 | 0.0005681 | 0.0012012 | -1.269054 |
| PCK2      | -1.075015 | 10.474092 | -4.9343   | 1.35E-06  | 4.08E-06  | 4.4643625 |
| CNTFR     | -1.074416 | 3.288875  | -3.633426 | 0.00033   | 0.0007255 | -0.762086 |

|          |           |           |           |           |           |           |
|----------|-----------|-----------|-----------|-----------|-----------|-----------|
| GRAMD1C  | -1.074208 | 5.0724909 | -5.783288 | 1.87E-08  | 7.20E-08  | 8.5965068 |
| LYPD2    | -1.070215 | 1.9518703 | -8.474176 | 1.16E-15  | 1.20E-14  | 24.834984 |
| GSPT2    | -1.064409 | 5.0529647 | -4.394483 | 1.55E-05  | 4.09E-05  | 2.1260892 |
| TKFC     | -1.06369  | 7.4352537 | -4.898839 | 1.59E-06  | 4.76E-06  | 4.3036572 |
| UGT2B15  | -1.06365  | 10.067579 | -2.739782 | 0.0065237 | 0.0115792 | -3.506899 |
| HAAO     | -1.063139 | 7.1100267 | -5.656441 | 3.66E-08  | 1.36E-07  | 7.9453235 |
| PEMT     | -1.058183 | 8.6291713 | -6.742386 | 8.24E-11  | 4.24E-10  | 13.878591 |
| CAT      | -1.057609 | 10.849035 | -6.047399 | 4.46E-09  | 1.85E-08  | 9.9888791 |
| SERPINF2 | -1.056252 | 9.7373295 | -4.489103 | 1.03E-05  | 2.77E-05  | 2.5190029 |
| A2M      | -1.052521 | 13.169482 | -3.789614 | 0.000183  | 0.0004177 | -0.209605 |
| MRO      | -1.052399 | 2.6920221 | -9.510648 | 7.11E-19  | 1.23E-17  | 32.115651 |
| ADRA2B   | -1.043524 | 3.2309493 | -9.714765 | 1.57E-19  | 3.06E-18  | 33.603014 |
| NROB2    | -1.042561 | 8.523304  | -3.976196 | 8.82E-05  | 0.0002101 | 0.4779381 |
| ALDH1L1  | -1.040672 | 8.1159892 | -2.640213 | 0.0087278 | 0.0151369 | -3.767742 |
| RIDA     | -1.039864 | 11.372702 | -5.535622 | 6.87E-08  | 2.45E-07  | 7.3358875 |
| PANK1    | -1.035147 | 5.2092952 | -6.777552 | 6.68E-11  | 3.48E-10  | 14.083749 |
| SLC04C1  | -1.034803 | 2.4232683 | -5.056731 | 7.52E-07  | 2.35E-06  | 5.0267153 |
| MTPP     | -1.033388 | 9.1861548 | -3.588703 | 0.0003892 | 0.0008456 | -0.916374 |
| LHX2     | -1.032575 | 4.1441913 | -8.686402 | 2.64E-16  | 3.01E-15  | 26.28636  |
| LEPR     | -1.031994 | 6.2433024 | -3.298813 | 0.0010903 | 0.0022092 | -1.87377  |
| NR4A2    | -1.030584 | 3.3326118 | -4.74691  | 3.23E-06  | 9.28E-06  | 3.6263142 |
| HSD17B2  | -1.029383 | 10.064746 | -3.685387 | 0.0002718 | 0.000605  | -0.580633 |
| DEPDC7   | -1.027821 | 7.391935  | -5.294692 | 2.34E-07  | 7.85E-07  | 6.1526126 |
| SERPINA7 | -1.027333 | 9.7526428 | -2.52084  | 0.0122365 | 0.0206351 | -4.068316 |
| SULT1B1  | -1.024314 | 3.9568159 | -3.912001 | 0.0001138 | 0.000267  | 0.2380231 |
| ASPA     | -1.021474 | 3.9488492 | -7.962322 | 3.71E-14  | 3.12E-13  | 21.425811 |
| AR       | -1.020541 | 7.4784617 | -3.949012 | 9.83E-05  | 0.0002326 | 0.3759129 |
| IL1RL1   | -1.018808 | 1.3944255 | -9.777211 | 9.88E-20  | 1.98E-18  | 34.061281 |
| AOC1     | -1.018296 | 3.0614304 | -4.933285 | 1.36E-06  | 4.10E-06  | 4.4597466 |
| SCGB3A1  | -1.018236 | 3.5673962 | -6.937371 | 2.55E-11  | 1.41E-10  | 15.025852 |
| ATF3     | -1.015607 | 5.829473  | -5.258123 | 2.80E-07  | 9.31E-07  | 5.9767945 |
| UPB1     | -1.013505 | 9.2141163 | -3.257779 | 0.0012544 | 0.0025155 | -2.003258 |
| ST3GAL6  | -1.012721 | 6.2287359 | -5.398676 | 1.39E-07  | 4.79E-07  | 6.6580225 |
| EDNRB    | -1.010907 | 5.2216761 | -5.399685 | 1.38E-07  | 4.76E-07  | 6.6629708 |
| JUNB     | -1.010683 | 7.9680085 | -5.093533 | 6.29E-07  | 1.99E-06  | 5.1980201 |
| MTHFD1   | -1.010427 | 10.18633  | -4.969117 | 1.14E-06  | 3.49E-06  | 4.6231036 |
| CFI      | -1.009169 | 10.490882 | -5.611461 | 4.64E-08  | 1.69E-07  | 7.7171949 |
| SLC17A2  | -1.007935 | 6.9243655 | -3.704465 | 0.000253  | 0.0005656 | -0.513425 |
| SLC4A4   | -1.00349  | 4.5875747 | -4.513066 | 9.25E-06  | 2.51E-05  | 2.6196651 |
| SIGLEC7  | -1.001002 | 3.7347745 | -7.428081 | 1.20E-12  | 8.03E-12  | 18.015044 |
| UGT2B17  | -1.00095  | 7.6537939 | -2.411167 | 0.0165147 | 0.0271542 | -4.33272  |
| STK25    | 1.0000801 | 7.8071761 | 10.751117 | 5.89E-23  | 2.21E-21  | 41.388789 |
| KIF14    | 1.0006313 | 2.3452257 | 7.4495939 | 1.05E-12  | 7.06E-12  | 18.149319 |
| EXTL3    | 1.0006427 | 5.090318  | 7.4308867 | 1.18E-12  | 7.90E-12  | 18.032542 |
| THOC6    | 1.0007184 | 5.9786944 | 9.618516  | 3.21E-19  | 5.84E-18  | 32.899626 |
| TBX2     | 1.0009742 | 6.1864237 | 5.8616532 | 1.23E-08  | 4.82E-08  | 9.0045315 |
| TCAP     | 1.000997  | 5.2092764 | 4.9488656 | 1.26E-06  | 3.82E-06  | 4.5306554 |
| CCT2     | 1.0010359 | 9.8911234 | 8.4017821 | 1.90E-15  | 1.91E-14  | 24.344842 |
| TMEM38B  | 1.0014092 | 6.0755443 | 7.8592791 | 7.35E-14  | 5.88E-13  | 20.755841 |
| PAK1     | 1.0014506 | 5.8909594 | 6.3249091 | 9.41E-10  | 4.26E-09  | 11.503686 |
| CXCL10   | 1.001582  | 7.3197395 | 2.8266179 | 0.0050268 | 0.0091115 | -3.271933 |

|           |           |           |           |          |          |           |
|-----------|-----------|-----------|-----------|----------|----------|-----------|
| LOX       | 1.0017442 | 3.2378321 | 4.997508  | 9.99E-07 | 3.08E-06 | 4.753241  |
| GMPS      | 1.0017544 | 6.8278144 | 8.1460443 | 1.09E-14 | 9.79E-14 | 22.634176 |
| RAD51C    | 1.0018945 | 6.1566822 | 9.6240829 | 3.08E-19 | 5.64E-18 | 32.940211 |
| CCT4      | 1.0019226 | 10.617747 | 9.3387844 | 2.50E-18 | 3.93E-17 | 30.876234 |
| CDC23     | 1.0020727 | 5.5914167 | 8.7278323 | 1.98E-16 | 2.28E-15 | 26.572172 |
| MLLT6     | 1.0022308 | 5.1518351 | 7.0736152 | 1.11E-11 | 6.48E-11 | 15.84139  |
| SEC61A1   | 1.0023548 | 9.4623356 | 9.0827089 | 1.59E-17 | 2.18E-16 | 29.052343 |
| CSNK1D    | 1.0023648 | 8.2090338 | 9.1051079 | 1.36E-17 | 1.88E-16 | 29.210761 |
| SRGAP2    | 1.00241   | 6.4685018 | 7.8050118 | 1.05E-13 | 8.22E-13 | 20.405284 |
| BOD1      | 1.0024256 | 6.5846803 | 10.21556  | 3.64E-21 | 9.42E-20 | 37.318861 |
| NOP58     | 1.0024322 | 9.0641722 | 8.5593558 | 6.41E-16 | 6.91E-15 | 25.414934 |
| POLRMT    | 1.0025093 | 8.0859178 | 12.147729 | 8.60E-28 | 7.72E-26 | 52.392069 |
| OAZ3      | 1.0026631 | 3.9767581 | 8.5397592 | 7.35E-16 | 7.86E-15 | 25.2812   |
| SGSM3     | 1.0031935 | 7.8540666 | 10.257622 | 2.64E-21 | 7.10E-20 | 37.635056 |
| CPSF6     | 1.0035218 | 4.9629751 | 8.3442743 | 2.82E-15 | 2.77E-14 | 23.957319 |
| PTOV1-AS2 | 1.0036026 | 4.0200213 | 7.133857  | 7.63E-12 | 4.57E-11 | 16.205568 |
| PRKCA     | 1.0036993 | 5.530039  | 6.9712503 | 2.07E-11 | 1.16E-10 | 15.227592 |
| LLGL2     | 1.0038325 | 7.1246046 | 6.9690216 | 2.10E-11 | 1.18E-10 | 15.214299 |
| UBE2Q2    | 1.0044901 | 4.178863  | 5.9330605 | 8.35E-09 | 3.35E-08 | 9.3801011 |
| FAM168B   | 1.0045629 | 7.3398971 | 7.0339311 | 1.41E-11 | 8.15E-11 | 15.602683 |
| GAPDH     | 1.0045758 | 13.01566  | 7.5278761 | 6.35E-13 | 4.42E-12 | 18.640148 |
| B3GNT5    | 1.0046527 | 4.4974412 | 4.9702985 | 1.14E-06 | 3.47E-06 | 4.628505  |
| LUC7L3    | 1.004898  | 6.7938045 | 8.1753131 | 8.91E-15 | 8.11E-14 | 22.828289 |
| SGO2      | 1.0050154 | 3.2341346 | 7.6957937 | 2.15E-13 | 1.60E-12 | 19.704595 |
| SHCBP1    | 1.0050418 | 2.7810022 | 7.1079993 | 8.95E-12 | 5.31E-11 | 16.048984 |
| MVB12A    | 1.0052873 | 6.8897219 | 8.6101905 | 4.50E-16 | 4.95E-15 | 25.7627   |
| HNRNPH1   | 1.0053086 | 7.9095241 | 7.2839802 | 2.99E-12 | 1.90E-11 | 17.122498 |
| NUP107    | 1.0053129 | 6.9698839 | 7.6347577 | 3.19E-13 | 2.31E-12 | 19.315867 |
| RUVBL2    | 1.0053924 | 8.3580123 | 11.481363 | 1.86E-25 | 1.08E-23 | 47.078766 |
| RGP1      | 1.0053945 | 5.4179409 | 8.0571726 | 1.97E-14 | 1.73E-13 | 22.047467 |
| ZNF544    | 1.0059502 | 5.1478706 | 8.8768866 | 6.91E-17 | 8.61E-16 | 27.606985 |
| SEMA5B    | 1.0060902 | 4.5105025 | 8.2710371 | 4.65E-15 | 4.43E-14 | 23.466176 |
| MIF       | 1.0062227 | 11.109185 | 4.5952322 | 6.42E-06 | 1.78E-05 | 2.9683663 |
| MED12     | 1.006231  | 5.1976309 | 6.9466031 | 2.41E-11 | 1.34E-10 | 15.080757 |
| VAMP1     | 1.0065102 | 2.8873196 | 7.1093388 | 8.88E-12 | 5.27E-11 | 16.057086 |
| CPSF3     | 1.0067013 | 6.4149189 | 11.721949 | 2.70E-26 | 1.78E-24 | 48.984847 |
| THEM4     | 1.006918  | 4.6861825 | 9.6420631 | 2.70E-19 | 5.00E-18 | 33.071375 |
| PTGES2    | 1.0069937 | 6.8135547 | 9.5920598 | 3.90E-19 | 6.95E-18 | 32.706918 |
| BAP1      | 1.0073142 | 7.3866054 | 9.6215972 | 3.14E-19 | 5.72E-18 | 32.922088 |
| IFT81     | 1.0076345 | 2.6082848 | 7.4958689 | 7.80E-13 | 5.36E-12 | 18.439043 |
| EEF1D     | 1.0078695 | 9.1765947 | 8.4423245 | 1.44E-15 | 1.47E-14 | 24.619017 |
| UBR5      | 1.0079957 | 5.1285414 | 7.3472676 | 2.01E-12 | 1.30E-11 | 17.513014 |
| DMPK      | 1.0084265 | 5.6866231 | 6.2129267 | 1.77E-09 | 7.76E-09 | 10.886147 |
| LLGL1     | 1.0084793 | 3.3618996 | 7.2313174 | 4.16E-12 | 2.59E-11 | 16.799326 |
| SLC35B2   | 1.0089496 | 8.7661365 | 7.6408742 | 3.06E-13 | 2.23E-12 | 19.354729 |
| GOLT1B    | 1.0090903 | 5.7543703 | 9.0567414 | 1.92E-17 | 2.59E-16 | 28.86896  |
| ZNF579    | 1.009345  | 9.3207535 | 7.1157677 | 8.53E-12 | 5.08E-11 | 16.095984 |
| GUK1      | 1.009369  | 11.1935   | 10.539375 | 3.04E-22 | 9.58E-21 | 39.768491 |
| RIT1      | 1.0096223 | 5.369901  | 8.0065944 | 2.77E-14 | 2.37E-13 | 21.715389 |
| RBM8A     | 1.009672  | 7.3018001 | 10.828237 | 3.23E-23 | 1.27E-21 | 41.982403 |
| FBXO46    | 1.0096845 | 6.45469   | 7.4738002 | 8.98E-13 | 6.10E-12 | 18.300721 |

|          |           |           |           |          |          |           |
|----------|-----------|-----------|-----------|----------|----------|-----------|
| ACD      | 1.0096901 | 6.0923441 | 9.7552958 | 1.16E-19 | 2.31E-18 | 33.900287 |
| APOLD1   | 1.0097266 | 5.7390004 | 5.317192  | 2.09E-07 | 7.06E-07 | 6.2612884 |
| IKBKE    | 1.0097387 | 3.5239895 | 5.3746312 | 1.56E-07 | 5.38E-07 | 6.5404385 |
| PIDD1    | 1.0098176 | 6.0065629 | 9.331612  | 2.63E-18 | 4.12E-17 | 30.824772 |
| IK       | 1.0103107 | 9.2811483 | 11.898842 | 6.48E-27 | 4.81E-25 | 50.39533  |
| ERCC2    | 1.0104865 | 6.070515  | 10.028    | 1.51E-20 | 3.49E-19 | 35.916482 |
| HLA-A    | 1.0117091 | 10.724184 | 5.8793497 | 1.12E-08 | 4.41E-08 | 9.0972731 |
| ACACA    | 1.0119699 | 3.6968948 | 7.7667799 | 1.35E-13 | 1.04E-12 | 20.159268 |
| COL8A1   | 1.011981  | 4.1531124 | 5.2404624 | 3.06E-07 | 1.01E-06 | 5.8922487 |
| MDM4     | 1.0120443 | 4.4956315 | 7.6547661 | 2.80E-13 | 2.05E-12 | 19.44307  |
| KXD1     | 1.0120603 | 8.2208714 | 12.588076 | 2.34E-29 | 2.83E-27 | 55.957051 |
| CANX     | 1.0121439 | 8.234054  | 7.965411  | 3.64E-14 | 3.07E-13 | 21.445982 |
| BCAN     | 1.0121478 | 2.7114972 | 6.136115  | 2.73E-09 | 1.16E-08 | 10.467452 |
| SART1    | 1.0122613 | 7.9691387 | 12.590426 | 2.29E-29 | 2.80E-27 | 55.97618  |
| ZNF623   | 1.0123287 | 3.8090845 | 7.9216632 | 4.86E-14 | 4.02E-13 | 21.16078  |
| NKIRAS2  | 1.0123859 | 6.6527199 | 9.6688239 | 2.21E-19 | 4.19E-18 | 33.266828 |
| SMG7     | 1.0127758 | 6.8910465 | 8.6431591 | 3.58E-16 | 4.00E-15 | 25.988896 |
| SEC11C   | 1.0131339 | 11.045325 | 7.7956729 | 1.12E-13 | 8.72E-13 | 20.345117 |
| LINGO1   | 1.0131432 | 5.1203897 | 4.6443351 | 5.15E-06 | 1.44E-05 | 3.1793487 |
| LMAN2    | 1.0132048 | 11.167734 | 12.393153 | 1.16E-28 | 1.20E-26 | 54.374141 |
| CCDC14   | 1.013253  | 6.4306139 | 6.8661956 | 3.92E-11 | 2.11E-10 | 14.604328 |
| DNAAF5   | 1.0134745 | 6.3399113 | 8.2144235 | 6.84E-15 | 6.33E-14 | 23.088354 |
| WHRN     | 1.0135017 | 3.2368553 | 8.1853627 | 8.32E-15 | 7.61E-14 | 22.89504  |
| SEMA7A   | 1.0140164 | 2.5505992 | 5.7809212 | 1.90E-08 | 7.29E-08 | 8.5842494 |
| TRMT112  | 1.0141038 | 10.674197 | 11.669001 | 4.13E-26 | 2.69E-24 | 48.564116 |
| TMEM160  | 1.0142028 | 7.3786027 | 7.8093689 | 1.02E-13 | 8.01E-13 | 20.433372 |
| RPIA     | 1.0142362 | 7.063806  | 9.1917172 | 7.27E-18 | 1.06E-16 | 29.825344 |
| PA2G4    | 1.0142761 | 8.2257674 | 10.582561 | 2.18E-22 | 7.10E-21 | 40.097807 |
| STAG3L4  | 1.0143496 | 3.2770232 | 7.953017  | 3.95E-14 | 3.31E-13 | 21.36508  |
| RPL13P5  | 1.0144909 | 4.9081681 | 6.8485722 | 4.36E-11 | 2.33E-10 | 14.50044  |
| COPS6    | 1.014498  | 9.9406763 | 13.059905 | 4.72E-31 | 8.38E-29 | 59.817686 |
| TCERG1   | 1.0147368 | 5.327211  | 7.9050689 | 5.43E-14 | 4.45E-13 | 21.052863 |
| ATP6V1H  | 1.0147546 | 6.8213965 | 8.16161   | 9.77E-15 | 8.85E-14 | 22.737355 |
| DNAL4    | 1.0149064 | 5.6574081 | 8.1684279 | 9.33E-15 | 8.48E-14 | 22.782587 |
| MYPOP    | 1.0150864 | 6.5627859 | 11.298612 | 7.96E-25 | 4.16E-23 | 45.640839 |
| TMEM165  | 1.0155967 | 6.0321299 | 7.2510577 | 3.68E-12 | 2.30E-11 | 16.920275 |
| AGO2     | 1.0157822 | 5.2787616 | 8.1610369 | 9.81E-15 | 8.88E-14 | 22.733554 |
| UNK      | 1.0158037 | 6.464913  | 8.9862266 | 3.18E-17 | 4.19E-16 | 28.372473 |
| AGPAT1   | 1.0160008 | 7.121718  | 9.3156524 | 2.96E-18 | 4.56E-17 | 30.71034  |
| CALR     | 1.0160603 | 12.258943 | 9.7751212 | 1.00E-19 | 2.01E-18 | 34.045924 |
| STK39    | 1.0160773 | 3.9726924 | 6.1535267 | 2.47E-09 | 1.06E-08 | 10.562011 |
| RPAP1    | 1.0162669 | 7.1242356 | 9.1522307 | 9.66E-18 | 1.37E-16 | 29.544747 |
| ZSCAN16  | 1.0163155 | 4.6069085 | 8.9843009 | 3.22E-17 | 4.24E-16 | 28.358945 |
| ZBTB40   | 1.0163593 | 3.8198419 | 9.1950427 | 7.09E-18 | 1.03E-16 | 29.849006 |
| HSPB11   | 1.0165582 | 8.3549581 | 9.4571757 | 1.05E-18 | 1.77E-17 | 31.728739 |
| CDC42SE1 | 1.0165625 | 6.681307  | 6.6078601 | 1.83E-10 | 8.99E-10 | 13.101008 |
| CENPE    | 1.0167007 | 3.8227592 | 7.7040397 | 2.03E-13 | 1.52E-12 | 19.757269 |
| IQSEC1   | 1.0167658 | 6.1628998 | 8.3452125 | 2.81E-15 | 2.76E-14 | 23.963628 |
| CLIP2    | 1.0168912 | 4.8169957 | 4.5310614 | 8.54E-06 | 2.33E-05 | 2.695569  |
| JRKL     | 1.0173731 | 4.4861029 | 7.3632192 | 1.81E-12 | 1.19E-11 | 17.611811 |
| COX19    | 1.0174652 | 5.2668039 | 9.3621711 | 2.11E-18 | 3.34E-17 | 31.044179 |

|          |           |           |           |           |           |           |
|----------|-----------|-----------|-----------|-----------|-----------|-----------|
| VAMP5    | 1.0176166 | 9.5116715 | 7.8752909 | 6.61E-14  | 5.34E-13  | 20.859577 |
| RPS16    | 1.0177511 | 13.149364 | 8.2000007 | 7.54E-15  | 6.94E-14  | 22.992359 |
| GRPEL2   | 1.0178668 | 5.6116651 | 10.41896  | 7.68E-22  | 2.27E-20  | 38.853466 |
| SNAPC2   | 1.0179995 | 7.2413358 | 10.520125 | 3.53E-22  | 1.09E-20  | 39.62189  |
| P2RX4    | 1.0180276 | 6.4349227 | 6.4173902 | 5.54E-10  | 2.56E-09  | 12.019988 |
| DSTYK    | 1.0186303 | 4.4285529 | 8.1135472 | 1.35E-14  | 1.21E-13  | 22.419166 |
| ANAPC4   | 1.0186715 | 7.3507524 | 9.4320736 | 1.27E-18  | 2.09E-17  | 31.547506 |
| PDCD6    | 1.0187426 | 9.4412352 | 10.920787 | 1.57E-23  | 6.60E-22  | 42.697164 |
| DSCR8    | 1.0189077 | 1.9374839 | 3.4800387 | 0.0005773 | 0.001219  | -1.28395  |
| EXOSC9   | 1.0189505 | 7.1286209 | 9.9464378 | 2.78E-20  | 6.10E-19  | 35.31058  |
| NUP155   | 1.0192594 | 5.1190193 | 8.516106  | 8.65E-16  | 9.14E-15  | 25.120028 |
| XPOT     | 1.0193198 | 6.6030799 | 6.5325528 | 2.84E-10  | 1.36E-09  | 12.67078  |
| ZBED8    | 1.0193559 | 4.1508723 | 8.6668735 | 3.03E-16  | 3.41E-15  | 26.151916 |
| TEAD3    | 1.0194638 | 6.8189223 | 7.2914307 | 2.85E-12  | 1.81E-11  | 17.16835  |
| IFI27    | 1.019634  | 10.892213 | 2.4171609 | 0.0162505 | 0.026754  | -4.318562 |
| LRRC59   | 1.0197168 | 8.8115949 | 8.4553883 | 1.32E-15  | 1.35E-14  | 24.707535 |
| UBL7     | 1.0197285 | 6.2872893 | 11.185261 | 1.95E-24  | 9.50E-23  | 44.753487 |
| TAF9     | 1.0200915 | 7.7142012 | 8.7449779 | 1.75E-16  | 2.05E-15  | 26.690687 |
| PPP1CC   | 1.020201  | 8.3225524 | 9.2331427 | 5.39E-18  | 7.95E-17  | 30.120435 |
| OLA1     | 1.0202946 | 6.2119589 | 9.2520666 | 4.70E-18  | 7.02E-17  | 30.255479 |
| ABHD11   | 1.0204252 | 6.418525  | 7.1786521 | 5.78E-12  | 3.52E-11  | 16.477773 |
| MANEAL   | 1.0205378 | 6.5189649 | 5.6783301 | 3.26E-08  | 1.22E-07  | 8.0568695 |
| SCAF1    | 1.0208074 | 7.1938186 | 10.609379 | 1.77E-22  | 5.93E-21  | 40.302604 |
| ZMYM3    | 1.0209787 | 5.5996523 | 7.7537912 | 1.47E-13  | 1.12E-12  | 20.075869 |
| AMDHD2   | 1.021093  | 5.4892032 | 8.8403467 | 8.95E-17  | 1.10E-15  | 27.352368 |
| EIF3E    | 1.0211552 | 9.5796576 | 6.6609968 | 1.34E-10  | 6.68E-10  | 13.406771 |
| DHX37    | 1.0215108 | 6.2148819 | 8.8251234 | 9.97E-17  | 1.21E-15  | 27.246468 |
| CNOT11   | 1.0216253 | 7.0039916 | 8.3089835 | 3.59E-15  | 3.48E-14  | 23.720318 |
| PIK3IP1  | 1.0216293 | 5.9763673 | 5.1291494 | 5.29E-07  | 1.69E-06  | 5.3647925 |
| PLXNA3   | 1.0218547 | 3.377998  | 6.1621182 | 2.36E-09  | 1.02E-08  | 10.608745 |
| ZBED5    | 1.0227619 | 5.4382825 | 7.6095386 | 3.75E-13  | 2.70E-12  | 19.155853 |
| DYNC1H1  | 1.0228983 | 8.4691947 | 9.144794  | 1.02E-17  | 1.44E-16  | 29.491975 |
| HSP90AA1 | 1.0232381 | 10.590642 | 8.3746757 | 2.29E-15  | 2.28E-14  | 24.161979 |
| MMS19    | 1.0233533 | 6.7760695 | 9.5420934 | 5.64E-19  | 9.83E-18  | 32.343715 |
| TAF11    | 1.0234552 | 7.5069381 | 10.090414 | 9.40E-21  | 2.28E-19  | 36.381767 |
| LZTR1    | 1.0235124 | 6.5609876 | 9.4923351 | 8.13E-19  | 1.39E-17  | 31.983012 |
| PUSL1    | 1.0236422 | 6.8164504 | 8.0437264 | 2.16E-14  | 1.88E-13  | 21.959054 |
| RAN      | 1.0237484 | 9.45695   | 8.43115   | 1.56E-15  | 1.58E-14  | 24.543367 |
| SH2B1    | 1.0237609 | 5.8946628 | 9.2493752 | 4.79E-18  | 7.13E-17  | 30.236263 |
| GGH      | 1.0239191 | 9.8290089 | 4.223193  | 3.22E-05  | 8.12E-05  | 1.4335186 |
| PTGFRN   | 1.0240481 | 4.912883  | 5.4455691 | 1.09E-07  | 3.82E-07  | 6.8885806 |
| IFI27L2  | 1.0242595 | 7.1396698 | 4.7485022 | 3.21E-06  | 9.21E-06  | 3.6333162 |
| MYH4     | 1.0242697 | 2.6061472 | 2.4343135 | 0.0155152 | 0.0256393 | -4.277857 |
| FANCA    | 1.0245417 | 4.6005023 | 7.485561  | 8.33E-13  | 5.70E-12  | 18.374401 |
| RPS6KA4  | 1.0247885 | 6.1524793 | 9.3279557 | 2.71E-18  | 4.21E-17  | 30.798547 |
| PPDPF    | 1.0249287 | 11.014765 | 4.2271059 | 3.16E-05  | 8.00E-05  | 1.4490683 |
| MGAT5    | 1.0250894 | 2.7433716 | 6.8071532 | 5.59E-11  | 2.95E-10  | 14.257043 |
| TMEM164  | 1.0251023 | 5.4968864 | 7.4608041 | 9.76E-13  | 6.59E-12  | 18.219393 |
| TM4SF20  | 1.0251273 | 1.8640592 | 3.2056095 | 0.0014962 | 0.0029621 | -2.16571  |
| B3GNT3   | 1.025259  | 5.8890768 | 3.1798532 | 0.0016308 | 0.0032076 | -2.245012 |
| VPS16    | 1.0253193 | 7.6992111 | 11.99626  | 2.94E-27  | 2.35E-25  | 51.175227 |

|            |           |           |           |           |           |           |
|------------|-----------|-----------|-----------|-----------|-----------|-----------|
| IQCC       | 1.0255824 | 3.3934906 | 9.7887437 | 9.07E-20  | 1.83E-18  | 34.146082 |
| TUBG2      | 1.0256768 | 5.1932214 | 8.4272294 | 1.60E-15  | 1.62E-14  | 24.51684  |
| CRTAP      | 1.0263823 | 6.4072257 | 7.2628081 | 3.41E-12  | 2.15E-11  | 16.992377 |
| GON4L      | 1.0267457 | 5.0056134 | 8.2813268 | 4.34E-15  | 4.16E-14  | 23.535019 |
| AP3B1      | 1.0272072 | 6.8688144 | 9.0570797 | 1.91E-17  | 2.59E-16  | 28.871348 |
| PREB       | 1.0272881 | 9.151568  | 8.2781475 | 4.43E-15  | 4.23E-14  | 23.513742 |
| CYB561D1   | 1.027421  | 5.6359856 | 8.6851189 | 2.67E-16  | 3.03E-15  | 26.27752  |
| TTL        | 1.0282301 | 3.4765405 | 9.8645119 | 5.15E-20  | 1.08E-18  | 34.704436 |
| HSDL1      | 1.0283985 | 4.3314318 | 8.3749226 | 2.29E-15  | 2.27E-14  | 24.163643 |
| LENG8      | 1.0288068 | 5.654832  | 7.0868871 | 1.02E-11  | 6.01E-11  | 15.921435 |
| CLCN2      | 1.0288252 | 4.5552634 | 7.8998715 | 5.62E-14  | 4.59E-13  | 21.019093 |
| PRKAB2     | 1.0288593 | 7.1218865 | 6.5513454 | 2.55E-10  | 1.23E-09  | 12.777799 |
| ERMP1      | 1.028915  | 5.3733612 | 6.2758654 | 1.24E-09  | 5.55E-09  | 11.232194 |
| BYSL       | 1.0296504 | 7.1587689 | 8.2985478 | 3.86E-15  | 3.72E-14  | 23.650354 |
| FLYWCH1    | 1.0297958 | 5.2903529 | 8.882285  | 6.65E-17  | 8.31E-16  | 27.644654 |
| NCOR2      | 1.0300783 | 8.7625542 | 7.4541422 | 1.02E-12  | 6.86E-12  | 18.177742 |
| MIF4GD     | 1.0301357 | 6.1795034 | 9.0493996 | 2.02E-17  | 2.71E-16  | 28.817166 |
| PTPN23     | 1.0303103 | 5.792847  | 8.9080584 | 5.54E-17  | 7.01E-16  | 27.824674 |
| PQBP1      | 1.0305903 | 8.1246711 | 11.013425 | 7.57E-24  | 3.37E-22  | 43.415142 |
| PUS1       | 1.0306363 | 7.4835634 | 9.6029293 | 3.60E-19  | 6.49E-18  | 32.786058 |
| BRAT1      | 1.0306379 | 8.0240759 | 11.127709 | 3.08E-24  | 1.46E-22  | 44.304307 |
| CERS5      | 1.0308294 | 5.4081245 | 9.6346896 | 2.85E-19  | 5.26E-18  | 33.01757  |
| VPS11      | 1.0313898 | 6.3479251 | 9.9070915 | 3.74E-20  | 8.08E-19  | 35.019159 |
| STX16      | 1.0315673 | 6.3890697 | 8.4896456 | 1.04E-15  | 1.08E-14  | 24.940047 |
| BTN2A2     | 1.0318097 | 5.8956254 | 7.3187398 | 2.40E-12  | 1.55E-11  | 17.336694 |
| VNN2       | 1.0318141 | 6.1984774 | 3.5105287 | 0.0005173 | 0.0011011 | -1.18186  |
| FAM110A    | 1.0319525 | 6.4251774 | 7.2353891 | 4.05E-12  | 2.53E-11  | 16.824255 |
| CCDC18-AS1 | 1.0320155 | 5.17788   | 7.8735408 | 6.69E-14  | 5.39E-13  | 20.848232 |
| MXD4       | 1.0320799 | 7.2445345 | 8.5132182 | 8.83E-16  | 9.31E-15  | 25.100369 |
| DNAJB2     | 1.0322538 | 8.1863849 | 10.106423 | 8.33E-21  | 2.04E-19  | 36.501335 |
| CCDC142    | 1.0325466 | 5.4601043 | 9.5551737 | 5.12E-19  | 8.98E-18  | 32.438699 |
| UQCRH      | 1.0326933 | 11.077134 | 8.7267358 | 1.99E-16  | 2.30E-15  | 26.564597 |
| SYNGR2     | 1.0328729 | 9.7596975 | 8.4213454 | 1.66E-15  | 1.68E-14  | 24.477042 |
| HMGN4      | 1.0329031 | 6.8124045 | 5.8050926 | 1.67E-08  | 6.43E-08  | 8.7095988 |
| RCE1       | 1.0330038 | 5.3675439 | 8.4913294 | 1.03E-15  | 1.07E-14  | 24.95149  |
| SFSWAP     | 1.0331414 | 6.4356145 | 9.8257861 | 6.88E-20  | 1.41E-18  | 34.418786 |
| SAAL1      | 1.0332092 | 6.1727925 | 9.9564929 | 2.58E-20  | 5.72E-19  | 35.385146 |
| STIL       | 1.0332838 | 2.3211064 | 7.6879877 | 2.26E-13  | 1.68E-12  | 19.654765 |
| PRIM2      | 1.0333785 | 3.966142  | 9.7731241 | 1.02E-19  | 2.04E-18  | 34.031247 |
| GAL3ST1    | 1.0334049 | 5.4319698 | 3.4815031 | 0.0005743 | 0.0012132 | -1.279066 |
| HARS2      | 1.0334197 | 7.4936869 | 10.940186 | 1.35E-23  | 5.77E-22  | 42.847303 |
| C15orf41   | 1.0334365 | 4.9899396 | 8.2581392 | 5.08E-15  | 4.82E-14  | 23.379957 |
| IER5       | 1.0334489 | 8.5050177 | 7.1520608 | 6.81E-12  | 4.11E-11  | 16.316043 |
| NAP1L1     | 1.0335481 | 6.1255601 | 7.2200858 | 4.46E-12  | 2.76E-11  | 16.730613 |
| DGCR2      | 1.0336985 | 8.8538808 | 8.0741436 | 1.76E-14  | 1.55E-13  | 22.15919  |
| RCC2       | 1.0338554 | 6.8176051 | 6.4288368 | 5.18E-10  | 2.41E-09  | 12.084285 |
| KIF18A     | 1.0338835 | 2.3929788 | 7.3555642 | 1.90E-12  | 1.24E-11  | 17.564381 |
| CCDC84     | 1.0339204 | 6.701195  | 7.6318323 | 3.25E-13  | 2.35E-12  | 19.297288 |
| RRM1       | 1.0343738 | 7.776552  | 7.4942987 | 7.88E-13  | 5.41E-12  | 18.429192 |
| ITGA2      | 1.0350156 | 2.5441755 | 5.2879757 | 2.42E-07  | 8.10E-07  | 6.1202473 |
| CBX3       | 1.0352483 | 9.6298866 | 8.9519515 | 4.06E-17  | 5.24E-16  | 28.13194  |

|          |           |           |           |           |           |           |
|----------|-----------|-----------|-----------|-----------|-----------|-----------|
| IP6K2    | 1.0366457 | 6.7593732 | 9.7678559 | 1.06E-19  | 2.11E-18  | 33.992536 |
| LAMA5    | 1.0367626 | 5.9332785 | 5.0964671 | 6.20E-07  | 1.96E-06  | 5.2117209 |
| SSNA1    | 1.0369093 | 8.6643902 | 10.22769  | 3.32E-21  | 8.67E-20  | 37.409986 |
| AP4M1    | 1.0372228 | 5.2639644 | 10.280977 | 2.21E-21  | 6.04E-20  | 37.810883 |
| CCNL2    | 1.0374867 | 7.2916996 | 6.697821  | 1.07E-10  | 5.43E-10  | 13.619724 |
| NOP2     | 1.037741  | 6.8014353 | 8.5702884 | 5.94E-16  | 6.44E-15  | 25.489621 |
| RBMX     | 1.0380803 | 6.8036392 | 9.2485798 | 4.82E-18  | 7.16E-17  | 30.230585 |
| ZMAT5    | 1.0383365 | 6.5633126 | 10.313828 | 1.72E-21  | 4.78E-20  | 38.058519 |
| BORCS6   | 1.0386454 | 6.990848  | 10.249811 | 2.80E-21  | 7.50E-20  | 37.576291 |
| SAP130   | 1.0386708 | 4.9764307 | 8.9379592 | 4.48E-17  | 5.76E-16  | 28.033895 |
| METTTL5  | 1.0390412 | 8.3761938 | 11.532383 | 1.24E-25  | 7.41E-24  | 47.481759 |
| DXO      | 1.0390952 | 5.7695452 | 10.683581 | 9.96E-23  | 3.56E-21  | 40.870455 |
| EFTUD2   | 1.0394929 | 8.6666293 | 9.7049339 | 1.69E-19  | 3.28E-18  | 33.531005 |
| RCOR3    | 1.0398088 | 5.520628  | 8.0908095 | 1.57E-14  | 1.39E-13  | 22.26905  |
| PLA2G1B  | 1.0398373 | 4.1998993 | 4.4516716 | 1.21E-05  | 3.24E-05  | 2.3626922 |
| DANCR    | 1.0399918 | 6.6164224 | 5.1241909 | 5.42E-07  | 1.73E-06  | 5.3415159 |
| GCN1     | 1.040271  | 8.5973614 | 9.0680546 | 1.77E-17  | 2.41E-16  | 28.948818 |
| EHD2     | 1.0402883 | 5.4987897 | 5.8843161 | 1.09E-08  | 4.30E-08  | 9.1233396 |
| YY1AP1   | 1.0402888 | 7.8368696 | 9.0846008 | 1.57E-17  | 2.15E-16  | 29.065715 |
| FOXRED2  | 1.0403908 | 5.2716794 | 6.0313716 | 4.87E-09  | 2.01E-08  | 9.902998  |
| ZSWIM5   | 1.0404778 | 3.8295027 | 5.6202156 | 4.43E-08  | 1.62E-07  | 7.7614828 |
| YIPF3    | 1.0405639 | 9.6263082 | 10.675597 | 1.06E-22  | 3.76E-21  | 40.809273 |
| RPL27    | 1.0407163 | 12.820474 | 8.9370448 | 4.51E-17  | 5.78E-16  | 28.027491 |
| DNAJB6   | 1.0407854 | 7.2615787 | 9.5321253 | 6.07E-19  | 1.05E-17  | 32.271376 |
| TRAF7    | 1.0408101 | 6.8696174 | 7.0185916 | 1.55E-11  | 8.89E-11  | 15.510668 |
| LASP1    | 1.0408424 | 7.8669343 | 7.7772109 | 1.26E-13  | 9.73E-13  | 20.226311 |
| HES4     | 1.0411632 | 6.2820218 | 5.7437766 | 2.31E-08  | 8.76E-08  | 8.3924342 |
| SLC22A23 | 1.041188  | 6.5620251 | 7.048487  | 1.29E-11  | 7.49E-11  | 15.690128 |
| CABLES2  | 1.0411944 | 4.5164656 | 7.1463103 | 7.06E-12  | 4.25E-11  | 16.281122 |
| TTLL1    | 1.0415798 | 4.2692752 | 8.8990306 | 5.91E-17  | 7.44E-16  | 27.761583 |
| COPA     | 1.0415912 | 7.3767675 | 7.4873751 | 8.23E-13  | 5.64E-12  | 18.385773 |
| G6PC3    | 1.0416276 | 5.6184923 | 8.3167337 | 3.41E-15  | 3.31E-14  | 23.772313 |
| GTPBP3   | 1.0421534 | 5.9994816 | 10.023308 | 1.56E-20  | 3.61E-19  | 35.881559 |
| PSMC3IP  | 1.0422639 | 3.8966059 | 7.4712034 | 9.13E-13  | 6.20E-12  | 18.284463 |
| NPM2     | 1.042297  | 4.2960828 | 4.53465   | 8.41E-06  | 2.29E-05  | 2.7107367 |
| EEF2KMT  | 1.0426058 | 5.4651635 | 10.619969 | 1.63E-22  | 5.52E-21  | 40.383539 |
| ASXL1    | 1.0426599 | 6.5572095 | 8.2289331 | 6.20E-15  | 5.79E-14  | 23.185033 |
| ZFP62    | 1.0428355 | 6.4317657 | 9.5240214 | 6.44E-19  | 1.11E-17  | 32.212594 |
| EMC2     | 1.0432821 | 7.5524618 | 9.2248679 | 5.72E-18  | 8.42E-17  | 30.061432 |
| DEAF1    | 1.0434445 | 6.5669697 | 10.192652 | 4.33E-21  | 1.11E-19  | 37.146918 |
| SLC26A2  | 1.0435127 | 2.9190085 | 7.9276881 | 4.67E-14  | 3.88E-13  | 21.199998 |
| MIEN1    | 1.0439637 | 9.05909   | 11.571184 | 9.06E-26  | 5.56E-24  | 47.78868  |
| ZNF213   | 1.0442251 | 5.5623161 | 7.4572417 | 9.98E-13  | 6.74E-12  | 18.197117 |
| ZWILCH   | 1.0443393 | 4.6322252 | 7.9597028 | 3.78E-14  | 3.17E-13  | 21.408712 |
| BORCS8   | 1.0450416 | 6.5398313 | 11.318763 | 6.78E-25  | 3.60E-23  | 45.798956 |
| BPIFB2   | 1.0451882 | 4.070512  | 2.8215048 | 0.0051054 | 0.0092418 | -3.285961 |
| SLC39A3  | 1.0457475 | 5.3579966 | 11.871109 | 8.11E-27  | 5.88E-25  | 50.173711 |
| TPGS2    | 1.0458008 | 6.1232262 | 7.5469564 | 5.62E-13  | 3.95E-12  | 18.760307 |
| SCARA3   | 1.0463395 | 4.260477  | 4.9658168 | 1.16E-06  | 3.54E-06  | 4.6080148 |
| TP53BP2  | 1.0465369 | 7.028761  | 6.0799473 | 3.73E-09  | 1.56E-08  | 10.163832 |
| AP3D1    | 1.0468133 | 8.8616943 | 8.4964299 | 9.92E-16  | 1.04E-14  | 24.986161 |

|          |           |           |           |          |           |           |
|----------|-----------|-----------|-----------|----------|-----------|-----------|
| DRAP1    | 1.0472522 | 9.4358828 | 12.314713 | 2.20E-28 | 2.18E-26  | 53.739289 |
| KLHDC8B  | 1.047367  | 6.4567276 | 7.1102529 | 8.83E-12 | 5.24E-11  | 16.062615 |
| RPS7     | 1.0474323 | 12.478736 | 8.9794373 | 3.33E-17 | 4.37E-16  | 28.324787 |
| LYRM4    | 1.0476521 | 5.6117088 | 9.6936131 | 1.84E-19 | 3.55E-18  | 33.448129 |
| INTS7    | 1.0477799 | 5.6001703 | 8.6986568 | 2.43E-16 | 2.77E-15  | 26.370817 |
| DCTPP1   | 1.0480332 | 8.2141283 | 8.9960397 | 2.96E-17 | 3.91E-16  | 28.441435 |
| IFFO1    | 1.0480447 | 7.6440445 | 10.33644  | 1.45E-21 | 4.06E-20  | 38.229181 |
| P3H1     | 1.0480547 | 7.7626453 | 9.463454  | 1.01E-18 | 1.69E-17  | 31.774107 |
| TPRKB    | 1.0480955 | 7.6355848 | 10.731822 | 6.85E-23 | 2.52E-21  | 41.24056  |
| CREB3L2  | 1.048113  | 5.8351577 | 7.393373  | 1.50E-12 | 9.89E-12  | 17.79897  |
| RIC8A    | 1.0483989 | 8.515745  | 10.560131 | 2.59E-22 | 8.29E-21  | 39.926687 |
| NDOR1    | 1.0484821 | 6.9564029 | 8.9042627 | 5.69E-17 | 7.19E-16  | 27.798143 |
| RHBDF1   | 1.0486115 | 6.1291003 | 6.6461969 | 1.46E-10 | 7.25E-10  | 13.321427 |
| ASPH     | 1.0486747 | 6.6535791 | 4.9093848 | 1.52E-06 | 4.55E-06  | 4.3513468 |
| CYTH2    | 1.0487862 | 6.4501097 | 9.5966737 | 3.77E-19 | 6.74E-18  | 32.740506 |
| ABCC4    | 1.0488687 | 2.4578598 | 5.0029428 | 9.73E-07 | 3.00E-06  | 4.7782242 |
| PRPF6    | 1.0489325 | 9.4053891 | 11.680028 | 3.78E-26 | 2.48E-24  | 48.65168  |
| RNF44    | 1.0490385 | 6.2894604 | 7.0349402 | 1.40E-11 | 8.11E-11  | 15.60874  |
| DPF2     | 1.0492007 | 7.2928747 | 9.7135659 | 1.59E-19 | 3.09E-18  | 33.594231 |
| UGGT1    | 1.0492569 | 5.8737871 | 7.8626628 | 7.19E-14 | 5.76E-13  | 20.777751 |
| TCIRG1   | 1.049326  | 8.3102145 | 6.9775562 | 1.99E-11 | 1.12E-10  | 15.265219 |
| BZW2     | 1.049376  | 7.8155334 | 7.1913368 | 5.34E-12 | 3.27E-11  | 16.555071 |
| TIMM17B  | 1.0495792 | 6.2238277 | 11.155613 | 2.47E-24 | 1.19E-22  | 44.521973 |
| PSMD2    | 1.0496905 | 8.8038189 | 9.509989  | 7.14E-19 | 1.23E-17  | 32.110873 |
| SPRYD3   | 1.0501081 | 7.2385885 | 10.065427 | 1.14E-20 | 2.72E-19  | 36.195323 |
| CCDC159  | 1.0502806 | 6.2096646 | 10.535133 | 3.14E-22 | 9.83E-21  | 39.736175 |
| C12orf73 | 1.0504459 | 5.390366  | 12.442648 | 7.72E-29 | 8.37E-27  | 54.775366 |
| TMEM80   | 1.0505985 | 6.3629286 | 8.8522411 | 8.23E-17 | 1.02E-15  | 27.435184 |
| GPR137   | 1.0506266 | 5.6435697 | 9.1667939 | 8.70E-18 | 1.25E-16  | 29.648157 |
| NOL12    | 1.0507052 | 5.0983923 | 10.946112 | 1.28E-23 | 5.53E-22  | 42.893189 |
| DYNC1I1  | 1.0509374 | 3.0958809 | 4.0302661 | 7.10E-05 | 0.0001711 | 0.6827275 |
| PPP1R13L | 1.0514011 | 6.301294  | 6.2550381 | 1.40E-09 | 6.21E-09  | 11.117387 |
| HAX1     | 1.0518137 | 10.218318 | 11.895751 | 6.64E-27 | 4.91E-25  | 50.370625 |
| MED25    | 1.0522744 | 5.5774345 | 9.8628373 | 5.21E-20 | 1.09E-18  | 34.692072 |
| PXMP4    | 1.0526136 | 6.6735289 | 9.1360303 | 1.09E-17 | 1.52E-16  | 29.429818 |
| PTGES3   | 1.0526665 | 8.563505  | 11.234215 | 1.33E-24 | 6.69E-23  | 45.136283 |
| SUGP2    | 1.0527605 | 5.8935419 | 7.5076381 | 7.23E-13 | 5.00E-12  | 18.512923 |
| PPIB     | 1.052878  | 11.054775 | 11.585816 | 8.05E-26 | 4.99E-24  | 47.904526 |
| RUVBL1   | 1.0529836 | 4.9301592 | 9.4056856 | 1.53E-18 | 2.49E-17  | 31.357267 |
| HTATIP2  | 1.0533947 | 7.939145  | 6.8944489 | 3.31E-11 | 1.80E-10  | 14.771279 |
| LAMTOR1  | 1.0535707 | 9.2629566 | 12.239019 | 4.09E-28 | 3.82E-26  | 53.12786  |
| SLC22A5  | 1.0536506 | 6.2160697 | 8.2268654 | 6.28E-15 | 5.86E-14  | 23.171248 |
| MORC2    | 1.0538236 | 6.9885801 | 9.4721605 | 9.43E-19 | 1.59E-17  | 31.837049 |
| RPS18    | 1.0538516 | 12.634209 | 7.5055584 | 7.33E-13 | 5.06E-12  | 18.499862 |
| CASP2    | 1.0541049 | 4.7096732 | 7.0928492 | 9.83E-12 | 5.81E-11  | 15.957428 |
| CETN2    | 1.0542268 | 8.0420403 | 9.1676815 | 8.64E-18 | 1.24E-16  | 29.654463 |
| NACC1    | 1.0545989 | 6.7183702 | 8.9861537 | 3.18E-17 | 4.19E-16  | 28.371961 |
| RPL23A   | 1.054763  | 11.683469 | 8.1579174 | 1.00E-14 | 9.07E-14  | 22.712867 |
| SLC29A1  | 1.0548005 | 8.8086793 | 5.4183144 | 1.25E-07 | 4.36E-07  | 6.754381  |
| INTS3    | 1.0549586 | 6.0782241 | 6.4677009 | 4.14E-10 | 1.95E-09  | 12.303231 |
| XYLT2    | 1.0552208 | 7.8302645 | 8.9581447 | 3.88E-17 | 5.04E-16  | 28.175363 |



|          |           |           |           |           |           |           |
|----------|-----------|-----------|-----------|-----------|-----------|-----------|
| UNC45A   | 1.0553138 | 7.785079  | 9.863926  | 5.17E-20  | 1.09E-18  | 34.70011  |
| PSMD14   | 1.0553576 | 9.1331505 | 9.5512866 | 5.27E-19  | 9.21E-18  | 32.410465 |
| RPS20    | 1.0553584 | 13.176504 | 7.9006011 | 5.59E-14  | 4.57E-13  | 21.023832 |
| KIZ      | 1.0553653 | 5.5371329 | 8.5572581 | 6.51E-16  | 7.01E-15  | 25.40061  |
| LSM7     | 1.0554692 | 9.70817   | 9.3781083 | 1.88E-18  | 3.01E-17  | 31.158757 |
| RAD21    | 1.0554798 | 9.0114763 | 6.9638208 | 2.17E-11  | 1.21E-10  | 15.183292 |
| GBA2     | 1.0555077 | 6.5987719 | 9.2562283 | 4.56E-18  | 6.82E-17  | 30.285198 |
| DDOST    | 1.0556013 | 10.246379 | 9.3269312 | 2.73E-18  | 4.24E-17  | 30.7912   |
| KRI1     | 1.05575   | 7.4960401 | 10.604609 | 1.84E-22  | 6.12E-21  | 40.266165 |
| ENSA     | 1.0557679 | 7.7211975 | 10.67815  | 1.04E-22  | 3.69E-21  | 40.828836 |
| ATIC     | 1.0559366 | 8.3503833 | 9.3256447 | 2.75E-18  | 4.26E-17  | 30.781973 |
| GMEB2    | 1.0559492 | 5.3476869 | 10.465577 | 5.37E-22  | 1.62E-20  | 39.207143 |
| FKBP1A   | 1.056023  | 7.4361364 | 10.233093 | 3.18E-21  | 8.39E-20  | 37.450587 |
| TULP3    | 1.0560562 | 4.5139246 | 7.8623529 | 7.20E-14  | 5.77E-13  | 20.775744 |
| SNRPA1   | 1.0562218 | 7.8559982 | 8.5182536 | 8.53E-16  | 9.01E-15  | 25.134651 |
| PORCN    | 1.0562618 | 6.1468466 | 8.7953827 | 1.23E-16  | 1.47E-15  | 27.039883 |
| SREBF2   | 1.0562932 | 7.3577311 | 6.909808  | 3.01E-11  | 1.65E-10  | 14.862244 |
| C1QTNF6  | 1.0563299 | 5.6811443 | 6.9270093 | 2.71E-11  | 1.49E-10  | 14.964293 |
| DBP      | 1.0565277 | 6.4044766 | 6.699203  | 1.07E-10  | 5.40E-10  | 13.627732 |
| SOX9-AS1 | 1.0567566 | 5.264791  | 5.3990502 | 1.38E-07  | 4.78E-07  | 6.6598582 |
| CPQ      | 1.0568936 | 9.2599003 | 7.9890881 | 3.11E-14  | 2.64E-13  | 21.60076  |
| WDR5     | 1.0573792 | 6.2410547 | 9.0559487 | 1.93E-17  | 2.60E-16  | 28.863366 |
| DROSHA   | 1.0574278 | 7.4889004 | 9.1407342 | 1.05E-17  | 1.48E-16  | 29.463177 |
| NOL3     | 1.0575923 | 8.0732322 | 5.5211401 | 7.41E-08  | 2.64E-07  | 7.2635511 |
| F13A1    | 1.0576286 | 5.3938759 | 4.4922593 | 1.01E-05  | 2.74E-05  | 2.532234  |
| RNASE1   | 1.0576975 | 7.0018514 | 5.3634816 | 1.66E-07  | 5.67E-07  | 6.4860597 |
| UNC119   | 1.0577228 | 6.4294974 | 6.0439938 | 4.55E-09  | 1.89E-08  | 9.9706181 |
| BTG3     | 1.0581062 | 5.2352634 | 7.5463505 | 5.64E-13  | 3.96E-12  | 18.756488 |
| TEF      | 1.0582288 | 5.2918813 | 6.5194929 | 3.07E-10  | 1.46E-09  | 12.596543 |
| MEGF8    | 1.0583848 | 6.0473398 | 7.780836  | 1.23E-13  | 9.53E-13  | 20.249625 |
| FBX044   | 1.0588616 | 5.7628346 | 7.9441678 | 4.19E-14  | 3.50E-13  | 21.307367 |
| FTSJ1    | 1.0590829 | 5.8379353 | 10.047403 | 1.30E-20  | 3.07E-19  | 36.06098  |
| DAXX     | 1.0592716 | 6.5480898 | 10.660364 | 1.19E-22  | 4.16E-21  | 40.692598 |
| SOX18    | 1.0592848 | 7.0117223 | 7.1899222 | 5.38E-12  | 3.29E-11  | 16.546446 |
| FDCSP    | 1.0600502 | 3.3524332 | 2.7165733 | 0.0069869 | 0.0123334 | -3.568521 |
| NUP133   | 1.0601612 | 7.0350905 | 9.2619842 | 4.37E-18  | 6.58E-17  | 30.326313 |
| TATDN2   | 1.0602724 | 6.1952661 | 10.894043 | 1.93E-23  | 7.96E-22  | 42.490353 |
| PSME3    | 1.0603347 | 6.5839102 | 8.6139351 | 4.39E-16  | 4.83E-15  | 25.788366 |
| OTUD6B   | 1.0606665 | 4.1253288 | 8.2560938 | 5.15E-15  | 4.87E-14  | 23.366292 |
| RBBP7    | 1.0608365 | 9.373571  | 9.3477275 | 2.34E-18  | 3.70E-17  | 30.940429 |
| ITGB3BP  | 1.0608435 | 5.2424326 | 8.5827219 | 5.45E-16  | 5.92E-15  | 25.574631 |
| TMEM258  | 1.060849  | 10.920402 | 11.196217 | 1.79E-24  | 8.79E-23  | 44.839097 |
| ENTPD2   | 1.060986  | 5.6033197 | 5.2095731 | 3.57E-07  | 1.17E-06  | 5.7449365 |
| RPN2     | 1.0609878 | 10.146717 | 11.501293 | 1.58E-25  | 9.34E-24  | 47.236102 |
| EIF3D    | 1.0611856 | 10.617985 | 9.2356304 | 5.29E-18  | 7.82E-17  | 30.138179 |
| SAMD4B   | 1.0613023 | 4.4863872 | 9.5100454 | 7.14E-19  | 1.23E-17  | 32.111282 |
| RHBDD3   | 1.0615884 | 7.0521996 | 9.6480818 | 2.58E-19  | 4.82E-18  | 33.11531  |
| SAMD10   | 1.0616621 | 5.5273356 | 9.8414748 | 6.12E-20  | 1.27E-18  | 34.534442 |
| GAPLINC  | 1.0618326 | 3.7020008 | 4.784323  | 2.72E-06  | 7.89E-06  | 3.7914201 |
| GPR107   | 1.062013  | 6.0837578 | 7.9042069 | 5.46E-14  | 4.48E-13  | 21.047261 |
| RNPC3    | 1.0623542 | 5.598285  | 7.1292732 | 7.85E-12  | 4.69E-11  | 16.177781 |

|           |           |           |           |          |           |           |
|-----------|-----------|-----------|-----------|----------|-----------|-----------|
| FAM122B   | 1.0624397 | 4.9599085 | 7.1177792 | 8.43E-12 | 5.02E-11  | 16.108161 |
| GPS1      | 1.0624939 | 8.682368  | 11.852496 | 9.43E-27 | 6.75E-25  | 50.025065 |
| MAP4K4    | 1.0625121 | 6.2986173 | 7.3953607 | 1.48E-12 | 9.79E-12  | 17.811326 |
| MEF2D     | 1.0629352 | 5.8618139 | 8.921247  | 5.05E-17 | 6.42E-16  | 27.916908 |
| C19orf53  | 1.0632764 | 8.7579903 | 10.254182 | 2.71E-21 | 7.28E-20  | 37.609173 |
| ULK3      | 1.0634878 | 7.567294  | 8.5687683 | 6.01E-16 | 6.50E-15  | 25.479233 |
| KDELR3    | 1.0635004 | 6.5711127 | 4.3387968 | 1.97E-05 | 5.12E-05  | 1.8982776 |
| E2F4      | 1.0645073 | 6.7334654 | 8.8497976 | 8.37E-17 | 1.03E-15  | 27.418165 |
| EIF3H     | 1.0654127 | 10.475048 | 8.2564535 | 5.14E-15 | 4.86E-14  | 23.368695 |
| TSEN15    | 1.0654354 | 6.2586489 | 10.540279 | 3.02E-22 | 9.53E-21  | 39.775374 |
| MYO9B     | 1.0655149 | 6.0099883 | 9.665537  | 2.27E-19 | 4.27E-18  | 33.242806 |
| ATF6B     | 1.0655605 | 5.6812288 | 8.0078143 | 2.74E-14 | 2.35E-13  | 21.723382 |
| POGK      | 1.0660762 | 6.2907446 | 7.3079653 | 2.57E-12 | 1.65E-11  | 17.270224 |
| PRKD2     | 1.0662076 | 7.2710709 | 10.576614 | 2.28E-22 | 7.39E-21  | 40.05242  |
| CTNNA1    | 1.0663965 | 8.9859483 | 9.4375069 | 1.22E-18 | 2.01E-17  | 31.586713 |
| YDJC      | 1.0669735 | 6.9549874 | 8.5650995 | 6.16E-16 | 6.66E-15  | 25.454165 |
| ZNF335    | 1.0672865 | 5.6202014 | 11.448238 | 2.42E-25 | 1.39E-23  | 46.81748  |
| ATXN2L    | 1.0674165 | 7.4705114 | 7.2413433 | 3.91E-12 | 2.44E-11  | 16.860726 |
| TAF10     | 1.0677096 | 7.9031932 | 13.39898  | 2.79E-32 | 6.62E-30  | 62.6149   |
| ARMC1     | 1.0679331 | 7.0658308 | 9.3666673 | 2.04E-18 | 3.24E-17  | 31.076493 |
| LINC00944 | 1.0682039 | 2.7540326 | 4.8629379 | 1.89E-06 | 5.59E-06  | 4.14196   |
| ACTL6A    | 1.0683829 | 7.5985665 | 7.0536713 | 1.25E-11 | 7.27E-11  | 15.721304 |
| COLGALT1  | 1.0689453 | 7.1597811 | 9.142985  | 1.03E-17 | 1.46E-16  | 29.479141 |
| FAAP24    | 1.0689789 | 2.5005181 | 9.6095372 | 3.43E-19 | 6.21E-18  | 32.834193 |
| NF2       | 1.0690243 | 5.0651747 | 9.682933  | 1.99E-19 | 3.80E-18  | 33.369989 |
| DUS1L     | 1.0692829 | 9.2797621 | 11.947242 | 4.38E-27 | 3.44E-25  | 50.782535 |
| HOXA10    | 1.0694145 | 2.1336635 | 4.8000461 | 2.53E-06 | 7.36E-06  | 3.8611387 |
| GOLGA3    | 1.0694491 | 6.3466382 | 10.101695 | 8.63E-21 | 2.11E-19  | 36.466011 |
| RGL3      | 1.0695333 | 6.9946794 | 5.7261489 | 2.54E-08 | 9.57E-08  | 8.3017493 |
| CBX2      | 1.0697442 | 1.7530137 | 6.9802318 | 1.96E-11 | 1.10E-10  | 15.281192 |
| EIF3B     | 1.069786  | 9.8246074 | 10.712084 | 7.98E-23 | 2.91E-21  | 41.089043 |
| LAMTOR2   | 1.0704757 | 10.361299 | 10.741572 | 6.35E-23 | 2.35E-21  | 41.315446 |
| VBP1      | 1.0705822 | 6.1927136 | 9.5066449 | 7.32E-19 | 1.26E-17  | 32.086644 |
| DAPK3     | 1.0708182 | 6.9054701 | 9.328541  | 2.69E-18 | 4.19E-17  | 30.802745 |
| MRPL55    | 1.0712922 | 8.8311591 | 10.006847 | 1.77E-20 | 4.05E-19  | 35.759112 |
| RNF43     | 1.0714172 | 6.264975  | 4.4921196 | 1.01E-05 | 2.74E-05  | 2.5316482 |
| RPLP2     | 1.0714711 | 13.826029 | 8.5479677 | 6.94E-16 | 7.45E-15  | 25.337196 |
| NDUFB9    | 1.0716933 | 12.195007 | 9.1574232 | 9.31E-18 | 1.33E-16  | 29.581607 |
| MED24     | 1.0717907 | 7.2963475 | 8.8781014 | 6.85E-17 | 8.54E-16  | 27.615461 |
| UQCRB     | 1.0718741 | 9.3030585 | 9.2377159 | 5.21E-18 | 7.71E-17  | 30.153056 |
| SLC44A3   | 1.0725221 | 5.5471712 | 4.5118902 | 9.30E-06 | 2.52E-05  | 2.6147165 |
| COPS5     | 1.0725268 | 9.6681388 | 10.921489 | 1.56E-23 | 6.58E-22  | 42.702591 |
| ACVRL1    | 1.0727452 | 5.5006587 | 8.490729  | 1.03E-15 | 1.08E-14  | 24.94741  |
| PDZK1     | 1.0734083 | 8.6745989 | 5.5626217 | 5.98E-08 | 2.15E-07  | 7.4711577 |
| BROX      | 1.0734219 | 4.8274151 | 9.0038034 | 2.80E-17 | 3.71E-16  | 28.496025 |
| RRP1      | 1.0736042 | 6.7292315 | 10.825735 | 3.29E-23 | 1.29E-21  | 41.963114 |
| ZSCAN2    | 1.0736595 | 4.4378024 | 10.659262 | 1.20E-22 | 4.19E-21  | 40.684156 |
| CLDN7     | 1.0736835 | 7.5501446 | 4.0364457 | 6.93E-05 | 0.0001672 | 0.7062905 |
| TRMT6     | 1.0743624 | 5.1361905 | 9.1902484 | 7.34E-18 | 1.07E-16  | 29.814895 |
| ANKRD29   | 1.0743909 | 4.4815463 | 6.3943923 | 6.32E-10 | 2.91E-09  | 11.891067 |
| POGZ      | 1.0744118 | 6.8887063 | 7.8770655 | 6.53E-14 | 5.28E-13  | 20.871082 |

|         |           |           |           |           |           |           |
|---------|-----------|-----------|-----------|-----------|-----------|-----------|
| STRN4   | 1.0746255 | 7.1291984 | 8.7572113 | 1.61E-16  | 1.89E-15  | 26.77533  |
| DEF8    | 1.0747542 | 6.5680586 | 10.265839 | 2.48E-21  | 6.71E-20  | 37.696898 |
| ROMO1   | 1.0755257 | 10.707004 | 9.8375374 | 6.30E-20  | 1.30E-18  | 34.505407 |
| TRMT61A | 1.07587   | 5.9128926 | 10.744859 | 6.19E-23  | 2.29E-21  | 41.340706 |
| HIGD1B  | 1.0760392 | 3.8465292 | 12.012832 | 2.57E-27  | 2.08E-25  | 51.308113 |
| SEC61G  | 1.0767614 | 9.5578399 | 9.6236162 | 3.09E-19  | 5.66E-18  | 32.936808 |
| UCN     | 1.0769332 | 4.789831  | 7.1065212 | 9.03E-12  | 5.36E-11  | 16.040046 |
| ZMYND19 | 1.0769549 | 5.7469511 | 10.3293   | 1.53E-21  | 4.27E-20  | 38.175273 |
| ANKRD39 | 1.077274  | 6.9237679 | 12.02849  | 2.27E-27  | 1.85E-25  | 51.433726 |
| TSC1    | 1.077726  | 6.2120266 | 8.9245549 | 4.93E-17  | 6.28E-16  | 27.940053 |
| WDR46   | 1.0779652 | 5.9168861 | 11.402787 | 3.48E-25  | 1.92E-23  | 46.459425 |
| CMTM4   | 1.0779899 | 4.5807335 | 6.8130705 | 5.40E-11  | 2.85E-10  | 14.29175  |
| TOPBP1  | 1.0782885 | 5.0255539 | 7.1691001 | 6.13E-12  | 3.72E-11  | 16.419628 |
| EEF1E1  | 1.078331  | 6.4173473 | 7.5429218 | 5.77E-13  | 4.04E-12  | 18.734882 |
| ZNF16   | 1.0790943 | 5.0639866 | 10.179816 | 4.77E-21  | 1.21E-19  | 37.050651 |
| SNX8    | 1.0796012 | 6.9126506 | 8.8232879 | 1.01E-16  | 1.23E-15  | 27.233706 |
| NDUFA1  | 1.0805943 | 11.34036  | 10.3917   | 9.47E-22  | 2.75E-20  | 38.646987 |
| ACSM1   | 1.0812052 | 5.8495774 | 3.1410534 | 0.0018549 | 0.0036121 | -2.363346 |
| SH3GLB2 | 1.0815776 | 6.1433925 | 9.2672884 | 4.20E-18  | 6.35E-17  | 30.364214 |
| ZP3     | 1.0816339 | 3.9714321 | 6.9780047 | 1.99E-11  | 1.12E-10  | 15.267896 |
| BCL6B   | 1.0817573 | 4.4937966 | 7.6075517 | 3.80E-13  | 2.73E-12  | 19.143262 |
| LYSMD1  | 1.0823495 | 5.2792868 | 9.2400098 | 5.12E-18  | 7.60E-17  | 30.169422 |
| THBS3   | 1.0825169 | 6.2258573 | 8.2478436 | 5.45E-15  | 5.14E-14  | 23.311194 |
| PPIL1   | 1.0828316 | 7.979162  | 8.4688598 | 1.20E-15  | 1.24E-14  | 24.798901 |
| BPGM    | 1.0832914 | 6.5876959 | 9.2596192 | 4.45E-18  | 6.67E-17  | 30.309418 |
| CCDC77  | 1.0833334 | 5.9635582 | 9.232181  | 5.42E-18  | 8.00E-17  | 30.113576 |
| MVP     | 1.0834666 | 9.9292291 | 6.6636267 | 1.32E-10  | 6.59E-10  | 13.42195  |
| INCENP  | 1.0840808 | 4.4440668 | 7.4642226 | 9.55E-13  | 6.47E-12  | 18.240777 |
| PARBPB  | 1.0840855 | 2.6426987 | 8.1476134 | 1.07E-14  | 9.70E-14  | 22.644572 |
| PRKCD   | 1.0841324 | 6.5431576 | 6.6243483 | 1.66E-10  | 8.20E-10  | 13.195692 |
| CYC1    | 1.0846706 | 10.034718 | 9.9481448 | 2.75E-20  | 6.04E-19  | 35.323237 |
| YWHAZ   | 1.0849434 | 8.3100544 | 6.9748932 | 2.03E-11  | 1.14E-10  | 15.249326 |
| STX4    | 1.0849665 | 7.8944005 | 12.80865  | 3.79E-30  | 5.34E-28  | 57.756947 |
| MUS81   | 1.0849683 | 7.3846197 | 11.310895 | 7.22E-25  | 3.80E-23  | 45.737206 |
| FHL3    | 1.0850071 | 5.0713881 | 6.8636023 | 3.98E-11  | 2.14E-10  | 14.589028 |
| B3GAT3  | 1.0858692 | 7.0221115 | 10.040274 | 1.37E-20  | 3.20E-19  | 36.00787  |
| PTH2R   | 1.0858968 | 1.9423252 | 3.7109952 | 0.0002469 | 0.0005529 | -0.490346 |
| ZNF740  | 1.0860139 | 3.3437015 | 9.9352091 | 3.03E-20  | 6.60E-19  | 35.227356 |
| MGP     | 1.0865082 | 7.779036  | 3.4786201 | 0.0005802 | 0.001224  | -1.28868  |
| BANF1   | 1.0865868 | 8.7342621 | 13.018249 | 6.67E-31  | 1.16E-28  | 59.475297 |
| MFS3    | 1.0865893 | 7.5987626 | 7.3100501 | 2.54E-12  | 1.63E-11  | 17.28308  |
| ZNF205  | 1.0867365 | 6.8806398 | 10.654861 | 1.24E-22  | 4.32E-21  | 40.65046  |
| MTX1    | 1.0867903 | 7.3366372 | 11.13117  | 3.00E-24  | 1.42E-22  | 44.331292 |
| TAF1D   | 1.0868108 | 7.1532039 | 7.5681814 | 4.90E-13  | 3.46E-12  | 18.894212 |
| GLS     | 1.086935  | 6.0453493 | 5.5157969 | 7.61E-08  | 2.70E-07  | 7.2369015 |
| RPL7    | 1.0871267 | 11.175403 | 7.1450844 | 7.11E-12  | 4.28E-11  | 16.273681 |
| GNPDA1  | 1.087195  | 6.0813253 | 7.7158971 | 1.88E-13  | 1.42E-12  | 19.833079 |
| INPPL1  | 1.0874716 | 7.3682839 | 7.9128299 | 5.16E-14  | 4.24E-13  | 21.103316 |
| CENPT   | 1.0875037 | 5.1851663 | 10.47796  | 4.88E-22  | 1.48E-20  | 39.301209 |
| OGG1    | 1.0877652 | 6.1081737 | 9.6444437 | 2.65E-19  | 4.93E-18  | 33.088751 |
| CDK4    | 1.0879587 | 8.1531299 | 6.7250007 | 9.14E-11  | 4.67E-10  | 13.777455 |

|          |           |           |           |           |           |           |
|----------|-----------|-----------|-----------|-----------|-----------|-----------|
| ZNF57    | 1.0881092 | 4.473313  | 7.1623618 | 6.39E-12  | 3.87E-11  | 16.378644 |
| RRP36    | 1.0883478 | 9.0720078 | 11.443573 | 2.51E-25  | 1.43E-23  | 46.780701 |
| RPL28    | 1.088366  | 9.4465342 | 8.5195641 | 8.45E-16  | 8.94E-15  | 25.143575 |
| DNAJC9   | 1.0891593 | 7.0906744 | 6.9700276 | 2.09E-11  | 1.17E-10  | 15.220299 |
| NTPCR    | 1.089285  | 7.0525014 | 10.313258 | 1.73E-21  | 4.79E-20  | 38.054216 |
| RASSF1   | 1.0893277 | 6.7563048 | 10.356155 | 1.24E-21  | 3.53E-20  | 38.378126 |
| TNRC18   | 1.0894167 | 6.6702538 | 7.7304016 | 1.71E-13  | 1.30E-12  | 19.925917 |
| PARP2    | 1.0894206 | 6.9965334 | 9.9347841 | 3.04E-20  | 6.62E-19  | 35.224207 |
| ADCK2    | 1.0895561 | 6.4979959 | 9.054821  | 1.95E-17  | 2.62E-16  | 28.85541  |
| IFI27L1  | 1.089619  | 6.8947991 | 9.9881803 | 2.03E-20  | 4.62E-19  | 35.620371 |
| NDRG1    | 1.0896308 | 7.7843569 | 4.9236822 | 1.42E-06  | 4.27E-06  | 4.4161402 |
| PIK3C2B  | 1.0897832 | 6.6755749 | 7.3322446 | 2.21E-12  | 1.43E-11  | 17.420104 |
| DLGAP4   | 1.0905366 | 5.9513391 | 8.9890719 | 3.11E-17  | 4.11E-16  | 28.392465 |
| NDUFS6   | 1.0906199 | 10.759466 | 9.9868548 | 2.05E-20  | 4.66E-19  | 35.610525 |
| ARHGEF2  | 1.0907257 | 5.1068435 | 6.3416866 | 8.55E-10  | 3.89E-09  | 11.59693  |
| PLEKHG2  | 1.0908848 | 5.1139078 | 7.803024  | 1.06E-13  | 8.32E-13  | 20.392473 |
| TRNP1    | 1.0908872 | 5.9021423 | 3.3299404 | 0.0009794 | 0.0019973 | -1.774537 |
| DESI2    | 1.0910153 | 4.6710707 | 8.3084926 | 3.61E-15  | 3.49E-14  | 23.717026 |
| FBLN1    | 1.0910418 | 5.1189219 | 3.6414848 | 0.0003202 | 0.0007059 | -0.734097 |
| CFL1     | 1.0913226 | 10.112685 | 11.319355 | 6.75E-25  | 3.60E-23  | 45.803606 |
| PFDN4    | 1.091593  | 6.3978993 | 9.0848198 | 1.57E-17  | 2.15E-16  | 29.067263 |
| RPL32P3  | 1.0921573 | 4.3026861 | 8.0591948 | 1.95E-14  | 1.70E-13  | 22.060771 |
| TMED9    | 1.0925292 | 9.7819621 | 11.435536 | 2.68E-25  | 1.52E-23  | 46.717361 |
| PFDN2    | 1.0925732 | 8.4796913 | 10.440788 | 6.50E-22  | 1.94E-20  | 39.018981 |
| CCDC24   | 1.0926807 | 5.3113076 | 6.8364801 | 4.69E-11  | 2.49E-10  | 14.429271 |
| TUBB4A   | 1.0927615 | 3.7635259 | 3.0832686 | 0.0022418 | 0.0043083 | -2.537063 |
| HAGHL    | 1.0928131 | 5.0618382 | 5.7800964 | 1.90E-08  | 7.32E-08  | 8.5799794 |
| MZT1     | 1.0930737 | 5.2298557 | 8.5421839 | 7.22E-16  | 7.74E-15  | 25.297737 |
| HMGN1    | 1.093121  | 7.9327509 | 8.2268502 | 6.28E-15  | 5.86E-14  | 23.171147 |
| TPCN1    | 1.093174  | 6.4620577 | 7.5934518 | 4.16E-13  | 2.98E-12  | 19.053969 |
| MSX1     | 1.0932361 | 3.9103856 | 7.0723131 | 1.12E-11  | 6.53E-11  | 15.833542 |
| KATNB1   | 1.0932909 | 5.8103361 | 9.3410914 | 2.46E-18  | 3.86E-17  | 30.89279  |
| CDK5RAP2 | 1.0934842 | 7.2565082 | 9.4841511 | 8.64E-19  | 1.47E-17  | 31.923781 |
| SRC      | 1.0935752 | 5.3278177 | 4.5853132 | 6.71E-06  | 1.86E-05  | 2.925982  |
| CCDC124  | 1.0936038 | 8.5105358 | 11.64621  | 4.96E-26  | 3.19E-24  | 48.383231 |
| DNAJC6   | 1.0936179 | 1.7048485 | 6.8490164 | 4.35E-11  | 2.32E-10  | 14.503056 |
| TSACC    | 1.093618  | 4.7714472 | 8.5890693 | 5.22E-16  | 5.68E-15  | 25.618058 |
| SLC1A4   | 1.0936294 | 5.2773294 | 6.9934131 | 1.81E-11  | 1.02E-10  | 15.359944 |
| ITPA     | 1.0936439 | 8.0979385 | 9.6756108 | 2.10E-19  | 3.99E-18  | 33.316442 |
| GPR35    | 1.0936583 | 3.2511476 | 4.2768941 | 2.57E-05  | 6.56E-05  | 1.6480349 |
| FIBP     | 1.0938046 | 7.9260847 | 13.0981   | 3.43E-31  | 6.45E-29  | 60.131883 |
| SCGN     | 1.0945093 | 6.3031664 | 3.1128119 | 0.0020355 | 0.0039346 | -2.448625 |
| TRIM47   | 1.0946941 | 6.8784002 | 5.1263255 | 5.36E-07  | 1.71E-06  | 5.351534  |
| CLTA     | 1.094787  | 10.400615 | 10.716778 | 7.70E-23  | 2.82E-21  | 41.125067 |
| SOX4     | 1.0951215 | 6.2369538 | 3.9465012 | 9.93E-05  | 0.0002348 | 0.366523  |
| NUAK1    | 1.095602  | 6.5520787 | 7.483701  | 8.43E-13  | 5.76E-12  | 18.362743 |
| ABCC5    | 1.0958905 | 4.3262798 | 9.7628181 | 1.10E-19  | 2.19E-18  | 33.955528 |
| MTERF3   | 1.0962756 | 7.0205259 | 9.0770889 | 1.66E-17  | 2.26E-16  | 29.01263  |
| AP1S1    | 1.0963206 | 6.8624027 | 11.804712 | 1.39E-26  | 9.73E-25  | 49.643842 |
| ZYX      | 1.0967036 | 7.581213  | 7.0100262 | 1.64E-11  | 9.31E-11  | 15.45935  |
| SNHG17   | 1.096909  | 5.8904826 | 7.2678576 | 3.31E-12  | 2.09E-11  | 17.023387 |

|            |           |           |           |           |          |           |
|------------|-----------|-----------|-----------|-----------|----------|-----------|
| SNF8       | 1.097237  | 6.9431504 | 12.207    | 5.31E-28  | 4.91E-26 | 52.869589 |
| SLC29A2    | 1.0973435 | 4.7410607 | 6.8050162 | 5.67E-11  | 2.98E-10 | 14.244514 |
| HEIH       | 1.0974466 | 8.5298232 | 9.9168578 | 3.48E-20  | 7.54E-19 | 35.09144  |
| POLR1A     | 1.097545  | 4.4368539 | 9.8278478 | 6.77E-20  | 1.39E-18 | 34.433979 |
| ATOX1      | 1.0977921 | 10.683262 | 8.311214  | 3.54E-15  | 3.43E-14 | 23.735279 |
| CLTCL1     | 1.0978312 | 5.2541236 | 7.0221079 | 1.52E-11  | 8.72E-11 | 15.531748 |
| MAPKAPK2   | 1.0979361 | 7.5777629 | 9.1388742 | 1.06E-17  | 1.50E-16 | 29.449984 |
| SLC2A5     | 1.0983561 | 3.5944194 | 4.3911531 | 1.57E-05  | 4.15E-05 | 2.1123941 |
| CD2BP2     | 1.0983647 | 6.5532628 | 10.506422 | 3.92E-22  | 1.20E-20 | 39.517615 |
| HSPA5      | 1.0987234 | 10.163041 | 8.9654901 | 3.68E-17  | 4.80E-16 | 28.226888 |
| DEDD       | 1.0997319 | 6.5042103 | 11.867002 | 8.38E-27  | 6.05E-25 | 50.140901 |
| KIF22      | 1.1001811 | 6.7922381 | 9.2771164 | 3.92E-18  | 5.95E-17 | 30.434471 |
| CHD1L      | 1.1003567 | 7.6046997 | 8.5745829 | 5.77E-16  | 6.25E-15 | 25.518975 |
| LGALS3     | 1.1004953 | 8.6059654 | 3.9202164 | 0.0001101 | 0.000259 | 0.2685302 |
| ASPHD1     | 1.100864  | 4.6442236 | 4.1756982 | 3.92E-05  | 9.79E-05 | 1.2457946 |
| SLC26A11   | 1.100995  | 7.424528  | 9.0070877 | 2.74E-17  | 3.63E-16 | 28.519126 |
| BMP4       | 1.1011453 | 4.6810722 | 4.2927785 | 2.40E-05  | 6.15E-05 | 1.7119458 |
| FAM20B     | 1.1018917 | 5.9278515 | 9.3620824 | 2.11E-18  | 3.34E-17 | 31.043542 |
| ZNF341     | 1.1020047 | 3.9569331 | 9.4063959 | 1.53E-18  | 2.48E-17 | 31.362384 |
| TMEM65     | 1.1023173 | 4.2613584 | 6.1911315 | 2.00E-09  | 8.73E-09 | 10.766936 |
| TMEM120B   | 1.1026316 | 5.0262316 | 12.171747 | 7.07E-28  | 6.41E-26 | 52.585474 |
| HEATR1     | 1.1027644 | 4.328802  | 7.0274863 | 1.47E-11  | 8.44E-11 | 15.564006 |
| ELFN2      | 1.1033732 | 3.807633  | 5.7001295 | 2.91E-08  | 1.09E-07 | 8.1683002 |
| FBXO32     | 1.103862  | 3.8066195 | 6.0028744 | 5.70E-09  | 2.34E-08 | 9.7507365 |
| CH17-340M2 | 1.1039496 | 6.2259679 | 8.3198287 | 3.34E-15  | 3.24E-14 | 23.793085 |
| COPE       | 1.1041663 | 8.5881856 | 11.277385 | 9.42E-25  | 4.87E-23 | 45.4744   |
| DUXAP8     | 1.1044515 | 2.9712482 | 6.4332832 | 5.05E-10  | 2.35E-09 | 12.109284 |
| ZNF74      | 1.1046268 | 5.3708953 | 9.1555748 | 9.43E-18  | 1.35E-16 | 29.568485 |
| NEDD4L     | 1.1047196 | 6.1272382 | 7.7878329 | 1.18E-13  | 9.13E-13 | 20.294643 |
| SIRT6      | 1.1048829 | 6.1571661 | 10.981434 | 9.74E-24  | 4.25E-22 | 43.166912 |
| TERT       | 1.105071  | 4.1519129 | 4.338068  | 1.98E-05  | 5.14E-05 | 1.8953129 |
| UPF3B      | 1.1055698 | 5.6322206 | 8.7173294 | 2.13E-16  | 2.45E-15 | 26.49964  |
| RHEB       | 1.1057969 | 8.8347176 | 9.9560862 | 2.59E-20  | 5.73E-19 | 35.382129 |
| HDAC5      | 1.1062424 | 7.0968851 | 9.2968814 | 3.39E-18  | 5.21E-17 | 30.575886 |
| ARHGEF37   | 1.1067594 | 5.2792121 | 6.1023719 | 3.29E-09  | 1.39E-08 | 10.284791 |
| UTP14A     | 1.1068867 | 5.810695  | 9.9689755 | 2.35E-20  | 5.28E-19 | 35.477764 |
| RPTOR      | 1.1077391 | 6.8982626 | 9.704357  | 1.70E-19  | 3.29E-18 | 33.526781 |
| UBE2M      | 1.1082425 | 8.2044689 | 11.21754  | 1.51E-24  | 7.54E-23 | 45.005816 |
| FOXD2      | 1.1087492 | 4.219243  | 7.327049  | 2.28E-12  | 1.47E-11 | 17.388002 |
| GMPPB      | 1.108869  | 6.6324089 | 9.9633368 | 2.45E-20  | 5.48E-19 | 35.435919 |
| GNA12      | 1.1090154 | 5.6158606 | 7.5886529 | 4.30E-13  | 3.06E-12 | 19.023603 |
| THEM6      | 1.1090821 | 8.2345553 | 7.7408153 | 1.60E-13  | 1.22E-12 | 19.992643 |
| ARPC1A     | 1.1092201 | 9.5713383 | 12.097356 | 1.30E-27  | 1.11E-25 | 51.986831 |
| TPM1       | 1.109498  | 7.8631421 | 6.3391952 | 8.67E-10  | 3.94E-09 | 11.583072 |
| GDI1       | 1.1095796 | 8.1559122 | 10.473895 | 5.04E-22  | 1.52E-20 | 39.270327 |
| BCAS4      | 1.1100915 | 3.3422915 | 6.892548  | 3.34E-11  | 1.82E-10 | 14.760031 |
| TBCB       | 1.1103028 | 8.4322973 | 9.6203167 | 3.17E-19  | 5.77E-18 | 32.912752 |
| PRR11      | 1.1116521 | 4.6107437 | 7.3033585 | 2.65E-12  | 1.69E-11 | 17.241825 |
| SNRPD1     | 1.112704  | 7.7032506 | 9.6932623 | 1.85E-19  | 3.55E-18 | 33.445561 |
| STT3A      | 1.1127904 | 8.6113698 | 9.6316003 | 2.91E-19  | 5.37E-18 | 32.995035 |
| CDC37      | 1.11314   | 9.2770245 | 13.294421 | 6.68E-32  | 1.42E-29 | 61.750463 |

|          |           |           |           |           |           |           |
|----------|-----------|-----------|-----------|-----------|-----------|-----------|
| RPLP1    | 1.1133399 | 14.008624 | 9.7157548 | 1.56E-19  | 3.04E-18  | 33.610268 |
| HNRNPA1  | 1.1136198 | 9.787845  | 8.6237354 | 4.10E-16  | 4.54E-15  | 25.855569 |
| LRRC20   | 1.1137596 | 6.8584615 | 7.2812833 | 3.04E-12  | 1.93E-11  | 17.105909 |
| INTS1    | 1.1137618 | 4.7520619 | 10.06683  | 1.12E-20  | 2.69E-19  | 36.205786 |
| NPC1     | 1.1140312 | 5.9248837 | 7.9313331 | 4.56E-14  | 3.79E-13  | 21.223733 |
| CCDC86   | 1.1140538 | 6.5426245 | 8.4303327 | 1.56E-15  | 1.58E-14  | 24.537837 |
| RABL6    | 1.1143029 | 5.5746838 | 8.519243  | 8.47E-16  | 8.96E-15  | 25.141388 |
| TPM3     | 1.1150026 | 7.3050115 | 9.2757559 | 3.95E-18  | 5.99E-17  | 30.424742 |
| C9orf16  | 1.1150638 | 7.3109857 | 8.6161459 | 4.32E-16  | 4.76E-15  | 25.803522 |
| SLC35F6  | 1.1152613 | 6.8336147 | 8.8240916 | 1.00E-16  | 1.22E-15  | 27.239294 |
| TPR      | 1.1154474 | 7.6200707 | 7.3884729 | 1.55E-12  | 1.02E-11  | 17.768521 |
| CRTC2    | 1.1155915 | 7.9169526 | 10.602904 | 1.86E-22  | 6.19E-21  | 40.25314  |
| PCSK9    | 1.1156495 | 7.7483039 | 4.8378919 | 2.12E-06  | 6.24E-06  | 4.0297528 |
| AGBL5    | 1.11594   | 5.7132449 | 8.2810057 | 4.35E-15  | 4.16E-14  | 23.532869 |
| RPS6KL1  | 1.1160746 | 2.8796259 | 8.1506195 | 1.05E-14  | 9.51E-14  | 22.66449  |
| CEP250   | 1.1164177 | 4.4321276 | 10.391065 | 9.52E-22  | 2.76E-20  | 38.642181 |
| BRD8     | 1.1166245 | 7.5971528 | 9.3115866 | 3.05E-18  | 4.69E-17  | 30.681205 |
| CDC25A   | 1.1168296 | 3.1595732 | 6.7966545 | 5.96E-11  | 3.12E-10  | 14.195517 |
| NIPAL2   | 1.1170641 | 5.2490245 | 6.1352554 | 2.74E-09  | 1.17E-08  | 10.462789 |
| JOSD2    | 1.1171092 | 7.0599541 | 8.7311427 | 1.93E-16  | 2.24E-15  | 26.595044 |
| PGF      | 1.1174611 | 5.2182181 | 5.9014584 | 9.91E-09  | 3.94E-08  | 9.2134468 |
| MSI1     | 1.1176126 | 3.6853061 | 4.6081953 | 6.06E-06  | 1.68E-05  | 3.0238768 |
| SMPX     | 1.1181925 | 3.5701267 | 4.9451867 | 1.28E-06  | 3.88E-06  | 4.5138956 |
| FADS3    | 1.1182739 | 6.4884816 | 8.2003456 | 7.52E-15  | 6.93E-14  | 22.994653 |
| DGKZ     | 1.1182801 | 5.7556701 | 10.146397 | 6.15E-21  | 1.54E-19  | 36.800289 |
| LOXL4    | 1.1183425 | 5.8234493 | 3.2903228 | 0.0011225 | 0.0022698 | -1.900684 |
| TMEM161B | 1.1184042 | 5.3344128 | 8.4467545 | 1.40E-15  | 1.43E-14  | 24.649024 |
| SOGA1    | 1.1186299 | 3.1067939 | 7.5668059 | 4.95E-13  | 3.49E-12  | 18.885526 |
| ZBTB45   | 1.1188607 | 7.0185935 | 10.306124 | 1.82E-21  | 5.03E-20  | 38.000407 |
| PPM1G    | 1.119076  | 8.4877891 | 11.1367   | 2.87E-24  | 1.37E-22  | 44.374421 |
| CTTN     | 1.1190869 | 6.2009972 | 9.2853722 | 3.69E-18  | 5.62E-17  | 30.493519 |
| UBE20    | 1.1193753 | 6.0296813 | 9.9571893 | 2.57E-20  | 5.70E-19  | 35.390311 |
| BCAT2    | 1.1195151 | 6.503003  | 7.2607259 | 3.46E-12  | 2.17E-11  | 16.979595 |
| NPM3     | 1.1196221 | 7.2814976 | 5.5839421 | 5.35E-08  | 1.94E-07  | 7.5783503 |
| C7orf50  | 1.119773  | 5.8971842 | 9.7757047 | 9.99E-20  | 2.00E-18  | 34.050213 |
| KLHL21   | 1.1198093 | 6.7443606 | 6.4326629 | 5.07E-10  | 2.35E-09  | 12.105796 |
| AKIP1    | 1.1198443 | 6.8289814 | 12.097623 | 1.29E-27  | 1.11E-25  | 51.988978 |
| CENPQ    | 1.1200595 | 5.3770106 | 7.4705691 | 9.17E-13  | 6.22E-12  | 18.280493 |
| MRAS     | 1.1200794 | 5.4304701 | 6.350319  | 8.14E-10  | 3.71E-09  | 11.644979 |
| POLR2G   | 1.1200995 | 9.5182934 | 12.365519 | 1.45E-28  | 1.49E-26  | 54.150344 |
| EZH1     | 1.1201389 | 6.0125926 | 9.5563415 | 5.08E-19  | 8.91E-18  | 32.447183 |
| RCN2     | 1.1203253 | 6.9596461 | 8.2761906 | 4.49E-15  | 4.29E-14  | 23.500648 |
| MAPK8IP3 | 1.1205308 | 3.2665925 | 7.0964785 | 9.61E-12  | 5.68E-11  | 15.979348 |
| FGFR4    | 1.1213817 | 7.8050828 | 5.4765314 | 9.32E-08  | 3.28E-07  | 7.0417019 |
| CS       | 1.1219267 | 6.3515574 | 7.9074813 | 5.34E-14  | 4.39E-13  | 21.068542 |
| MCRIP1   | 1.122121  | 9.2749418 | 7.8041068 | 1.06E-13  | 8.27E-13  | 20.399451 |
| TEL02    | 1.1223158 | 6.7400679 | 10.95483  | 1.20E-23  | 5.18E-22  | 42.960719 |
| BOLA2B   | 1.1227183 | 6.8785954 | 9.0393539 | 2.17E-17  | 2.91E-16  | 28.746334 |
| SLC22A31 | 1.1233344 | 2.8652903 | 3.0988887 | 0.0021304 | 0.0041044 | -2.490403 |
| DVL3     | 1.1237258 | 6.1296492 | 8.3841183 | 2.15E-15  | 2.14E-14  | 24.225639 |
| NUDCD1   | 1.1239729 | 5.0566039 | 8.7110965 | 2.22E-16  | 2.55E-15  | 26.456622 |

|            |           |           |           |           |           |           |
|------------|-----------|-----------|-----------|-----------|-----------|-----------|
| GJA5       | 1.1240603 | 3.0078697 | 6.812882  | 5.41E-11  | 2.85E-10  | 14.290644 |
| LCMT1      | 1.1243243 | 7.3272724 | 10.970956 | 1.06E-23  | 4.59E-22  | 43.085678 |
| VPS33A     | 1.1248923 | 5.8872557 | 12.448427 | 7.36E-29  | 8.10E-27  | 54.822246 |
| LRRC1      | 1.1250043 | 4.3783483 | 6.8310087 | 4.85E-11  | 2.57E-10  | 14.397098 |
| ZKSCAN3    | 1.1254213 | 4.1153091 | 8.6621889 | 3.13E-16  | 3.52E-15  | 26.119692 |
| PCGF1      | 1.1256362 | 6.6182217 | 14.287364 | 1.57E-35  | 6.03E-33  | 70.017849 |
| TMEM201    | 1.1257256 | 6.0139033 | 9.2436745 | 4.99E-18  | 7.40E-17  | 30.195572 |
| PWWP2B     | 1.1257908 | 6.40024   | 5.8885293 | 1.06E-08  | 4.21E-08  | 9.1454673 |
| MRPL13     | 1.125858  | 9.4747485 | 9.6261214 | 3.03E-19  | 5.58E-18  | 32.955075 |
| AIF1L      | 1.1261904 | 5.3829737 | 5.4123744 | 1.29E-07  | 4.48E-07  | 6.7252062 |
| ST6GALNAC4 | 1.1262003 | 5.2896101 | 6.1555608 | 2.45E-09  | 1.05E-08  | 10.573071 |
| GGA3       | 1.1262839 | 6.4048058 | 9.5790745 | 4.30E-19  | 7.61E-18  | 32.612433 |
| RSRP1      | 1.1268232 | 6.4964051 | 7.924506  | 4.77E-14  | 3.96E-13  | 21.179282 |
| SLC6A9     | 1.1268568 | 2.2155172 | 5.639374  | 4.01E-08  | 1.48E-07  | 7.8585924 |
| MAF1       | 1.1270801 | 7.6471166 | 9.0703387 | 1.74E-17  | 2.37E-16  | 28.964948 |
| SLC4A2     | 1.1271175 | 6.6307019 | 6.9679839 | 2.11E-11  | 1.18E-10  | 15.208111 |
| SLC12A9    | 1.1272755 | 6.9303126 | 9.3453138 | 2.38E-18  | 3.75E-17  | 30.9231   |
| METTL18    | 1.1273953 | 5.9647856 | 10.621983 | 1.61E-22  | 5.46E-21  | 40.398941 |
| NME3       | 1.1274894 | 9.4584061 | 9.689571  | 1.90E-19  | 3.64E-18  | 33.41855  |
| ACTA2      | 1.1275323 | 9.0099206 | 5.6193033 | 4.45E-08  | 1.63E-07  | 7.7568652 |
| SOX9       | 1.1278696 | 5.3330571 | 3.575555  | 0.0004084 | 0.0008848 | -0.961401 |
| WDR4       | 1.1280338 | 5.2548511 | 10.005096 | 1.79E-20  | 4.10E-19  | 35.746094 |
| RPUSD1     | 1.1285395 | 7.0615776 | 10.569466 | 2.41E-22  | 7.77E-21  | 39.997885 |
| ARFRP1     | 1.1286884 | 6.3149818 | 11.774579 | 1.77E-26  | 1.20E-24  | 49.403724 |
| WDR83      | 1.1290732 | 6.1346938 | 11.599519 | 7.22E-26  | 4.55E-24  | 48.013058 |
| LTBP2      | 1.1292857 | 4.6290538 | 4.6280413 | 5.54E-06  | 1.55E-05  | 3.1091238 |
| RAD54L     | 1.1296598 | 3.872196  | 6.7784318 | 6.65E-11  | 3.46E-10  | 14.088891 |
| ZNF83      | 1.1299247 | 4.7584067 | 4.2565407 | 2.80E-05  | 7.12E-05  | 1.5664488 |
| RBM42      | 1.1299903 | 8.7651139 | 12.356624 | 1.56E-28  | 1.58E-26  | 54.078335 |
| CSE1L      | 1.1309364 | 8.414406  | 9.4193747 | 1.39E-18  | 2.27E-17  | 31.455921 |
| BCL2L12    | 1.1310015 | 7.6024839 | 9.6859916 | 1.95E-19  | 3.72E-18  | 33.392362 |
| NCAPG2     | 1.1310278 | 4.7187568 | 7.3469644 | 2.01E-12  | 1.31E-11  | 17.511138 |
| KCTD7      | 1.1312569 | 3.2830672 | 8.9891532 | 3.11E-17  | 4.11E-16  | 28.393036 |
| CCDC93     | 1.1313981 | 4.5569243 | 9.0425424 | 2.12E-17  | 2.85E-16  | 28.768811 |
| ZNF7       | 1.1314171 | 6.2510329 | 11.073824 | 4.71E-24  | 2.17E-22  | 43.884601 |
| RRP12      | 1.1316624 | 5.737394  | 8.497864  | 9.82E-16  | 1.03E-14  | 24.995912 |
| RPL17      | 1.1318167 | 9.7967171 | 9.0842721 | 1.57E-17  | 2.16E-16  | 29.063392 |
| HSPA4      | 1.1319741 | 8.5459409 | 11.764459 | 1.92E-26  | 1.30E-24  | 49.323129 |
| HSPH1      | 1.1321391 | 7.9177763 | 7.480421  | 8.61E-13  | 5.87E-12  | 18.34219  |
| PNMA1      | 1.1321391 | 6.7458848 | 6.1739844 | 2.21E-09  | 9.55E-09  | 10.673375 |
| FTSJ3      | 1.1321654 | 7.7392992 | 11.106888 | 3.63E-24  | 1.70E-22  | 44.142035 |
| GLUL       | 1.1321827 | 9.9845209 | 3.2160781 | 0.0014444 | 0.002866  | -2.133307 |
| TMC01      | 1.1321975 | 8.0192824 | 11.777592 | 1.72E-26  | 1.17E-24  | 49.427719 |
| RPS27      | 1.1324564 | 13.920303 | 8.5694155 | 5.98E-16  | 6.47E-15  | 25.483656 |
| SPHK1      | 1.1336299 | 5.4612521 | 3.4103059 | 0.0007397 | 0.0015356 | -1.514352 |
| PHLDA3     | 1.1336626 | 6.2829171 | 4.1706052 | 4.00E-05  | 9.98E-05  | 1.2257759 |
| TBC1D7     | 1.1339136 | 6.858958  | 11.043335 | 5.99E-24  | 2.68E-22  | 43.647492 |
| CD320      | 1.1349811 | 7.8102593 | 9.3573011 | 2.19E-18  | 3.46E-17  | 31.009188 |
| ZNF696     | 1.1351291 | 5.2925772 | 10.399839 | 8.90E-22  | 2.60E-20  | 38.708611 |
| OGT        | 1.1356462 | 6.7189246 | 7.8665785 | 7.00E-14  | 5.62E-13  | 20.803115 |
| FRZB       | 1.1356576 | 5.6072182 | 5.33024   | 1.96E-07  | 6.64E-07  | 6.3244841 |

|          |           |           |           |           |           |           |
|----------|-----------|-----------|-----------|-----------|-----------|-----------|
| PPP1R37  | 1.1357485 | 5.7218346 | 8.3020273 | 3.77E-15  | 3.64E-14  | 23.673676 |
| TJAP1    | 1.1360711 | 6.6759554 | 9.6244268 | 3.07E-19  | 5.64E-18  | 32.942718 |
| CD151    | 1.1365242 | 8.820434  | 7.6395005 | 3.09E-13  | 2.25E-12  | 19.345999 |
| ATP13A1  | 1.1372937 | 7.2466756 | 11.092408 | 4.07E-24  | 1.88E-22  | 44.029256 |
| GM2A     | 1.1374262 | 6.088498  | 9.677475  | 2.07E-19  | 3.94E-18  | 33.330072 |
| PPP6R1   | 1.1377531 | 6.6269237 | 8.0802227 | 1.69E-14  | 1.49E-13  | 22.199246 |
| PDXK     | 1.1380681 | 6.3629463 | 9.7012436 | 1.74E-19  | 3.36E-18  | 33.503984 |
| ANKRD13D | 1.1382439 | 5.039475  | 7.9024536 | 5.52E-14  | 4.53E-13  | 21.035868 |
| HAGLR    | 1.1383077 | 3.0764574 | 4.7098032 | 3.83E-06  | 1.09E-05  | 3.4636531 |
| ALKBH2   | 1.1383771 | 7.4058438 | 9.3288969 | 2.69E-18  | 4.19E-17  | 30.805297 |
| ADCK5    | 1.1384208 | 6.3300346 | 10.306658 | 1.82E-21  | 5.02E-20  | 38.00444  |
| MAGEA12  | 1.1385166 | 3.3193547 | 3.283976  | 0.0011472 | 0.0023165 | -1.920763 |
| TCF19    | 1.1385774 | 2.9904954 | 8.1272892 | 1.23E-14  | 1.10E-13  | 22.510021 |
| GIGYF1   | 1.1386541 | 5.8756697 | 9.6336458 | 2.87E-19  | 5.30E-18  | 33.009956 |
| MCM10    | 1.138841  | 2.9861981 | 7.0491098 | 1.29E-11  | 7.46E-11  | 15.693872 |
| ALKBH6   | 1.1389525 | 4.7573442 | 10.585565 | 2.13E-22  | 6.97E-21  | 40.120733 |
| SMYD5    | 1.1394521 | 6.0479678 | 9.3826494 | 1.82E-18  | 2.92E-17  | 31.191424 |
| CLASRP   | 1.1400741 | 7.4130635 | 10.089355 | 9.48E-21  | 2.29E-19  | 36.373857 |
| DDX39B   | 1.1408297 | 6.1292011 | 6.7523498 | 7.77E-11  | 4.01E-10  | 13.936641 |
| CLGN     | 1.1411033 | 4.9116326 | 3.7221819 | 0.0002366 | 0.0005317 | -0.450725 |
| DPH7     | 1.1412441 | 5.9731509 | 10.545947 | 2.89E-22  | 9.17E-21  | 39.818562 |
| CDPF1    | 1.1415691 | 6.5599007 | 10.246584 | 2.87E-21  | 7.65E-20  | 37.552017 |
| HAUS1    | 1.1418902 | 6.9075535 | 8.8925051 | 6.19E-17  | 7.77E-16  | 27.716002 |
| PPIA     | 1.1418919 | 10.178234 | 12.191667 | 6.01E-28  | 5.51E-26  | 52.745981 |
| CPNE1    | 1.1424088 | 7.523235  | 8.0087158 | 2.73E-14  | 2.34E-13  | 21.72929  |
| MSH2     | 1.1426149 | 5.5322991 | 9.445493  | 1.15E-18  | 1.91E-17  | 31.644361 |
| ZNF282   | 1.1428695 | 5.311804  | 10.605578 | 1.82E-22  | 6.08E-21  | 40.273563 |
| STX6     | 1.1430933 | 5.1656554 | 9.6559863 | 2.43E-19  | 4.58E-18  | 33.173032 |
| RPS19    | 1.1432293 | 11.676046 | 8.030459  | 2.36E-14  | 2.04E-13  | 21.871909 |
| ERICH5   | 1.1432421 | 7.7121834 | 2.8629451 | 0.0044989 | 0.0082269 | -3.171577 |
| DHX57    | 1.1432835 | 3.781418  | 11.08797  | 4.21E-24  | 1.94E-22  | 43.994704 |
| ZNF563   | 1.1433328 | 5.0389996 | 9.0994325 | 1.41E-17  | 1.95E-16  | 29.1706   |
| VAT1     | 1.1433393 | 7.9444462 | 6.8796935 | 3.61E-11  | 1.95E-10  | 14.684027 |
| SUB1     | 1.1437194 | 8.9515664 | 10.067998 | 1.11E-20  | 2.67E-19  | 36.2145   |
| PTK2     | 1.1440339 | 6.2203838 | 8.4576462 | 1.30E-15  | 1.33E-14  | 24.722841 |
| EXOSC5   | 1.1442221 | 6.9236018 | 10.569807 | 2.40E-22  | 7.76E-21  | 40.000484 |
| REEP4    | 1.1443433 | 6.0667846 | 7.8112085 | 1.01E-13  | 7.92E-13  | 20.445234 |
| MIIP     | 1.1444259 | 6.408396  | 10.060895 | 1.18E-20  | 2.81E-19  | 36.16153  |
| MFSD5    | 1.1446378 | 7.3319453 | 11.72733  | 2.59E-26  | 1.72E-24  | 49.027641 |
| PXN-AS1  | 1.1451564 | 6.4020248 | 10.29875  | 1.93E-21  | 5.30E-20  | 37.944813 |
| SMARCD1  | 1.1451897 | 6.0236971 | 8.9598505 | 3.83E-17  | 4.98E-16  | 28.187327 |
| PMVK     | 1.1455016 | 9.7137374 | 11.229763 | 1.37E-24  | 6.91E-23  | 45.101442 |
| OSBPL3   | 1.1459735 | 3.6242895 | 7.6849276 | 2.30E-13  | 1.71E-12  | 19.63524  |
| DPM2     | 1.1460226 | 7.6419548 | 10.224788 | 3.39E-21  | 8.82E-20  | 37.388178 |
| CUTA     | 1.1461558 | 10.67245  | 11.223242 | 1.45E-24  | 7.25E-23  | 45.050424 |
| USP22    | 1.146317  | 6.1055727 | 7.5635938 | 5.05E-13  | 3.56E-12  | 18.865248 |
| CHTOP    | 1.1464531 | 7.996948  | 11.276782 | 9.46E-25  | 4.88E-23  | 45.469671 |
| PMF1     | 1.14698   | 8.3681388 | 10.531446 | 3.23E-22  | 1.01E-20  | 39.708095 |
| VSIG10L  | 1.1470158 | 6.5072211 | 4.9124491 | 1.50E-06  | 4.49E-06  | 4.3652201 |
| PLEC     | 1.1471114 | 5.481439  | 8.0325441 | 2.33E-14  | 2.02E-13  | 21.885598 |
| VRK1     | 1.147222  | 5.5244875 | 9.1911273 | 7.30E-18  | 1.06E-16  | 29.821147 |



|            |           |           |           |           |           |           |
|------------|-----------|-----------|-----------|-----------|-----------|-----------|
| MRPS12     | 1.1481395 | 8.463722  | 10.419482 | 7.65E-22  | 2.26E-20  | 38.857423 |
| TATDN1     | 1.1482132 | 6.5217763 | 9.9791553 | 2.18E-20  | 4.92E-19  | 35.553339 |
| TMEM147-AS | 1.1482163 | 3.176959  | 7.8927544 | 5.89E-14  | 4.79E-13  | 20.972873 |
| E4F1       | 1.1485571 | 6.7159037 | 10.335673 | 1.45E-21  | 4.08E-20  | 38.223393 |
| RNPEPL1    | 1.1488114 | 7.9573686 | 11.420907 | 3.01E-25  | 1.68E-23  | 46.602104 |
| TMEM94     | 1.1490866 | 6.0510006 | 9.7792005 | 9.74E-20  | 1.96E-18  | 34.07591  |
| CENPO      | 1.149266  | 4.2415433 | 7.7965122 | 1.11E-13  | 8.68E-13  | 20.350522 |
| THOC5      | 1.1493623 | 4.271393  | 11.24361  | 1.23E-24  | 6.26E-23  | 45.209819 |
| TAX1BP3    | 1.1498488 | 5.6631739 | 6.1755848 | 2.19E-09  | 9.47E-09  | 10.682099 |
| CCDC130    | 1.1502619 | 8.4824079 | 10.837727 | 3.00E-23  | 1.19E-21  | 42.055581 |
| MALAT1     | 1.1503562 | 6.7839758 | 6.920626  | 2.82E-11  | 1.55E-10  | 14.926402 |
| CASC3      | 1.1506027 | 7.3881254 | 9.1805824 | 7.87E-18  | 1.14E-16  | 29.746151 |
| WNK4       | 1.1506083 | 3.3607382 | 4.9563611 | 1.21E-06  | 3.69E-06  | 4.5648344 |
| TBCC       | 1.1506838 | 7.2877649 | 9.4559502 | 1.06E-18  | 1.78E-17  | 31.719886 |
| NENF       | 1.1508636 | 9.6167608 | 9.7991208 | 8.39E-20  | 1.69E-18  | 34.222425 |
| ODAM       | 1.1512086 | 2.5988638 | 3.1923555 | 0.0015641 | 0.0030861 | -2.206593 |
| PIEZO2     | 1.1517521 | 3.6386865 | 6.2660201 | 1.31E-09  | 5.85E-09  | 11.177887 |
| ANAPC11    | 1.1518722 | 11.268615 | 10.880161 | 2.15E-23  | 8.79E-22  | 42.383092 |
| RELB       | 1.1519248 | 8.4169197 | 6.9234604 | 2.77E-11  | 1.52E-10  | 14.943223 |
| F2RL3      | 1.1522703 | 2.4569942 | 6.1371506 | 2.71E-09  | 1.16E-08  | 10.473071 |
| EFNA1      | 1.1525709 | 11.124251 | 6.5950766 | 1.97E-10  | 9.64E-10  | 13.027719 |
| ORMDL2     | 1.1526902 | 7.5305659 | 12.742612 | 6.54E-30  | 8.74E-28  | 57.217143 |
| GINS3      | 1.1528437 | 4.1946364 | 7.6437072 | 3.01E-13  | 2.20E-12  | 19.372736 |
| C11orf80   | 1.1530208 | 3.1299232 | 7.2252644 | 4.32E-12  | 2.68E-11  | 16.762286 |
| FLYWCH2    | 1.1534023 | 5.6171307 | 7.0199983 | 1.54E-11  | 8.82E-11  | 15.5191   |
| THAP8      | 1.1542161 | 6.1296519 | 10.844647 | 2.84E-23  | 1.13E-21  | 42.10895  |
| PHYHIPL    | 1.1543378 | 3.0982875 | 4.7652382 | 2.97E-06  | 8.57E-06  | 3.7070583 |
| TAOK2      | 1.1545154 | 6.3337369 | 10.159571 | 5.57E-21  | 1.40E-19  | 36.898933 |
| NAT8B      | 1.1547032 | 6.6010203 | 4.0287513 | 7.15E-05  | 0.0001721 | 0.6769566 |
| GTSE1      | 1.1547942 | 3.4141438 | 7.4405568 | 1.11E-12  | 7.45E-12  | 18.092882 |
| IPO9       | 1.1549329 | 5.9180594 | 9.5026939 | 7.54E-19  | 1.29E-17  | 32.058023 |
| TEPSIN     | 1.154959  | 7.596647  | 11.96185  | 3.89E-27  | 3.07E-25  | 50.899504 |
| HYOU1      | 1.1554956 | 6.9174102 | 6.3445196 | 8.41E-10  | 3.83E-09  | 11.612693 |
| LARP1      | 1.155525  | 7.1440941 | 9.063493  | 1.83E-17  | 2.48E-16  | 28.916612 |
| DEPDC1B    | 1.156025  | 3.7583724 | 6.5727761 | 2.25E-10  | 1.09E-09  | 12.90012  |
| YEATS2     | 1.156111  | 3.7575169 | 8.4403495 | 1.46E-15  | 1.49E-14  | 24.605642 |
| TCHP       | 1.1561741 | 5.0431732 | 9.7236954 | 1.47E-19  | 2.87E-18  | 33.668461 |
| SLC22A12   | 1.1562675 | 3.8774887 | 3.5635103 | 0.0004268 | 0.0009219 | -1.002517 |
| GRN        | 1.1565558 | 11.757507 | 9.375651  | 1.91E-18  | 3.06E-17  | 31.141084 |
| NAA20      | 1.1566612 | 9.3105883 | 10.305402 | 1.83E-21  | 5.05E-20  | 37.994969 |
| PRKDC      | 1.1566715 | 5.4474929 | 7.2702451 | 3.26E-12  | 2.06E-11  | 17.038054 |
| MYRF       | 1.1567123 | 7.5681535 | 5.3612126 | 1.67E-07  | 5.73E-07  | 6.4750046 |
| DGKQ       | 1.1568576 | 4.7243721 | 9.1626922 | 8.96E-18  | 1.28E-16  | 29.619023 |
| TECPR1     | 1.1569113 | 6.7646421 | 11.095477 | 3.97E-24  | 1.85E-22  | 44.053156 |
| CCDC170    | 1.1571779 | 3.1330022 | 5.1130024 | 5.72E-07  | 1.82E-06  | 5.2890636 |
| MANBAL     | 1.1576725 | 7.5148847 | 12.179743 | 6.63E-28  | 6.04E-26  | 52.649897 |
| C17orf58   | 1.1577247 | 6.1413216 | 9.4533569 | 1.08E-18  | 1.81E-17  | 31.701151 |
| DDX11      | 1.1579992 | 5.3529912 | 7.7251369 | 1.77E-13  | 1.34E-12  | 19.892207 |
| RHOC       | 1.1583926 | 9.8418745 | 9.7384617 | 1.32E-19  | 2.60E-18  | 33.776742 |
| TIGD5      | 1.159007  | 5.5584759 | 10.822194 | 3.39E-23  | 1.32E-21  | 41.935825 |
| ZNF512     | 1.1590327 | 5.3036624 | 8.9693912 | 3.58E-17  | 4.67E-16  | 28.254262 |

|           |           |           |           |           |           |           |
|-----------|-----------|-----------|-----------|-----------|-----------|-----------|
| ARFGAP1   | 1.1592684 | 6.3895209 | 11.572667 | 8.95E-26  | 5.51E-24  | 47.800421 |
| CHEK2     | 1.1593318 | 5.6572139 | 7.0874176 | 1.02E-11  | 5.99E-11  | 15.924637 |
| INO80E    | 1.1593901 | 7.106317  | 10.700036 | 8.77E-23  | 3.16E-21  | 40.99662  |
| Clorf131  | 1.1594149 | 4.8478323 | 8.250901  | 5.34E-15  | 5.04E-14  | 23.331608 |
| LYPD8     | 1.1594812 | 1.3751417 | 4.8139661 | 2.37E-06  | 6.93E-06  | 3.9230251 |
| AATF      | 1.1596649 | 7.6981052 | 11.87525  | 7.84E-27  | 5.71E-25  | 50.206791 |
| MESP1     | 1.1597162 | 5.2304362 | 9.088622  | 1.53E-17  | 2.10E-16  | 29.094142 |
| GSDMD     | 1.1598137 | 8.1179092 | 10.661803 | 1.18E-22  | 4.13E-21  | 40.703615 |
| TXN       | 1.1603634 | 11.877843 | 7.9395968 | 4.32E-14  | 3.60E-13  | 21.277571 |
| TMEM45B   | 1.1605139 | 8.4782525 | 3.2907121 | 0.0011211 | 0.002267  | -1.899451 |
| PTK7      | 1.1607055 | 4.2685009 | 4.5039005 | 9.63E-06  | 2.61E-05  | 2.5811084 |
| CBX4      | 1.1608531 | 5.8939626 | 8.0237607 | 2.47E-14  | 2.13E-13  | 21.827947 |
| MPV17L2   | 1.1610149 | 7.5553776 | 11.210843 | 1.60E-24  | 7.89E-23  | 44.95344  |
| DYNLRB1   | 1.1610244 | 6.4038176 | 11.759239 | 2.00E-26  | 1.35E-24  | 49.281564 |
| ADA       | 1.1619658 | 6.9958727 | 7.6693874 | 2.55E-13  | 1.88E-12  | 19.536165 |
| ZMIZ2     | 1.1620012 | 7.2559369 | 8.9956408 | 2.97E-17  | 3.92E-16  | 28.438631 |
| ZSCAN9    | 1.1622508 | 5.3677394 | 9.9490142 | 2.73E-20  | 6.03E-19  | 35.329683 |
| HCFC1     | 1.1624859 | 4.77523   | 9.2647163 | 4.28E-18  | 6.46E-17  | 30.345833 |
| NDUFAF2   | 1.162848  | 7.7558407 | 10.598466 | 1.93E-22  | 6.38E-21  | 40.219242 |
| FANCE     | 1.1630669 | 5.466759  | 8.0656926 | 1.86E-14  | 1.63E-13  | 22.103536 |
| ARHGAP4   | 1.164123  | 7.7674039 | 5.6035838 | 4.83E-08  | 1.76E-07  | 7.6773961 |
| LEMD2     | 1.1643416 | 7.2601695 | 10.845109 | 2.83E-23  | 1.13E-21  | 42.112512 |
| CAPN12    | 1.1649376 | 5.7963235 | 5.3958866 | 1.41E-07  | 4.85E-07  | 6.6443616 |
| ESPL1     | 1.1651391 | 3.7311659 | 6.0708531 | 3.92E-09  | 1.64E-08  | 10.114876 |
| AARS2     | 1.1658081 | 6.5893874 | 10.223774 | 3.42E-21  | 8.86E-20  | 37.38056  |
| EDC3      | 1.1658847 | 5.2022726 | 11.364669 | 4.71E-25  | 2.54E-23  | 46.159568 |
| PPP1R14B  | 1.1666043 | 9.5200833 | 8.6609789 | 3.16E-16  | 3.54E-15  | 26.11137  |
| EIF2D     | 1.1666553 | 7.1865135 | 11.791013 | 1.55E-26  | 1.07E-24  | 49.534655 |
| IQCE      | 1.1667185 | 5.2069013 | 9.1876544 | 7.48E-18  | 1.08E-16  | 29.796442 |
| AGRN      | 1.1672143 | 6.6867341 | 6.2540578 | 1.41E-09  | 6.24E-09  | 11.111991 |
| HSPA1A    | 1.1678036 | 8.4774761 | 6.1893408 | 2.02E-09  | 8.81E-09  | 10.757156 |
| CUL9      | 1.1685723 | 7.4996459 | 11.064972 | 5.05E-24  | 2.31E-22  | 43.815731 |
| RPS5      | 1.1692341 | 11.38232  | 9.2024128 | 6.73E-18  | 9.83E-17  | 29.901463 |
| E2F5      | 1.1693525 | 4.4261284 | 7.0582865 | 1.22E-11  | 7.08E-11  | 15.749072 |
| VSIG10    | 1.1695519 | 5.6626941 | 8.4959728 | 9.95E-16  | 1.04E-14  | 24.983053 |
| PDZD11    | 1.1697728 | 7.9073775 | 11.85207  | 9.46E-27  | 6.75E-25  | 50.021669 |
| SLC38A6   | 1.1709108 | 6.0753253 | 11.318115 | 6.82E-25  | 3.61E-23  | 45.79387  |
| ABCF2     | 1.1711493 | 5.9138078 | 10.635    | 1.45E-22  | 4.99E-21  | 40.49848  |
| TRMU      | 1.1715355 | 6.6680057 | 10.211045 | 3.76E-21  | 9.73E-20  | 37.284962 |
| LINC00482 | 1.1715589 | 5.4169308 | 7.3639201 | 1.81E-12  | 1.18E-11  | 17.616155 |
| CANT1     | 1.1716041 | 5.4437489 | 9.6540828 | 2.47E-19  | 4.63E-18  | 33.159129 |
| CPD       | 1.1719657 | 7.0121785 | 6.7006146 | 1.06E-10  | 5.36E-10  | 13.635914 |
| SMC4      | 1.172017  | 5.6023162 | 5.5165034 | 7.59E-08  | 2.70E-07  | 7.240424  |
| LDLRAD1   | 1.1723679 | 3.0691163 | 5.1624225 | 4.50E-07  | 1.45E-06  | 5.5214695 |
| BAK1      | 1.1726153 | 6.3296802 | 6.8592862 | 4.09E-11  | 2.19E-10  | 14.563575 |
| SETDB1    | 1.1726744 | 7.0675083 | 8.8146809 | 1.07E-16  | 1.30E-15  | 27.173886 |
| ITGB1BP1  | 1.1737269 | 6.9288609 | 10.973105 | 1.04E-23  | 4.52E-22  | 43.102335 |
| TOMM20    | 1.1739814 | 9.0302476 | 10.169372 | 5.17E-21  | 1.30E-19  | 36.972361 |
| TNNC1     | 1.1743285 | 3.6582159 | 4.0961821 | 5.44E-05  | 0.0001331 | 0.9357295 |
| ALG3      | 1.1754461 | 8.5314205 | 13.093519 | 3.57E-31  | 6.63E-29  | 60.094181 |
| METTL3    | 1.1757771 | 6.4457393 | 9.3377911 | 2.52E-18  | 3.95E-17  | 30.869106 |

|                    |           |           |           |           |           |           |
|--------------------|-----------|-----------|-----------|-----------|-----------|-----------|
| EXOSC4             | 1.1760154 | 8.3821404 | 8.4087544 | 1.81E-15  | 1.83E-14  | 24.391936 |
| SHKBP1             | 1.1762444 | 5.9716407 | 9.0614799 | 1.85E-17  | 2.51E-16  | 28.902401 |
| FAM220A            | 1.1763302 | 6.0317043 | 10.565337 | 2.49E-22  | 7.99E-21  | 39.966388 |
| UBXN11             | 1.1763421 | 5.0667129 | 7.7610648 | 1.40E-13  | 1.07E-12  | 20.122561 |
| FAM193B            | 1.1763795 | 4.8178964 | 9.6242597 | 3.08E-19  | 5.64E-18  | 32.9415   |
| FAT1               | 1.1768371 | 7.4482544 | 5.082984  | 6.62E-07  | 2.09E-06  | 5.1488097 |
| NPM1               | 1.1771034 | 10.165335 | 8.9585584 | 3.87E-17  | 5.03E-16  | 28.178265 |
| RAC3               | 1.1771661 | 5.7696212 | 5.6617745 | 3.56E-08  | 1.32E-07  | 7.9724718 |
| ZNF251             | 1.1774517 | 4.0730718 | 10.365762 | 1.16E-21  | 3.30E-20  | 38.450753 |
| TIMELESS           | 1.1775852 | 5.8291523 | 7.7954913 | 1.12E-13  | 8.72E-13  | 20.343948 |
| CYSTM1             | 1.1777164 | 9.9384653 | 9.3678001 | 2.02E-18  | 3.22E-17  | 31.084636 |
| FAM219A            | 1.1777331 | 6.4969653 | 9.9032616 | 3.85E-20  | 8.27E-19  | 34.990823 |
| ANO10              | 1.1777893 | 5.3619429 | 9.6326634 | 2.89E-19  | 5.33E-18  | 33.002789 |
| PDCD2L             | 1.1792401 | 6.4760304 | 10.266101 | 2.48E-21  | 6.71E-20  | 37.698864 |
| BBC3               | 1.1794078 | 7.7197425 | 8.6582066 | 3.22E-16  | 3.61E-15  | 26.092306 |
| SEMA3G             | 1.1794624 | 4.1800767 | 7.1200524 | 8.31E-12  | 4.96E-11  | 16.121923 |
| POLM               | 1.1796878 | 7.0408322 | 11.23816  | 1.29E-24  | 6.50E-23  | 45.16716  |
| AP1M2              | 1.1800243 | 4.7490672 | 2.8641412 | 0.0044825 | 0.0082013 | -3.168252 |
| FBXL19             | 1.1800323 | 6.0317363 | 9.0028632 | 2.82E-17  | 3.73E-16  | 28.489412 |
| NOL7               | 1.1802052 | 8.6521115 | 11.85617  | 9.15E-27  | 6.58E-25  | 50.054403 |
| DUSP23             | 1.180272  | 11.109092 | 8.9527029 | 4.03E-17  | 5.22E-16  | 28.137207 |
| HSF1               | 1.1810647 | 9.4252807 | 9.3301402 | 2.66E-18  | 4.16E-17  | 30.814215 |
| GTSF1              | 1.1817223 | 2.8659499 | 3.2361825 | 0.0013497 | 0.0026923 | -2.070804 |
| MRAP2              | 1.181821  | 2.9586781 | 6.1597068 | 2.39E-09  | 1.03E-08  | 10.595623 |
| SMO                | 1.182736  | 8.1574712 | 6.2274611 | 1.63E-09  | 7.19E-09  | 10.965822 |
| MTFP1              | 1.1827682 | 6.3960157 | 8.5007125 | 9.63E-16  | 1.01E-14  | 25.015282 |
| CAMK2N2            | 1.1827694 | 5.3209601 | 5.3450981 | 1.82E-07  | 6.20E-07  | 6.3966023 |
| CCDC97             | 1.1828172 | 7.448738  | 10.366366 | 1.15E-21  | 3.29E-20  | 38.455315 |
| PIF1               | 1.1835131 | 3.7879853 | 7.4826137 | 8.49E-13  | 5.79E-12  | 18.355929 |
| PSMC4              | 1.1835627 | 8.4820195 | 13.329584 | 4.98E-32  | 1.07E-29  | 62.040992 |
| TRIM28             | 1.1836807 | 8.577376  | 9.6193468 | 3.19E-19  | 5.81E-18  | 32.905682 |
| PKDCC              | 1.1837161 | 6.4658023 | 4.8969284 | 1.61E-06  | 4.80E-06  | 4.2950262 |
| MAPKAPK5- <i>l</i> | 1.1839116 | 5.1218441 | 11.440016 | 2.58E-25  | 1.47E-23  | 46.752662 |
| CD200              | 1.1842777 | 4.1502927 | 8.1112245 | 1.37E-14  | 1.22E-13  | 22.403819 |
| COX6C              | 1.184653  | 11.628721 | 9.0549473 | 1.94E-17  | 2.62E-16  | 28.856301 |
| SNHG20             | 1.1848449 | 4.4656846 | 9.58045   | 4.25E-19  | 7.54E-18  | 32.622438 |
| PP7080             | 1.1854689 | 5.475591  | 7.0355558 | 1.40E-11  | 8.08E-11  | 15.612437 |
| UBR5-AS1           | 1.1856373 | 4.8661187 | 9.2248419 | 5.72E-18  | 8.42E-17  | 30.061247 |
| FOXK1              | 1.1860328 | 4.9099505 | 8.7618553 | 1.56E-16  | 1.84E-15  | 26.80748  |
| EME1               | 1.1861737 | 3.7390128 | 8.1620261 | 9.74E-15  | 8.83E-14  | 22.740115 |
| ATXN7L3            | 1.1863047 | 6.4558747 | 8.2212492 | 6.53E-15  | 6.06E-14  | 23.133821 |
| CSNK1E             | 1.1864567 | 7.2860725 | 8.39692   | 1.97E-15  | 1.97E-14  | 24.312015 |
| NEIL3              | 1.1865171 | 2.1422353 | 7.4624759 | 9.65E-13  | 6.53E-12  | 18.22985  |
| COL7A1             | 1.1867977 | 4.2453573 | 4.9923863 | 1.02E-06  | 3.15E-06  | 4.7297176 |
| ANXA2R             | 1.1869208 | 5.5181052 | 8.7786595 | 1.38E-16  | 1.64E-15  | 26.923898 |
| RPS10              | 1.1872126 | 11.465505 | 8.5831694 | 5.43E-16  | 5.90E-15  | 25.577692 |
| UBE2A              | 1.1874919 | 8.4059629 | 10.118321 | 7.61E-21  | 1.87E-19  | 36.590254 |
| SPAG4              | 1.1878152 | 5.4099179 | 6.2176225 | 1.73E-09  | 7.58E-09  | 10.911873 |
| CAPN10             | 1.1879229 | 6.198992  | 11.222865 | 1.45E-24  | 7.25E-23  | 45.047471 |
| PECAM1             | 1.188059  | 7.5714569 | 7.9933511 | 3.02E-14  | 2.58E-13  | 21.628659 |
| NAT14              | 1.1884203 | 6.0818577 | 6.8116499 | 5.45E-11  | 2.87E-10  | 14.283415 |

|          |           |           |           |           |           |           |
|----------|-----------|-----------|-----------|-----------|-----------|-----------|
| FUS      | 1.1885664 | 8.3364282 | 9.1085587 | 1.32E-17  | 1.83E-16  | 29.235186 |
| KCTD17   | 1.188733  | 4.5813126 | 5.0320499 | 8.46E-07  | 2.63E-06  | 4.9124163 |
| OCRL     | 1.1887345 | 5.4031981 | 8.2647436 | 4.86E-15  | 4.62E-14  | 23.424095 |
| SLC25A29 | 1.1888842 | 6.52278   | 9.1307123 | 1.13E-17  | 1.58E-16  | 29.392115 |
| NRBP2    | 1.1890975 | 7.9040408 | 5.7604978 | 2.11E-08  | 8.07E-08  | 8.4786609 |
| ZBTB7B   | 1.1892657 | 6.4272953 | 8.0258042 | 2.43E-14  | 2.10E-13  | 21.841356 |
| LSM2     | 1.1895484 | 5.8244402 | 10.246461 | 2.87E-21  | 7.65E-20  | 37.551092 |
| CPSF4    | 1.19012   | 7.0305896 | 12.425453 | 8.89E-29  | 9.38E-27  | 54.635921 |
| CIZ1     | 1.1901562 | 6.7698144 | 9.3749323 | 1.92E-18  | 3.07E-17  | 31.135915 |
| TYMSOS   | 1.1902875 | 5.0070231 | 6.1668469 | 2.30E-09  | 9.93E-09  | 10.634489 |
| SNX27    | 1.1909568 | 6.4948637 | 8.6340898 | 3.81E-16  | 4.24E-15  | 25.926621 |
| CAPN2    | 1.1912143 | 9.1114013 | 7.4042704 | 1.40E-12  | 9.28E-12  | 17.866737 |
| DUT      | 1.1917807 | 7.4797691 | 9.2934564 | 3.48E-18  | 5.33E-17  | 30.551368 |
| COL1A2   | 1.1919305 | 6.718794  | 3.636923  | 0.0003257 | 0.0007166 | -0.749947 |
| NUP210   | 1.1922068 | 5.6739578 | 7.6097836 | 3.75E-13  | 2.70E-12  | 19.157407 |
| ANKRD65  | 1.1925011 | 5.2809826 | 4.7636895 | 2.99E-06  | 8.63E-06  | 3.700225  |
| SLC16A3  | 1.1930788 | 7.3129139 | 4.781775  | 2.75E-06  | 7.98E-06  | 3.7801404 |
| PSMD10   | 1.193093  | 7.6370181 | 9.8231522 | 7.01E-20  | 1.43E-18  | 34.399378 |
| FGD1     | 1.1932067 | 4.7303976 | 7.716627  | 1.87E-13  | 1.41E-12  | 19.837748 |
| SH3PXD2B | 1.1934809 | 3.663678  | 8.4546131 | 1.32E-15  | 1.35E-14  | 24.702279 |
| PACS2    | 1.1935695 | 5.9542078 | 11.280797 | 9.17E-25  | 4.77E-23  | 45.501147 |
| SRM      | 1.1936368 | 8.2447756 | 9.561499  | 4.89E-19  | 8.60E-18  | 32.484655 |
| ATP13A2  | 1.1940114 | 5.2880808 | 7.8529092 | 7.66E-14  | 6.12E-13  | 20.714611 |
| RRAGD    | 1.1941286 | 5.5402913 | 6.8464987 | 4.42E-11  | 2.36E-10  | 14.48823  |
| HM13     | 1.1941708 | 7.900912  | 13.08358  | 3.87E-31  | 7.06E-29  | 60.01241  |
| UBL4A    | 1.1944763 | 6.7301538 | 10.399587 | 8.91E-22  | 2.60E-20  | 38.706703 |
| SPATC1L  | 1.1945418 | 3.7729812 | 7.0789785 | 1.07E-11  | 6.29E-11  | 15.873724 |
| NAGPA    | 1.1947958 | 6.7395345 | 10.862308 | 2.48E-23  | 1.00E-21  | 42.24523  |
| CCT5     | 1.1953321 | 7.6150027 | 8.7264525 | 2.00E-16  | 2.30E-15  | 26.562641 |
| PDRG1    | 1.1953702 | 7.5620398 | 10.885264 | 2.07E-23  | 8.47E-22  | 42.422513 |
| LZTS2    | 1.1955408 | 7.5912003 | 7.7960639 | 1.11E-13  | 8.70E-13  | 20.347635 |
| MRPL9    | 1.1964219 | 8.9527754 | 10.540268 | 3.02E-22  | 9.53E-21  | 39.775289 |
| CYB5R1   | 1.1965992 | 8.0321875 | 10.674074 | 1.07E-22  | 3.79E-21  | 40.797602 |
| ANKS3    | 1.1969948 | 6.212843  | 10.375438 | 1.07E-21  | 3.09E-20  | 38.523932 |
| KLHL23   | 1.1978236 | 5.1262572 | 7.0661902 | 1.16E-11  | 6.77E-11  | 15.796655 |
| RALY     | 1.1987791 | 7.2789363 | 10.834295 | 3.08E-23  | 1.21E-21  | 42.029115 |
| INTS8    | 1.1988435 | 5.2503235 | 9.9058599 | 3.78E-20  | 8.14E-19  | 35.010046 |
| PARP1    | 1.1997128 | 9.0516625 | 9.3199252 | 2.87E-18  | 4.44E-17  | 30.740966 |
| BRICD5   | 1.2000018 | 4.6902903 | 7.6732185 | 2.48E-13  | 1.84E-12  | 19.560577 |
| IFT52    | 1.2002137 | 4.4205511 | 8.9245823 | 4.93E-17  | 6.28E-16  | 27.940245 |
| ABHD4    | 1.2004295 | 7.310338  | 8.5906538 | 5.16E-16  | 5.62E-15  | 25.628902 |
| MRPS23   | 1.2006772 | 6.5024964 | 12.067927 | 1.65E-27  | 1.39E-25  | 51.750338 |
| FAM53B   | 1.2007502 | 5.3398046 | 8.8096556 | 1.11E-16  | 1.34E-15  | 27.138975 |
| RTN2     | 1.2008182 | 4.938565  | 5.6500909 | 3.79E-08  | 1.40E-07  | 7.9130295 |
| MICAL1   | 1.2013856 | 5.8792168 | 6.2478579 | 1.46E-09  | 6.46E-09  | 11.077875 |
| TBC1D31  | 1.2014757 | 5.0073433 | 11.045522 | 5.88E-24  | 2.65E-22  | 43.664487 |
| NUP37    | 1.2015196 | 6.2794475 | 10.449853 | 6.06E-22  | 1.82E-20  | 39.087768 |
| RPS21    | 1.202274  | 11.608881 | 8.2960703 | 3.92E-15  | 3.78E-14  | 23.633752 |
| HOMER3   | 1.2023472 | 7.3946062 | 6.048413  | 4.44E-09  | 1.85E-08  | 9.9943189 |
| CEBPA    | 1.2039073 | 10.747511 | 5.570976  | 5.72E-08  | 2.06E-07  | 7.5131213 |
| ZFAS1    | 1.2039356 | 7.639322  | 7.2854797 | 2.96E-12  | 1.88E-11  | 17.131724 |

|             |           |           |           |           |           |           |
|-------------|-----------|-----------|-----------|-----------|-----------|-----------|
| GTF2IRD1    | 1.2051371 | 4.8422328 | 7.9115404 | 5.20E-14  | 4.28E-13  | 21.094931 |
| PLXND1      | 1.2052904 | 6.6379098 | 7.5634909 | 5.05E-13  | 3.56E-12  | 18.864598 |
| TINAG       | 1.2056441 | 2.3869183 | 3.8342963 | 0.0001541 | 0.000355  | -0.04767  |
| DNMT3A      | 1.2056875 | 4.9003784 | 8.4852537 | 1.07E-15  | 1.11E-14  | 24.910206 |
| NVL         | 1.2059378 | 6.7676176 | 11.249719 | 1.17E-24  | 6.01E-23  | 45.257653 |
| BCAM        | 1.2067685 | 10.400757 | 5.5448508 | 6.55E-08  | 2.35E-07  | 7.3820641 |
| WASF2       | 1.2078656 | 7.37813   | 8.2806999 | 4.36E-15  | 4.17E-14  | 23.530823 |
| COR01B      | 1.208315  | 7.0417374 | 10.585533 | 2.13E-22  | 6.97E-21  | 40.120492 |
| CRELD2      | 1.208332  | 8.9597312 | 9.3176004 | 2.92E-18  | 4.50E-17  | 30.724301 |
| GPRIN1      | 1.2088052 | 3.0744488 | 7.6371947 | 3.14E-13  | 2.28E-12  | 19.331348 |
| LPGAT1      | 1.2089179 | 7.8266707 | 7.5165447 | 6.83E-13  | 4.74E-12  | 18.568885 |
| SLC39A13    | 1.2095442 | 8.5038611 | 11.48727  | 1.77E-25  | 1.03E-23  | 47.125389 |
| DPH2        | 1.2116753 | 6.8961337 | 9.8252259 | 6.91E-20  | 1.41E-18  | 34.414658 |
| DNAJC5      | 1.2116912 | 6.6059108 | 9.8031886 | 8.14E-20  | 1.65E-18  | 34.252363 |
| POLE2       | 1.2117477 | 4.0163007 | 8.2306937 | 6.12E-15  | 5.73E-14  | 23.196771 |
| ARPC1B      | 1.2118353 | 9.4426711 | 7.4969254 | 7.75E-13  | 5.33E-12  | 18.445672 |
| CPLX1       | 1.2119706 | 4.0780041 | 4.9505536 | 1.25E-06  | 3.79E-06  | 4.5383486 |
| ALPK3       | 1.2128013 | 3.2057383 | 5.8073636 | 1.65E-08  | 6.36E-08  | 8.721397  |
| CST1        | 1.2129369 | 2.5489894 | 3.167435  | 0.0016996 | 0.0033256 | -2.283034 |
| FASTK       | 1.2134295 | 9.4663381 | 12.657206 | 1.32E-29  | 1.69E-27  | 56.520188 |
| NFKB2       | 1.2148912 | 6.2038723 | 9.0569861 | 1.92E-17  | 2.59E-16  | 28.870687 |
| BOLA3       | 1.2158175 | 8.2517648 | 11.010294 | 7.76E-24  | 3.44E-22  | 43.390833 |
| SNAPIN      | 1.2166017 | 8.3263267 | 12.596018 | 2.19E-29  | 2.69E-27  | 56.021698 |
| C20orf96    | 1.2168327 | 4.3183655 | 9.5662127 | 4.72E-19  | 8.33E-18  | 32.518913 |
| MAZ         | 1.2174623 | 5.9615477 | 6.9689086 | 2.10E-11  | 1.18E-10  | 15.213625 |
| MAP2        | 1.2177027 | 3.1383531 | 5.6460296 | 3.87E-08  | 1.43E-07  | 7.8923897 |
| GSDMB       | 1.2178764 | 7.7366901 | 6.4262411 | 5.26E-10  | 2.44E-09  | 12.069697 |
| AACS        | 1.2188604 | 6.1322515 | 7.7211078 | 1.82E-13  | 1.37E-12  | 19.866418 |
| CDC7        | 1.2195761 | 4.3862145 | 7.7271168 | 1.75E-13  | 1.32E-12  | 19.904883 |
| TSSK6       | 1.2197424 | 2.9365285 | 10.022662 | 1.57E-20  | 3.62E-19  | 35.876753 |
| NECTIN1     | 1.2201019 | 4.8816431 | 7.1368535 | 7.49E-12  | 4.49E-11  | 16.223739 |
| PLPPR1      | 1.2201372 | 5.0008611 | 5.5701571 | 5.75E-08  | 2.07E-07  | 7.5090054 |
| TTYH3       | 1.220252  | 6.7240375 | 5.6938752 | 3.01E-08  | 1.13E-07  | 8.1362957 |
| RPL38       | 1.2203449 | 12.813105 | 9.6068755 | 3.50E-19  | 6.33E-18  | 32.814802 |
| LPL         | 1.2204306 | 4.1013992 | 7.4861098 | 8.30E-13  | 5.68E-12  | 18.377841 |
| NUDT2       | 1.2208968 | 7.4643434 | 9.8814484 | 4.54E-20  | 9.63E-19  | 34.82954  |
| THUMPD3-AS1 | 1.221402  | 6.039042  | 9.4493915 | 1.11E-18  | 1.86E-17  | 31.672511 |
| IRF3        | 1.2214167 | 7.7895405 | 11.479434 | 1.89E-25  | 1.09E-23  | 47.063541 |
| CPXM1       | 1.221707  | 3.6818887 | 6.1779861 | 2.16E-09  | 9.35E-09  | 10.695192 |
| FKBP11      | 1.2219914 | 9.1374074 | 7.3501855 | 1.97E-12  | 1.28E-11  | 17.531075 |
| CHAF1B      | 1.22228   | 4.5499433 | 7.462276  | 9.67E-13  | 6.53E-12  | 18.2286   |
| CA12        | 1.2229358 | 3.215169  | 3.829225  | 0.0001571 | 0.0003617 | -0.066136 |
| TRIM50      | 1.2231613 | 3.5197953 | 3.7229745 | 0.0002359 | 0.0005302 | -0.447914 |
| RNF215      | 1.2235918 | 4.9795993 | 11.600564 | 7.16E-26  | 4.53E-24  | 48.021342 |
| SLC39A7     | 1.2237659 | 8.0565855 | 10.099017 | 8.81E-21  | 2.14E-19  | 36.446005 |
| MAPK3       | 1.224832  | 6.3464449 | 11.046456 | 5.84E-24  | 2.63E-22  | 43.671747 |
| LIN37       | 1.2262028 | 6.4941236 | 13.78578  | 1.09E-33  | 3.29E-31  | 65.826122 |
| MRGBP       | 1.2266331 | 6.3044019 | 12.280462 | 2.91E-28  | 2.80E-26  | 53.462477 |
| TTLL4       | 1.2266905 | 4.7190031 | 6.7986105 | 5.89E-11  | 3.09E-10  | 14.206975 |
| BRMS1       | 1.2268053 | 7.9008325 | 12.63696  | 1.56E-29  | 1.96E-27  | 56.355172 |
| BGLAP       | 1.2274528 | 4.7422614 | 8.3723279 | 2.33E-15  | 2.31E-14  | 24.146158 |

|          |            |            |            |            |            |            |
|----------|------------|------------|------------|------------|------------|------------|
| DDX41    | 1. 2275005 | 8. 1455736 | 14. 822551 | 1. 66E-37  | 8. 57E-35  | 74. 518459 |
| HAUS5    | 1. 2275268 | 3. 602026  | 10. 662441 | 1. 17E-22  | 4. 12E-21  | 40. 708496 |
| SOX13    | 1. 2275296 | 6. 1822068 | 9. 1570635 | 9. 33E-18  | 1. 33E-16  | 29. 579054 |
| SLC12A7  | 1. 2277712 | 7. 2159854 | 9. 2477318 | 4. 85E-18  | 7. 20E-17  | 30. 224531 |
| NUPR1    | 1. 2280947 | 10. 744408 | 6. 409349  | 5. 80E-10  | 2. 68E-09  | 11. 974871 |
| RAB1F    | 1. 2283926 | 5. 4380184 | 13. 344018 | 4. 42E-32  | 9. 72E-30  | 62. 160302 |
| RECQL5   | 1. 2284592 | 4. 9907818 | 12. 265872 | 3. 28E-28  | 3. 13E-26  | 53. 344632 |
| ATP6V1F  | 1. 228597  | 9. 9131344 | 10. 861171 | 2. 50E-23  | 1. 01E-21  | 42. 236459 |
| RPL30    | 1. 2286521 | 13. 270493 | 9. 4958654 | 7. 93E-19  | 1. 35E-17  | 32. 008571 |
| MRPL24   | 1. 2287663 | 10. 427564 | 11. 246707 | 1. 20E-24  | 6. 13E-23  | 45. 234068 |
| FBL      | 1. 228799  | 10. 080527 | 8. 7816877 | 1. 35E-16  | 1. 61E-15  | 26. 94489  |
| DAP3     | 1. 228816  | 10. 45252  | 12. 89578  | 1. 84E-30  | 2. 77E-28  | 58. 470346 |
| CPSF1    | 1. 230109  | 6. 8911979 | 10. 324196 | 1. 59E-21  | 4. 43E-20  | 38. 136749 |
| DYNLL1   | 1. 230983  | 10. 921344 | 12. 28591  | 2. 79E-28  | 2. 69E-26  | 53. 506485 |
| MAP2K2   | 1. 2317556 | 8. 653286  | 12. 833263 | 3. 09E-30  | 4. 46E-28  | 57. 958341 |
| XRCC1    | 1. 2317998 | 8. 0870479 | 10. 931732 | 1. 44E-23  | 6. 12E-22  | 42. 78186  |
| DARS2    | 1. 2330955 | 5. 8815817 | 8. 8586627 | 7. 86E-17  | 9. 75E-16  | 27. 479922 |
| ALG1L    | 1. 2337016 | 5. 4177211 | 6. 6979934 | 1. 07E-10  | 5. 43E-10  | 13. 620722 |
| DCTN2    | 1. 2343906 | 8. 8224003 | 12. 433693 | 8. 31E-29  | 8. 87E-27  | 54. 702739 |
| PLAU     | 1. 2348025 | 6. 1357057 | 6. 8462246 | 4. 42E-11  | 2. 36E-10  | 14. 486616 |
| LAMA3    | 1. 2348647 | 3. 2445027 | 5. 2322102 | 3. 19E-07  | 1. 05E-06  | 5. 8528229 |
| C15orf39 | 1. 2353442 | 6. 2164397 | 7. 5855084 | 4. 38E-13  | 3. 12E-12  | 19. 003713 |
| DOCK6    | 1. 2360431 | 6. 3407747 | 10. 750604 | 5. 92E-23  | 2. 21E-21  | 41. 384851 |
| GALNT10  | 1. 2361337 | 3. 9691973 | 9. 8745104 | 4. 78E-20  | 1. 01E-18  | 34. 778278 |
| OLFML2B  | 1. 236216  | 4. 3936769 | 8. 1878923 | 8. 18E-15  | 7. 48E-14  | 22. 91185  |
| CHEK1    | 1. 2369115 | 4. 1154701 | 8. 4162609 | 1. 72E-15  | 1. 74E-14  | 24. 442665 |
| PIR      | 1. 2369509 | 8. 5193453 | 6. 64245   | 1. 49E-10  | 7. 40E-10  | 13. 299842 |
| SPTAN1   | 1. 2370043 | 8. 101609  | 10. 582854 | 2. 17E-22  | 7. 09E-21  | 40. 100041 |
| ANKRD27  | 1. 2372581 | 5. 7125354 | 8. 1660041 | 9. 48E-15  | 8. 61E-14  | 22. 766504 |
| C20orf27 | 1. 2374848 | 5. 9799083 | 9. 9421679 | 2. 88E-20  | 6. 29E-19  | 35. 278927 |
| SCAMP5   | 1. 2379914 | 3. 9408945 | 5. 4100138 | 1. 31E-07  | 4. 53E-07  | 6. 7136192 |
| ERBB3    | 1. 2381662 | 6. 8084329 | 7. 8751597 | 6. 62E-14  | 5. 34E-13  | 20. 858726 |
| CCHCR1   | 1. 238304  | 5. 6669566 | 10. 865079 | 2. 42E-23  | 9. 82E-22  | 42. 266623 |
| BEX2     | 1. 2389445 | 6. 0997016 | 3. 2065534 | 0. 0014914 | 0. 0029547 | -2. 162792 |
| POC1A    | 1. 2398268 | 5. 3519298 | 9. 612548  | 3. 35E-19  | 6. 09E-18  | 32. 856131 |
| DDIT3    | 1. 2411095 | 7. 0274348 | 7. 6584618 | 2. 73E-13  | 2. 01E-12  | 19. 46659  |
| TNFRSF4  | 1. 2412991 | 4. 0105986 | 10. 263516 | 2. 52E-21  | 6. 82E-20  | 37. 679409 |
| PLCB1    | 1. 2414274 | 4. 9940449 | 6. 2925072 | 1. 13E-09  | 5. 08E-09  | 11. 324138 |
| RAD51    | 1. 2416675 | 4. 4639737 | 8. 0397635 | 2. 22E-14  | 1. 93E-13  | 21. 933014 |
| ALS2CL   | 1. 2417806 | 5. 6207931 | 6. 6148507 | 1. 75E-10  | 8. 65E-10  | 13. 141131 |
| RPSA     | 1. 2418214 | 11. 607825 | 9. 0661375 | 1. 79E-17  | 2. 44E-16  | 28. 935282 |
| ASNS     | 1. 2424461 | 6. 2441904 | 4. 9796708 | 1. 09E-06  | 3. 33E-06  | 4. 6714054 |
| ZNF706   | 1. 2425468 | 7. 6411781 | 10. 233045 | 3. 18E-21  | 8. 39E-20  | 37. 45023  |
| TOR3A    | 1. 2429219 | 8. 3219341 | 7. 5778864 | 4. 60E-13  | 3. 27E-12  | 18. 955524 |
| IRX3     | 1. 24309   | 5. 1747546 | 4. 9886511 | 1. 04E-06  | 3. 20E-06  | 4. 7125751 |
| CCDC167  | 1. 2437256 | 8. 520648  | 10. 01764  | 1. 63E-20  | 3. 75E-19  | 35. 839386 |
| SNHG11   | 1. 2440005 | 7. 2417494 | 8. 5998033 | 4. 84E-16  | 5. 31E-15  | 25. 69154  |
| PHF19    | 1. 2442208 | 5. 0214496 | 8. 2856623 | 4. 21E-15  | 4. 05E-14  | 23. 564041 |
| CBFA2T2  | 1. 2442968 | 4. 4891364 | 9. 8513419 | 5. 68E-20  | 1. 18E-18  | 34. 607228 |
| STXBP6   | 1. 2457411 | 3. 9989791 | 8. 6426628 | 3. 59E-16  | 4. 00E-15  | 25. 985487 |
| C19orf25 | 1. 2461131 | 6. 8150453 | 11. 110683 | 3. 52E-24  | 1. 65E-22  | 44. 171607 |

|           |           |           |           |           |           |           |
|-----------|-----------|-----------|-----------|-----------|-----------|-----------|
| CRYGS     | 1.2463662 | 5.1679834 | 7.9230362 | 4.82E-14  | 3.99E-13  | 21.169715 |
| GRK6      | 1.2464406 | 6.4946352 | 11.431797 | 2.76E-25  | 1.56E-23  | 46.6879   |
| ARRDC2    | 1.2467603 | 7.6143392 | 5.703605  | 2.86E-08  | 1.07E-07  | 8.1860974 |
| PIGT      | 1.2469483 | 8.4200793 | 11.578611 | 8.53E-26  | 5.27E-24  | 47.847473 |
| ALYREF    | 1.2469708 | 7.7723886 | 9.0865071 | 1.55E-17  | 2.13E-16  | 29.079191 |
| SLC39A1   | 1.2473266 | 8.7341138 | 9.7481769 | 1.23E-19  | 2.42E-18  | 33.848028 |
| CLIC1     | 1.2476162 | 8.5171501 | 7.8311663 | 8.84E-14  | 7.00E-13  | 20.574039 |
| ABHD12    | 1.2490454 | 7.0541879 | 11.842783 | 1.02E-26  | 7.21E-25  | 49.947531 |
| RAMP1     | 1.2495407 | 9.5695847 | 4.2115634 | 3.38E-05  | 8.50E-05  | 1.3873786 |
| RPL39L    | 1.2502718 | 5.3127497 | 3.8993431 | 0.0001196 | 0.0002794 | 0.1911318 |
| HRAS      | 1.2514752 | 6.5765118 | 11.314133 | 7.04E-25  | 3.71E-23  | 45.762617 |
| APBB3     | 1.2519332 | 7.3391115 | 7.9803983 | 3.29E-14  | 2.79E-13  | 21.543921 |
| AIFM2     | 1.2519701 | 7.8134788 | 9.3120704 | 3.04E-18  | 4.68E-17  | 30.684671 |
| PI4KB     | 1.2521212 | 7.1866475 | 10.170247 | 5.13E-21  | 1.30E-19  | 36.978919 |
| IL3RA     | 1.2521421 | 5.1559992 | 11.732035 | 2.49E-26  | 1.66E-24  | 49.06507  |
| E2F8      | 1.2521816 | 2.9123467 | 7.472497  | 9.06E-13  | 6.15E-12  | 18.292561 |
| SUV39H1   | 1.252295  | 5.2971993 | 10.892268 | 1.96E-23  | 8.03E-22  | 42.476642 |
| RASSF4    | 1.2527873 | 7.6927517 | 7.92238   | 4.84E-14  | 4.01E-13  | 21.165445 |
| LINC01341 | 1.2533437 | 5.4290988 | 7.0093872 | 1.64E-11  | 9.35E-11  | 15.455524 |
| ARPC5     | 1.2534136 | 9.0666294 | 11.479621 | 1.88E-25  | 1.09E-23  | 47.065017 |
| GIPC1     | 1.2536122 | 7.7131969 | 9.6472832 | 2.59E-19  | 4.84E-18  | 33.10948  |
| C1QTNF3   | 1.2538965 | 4.0415891 | 4.2941382 | 2.38E-05  | 6.12E-05  | 1.717426  |
| NAA40     | 1.254065  | 4.423506  | 8.8720181 | 7.15E-17  | 8.90E-16  | 27.573026 |
| PCED1A    | 1.254409  | 6.0174797 | 9.8202654 | 7.17E-20  | 1.46E-18  | 34.37811  |
| SNRPA     | 1.2547749 | 7.9961122 | 12.13905  | 9.23E-28  | 8.20E-26  | 52.322207 |
| HEY1      | 1.2552696 | 5.2739721 | 7.9652462 | 3.64E-14  | 3.07E-13  | 21.444906 |
| MEA1      | 1.2555414 | 8.366083  | 13.120666 | 2.84E-31  | 5.46E-29  | 60.317621 |
| PLXNA1    | 1.2573734 | 4.5304043 | 7.1353395 | 7.56E-12  | 4.53E-11  | 16.214557 |
| TDGF1     | 1.2573889 | 4.2727745 | 3.8598121 | 0.0001395 | 0.0003231 | 0.045572  |
| TMEM81    | 1.2576985 | 4.1057691 | 12.944328 | 1.23E-30  | 1.95E-28  | 58.868416 |
| MYL6B     | 1.2580695 | 8.2466959 | 8.2188391 | 6.63E-15  | 6.15E-14  | 23.117764 |
| RRP9      | 1.2582403 | 6.9968649 | 11.941895 | 4.57E-27  | 3.57E-25  | 50.739728 |
| NCAPH2    | 1.2588001 | 6.6623192 | 10.765945 | 5.25E-23  | 1.99E-21  | 41.502788 |
| ZNF512B   | 1.2593015 | 7.2148107 | 9.0324634 | 2.28E-17  | 3.05E-16  | 28.697775 |
| RAD9A     | 1.2596558 | 5.356477  | 10.584903 | 2.14E-22  | 6.99E-21  | 40.115679 |
| IGF2BP2   | 1.2597797 | 3.4689059 | 4.7954398 | 2.58E-06  | 7.52E-06  | 3.8406934 |
| SP5       | 1.260688  | 6.1468964 | 4.8307449 | 2.19E-06  | 6.44E-06  | 3.9978242 |
| PRUNE1    | 1.2612295 | 4.4869636 | 8.8243252 | 1.00E-16  | 1.22E-15  | 27.240918 |
| TMEM104   | 1.2619702 | 6.7103521 | 11.004024 | 8.15E-24  | 3.60E-22  | 43.342165 |
| ZBED6CL   | 1.2619872 | 6.9722974 | 7.3938748 | 1.49E-12  | 9.87E-12  | 17.80209  |
| EDIL3     | 1.2624307 | 2.27831   | 6.6988945 | 1.07E-10  | 5.41E-10  | 13.625945 |
| RNF187    | 1.2624338 | 7.9050796 | 10.920361 | 1.57E-23  | 6.61E-22  | 42.69387  |
| NAXE      | 1.2626052 | 9.0755006 | 12.498494 | 4.88E-29  | 5.61E-27  | 55.228663 |
| EHMT2     | 1.2638127 | 4.6946652 | 11.156071 | 2.46E-24  | 1.19E-22  | 44.525552 |
| B4GALT3   | 1.2647981 | 7.6501848 | 11.272628 | 9.78E-25  | 5.03E-23  | 45.437116 |
| TPD52L2   | 1.2654715 | 6.5991893 | 10.924891 | 1.52E-23  | 6.43E-22  | 42.728917 |
| PIAS3     | 1.2657751 | 5.1295264 | 7.6961348 | 2.14E-13  | 1.60E-12  | 19.706773 |
| SPDL1     | 1.2661011 | 4.6142338 | 9.6684494 | 2.22E-19  | 4.20E-18  | 33.264091 |
| COMMD4    | 1.2662126 | 8.1200222 | 14.034832 | 1.33E-34  | 4.53E-32  | 67.903872 |
| CCDC107   | 1.2662139 | 7.5145433 | 12.365945 | 1.45E-28  | 1.49E-26  | 54.153792 |
| AKAP8L    | 1.2662782 | 7.3217048 | 12.475927 | 5.88E-29  | 6.59E-27  | 55.04541  |

|          |           |           |           |           |           |           |
|----------|-----------|-----------|-----------|-----------|-----------|-----------|
| MAGED2   | 1.266299  | 9.1749509 | 10.62354  | 1.59E-22  | 5.41E-21  | 40.410842 |
| SFI1     | 1.2663448 | 5.8742284 | 8.3293006 | 3.13E-15  | 3.05E-14  | 23.856685 |
| DONSON   | 1.2667126 | 6.2501349 | 8.8217735 | 1.02E-16  | 1.24E-15  | 27.223178 |
| SIPA1L3  | 1.2676737 | 4.0751852 | 7.7594943 | 1.42E-13  | 1.08E-12  | 20.112476 |
| NCAPH    | 1.267847  | 4.0343893 | 8.1035884 | 1.44E-14  | 1.28E-13  | 22.353385 |
| SQSTM1   | 1.2679574 | 9.6332009 | 6.3890594 | 6.52E-10  | 3.00E-09  | 11.861222 |
| IL32     | 1.2680127 | 10.995294 | 5.335959  | 1.90E-07  | 6.47E-07  | 6.3522232 |
| CKAP2    | 1.2686798 | 4.1753232 | 7.6399433 | 3.08E-13  | 2.24E-12  | 19.348813 |
| TMEM98   | 1.2703549 | 7.4329594 | 4.8894242 | 1.67E-06  | 4.97E-06  | 4.2611552 |
| TMEM147  | 1.270833  | 9.5025905 | 9.4936071 | 8.06E-19  | 1.38E-17  | 31.992221 |
| TMEM101  | 1.2709025 | 6.9332295 | 11.844931 | 1.00E-26  | 7.12E-25  | 49.964675 |
| RAB3B    | 1.2710912 | 3.6312337 | 6.5454202 | 2.64E-10  | 1.27E-09  | 12.744032 |
| CKB      | 1.2713119 | 8.4382672 | 3.4930924 | 0.0005509 | 0.0011675 | -1.240343 |
| RPL36A   | 1.2716092 | 9.3615857 | 8.0449199 | 2.14E-14  | 1.87E-13  | 21.966897 |
| PDGFB    | 1.2718249 | 4.7165143 | 7.8926889 | 5.89E-14  | 4.79E-13  | 20.972448 |
| REPIN1   | 1.2720703 | 9.1421685 | 10.622211 | 1.60E-22  | 5.46E-21  | 40.40068  |
| CDK16    | 1.2721088 | 5.7254622 | 9.4188354 | 1.39E-18  | 2.28E-17  | 31.452032 |
| IMPDH2   | 1.2735073 | 8.2581826 | 9.8971512 | 4.03E-20  | 8.63E-19  | 34.945626 |
| MAST2    | 1.2735886 | 5.9030752 | 9.6228329 | 3.11E-19  | 5.68E-18  | 32.931097 |
| MAST3    | 1.2751644 | 6.0749409 | 10.04648  | 1.31E-20  | 3.08E-19  | 36.054101 |
| PSMB4    | 1.2766289 | 12.050391 | 14.024022 | 1.46E-34  | 4.87E-32  | 67.813542 |
| MPV17    | 1.2772907 | 6.2433509 | 10.327089 | 1.55E-21  | 4.34E-20  | 38.158583 |
| LIMK2    | 1.2774573 | 6.2011341 | 6.9492153 | 2.37E-11  | 1.32E-10  | 15.096301 |
| ENTPD6   | 1.2780875 | 6.3543986 | 10.127579 | 7.10E-21  | 1.75E-19  | 36.659481 |
| YKT6     | 1.278697  | 7.1615207 | 10.495285 | 4.27E-22  | 1.30E-20  | 39.432905 |
| SNHG12   | 1.2801868 | 6.5106538 | 8.5243664 | 8.17E-16  | 8.68E-15  | 25.176284 |
| PLCG1    | 1.2814227 | 5.3251421 | 8.228061  | 6.23E-15  | 5.82E-14  | 23.179218 |
| RHBDF2   | 1.2821124 | 6.9671495 | 7.4351003 | 1.15E-12  | 7.69E-12  | 18.058827 |
| RBCK1    | 1.2822531 | 7.9986955 | 10.616858 | 1.67E-22  | 5.65E-21  | 40.359764 |
| PGGHG    | 1.2824012 | 6.9725282 | 4.9090401 | 1.52E-06  | 4.56E-06  | 4.3497866 |
| POLG2    | 1.2826939 | 6.4912117 | 10.416132 | 7.85E-22  | 2.31E-20  | 38.832039 |
| B4GALNT1 | 1.2833791 | 3.3158695 | 6.1225403 | 2.94E-09  | 1.25E-08  | 10.393875 |
| B4GALT7  | 1.2838796 | 7.140967  | 13.572728 | 6.51E-33  | 1.70E-30  | 64.054852 |
| TOMM40   | 1.2844927 | 6.9846268 | 11.044361 | 5.94E-24  | 2.67E-22  | 43.655466 |
| TMEM9    | 1.2857585 | 8.7530953 | 11.397936 | 3.61E-25  | 1.99E-23  | 46.421243 |
| CTAG2    | 1.2860598 | 2.0887835 | 3.4395713 | 0.0006669 | 0.0013959 | -1.41818  |
| GOLM1    | 1.2873813 | 5.8799789 | 4.831093  | 2.19E-06  | 6.43E-06  | 3.9993785 |
| PLXNC1   | 1.287828  | 3.4215111 | 6.7288162 | 8.94E-11  | 4.58E-10  | 13.799635 |
| GOLGA2P5 | 1.2880406 | 5.5933027 | 7.3983959 | 1.45E-12  | 9.62E-12  | 17.830198 |
| MFS10    | 1.2892497 | 6.2759628 | 6.860805  | 4.05E-11  | 2.17E-10  | 14.572531 |
| BOLA1    | 1.2895542 | 8.5078665 | 11.911411 | 5.85E-27  | 4.40E-25  | 50.495829 |
| CKLF     | 1.2896808 | 6.7732649 | 10.041131 | 1.36E-20  | 3.20E-19  | 36.014253 |
| FDPS     | 1.2898448 | 11.121851 | 7.5072972 | 7.25E-13  | 5.01E-12  | 18.510782 |
| CAPS     | 1.2901879 | 6.2223547 | 7.6011742 | 3.96E-13  | 2.84E-12  | 19.10286  |
| CLN6     | 1.2907169 | 7.1128994 | 11.431598 | 2.76E-25  | 1.56E-23  | 46.686329 |
| NME2     | 1.2911176 | 10.821222 | 7.9742848 | 3.43E-14  | 2.90E-13  | 21.503956 |
| DTNA     | 1.2916189 | 3.2623915 | 7.3249914 | 2.31E-12  | 1.49E-11  | 17.375293 |
| COMMD5   | 1.2920337 | 7.9619489 | 12.104262 | 1.22E-27  | 1.07E-25  | 52.042354 |
| UBE2Q1   | 1.2920414 | 7.5316    | 11.893049 | 6.79E-27  | 5.00E-25  | 50.349021 |
| TRIM65   | 1.292309  | 4.0935931 | 9.9332576 | 3.07E-20  | 6.68E-19  | 35.212897 |
| KNTC1    | 1.2938865 | 4.6723931 | 7.6093351 | 3.76E-13  | 2.70E-12  | 19.154564 |



|           |           |           |           |           |          |           |
|-----------|-----------|-----------|-----------|-----------|----------|-----------|
| TBC1D13   | 1.2938935 | 8.4000944 | 10.229339 | 3.28E-21  | 8.59E-20 | 37.422376 |
| NHP2      | 1.2941855 | 9.1735665 | 12.030124 | 2.24E-27  | 1.83E-25 | 51.446837 |
| TMEM198   | 1.2942601 | 5.0032301 | 7.9487499 | 4.06E-14  | 3.40E-13 | 21.337245 |
| BCAP31    | 1.2946721 | 10.350594 | 11.497953 | 1.63E-25  | 9.53E-24 | 47.209727 |
| FOXD2-AS1 | 1.2949323 | 3.2198753 | 7.5781184 | 4.60E-13  | 3.26E-12 | 18.95699  |
| TLX1      | 1.2958082 | 3.0957681 | 6.5142882 | 3.16E-10  | 1.51E-09 | 12.566989 |
| NDST1     | 1.2964351 | 5.9929802 | 9.0979309 | 1.43E-17  | 1.97E-16 | 29.159978 |
| DVL2      | 1.2968331 | 5.952681  | 10.028729 | 1.50E-20  | 3.48E-19 | 35.921907 |
| FAM3B     | 1.2969945 | 5.9232484 | 3.0808879 | 0.0022592 | 0.004339 | -2.544156 |
| CD248     | 1.297004  | 6.1349607 | 7.0164173 | 1.57E-11  | 8.99E-11 | 15.497637 |
| TBCE      | 1.2974518 | 7.3560914 | 12.766628 | 5.36E-30  | 7.22E-28 | 57.413359 |
| FANCD2    | 1.2978686 | 3.4223743 | 8.1503622 | 1.05E-14  | 9.52E-14 | 22.662786 |
| MPZL1     | 1.2979555 | 6.0114025 | 8.5214484 | 8.34E-16  | 8.83E-15 | 25.156407 |
| CBX1      | 1.2990643 | 6.9554438 | 8.7784718 | 1.39E-16  | 1.64E-15 | 26.922597 |
| TAF6      | 1.2995711 | 7.4924436 | 7.8762019 | 6.57E-14  | 5.31E-13 | 20.865483 |
| LMNB1     | 1.2995775 | 5.7352568 | 6.292041  | 1.13E-09  | 5.09E-09 | 11.32156  |
| MYO19     | 1.2996713 | 6.3014448 | 9.2775349 | 3.90E-18  | 5.93E-17 | 30.437463 |
| SMG9      | 1.2997456 | 5.4798291 | 11.064069 | 5.08E-24  | 2.32E-22 | 43.808708 |
| CSTB      | 1.3013405 | 11.053483 | 10.30294  | 1.87E-21  | 5.14E-20 | 37.976402 |
| TRIM25    | 1.3013762 | 6.1344662 | 9.4259842 | 1.32E-18  | 2.18E-17 | 31.503581 |
| SNX22     | 1.3020904 | 5.214467  | 6.4951501 | 3.53E-10  | 1.67E-09 | 12.458465 |
| HOXD9     | 1.3021845 | 3.3206996 | 6.3168422 | 9.85E-10  | 4.45E-09 | 11.458919 |
| SH3BP5L   | 1.3024105 | 7.5642834 | 11.146188 | 2.66E-24  | 1.27E-22 | 44.448431 |
| CASC9     | 1.3035828 | 2.6356797 | 4.3130232 | 2.20E-05  | 5.68E-05 | 1.7937026 |
| MLEC      | 1.3037599 | 8.1606428 | 10.649848 | 1.29E-22  | 4.48E-21 | 40.612086 |
| ABCC10    | 1.3039566 | 5.1667565 | 9.8000384 | 8.34E-20  | 1.68E-18 | 34.229178 |
| C8orf76   | 1.3042635 | 7.1814983 | 11.380721 | 4.14E-25  | 2.27E-23 | 46.285798 |
| S100A1    | 1.3048038 | 3.9481021 | 4.4999623 | 9.80E-06  | 2.65E-05 | 2.5645622 |
| KLHL12    | 1.3055054 | 6.1823425 | 11.471656 | 2.01E-25  | 1.15E-23 | 47.002168 |
| CD109     | 1.3056162 | 3.7164168 | 6.2874663 | 1.16E-09  | 5.22E-09 | 11.296268 |
| SLC25A39  | 1.3057155 | 9.0424292 | 13.406181 | 2.63E-32  | 6.32E-30 | 62.674501 |
| MCRS1     | 1.3067012 | 7.232687  | 12.834206 | 3.07E-30  | 4.46E-28 | 57.966058 |
| CUEDC1    | 1.307092  | 4.7550218 | 8.4800827 | 1.11E-15  | 1.15E-14 | 24.875084 |
| TUBA1B    | 1.3071969 | 10.788271 | 5.8638343 | 1.21E-08  | 4.77E-08 | 9.0159497 |
| UXS1      | 1.307225  | 6.7096559 | 10.31133  | 1.75E-21  | 4.85E-20 | 38.039673 |
| UFC1      | 1.3074656 | 8.9968355 | 13.044729 | 5.35E-31  | 9.37E-29 | 59.692917 |
| ANAPC7    | 1.308286  | 5.1941925 | 13.086837 | 3.77E-31  | 6.94E-29 | 60.039202 |
| RASL12    | 1.3087087 | 3.8342384 | 9.5310819 | 6.12E-19  | 1.06E-17 | 32.263806 |
| ENGASE    | 1.3087951 | 6.7743744 | 9.9905515 | 2.00E-20  | 4.54E-19 | 35.637988 |
| CDK5RAP3  | 1.3100123 | 9.2354292 | 12.791793 | 4.35E-30  | 5.95E-28 | 57.619084 |
| DDX49     | 1.3114413 | 7.5225856 | 13.854376 | 6.09E-34  | 1.93E-31 | 66.397648 |
| PABPC1    | 1.3114863 | 11.934164 | 7.8357273 | 8.58E-14  | 6.80E-13 | 20.603506 |
| ARL2      | 1.3129062 | 7.4168534 | 7.8441435 | 8.12E-14  | 6.45E-13 | 20.657909 |
| XPO5      | 1.3144009 | 5.6466854 | 10.356048 | 1.24E-21  | 3.53E-20 | 38.377314 |
| CLCN7     | 1.3157766 | 6.7570256 | 8.8809814 | 6.71E-17  | 8.38E-16 | 27.635557 |
| PRKRIP1   | 1.3159465 | 6.3805467 | 12.931679 | 1.37E-30  | 2.15E-28 | 58.764659 |
| GABRD     | 1.3159861 | 3.1956613 | 11.093487 | 4.03E-24  | 1.87E-22 | 44.037662 |
| LPCAT1    | 1.3168945 | 4.2152469 | 6.4616145 | 4.29E-10  | 2.01E-09 | 12.268877 |
| CDKN2B    | 1.3172357 | 3.5198202 | 7.9020246 | 5.54E-14  | 4.53E-13 | 21.033081 |
| SNRPD2    | 1.3173882 | 10.26225  | 10.058346 | 1.20E-20  | 2.85E-19 | 36.142528 |
| STC2      | 1.3174402 | 3.2597348 | 6.5110249 | 3.22E-10  | 1.53E-09 | 12.548467 |

|          |            |            |            |            |            |            |
|----------|------------|------------|------------|------------|------------|------------|
| TRMT1    | 1. 3174547 | 7. 5876067 | 12. 395562 | 1. 14E-28  | 1. 18E-26  | 54. 393659 |
| USF1     | 1. 317967  | 5. 7385946 | 14. 824559 | 1. 63E-37  | 8. 57E-35  | 74. 535391 |
| NARF     | 1. 3183605 | 7. 537625  | 11. 393589 | 3. 74E-25  | 2. 06E-23  | 46. 387034 |
| FBXL6    | 1. 3187189 | 6. 8559829 | 9. 3886584 | 1. 74E-18  | 2. 80E-17  | 31. 234663 |
| DEPDC1   | 1. 3188236 | 2. 8398223 | 7. 6645525 | 2. 63E-13  | 1. 94E-12  | 19. 505368 |
| TMEM79   | 1. 3192786 | 5. 6240949 | 12. 960148 | 1. 08E-30  | 1. 77E-28  | 58. 998221 |
| APOBEC3B | 1. 3200106 | 4. 7963956 | 5. 689913  | 3. 07E-08  | 1. 15E-07  | 8. 1160348 |
| ELOVL1   | 1. 320575  | 7. 6224411 | 11. 310052 | 7. 27E-25  | 3. 81E-23  | 45. 73059  |
| CYHR1    | 1. 3206437 | 7. 6463893 | 12. 082628 | 1. 46E-27  | 1. 24E-25  | 51. 868447 |
| CDCA4    | 1. 3234265 | 3. 6303465 | 9. 0066706 | 2. 75E-17  | 3. 64E-16  | 28. 516192 |
| GPATCH4  | 1. 3243952 | 7. 7166698 | 10. 680801 | 1. 02E-22  | 3. 63E-21  | 40. 849151 |
| SKA1     | 1. 3247345 | 2. 2819993 | 8. 4571889 | 1. 30E-15  | 1. 33E-14  | 24. 719741 |
| ZNF687   | 1. 324789  | 6. 230554  | 8. 6452763 | 3. 53E-16  | 3. 94E-15  | 26. 00344  |
| ASPCR1   | 1. 3251419 | 7. 3559161 | 7. 7357828 | 1. 65E-13  | 1. 25E-12  | 19. 96039  |
| SAE1     | 1. 3256789 | 7. 4590101 | 11. 097741 | 3. 90E-24  | 1. 82E-22  | 44. 070788 |
| TCF3     | 1. 3261889 | 6. 9437453 | 9. 3699979 | 1. 99E-18  | 3. 17E-17  | 31. 100436 |
| LRRC45   | 1. 3265597 | 6. 9279579 | 8. 4900809 | 1. 04E-15  | 1. 08E-14  | 24. 943005 |
| AQP8     | 1. 3274046 | 3. 9179479 | 4. 3037927 | 2. 29E-05  | 5. 89E-05  | 1. 7563837 |
| TMSB10   | 1. 3282717 | 11. 342107 | 5. 6965048 | 2. 97E-08  | 1. 11E-07  | 8. 1497483 |
| UCHL1    | 1. 3282865 | 5. 056766  | 3. 6435209 | 0. 0003178 | 0. 0007009 | -0. 727017 |
| ABCD1    | 1. 3285231 | 5. 800483  | 8. 5328565 | 7. 71E-16  | 8. 20E-15  | 25. 234138 |
| MAVS     | 1. 3288872 | 6. 642014  | 10. 614141 | 1. 71E-22  | 5. 74E-21  | 40. 338993 |
| NOP56    | 1. 3292106 | 8. 6022846 | 9. 7102056 | 1. 63E-19  | 3. 16E-18  | 33. 569614 |
| VPS28    | 1. 3292914 | 10. 63288  | 10. 965494 | 1. 10E-23  | 4. 77E-22  | 43. 043343 |
| CHML     | 1. 3296747 | 4. 4156581 | 7. 3738687 | 1. 70E-12  | 1. 11E-11  | 17. 677851 |
| NEU1     | 1. 3298773 | 7. 4960567 | 10. 275469 | 2. 30E-21  | 6. 27E-20  | 37. 769402 |
| LYPD1    | 1. 3299082 | 3. 4909189 | 5. 5858488 | 5. 30E-08  | 1. 92E-07  | 7. 5879529 |
| TMC03    | 1. 3314332 | 5. 6870651 | 7. 9062752 | 5. 39E-14  | 4. 42E-13  | 21. 060703 |
| NAA10    | 1. 3315016 | 7. 6715056 | 12. 324969 | 2. 02E-28  | 2. 03E-26  | 53. 822224 |
| EFNA3    | 1. 3323015 | 2. 4680276 | 8. 0525979 | 2. 03E-14  | 1. 78E-13  | 22. 017376 |
| ALDOA    | 1. 3330987 | 11. 248464 | 7. 5690958 | 4. 87E-13  | 3. 44E-12  | 18. 899987 |
| ANKZF1   | 1. 3339179 | 6. 6656837 | 13. 075396 | 4. 15E-31  | 7. 48E-29  | 59. 945089 |
| GOLPH3L  | 1. 3342682 | 6. 386852  | 10. 0431   | 1. 34E-20  | 3. 16E-19  | 36. 028925 |
| ATP6AP1  | 1. 3345331 | 9. 1530672 | 12. 981589 | 9. 04E-31  | 1. 52E-28  | 59. 174207 |
| GIT1     | 1. 3361191 | 4. 4669476 | 10. 52999  | 3. 27E-22  | 1. 02E-20  | 39. 697    |
| SMYD2    | 1. 33613   | 8. 7885308 | 7. 7686984 | 1. 33E-13  | 1. 03E-12  | 20. 171594 |
| CDC25B   | 1. 3374234 | 7. 1105613 | 7. 5625199 | 5. 08E-13  | 3. 58E-12  | 18. 85847  |
| SFRP4    | 1. 3374363 | 3. 9193906 | 5. 6148967 | 4. 55E-08  | 1. 67E-07  | 7. 7345699 |
| C15orf48 | 1. 3376112 | 5. 6702594 | 3. 9763512 | 8. 82E-05  | 0. 00021   | 0. 4785205 |
| ZNF580   | 1. 3378454 | 6. 4705074 | 10. 510329 | 3. 80E-22  | 1. 17E-20  | 39. 547336 |
| RAP2A    | 1. 3383837 | 6. 3538905 | 7. 7390129 | 1. 62E-13  | 1. 23E-12  | 19. 98109  |
| SEMA6C   | 1. 3391663 | 5. 4543206 | 7. 9013095 | 5. 57E-14  | 4. 55E-13  | 21. 028435 |
| PUF60    | 1. 3399615 | 9. 2732019 | 12. 014529 | 2. 54E-27  | 2. 06E-25  | 51. 321723 |
| TNFRSF25 | 1. 3405438 | 6. 836587  | 7. 8950805 | 5. 80E-14  | 4. 72E-13  | 20. 987976 |
| PDCD5    | 1. 3429394 | 8. 4660204 | 12. 582385 | 2. 45E-29  | 2. 91E-27  | 55. 910731 |
| PGP      | 1. 3429507 | 5. 369227  | 11. 214522 | 1. 55E-24  | 7. 68E-23  | 44. 982215 |
| GNPAT    | 1. 343193  | 8. 5178362 | 11. 551144 | 1. 06E-25  | 6. 39E-24  | 47. 630114 |
| CKAP2L   | 1. 3443057 | 3. 2011201 | 8. 1137367 | 1. 35E-14  | 1. 21E-13  | 22. 420418 |
| NPLOC4   | 1. 3444244 | 6. 6553457 | 11. 791072 | 1. 55E-26  | 1. 07E-24  | 49. 535123 |
| EME2     | 1. 3448327 | 4. 5111906 | 8. 9127103 | 5. 36E-17  | 6. 81E-16  | 27. 857197 |
| PCAT6    | 1. 3454555 | 4. 1053005 | 8. 6139297 | 4. 39E-16  | 4. 83E-15  | 25. 788329 |

|            |           |           |           |           |           |           |
|------------|-----------|-----------|-----------|-----------|-----------|-----------|
| UQCC2      | 1.3463867 | 8.6496471 | 11.915072 | 5.68E-27  | 4.29E-25  | 50.525111 |
| KISS1      | 1.3467067 | 4.4187209 | 6.5976116 | 1.94E-10  | 9.51E-10  | 13.042244 |
| SLC41A3    | 1.347843  | 8.112052  | 11.59216  | 7.65E-26  | 4.78E-24  | 47.954767 |
| KLF13      | 1.3484344 | 6.6214592 | 8.3235121 | 3.25E-15  | 3.17E-14  | 23.817812 |
| ATP6V1C1   | 1.3484936 | 6.2135262 | 9.4371539 | 1.22E-18  | 2.01E-17  | 31.584164 |
| SPARC      | 1.3493088 | 10.557855 | 6.7139703 | 9.76E-11  | 4.97E-10  | 13.713386 |
| SAMD1      | 1.3522031 | 5.6354904 | 11.424184 | 2.93E-25  | 1.64E-23  | 46.627918 |
| TUFT1      | 1.352581  | 4.9413372 | 8.4071413 | 1.83E-15  | 1.84E-14  | 24.381038 |
| SNRNP70    | 1.3528369 | 9.4168114 | 12.316559 | 2.17E-28  | 2.16E-26  | 53.75421  |
| CHKA       | 1.3529698 | 6.5059477 | 9.2516192 | 4.71E-18  | 7.03E-17  | 30.252284 |
| PRPF3      | 1.3533797 | 6.0203951 | 10.829355 | 3.20E-23  | 1.26E-21  | 41.991021 |
| KNSTRN     | 1.3538941 | 6.66795   | 9.7257236 | 1.45E-19  | 2.84E-18  | 33.683329 |
| SOX12      | 1.3539896 | 4.3733407 | 7.4385527 | 1.12E-12  | 7.53E-12  | 18.080372 |
| ILF3       | 1.3547231 | 7.5170809 | 10.537527 | 3.08E-22  | 9.66E-21  | 39.754413 |
| CDKN2AIPNI | 1.3549817 | 6.4148152 | 12.822595 | 3.37E-30  | 4.80E-28  | 57.871035 |
| LIMK1      | 1.3553515 | 4.9959223 | 7.1424631 | 7.23E-12  | 4.35E-11  | 16.257772 |
| SIRT7      | 1.3556107 | 6.9284128 | 11.008489 | 7.87E-24  | 3.48E-22  | 43.376823 |
| NDRG3      | 1.3556475 | 5.695509  | 9.6972111 | 1.79E-19  | 3.46E-18  | 33.474463 |
| RAB24      | 1.356746  | 7.1181724 | 11.987984 | 3.15E-27  | 2.50E-25  | 51.10889  |
| PDGFRB     | 1.3571    | 7.3963806 | 6.7495663 | 7.90E-11  | 4.07E-10  | 13.920418 |
| JMJD4      | 1.3579616 | 6.5468859 | 13.732527 | 1.70E-33  | 5.03E-31  | 65.382828 |
| LINC01138  | 1.3579727 | 4.8150059 | 9.5969448 | 3.76E-19  | 6.73E-18  | 32.742479 |
| RNF213     | 1.358897  | 7.984977  | 9.0275343 | 2.36E-17  | 3.15E-16  | 28.663051 |
| IP6K1      | 1.3592911 | 5.2794842 | 12.143543 | 8.90E-28  | 7.95E-26  | 52.358367 |
| CDK5       | 1.3596102 | 7.5679549 | 12.105156 | 1.22E-27  | 1.07E-25  | 52.049544 |
| SNRPC      | 1.3624822 | 8.1833544 | 13.227813 | 1.17E-31  | 2.39E-29  | 61.200633 |
| DUSP12     | 1.362606  | 7.4885134 | 12.030524 | 2.23E-27  | 1.83E-25  | 51.450043 |
| CREB3L4    | 1.3630215 | 7.3688226 | 10.787668 | 4.43E-23  | 1.69E-21  | 41.669909 |
| POLA2      | 1.3637686 | 5.1067152 | 10.912722 | 1.67E-23  | 7.00E-22  | 42.634775 |
| TSPAN17    | 1.3640463 | 6.3661034 | 11.917716 | 5.56E-27  | 4.25E-25  | 50.546256 |
| STC1       | 1.364052  | 2.8108032 | 6.4633073 | 4.25E-10  | 1.99E-09  | 12.278429 |
| SHISA4     | 1.3644596 | 8.5610386 | 5.9696349 | 6.84E-09  | 2.78E-08  | 9.5738479 |
| SF3A2      | 1.3653829 | 9.7780305 | 10.133717 | 6.77E-21  | 1.68E-19  | 36.705392 |
| GSTA4      | 1.3657592 | 7.5170074 | 7.1870622 | 5.48E-12  | 3.35E-11  | 16.529012 |
| GTPBP2     | 1.3661484 | 5.8971268 | 8.7906135 | 1.27E-16  | 1.52E-15  | 27.006792 |
| MVD        | 1.3664966 | 7.5987245 | 8.2494879 | 5.39E-15  | 5.09E-14  | 23.322173 |
| TMEM184B   | 1.3666054 | 8.3159167 | 9.5273949 | 6.29E-19  | 1.09E-17  | 32.237061 |
| RPL8       | 1.3675342 | 13.238672 | 8.588202  | 5.25E-16  | 5.71E-15  | 25.612123 |
| NSUN5      | 1.3679503 | 8.1863332 | 14.388508 | 6.66E-36  | 2.67E-33  | 70.866392 |
| SHARPIN    | 1.368481  | 8.0323384 | 11.628395 | 5.72E-26  | 3.65E-24  | 48.241927 |
| HGS        | 1.3690595 | 7.8877324 | 7.6264465 | 3.37E-13  | 2.43E-12  | 19.263094 |
| ARID3A     | 1.3709057 | 4.9111244 | 5.9017968 | 9.89E-09  | 3.94E-08  | 9.2152279 |
| HGH1       | 1.3713357 | 7.0441492 | 9.735204  | 1.35E-19  | 2.66E-18  | 33.752845 |
| TMEM132A   | 1.3715191 | 5.3183404 | 5.8242209 | 1.50E-08  | 5.83E-08  | 8.809089  |
| PYCR2      | 1.3728764 | 8.3254885 | 12.955702 | 1.12E-30  | 1.82E-28  | 58.961738 |
| SPC25      | 1.3733562 | 4.2537875 | 9.2901955 | 3.56E-18  | 5.45E-17  | 30.528031 |
| MAD2L1     | 1.3738923 | 4.5177739 | 8.440506  | 1.46E-15  | 1.48E-14  | 24.606702 |
| COL5A3     | 1.3757584 | 5.3829854 | 5.2158572 | 3.46E-07  | 1.13E-06  | 5.7748472 |
| ACBD6      | 1.3765953 | 7.1017279 | 12.303537 | 2.41E-28  | 2.38E-26  | 53.64894  |
| NPEPL1     | 1.377247  | 7.415309  | 10.824668 | 3.32E-23  | 1.30E-21  | 41.954893 |
| DKK1       | 1.3772565 | 2.6101025 | 3.6009007 | 0.0003721 | 0.0008108 | -0.874467 |

|           |           |           |           |           |           |           |
|-----------|-----------|-----------|-----------|-----------|-----------|-----------|
| SDF2L1    | 1.3772838 | 10.973515 | 10.193489 | 4.30E-21  | 1.10E-19  | 37.1532   |
| UBQLN4    | 1.3773073 | 5.1180213 | 10.236121 | 3.11E-21  | 8.25E-20  | 37.47335  |
| CCDC137   | 1.3781476 | 7.0282278 | 11.998142 | 2.90E-27  | 2.33E-25  | 51.190312 |
| BCL9      | 1.3784418 | 3.7202183 | 8.1456979 | 1.09E-14  | 9.80E-14  | 22.631882 |
| PLXDC1    | 1.3810814 | 4.1521425 | 8.0347108 | 2.29E-14  | 1.99E-13  | 21.899826 |
| TEAD2     | 1.3812318 | 4.4670433 | 6.1304726 | 2.81E-09  | 1.20E-08  | 10.436854 |
| CPE       | 1.3813037 | 7.7350417 | 5.4552623 | 1.04E-07  | 3.64E-07  | 6.9364415 |
| CCT6A     | 1.382294  | 9.3004386 | 11.483268 | 1.83E-25  | 1.06E-23  | 47.093795 |
| CBX8      | 1.3831935 | 4.8551716 | 11.148105 | 2.62E-24  | 1.25E-22  | 44.463384 |
| OXLD1     | 1.3833457 | 7.7182607 | 12.462753 | 6.55E-29  | 7.29E-27  | 54.938488 |
| UHRF1     | 1.3853664 | 4.6236924 | 7.3778294 | 1.65E-12  | 1.09E-11  | 17.702428 |
| MRPL53    | 1.3858711 | 7.924013  | 12.828831 | 3.21E-30  | 4.59E-28  | 57.922067 |
| PSKH1     | 1.3859711 | 7.4977456 | 10.900903 | 1.83E-23  | 7.63E-22  | 42.54338  |
| ORC1      | 1.3862324 | 3.0144355 | 8.377487  | 2.25E-15  | 2.24E-14  | 24.180928 |
| TCOF1     | 1.3865418 | 6.3837969 | 11.497921 | 1.63E-25  | 9.53E-24  | 47.209478 |
| DCAF13    | 1.3868628 | 6.2721114 | 9.8555955 | 5.50E-20  | 1.15E-18  | 34.638617 |
| MAPK11    | 1.3870861 | 6.3457626 | 8.0203446 | 2.52E-14  | 2.18E-13  | 21.805535 |
| CKAP4     | 1.3893596 | 7.9906646 | 8.4638449 | 1.24E-15  | 1.28E-14  | 24.764878 |
| RUSC1-AS1 | 1.3896268 | 3.6735744 | 9.5166663 | 6.80E-19  | 1.18E-17  | 32.159267 |
| STX10     | 1.3899123 | 8.0531293 | 13.645109 | 3.54E-33  | 9.84E-31  | 64.65594  |
| DLL4      | 1.3911108 | 3.5147552 | 9.1339332 | 1.10E-17  | 1.55E-16  | 29.414948 |
| SERPINI1  | 1.3916027 | 3.8231618 | 6.5501371 | 2.56E-10  | 1.24E-09  | 12.770911 |
| SHC1      | 1.3917377 | 7.7918145 | 10.185667 | 4.57E-21  | 1.16E-19  | 37.09452  |
| KMT5C     | 1.391904  | 4.6093181 | 11.067303 | 4.96E-24  | 2.28E-22  | 43.833862 |
| BAX       | 1.392069  | 8.37837   | 11.1903   | 1.88E-24  | 9.18E-23  | 44.792854 |
| PSRC1     | 1.3921858 | 4.7040396 | 8.4137008 | 1.75E-15  | 1.77E-14  | 24.425361 |
| DHX34     | 1.3941897 | 3.5756661 | 12.109426 | 1.17E-27  | 1.03E-25  | 52.083881 |
| LIG1      | 1.3947315 | 7.3374267 | 9.6492973 | 2.56E-19  | 4.78E-18  | 33.124184 |
| WDR62     | 1.3953255 | 2.8965959 | 8.4312109 | 1.56E-15  | 1.58E-14  | 24.543779 |
| RNF157    | 1.3955276 | 3.151996  | 6.4949913 | 3.54E-10  | 1.67E-09  | 12.457566 |
| RHN01     | 1.3963716 | 4.8598089 | 9.9484619 | 2.74E-20  | 6.04E-19  | 35.325587 |
| NABP2     | 1.3968356 | 6.2397139 | 12.870171 | 2.28E-30  | 3.34E-28  | 58.260526 |
| TTC13     | 1.3975596 | 4.994974  | 11.694981 | 3.35E-26  | 2.21E-24  | 48.770473 |
| P3H4      | 1.3982715 | 5.295965  | 7.4801619 | 8.62E-13  | 5.87E-12  | 18.340567 |
| MRPS21    | 1.3983536 | 9.7739483 | 13.059309 | 4.74E-31  | 8.38E-29  | 59.812784 |
| TDRKH     | 1.3999884 | 4.346464  | 9.2608485 | 4.41E-18  | 6.62E-17  | 30.318199 |
| SMARCA4   | 1.4004873 | 7.2400412 | 10.628006 | 1.53E-22  | 5.25E-21  | 40.444993 |
| KLC2      | 1.4006711 | 5.0597067 | 9.2199882 | 5.92E-18  | 8.69E-17  | 30.026651 |
| TAGLN2    | 1.400812  | 9.4899664 | 9.1360251 | 1.09E-17  | 1.52E-16  | 29.42978  |
| COL1A1    | 1.4012163 | 8.2253884 | 3.7919508 | 0.0001814 | 0.0004144 | -0.201178 |
| CDH13     | 1.4025426 | 4.4410984 | 11.6026   | 7.04E-26  | 4.47E-24  | 48.03747  |
| COG2      | 1.4027959 | 6.4127353 | 12.002488 | 2.80E-27  | 2.26E-25  | 51.225156 |
| CSAG1     | 1.4038263 | 4.6757097 | 3.5303785 | 0.0004815 | 0.0010309 | -1.114957 |
| PCNX3     | 1.4045096 | 5.0376358 | 12.733319 | 7.06E-30  | 9.37E-28  | 57.141244 |
| FBLIM1    | 1.4054108 | 5.1639901 | 6.3262846 | 9.33E-10  | 4.23E-09  | 11.511324 |
| SBF1      | 1.405479  | 6.2482298 | 8.8880362 | 6.39E-17  | 8.01E-16  | 27.684798 |
| PPM1F     | 1.4065813 | 4.8566989 | 12.92334  | 1.47E-30  | 2.28E-28  | 58.696278 |
| WDR76     | 1.4070931 | 2.9582356 | 8.2806296 | 4.36E-15  | 4.17E-14  | 23.530352 |
| CRNDE     | 1.4077363 | 4.8043063 | 7.648745  | 2.91E-13  | 2.13E-12  | 19.404768 |
| RBM24     | 1.4083227 | 2.9622452 | 6.5913566 | 2.01E-10  | 9.82E-10  | 13.006411 |
| ZC3H3     | 1.408561  | 4.9071203 | 10.802092 | 3.96E-23  | 1.53E-21  | 41.780954 |

|          |           |           |           |           |           |           |
|----------|-----------|-----------|-----------|-----------|-----------|-----------|
| CLK2     | 1.409233  | 6.0068797 | 10.751892 | 5.86E-23  | 2.21E-21  | 41.394747 |
| PRCC     | 1.4098603 | 6.7136564 | 13.477512 | 1.45E-32  | 3.57E-30  | 63.265219 |
| ATP1B3   | 1.4101363 | 8.1194263 | 6.8345025 | 4.75E-11  | 2.52E-10  | 14.41764  |
| POLR2K   | 1.4102841 | 9.0948922 | 13.176657 | 1.78E-31  | 3.54E-29  | 60.778824 |
| LSM4     | 1.410819  | 9.1971991 | 12.583527 | 2.43E-29  | 2.90E-27  | 55.920027 |
| PKN3     | 1.4113923 | 4.4858932 | 9.1466708 | 1.01E-17  | 1.42E-16  | 29.505291 |
| JAG2     | 1.4115675 | 4.5478631 | 8.701895  | 2.37E-16  | 2.71E-15  | 26.393146 |
| ZNF581   | 1.4116658 | 5.8096145 | 10.984913 | 9.47E-24  | 4.16E-22  | 43.193898 |
| BSG      | 1.4128884 | 9.5710114 | 10.984419 | 9.51E-24  | 4.17E-22  | 43.190063 |
| LEF1     | 1.4158705 | 3.7812987 | 6.2636613 | 1.33E-09  | 5.92E-09  | 11.164886 |
| UNC119B  | 1.416293  | 6.2904312 | 8.8204863 | 1.03E-16  | 1.25E-15  | 27.214231 |
| MFGE8    | 1.417469  | 4.553102  | 7.8392245 | 8.39E-14  | 6.66E-13  | 20.626108 |
| KRT23    | 1.4184719 | 6.220045  | 3.3554596 | 0.0008964 | 0.0018382 | -1.69254  |
| MARK4    | 1.4192311 | 6.2733783 | 11.664616 | 4.28E-26  | 2.77E-24  | 48.529303 |
| FASN     | 1.420883  | 7.7833077 | 5.8946558 | 1.03E-08  | 4.08E-08  | 9.1776648 |
| MYO15B   | 1.4210447 | 5.4574277 | 7.5842606 | 4.42E-13  | 3.14E-12  | 18.995821 |
| PCBP4    | 1.4228631 | 7.7692142 | 10.631818 | 1.49E-22  | 5.10E-21  | 40.474143 |
| LMNA     | 1.42297   | 10.337133 | 12.798078 | 4.13E-30  | 5.70E-28  | 57.670478 |
| ADRA2C   | 1.4232812 | 5.2180037 | 5.1520806 | 4.73E-07  | 1.52E-06  | 5.472681  |
| PFDN6    | 1.4236491 | 7.8680364 | 12.79792  | 4.14E-30  | 5.70E-28  | 57.669183 |
| TFRC     | 1.4239464 | 7.5676446 | 7.7884563 | 1.17E-13  | 9.10E-13  | 20.298655 |
| MMP14    | 1.4244945 | 6.4767719 | 6.3180731 | 9.78E-10  | 4.42E-09  | 11.465747 |
| SERPINH1 | 1.425473  | 7.290358  | 7.8345263 | 8.65E-14  | 6.85E-13  | 20.595746 |
| CCDC28B  | 1.4264837 | 4.6563341 | 7.8455812 | 8.04E-14  | 6.40E-13  | 20.667206 |
| CTSA     | 1.4269635 | 10.062487 | 10.892548 | 1.95E-23  | 8.03E-22  | 42.478802 |
| MNS1     | 1.4282058 | 4.6936317 | 5.4418818 | 1.11E-07  | 3.89E-07  | 6.8703925 |
| IGSF3    | 1.4293262 | 3.4795407 | 6.5665124 | 2.33E-10  | 1.13E-09  | 12.864337 |
| DNMT1    | 1.4303013 | 6.0946378 | 7.8878051 | 6.09E-14  | 4.94E-13  | 20.940747 |
| PSMG3    | 1.4306747 | 7.5419425 | 11.903493 | 6.24E-27  | 4.65E-25  | 50.432517 |
| IDUA     | 1.4310317 | 5.6529647 | 9.7903233 | 8.96E-20  | 1.81E-18  | 34.1577   |
| KIF11    | 1.4310713 | 3.6759946 | 8.3148124 | 3.45E-15  | 3.35E-14  | 23.75942  |
| PKN1     | 1.4409045 | 7.1190794 | 8.5114667 | 8.94E-16  | 9.40E-15  | 25.088447 |
| PCNA     | 1.4444647 | 8.7969327 | 9.5782295 | 4.32E-19  | 7.65E-18  | 32.606287 |
| IGF2BP1  | 1.4445492 | 2.8588478 | 5.6051547 | 4.79E-08  | 1.75E-07  | 7.6853297 |
| ADCY6    | 1.4448567 | 6.0631198 | 10.335363 | 1.46E-21  | 4.09E-20  | 38.221054 |
| RRS1     | 1.4451669 | 7.4923063 | 8.2625012 | 4.93E-15  | 4.69E-14  | 23.409106 |
| RBM3     | 1.4462963 | 8.4584316 | 10.847    | 2.79E-23  | 1.12E-21  | 42.127102 |
| TESC     | 1.4468298 | 7.8874082 | 3.7862335 | 0.0001854 | 0.0004229 | -0.221785 |
| PPOX     | 1.4482048 | 6.2374913 | 15.228073 | 5.22E-39  | 2.94E-36  | 77.943857 |
| WFS1     | 1.4482999 | 6.9346345 | 11.124837 | 3.15E-24  | 1.49E-22  | 44.28192  |
| PLA2G6   | 1.4487878 | 6.0953002 | 9.0796039 | 1.63E-17  | 2.23E-16  | 29.0304   |
| MTMR11   | 1.4491934 | 5.0290008 | 6.7825285 | 6.48E-11  | 3.38E-10  | 14.112844 |
| CABYR    | 1.4505637 | 3.8393652 | 5.0776726 | 6.79E-07  | 2.14E-06  | 5.1240658 |
| C12orf75 | 1.4516844 | 5.201203  | 4.6648216 | 4.70E-06  | 1.32E-05  | 3.2679459 |
| RPL22L1  | 1.4520651 | 9.1152381 | 6.8412968 | 4.56E-11  | 2.43E-10  | 14.457609 |
| TAZ      | 1.4535078 | 6.6366189 | 14.698334 | 4.79E-37  | 2.33E-34  | 73.471636 |
| AP5Z1    | 1.4537027 | 4.942875  | 13.237153 | 1.08E-31  | 2.26E-29  | 61.277694 |
| DBN1     | 1.4538648 | 5.5975053 | 6.0772707 | 3.78E-09  | 1.59E-08  | 10.149417 |
| SUCO     | 1.4540058 | 7.2829837 | 10.276341 | 2.29E-21  | 6.24E-20  | 37.775962 |
| ZFP41    | 1.4543119 | 4.1034842 | 11.551567 | 1.06E-25  | 6.39E-24  | 47.633461 |
| UBAP2L   | 1.4547396 | 6.0364242 | 10.360215 | 1.21E-21  | 3.43E-20  | 38.408814 |

|          |           |           |           |           |           |           |
|----------|-----------|-----------|-----------|-----------|-----------|-----------|
| PIGU     | 1.4548897 | 5.3151608 | 13.165031 | 1.97E-31  | 3.86E-29  | 60.683021 |
| ARHGEF11 | 1.4553582 | 5.1963673 | 9.1391868 | 1.06E-17  | 1.50E-16  | 29.452201 |
| MROH1    | 1.4571385 | 4.0508424 | 10.298424 | 1.93E-21  | 5.30E-20  | 37.942356 |
| CNIH4    | 1.4574376 | 8.0554082 | 12.585193 | 2.39E-29  | 2.88E-27  | 55.933586 |
| CIART    | 1.4604236 | 5.0965394 | 7.1333263 | 7.65E-12  | 4.58E-11  | 16.20235  |
| LMNB2    | 1.460785  | 5.365176  | 8.6028951 | 4.74E-16  | 5.20E-15  | 25.712716 |
| LAGE3    | 1.4613648 | 9.1429834 | 10.715638 | 7.77E-23  | 2.84E-21  | 41.116315 |
| CENPW    | 1.4615867 | 5.1387144 | 9.3344243 | 2.58E-18  | 4.04E-17  | 30.844948 |
| KIAA0100 | 1.4626194 | 8.0776765 | 10.314804 | 1.71E-21  | 4.75E-20  | 38.065883 |
| TSEN54   | 1.4633768 | 8.0929311 | 11.796664 | 1.48E-26  | 1.03E-24  | 49.579691 |
| CSPG4    | 1.4656915 | 3.8150484 | 10.061608 | 1.17E-20  | 2.79E-19  | 36.166847 |
| DENND4B  | 1.4668733 | 7.0863884 | 10.766916 | 5.21E-23  | 1.98E-21  | 41.510253 |
| USP21    | 1.4676436 | 5.0461694 | 11.284037 | 8.94E-25  | 4.66E-23  | 45.526542 |
| NME1     | 1.4682644 | 9.9102169 | 10.896882 | 1.89E-23  | 7.80E-22  | 42.512297 |
| CYP7A1   | 1.4711986 | 7.2430872 | 3.2418164 | 0.0013242 | 0.0026447 | -2.053224 |
| SNHG6    | 1.4714684 | 5.5834485 | 8.3385635 | 2.94E-15  | 2.87E-14  | 23.918925 |
| CD24     | 1.4721422 | 8.0821911 | 3.4537004 | 0.0006343 | 0.0013304 | -1.371479 |
| CAD      | 1.4723913 | 6.5675124 | 9.8180654 | 7.29E-20  | 1.48E-18  | 34.361904 |
| STIP1    | 1.4735938 | 7.4936043 | 11.936997 | 4.76E-27  | 3.67E-25  | 50.700531 |
| ARHGEF39 | 1.4740117 | 3.3926359 | 10.639476 | 1.40E-22  | 4.83E-21  | 40.53272  |
| CLN3     | 1.4740545 | 6.9053214 | 13.707514 | 2.10E-33  | 6.11E-31  | 65.174745 |
| CEP55    | 1.4751569 | 4.0815621 | 7.7397244 | 1.61E-13  | 1.23E-12  | 19.98565  |
| SPIRE2   | 1.4796195 | 5.1966695 | 10.766938 | 5.21E-23  | 1.98E-21  | 41.510423 |
| HSP90AB1 | 1.4799923 | 10.062045 | 10.429421 | 7.09E-22  | 2.10E-20  | 38.932771 |
| BLVRA    | 1.4818283 | 8.4913506 | 6.9982959 | 1.76E-11  | 9.96E-11  | 15.389143 |
| SOWAHA   | 1.4822825 | 5.2195375 | 7.0792086 | 1.07E-11  | 6.28E-11  | 15.875111 |
| SPAG5    | 1.4825148 | 7.1388139 | 7.6464196 | 2.96E-13  | 2.16E-12  | 19.38998  |
| PITX1    | 1.4833183 | 3.3657585 | 4.9972998 | 1.00E-06  | 3.08E-06  | 4.7522841 |
| COCH     | 1.4847276 | 3.3111722 | 5.7811849 | 1.89E-08  | 7.28E-08  | 8.5856149 |
| ZNF517   | 1.4853356 | 3.0628092 | 11.667063 | 4.20E-26  | 2.72E-24  | 48.548735 |
| TUBG1    | 1.4857496 | 6.722151  | 10.500323 | 4.11E-22  | 1.25E-20  | 39.471221 |
| DNAJB11  | 1.4865009 | 9.6779491 | 15.300924 | 2.80E-39  | 1.68E-36  | 78.560369 |
| OIP5     | 1.4878729 | 5.0657183 | 8.3233967 | 3.26E-15  | 3.17E-14  | 23.817037 |
| FLAD1    | 1.4884319 | 6.975079  | 15.455011 | 7.48E-40  | 4.82E-37  | 79.865333 |
| PRIM1    | 1.4906761 | 5.9491139 | 8.7929622 | 1.25E-16  | 1.50E-15  | 27.023087 |
| MAFG     | 1.4907474 | 7.0046554 | 9.2492083 | 4.79E-18  | 7.14E-17  | 30.235071 |
| RAD51AP1 | 1.4915589 | 4.0670181 | 7.9816441 | 3.27E-14  | 2.77E-13  | 21.552067 |
| PYCR1    | 1.4920498 | 5.7614351 | 4.1465966 | 4.42E-05  | 0.0001096 | 1.1317008 |
| SPON2    | 1.4923974 | 11.433191 | 7.6868942 | 2.27E-13  | 1.69E-12  | 19.647788 |
| POLD1    | 1.4925753 | 6.73023   | 10.560384 | 2.59E-22  | 8.29E-21  | 39.928618 |
| ARL16    | 1.4931786 | 7.655582  | 12.062611 | 1.72E-27  | 1.44E-25  | 51.707641 |
| SLC52A2  | 1.4937923 | 7.0465698 | 9.4311873 | 1.27E-18  | 2.10E-17  | 31.541113 |
| TRAF2    | 1.493903  | 7.0631211 | 11.939953 | 4.65E-27  | 3.61E-25  | 50.724184 |
| TXNRD1   | 1.4950687 | 6.7145012 | 6.5424572 | 2.68E-10  | 1.29E-09  | 12.727155 |
| DCAF4L2  | 1.4973897 | 3.1548607 | 4.0616306 | 6.26E-05  | 0.0001519 | 0.8026553 |
| MAPK8IP2 | 1.498395  | 4.2043981 | 6.7939438 | 6.06E-11  | 3.17E-10  | 14.179643 |
| CACYBP   | 1.5011328 | 7.0801609 | 12.052501 | 1.87E-27  | 1.56E-25  | 51.62645  |
| XRCC3    | 1.5041107 | 4.8026914 | 10.935219 | 1.40E-23  | 5.98E-22  | 42.808846 |
| CUL7     | 1.5048949 | 5.8580307 | 10.973693 | 1.03E-23  | 4.51E-22  | 43.106896 |
| GLA      | 1.5049106 | 8.3797459 | 10.538903 | 3.05E-22  | 9.59E-21  | 39.764895 |
| LAPTM4B  | 1.506193  | 8.2104169 | 5.7886921 | 1.82E-08  | 7.00E-08  | 8.6245026 |

|            |            |            |            |            |            |            |
|------------|------------|------------|------------|------------|------------|------------|
| PVT1       | 1. 5076048 | 5. 3028266 | 7. 1587664 | 6. 54E-12  | 3. 95E-11  | 16. 356787 |
| HOXA13     | 1. 5077923 | 2. 742407  | 6. 6380913 | 1. 53E-10  | 7. 59E-10  | 13. 274745 |
| TSPAN8     | 1. 5081449 | 8. 7967644 | 3. 7227192 | 0. 0002362 | 0. 0005307 | -0. 448819 |
| PPP1R35    | 1. 5097098 | 8. 9858871 | 13. 603688 | 5. 02E-33  | 1. 33E-30  | 64. 311875 |
| ACLY       | 1. 5138922 | 7. 1319637 | 9. 8657851 | 5. 10E-20  | 1. 07E-18  | 34. 713837 |
| PPP1R16A   | 1. 51512   | 9. 2755875 | 11. 150465 | 2. 57E-24  | 1. 23E-22  | 44. 481801 |
| ILF2       | 1. 5167617 | 9. 8359861 | 12. 801199 | 4. 03E-30  | 5. 63E-28  | 57. 696007 |
| C8orf33    | 1. 5176781 | 6. 3440839 | 11. 741089 | 2. 31E-26  | 1. 55E-24  | 49. 137101 |
| MPZ        | 1. 5194705 | 2. 8212941 | 4. 9158253 | 1. 47E-06  | 4. 42E-06  | 4. 380514  |
| GLMP       | 1. 5207839 | 9. 1791023 | 10. 312843 | 1. 73E-21  | 4. 80E-20  | 38. 051088 |
| RFXANK     | 1. 522565  | 8. 0905209 | 13. 359149 | 3. 89E-32  | 8. 69E-30  | 62. 285407 |
| TRIM16L    | 1. 5238362 | 5. 2898439 | 5. 4893437 | 8. 72E-08  | 3. 08E-07  | 7. 1052708 |
| DSCC1      | 1. 5238464 | 3. 8933554 | 10. 842699 | 2. 89E-23  | 1. 15E-21  | 42. 093927 |
| FAM50A     | 1. 5244677 | 9. 0741844 | 11. 364321 | 4. 72E-25  | 2. 54E-23  | 46. 15683  |
| CENPL      | 1. 5280164 | 2. 6164065 | 10. 419547 | 7. 65E-22  | 2. 26E-20  | 38. 857918 |
| PDLIM7     | 1. 5287815 | 4. 9317365 | 9. 3256887 | 2. 75E-18  | 4. 26E-17  | 30. 782289 |
| C19orf48   | 1. 5299395 | 7. 7295805 | 9. 7322477 | 1. 38E-19  | 2. 71E-18  | 33. 731164 |
| LAMA4      | 1. 5305808 | 5. 6306473 | 10. 104767 | 8. 43E-21  | 2. 06E-19  | 36. 488961 |
| KIF18B     | 1. 5306665 | 3. 0997475 | 8. 136095  | 1. 16E-14  | 1. 04E-13  | 22. 568292 |
| THEM5      | 1. 5316023 | 7. 562657  | 9. 3267825 | 2. 73E-18  | 4. 24E-17  | 30. 790133 |
| RUSC1      | 1. 5316148 | 6. 0374969 | 10. 573547 | 2. 34E-22  | 7. 55E-21  | 40. 029021 |
| FAM222A    | 1. 5320237 | 5. 5198462 | 8. 4311173 | 1. 56E-15  | 1. 58E-14  | 24. 543146 |
| PAQR4      | 1. 5320314 | 4. 8380073 | 7. 6429973 | 3. 02E-13  | 2. 20E-12  | 19. 368224 |
| GINS2      | 1. 5361734 | 5. 6569736 | 8. 7314894 | 1. 93E-16  | 2. 23E-15  | 26. 597439 |
| SEMA3F     | 1. 5362031 | 4. 3888437 | 13. 188891 | 1. 61E-31  | 3. 27E-29  | 60. 879662 |
| TRIM11     | 1. 5390576 | 7. 171698  | 12. 509019 | 4. 48E-29  | 5. 18E-27  | 55. 314156 |
| GPSM1      | 1. 5403536 | 4. 9284932 | 6. 9601865 | 2. 22E-11  | 1. 24E-10  | 15. 161633 |
| PLA2G4C    | 1. 543716  | 5. 9168841 | 8. 4729686 | 1. 17E-15  | 1. 20E-14  | 24. 826785 |
| TTC39A     | 1. 5451079 | 3. 2942764 | 6. 1653874 | 2. 32E-09  | 1. 00E-08  | 10. 626542 |
| MMP9       | 1. 5464688 | 6. 7687292 | 4. 8666514 | 1. 85E-06  | 5. 50E-06  | 4. 1586386 |
| TSPEAR-AS2 | 1. 5475389 | 4. 2781704 | 5. 8171571 | 1. 56E-08  | 6. 04E-08  | 8. 7723187 |
| MINCR      | 1. 5478851 | 6. 8446693 | 9. 3591121 | 2. 16E-18  | 3. 41E-17  | 31. 022199 |
| CCDC34     | 1. 5479069 | 4. 1581935 | 9. 416998  | 1. 41E-18  | 2. 31E-17  | 31. 438787 |
| PSMD4      | 1. 5498885 | 11. 021121 | 14. 16017  | 4. 61E-35  | 1. 70E-32  | 68. 952233 |
| CHAF1A     | 1. 5504031 | 6. 1253187 | 10. 620632 | 1. 62E-22  | 5. 50E-21  | 40. 388608 |
| TLCD1      | 1. 5521265 | 6. 1027766 | 10. 191646 | 4. 36E-21  | 1. 11E-19  | 37. 139373 |
| FANCG      | 1. 5535417 | 6. 5288809 | 10. 430452 | 7. 03E-22  | 2. 09E-20  | 38. 940587 |
| CHTF18     | 1. 5546909 | 6. 2535718 | 9. 8289176 | 6. 72E-20  | 1. 38E-18  | 34. 441864 |
| PIGC       | 1. 5574603 | 7. 5056814 | 12. 659088 | 1. 30E-29  | 1. 68E-27  | 56. 535531 |
| EXO1       | 1. 5575176 | 3. 7225035 | 9. 3633143 | 2. 09E-18  | 3. 32E-17  | 31. 052395 |
| NCAPD2     | 1. 5577858 | 6. 1763129 | 8. 8275946 | 9. 80E-17  | 1. 20E-15  | 27. 263651 |
| TTC9       | 1. 5586027 | 3. 7735005 | 6. 1860826 | 2. 06E-09  | 8. 96E-09  | 10. 739367 |
| PHPT1      | 1. 5602663 | 10. 027674 | 11. 561583 | 9. 78E-26  | 5. 96E-24  | 47. 712703 |
| NAT9       | 1. 5609145 | 7. 7914251 | 13. 519509 | 1. 02E-32  | 2. 55E-30  | 63. 613347 |
| PKM        | 1. 5622239 | 7. 1915365 | 6. 0201946 | 5. 18E-09  | 2. 14E-08  | 9. 8432116 |
| NSMCE2     | 1. 5632181 | 6. 9975344 | 12. 954536 | 1. 13E-30  | 1. 82E-28  | 58. 952169 |
| DSN1       | 1. 5642505 | 6. 7373382 | 10. 70677  | 8. 32E-23  | 3. 02E-21  | 41. 048267 |
| MAGEA6     | 1. 5646385 | 4. 1444029 | 3. 8594084 | 0. 0001398 | 0. 0003235 | 0. 0440925 |
| HES6       | 1. 5651883 | 5. 0373838 | 10. 002275 | 1. 83E-20  | 4. 17E-19  | 35. 725119 |
| PLP2       | 1. 5652316 | 7. 1029438 | 6. 2598367 | 1. 36E-09  | 6. 05E-09  | 11. 143813 |
| MAGEC2     | 1. 5667486 | 2. 7007481 | 4. 2152418 | 3. 32E-05  | 8. 38E-05  | 1. 4019603 |

|            |            |            |            |           |           |            |
|------------|------------|------------|------------|-----------|-----------|------------|
| VPS45      | 1. 5673129 | 6. 4462885 | 14. 508825 | 2. 40E-36 | 1. 11E-33 | 71. 877073 |
| Clorf198   | 1. 570331  | 8. 475531  | 8. 9005656 | 5. 84E-17 | 7. 37E-16 | 27. 772308 |
| VPS72      | 1. 5721798 | 7. 9452297 | 13. 229596 | 1. 15E-31 | 2. 38E-29 | 61. 215348 |
| ANKRD52    | 1. 5745319 | 2. 8832851 | 10. 413992 | 7. 98E-22 | 2. 35E-20 | 38. 815824 |
| SF3B4      | 1. 576401  | 5. 4533033 | 12. 099964 | 1. 27E-27 | 1. 10E-25 | 52. 007797 |
| ORC6       | 1. 5787876 | 6. 0586478 | 8. 3977282 | 1. 96E-15 | 1. 96E-14 | 24. 317471 |
| ANXA2      | 1. 5791869 | 9. 5341315 | 8. 4231616 | 1. 64E-15 | 1. 66E-14 | 24. 489324 |
| SNRPB      | 1. 5802491 | 9. 03164   | 12. 290183 | 2. 69E-28 | 2. 62E-26 | 53. 541013 |
| SLC50A1    | 1. 5804861 | 7. 7582086 | 10. 368502 | 1. 13E-21 | 3. 25E-20 | 38. 471468 |
| PLOD3      | 1. 5810951 | 9. 8407314 | 12. 960361 | 1. 08E-30 | 1. 77E-28 | 58. 999965 |
| PSPH       | 1. 5816206 | 7. 1858852 | 8. 7672418 | 1. 50E-16 | 1. 77E-15 | 26. 844783 |
| NES        | 1. 582397  | 6. 2129474 | 8. 8044088 | 1. 15E-16 | 1. 39E-15 | 27. 102537 |
| S100A10    | 1. 5909683 | 10. 743999 | 8. 5124731 | 8. 88E-16 | 9. 35E-15 | 25. 095297 |
| OLFML2A    | 1. 59098   | 3. 8319702 | 9. 9485773 | 2. 74E-20 | 6. 04E-19 | 35. 326443 |
| TTK        | 1. 5916736 | 2. 9300956 | 8. 6123459 | 4. 44E-16 | 4. 88E-15 | 25. 777472 |
| MANF       | 1. 5959229 | 11. 052991 | 11. 722348 | 2. 69E-26 | 1. 78E-24 | 48. 988022 |
| NMB        | 1. 596772  | 6. 4766561 | 9. 3308104 | 2. 65E-18 | 4. 14E-17 | 30. 819022 |
| SPATS2     | 1. 5969362 | 4. 5547174 | 11. 365622 | 4. 67E-25 | 2. 53E-23 | 46. 16706  |
| CKS1B      | 1. 5970537 | 8. 6497785 | 12. 288444 | 2. 73E-28 | 2. 65E-26 | 53. 526964 |
| CCNF       | 1. 5971562 | 3. 144742  | 9. 827728  | 6. 78E-20 | 1. 39E-18 | 34. 433097 |
| FOXS1      | 1. 5973551 | 5. 3811045 | 8. 331009  | 3. 09E-15 | 3. 02E-14 | 23. 868161 |
| UGT2B11    | 1. 5993412 | 9. 1705754 | 4. 7293749 | 3. 50E-06 | 1. 00E-05 | 3. 5493098 |
| NXPH4      | 1. 6015378 | 3. 5085368 | 5. 8261205 | 1. 49E-08 | 5. 77E-08 | 8. 8189832 |
| EZH2       | 1. 6035166 | 5. 9307933 | 10. 581123 | 2. 20E-22 | 7. 16E-21 | 40. 08683  |
| COA6       | 1. 605562  | 8. 187168  | 13. 620353 | 4. 36E-33 | 1. 18E-30 | 64. 450273 |
| LINC01089  | 1. 6076554 | 6. 9315268 | 11. 412684 | 3. 21E-25 | 1. 78E-23 | 46. 53735  |
| RFX5       | 1. 613301  | 6. 5503496 | 10. 516439 | 3. 63E-22 | 1. 12E-20 | 39. 593832 |
| SKA3       | 1. 6138106 | 4. 2730906 | 9. 1552252 | 9. 45E-18 | 1. 35E-16 | 29. 566003 |
| GRAMD1A    | 1. 6171493 | 5. 3877324 | 8. 0308713 | 2. 35E-14 | 2. 04E-13 | 21. 874616 |
| SNRPE      | 1. 6176449 | 8. 7768709 | 14. 157078 | 4. 73E-35 | 1. 71E-32 | 68. 926356 |
| CENPH      | 1. 6176662 | 4. 7087504 | 10. 125345 | 7. 22E-21 | 1. 78E-19 | 36. 642771 |
| KIF23      | 1. 6178386 | 4. 7015677 | 8. 3684752 | 2. 39E-15 | 2. 37E-14 | 24. 120201 |
| PYG02      | 1. 6237135 | 7. 9073455 | 12. 555076 | 3. 07E-29 | 3. 57E-27 | 55. 688549 |
| TONSL      | 1. 6237214 | 4. 8469296 | 11. 592032 | 7. 66E-26 | 4. 78E-24 | 47. 95375  |
| NELFE      | 1. 6255682 | 8. 134795  | 12. 485296 | 5. 44E-29 | 6. 14E-27 | 55. 121475 |
| HMBG2      | 1. 6291205 | 8. 4133943 | 8. 9493111 | 4. 13E-17 | 5. 34E-16 | 28. 113432 |
| RMI2       | 1. 629463  | 5. 7460459 | 7. 4747205 | 8. 93E-13 | 6. 07E-12 | 18. 306484 |
| SAC3D1     | 1. 6313988 | 7. 323338  | 13. 671886 | 2. 83E-33 | 7. 98E-31 | 64. 878489 |
| CDCA3      | 1. 6332779 | 4. 3831384 | 9. 8119027 | 7. 63E-20 | 1. 55E-18 | 34. 316516 |
| ENAH       | 1. 634244  | 5. 3218871 | 8. 8544708 | 8. 10E-17 | 1. 00E-15 | 27. 450716 |
| KRTCAP2    | 1. 6382664 | 10. 151996 | 15. 455616 | 7. 44E-40 | 4. 82E-37 | 79. 870461 |
| PLPPR2     | 1. 6403061 | 5. 6734459 | 13. 160895 | 2. 04E-31 | 3. 95E-29 | 60. 648941 |
| P4HA2      | 1. 6429656 | 5. 8330967 | 10. 23562  | 3. 12E-21 | 8. 27E-20 | 37. 469586 |
| MIR4435-2f | 1. 6455693 | 6. 4520309 | 10. 746215 | 6. 12E-23 | 2. 27E-21 | 41. 351124 |
| FAM83H     | 1. 647224  | 5. 8284645 | 10. 017716 | 1. 63E-20 | 3. 75E-19 | 35. 839952 |
| SCRIB      | 1. 6486198 | 8. 2133695 | 11. 187553 | 1. 92E-24 | 9. 36E-23 | 44. 77139  |
| HKDC1      | 1. 6486943 | 6. 5406345 | 5. 2305824 | 3. 22E-07 | 1. 06E-06 | 5. 8450522 |
| TRAIP      | 1. 6494804 | 5. 0114701 | 10. 442827 | 6. 40E-22 | 1. 91E-20 | 39. 034454 |
| CKS2       | 1. 6495781 | 8. 2104705 | 8. 8897796 | 6. 31E-17 | 7. 92E-16 | 27. 69697  |
| CCL25      | 1. 6505279 | 3. 9304251 | 4. 4181963 | 1. 40E-05 | 3. 71E-05 | 2. 2238718 |
| DTYMK      | 1. 6508706 | 8. 0554316 | 12. 882039 | 2. 06E-30 | 3. 05E-28 | 58. 357747 |



|           |           |           |           |          |          |           |
|-----------|-----------|-----------|-----------|----------|----------|-----------|
| TARBP1    | 1.6509203 | 6.047753  | 10.593352 | 2.00E-22 | 6.62E-21 | 40.180181 |
| GABRE     | 1.651726  | 6.9165    | 7.2308793 | 4.17E-12 | 2.60E-11 | 16.796645 |
| CGREF1    | 1.6543412 | 6.6441281 | 6.5618989 | 2.39E-10 | 1.16E-09 | 12.837998 |
| PYGB      | 1.6587081 | 6.9339763 | 10.17502  | 4.95E-21 | 1.25E-19 | 37.014696 |
| TRIP13    | 1.6612494 | 2.5709558 | 8.9579204 | 3.89E-17 | 5.04E-16 | 28.17379  |
| BAIAP2L2  | 1.6653996 | 4.4570228 | 6.6450693 | 1.47E-10 | 7.29E-10 | 13.31493  |
| SLC22A11  | 1.6657626 | 3.2878877 | 4.4488373 | 1.23E-05 | 3.27E-05 | 2.350903  |
| MCM5      | 1.668328  | 7.8680106 | 9.7257105 | 1.45E-19 | 2.84E-18 | 33.683233 |
| LRRC14    | 1.6694432 | 6.3094101 | 14.478844 | 3.09E-36 | 1.36E-33 | 71.625102 |
| SSR2      | 1.6694467 | 11.304458 | 13.359452 | 3.88E-32 | 8.69E-30 | 62.287914 |
| PEA15     | 1.6697005 | 8.2293119 | 12.224333 | 4.61E-28 | 4.28E-26 | 53.009373 |
| TKT       | 1.671396  | 10.145939 | 7.9880578 | 3.13E-14 | 2.66E-13 | 21.594019 |
| ZNF219    | 1.6726435 | 7.7404911 | 12.043234 | 2.01E-27 | 1.67E-25 | 51.55205  |
| Clorf35   | 1.673877  | 8.3094792 | 14.128975 | 6.00E-35 | 2.12E-32 | 68.691149 |
| LINC00665 | 1.6744447 | 4.9049357 | 5.5572009 | 6.15E-08 | 2.21E-07 | 7.4439561 |
| MAPK12    | 1.6755289 | 4.5697351 | 6.9090464 | 3.03E-11 | 1.65E-10 | 14.85773  |
| SNHG7     | 1.677927  | 5.9014835 | 9.9127741 | 3.59E-20 | 7.77E-19 | 35.061213 |
| CCT3      | 1.6819988 | 11.131487 | 15.23194  | 5.05E-39 | 2.94E-36 | 77.976575 |
| RAB11FIP4 | 1.6849624 | 5.6392374 | 8.9695649 | 3.58E-17 | 4.67E-16 | 28.255481 |
| FABP4     | 1.6894075 | 3.450643  | 5.1472061 | 4.85E-07 | 1.56E-06 | 5.4497134 |
| ADAM15    | 1.6906662 | 6.8557853 | 11.003078 | 8.21E-24 | 3.62E-22 | 43.33482  |
| BUB1B     | 1.6927229 | 4.2460255 | 8.6192789 | 4.23E-16 | 4.67E-15 | 25.825004 |
| MND1      | 1.6929673 | 4.470055  | 10.899022 | 1.86E-23 | 7.71E-22 | 42.528844 |
| LAMC1     | 1.6944712 | 7.3608919 | 8.7145058 | 2.17E-16 | 2.50E-15 | 26.48015  |
| MCM4      | 1.696037  | 5.8749284 | 8.780001  | 1.37E-16 | 1.63E-15 | 26.933197 |
| FANCI     | 1.696051  | 4.4413194 | 9.4532366 | 1.08E-18 | 1.81E-17 | 31.700283 |
| ECT2      | 1.6968441 | 3.9812558 | 8.4638365 | 1.24E-15 | 1.28E-14 | 24.764821 |
| KIFC2     | 1.7006981 | 5.6718206 | 9.5289662 | 6.21E-19 | 1.08E-17 | 32.248458 |
| ITGA6     | 1.7014582 | 7.2867486 | 9.6381092 | 2.78E-19 | 5.14E-18 | 33.042521 |
| RGS5      | 1.7039952 | 6.2343184 | 7.5909697 | 4.23E-13 | 3.02E-12 | 19.038262 |
| MCM7      | 1.704181  | 9.2009408 | 10.809196 | 3.75E-23 | 1.45E-21 | 41.835671 |
| C1QL1     | 1.7042694 | 3.5643697 | 4.9956546 | 1.01E-06 | 3.10E-06 | 4.7447262 |
| GIN51     | 1.7047136 | 2.6683986 | 8.6061991 | 4.63E-16 | 5.08E-15 | 25.73535  |
| FAM111B   | 1.7071154 | 2.8426188 | 8.6288209 | 3.95E-16 | 4.39E-15 | 25.890459 |
| CAPG      | 1.7148466 | 8.1145031 | 6.3168212 | 9.85E-10 | 4.45E-09 | 11.458803 |
| SLC6A8    | 1.7172724 | 5.0467137 | 5.5764309 | 5.56E-08 | 2.01E-07 | 7.5405484 |
| HSF4      | 1.7201886 | 5.6234946 | 10.224654 | 3.39E-21 | 8.82E-20 | 37.387174 |
| MSTO1     | 1.724905  | 5.1430329 | 16.134837 | 2.19E-42 | 1.58E-39 | 85.635657 |
| MCAM      | 1.7263257 | 6.4389804 | 9.3647613 | 2.07E-18 | 3.29E-17 | 31.062794 |
| NR2C2AP   | 1.729321  | 7.4835495 | 13.991623 | 1.92E-34 | 6.28E-32 | 67.542872 |
| UPK3A     | 1.7294512 | 3.9353736 | 4.2417991 | 2.97E-05 | 7.54E-05 | 1.507572  |
| PABPC1L   | 1.7329528 | 5.8974769 | 8.8272461 | 9.82E-17 | 1.20E-15 | 27.261228 |
| SCNM1     | 1.7375793 | 7.415629  | 14.478956 | 3.09E-36 | 1.36E-33 | 71.626041 |
| ACTG2     | 1.7382152 | 5.643472  | 7.9779108 | 3.35E-14 | 2.83E-13 | 21.527658 |
| LOXL2     | 1.7439527 | 6.0324439 | 10.405044 | 8.55E-22 | 2.50E-20 | 38.74803  |
| SCAMP3    | 1.7463042 | 8.1603097 | 15.357816 | 1.72E-39 | 1.07E-36 | 79.042037 |
| FLVCR1    | 1.7488303 | 5.1764579 | 11.526027 | 1.30E-25 | 7.77E-24 | 47.431519 |
| LYZ       | 1.7555134 | 8.5667116 | 4.2210206 | 3.24E-05 | 8.19E-05 | 1.4248912 |
| ZNF692    | 1.7559712 | 6.9646788 | 13.439512 | 1.99E-32 | 4.84E-30 | 62.950436 |
| SNCG      | 1.7587503 | 4.8896111 | 6.1437363 | 2.61E-09 | 1.12E-08 | 10.508816 |
| SPSB2     | 1.7688377 | 6.4365    | 13.185023 | 1.66E-31 | 3.34E-29 | 60.847779 |

|          |           |           |           |           |           |           |
|----------|-----------|-----------|-----------|-----------|-----------|-----------|
| NECAB3   | 1.7719988 | 7.0503739 | 12.962395 | 1.06E-30  | 1.77E-28  | 59.016657 |
| KIAA1522 | 1.7721695 | 8.2202921 | 10.04289  | 1.35E-20  | 3.16E-19  | 36.027361 |
| ATAD2    | 1.7722835 | 5.2995879 | 8.9702552 | 3.56E-17  | 4.65E-16  | 28.260325 |
| PTP4A3   | 1.7810489 | 4.8731363 | 8.3609119 | 2.52E-15  | 2.49E-14  | 24.069266 |
| DLGAP5   | 1.781142  | 4.1304152 | 9.3149513 | 2.97E-18  | 4.58E-17  | 30.705315 |
| PODXL    | 1.7821852 | 7.6973326 | 9.2031395 | 6.69E-18  | 9.79E-17  | 29.906637 |
| TBC1D16  | 1.7850772 | 5.6271535 | 12.135987 | 9.46E-28  | 8.37E-26  | 52.297559 |
| TYMS     | 1.7867089 | 7.2842152 | 8.2162564 | 6.75E-15  | 6.25E-14  | 23.100561 |
| CENPU    | 1.7867157 | 5.6135748 | 9.1957192 | 7.06E-18  | 1.03E-16  | 29.85382  |
| IRAK1    | 1.78688   | 8.3550317 | 11.518639 | 1.38E-25  | 8.21E-24  | 47.373131 |
| UBE2S    | 1.7886825 | 6.5121039 | 11.366893 | 4.63E-25  | 2.52E-23  | 46.177052 |
| GBA      | 1.7890543 | 7.7045607 | 12.707423 | 8.74E-30  | 1.14E-27  | 56.929825 |
| HDAC11   | 1.7903546 | 5.4210896 | 12.086561 | 1.41E-27  | 1.21E-25  | 51.90006  |
| TREM2    | 1.7924814 | 5.2364157 | 7.5405874 | 5.85E-13  | 4.10E-12  | 18.720175 |
| CEP131   | 1.7946871 | 6.1118565 | 13.331466 | 4.90E-32  | 1.07E-29  | 62.05655  |
| MCM6     | 1.7952841 | 7.1944309 | 10.037821 | 1.40E-20  | 3.25E-19  | 35.989603 |
| FAM189B  | 1.7975856 | 6.5773812 | 13.365919 | 3.68E-32  | 8.51E-30  | 62.341394 |
| BOP1     | 1.7979473 | 8.0089511 | 10.712052 | 7.98E-23  | 2.91E-21  | 41.088797 |
| MCM3     | 1.7998523 | 8.5743931 | 9.7697571 | 1.04E-19  | 2.09E-18  | 34.006505 |
| CCNE1    | 1.8026153 | 5.7733039 | 6.8869368 | 3.46E-11  | 1.88E-10  | 14.726841 |
| ASPM     | 1.8089609 | 4.7181599 | 9.4139817 | 1.44E-18  | 2.36E-17  | 31.417045 |
| SMG5     | 1.8112725 | 8.4939692 | 12.948154 | 1.19E-30  | 1.90E-28  | 58.899807 |
| DDX39A   | 1.8156645 | 8.7381991 | 12.440915 | 7.83E-29  | 8.41E-27  | 54.761311 |
| ZNF775   | 1.8171857 | 6.967304  | 11.050739 | 5.65E-24  | 2.56E-22  | 43.705048 |
| GPAA1    | 1.8207287 | 8.9928373 | 14.100151 | 7.66E-35  | 2.66E-32  | 68.45     |
| SORT1    | 1.8249497 | 5.6619985 | 9.192283  | 7.24E-18  | 1.05E-16  | 29.82937  |
| ITPKA    | 1.8272337 | 6.1347141 | 7.4584489 | 9.91E-13  | 6.69E-12  | 18.204665 |
| KPNA2    | 1.8328982 | 8.6802172 | 10.585947 | 2.12E-22  | 6.97E-21  | 40.12365  |
| TMEM106C | 1.8329854 | 9.4488584 | 11.503541 | 1.56E-25  | 9.20E-24  | 47.253859 |
| EFNA4    | 1.8337809 | 6.4046151 | 12.072514 | 1.59E-27  | 1.34E-25  | 51.787187 |
| CYP17A1  | 1.8365027 | 5.8053494 | 3.9093993 | 0.0001149 | 0.0002695 | 0.2283738 |
| KIFC1    | 1.8382031 | 4.0868026 | 9.5780935 | 4.33E-19  | 7.65E-18  | 32.605298 |
| NUDT1    | 1.8399009 | 7.0063169 | 11.515998 | 1.41E-25  | 8.36E-24  | 47.35226  |
| FABP5    | 1.8431222 | 6.4947791 | 8.9369744 | 4.51E-17  | 5.78E-16  | 28.026998 |
| SNHG1    | 1.8453989 | 7.8110414 | 10.750893 | 5.90E-23  | 2.21E-21  | 41.387068 |
| ETV4     | 1.8472979 | 4.3010209 | 5.3433749 | 1.83E-07  | 6.25E-07  | 6.3882298 |
| UCK2     | 1.8505643 | 6.9374677 | 13.011269 | 7.06E-31  | 1.21E-28  | 59.41795  |
| GLI4     | 1.8547258 | 5.2252789 | 13.372144 | 3.49E-32  | 8.18E-30  | 62.392884 |
| GBP2     | 1.8618239 | 7.815642  | 9.8961811 | 4.06E-20  | 8.68E-19  | 34.938452 |
| FEN1     | 1.8704635 | 6.4412865 | 11.781598 | 1.67E-26  | 1.14E-24  | 49.459633 |
| ZIC2     | 1.8705616 | 2.1542846 | 7.7913868 | 1.15E-13  | 8.93E-13  | 20.317519 |
| PGC      | 1.8720598 | 3.8235972 | 3.713292  | 0.0002447 | 0.0005485 | -0.48222  |
| SLC51B   | 1.8735359 | 5.7747074 | 6.403449  | 6.00E-10  | 2.77E-09  | 11.941795 |
| PAFAH1B3 | 1.8741635 | 6.4499069 | 8.1642462 | 9.60E-15  | 8.71E-14  | 22.754841 |
| ASF1B    | 1.8779564 | 5.0287052 | 9.0453275 | 2.08E-17  | 2.79E-16  | 28.788448 |
| HMGA1    | 1.8844653 | 6.5744032 | 8.6197641 | 4.21E-16  | 4.66E-15  | 25.828331 |
| BUB1     | 1.8900219 | 3.7016038 | 9.623134  | 3.10E-19  | 5.67E-18  | 32.933292 |
| CLDN15   | 1.8934266 | 6.6547049 | 7.386819  | 1.56E-12  | 1.03E-11  | 17.758246 |
| KAT2A    | 1.8968858 | 8.6815023 | 12.9168   | 1.55E-30  | 2.39E-28  | 58.642651 |
| REG1A    | 1.9016115 | 3.4572953 | 3.5871984 | 0.0003913 | 0.0008498 | -0.921535 |
| PEG10    | 1.9031593 | 4.1861564 | 3.7152255 | 0.0002429 | 0.0005449 | -0.475376 |

|          |           |           |           |           |           |           |
|----------|-----------|-----------|-----------|-----------|-----------|-----------|
| VWF      | 1.903682  | 5.9511003 | 8.7711726 | 1.46E-16  | 1.73E-15  | 26.872013 |
| MKI67    | 1.9048906 | 3.3671198 | 9.2600909 | 4.43E-18  | 6.65E-17  | 30.312787 |
| CDC25C   | 1.9110468 | 3.6509017 | 10.340812 | 1.40E-21  | 3.94E-20  | 38.262201 |
| ALDH3A1  | 1.9167748 | 3.6613399 | 3.6708743 | 0.000287  | 0.000637  | -0.63155  |
| PKMYT1   | 1.9174029 | 4.9966097 | 9.968194  | 2.36E-20  | 5.30E-19  | 35.471964 |
| CDC45    | 1.9218639 | 5.4978726 | 10.012901 | 1.69E-20  | 3.87E-19  | 35.804131 |
| TPX2     | 1.9221449 | 5.7947426 | 8.1911026 | 8.00E-15  | 7.34E-14  | 22.933188 |
| RFC4     | 1.9276547 | 7.1783661 | 11.598245 | 7.29E-26  | 4.58E-24  | 48.002964 |
| NCAPG    | 1.9361326 | 5.1881855 | 9.9484713 | 2.74E-20  | 6.04E-19  | 35.325657 |
| AKR1C3   | 1.9388142 | 11.717974 | 11.430841 | 2.78E-25  | 1.56E-23  | 46.68036  |
| ANLN     | 1.9442425 | 3.5492541 | 9.1168384 | 1.25E-17  | 1.73E-16  | 29.293812 |
| DTL      | 1.9449229 | 4.5818189 | 9.6071867 | 3.49E-19  | 6.32E-18  | 32.817069 |
| AFP      | 1.9452326 | 4.8291503 | 3.4795951 | 0.0005782 | 0.0012207 | -1.285429 |
| PDGFA    | 1.950454  | 6.192248  | 8.2319468 | 6.07E-15  | 5.69E-14  | 23.205126 |
| TP53I3   | 1.951671  | 7.5263461 | 10.369946 | 1.12E-21  | 3.22E-20  | 38.482391 |
| CENPA    | 1.9529856 | 3.3267757 | 9.3745279 | 1.93E-18  | 3.08E-17  | 31.133008 |
| PAGE4    | 1.9556538 | 3.4379343 | 3.8747793 | 0.0001316 | 0.0003057 | 0.1005264 |
| COX4I2   | 1.9568895 | 4.0704337 | 13.6308   | 4.00E-33  | 1.09E-30  | 64.537057 |
| RACGAP1  | 1.9632421 | 5.42108   | 10.849363 | 2.74E-23  | 1.10E-21  | 42.145335 |
| COX7B2   | 1.9710753 | 3.0400958 | 4.7559775 | 3.10E-06  | 8.92E-06  | 3.6662261 |
| NOTCH3   | 1.9746886 | 4.3532066 | 9.1883359 | 7.45E-18  | 1.08E-16  | 29.80129  |
| TOMM40L  | 1.9809011 | 7.3765856 | 16.807191 | 6.78E-45  | 7.19E-42  | 91.354969 |
| COL4A2   | 1.9925947 | 9.4682754 | 9.0482849 | 2.04E-17  | 2.73E-16  | 28.809304 |
| CENPF    | 2.0109567 | 4.2730209 | 9.6551642 | 2.45E-19  | 4.60E-18  | 33.167027 |
| CDC6     | 2.0176171 | 4.7150885 | 9.7676793 | 1.06E-19  | 2.11E-18  | 33.991239 |
| DBNDD1   | 2.0216097 | 5.4070118 | 8.6301572 | 3.92E-16  | 4.35E-15  | 25.899629 |
| MAGEA1   | 2.0233165 | 3.1825455 | 5.1629283 | 4.49E-07  | 1.45E-06  | 5.523858  |
| CRIP3    | 2.0268571 | 5.47655   | 9.1576453 | 9.29E-18  | 1.33E-16  | 29.583184 |
| SPARCL1  | 2.0305612 | 8.33367   | 6.3588572 | 7.75E-10  | 3.54E-09  | 11.692552 |
| CPLX2    | 2.0354507 | 4.641607  | 4.4838983 | 1.05E-05  | 2.83E-05  | 2.4971988 |
| COL4A1   | 2.036569  | 6.3602265 | 9.4694301 | 9.62E-19  | 1.62E-17  | 31.817306 |
| RNASEH2A | 2.0483352 | 7.4903975 | 12.70768  | 8.72E-30  | 1.14E-27  | 56.931922 |
| SEZ6L2   | 2.0506519 | 5.5138671 | 5.1654538 | 4.43E-07  | 1.43E-06  | 5.5357854 |
| HSPB1    | 2.0522903 | 12.108505 | 11.963997 | 3.82E-27  | 3.03E-25  | 50.916701 |
| TACC3    | 2.053045  | 5.6914353 | 10.553062 | 2.74E-22  | 8.72E-21  | 39.872792 |
| MELK     | 2.0538013 | 4.0769513 | 10.055252 | 1.23E-20  | 2.91E-19  | 36.119467 |
| TPM2     | 2.0636092 | 7.7526614 | 10.445406 | 6.27E-22  | 1.88E-20  | 39.054018 |
| HJURP    | 2.0666066 | 3.954033  | 10.053431 | 1.24E-20  | 2.95E-19  | 36.105894 |
| GAS5     | 2.0675767 | 9.6196845 | 10.784076 | 4.56E-23  | 1.74E-21  | 41.642265 |
| PDZK1IP1 | 2.0677027 | 7.3869109 | 3.8400026 | 0.0001507 | 0.0003475 | -0.026866 |
| RBP7     | 2.0750093 | 6.9962901 | 10.817473 | 3.51E-23  | 1.37E-21  | 41.899444 |
| KIF4A    | 2.0769669 | 4.0990975 | 9.9920375 | 1.98E-20  | 4.50E-19  | 35.649029 |
| SSX1     | 2.0821183 | 2.7337467 | 4.6138626 | 5.91E-06  | 1.64E-05  | 3.0481883 |
| IQGAP3   | 2.0900837 | 5.4027508 | 10.364209 | 1.17E-21  | 3.33E-20  | 38.439004 |
| HMMR     | 2.0993441 | 5.4742599 | 10.271026 | 2.38E-21  | 6.48E-20  | 37.735942 |
| NUSAP1   | 2.1000481 | 5.1642687 | 9.8018387 | 8.22E-20  | 1.66E-18  | 34.242427 |
| THBS4    | 2.1014545 | 4.6599929 | 7.9221866 | 4.85E-14  | 4.01E-13  | 21.164186 |
| APLN     | 2.1017078 | 5.1047617 | 9.666252  | 2.25E-19  | 4.26E-18  | 33.248032 |
| RECQL4   | 2.1035901 | 5.8873192 | 11.365432 | 4.68E-25  | 2.53E-23  | 46.165567 |
| PBK      | 2.1049748 | 4.6781763 | 9.7480843 | 1.23E-19  | 2.42E-18  | 33.847349 |
| MMP11    | 2.1079306 | 5.1245972 | 8.1970291 | 7.69E-15  | 7.07E-14  | 22.972594 |

|            |           |           |           |          |           |           |
|------------|-----------|-----------|-----------|----------|-----------|-----------|
| KIF2C      | 2.1109299 | 5.2810893 | 9.8711825 | 4.90E-20 | 1.03E-18  | 34.753696 |
| NEK2       | 2.1130666 | 3.3860539 | 10.057772 | 1.20E-20 | 2.86E-19  | 36.13825  |
| FAM83D     | 2.1136423 | 5.1577655 | 10.196637 | 4.20E-21 | 1.08E-19  | 37.176813 |
| NT5DC2     | 2.1188302 | 5.5767289 | 8.4261224 | 1.61E-15 | 1.63E-14  | 24.509351 |
| MXD3       | 2.1207453 | 4.730049  | 13.885201 | 4.70E-34 | 1.51E-31  | 66.65466  |
| CENPM      | 2.1337586 | 4.0967902 | 10.051294 | 1.26E-20 | 2.99E-19  | 36.089971 |
| HRCT1      | 2.1432876 | 5.0330784 | 7.3481136 | 2.00E-12 | 1.30E-11  | 17.51825  |
| G6PD       | 2.1622931 | 5.1876891 | 8.7031446 | 2.35E-16 | 2.69E-15  | 26.401764 |
| CDCA8      | 2.1627776 | 5.7111779 | 10.23945  | 3.03E-21 | 8.06E-20  | 37.498376 |
| CD34       | 2.1641471 | 5.532348  | 14.749553 | 3.10E-37 | 1.55E-34  | 73.903123 |
| CDKN2C     | 2.1695186 | 7.3252316 | 11.217247 | 1.52E-24 | 7.54E-23  | 45.003525 |
| GMNN       | 2.1796881 | 7.9121288 | 11.561671 | 9.77E-26 | 5.96E-24  | 47.713401 |
| SULT1C2    | 2.180501  | 4.0304539 | 6.2669663 | 1.31E-09 | 5.82E-09  | 11.183104 |
| CTHRC1     | 2.1942363 | 5.1078261 | 7.1929603 | 5.28E-12 | 3.24E-11  | 16.564971 |
| KIF20A     | 2.2094518 | 4.3303754 | 10.118732 | 7.59E-21 | 1.87E-19  | 36.593329 |
| CDCA5      | 2.219784  | 5.3311079 | 11.279956 | 9.23E-25 | 4.79E-23  | 45.494548 |
| TROAP      | 2.221663  | 5.5570995 | 10.104033 | 8.48E-21 | 2.07E-19  | 36.483474 |
| SQLE       | 2.2274123 | 7.9728865 | 9.2546658 | 4.61E-18 | 6.89E-17  | 30.274039 |
| MCM2       | 2.2286642 | 6.7784061 | 9.8768381 | 4.69E-20 | 9.95E-19  | 34.795475 |
| NUF2       | 2.2302214 | 4.5342946 | 10.199781 | 4.10E-21 | 1.06E-19  | 37.200408 |
| ZWINT      | 2.2395486 | 6.1279737 | 10.538028 | 3.07E-22 | 9.64E-21  | 39.758225 |
| NDC80      | 2.262136  | 4.3866709 | 11.183095 | 1.99E-24 | 9.64E-23  | 44.73656  |
| CCNA2      | 2.2924921 | 4.168438  | 9.5981602 | 3.73E-19 | 6.68E-18  | 32.751329 |
| DUSP9      | 2.2954273 | 5.0127642 | 7.2660639 | 3.35E-12 | 2.11E-11  | 17.01237  |
| STMN1      | 2.3041863 | 6.8452462 | 11.591021 | 7.73E-26 | 4.81E-24  | 47.945749 |
| CDKN2A     | 2.3086496 | 6.3772245 | 10.077175 | 1.04E-20 | 2.50E-19  | 36.282954 |
| TK1        | 2.3280583 | 8.7361547 | 10.93221  | 1.43E-23 | 6.11E-22  | 42.785562 |
| AURKB      | 2.3321705 | 4.0285478 | 10.528909 | 3.30E-22 | 1.03E-20  | 39.688772 |
| CCL20      | 2.3399605 | 6.2814668 | 5.2167566 | 3.44E-07 | 1.13E-06  | 5.7791308 |
| ROB01      | 2.3436189 | 5.2037907 | 8.9561828 | 3.94E-17 | 5.10E-16  | 28.161605 |
| CAP2       | 2.357957  | 6.3557691 | 10.648503 | 1.31E-22 | 4.52E-21  | 40.601794 |
| CDT1       | 2.363113  | 5.5138525 | 10.735779 | 6.64E-23 | 2.45E-21  | 41.270951 |
| SPC24      | 2.3748572 | 4.5082653 | 11.916038 | 5.64E-27 | 4.28E-25  | 50.532841 |
| AURKA      | 2.3773563 | 5.909989  | 12.602233 | 2.08E-29 | 2.57E-27  | 56.072304 |
| CDK1       | 2.3902052 | 5.2448277 | 10.804328 | 3.89E-23 | 1.51E-21  | 41.798173 |
| FOXM1      | 2.4040654 | 4.9061321 | 10.140459 | 6.44E-21 | 1.60E-19  | 36.755844 |
| PLK1       | 2.4563155 | 5.0290401 | 10.247875 | 2.84E-21 | 7.60E-20  | 37.561727 |
| RRM2       | 2.4909467 | 4.9379689 | 11.365836 | 4.66E-25 | 2.53E-23  | 46.16874  |
| REG3A      | 2.5032985 | 3.9343029 | 3.7390074 | 0.000222 | 0.0005006 | -0.390929 |
| PRC1       | 2.5057067 | 6.1941961 | 11.24293  | 1.24E-24 | 6.27E-23  | 45.204501 |
| ACSL4      | 2.5205556 | 7.4970133 | 6.1487955 | 2.54E-09 | 1.09E-08  | 10.536297 |
| SLC26A6    | 2.5282796 | 5.9220964 | 16.398937 | 2.27E-43 | 1.86E-40  | 87.881311 |
| TGM3       | 2.56439   | 3.870227  | 7.3052212 | 2.62E-12 | 1.67E-11  | 17.253306 |
| ST8SIA6-AS | 2.5728875 | 4.3352924 | 6.4249501 | 5.30E-10 | 2.46E-09  | 12.062443 |
| S100P      | 2.6241512 | 6.9517402 | 4.7305527 | 3.48E-06 | 9.96E-06  | 3.5544742 |
| EEF1A2     | 2.6266334 | 5.2411831 | 4.770341  | 2.90E-06 | 8.39E-06  | 3.7295862 |
| UBD        | 2.6307928 | 9.626763  | 8.7977376 | 1.21E-16 | 1.45E-15  | 27.056225 |
| COL15A1    | 2.6323123 | 4.3504462 | 12.23957  | 4.07E-28 | 3.82E-26  | 53.13231  |
| NDUFA4L2   | 2.6387098 | 4.9288603 | 13.358904 | 3.90E-32 | 8.69E-30  | 62.283386 |
| THY1       | 2.6609423 | 8.2099627 | 13.847899 | 6.44E-34 | 2.00E-31  | 66.343657 |
| ESM1       | 2.6835723 | 3.465503  | 10.36445  | 1.17E-21 | 3.33E-20  | 38.440833 |

|         |           |           |           |          |          |           |
|---------|-----------|-----------|-----------|----------|----------|-----------|
| CDKN3   | 2.6920551 | 5.6243115 | 12.573359 | 2.64E-29 | 3.11E-27 | 55.837277 |
| EPS8L3  | 2.6921036 | 3.6929918 | 7.9135814 | 5.13E-14 | 4.23E-13 | 21.108204 |
| CCNB2   | 2.7455329 | 5.2692948 | 11.555893 | 1.02E-25 | 6.22E-24 | 47.667686 |
| SPP1    | 2.7465752 | 9.330539  | 4.7843079 | 2.72E-06 | 7.89E-06 | 3.7913534 |
| CCNB1   | 2.7672645 | 6.2619981 | 12.496993 | 4.94E-29 | 5.64E-27 | 55.216471 |
| E2F1    | 2.787895  | 5.292265  | 11.781327 | 1.67E-26 | 1.14E-24 | 49.457472 |
| TOP2A   | 2.8160324 | 5.0298896 | 10.658452 | 1.21E-22 | 4.21E-21 | 40.677954 |
| MYBL2   | 2.8309101 | 5.3904666 | 9.6045181 | 3.56E-19 | 6.42E-18 | 32.79763  |
| UBE2T   | 2.9284109 | 6.6913501 | 14.597766 | 1.13E-36 | 5.35E-34 | 72.625048 |
| BIRC5   | 2.9517795 | 5.0883125 | 11.883501 | 7.34E-27 | 5.36E-25 | 50.272711 |
| NQO1    | 2.9565499 | 4.9964937 | 5.8508607 | 1.30E-08 | 5.09E-08 | 8.9480797 |
| SFN     | 2.9604495 | 5.2800424 | 7.1135648 | 8.65E-12 | 5.14E-11 | 16.082653 |
| PTTG1   | 2.9817642 | 7.3203345 | 12.493413 | 5.09E-29 | 5.78E-27 | 55.187394 |
| MUC13   | 3.0054767 | 5.0401121 | 5.8996575 | 1.00E-08 | 3.98E-08 | 9.2039709 |
| SPINK1  | 3.0109568 | 9.2422941 | 4.5189673 | 9.01E-06 | 2.45E-05 | 2.6445283 |
| LCN2    | 3.0181964 | 7.5404118 | 5.5024547 | 8.15E-08 | 2.89E-07 | 7.1704464 |
| CDC20   | 3.1358123 | 5.7511957 | 11.795691 | 1.49E-26 | 1.04E-24 | 49.571935 |
| PLVAP   | 3.315957  | 7.1036295 | 21.325353 | 1.23E-61 | 2.77E-58 | 129.46304 |
| AKR1B10 | 3.6590449 | 10.115392 | 6.0217045 | 5.14E-09 | 2.12E-08 | 9.8512831 |
| MDK     | 3.7632853 | 9.053744  | 12.16454  | 7.50E-28 | 6.77E-26 | 52.527432 |
| GPC3    | 5.0715746 | 8.9333733 | 9.8585566 | 5.38E-20 | 1.13E-18 | 34.660472 |
