# Supplementary material for: The Landscape of Using Glycosyltransferase Gene Signatures for Overall Survival Prediction in Hepatocellular Carcinoma
Source: Hindawi journal article supplement (doi:10.1155/2022/5989419), 2022-06-21

Kaplan–Meier Curve for Survival

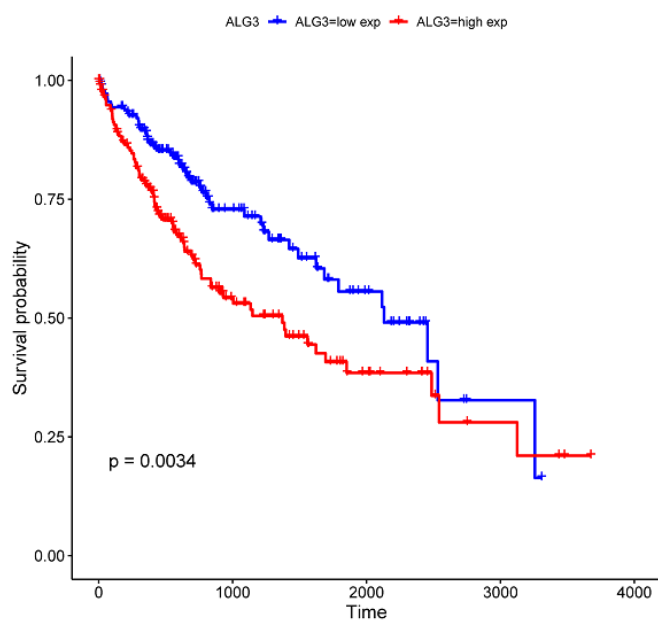

Kaplan–Meier Curve for Survival

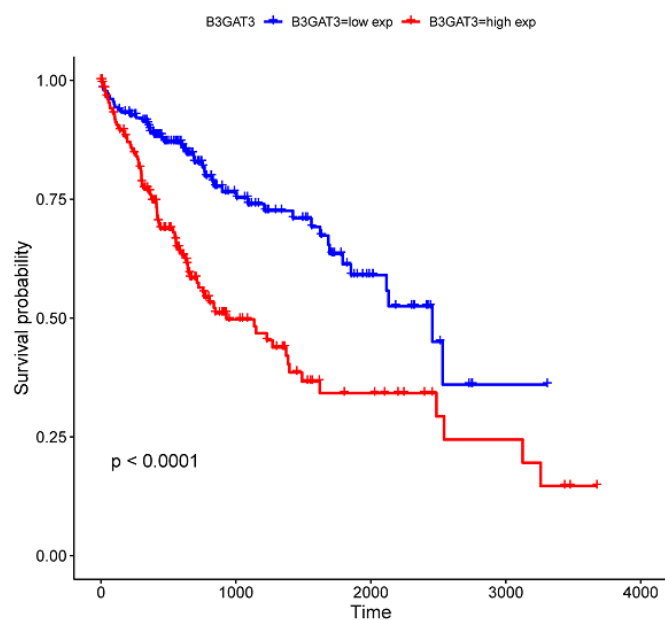

Kaplan–Meier Curve for Survival

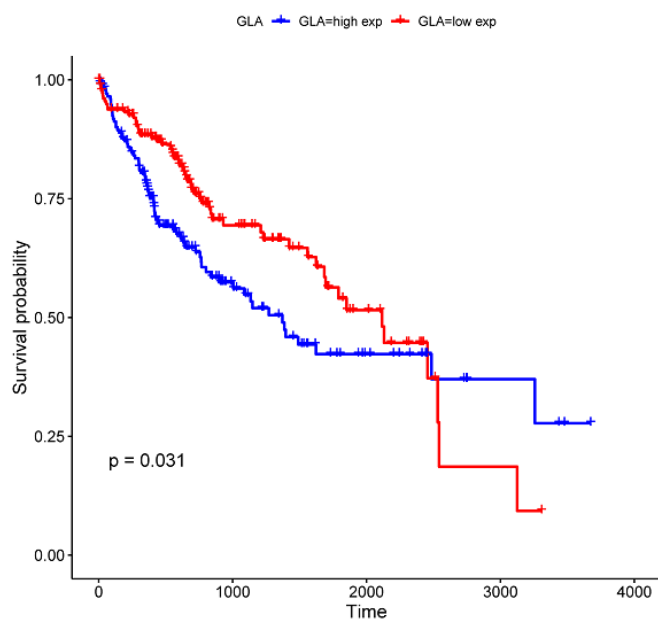

Kaplan–Meier Curve for Survival

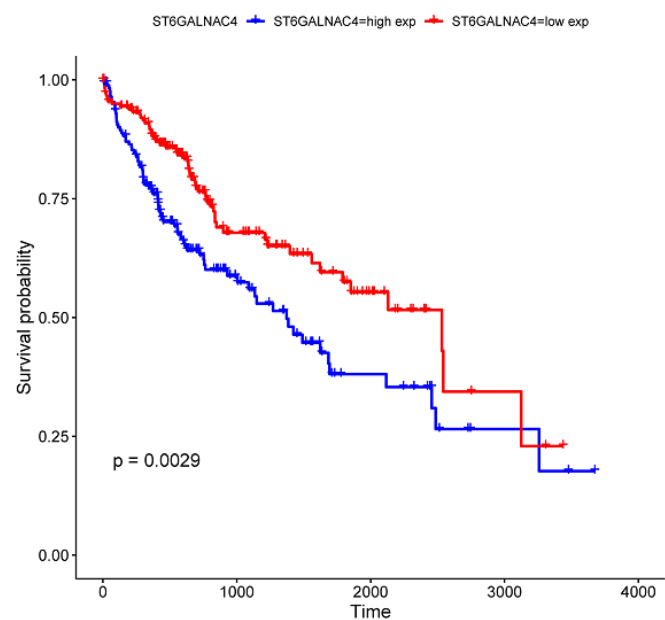

Supplement: f1 [file 5989419.f1.zip]
