# Supplementary material for: The Landscape of Using Glycosyltransferase Gene Signatures for Overall Survival Prediction in Hepatocellular Carcinoma
Source: Hindawi journal article supplement (doi:10.1155/2022/5989419), 2022-06-21
Supplement: f1 [file 5989419.f1.zip]

| case_sub | miage_at_in | days_to_de | ethnicity | gender         | vital_sta | tajcc_path | cajcc_path | c |
|----------|-------------|------------|-----------|----------------|-----------|------------|------------|---|
| 1        | TCGA-DD-A   | 48         | '--       | not hispa      | male      | Alive      | MO         |   |
| 2        | TCGA-DD-A   | 32         | '--       | not hispa      | male      | Alive      | MO         |   |
| 3        | TCGA-BC-4   | 73         | '--       | not hispa      | male      | Alive      | MX         |   |
| 4        | TCGA-MI-A   | 61         | '--       | not hispa      | male      | Alive      | MO         |   |
| 5        | TCGA-G3-A   | 31         | '--       | not hispa      | male      | Alive      | MX         |   |
| 6        | TCGA-DD-A   | 69         | '--       | not hispa      | male      | Alive      | MO         |   |
| 7        | TCGA-CC-A   | 68         | '--       | not hispa      | male      | Alive      | MO         |   |
| 8        | TCGA-CC-A   | 54         | '--       | not hispa      | male      | Alive      | MO         |   |
| 9        | TCGA-DD-A   | 42         |           | 1149 not hispa | male      | Dead       | MO         |   |
| 10       | TCGA-WX-A   | 61         | '--       | not hispa      | male      | Alive      | MX         |   |
| 11       | TCGA-DD-A   | 69         | '--       | not hispa      | male      | Alive      | MO         |   |
| 12       | TCGA-DD-A   | 66         | '--       | not hispa      | male      | Alive      | MO         |   |
| 13       | TCGA-5C-A   | 58         | '--       | not hispa      | male      | Alive      | MO         |   |
| 14       | TCGA-BC-A   | 66         | '--       | not report     | female    | Alive      | MO         |   |
| 15       | TCGA-G3-A   | 73         | '--       | not hispa      | male      | Alive      | MO         |   |
| 16       | TCGA-RG-A   | 69         | '--       | not hispa      | male      | Alive      | MO         |   |
| 17       | TCGA-G3-A   | 83         |           | 27 not hispa   | female    | Dead       | MO         |   |
| 18       | TCGA-DD-A   | 73         | '--       | not hispa      | female    | Alive      | MO         |   |
| 19       | TCGA-DD-A   | 32         | '--       | not hispa      | male      | Alive      | MO         |   |
| 20       | TCGA-BC-A   | 66         |           | 308 not hispa  | female    | Dead       | MX         |   |
| 21       | TCGA-DD-A   | 78         |           | 1694 not hispa | female    | Dead       | MO         |   |
| 22       | TCGA-DD-A   | 43         | '--       | not hispa      | male      | Alive      | MO         |   |
| 23       | TCGA-2Y-A   | 82         |           | 848 not hispa  | female    | Dead       | MX         |   |
| 24       | TCGA-DD-A   | 57         |           | 1560 not hispa | female    | Dead       | MO         |   |
| 25       | TCGA-DD-A   | 50         |           | 432 not hispa  | male      | Dead       | MO         |   |
| 26       | TCGA-DD-A   | 68         | '--       | not hispa      | male      | Alive      | MO         |   |
| 27       | TCGA-UB-A   | 62         | '--       | not hispa      | female    | Alive      | MO         |   |
| 28       | TCGA-DD-A   | 72         | '--       | not hispa      | male      | Alive      | MO         |   |
| 29       | TCGA-DD-A   | 54         | '--       | not hispa      | male      | Alive      | MO         |   |
| 30       | TCGA-G3-A   | 70         |           | 56 not hispa   | male      | Dead       | MX         |   |
| 31       | TCGA-DD-A   | 35         | '--       | not hispa      | male      | Alive      | MO         |   |
| 32       | TCGA-DD-A   | 38         | '--       | not hispa      | male      | Alive      | MO         |   |
| 33       | TCGA-BD-A   | 69         | '--       | not report     | male      | Alive      | MX         |   |
| 34       | TCGA-G3-A   | 44         |           | 768 not hispa  | male      | Dead       | MO         |   |
| 35       | TCGA-DD-A   | 46         | '--       | not hispa      | male      | Alive      | MO         |   |
| 36       | TCGA-G3-A   | 50         | '--       | not hispa      | male      | Alive      | MO         |   |
| 37       | TCGA-FV-A   | 75         |           | 194 not hispa  | male      | Dead       | MX         |   |
| 38       | TCGA-2Y-A   | 81         | '--       | not hispa      | female    | Alive      | MX         |   |
| 39       | TCGA-EP-A   | 46         |           | 596 not hispa  | female    | Dead       | MX         |   |
| 40       | TCGA-CC-A   | 39         |           | 344 not hispa  | female    | Dead       | MO         |   |
| 41       | TCGA-DD-A   | 25         | '--       | not hispa      | male      | Alive      | MO         |   |
| 42       | TCGA-PD-A   | 58         |           | 639 not hispa  | female    | Dead       | MO         |   |
| 43       | TCGA-CC-5   | 44         |           | 97 not hispa   | male      | Dead       | MO         |   |
| 44       | TCGA-DD-A   | 73         |           | 14 not hispa   | male      | Dead       | MO         |   |
| 45       | TCGA-GJ-A   | 75         |           | 31 not hispa   | female    | Dead       | MX         |   |
| 46       | TCGA-CC-5   | 67         |           | 103 not hispa  | male      | Dead       | MO         |   |
| 47       | TCGA-DD-A   | 48         | '--       | not hispa      | male      | Alive      | MO         |   |
| 48       | TCGA-DD-A   | 57         |           | 394 not hispa  | female    | Dead       | MO         |   |
| 49       | TCGA-XR-A   | 58         | '--       | hispanic       | cmale     | Alive      | MO         |   |
| 50       | TCGA-DD-A   | 70         | '--       | not hispa      | female    | Alive      | MO         |   |

|                    |         |                       |       |    |
|--------------------|---------|-----------------------|-------|----|
| 51 TCGA-XR-A8      | 74      | 693 hispanic cmale    | Dead  | MX |
| 52 TCGA-K7-A8      | 61 ' -- | not hisparmale        | Alive | MX |
| 53 TCGA-DD-A8      | 51 ' -- | not hisparfemale      | Alive | MO |
| 54 TCGA-ED-A7      | 29 ' -- | not hisparmale        | Alive | MO |
| 55 TCGA-DD-A8      | 69      | 195 not hisparmale    | Dead  | MO |
| 56 TCGA-ZP-A8      | 72 ' -- | not hisparmale        | Alive | MX |
| 57 TCGA-CC-A7      | 57      | 217 not hisparmale    | Dead  | MO |
| 58 TCGA-MI-A7      | 63 ' -- | not hisparmale        | Alive | MO |
| 59 TCGA-BC-A1      | 69      | 837 not hisparmale    | Dead  | MX |
| 60 TCGA-G3-A2      | 52      | 452 not hisparfemale  | Dead  | MO |
| 61 TCGA-CC-A8      | 48      | 272 not hisparmale    | Dead  | MO |
| 62 TCGA-DD-A7      | 68 ' -- | not hisparfemale      | Alive | MX |
| 63 TCGA-G3-A8      | 58 ' -- | not hisparmale        | Alive | MO |
| 64 TCGA-DD-A8      | 73 ' -- | not hisparfemale      | Alive | MO |
| 65 TCGA-MR-A8      | 58 ' -- | not hisparmale        | Alive | MX |
| 66 TCGA-G3-A7      | 60 ' -- | not hisparfemale      | Alive | MX |
| 67 TCGA-RC-A7      | 53 ' -- | not hisparmale        | Alive | MO |
| 68 TCGA-DD-A1      | 23      | 415 not hisparmale    | Dead  | MO |
| 69 TCGA-5R-A8      | 57 ' -- | not hisparmale        | Alive | MO |
| 70 TCGA-ED-A8      | 59 ' -- | not hisparfemale      | Alive | MO |
| 71 TCGA-2V-A8 ' -- | ' --    | not hisparmale        | Alive | MX |
| 72 TCGA-CC-A8      | 36      | 315 not hisparmale    | Dead  | MO |
| 73 TCGA-G3-A8      | 59 ' -- | not hisparmale        | Alive | MO |
| 74 TCGA-HP-A8      | 78      | 91 not reportmale     | Dead  | MO |
| 75 TCGA-RC-A8      | 74 ' -- | not hisparfemale      | Alive | MX |
| 76 TCGA-G3-A2      | 58 ' -- | not hisparmale        | Alive | MO |
| 77 TCGA-K7-A8      | 64 ' -- | not hisparmale        | Alive | MX |
| 78 TCGA-2Y-A8      | 51      | 1624 not hisparmale   | Dead  | MX |
| 79 TCGA-DD-A8      | 55 ' -- | not hisparmale        | Alive | MO |
| 80 TCGA-RC-A7      | 42 ' -- | not hisparmale        | Alive | MO |
| 81 TCGA-DD-A8      | 59 ' -- | not hisparmale        | Alive | MX |
| 82 TCGA-ED-A8      | 51      | 296 not hisparfemale  | Dead  | MO |
| 83 TCGA-DD-A8      | 40 ' -- | not hisparmale        | Alive | MO |
| 84 TCGA-DD-A8      | 72 ' -- | not hisparmale        | Alive | MO |
| 85 TCGA-ZP-A8      | 66 ' -- | not hisparfemale      | Alive | MX |
| 86 TCGA-2Y-A8      | 85      | 633 not hisparfemale  | Dead  | MX |
| 87 TCGA-DD-A8      | 76      | 2131 not hisparfemale | Dead  | MO |
| 88 TCGA-CC-A8      | 45      | 304 not hisparmale    | Dead  | MO |
| 89 TCGA-ZP-A8      | 67 ' -- | not hisparfemale      | Alive | MX |
| 90 TCGA-BC-A1      | 50      | 91 not hisparmale     | Dead  | MX |
| 91 TCGA-WX-A8      | 33      | 556 not hisparfemale  | Dead  | MX |
| 92 TCGA-G3-A8      | 61 ' -- | not hisparmale        | Alive | MO |
| 93 TCGA-G3-A8      | 53 ' -- | not hisparmale        | Alive | MO |
| 94 TCGA-DD-A1      | 46 ' -- | not hisparmale        | Alive | MO |
| 95 TCGA-DD-A8      | 52 ' -- | not hisparmale        | Alive | MO |
| 96 TCGA-DD-A8      | 55 ' -- | not hisparmale        | Alive | MO |
| 97 TCGA-DD-A8      | 50 ' -- | not hisparmale        | Alive | MO |
| 98 TCGA-G3-A7      | 65 ' -- | not hisparmale        | Alive | MX |
| 99 TCGA-DD-A8      | 66      | 107 not hisparfemale  | Dead  | MO |
| 100 TCGA-BC-A1     | 52      | 770 not hisparfemale  | Dead  | MX |
| 101 TCGA-FV-A8     | 38      | 366 not hisparfemale  | Dead  | MX |

|                |         |                       |       |    |
|----------------|---------|-----------------------|-------|----|
| 102 TCGA-2Y-A9 | 64      | 1271 not hisparmale   | Dead  | MX |
| 103 TCGA-DD-A9 | 69 ' -- | not hisparfemale      | Alive | MO |
| 104 TCGA-ZS-A9 | 55 ' -- | not hisparmale        | Alive | MX |
| 105 TCGA-DD-A4 | 65 ' -- | not hisparfemale      | Alive | MO |
| 106 TCGA-DD-A9 | 68 ' -- | not hisparfemale      | Alive | MO |
| 107 TCGA-DD-A9 | 53      | 425 not hisparmale    | Dead  | MO |
| 108 TCGA-DD-A9 | 66 ' -- | not hisparmale        | Alive | MO |
| 109 TCGA-DD-A9 | 48      | 381 not hisparmale    | Dead  | MO |
| 110 TCGA-NI-A8 | 74 ' -- | not hisparmale        | Alive | MX |
| 111 TCGA-ZP-A9 | 64 ' -- | not hisparfemale      | Alive | MX |
| 112 TCGA-DD-A9 | 72 ' -- | not hisparmale        | Alive | MO |
| 113 TCGA-DD-A3 | 43      | 601 not reportfemale  | Dead  | MO |
| 114 TCGA-DD-A9 | 66 ' -- | not hisparmale        | Alive | MO |
| 115 TCGA-EP-A2 | 52      | 627 not hisparfemale  | Dead  | MX |
| 116 TCGA-ZP-A9 | 56 ' -- | not hisparfemale      | Alive | MX |
| 117 TCGA-DD-A3 | 64      | 931 not hisparfemale  | Dead  | M1 |
| 118 TCGA-DD-A1 | 53      | 2542 not reportmale   | Dead  | MO |
| 119 TCGA-GJ-A9 | 68      | 67 not hisparmale     | Dead  | MX |
| 120 TCGA-DD-A9 | 63 ' -- | not hisparmale        | Alive | MO |
| 121 TCGA-ED-A7 | 48 ' -- | not hisparfemale      | Alive | MO |
| 122 TCGA-DD-A7 | 73 ' -- | not hisparfemale      | Alive | MO |
| 123 TCGA-5R-A9 | 65      | 46 not hisparfemale   | Dead  | MO |
| 124 TCGA-DD-A9 | 59 ' -- | not hisparmale        | Alive | MO |
| 125 TCGA-DD-A3 | 29      | 827 not hisparfemale  | Dead  | MO |
| 126 TCGA-WQ-A9 | 71 ' -- | not hisparfemale      | Alive | MO |
| 127 TCGA-2Y-A9 | 49 ' -- | hispanic cmale        | Alive | MO |
| 128 TCGA-DD-A9 | 72      | 16 not hisparmale     | Dead  | MO |
| 129 TCGA-KR-A7 | 57 ' -- | not reportmale        | Alive | MO |
| 130 TCGA-BC-A2 | 62 ' -- | not reportfemale      | Alive | MO |
| 131 TCGA-DD-A9 | 50 ' -- | not hisparmale        | Alive | MO |
| 132 TCGA-DD-A9 | 69 ' -- | not hisparmale        | Alive | MO |
| 133 TCGA-XR-A8 | 43 ' -- | hispanic cfemale      | Alive | MX |
| 134 TCGA-G3-A9 | 67 ' -- | not hisparmale        | Alive | MO |
| 135 TCGA-K7-A5 | 66 ' -- | not hisparmale        | Alive | MX |
| 136 TCGA-DD-A3 | 45      | 535 not hisparmale    | Dead  | MO |
| 137 TCGA-2Y-A9 | 59      | 555 not hisparfemale  | Dead  | MX |
| 138 TCGA-DD-A4 | 67 ' -- | not hisparmale        | Alive | MO |
| 139 TCGA-DD-A1 | 20 ' -- | not hisparfemale      | Alive | MO |
| 140 TCGA-DD-A1 | 71      | 1005 not hisparfemale | Dead  | MO |
| 141 TCGA-DD-A9 | 51 ' -- | not hisparmale        | Alive | MO |
| 142 TCGA-DD-A4 | 85      | 9 not hisparfemale    | Dead  | MO |
| 143 TCGA-CC-A7 | 47      | 299 not hisparmale    | Dead  | MO |
| 144 TCGA-WX-A9 | 64 ' -- | hispanic cfemale      | Alive | MX |
| 145 TCGA-DD-A7 | 72      | 283 hispanic cfemale  | Dead  | MO |
| 146 TCGA-MI-A7 | 61 ' -- | not hisparmale        | Alive | MX |
| 147 TCGA-ED-A4 | 47 ' -- | not hisparmale        | Alive | MO |
| 148 TCGA-DD-A9 | 51 ' -- | not hisparmale        | Alive | MO |
| 149 TCGA-DD-A9 | 69 ' -- | not hisparmale        | Alive | MO |
| 150 TCGA-BW-A5 | 26 ' -- | hispanic cfemale      | Alive | M1 |
| 151 TCGA-DD-A9 | 81      | 410 not hisparfemale  | Dead  | MX |
| 152 TCGA-XR-A8 | 49 ' -- | hispanic cfemale      | Alive | MO |

|                |         |                       |            |    |
|----------------|---------|-----------------------|------------|----|
| 153 TCGA-BC-A1 | 81      | 1423 not hisparmale   | Dead       | MX |
| 154 TCGA-T1-A6 | 68 '--- | not hisparmale        | Alive      | MO |
| 155 TCGA-KR-A7 | 65      | 65 not reportmale     | Dead       | MO |
| 156 TCGA-CC-A8 | 51      | 279 not hisparfemale  | Dead       | MO |
| 157 TCGA-DD-A4 | 80      | 1210 not hisparfemale | Dead       | MO |
| 158 TCGA-FV-A4 | 78      | 2486 not hisparmale   | Dead       | MO |
| 159 TCGA-BC-4C | 74      | 1490 not hisparfemale | Dead       | MO |
| 160 TCGA-G3-A# | 38 '--- | not hisparmale        | Alive      | MO |
| 161 TCGA-CC-A9 | 52 '--- | not hisparfemale      | Alive      | MO |
| 162 TCGA-DD-A# | 45 '--- | not hisparfemale      | Alive      | MO |
| 163 TCGA-DD-A# | 51 '--- | not hisparmale        | Alive      | MO |
| 164 TCGA-DD-A1 | 67 '--- | not hisparmale        | Not Report | MO |
| 165 TCGA-5C-A9 | 70 '--- | not hisparmale        | Alive      | MO |
| 166 TCGA-CC-A3 | 61      | 303 not hisparmale    | Dead       | MO |
| 167 TCGA-DD-A3 | 67      | 419 not reportmale    | Dead       | MO |
| 168 TCGA-CC-52 | 71      | 102 not hisparmale    | Dead       | MO |
| 169 TCGA-DD-A# | 58      | 12 not hisparmale     | Dead       | MO |
| 170 TCGA-DD-A# | 54 '--- | not hisparmale        | Alive      | MO |
| 171 TCGA-DD-A# | 68      | 365 not hisparmale    | Dead       | MO |
| 172 TCGA-WJ-A8 | 68 '--- | not hisparfemale      | Alive      | MX |
| 173 TCGA-BC-A1 | 76      | 711 not hisparmale    | Dead       | MX |
| 174 TCGA-DD-A1 | 73      | 349 not hisparmale    | Dead       | MO |
| 175 TCGA-FV-A4 | 52 '--- | not hisparmale        | Alive      | MO |
| 176 TCGA-DD-A1 | 40      | 223 not hisparmale    | Dead       | M1 |
| 177 TCGA-CC-A1 | 50      | 101 not hisparmale    | Dead       | MO |
| 178 TCGA-DD-A# | 43 '--- | not hisparmale        | Alive      | MO |
| 179 TCGA-DD-A1 | 72 '--- | not reportfemale      | Alive      | MO |
| 180 TCGA-DD-A3 | 75      | 11 not hisparmale     | Dead       | MO |
| 181 TCGA-CC-52 | 48      | 129 not hisparmale    | Dead       | MO |
| 182 TCGA-BC-A5 | 69      | 547 not hisparmale    | Dead       | MO |
| 183 TCGA-DD-A1 | 76      | 1372 not hisparmale   | Dead       | MO |
| 184 TCGA-DD-A# | 74 '--- | not hisparfemale      | Alive      | MO |
| 185 TCGA-BC-A2 | 75      | 1397 not reportfemale | Dead       | MO |
| 186 TCGA-G3-A# | 58 '--- | not hisparmale        | Alive      | MO |
| 187 TCGA-DD-A# | 51 '--- | not hisparmale        | Alive      | MO |
| 188 TCGA-BC-A1 | 62      | 34 not hisparfemale   | Dead       | MX |
| 189 TCGA-BC-A6 | 69 '--- | not reportmale        | Alive      | MO |
| 190 TCGA-DD-A# | 64      | 115 not hisparfemale  | Dead       | MO |
| 191 TCGA-RC-A7 | 66 '--- | not hisparmale        | Alive      | MO |
| 192 TCGA-EP-A2 | 62      | 19 not hisparmale     | Dead       | MX |
| 193 TCGA-ES-A2 | 80      | 688 not hisparmale    | Dead       | MX |
| 194 TCGA-CC-52 | 60 '--- | not hisparfemale      | Alive      | MO |
| 195 TCGA-2Y-A9 | 64      | 757 not hisparfemale  | Dead       | MX |
| 196 TCGA-BC-A3 | 68 '--- | not hisparfemale      | Alive      | MO |
| 197 TCGA-DD-A4 | 65 '--- | not hisparmale        | Alive      | MO |
| 198 TCGA-O8-A7 | 54 '--- | hispanic cmale        | Alive      | MX |
| 199 TCGA-BC-A6 | 64 '--- | not hisparmale        | Alive      | MO |
| 200 TCGA-DD-A7 | 65 '--- | not hisparfemale      | Alive      | MO |
| 201 TCGA-5C-A# | 61 '--- | not hisparmale        | Alive      | MO |
| 202 TCGA-DD-A# | 64 '--- | not hisparmale        | Alive      | MO |
| 203 TCGA-KR-A7 | 61 '--- | not reportfemale      | Alive      | MO |

|     |            |    |     |                      |       |    |
|-----|------------|----|-----|----------------------|-------|----|
| 204 | TCGA-ZS-A9 | 79 | '-- | not hisparfemale     | Alive | MX |
| 205 | TCGA-DD-A1 | 77 | '-- | not hisparfemale     | Alive | MO |
| 206 | TCGA-ES-A2 | 54 |     | 438 not hisparmale   | Dead  | MX |
| 207 | TCGA-CC-A5 | 63 |     | 347 not hisparmale   | Dead  | MO |
| 208 | TCGA-HP-A5 | 90 |     | 752 not reportfemale | Dead  | MO |
| 209 | TCGA-ED-A8 | 50 |     | 56 not hisparfemale  | Dead  | MO |
| 210 | TCGA-ZS-A9 | 64 | '-- | not hisparmale       | Alive | MX |
| 211 | TCGA-2Y-A9 | 68 | '-- | not hisparmale       | Alive | MX |
| 212 | TCGA-DD-A1 | 68 | '-- | not hisparmale       | Alive | MO |
| 213 | TCGA-DD-A1 | 38 | '-- | not hisparmale       | Alive | MO |
| 214 | TCGA-DD-A4 | 54 | '-- | not hisparfemale     | Alive | MO |
| 215 | TCGA-K7-A6 | 66 | '-- | not hisparmale       | Alive | MX |
| 216 | TCGA-DD-A1 | 39 | '-- | not hisparmale       | Alive | MO |
| 217 | TCGA-DD-A1 | 44 | '-- | not hisparmale       | Alive | MO |
| 218 | TCGA-MR-A8 | 34 | '-- | not reportmale       | Alive | MX |
| 219 | TCGA-G3-A7 | 76 | '-- | not hisparmale       | Alive | MX |
| 220 | TCGA-DD-A7 | 77 | '-- | not hisparfemale     | Alive | MO |
| 221 | TCGA-ED-A7 | 61 | '-- | not hisparmale       | Alive | MO |
| 222 | TCGA-ED-A9 | 54 | '-- | not hisparmale       | Alive | MO |
| 223 | TCGA-DD-A3 | 65 |     | 233 not reportmale   | Dead  | MO |
| 224 | TCGA-G3-A6 | 65 | '-- | not hisparmale       | Alive | MO |
| 225 | TCGA-DD-A1 | 59 | '-- | not hisparmale       | Alive | MO |
| 226 | TCGA-DD-A4 | 77 |     | 802 not hisparmale   | Dead  | MO |
| 227 | TCGA-DD-A1 | 58 | '-- | not hisparmale       | Alive | MO |
| 228 | TCGA-DD-A1 | 70 | '-- | not hisparmale       | Alive | MO |
| 229 | TCGA-G3-A3 | 80 | '-- | not hisparmale       | Alive | MO |
| 230 | TCGA-BC-A1 | 76 |     | 837 not hisparmale   | Dead  | MX |
| 231 | TCGA-FV-A4 | 84 | '-- | not hisparfemale     | Alive | MO |
| 232 | TCGA-LG-A9 | 48 | '-- | not hisparmale       | Alive | MO |
| 233 | TCGA-DD-A4 | 61 | '-- | not hisparmale       | Alive | MO |
| 234 | TCGA-DD-A1 | 53 | '-- | not hisparmale       | Alive | MO |
| 235 | TCGA-CC-A3 | 45 |     | 300 not hisparmale   | Dead  | MO |
| 236 | TCGA-UB-A7 | 56 |     | 214 not hisparmale   | Dead  | MX |
| 237 | TCGA-DD-A1 | 56 | '-- | not hisparmale       | Alive | MO |
| 238 | TCGA-ZP-A9 | 59 |     | 1088 not hisparmale  | Dead  | MX |
| 239 | TCGA-ZS-A9 | 73 |     | 1386 not hisparmale  | Dead  | MX |
| 240 | TCGA-4R-A1 | 66 |     | 262 not hisparmale   | Dead  | MX |
| 241 | TCGA-DD-A1 | 75 | '-- | not hisparmale       | Alive | MO |
| 242 | TCGA-BD-A3 | 62 | '-- | not hisparmale       | Alive | MX |
| 243 | TCGA-LG-A9 | 68 | '-- | hispanic cmale       | Alive | MO |
| 244 | TCGA-3K-A1 | 65 | '-- | not hisparmale       | Alive | MX |
| 245 | TCGA-CC-A8 | 74 |     | 140 not hisparmale   | Dead  | MO |
| 246 | TCGA-EP-A1 | 62 | '-- | not hisparmale       | Alive | MX |
| 247 | TCGA-2Y-A9 | 58 |     | 724 hispanic cmale   | Dead  | MX |
| 248 | TCGA-DD-A1 | 45 | '-- | not hisparmale       | Alive | MO |
| 249 | TCGA-DD-A1 | 43 | '-- | not hisparfemale     | Alive | MO |
| 250 | TCGA-DD-A1 | 68 |     | 1622 not hisparmale  | Dead  | MO |
| 251 | TCGA-G3-A5 | 70 | '-- | not hisparmale       | Alive | MO |
| 252 | TCGA-NI-A4 | 71 |     | 1791 not hisparmale  | Dead  | MX |
| 253 | TCGA-2Y-A9 | 45 | '-- | hispanic cmale       | Alive | MX |
| 254 | TCGA-2Y-A9 | 58 |     | 1229 not hisparmale  | Dead  | MX |

|     |            |    |     |                       |       |    |
|-----|------------|----|-----|-----------------------|-------|----|
| 255 | TCGA-DD-A7 | 55 | '-- | not hisparmale        | Alive | MO |
| 256 | TCGA-DD-A7 | 56 | '-- | not hisparmale        | Alive | MO |
| 257 | TCGA-EP-A2 | 76 | '-- | not hisparmale        | Alive | MX |
| 258 | TCGA-2Y-A9 | 70 |     | 36 not hisparmale     | Dead  | MX |
| 259 | TCGA-BC-A1 | 80 |     | 153 not hisparmale    | Dead  | MX |
| 260 | TCGA-ED-A7 | 20 | '-- | not hisparfemale      | Alive | MO |
| 261 | TCGA-ED-A6 | 74 | '-- | not hisparmale        | Alive | MO |
| 262 | TCGA-DD-A1 | 64 |     | 558 not hisparfemale  | Dead  | M1 |
| 263 | TCGA-DD-A7 | 59 | '-- | not hisparfemale      | Alive | MO |
| 264 | TCGA-RC-A6 | 75 | '-- | not hisparmale        | Alive | MO |
| 265 | TCGA-G3-A7 | 53 |     | 65 not hisparfemale   | Dead  | MO |
| 266 | TCGA-DD-A4 | 61 |     | 2456 not hisparfemale | Dead  | MO |
| 267 | TCGA-CC-52 | 35 |     | 129 not hisparmale    | Dead  | MO |
| 268 | TCGA-MI-A7 | 64 | '-- | not hisparmale        | Alive | MO |
| 269 | TCGA-DD-A7 | 58 | '-- | not hisparmale        | Alive | MO |
| 270 | TCGA-FV-A2 | 76 | '-- | not hisparfemale      | Alive | MO |
| 271 | TCGA-ED-A8 | 60 | '-- | not hisparfemale      | Alive | MO |
| 272 | TCGA-CC-A7 | 54 | '-- | not hisparmale        | Alive | MO |
| 273 | TCGA-DD-A2 | 37 |     | 612 not hisparmale    | Dead  | MO |
| 274 | TCGA-DD-A7 | 62 | '-- | not hisparmale        | Alive | MO |
| 275 | TCGA-DD-A7 | 51 | '-- | not hisparmale        | Alive | MO |
| 276 | TCGA-RC-A7 | 59 | '-- | not hisparmale        | Alive | MO |
| 277 | TCGA-DD-A7 | 65 | '-- | not hisparmale        | Alive | MO |
| 278 | TCGA-UB-A7 | 60 | '-- | not hisparmale        | Alive | MX |
| 279 | TCGA-DD-A1 | 55 | '-- | not hisparfemale      | Alive | MO |
| 280 | TCGA-UB-A7 | 24 | '-- | not hisparmale        | Alive | MX |
| 281 | TCGA-DD-A7 | 38 | '-- | not hisparmale        | Alive | MO |
| 282 | TCGA-QA-A7 | 48 | '-- | not hisparmale        | Alive | MX |
| 283 | TCGA-2Y-A9 | 66 | '-- | hispanic cmale        | Alive | MX |
| 284 | TCGA-2Y-A9 | 55 | '-- | not hisparfemale      | Alive | MX |
| 285 | TCGA-DD-A7 | 51 | '-- | not hisparmale        | Alive | MO |
| 286 | TCGA-G3-A2 | 71 | '-- | not hisparmale        | Alive | MO |
| 287 | TCGA-CC-A7 | 61 |     | 278 not hisparmale    | Dead  | MO |
| 288 | TCGA-DD-A7 | 52 |     | 469 not hisparmale    | Dead  | MO |
| 289 | TCGA-DD-A7 | 71 | '-- | not hisparmale        | Alive | MO |
| 290 | TCGA-ED-A6 | 35 | '-- | not hisparmale        | Alive | MO |
| 291 | TCGA-EP-A2 | 70 | '-- | not hisparmale        | Alive | MX |
| 292 | TCGA-G3-A2 | 64 |     | 416 not hisparmale    | Dead  | MO |
| 293 | TCGA-DD-A4 | 56 |     | 899 not hisparfemale  | Dead  | MO |
| 294 | TCGA-G3-A2 | 63 | '-- | not hisparfemale      | Alive | MO |
| 295 | TCGA-YA-A8 | 68 |     | 412 hispanic cmale    | Dead  | MX |
| 296 | TCGA-2Y-A9 | 68 | '-- | not hisparfemale      | Alive | MX |
| 297 | TCGA-DD-A4 | 75 |     | 660 hispanic cfemale  | Dead  | MO |
| 298 | TCGA-FV-A4 | 51 | '-- | not hisparfemale      | Alive | MO |
| 299 | TCGA-DD-A7 | 59 | '-- | not hisparfemale      | Alive | MO |
| 300 | TCGA-UB-A7 | 51 | '-- | not hisparmale        | Alive | MX |
| 301 | TCGA-DD-A2 | 67 |     | 171 not hisparmale    | Dead  | MO |
| 302 | TCGA-DD-A4 | 67 | '-- | not hisparfemale      | Alive | MO |
| 303 | TCGA-FV-A2 | 81 |     | 247 not hisparfemale  | Dead  | MX |
| 304 | TCGA-DD-A4 | 60 |     | 373 hispanic cmale    | Dead  | MO |
| 305 | TCGA-DD-A4 | 56 | '-- | not hisparfemale      | Alive | MO |

|                |         |                       |       |    |
|----------------|---------|-----------------------|-------|----|
| 306 TCGA-DD-A  | 56 ' -- | not hisparmale        | Alive | MO |
| 307 TCGA-UB-A7 | 67      | 52 not hisparmale     | Dead  | MX |
| 308 TCGA-DD-A  | 72      | 3258 not hisparfemale | Dead  | MO |
| 309 TCGA-CC-A  | 57 ' -- | not hisparmale        | Alive | MO |
| 310 TCGA-ED-A4 | 58 ' -- | not hisparmale        | Alive | MO |
| 311 TCGA-LG-A  | 79 ' -- | not hisparfemale      | Alive | MO |
| 312 TCGA-RC-A  | 24 ' -- | not reportmale        | Alive | MO |
| 313 TCGA-DD-A  | 49 ' -- | not hisparfemale      | Alive | MO |
| 314 TCGA-BW-A  | 63 ' -- | not hisparmale        | Alive | MX |
| 315 TCGA-FV-A  | 70      | 1852 not hisparfemale | Dead  | MO |
| 316 TCGA-CC-5  | 61      | 87 not hisparfemale   | Dead  | MO |
| 317 TCGA-DD-A1 | 23 ' -- | not hisparmale        | Alive | MO |
| 318 TCGA-G3-A  | 52 ' -- | not hisparmale        | Alive | MO |
| 319 TCGA-ZP-A  | 51      | 765 not hisparmale    | Dead  | MX |
| 320 TCGA-ED-A7 | 53 ' -- | not hisparfemale      | Alive | MO |
| 321 TCGA-DD-A  | 63      | 171 not hisparfemale  | Dead  | MO |
| 322 TCGA-ED-A  | 60 ' -- | not hisparfemale      | Alive | MO |
| 323 TCGA-BC-A1 | 51      | 2116 not hisparfemale | Dead  | MX |
| 324 TCGA-DD-A  | 60 ' -- | not hisparmale        | Alive | MO |
| 325 TCGA-2Y-A  | 64 ' -- | not hisparfemale      | Alive | MX |
| 326 TCGA-CC-A  | 18      | 300 not hisparmale    | Dead  | MO |
| 327 TCGA-2Y-A  | 54      | 2532 not hisparfemale | Dead  | MX |
| 328 TCGA-G3-A  | 58 ' -- | not hisparmale        | Alive | MO |
| 329 TCGA-FV-A  | 75      | 581 not hisparmale    | Dead  | MO |
| 330 TCGA-5R-A  | 17 ' -- | not hisparfemale      | Alive | MO |
| 331 TCGA-RC-A  | 20 ' -- | not reportfemale      | Alive | MO |
| 332 TCGA-WQ-A  | 62 ' -- | not hisparmale        | Alive | MO |
| 333 TCGA-DD-A  | 65 ' -- | not hisparmale        | Alive | MO |
| 334 TCGA-FV-A  | 80 ' -- | not hisparmale        | Alive | MX |
| 335 TCGA-2Y-A  | 68 ' -- | not hisparmale        | Alive | MX |
| 336 TCGA-G3-A  | 48 ' -- | hispanic cmale        | Alive | MO |
| 337 TCGA-DD-A  | 70 ' -- | not hisparmale        | Alive | MO |
| 338 TCGA-DD-A  | 66      | 3125 not hisparfemale | Dead  | MO |
| 339 TCGA-DD-A  | 61 ' -- | not hisparmale        | Alive | MO |
| 340 TCGA-DD-A  | 77      | 643 not hisparmale    | Dead  | MO |
| 341 TCGA-BD-A  | 75 ' -- | not hisparfemale      | Alive | MO |
| 342 TCGA-BC-A1 | 72      | 1135 not hisparfemale | Dead  | MX |
| 343 TCGA-DD-A4 | 46 ' -- | not hisparmale        | Alive | MO |
| 344 TCGA-CC-A7 | 59      | 649 not hisparmale    | Dead  | MO |
| 345 TCGA-DD-A7 | 66 ' -- | not hisparmale        | Alive | MO |
| 346 TCGA-CC-A1 | 24 ' -- | not hisparfemale      | Alive | MO |
| 347 TCGA-DD-A  | 55 ' -- | not hisparfemale      | Alive | MO |
| 348 TCGA-CC-A7 | 58 ' -- | not hisparmale        | Alive | MO |
| 349 TCGA-DD-A  | 66 ' -- | not hisparfemale      | Alive | MO |
| 350 TCGA-CC-A7 | 56 ' -- | not hisparmale        | Alive | MO |
| 351 TCGA-DD-A  | 69 ' -- | not hisparmale        | Alive | MO |
| 352 TCGA-UB-A  | 69 ' -- | not hisparfemale      | Alive | MX |
| 353 TCGA-CC-A7 | 59      | 262 not hisparmale    | Dead  | MO |
| 354 TCGA-XR-A  | 16 ' -- | hispanic cmale        | Alive | MX |
| 355 TCGA-DD-A  | 61      | 1685 not hisparmale   | Dead  | MO |
| 356 TCGA-BW-A  | 50 ' -- | not hisparmale        | Alive | MX |

|                            |         |                    |       |    |
|----------------------------|---------|--------------------|-------|----|
| 357 TCGA-G3-A <sup>1</sup> | 51      | 359 not hisparmale | Dead  | M0 |
| 358 TCGA-2Y-A <sup>9</sup> | 70 ' -- | not hisparmale     | Alive | MX |
| 359 TCGA-G3-A <sup>1</sup> | 58 ' -- | not hisparfemale   | Alive | M0 |
| 360 TCGA-DD-A <sup>1</sup> | 60 ' -- | not hisparmale     | Alive | M0 |
| 361 TCGA-EP-A <sup>3</sup> | 73 ' -- | not hisparmale     | Alive | MX |
| 362 TCGA-MI-A <sup>7</sup> | 77 ' -- | not hisparmale     | Alive | MX |
| 363 TCGA-G3-A <sup>2</sup> | 68 ' -- | not hisparmale     | Alive | M0 |
| 364 TCGA-BC-A <sup>8</sup> | 66 ' -- | not hisparfemale   | Alive | M0 |
| 365 TCGA-RC-A <sup>7</sup> | 47 ' -- | not hisparfemale   | Alive | M0 |
| 366 TCGA-CC-A <sup>9</sup> | 55 ' -- | not hisparmale     | Alive | M0 |
| 367 TCGA-G3-A <sup>2</sup> | 45 ' -- | not hisparfemale   | Alive | M0 |
| 368 TCGA-UB-A <sup>7</sup> | 59 ' -- | not hisparmale     | Alive | MX |
| 369 TCGA-GJ-A <sup>3</sup> | 59 ' -- | not hisparmale     | Alive | MX |
| 370 TCGA-DD-A <sup>1</sup> | 73 ' -- | not hisparmale     | Alive | M0 |
| 371 TCGA-KR-A <sup>7</sup> | 64 ' -- | not reportmale     | Alive | M0 |



| ajcc_pathc | ajcc_pathc | days_to_la | primary_dip | prior_mali    | prior_treat | tumor_sta  | treatment_ |
|------------|------------|------------|-------------|---------------|-------------|------------|------------|
| NO         | Stage I    | T1         | 2752        | Hepatocellno  | No          | stage i    |            |
| NO         | Stage I    | T1         | 3308        | Hepatocellno  | No          | stage i    |            |
| NO         | Stage III  | T3         | 849         | Hepatocellno  | No          | stage iii  | a          |
| NO         | Stage III  | T4         | 507         | Hepatocellno  | No          | stage iii  | c          |
| NX         | Stage I    | T1         | 430         | Hepatocellno  | No          | stage i    |            |
| NO         | Stage I    | T1         | 662         | Hepatocellno  | No          | stage i    |            |
| NO         | Stage III  | T3         | 248         | Hepatocellno  | No          | stage iii  | a          |
| NO         | Stage III  | T3         | 363         | Hepatocellno  | No          | stage iii  | a          |
| '--        | Stage II   | T2         | '--         | Hepatocellno  | No          | stage ii   |            |
| NX         | Stage II   | T2         | 756         | Hepatocellno  | No          | stage ii   |            |
| NO         | Stage I    | T1         | 1855        | Hepatocellno  | No          | stage i    |            |
| NO         | Stage I    | T1         | 658         | Hepatocellno  | No          | stage i    |            |
| NO         | Stage II   | T2         | 328         | Hepatocellno  | No          | stage ii   |            |
| NX         | Stage I    | T1         | 8           | Hepatocellno  | No          | stage i    |            |
| NO         | Stage II   | T2         | 1779        | Hepatocellno  | No          | stage ii   |            |
| NO         | Stage II   | T2         | 1098        | Hepatocellno  | No          | stage ii   |            |
| NO         | Stage I    | T1         | '--         | Hepatocellno  | No          | stage i    |            |
| NO         | Stage I    | T1         | 137         | Hepatocellno  | No          | stage i    |            |
| NO         | Stage I    | T1         | 1302        | Hepatocellno  | No          | stage i    |            |
| NX         | '--        | T3         | '--         | Hepatocellno  | No          | not report |            |
| NX         | Stage I    | T1         | '--         | Hepatocellno  | No          | stage i    |            |
| NO         | Stage I    | T1         | 1295        | Hepatocellno  | No          | stage i    |            |
| NX         | Stage II   | T2         | '--         | Hepatocellno  | No          | stage ii   |            |
| NO         | Stage I    | T1         | '--         | Hepatocellno  | No          | stage i    |            |
| NO         | Stage II   | T2         | 429         | Hepatocellno  | No          | stage ii   |            |
| NO         | Stage I    | T1         | 2301        | Hepatocellno  | No          | stage i    |            |
| NO         | Stage II   | T2b        | 848         | Combined lno  | No          | stage ii   |            |
| NO         | Stage I    | T1         | 942         | Hepatocellno  | No          | stage i    |            |
| NO         | Stage I    | T1         | 2015        | Hepatocellno  | No          | stage i    |            |
| NX         | Stage III  | T3b        | '--         | Hepatocellyes | No          | stage iii  | t          |
| NO         | Stage I    | T1         | 2317        | Hepatocellno  | No          | stage i    |            |
| NO         | Stage I    | T1         | 1900        | Hepatocellno  | No          | stage i    |            |
| NX         | '--        | T2         | 1363        | Hepatocellno  | No          | not report |            |
| NO         | Stage II   | T2         | 447         | Hepatocellno  | No          | stage ii   |            |
| NO         | Stage II   | T2         | 2202        | Hepatocellno  | No          | stage ii   |            |
| NO         | Stage I    | T1         | 372         | Hepatocellno  | No          | stage i    |            |
| NX         | Stage I    | T1         | '--         | Hepatocellyes | No          | stage i    |            |
| NO         | Stage I    | T1         | 1168        | Hepatocellyes | No          | stage i    |            |
| NX         | Stage I    | T1         | 334         | Hepatocellno  | No          | stage i    |            |
| NO         | Stage III  | T3         | 0           | Hepatocellno  | No          | stage iii  | a          |
| NO         | Stage I    | T1         | 989         | Hepatocellno  | No          | stage i    |            |
| NO         | Stage III  | T4         | '--         | Hepatocellno  | No          | stage iii  | t          |
| NO         | Stage II   | T2         | 12          | Hepatocellno  | No          | stage ii   |            |
| NO         | Stage I    | T1         | '--         | Hepatocellno  | No          | stage i    |            |
| NX         | Stage II   | T2         | '--         | Hepatocellno  | No          | stage ii   |            |
| NO         | Stage III  | T4         | 0           | Hepatocellno  | No          | stage iii  | c          |
| NO         | Stage I    | T1         | 587         | Hepatocellno  | No          | stage i    |            |
| NO         | Stage I    | T1         | '--         | Hepatocellno  | No          | stage i    |            |
| NX         | Stage I    | T1         | 898         | Hepatocellyes | No          | stage i    |            |
| NO         | Stage I    | T1         | 1066        | Hepatocellno  | No          | stage i    |            |

|    |           |     |     |                   |    |            |
|----|-----------|-----|-----|-------------------|----|------------|
| NX | Stage I   | T1  | '-- | Hepatocellno      | No | stage i    |
| NX | Stage II  | T2a |     | 359 Combined hno  | No | stage ii   |
| NO | Stage I   | T1  |     | 564 Hepatocellno  | No | stage i    |
| NO | Stage III | T3a |     | 427 Hepatocellno  | No | stage iiiæ |
| NO | Stage II  | T2  | '-- | Hepatocellno      | No | stage ii   |
| NX | '--       | T1  |     | 706 Hepatocellno  | No | not report |
| NO | Stage III | T3  |     | 0 Hepatocellno    | No | stage iiiæ |
| NO | Stage II  | T2  |     | 698 Hepatocellno  | No | stage ii   |
| NX | '--       | T2  | '-- | Hepatocellno      | No | not report |
| NO | Stage I   | T1  | '-- | Hepatocellno      | No | stage i    |
| NO | Stage III | T4  |     | 0 Hepatocellno    | No | stage iiit |
| NX | Stage II  | T2  |     | 693 Hepatocellno  | No | stage ii   |
| NX | Stage I   | T1  |     | 744 Hepatocellno  | No | stage i    |
| NO | Stage I   | T1  |     | 1219 Hepatocellno | No | stage i    |
| NX | Stage I   | T1  |     | 229 Hepatocellno  | No | stage i    |
| NX | Stage I   | T1  |     | 632 Hepatocellno  | No | stage i    |
| NO | Stage II  | T2  |     | 588 Hepatocellno  | No | stage ii   |
| NO | Stage II  | T2  | '-- | Hepatocellno      | No | stage ii   |
| NO | Stage II  | T2  |     | 520 Hepatocellno  | No | stage ii   |
| NO | Stage III | T3a |     | 406 Hepatocellno  | No | stage iiiæ |
| NX | Stage II  | T2  | '-- | Hepatocellno      | No | stage ii   |
| NO | Stage III | T3  |     | 3 Hepatocellno    | No | stage iiiæ |
| NX | Stage I   | T1  |     | 698 Hepatocellno  | No | stage i    |
| NX | Stage I   | T1  | '-- | Hepatocellno      | No | stage i    |
| NX | Stage III | T3  |     | 22 Hepatocellno   | No | stage iiiæ |
| NO | Stage I   | T1  |     | 655 Hepatocellno  | No | stage i    |
| NX | Stage I   | T1  |     | 631 Hepatocellno  | No | stage i    |
| NX | Stage I   | T1  | '-- | Hepatocellno      | No | stage i    |
| NO | Stage III | T3  |     | 1989 Hepatocellno | No | stage iiiæ |
| NO | Stage II  | T2  |     | 468 Hepatocellno  | No | stage ii   |
| NX | Stage I   | T1  |     | 898 Hepatocellno  | No | stage i    |
| NO | Stage III | T3a |     | 7 Hepatocellno    | No | stage iiiæ |
| NO | Stage I   | T1  |     | 1876 Hepatocellno | No | stage i    |
| NO | Stage I   | T1  |     | 1531 Hepatocellno | No | stage i    |
| NX | '--       | T1  |     | 782 Hepatocellno  | No | not report |
| NX | '--       | T1  | '-- | Hepatocellno      | No | not report |
| NO | Stage I   | T1  | '-- | Hepatocellno      | No | stage i    |
| NO | Stage III | T3  |     | 0 Hepatocellno    | No | stage iiiæ |
| NX | '--       | T1  |     | 1091 Hepatocellno | No | not report |
| NX | '--       | T4  | '-- | Hepatocellno      | No | not report |
| NX | Stage III | T3a | '-- | Hepatocellno      | No | stage iiiæ |
| NO | Stage I   | T1  |     | 585 Hepatocellno  | No | stage i    |
| NO | Stage III | T3a |     | 780 Hepatocellno  | No | stage iiiæ |
| NO | Stage I   | T1  |     | 183 Hepatocellno  | No | stage i    |
| NO | Stage I   | T1  |     | 552 Hepatocellno  | No | stage i    |
| NO | Stage I   | T1  |     | 810 Hepatocellno  | No | stage i    |
| NO | Stage I   | T1  |     | 566 Hepatocellno  | No | stage i    |
| NX | Stage I   | T1  |     | 361 Hepatocellno  | No | stage i    |
| NO | Stage I   | T1  |     | 58 Hepatocellno   | No | stage i    |
| NO | Stage III | T3a | '-- | Hepatocellno      | No | stage iiiæ |
| NX | Stage I   | T1  |     | 4 Hepatocellno    | No | stage i    |

|    |           |     |     |                    |     |            |
|----|-----------|-----|-----|--------------------|-----|------------|
| NO | Stage I   | T1  | '-- | Hepatocellno       | No  | stage i    |
| NO | Stage I   | T1  |     | 1562 Hepatocellno  | No  | stage i    |
| NX | Stage II  | T2  |     | 341 Hepatocellno   | No  | stage ii   |
| NO | Stage III | T3b |     | 917 Hepatocellno   | No  | stage iiit |
| NO | Stage II  | T2  |     | 1049 Hepatocellno  | No  | stage ii   |
| NO | Stage I   | T1  | '-- | Hepatocellno       | No  | stage i    |
| NO | Stage III | T3a |     | 672 Hepatocellno   | No  | stage iiia |
| NO | Stage I   | T1  | '-- | Hepatocellno       | No  | stage i    |
| NX | Stage I   | T1  |     | 799 Hepatocellno   | No  | stage i    |
| NX | '--       | T1  |     | 395 Hepatocellno   | No  | not report |
| NO | Stage I   | T1  |     | 644 Hepatocellyes  | No  | stage i    |
| NX | Stage II  | T2  | '-- | Hepatocellno       | No  | stage ii   |
| NO | Stage II  | T2  |     | 170 Hepatocellno   | No  | stage ii   |
| NX | Stage III | T3a |     | 357 Hepatocellno   | No  | stage iiia |
| NX | '--       | T1  |     | 21 Hepatocellyes   | No  | not report |
| NO | Stage IV  | T4  | '-- | Hepatocellno       | No  | stage ivb  |
| NO | Stage III | T3  | '-- | Hepatocellno       | No  | stage iiia |
| NO | Stage I   | T1  | '-- | Hepatocellno       | No  | stage i    |
| NO | Stage I   | T1  |     | 474 Hepatocellno   | No  | stage i    |
| NX | Stage II  | T2  |     | 6 Hepatocellno     | No  | stage ii   |
| NO | Stage I   | T1  |     | 3478 Hepatocellno  | No  | stage i    |
| NO | Stage II  | T2  | '-- | Hepatocellno       | No  | stage ii   |
| NO | Stage II  | T2  |     | 436 Hepatocellno   | No  | stage ii   |
| NO | Stage III | T3  | '-- | Hepatocellno       | No  | stage iii  |
| NX | '--       | T3a |     | 30 Hepatocellno    | No  | not report |
| NO | Stage III | T3  |     | 3675 Hepatocellno  | No  | stage iiia |
| NO | Stage I   | T1  | '-- | Hepatocellno       | No  | stage i    |
| NO | Stage I   | T1  |     | 906 Hepatocellno   | No  | stage i    |
| NX | Stage III | T3  |     | 1351 Hepatocellno  | No  | stage iiia |
| NO | Stage I   | T1  |     | 574 Hepatocellyes  | No  | stage i    |
| NO | Stage I   | T1  |     | 722 Hepatocellno   | No  | stage i    |
| NX | Stage I   | T1  |     | 1339 Hepatocellyes | Yes | stage i    |
| NO | Stage II  | T2  |     | 354 Hepatocellno   | No  | stage ii   |
| NX | Stage I   | T1  |     | 519 Hepatocellno   | No  | stage i    |
| NO | Stage I   | T1  | '-- | Hepatocellno       | No  | stage i    |
| NO | Stage I   | T1  | '-- | Hepatocellno       | No  | stage i    |
| NX | Stage II  | T2  |     | 816 Hepatocellyes  | No  | stage ii   |
| NO | Stage I   | T1  |     | 602 Hepatocellno   | No  | stage i    |
| N1 | Stage III | T1  |     | 887 Hepatocellno   | No  | stage iiic |
| NO | Stage I   | T1  |     | 763 Hepatocellno   | No  | stage i    |
| NO | Stage I   | T1  | '-- | Hepatocellno       | No  | stage i    |
| NO | Stage II  | T2  |     | 0 Hepatocellno     | No  | stage ii   |
| NX | Stage I   | T1  |     | 615 Hepatocellno   | No  | stage i    |
| NO | Stage I   | T1  | '-- | Hepatocellno       | No  | stage i    |
| NX | '--       | T2  |     | 630 Hepatocellno   | No  | not report |
| NO | Stage II  | T2  |     | 910 Hepatocellno   | No  | stage ii   |
| NO | Stage I   | T1  |     | 638 Hepatocellno   | No  | stage i    |
| NO | Stage I   | T1  |     | 1633 Hepatocellno  | No  | stage i    |
| NO | Stage IV  | T2  |     | 0 Hepatocellno     | No  | stage iv   |
| NO | Stage I   | T1  | '-- | Combined kno       | No  | stage i    |
| NO | Stage III | T3  |     | 1030 Hepatocellno  | No  | stage iiit |

|    |               |     |      |                    |    |            |
|----|---------------|-----|------|--------------------|----|------------|
| NX | ' --          | T3  | ' -- | Hepatocellno       | No | not report |
| NX | ' --          | T1  |      | 23 Hepatocellyes   | No | not report |
| NO | Stage I       | T1  | ' -- | Hepatocellyes      | No | stage i    |
| NO | Stage II      | T2  |      | 0 Hepatocellno     | No | stage ii   |
| NO | Stage III/T3  |     | ' -- | Hepatocellno       | No | stage iiiæ |
| NX | Stage III/T3  |     |      | 1836 Hepatocellyes | No | stage iiiæ |
| NO | Stage III/T3  |     | ' -- | Hepatocellno       | No | stage iiiæ |
| NO | Stage II      | T2  |      | 361 Hepatocellno   | No | stage ii   |
| NO | Stage III/T3a |     |      | 0 Hepatocellno     | No | stage iiiæ |
| NO | Stage III/T3a |     |      | 555 Hepatocellno   | No | stage iiiæ |
| NO | Stage I       | T1  |      | 1242 Hepatocellno  | No | stage i    |
| NO | Stage I       | T1  |      | 79 Hepatocellno    | No | stage i    |
| NO | Stage I       | T1  |      | 322 Hepatocellno   | No | stage i    |
| NO | Stage III/T3  |     |      | 2 Hepatocellno     | No | stage iiiæ |
| NO | Stage III/T3b |     | ' -- | Hepatocellno       | No | stage iiiæ |
| NO | Stage III/T3  |     |      | 0 Hepatocellno     | No | stage iiiæ |
| NO | Stage II      | T2  | ' -- | Hepatocellno       | No | stage ii   |
| NO | Stage I       | T1  |      | 1345 Hepatocellno  | No | stage i    |
| NO | Stage I       | T1  | ' -- | Hepatocellno       | No | stage i    |
| NX | Stage I       | T1  |      | 345 Clear cellno   | No | stage i    |
| NX | ' --          | T4  | ' -- | Hepatocellno       | No | not report |
| NO | Stage III/T3  |     |      | 204 Hepatocellno   | No | stage iiiæ |
| NX | Stage I       | T1  |      | 12 Hepatocellno    | No | stage i    |
| NO | Stage IV      | T3a | ' -- | Hepatocellno       | No | stage iv   |
| NO | Stage III/T3  |     |      | 0 Hepatocellno     | No | stage iiiæ |
| NO | Stage I       | T1  |      | 1424 Hepatocellno  | No | stage i    |
| NO | Stage I       | T1  |      | 2017 Hepatocellno  | No | stage i    |
| NO | Stage II      | T2  | ' -- | Hepatocellyes      | No | stage ii   |
| NO | Stage II      | T2  |      | 0 Hepatocellno     | No | stage ii   |
| NX | Stage III/T3a |     |      | 289 Hepatocellyes  | No | stage iiiæ |
| NO | Stage I       | T1  | ' -- | Hepatocellno       | No | stage i    |
| NO | Stage I       | T1  |      | 2324 Hepatocellno  | No | stage i    |
| NX | Stage II      | T2  |      | 421 Hepatocellno   | No | stage ii   |
| NO | Stage I       | T1  |      | 476 Hepatocellno   | No | stage i    |
| NO | Stage II      | T2  |      | 1067 Hepatocellno  | No | stage ii   |
| NO | Stage I       | T1  | ' -- | Hepatocellno       | No | stage i    |
| NO | Stage I       | T1  |      | 387 Hepatocellno   | No | stage i    |
| NO | Stage I       | T1  | ' -- | Hepatocellno       | No | stage i    |
| NO | Stage I       | T1  |      | 579 Hepatocellno   | No | stage i    |
| NX | Stage I       | T1  | ' -- | Hepatocellno       | No | stage i    |
| NX | Stage I       | T1  | ' -- | Hepatocellyes      | No | stage i    |
| NO | Stage III/T4  |     |      | 250 Hepatocellno   | No | stage iiic |
| NX | Stage II      | T2  | ' -- | Hepatocellno       | No | stage ii   |
| NO | Stage II      | T2  |      | 680 Hepatocellno   | No | stage ii   |
| NO | Stage I       | T1  |      | 2245 Hepatocellno  | No | stage i    |
| NX | Stage I       | T1  |      | 538 Hepatocellno   | No | stage i    |
| NX | Stage II      | T2  |      | 444 Hepatocellno   | No | stage ii   |
| NO | Stage III/T3a |     |      | 701 Hepatocellno   | No | stage iiiæ |
| NO | Stage II      | T2  |      | 20 Combined kno    | No | stage ii   |
| NO | Stage I       | T1  |      | 415 Hepatocellno   | No | stage i    |
| NO | Stage II      | T2  |      | 951 Hepatocellyes  | No | stage ii   |

|    |               |     |                    |     |            |
|----|---------------|-----|--------------------|-----|------------|
| NX | Stage II T2   |     | 1241 Hepatocellyes | No  | stage ii   |
| NO | Stage II T2   |     | 3437 Hepatocellno  | No  | stage ii   |
| NX | Stage I T1    | '-- | Hepatocellno       | No  | stage i    |
| NO | Stage III/T3  |     | 0 Hepatocellno     | No  | stage iiiæ |
| NX | '-- TX        | '-- | Hepatocellno       | No  | not report |
| NO | Stage III/T3a |     | 6 Hepatocellno     | No  | stage iiiæ |
| NX | Stage II T2   |     | 2412 Hepatocellno  | No  | stage ii   |
| NO | Stage I T1    |     | 1452 Hepatocellno  | No  | stage i    |
| NO | Stage II T2   |     | 2415 Hepatocellno  | No  | stage ii   |
| NO | Stage I T1    |     | 2728 Hepatocellno  | No  | stage i    |
| NO | Stage II T2   |     | 928 Hepatocellno   | No  | stage ii   |
| NO | Stage I T1    |     | 512 Hepatocellno   | No  | stage i    |
| NO | Stage I T1    |     | 1804 Hepatocellno  | No  | stage i    |
| NO | Stage I T1    |     | 2513 Hepatocellno  | No  | stage i    |
| NO | Stage I T1    |     | 330 Hepatocellno   | No  | stage i    |
| NX | Stage I T1    |     | 447 Hepatocellno   | No  | stage i    |
| NO | Stage I T1    |     | 1085 Hepatocellno  | No  | stage i    |
| NX | Stage II T2   |     | 6 Hepatocellno     | No  | stage ii   |
| NO | Stage III/T3a |     | 6 Combined lno     | No  | stage iiiæ |
| NO | Stage III/T3b | '-- | Hepatocellno       | No  | stage iiiæ |
| NO | Stage III/T3b |     | 671 Hepatocellyes  | No  | stage iiik |
| NO | Stage I T1    |     | 1567 Hepatocellno  | No  | stage i    |
| NX | Stage III/T3a |     | 445 Hepatocellno   | No  | stage iiiæ |
| NO | Stage I T1    |     | 2028 Hepatocellno  | No  | stage i    |
| NO | Stage III/T3a |     | 1145 Hepatocellno  | No  | stage iiiæ |
| NO | Stage I T1    |     | 673 Hepatocellyes  | Yes | stage i    |
| NX | '-- T4        | '-- | Hepatocellno       | No  | not report |
| NX | Stage I T1    |     | 10 Hepatocellno    | No  | stage i    |
| NX | Stage I T1    |     | 425 Hepatocellno   | No  | stage i    |
| NO | Stage III/T3  |     | 2398 Hepatocellno  | No  | stage iiiæ |
| NO | Stage I T1    |     | 1531 Hepatocellno  | No  | stage i    |
| NO | Stage III/T3  |     | 3 Hepatocellno     | No  | stage iiiæ |
| NX | Stage III/T3a | '-- | Hepatocellyes      | No  | stage iiiæ |
| NO | Stage II T2   |     | 2455 Hepatocellno  | No  | stage ii   |
| NX | '-- T1        |     | 142 Hepatocellno   | No  | not report |
| NX | Stage II T2   | '-- | Hepatocellno       | No  | stage ii   |
| NX | Stage II T2   |     | 216 Hepatocellyes  | No  | stage ii   |
| NO | Stage II T2   |     | 2102 Hepatocellno  | No  | stage ii   |
| NX | Stage II T2   |     | 1115 Hepatocellyes | No  | stage ii   |
| NO | Stage III/T3a |     | 366 Hepatocellno   | No  | stage iiiæ |
| NX | Stage III/T3b |     | 396 Hepatocellno   | No  | stage iiik |
| NO | Stage III/T3  |     | 0 Hepatocellno     | No  | stage iiiæ |
| NX | Stage I T1    |     | 570 Hepatocellno   | No  | stage i    |
| NX | '-- T2        | '-- | Hepatocellno       | No  | not report |
| NO | Stage I T1    |     | 458 Hepatocellno   | No  | stage i    |
| NO | Stage I T1    |     | 1085 Hepatocellno  | No  | stage i    |
| NO | Stage III/T3  | '-- | Hepatocellno       | No  | stage iiiæ |
| NX | Stage II T2   |     | 621 Hepatocellno   | No  | stage ii   |
| NX | Stage III/T3  | '-- | Hepatocellno       | No  | stage iiiæ |
| NX | Stage II T2   |     | 1516 Hepatocellno  | No  | stage ii   |
| NX | Stage I T1    | '-- | Hepatocellno       | No  | stage i    |

|    |               |    |     |                    |    |            |
|----|---------------|----|-----|--------------------|----|------------|
| NO | Stage I       | T1 |     | 453 Hepatocellno   | No | stage i    |
| NO | Stage I       | T1 |     | 1823 Hepatocellno  | No | stage i    |
| NX | Stage I       | T1 |     | 303 Hepatocellyes  | No | stage i    |
| NX | Stage II      | T2 | '-- | Hepatocellno       | No | stage ii   |
| NX | '--           | T3 | '-- | Hepatocellyes      | No | not report |
| NX | Stage II      | T2 |     | 390 Hepatocellno   | No | stage ii   |
| NX | Stage I       | T1 |     | 423 Hepatocellno   | No | stage i    |
| NO | Stage IVB     | T4 | '-- | Hepatocellno       | No | stage ivb  |
| NO | Stage I       | T1 |     | 141 Hepatocellno   | No | stage i    |
| NX | Stage II      | T2 |     | 9 Hepatocellno     | No | stage ii   |
| NO | Stage III/T3a |    | '-- | Hepatocellno       | No | stage iiiæ |
| NO | Stage I       | T1 | '-- | Hepatocellno       | No | stage i    |
| NO | Stage III/T3  |    | '-- | Hepatocellno       | No | stage iiiæ |
| NO | Stage I       | T1 |     | 291 Hepatocellno   | No | stage i    |
| NO | Stage I       | T1 |     | 636 Hepatocellno   | No | stage i    |
| NX | Stage II      | T2 |     | 848 Combined lno   | No | stage ii   |
| NO | Stage III/T3a |    |     | 408 Hepatocellno   | No | stage iiiæ |
| NO | Stage III/T3  |    |     | 399 Hepatocellno   | No | stage iiiæ |
| NO | Stage III/T3  |    | '-- | Hepatocellno       | No | stage iiiæ |
| NO | Stage I       | T1 |     | 2184 Hepatocellno  | No | stage i    |
| NO | Stage I       | T1 |     | 347 Hepatocellno   | No | stage i    |
| NO | Stage I       | T1 |     | 472 Hepatocellno   | No | stage i    |
| NO | Stage I       | T1 |     | 575 Hepatocellyes  | No | stage i    |
| NX | Stage II      | T2 |     | 327 Hepatocellno   | No | stage ii   |
| NO | Stage II      | T2 |     | 2425 Hepatocellno  | No | stage ii   |
| NX | Stage II      | T2 |     | 601 Hepatocellno   | No | stage ii   |
| NO | Stage II      | T2 |     | 1718 Hepatocellno  | No | stage ii   |
| NX | Stage II      | T2 |     | 94 Hepatocellno    | No | stage ii   |
| NX | Stage I       | T1 |     | 260 Hepatocellno   | No | stage i    |
| NX | Stage I       | T1 |     | 1939 Hepatocellno  | No | stage i    |
| NO | Stage I       | T1 |     | 1231 Hepatocellno  | No | stage i    |
| NO | Stage I       | T1 |     | 180 Hepatocellno   | No | stage i    |
| NO | Stage III/T3  |    |     | 0 Hepatocellno     | No | stage iiiæ |
| NO | Stage II      | T2 | '-- | Hepatocellno       | No | stage ii   |
| NO | Stage I       | T1 |     | 728 Hepatocellno   | No | stage i    |
| NO | Stage III/T3a |    |     | 406 Hepatocellno   | No | stage iiiæ |
| NO | Stage I       | T1 |     | 608 Hepatocellno   | No | stage i    |
| NO | Stage I       | T1 |     | 37 Hepatocellno    | No | stage i    |
| NO | Stage I       | T1 | '-- | Hepatocellno       | No | stage i    |
| NO | Stage I       | T1 |     | 1636 Hepatocellno  | No | stage i    |
| NO | Stage III/T3a |    | '-- | Hepatocellno       | No | stage iiiæ |
| NX | Stage I       | T1 |     | 357 Hepatocellyes  | No | stage i    |
| NO | Stage III/T3a |    | '-- | Hepatocellno       | No | stage iiiæ |
| NX | Stage II      | T2 |     | 1 Hepatocellno     | No | stage ii   |
| NO | Stage I       | T1 |     | 719 Hepatocellyes  | No | stage i    |
| NX | Stage I       | T1 |     | 486 Hepatocellno   | No | stage i    |
| NX | Stage I       | T1 | '-- | Hepatocellno       | No | stage i    |
| N1 | Stage III/T2  |    |     | 1008 Hepatocellno  | No | stage iiic |
| NO | Stage II      | T2 |     | 0 Hepatocellyes    | No | stage ii   |
| NO | Stage II      | T2 | '-- | Hepatocellno       | No | stage ii   |
| NO | Stage I       | T1 |     | 2746 Hepatocellyes | No | stage i    |

|    |                |      |                   |    |            |
|----|----------------|------|-------------------|----|------------|
| NO | Stage IIIA/T3  |      | 1970 Hepatocellno | No | stage iiia |
| NO | Stage I T1     | , -- | Hepatocellno      | No | stage i    |
| NO | Stage II T2    | , -- | Hepatocellno      | No | stage ii   |
| NO | Stage IIIA/T3  |      | 0 Hepatocellno    | No | stage iiia |
| NO | Stage II T2    |      | 819 Hepatocellno  | No | stage ii   |
| NX | Stage II T2    |      | 387 Hepatocellyes | No | stage ii   |
| NO | Stage II T2    |      | 0 Hepatocellno    | No | stage ii   |
| NO | Stage I T1     |      | 608 Hepatocellno  | No | stage i    |
| NX | Stage I T1     |      | 0 Hepatocellyes   | No | stage i    |
| NO | Stage II T2    |      | 987 Hepatocellno  | No | stage ii   |
| NO | Stage IIIC/T4  |      | 0 Hepatocellno    | No | stage iiic |
| NO | Stage III T3   |      | 1495 Hepatocellno | No | stage iii  |
| NO | Stage II T2    |      | 594 Hepatocellno  | No | stage ii   |
| NX | , -- T2        |      | 743 Hepatocellno  | No | not report |
| NO | Stage II T2    |      | 400 Hepatocellno  | No | stage ii   |
| NO | Stage I T1     | , -- | Hepatocellno      | No | stage i    |
| NO | Stage II T2    |      | 854 Hepatocellno  | No | stage ii   |
| NX | , -- T1        | , -- | Hepatocellyes     | No | not report |
| NO | Stage II T2    |      | 554 Hepatocellno  | No | stage ii   |
| NO | Stage I T1     |      | 1731 Hepatocellno | No | stage i    |
| N1 | Stage IIIC/T3  |      | 0 Hepatocellno    | No | stage iiic |
| NX | Stage I T1     | , -- | Hepatocellyes     | No | stage i    |
| NX | Stage II T2    |      | 520 Hepatocellno  | No | stage ii   |
| NO | Stage I T1     | , -- | Hepatocellno      | No | stage i    |
| NO | Stage IIIA/T3a |      | 449 Hepatocellno  | No | stage iiia |
| N1 | Stage IVA T1   |      | 15 Hepatocellno   | No | stage iva  |
| NX | Stage II T2    |      | 395 Hepatocellno  | No | stage ii   |
| NO | Stage I T1     |      | 2301 Hepatocellno | No | stage i    |
| NO | Stage I T1     |      | 729 Hepatocellno  | No | stage i    |
| NX | Stage I T1     |      | 2442 Hepatocellno | No | stage i    |
| NO | Stage I T1     |      | 480 Hepatocellno  | No | stage i    |
| NO | Stage I T1     |      | 9 Hepatocellno    | No | stage i    |
| NO | Stage III T3   | , -- | Hepatocellno      | No | stage iii  |
| NO | Stage I T1     |      | 1450 Hepatocellno | No | stage i    |
| NX | Stage II T2    | , -- | Hepatocellno      | No | stage ii   |
| NO | Stage I T1     |      | 409 Hepatocellno  | No | stage i    |
| NX | , -- T2        | , -- | Hepatocellno      | No | not report |
| NO | Stage I T1     |      | 1711 Hepatocellno | No | stage i    |
| NO | Stage IIIA/T3  |      | 0 Hepatocellno    | No | stage iiia |
| NO | Stage I T1     |      | 44 Hepatocellno   | No | stage i    |
| NO | Stage IIIA/T3  |      | 219 Hepatocellno  | No | stage iiia |
| NO | Stage I T1     |      | 555 Hepatocellno  | No | stage i    |
| NO | Stage IIIA/T3  |      | 365 Hepatocellno  | No | stage iiia |
| NO | Stage I T1     |      | 1233 Hepatocellno | No | stage i    |
| NO | Stage II T2    |      | 382 Hepatocellno  | No | stage ii   |
| NO | Stage II T2    |      | 1618 Hepatocellno | No | stage ii   |
| NX | Stage I , --   |      | 314 Hepatocellyes | No | stage i    |
| NO | Stage IIIA/T3  |      | 0 Hepatocellno    | No | stage iiia |
| NO | Stage IIIA/T3  |      | 925 Hepatocellno  | No | stage iiia |
| NO | Stage I T1     | , -- | Hepatocellno      | No | stage i    |
| NX | Stage IIIA/T3a |      | 20 Hepatocellno   | No | stage iiia |

|    |               |     |                   |    |            |
|----|---------------|-----|-------------------|----|------------|
| NO | Stage IIICT4  | '-- | Hepatocellno      | No | stage iiic |
| NO | Stage I T1    |     | 697 Hepatocellno  | No | stage i    |
| NO | Stage II T2   |     | 412 Hepatocellno  | No | stage ii   |
| NO | Stage I T1    |     | 478 Hepatocellno  | No | stage i    |
| NX | Stage IIIAT3a |     | 363 Hepatocellno  | No | stage iiia |
| NX | '--'--        |     | 747 Hepatocellyes | No | not report |
| NO | Stage I T1    |     | 860 Hepatocellno  | No | stage i    |
| NO | Stage IIICT4  |     | 562 Hepatocellno  | No | stage iiic |
| NO | Stage I T1    |     | 640 Hepatocellno  | No | stage i    |
| NO | Stage II T2   |     | 211 Hepatocellno  | No | stage ii   |
| NO | Stage IIIAT3  |     | 1553 Hepatocellno | No | stage iiia |
| NO | Stage IIIAT3a |     | 500 Hepatocellno  | No | stage iiia |
| NX | Stage I T1    |     | 879 Hepatocellno  | No | stage i    |
| NO | Stage I T1    |     | 784 Hepatocellno  | No | stage i    |
| NO | Stage I T1    |     | 829 Combined kno  | No | stage i    |



treatment\_alcohol\_hibmi

|            |                       |           |
|------------|-----------------------|-----------|
| no         | Radiation Not Report  | 22.230987 |
| no         | PharmaceutNot Report  | 25.216253 |
| no         | Radiation Not Report' | --        |
| no         | PharmaceutNot Report  | 33.632653 |
| no         | Radiation Not Report' | --        |
| no         | Radiation Not Report  | 35.553243 |
| no         | Radiation Not Report  | 21.877551 |
| no         | Radiation Not Report  | 19.571681 |
| no         | Radiation Not Report  | 24.725183 |
| no         | PharmaceutNot Report  | 30.81854  |
| yes        | Radiation Not Report  | 20.545694 |
| no         | Radiation Not Report  | 21.367521 |
| no         | PharmaceutNot Report  | 25.259516 |
| not report | Radiation Not Report  | 19.379197 |
| no         | Radiation Not Report  | 23.875115 |
| no         | PharmaceutNot Report  | 29.407788 |
| no         | Radiation Not Report  | 23.011177 |
| no         | PharmaceutNot Report  | 24        |
| no         | PharmaceutNot Report  | 23.93899  |
| no         | Radiation Not Report' | --        |
| no         | PharmaceutNot Report  | 20.775623 |
| no         | Radiation Not Report  | 24.302487 |
| no         | Radiation Not Report  | 21.786492 |
| no         | Radiation Not Report  | 27.475629 |
| yes        | Radiation Not Report  | 22.408179 |
| no         | Radiation Not Report  | 30.116213 |
| no         | Radiation Not Report  | 31.221304 |
| yes        | Radiation Not Report  | 28.734672 |
| no         | Radiation Not Report  | 25.351541 |
| no         | Radiation Not Report  | 25.259516 |
| no         | PharmaceutNot Report  | 23.624447 |
| no         | PharmaceutNot Report  | 21.203105 |
| no         | Radiation Not Report  | 38.973923 |
| no         | PharmaceutNot Report  | 23.620288 |
| no         | Radiation Not Report  | 34.375    |
| no         | PharmaceutNot Report' | --        |
| yes        | PharmaceutNot Report' | --        |
| no         | Radiation Not Report  | 42.192381 |
| no         | Radiation Not Report  | 29.752066 |
| no         | PharmaceutNot Report  | 15.807896 |
| no         | PharmaceutNot Report  | 20.160701 |
| yes        | PharmaceutNot Report  | 25.81663  |
| no         | PharmaceutNot Report  | 18.938776 |
| no         | Radiation Not Report  | 40.902292 |
| no         | Radiation Not Report  | 35.15625  |
| no         | PharmaceutNot Report  | 21.453287 |
| no         | PharmaceutNot Report  | 18.442546 |
| not report | Radiation Not Report  | 30.116002 |
| no         | PharmaceutNot Report  | 20.971172 |
| no         | Radiation Not Report  | 24.87772  |

|            |               |         |           |
|------------|---------------|---------|-----------|
| no         | PharmaceutNot | Report  | 20.68515  |
| yes        | PharmaceutNot | Report' | --        |
| no         | PharmaceutNot | Report  | 16.974654 |
| no         | PharmaceutNot | Report  | 20.897959 |
| no         | Radiation Not | Report  | 20.703125 |
| no         | PharmaceutNot | Report  | 26.175195 |
| no         | Radiation Not | Report  | 20.957274 |
| no         | PharmaceutNot | Report  | 21.777553 |
| no         | PharmaceutNot | Report' | --        |
| no         | Radiation Not | Report  | 22.832879 |
| no         | PharmaceutNot | Report  | 21.22449  |
| no         | Radiation Not | Report  | 35.294118 |
| no         | Radiation Not | Report  | 23.458562 |
| no         | Radiation Not | Report  | 24.671053 |
| no         | PharmaceutNot | Report  | 32.458413 |
| no         | Radiation Not | Report  | 30.844416 |
| no         | Radiation Not | Report  | 22.13674  |
| no         | PharmaceutNot | Report  | 16.302379 |
| no         | PharmaceutNot | Report  | 29.726516 |
| no         | PharmaceutNot | Report  | 23.140496 |
| no         | PharmaceutNot | Report  | 26.061679 |
| no         | PharmaceutNot | Report  | 18.724174 |
| no         | Radiation Not | Report  | 29.752744 |
| no         | PharmaceutNot | Report  | 23.959094 |
| not report | PharmaceutNot | Report' | --        |
| no         | Radiation Not | Report  | 23.054562 |
| no         | PharmaceutNot | Report  | 23.939481 |
| no         | PharmaceutNot | Report  | 36.831301 |
| no         | Radiation Not | Report  | 21.513859 |
| yes        | PharmaceutNot | Report  | 22.460034 |
| no         | PharmaceutNot | Report  | 24.21875  |
| no         | Radiation Not | Report  | 23.046875 |
| no         | Radiation Not | Report  | 15.987507 |
| no         | PharmaceutNot | Report  | 28.668892 |
| no         | PharmaceutNot | Report  | 35.924515 |
| yes        | PharmaceutNot | Report  | 17.777778 |
| no         | Radiation Not | Report  | 26.827421 |
| no         | Radiation Not | Report  | 21.453287 |
| no         | PharmaceutNot | Report  | 28.650138 |
| no         | Radiation Not | Report' | --        |
| yes        | PharmaceutNot | Report  | 22.321429 |
| no         | PharmaceutNot | Report  | 23.183391 |
| yes        | PharmaceutNot | Report  | 23.355637 |
| not report | Radiation Not | Report  | 22.530612 |
| no         | PharmaceutNot | Report  | 21.707923 |
| no         | PharmaceutNot | Report  | 22.65625  |
| no         | Radiation Not | Report  | 26.81359  |
| no         | PharmaceutNot | Report  | 23.503556 |
| no         | Radiation Not | Report  | 30.666667 |
| no         | PharmaceutNot | Report' | --        |
| no         | Radiation Not | Report  | 37.421396 |

|            |                       |           |
|------------|-----------------------|-----------|
| no         | Radiation Not Report  | 41.963531 |
| no         | PharmaceutNot Report  | 24.835763 |
| no         | PharmaceutNot Report  | 29.337411 |
| yes        | PharmaceutNot Report  | 32.861374 |
| no         | PharmaceutNot Report  | 22.666667 |
| no         | Radiation Not Report  | 26.149277 |
| no         | PharmaceutNot Report  | 33.346481 |
| no         | PharmaceutNot Report  | 19.92513  |
| no         | PharmaceutNot Report  | 35.566499 |
| no         | Radiation Not Report  | 22.89282  |
| no         | Radiation Not Report  | 25.013521 |
| not report | PharmaceutNot Report  | 22.405877 |
| yes        | PharmaceutNot Report  | 22.060354 |
| yes        | Radiation Not Report' | --        |
| no         | Radiation Not Report  | 44.982699 |
| not report | PharmaceutNot Report  | 21.96712  |
| yes        | PharmaceutNot Report  | 27.990363 |
| no         | Radiation Not Report  | 27.452887 |
| no         | PharmaceutNot Report  | 19.705532 |
| not report | PharmaceutNot Report  | 16.588866 |
| no         | Radiation Not Report  | 18.314256 |
| no         | PharmaceutNot Report  | 30.110279 |
| no         | Radiation Not Report  | 23.507805 |
| not report | PharmaceutNot Report  | 23.620288 |
| no         | Radiation Not Report  | 27.993022 |
| no         | Radiation Not Report  | 27.469136 |
| no         | Radiation Not Report  | 23.422091 |
| no         | Radiation Not Report  | 37.716263 |
| no         | PharmaceutNot Report  | 56.142177 |
| no         | PharmaceutNot Report  | 20.661157 |
| no         | PharmaceutNot Report  | 23.140496 |
| no         | PharmaceutNot Report  | 21.644121 |
| yes        | Radiation Not Report  | 32.323232 |
| no         | Radiation Not Report  | 41.097264 |
| not report | PharmaceutNot Report  | 25.458066 |
| no         | Radiation Not Report  | 27.993022 |
| no         | Radiation Not Report  | 33.464035 |
| no         | Radiation Not Report  | 20.284799 |
| no         | Radiation Not Report  | 26.986001 |
| no         | PharmaceutNot Report  | 25.039919 |
| no         | PharmaceutNot Report  | 131.83594 |
| no         | Radiation Not Report  | 20.478267 |
| yes        | Radiation Not Report  | 26.402355 |
| no         | PharmaceutNot Report  | 31.202564 |
| no         | Radiation Not Report  | 28.293345 |
| yes        | Radiation Not Report  | 18.28678  |
| no         | Radiation Not Report  | 27.084159 |
| no         | Radiation Not Report  | 24.386526 |
| no         | Radiation Not Report' | --        |
| no         | Radiation Not Report  | 26.314635 |
| no         | PharmaceutNot Report  | 28.353057 |

|            |                       |            |
|------------|-----------------------|------------|
| no         | Radiation Not Report' | --         |
| not report | PharmaceutNot Report  | 18. 390675 |
| no         | PharmaceutNot Report  | 21. 799445 |
| yes        | PharmaceutNot Report  | 20. 173253 |
| no         | PharmaceutNot Report' | --         |
| no         | Radiation Not Report  | 24. 447279 |
| no         | Radiation Not Report' | --         |
| no         | PharmaceutNot Report  | 21. 303949 |
| not report | Radiation Not Report  | 20. 504934 |
| no         | Radiation Not Report  | 22. 151023 |
| no         | PharmaceutNot Report  | 24. 977043 |
| not report | PharmaceutNot Report  | 27. 531229 |
| no         | PharmaceutNot Report  | 25. 344353 |
| no         | Radiation Not Report  | 23. 384354 |
| yes        | PharmaceutNot Report  | 22. 634676 |
| no         | PharmaceutNot Report  | 20. 3125   |
| no         | PharmaceutNot Report  | 21. 755469 |
| no         | PharmaceutNot Report  | 24. 221453 |
| no         | Radiation Not Report  | 21. 258503 |
| no         | PharmaceutNot Report  | 22. 151023 |
| no         | PharmaceutNot Report  | 25. 142857 |
| no         | Radiation Not Report  | 25. 142857 |
| not report | PharmaceutNot Report' | --         |
| not report | PharmaceutNot Report  | 22. 65625  |
| no         | PharmaceutNot Report  | 20. 324438 |
| no         | Radiation Not Report  | 23. 588329 |
| no         | Radiation Not Report  | 21. 192742 |
| no         | Radiation Not Report  | 31. 600115 |
| no         | PharmaceutNot Report' | --         |
| no         | Radiation Not Report  | 31. 652184 |
| yes        | PharmaceutNot Report  | 29. 053288 |
| no         | Radiation Not Report  | 29. 585799 |
| no         | PharmaceutNot Report  | 30. 486657 |
| no         | Radiation Not Report  | 23. 233456 |
| no         | Radiation Not Report  | 22. 408179 |
| no         | PharmaceutNot Report' | --         |
| no         | Radiation Not Report  | 29. 320988 |
| no         | PharmaceutNot Report  | 26. 159334 |
| no         | Radiation Not Report  | 26. 297578 |
| no         | Radiation Not Report' | --         |
| not report | PharmaceutNot Report  | 29. 938272 |
| no         | PharmaceutNot Report  | 20. 93212  |
| no         | Radiation Not Report  | 35. 492458 |
| no         | Radiation Not Report  | 25. 315454 |
| no         | PharmaceutNot Report  | 35. 188533 |
| no         | Radiation Not Report  | 28. 395062 |
| no         | PharmaceutNot Report  | 23. 388687 |
| no         | Radiation Not Report  | 19. 382145 |
| no         | PharmaceutNot Report  | 23. 323418 |
| no         | Radiation Not Report  | 25. 806452 |
| no         | Radiation Not Report  | 44. 288549 |

|            |                                 |
|------------|---------------------------------|
| no         | Radiation Not Report' --        |
| no         | Radiation Not Report 26. 259585 |
| not report | PharmaceutNot Report 26. 42357  |
| no         | Radiation Not Report 20. 936639 |
| no         | PharmaceutNot Report 26. 709402 |
| no         | PharmaceutNot Report 16. 528926 |
| no         | Radiation Not Report' --        |
| no         | Radiation Not Report 21. 872423 |
| no         | Radiation Not Report 33. 304989 |
| no         | PharmaceutNot Report 24. 622961 |
| no         | PharmaceutNot Report 32. 71862  |
| no         | PharmaceutNot Report 23. 62949  |
| no         | PharmaceutNot Report 27. 041644 |
| no         | PharmaceutNot Report 25. 344353 |
| no         | Radiation Not Report 23. 427738 |
| no         | Radiation Not Report 25. 28257  |
| no         | Radiation Not Report 25. 654372 |
| no         | Radiation Not Report 19. 777699 |
| not report | PharmaceutNot Report 22. 145329 |
| no         | PharmaceutNot Report 22. 790358 |
| no         | PharmaceutNot Report 27. 472527 |
| no         | PharmaceutNot Report 24. 314124 |
| no         | PharmaceutNot Report 34. 949435 |
| no         | Radiation Not Report 25. 951557 |
| no         | PharmaceutNot Report 23. 828125 |
| no         | Radiation Not Report 32. 95068  |
| no         | Radiation Not Report' --        |
| not report | PharmaceutNot Report 20. 576132 |
| no         | PharmaceutNot Report 29. 142146 |
| no         | PharmaceutNot Report 40. 260916 |
| no         | Radiation Not Report 24. 508946 |
| no         | Radiation Not Report 20. 147972 |
| no         | Radiation Not Report 24. 983563 |
| no         | PharmaceutNot Report 28. 440955 |
| no         | Radiation Not Report 19. 713322 |
| no         | PharmaceutNot Report' --        |
| no         | Radiation Not Report 35. 224514 |
| no         | Radiation Not Report 28. 87544  |
| no         | Radiation Not Report 31. 405613 |
| no         | Radiation Not Report 26. 218821 |
| yes        | PharmaceutNot Report 28. 393726 |
| no         | Radiation Not Report 18. 986591 |
| no         | Radiation Not Report' --        |
| no         | PharmaceutNot Report 35. 055632 |
| no         | PharmaceutNot Report 24. 023809 |
| no         | PharmaceutNot Report 23. 507805 |
| yes        | Radiation Not Report 23. 836735 |
| no         | Radiation Not Report 27. 160494 |
| yes        | Radiation Not Report 28. 042817 |
| no         | PharmaceutNot Report 32. 770513 |
| no         | PharmaceutNot Report 30. 436716 |

|            |                       |           |
|------------|-----------------------|-----------|
| no         | Radiation Not Report  | 20.549887 |
| no         | Radiation Not Report  | 25.209201 |
| no         | PharmaceutNot Report  | 25.864512 |
| no         | Radiation Not Report  | 24.158818 |
| no         | Radiation Not Report  | 35.629017 |
| no         | Radiation Not Report  | 16.436555 |
| no         | PharmaceutNot Report  | 23.889463 |
| yes        | PharmaceutNot Report  | 38.368735 |
| no         | PharmaceutNot Report  | 18.195483 |
| not report | Radiation Not Report' | --        |
| no         | PharmaceutNot Report  | 28.650138 |
| yes        | PharmaceutNot Report  | 20.79673  |
| no         | PharmaceutNot Report  | 22.206331 |
| no         | PharmaceutNot Report  | 27.428571 |
| no         | PharmaceutNot Report  | 20.964361 |
| no         | Radiation Not Report' | --        |
| no         | Radiation Not Report  | 19.555556 |
| no         | PharmaceutNot Report  | 18.424036 |
| no         | Radiation Not Report  | 18.196579 |
| no         | Radiation Not Report  | 23.624447 |
| no         | Radiation Not Report  | 26.753864 |
| no         | Radiation Not Report  | 21.007668 |
| no         | PharmaceutNot Report  | 24.84098  |
| yes        | Radiation Not Report  | 29.352355 |
| no         | Radiation Not Report  | 23.612751 |
| no         | Radiation Not Report  | 19.135802 |
| yes        | PharmaceutNot Report  | 20.515086 |
| no         | PharmaceutNot Report  | 33.333333 |
| no         | Radiation Not Report  | 26.533759 |
| no         | PharmaceutNot Report  | 32.889189 |
| no         | Radiation Not Report  | 24.092971 |
| not report | Radiation Not Report  | 35.139302 |
| no         | PharmaceutNot Report  | 20.808561 |
| no         | Radiation Not Report  | 23.030045 |
| no         | Radiation Not Report  | 33.690052 |
| no         | PharmaceutNot Report  | 21.107266 |
| no         | Radiation Not Report  | 14.526644 |
| yes        | Radiation Not Report  | 26.491508 |
| no         | Radiation Not Report  | 22.206331 |
| no         | Radiation Not Report  | 20.077748 |
| no         | Radiation Not Report  | 27.141582 |
| no         | Radiation Not Report  | 40.680473 |
| no         | PharmaceutNot Report  | 27.33564  |
| not report | Radiation Not Report  | 23.661439 |
| no         | Radiation Not Report  | 18.017206 |
| no         | PharmaceutNot Report  | 27.548209 |
| no         | Radiation Not Report  | 27.440599 |
| no         | PharmaceutNot Report  | 33.749456 |
| no         | Radiation Not Report' | --        |
| yes        | PharmaceutNot Report  | 29.666548 |
| no         | Radiation Not Report  | 33.912513 |

|            |                       |           |
|------------|-----------------------|-----------|
| no         | Radiation Not Report  | 24.304618 |
| no         | PharmaceutNot Report  | 18.612245 |
| no         | PharmaceutNot Report  | 16.979592 |
| not report | PharmaceutNot Report  | 21.671258 |
| no         | PharmaceutNot Report  | 19.031142 |
| no         | PharmaceutNot Report  | 26.037494 |
| not report | Radiation Not Report' | --        |
| no         | PharmaceutNot Report  | 25.15315  |
| not report | PharmaceutNot Report' | --        |
| no         | PharmaceutNot Report' | --        |
| no         | Radiation Not Report  | 19.650562 |
| no         | Radiation Not Report  | 21.847009 |
| yes        | Radiation Not Report  | 23.781213 |
| no         | PharmaceutNot Report  | 25.013521 |
| no         | PharmaceutNot Report  | 21.907582 |
| no         | Radiation Not Report  | 23.422368 |
| no         | PharmaceutNot Report  | 23.828125 |
| yes        | PharmaceutNot Report  | 37.877211 |
| no         | PharmaceutNot Report  | 26.491508 |
| no         | Radiation Not Report  | 17.755682 |
| no         | Radiation Not Report  | 20.957274 |
| no         | Radiation Not Report  | 30.477966 |
| no         | PharmaceutNot Report  | 31.309074 |
| no         | Radiation Not Report' | --        |
| no         | PharmaceutNot Report  | 22.761468 |
| not report | Radiation Not Report' | --        |
| no         | Radiation Not Report  | 39.836735 |
| no         | Radiation Not Report  | 25.711662 |
| no         | Radiation Not Report' | --        |
| no         | Radiation Not Report  | 33.959184 |
| no         | Radiation Not Report  | 30.078125 |
| no         | PharmaceutNot Report  | 22.985398 |
| no         | PharmaceutNot Report  | 20.069204 |
| no         | Radiation Not Report  | 23.624447 |
| yes        | Radiation Not Report  | 26.093275 |
| no         | PharmaceutNot Report  | 25.155896 |
| no         | Radiation Not Report' | --        |
| no         | PharmaceutNot Report  | 37.756023 |
| no         | PharmaceutNot Report  | 20.307412 |
| no         | Radiation Not Report  | 36.50622  |
| no         | PharmaceutNot Report' | --        |
| no         | PharmaceutNot Report  | 21.218317 |
| no         | PharmaceutNot Report  | 18.285714 |
| no         | Radiation Not Report  | 27.303438 |
| no         | Radiation Not Report  | 19.834711 |
| no         | Radiation Not Report  | 19.979188 |
| no         | PharmaceutNot Report  | 18.612245 |
| no         | PharmaceutNot Report  | 20.195578 |
| no         | Radiation Not Report  | 17.444927 |
| no         | PharmaceutNot Report  | 22.405877 |
| no         | Radiation Not Report' | --        |

|     |                      |           |
|-----|----------------------|-----------|
| no  | Radiation Not Report | 30.218858 |
| no  | Radiation Not Report | 27.774271 |
| no  | PharmaceutNot Report | 30.116213 |
| no  | Radiation Not Report | 28.934069 |
| no  | Radiation Not Report | 31.877288 |
| no  | Radiation Not Report | 28.066424 |
| no  | PharmaceutNot Report | 25.737081 |
| no  | Radiation Not Report | 25.605536 |
| no  | PharmaceutNot Report | 22.37568  |
| no  | PharmaceutNot Report | 23.781213 |
| no  | Radiation Not Report | 22.948116 |
| yes | Radiation Not Report | 25.180785 |
| no  | PharmaceutNot Report | 61.673061 |
| no  | PharmaceutNot Report | 23.335466 |
| no  | PharmaceutNot Report | 28.668892 |
