# Supplementary material for: The Landscape of Using Glycosyltransferase Gene Signatures for Overall Survival Prediction in Hepatocellular Carcinoma
Source: Hindawi journal article supplement (doi:10.1155/2022/5989419), 2022-06-21
Supplement: f1 [file 5989419.f1.zip]

| ID        | Descriptio  | setSize | enrichment | NES       | pvalue   | p.adjust  | qvalues   |
|-----------|-------------|---------|------------|-----------|----------|-----------|-----------|
| G0:000022 | microtubul  | 520     | 0.4850821  | 1.6357242 | 0.000999 | 0.0199726 | 0.0159612 |
| G0:000027 | mitotic ce  | 942     | 0.4969871  | 1.6953177 | 0.000999 | 0.0199726 | 0.0159612 |
| G0:000090 | cell morph  | 994     | 0.3592589  | 1.2271772 | 0.000999 | 0.0199726 | 0.0159612 |
| G0:000181 | cytokine r  | 713     | 0.4105058  | 1.3934396 | 0.000999 | 0.0199726 | 0.0159612 |
| G0:000181 | regulator   | 644     | 0.4171677  | 1.4134479 | 0.000999 | 0.0199726 | 0.0159612 |
| G0:000181 | positive r  | 426     | 0.4190528  | 1.4070083 | 0.000999 | 0.0199726 | 0.0159612 |
| G0:000200 | morphogene  | 520     | 0.4153179  | 1.4004754 | 0.000999 | 0.0199726 | 0.0159612 |
| G0:000226 | cell activ  | 677     | 0.4479576  | 1.5195216 | 0.000999 | 0.0199726 | 0.0159612 |
| G0:000227 | myeloid le  | 622     | 0.4665462  | 1.5801816 | 0.000999 | 0.0199726 | 0.0159612 |
| G0:000227 | myeloid ce  | 522     | 0.4737107  | 1.597401  | 0.000999 | 0.0199726 | 0.0159612 |
| G0:000228 | neutrophil  | 468     | 0.4721995  | 1.5868251 | 0.000999 | 0.0199726 | 0.0159612 |
| G0:000236 | leukocyte   | 674     | 0.448617   | 1.5218075 | 0.000999 | 0.0199726 | 0.0159612 |
| G0:000244 | leukocyte   | 738     | 0.4264809  | 1.4481181 | 0.000999 | 0.0199726 | 0.0159612 |
| G0:000244 | neutrophil  | 479     | 0.4710272  | 1.5856378 | 0.000999 | 0.0199726 | 0.0159612 |
| G0:000252 | immune sys  | 907     | 0.3939634  | 1.3431136 | 0.000999 | 0.0199726 | 0.0159612 |
| G0:000252 | leukocyte   | 490     | 0.408596   | 1.3754477 | 0.000999 | 0.0199726 | 0.0159612 |
| G0:000268 | positive r  | 1000    | 0.3736783  | 1.276477  | 0.000999 | 0.0199726 | 0.0159612 |
| G0:000275 | immune res  | 496     | 0.4472992  | 1.50616   | 0.000999 | 0.0199726 | 0.0159612 |
| G0:000276 | immune res  | 371     | 0.4711499  | 1.5753861 | 0.000999 | 0.0199726 | 0.0159612 |
| G0:000625 | DNA metabo  | 912     | 0.4479104  | 1.5268805 | 0.000999 | 0.0199726 | 0.0159612 |
| G0:000628 | DNA repair  | 490     | 0.4519938  | 1.5215369 | 0.000999 | 0.0199726 | 0.0159612 |
| G0:000632 | chromatin   | 660     | 0.4046012  | 1.3724884 | 0.000999 | 0.0199726 | 0.0159612 |
| G0:000639 | RNA proces  | 863     | 0.4402512  | 1.499119  | 0.000999 | 0.0199726 | 0.0159612 |
| G0:000641 | translatic  | 576     | 0.4198636  | 1.4191349 | 0.000999 | 0.0199726 | 0.0159612 |
| G0:000688 | exocytosis  | 865     | 0.3948595  | 1.3447369 | 0.000999 | 0.0199726 | 0.0159612 |
| G0:000693 | chemotaxis  | 604     | 0.3902042  | 1.3214412 | 0.000999 | 0.0199726 | 0.0159612 |
| G0:000697 | cellular r  | 782     | 0.4441513  | 1.5095736 | 0.000999 | 0.0199726 | 0.0159612 |
| G0:000701 | microtubul  | 708     | 0.4626713  | 1.5710151 | 0.000999 | 0.0199726 | 0.0159612 |
| G0:000734 | regulator   | 594     | 0.4823632  | 1.6329771 | 0.000999 | 0.0199726 | 0.0159612 |
| G0:000828 | positive r  | 845     | 0.4166532  | 1.4177571 | 0.000999 | 0.0199726 | 0.0159612 |
| G0:000838 | RNA splici  | 412     | 0.4458088  | 1.4950373 | 0.000999 | 0.0199726 | 0.0159612 |
| G0:001049 | proteasome  | 449     | 0.3957709  | 1.3296441 | 0.000999 | 0.0199726 | 0.0159612 |
| G0:001056 | regulator   | 707     | 0.4834443  | 1.6414593 | 0.000999 | 0.0199726 | 0.0159612 |
| G0:001063 | positive r  | 585     | 0.4303194  | 1.4553329 | 0.000999 | 0.0199726 | 0.0159612 |
| G0:001094 | positive r  | 663     | 0.3911456  | 1.326772  | 0.000999 | 0.0199726 | 0.0159612 |
| G0:001603 | viral proc  | 791     | 0.4407604  | 1.4978627 | 0.000999 | 0.0199726 | 0.0159612 |
| G0:001607 | mRNA metak  | 794     | 0.4538033  | 1.5423541 | 0.000999 | 0.0199726 | 0.0159612 |
| G0:001656 | covalent c  | 439     | 0.3976619  | 1.336455  | 0.000999 | 0.0199726 | 0.0159612 |
| G0:001922 | cytokine-m  | 738     | 0.4348773  | 1.4766282 | 0.000999 | 0.0199726 | 0.0159612 |
| G0:002241 | cellular c  | 524     | 0.4079211  | 1.3750366 | 0.000999 | 0.0199726 | 0.0159612 |
| G0:002261 | ribonucleo  | 436     | 0.4740739  | 1.5935462 | 0.000999 | 0.0199726 | 0.0159612 |
| G0:003002 | actin filam | 714     | 0.4089635  | 1.3880958 | 0.000999 | 0.0199726 | 0.0159612 |
| G0:003003 | cell proje  | 519     | 0.4017481  | 1.3546937 | 0.000999 | 0.0199726 | 0.0159612 |
| G0:003003 | actin cyto  | 625     | 0.4214767  | 1.4277111 | 0.000999 | 0.0199726 | 0.0159612 |
| G0:003009 | hemopoiesi  | 821     | 0.392668   | 1.3341164 | 0.000999 | 0.0199726 | 0.0159612 |
| G0:003009 | myeloid ce  | 369     | 0.4189205  | 1.4000407 | 0.000999 | 0.0199726 | 0.0159612 |
| G0:003015 | regulator   | 646     | 0.4120994  | 1.3963667 | 0.000999 | 0.0199726 | 0.0159612 |
| G0:003016 | protein ca  | 868     | 0.3697814  | 1.2593224 | 0.000999 | 0.0199726 | 0.0159612 |
| G0:003033 | regulator   | 793     | 0.3859257  | 1.3117128 | 0.000999 | 0.0199726 | 0.0159612 |
| G0:003117 | neuron pro  | 928     | 0.3925822  | 1.3388482 | 0.000999 | 0.0199726 | 0.0159612 |

|                      |     |           |           |          |           |           |
|----------------------|-----|-----------|-----------|----------|-----------|-----------|
| G0:0031344regulator  | 635 | 0.4201868 | 1.4236759 | 0.000999 | 0.0199726 | 0.0159612 |
| G0:0032446protein mc | 829 | 0.3797054 | 1.290386  | 0.000999 | 0.0199726 | 0.0159612 |
| G0:0032888regulator  | 955 | 0.3762672 | 1.2839003 | 0.000999 | 0.0199726 | 0.0159612 |
| G0:0033365protein lc | 864 | 0.3797372 | 1.2932779 | 0.000999 | 0.0199726 | 0.0159612 |
| G0:0034625cellular p | 981 | 0.4224763 | 1.4424385 | 0.000999 | 0.0199726 | 0.0159612 |
| G0:0034655nucleobase | 609 | 0.3931907 | 1.332019  | 0.000999 | 0.0199726 | 0.0159612 |
| G0:0034666ncRNA meta | 498 | 0.4470508 | 1.5058503 | 0.000999 | 0.0199726 | 0.0159612 |
| G0:0036236granulocyt | 483 | 0.4786092 | 1.6108861 | 0.000999 | 0.0199726 | 0.0159612 |
| G0:0040015regulator  | 918 | 0.3780954 | 1.2891784 | 0.000999 | 0.0199726 | 0.0159612 |
| G0:0040017positive r | 520 | 0.3978778 | 1.3416664 | 0.000999 | 0.0199726 | 0.0159612 |
| G0:0042111T cell act | 436 | 0.43632   | 1.466641  | 0.000999 | 0.0199726 | 0.0159612 |
| G0:0042115neutrophil | 478 | 0.4786605 | 1.6111435 | 0.000999 | 0.0199726 | 0.0159612 |
| G0:0042336taxi       | 606 | 0.3889532 | 1.3178682 | 0.000999 | 0.0199726 | 0.0159612 |
| G0:0043045peptide bi | 600 | 0.408323  | 1.3826946 | 0.000999 | 0.0199726 | 0.0159612 |
| G0:0043065positive r | 611 | 0.4146293 | 1.4044273 | 0.000999 | 0.0199726 | 0.0159612 |
| G0:0043066negative r | 817 | 0.3810219 | 1.2946977 | 0.000999 | 0.0199726 | 0.0159612 |
| G0:0043068positive r | 616 | 0.4123916 | 1.3967846 | 0.000999 | 0.0199726 | 0.0159612 |
| G0:0043069negative r | 833 | 0.3786006 | 1.2872918 | 0.000999 | 0.0199726 | 0.0159612 |
| G0:0043161proteasome | 397 | 0.4049859 | 1.3574745 | 0.000999 | 0.0199726 | 0.0159612 |
| G0:0044087regulator  | 884 | 0.3876868 | 1.3204767 | 0.000999 | 0.0199726 | 0.0159612 |
| G0:0044089positive r | 505 | 0.4023153 | 1.3558829 | 0.000999 | 0.0199726 | 0.0159612 |
| G0:0044405symbiont p | 837 | 0.4339019 | 1.4757125 | 0.000999 | 0.0199726 | 0.0159612 |
| G0:0044415interspeci | 880 | 0.4295461 | 1.4632479 | 0.000999 | 0.0199726 | 0.0159612 |
| G0:0044705multi-orga | 916 | 0.374586  | 1.2769734 | 0.000999 | 0.0199726 | 0.0159612 |
| G0:0044777cell cycle | 565 | 0.5061221 | 1.7096357 | 0.000999 | 0.0199726 | 0.0159612 |
| G0:0045055regulated  | 764 | 0.4085089 | 1.3874157 | 0.000999 | 0.0199726 | 0.0159612 |
| G0:0045087innate imm | 839 | 0.3688435 | 1.2545085 | 0.000999 | 0.0199726 | 0.0159612 |
| G0:0045089regulator  | 423 | 0.4100719 | 1.3760692 | 0.000999 | 0.0199726 | 0.0159612 |
| G0:0045597positive r | 910 | 0.373439  | 1.2728885 | 0.000999 | 0.0199726 | 0.0159612 |
| G0:0045786negative r | 576 | 0.4622866 | 1.5625241 | 0.000999 | 0.0199726 | 0.0159612 |
| G0:0045855regulator  | 735 | 0.392082  | 1.331305  | 0.000999 | 0.0199726 | 0.0159612 |
| G0:0046645lymphocyte | 628 | 0.4302479 | 1.4576545 | 0.000999 | 0.0199726 | 0.0159612 |
| G0:0048285organelle  | 418 | 0.4910112 | 1.646548  | 0.000999 | 0.0199726 | 0.0159612 |
| G0:0048534hematopoie | 863 | 0.391686  | 1.3337472 | 0.000999 | 0.0199726 | 0.0159612 |
| G0:0048725tissue mor | 639 | 0.3922143 | 1.3288335 | 0.000999 | 0.0199726 | 0.0159612 |
| G0:0050865regulator  | 510 | 0.4120022 | 1.3887356 | 0.000999 | 0.0199726 | 0.0159612 |
| G0:0050906leukocyte  | 412 | 0.4885808 | 1.6384749 | 0.000999 | 0.0199726 | 0.0159612 |
| G0:0051125negative r | 664 | 0.4014995 | 1.3618941 | 0.000999 | 0.0199726 | 0.0159612 |
| G0:0051276regulator  | 926 | 0.378176  | 1.2895104 | 0.000999 | 0.0199726 | 0.0159612 |
| G0:0051278positive r | 505 | 0.4060149 | 1.3683513 | 0.000999 | 0.0199726 | 0.0159612 |
| G0:0051338regulator  | 904 | 0.3870904 | 1.3190513 | 0.000999 | 0.0199726 | 0.0159612 |
| G0:0051348positive r | 708 | 0.3840824 | 1.3041638 | 0.000999 | 0.0199726 | 0.0159612 |
| G0:0051495regulator  | 502 | 0.4526382 | 1.5249331 | 0.000999 | 0.0199726 | 0.0159612 |
| G0:0051646organelle  | 682 | 0.4295112 | 1.4571759 | 0.000999 | 0.0199726 | 0.0159612 |
| G0:0051656establishm | 492 | 0.4300883 | 1.4480477 | 0.000999 | 0.0199726 | 0.0159612 |
| G0:0051966regulator  | 869 | 0.3783157 | 1.2883931 | 0.000999 | 0.0199726 | 0.0159612 |
| G0:0051968positive r | 508 | 0.4029339 | 1.3580328 | 0.000999 | 0.0199726 | 0.0159612 |
| G0:0060284regulator  | 883 | 0.3646121 | 1.2419388 | 0.000999 | 0.0199726 | 0.0159612 |
| G0:0060341regulator  | 862 | 0.4038343 | 1.3750648 | 0.000999 | 0.0199726 | 0.0159612 |
| G0:0060548negative r | 910 | 0.3848888 | 1.3119157 | 0.000999 | 0.0199726 | 0.0159612 |
| G0:0061024membrane c | 756 | 0.4158083 | 1.4118423 | 0.000999 | 0.0199726 | 0.0159612 |

|                      |     |           |           |          |           |           |
|----------------------|-----|-----------|-----------|----------|-----------|-----------|
| G0:0070647protein mc | 997 | 0.3768206 | 1.287348  | 0.000999 | 0.0199726 | 0.0159612 |
| G0:0070926organelle  | 778 | 0.40561   | 1.3781512 | 0.000999 | 0.0199726 | 0.0159612 |
| G0:0072657protein lc | 584 | 0.4284209 | 1.4491192 | 0.000999 | 0.0199726 | 0.0159612 |
| G0:0080135regulator  | 671 | 0.3913747 | 1.3279457 | 0.000999 | 0.0199726 | 0.0159612 |
| G0:0097435supramolec | 630 | 0.4316813 | 1.4622586 | 0.000999 | 0.0199726 | 0.0159612 |
| G0:0098606cell-cell  | 786 | 0.3865449 | 1.3135888 | 0.000999 | 0.0199726 | 0.0159612 |
| G0:0120031plasma men | 508 | 0.3973005 | 1.3390462 | 0.000999 | 0.0199726 | 0.0159612 |
| G0:0120035regulator  | 626 | 0.4167516 | 1.4118074 | 0.000999 | 0.0199726 | 0.0159612 |
| G0:1901987regulator  | 418 | 0.5032005 | 1.6874235 | 0.000999 | 0.0199726 | 0.0159612 |
| G0:1903047mitotic ce | 803 | 0.510581  | 1.7349888 | 0.000999 | 0.0199726 | 0.0159612 |
| G0:1903706regulator  | 425 | 0.4053373 | 1.3608398 | 0.000999 | 0.0199726 | 0.0159612 |
| G0:1903827regulator  | 500 | 0.4259996 | 1.4349391 | 0.000999 | 0.0199726 | 0.0159612 |
| G0:2000145regulator  | 848 | 0.3873687 | 1.3182511 | 0.000999 | 0.0199726 | 0.0159612 |
| G0:2000147positive r | 490 | 0.4058655 | 1.3662561 | 0.000999 | 0.0199726 | 0.0159612 |
| G0:0000375RNA splici | 330 | 0.4539719 | 1.5133973 | 0.001    | 0.0199726 | 0.0159612 |
| G0:0000377RNA splici | 327 | 0.4533001 | 1.510233  | 0.001    | 0.0199726 | 0.0159612 |
| G0:0000398mRNA splic | 327 | 0.4533001 | 1.510233  | 0.001    | 0.0199726 | 0.0159612 |
| G0:0001666response t | 332 | 0.4258332 | 1.4192451 | 0.001    | 0.0199726 | 0.0159612 |
| G0:0002444myeloid le | 530 | 0.4674437 | 1.5757348 | 0.001    | 0.0199726 | 0.0159612 |
| G0:0002694regulator  | 473 | 0.4369675 | 1.4685885 | 0.001    | 0.0199726 | 0.0159612 |
| G0:0002764immune res | 528 | 0.4327264 | 1.4586207 | 0.001    | 0.0199726 | 0.0159612 |
| G0:0006397mRNA proce | 476 | 0.4340746 | 1.4597689 | 0.001    | 0.0199726 | 0.0159612 |
| G0:0006915nucleocytc | 331 | 0.4260477 | 1.4203715 | 0.001    | 0.0199726 | 0.0159612 |
| G0:0007155leukocyte  | 312 | 0.4695597 | 1.5637432 | 0.001    | 0.0199726 | 0.0159612 |
| G0:0007264small GTPa | 540 | 0.3992196 | 1.3462663 | 0.001    | 0.0199726 | 0.0159612 |
| G0:0010608posttransc | 552 | 0.4128014 | 1.3927057 | 0.001    | 0.0199726 | 0.0159612 |
| G0:0010945negative r | 313 | 0.5055795 | 1.6836332 | 0.001    | 0.0199726 | 0.0159612 |
| G0:0010975regulator  | 467 | 0.3914321 | 1.3148063 | 0.001    | 0.0199726 | 0.0159612 |
| G0:0030195extracellu | 356 | 0.4328369 | 1.4454442 | 0.001    | 0.0199726 | 0.0159612 |
| G0:0030335positive r | 472 | 0.4012219 | 1.3484089 | 0.001    | 0.0199726 | 0.0159612 |
| G0:0032984protein-cc | 318 | 0.4185983 | 1.3942993 | 0.001    | 0.0199726 | 0.0159612 |
| G0:0033044regulator  | 311 | 0.4757813 | 1.5838327 | 0.001    | 0.0199726 | 0.0159612 |
| G0:0043254regulator  | 431 | 0.4116637 | 1.3823124 | 0.001    | 0.0199726 | 0.0159612 |
| G0:0043295leukocyte  | 513 | 0.4821781 | 1.6248382 | 0.001    | 0.0199726 | 0.0159612 |
| G0:0043315neutrophil | 465 | 0.4790194 | 1.6091483 | 0.001    | 0.0199726 | 0.0159612 |
| G0:0044775mitotic ce | 533 | 0.5078025 | 1.7122751 | 0.001    | 0.0199726 | 0.0159612 |
| G0:0045787positive r | 357 | 0.4692329 | 1.5667349 | 0.001    | 0.0199726 | 0.0159612 |
| G0:0051165nuclear tr | 334 | 0.4285299 | 1.4286781 | 0.001    | 0.0199726 | 0.0159612 |
| G0:0051301cell divis | 558 | 0.5151651 | 1.7387381 | 0.001    | 0.0199726 | 0.0159612 |
| G0:0071906regulator  | 475 | 0.4095166 | 1.3768037 | 0.001    | 0.0199726 | 0.0159612 |
| G0:0097196apoptotic  | 569 | 0.4267209 | 1.4412851 | 0.001    | 0.0199726 | 0.0159612 |
| G0:1902905regulator  | 322 | 0.4241504 | 1.4125217 | 0.001    | 0.0199726 | 0.0159612 |
| G0:1903311regulator  | 312 | 0.4246278 | 1.4141094 | 0.001    | 0.0199726 | 0.0159612 |
| G0:1903825positive r | 314 | 0.4555183 | 1.517168  | 0.001    | 0.0199726 | 0.0159612 |
| G0:1990775protein lc | 300 | 0.4220061 | 1.402719  | 0.001    | 0.0199726 | 0.0159612 |
| G0:0000286nuclear di | 380 | 0.5077361 | 1.6975932 | 0.001001 | 0.0199726 | 0.0159612 |
| G0:0002425immune res | 340 | 0.491825  | 1.6399764 | 0.001001 | 0.0199726 | 0.0159612 |
| G0:0006401RNA catabo | 373 | 0.4840832 | 1.6183644 | 0.001001 | 0.0199726 | 0.0159612 |
| G0:0006402mRNA catak | 342 | 0.4797497 | 1.5996733 | 0.001001 | 0.0199726 | 0.0159612 |
| G0:0007015actin fila | 372 | 0.412806  | 1.379619  | 0.001001 | 0.0199726 | 0.0159612 |
| G0:0010635negative r | 352 | 0.4385073 | 1.4633162 | 0.001001 | 0.0199726 | 0.0159612 |

|                      |     |           |           |          |           |           |
|----------------------|-----|-----------|-----------|----------|-----------|-----------|
| G0:0022407regulation | 374 | 0.4114194 | 1.375521  | 0.001001 | 0.0199726 | 0.0159612 |
| G0:0031346positive r | 358 | 0.4228624 | 1.4117852 | 0.001001 | 0.0199726 | 0.0159612 |
| G0:0032535regulation | 351 | 0.4403125 | 1.4694924 | 0.001001 | 0.0199726 | 0.0159612 |
| G0:0034476ncRNA proc | 346 | 0.4595641 | 1.5321058 | 0.001001 | 0.0199726 | 0.0159612 |
| G0:0036295response t | 341 | 0.4256929 | 1.4192079 | 0.001001 | 0.0199726 | 0.0159612 |
| G0:0043906regulation | 372 | 0.4259966 | 1.4237026 | 0.001001 | 0.0199726 | 0.0159612 |
| G0:0050867positive r | 302 | 0.4718203 | 1.5691126 | 0.001001 | 0.0199726 | 0.0159612 |
| G0:0051052regulation | 381 | 0.4395869 | 1.4696386 | 0.001001 | 0.0199726 | 0.0159612 |
| G0:0051245regulation | 394 | 0.4364173 | 1.4616095 | 0.001001 | 0.0199726 | 0.0159612 |
| G0:0060246anatomical | 394 | 0.4260894 | 1.4270202 | 0.001001 | 0.0199726 | 0.0159612 |
| G0:0070482response t | 364 | 0.4184834 | 1.3971553 | 0.001001 | 0.0199726 | 0.0159612 |
| G0:0090156establishm | 306 | 0.4768247 | 1.5874243 | 0.001001 | 0.0199726 | 0.0159612 |
| G0:1901996regulation | 393 | 0.5119623 | 1.7137488 | 0.001001 | 0.0199726 | 0.0159612 |
| G0:2001235regulation | 381 | 0.4411492 | 1.4748617 | 0.001001 | 0.0199726 | 0.0159612 |
| G0:0002696positive r | 291 | 0.4770354 | 1.5839855 | 0.001002 | 0.0199726 | 0.0159612 |
| G0:0006266DNA replic | 261 | 0.509603  | 1.686061  | 0.001002 | 0.0199726 | 0.0159612 |
| G0:0007055chromosome | 297 | 0.5358976 | 1.7780138 | 0.001002 | 0.0199726 | 0.0159612 |
| G0:0045936negative r | 297 | 0.5133994 | 1.7033687 | 0.001002 | 0.0199726 | 0.0159612 |
| G0:0050865regulation | 296 | 0.4467811 | 1.4827662 | 0.001002 | 0.0199726 | 0.0159612 |
| G0:0051256protein pc | 262 | 0.4324541 | 1.4306105 | 0.001002 | 0.0199726 | 0.0159612 |
| G0:0032945mononuclea | 259 | 0.4687438 | 1.5499523 | 0.001003 | 0.0199726 | 0.0159612 |
| G0:0042254ribosome k | 276 | 0.4844862 | 1.6040262 | 0.001003 | 0.0199726 | 0.0159612 |
| G0:0060326cell chemc | 277 | 0.4308624 | 1.4272413 | 0.001003 | 0.0199726 | 0.0159612 |
| G0:0070661leukocyte  | 280 | 0.4703862 | 1.5584341 | 0.001003 | 0.0199726 | 0.0159612 |
| G0:1903037regulation | 279 | 0.4533559 | 1.5021776 | 0.001003 | 0.0199726 | 0.0159612 |
| G0:0034596cellular r | 275 | 0.4299656 | 1.4226155 | 0.001004 | 0.0199726 | 0.0159612 |
| G0:0006316DNA recomb | 252 | 0.4975075 | 1.6435606 | 0.001005 | 0.0199726 | 0.0159612 |
| G0:0007016microtubul | 267 | 0.4301357 | 1.4210671 | 0.001005 | 0.0199726 | 0.0159612 |
| G0:0015931nucleobase | 231 | 0.4294203 | 1.4149364 | 0.001005 | 0.0199726 | 0.0159612 |
| G0:0016072rRNA metak | 233 | 0.4799686 | 1.5815269 | 0.001005 | 0.0199726 | 0.0159612 |
| G0:0016456gene siler | 233 | 0.4287165 | 1.4126481 | 0.001005 | 0.0199726 | 0.0159612 |
| G0:0031505protein-cc | 270 | 0.4509537 | 1.4899719 | 0.001005 | 0.0199726 | 0.0159612 |
| G0:0042116B cell act | 232 | 0.4537552 | 1.4959773 | 0.001005 | 0.0199726 | 0.0159612 |
| G0:0044836cell cycle | 252 | 0.5407731 | 1.7864922 | 0.001005 | 0.0199726 | 0.0159612 |
| G0:0051251positive r | 252 | 0.4702522 | 1.5535201 | 0.001005 | 0.0199726 | 0.0159612 |
| G0:0097195intrinsic  | 271 | 0.468251  | 1.547077  | 0.001005 | 0.0199726 | 0.0159612 |
| G0:0006906phagocytos | 250 | 0.4329329 | 1.429532  | 0.001006 | 0.0199726 | 0.0159612 |
| G0:0007056cell cycle | 228 | 0.4678385 | 1.540896  | 0.001006 | 0.0199726 | 0.0159612 |
| G0:0019882antigen pr | 218 | 0.5476268 | 1.8025386 | 0.001006 | 0.0199726 | 0.0159612 |
| G0:0022616ribonuclec | 228 | 0.4820867 | 1.5878245 | 0.001006 | 0.0199726 | 0.0159612 |
| G0:0031334positive r | 249 | 0.4426441 | 1.46104   | 0.001006 | 0.0199726 | 0.0159612 |
| G0:0044846cell cycle | 250 | 0.4923899 | 1.6258573 | 0.001006 | 0.0199726 | 0.0159612 |
| G0:0046651lymphocyte | 257 | 0.4673724 | 1.5439926 | 0.001006 | 0.0199726 | 0.0159612 |
| G0:0048872homeostasi | 235 | 0.4354593 | 1.4344808 | 0.001006 | 0.0199726 | 0.0159612 |
| G0:0050851antigen re | 230 | 0.4830028 | 1.5915415 | 0.001006 | 0.0199726 | 0.0159612 |
| G0:0051321meiotic ce | 228 | 0.4668076 | 1.5375005 | 0.001006 | 0.0199726 | 0.0159612 |
| G0:0072331signal tra | 256 | 0.4783348 | 1.5795691 | 0.001006 | 0.0199726 | 0.0159612 |
| G0:0090066positive r | 269 | 0.50443   | 1.6663975 | 0.001006 | 0.0199726 | 0.0159612 |
| G0:0140014mitotic nu | 254 | 0.5427286 | 1.7917296 | 0.001006 | 0.0199726 | 0.0159612 |
| G0:2000027regulation | 244 | 0.4250748 | 1.4020715 | 0.001006 | 0.0199726 | 0.0159612 |
| G0:0000082G1/S trans | 237 | 0.4933756 | 1.6261529 | 0.001007 | 0.0199726 | 0.0159612 |



|                      |     |           |           |           |           |           |
|----------------------|-----|-----------|-----------|-----------|-----------|-----------|
| G0:0000086G2/M trans | 237 | 0.5515277 | 1.8178205 | 0.001007  | 0.0199726 | 0.0159612 |
| G0:0002575myeloid le | 195 | 0.450964  | 1.4761534 | 0.001007  | 0.0199726 | 0.0159612 |
| G0:0008154actin poly | 194 | 0.4604253 | 1.5063615 | 0.001007  | 0.0199726 | 0.0159612 |
| G0:0019083viral gene | 185 | 0.5270772 | 1.7160317 | 0.001007  | 0.0199726 | 0.0159612 |
| G0:0022405positive r | 242 | 0.4357675 | 1.4377004 | 0.001007  | 0.0199726 | 0.0159612 |
| G0:0050657nucleic ac | 185 | 0.4693836 | 1.5281959 | 0.001007  | 0.0199726 | 0.0159612 |
| G0:0050658RNA transp | 185 | 0.4693836 | 1.5281959 | 0.001007  | 0.0199726 | 0.0159612 |
| G0:0050673regulator  | 198 | 0.4768961 | 1.5636924 | 0.001007  | 0.0199726 | 0.0159612 |
| G0:0071105DNA confor | 238 | 0.5194549 | 1.7117055 | 0.001007  | 0.0199726 | 0.0159612 |
| G0:0071823ribonuclec | 242 | 0.4785617 | 1.5788887 | 0.001007  | 0.0199726 | 0.0159612 |
| G0:0098815nuclear ch | 242 | 0.5483386 | 1.8090992 | 0.001007  | 0.0199726 | 0.0159612 |
| G0:0110053regulator  | 240 | 0.4251894 | 1.4020453 | 0.001007  | 0.0199726 | 0.0159612 |
| G0:1901988negative r | 226 | 0.5291435 | 1.7414711 | 0.001007  | 0.0199726 | 0.0159612 |
| G0:2000116regulator  | 223 | 0.4996182 | 1.6441804 | 0.001007  | 0.0199726 | 0.0159612 |
| G0:2001023regulator  | 194 | 0.4522648 | 1.4796631 | 0.001007  | 0.0199726 | 0.0159612 |
| G0:0006403RNA locali | 222 | 0.4873613 | 1.6031316 | 0.0010081 | 0.0199726 | 0.0159612 |
| G0:0007165establishm | 206 | 0.4577124 | 1.5043478 | 0.0010081 | 0.0199726 | 0.0159612 |
| G0:0032944regulator  | 199 | 0.4810876 | 1.5775643 | 0.0010081 | 0.0199726 | 0.0159612 |
| G0:0050873positive r | 193 | 0.4788666 | 1.5652691 | 0.0010081 | 0.0199726 | 0.0159612 |
| G0:1901991negative r | 214 | 0.5358362 | 1.7614011 | 0.0010081 | 0.0199726 | 0.0159612 |
| G0:1903035positive r | 207 | 0.4874132 | 1.6020198 | 0.0010081 | 0.0199726 | 0.0159612 |
| G0:0000075cell cycle | 203 | 0.5234447 | 1.7171849 | 0.0010091 | 0.0199726 | 0.0159612 |
| G0:0000956nuclear-tr | 192 | 0.4846288 | 1.5823766 | 0.0010091 | 0.0199726 | 0.0159612 |
| G0:0006364rRNA proce | 200 | 0.4865545 | 1.5954504 | 0.0010091 | 0.0199726 | 0.0159612 |
| G0:0006457protein fo | 203 | 0.4905501 | 1.6092727 | 0.0010091 | 0.0199726 | 0.0159612 |
| G0:0006612protein ta | 183 | 0.4799233 | 1.5598044 | 0.0010091 | 0.0199726 | 0.0159612 |
| G0:0032271regulator  | 204 | 0.4757317 | 1.561681  | 0.0010091 | 0.0199726 | 0.0159612 |
| G0:0043281regulator  | 203 | 0.5004047 | 1.6416012 | 0.0010091 | 0.0199726 | 0.0159612 |
| G0:0043903regulator  | 208 | 0.4452576 | 1.4632842 | 0.0010091 | 0.0199726 | 0.0159612 |
| G0:0071456cellular r | 190 | 0.4477775 | 1.4606365 | 0.0010091 | 0.0199726 | 0.0159612 |
| G0:0071824protein-DM | 201 | 0.4882923 | 1.6010089 | 0.0010091 | 0.0199726 | 0.0159612 |
| G0:0097525myeloid le | 192 | 0.4854826 | 1.5851643 | 0.0010091 | 0.0199726 | 0.0159612 |
| G0:1902745regulator  | 200 | 0.5614131 | 1.8409178 | 0.0010091 | 0.0199726 | 0.0159612 |
| G0:0000815sister chr | 177 | 0.5960778 | 1.9339141 | 0.0010101 | 0.0199726 | 0.0159612 |
| G0:0006302double-str | 210 | 0.4756288 | 1.5627674 | 0.0010101 | 0.0199726 | 0.0159612 |
| G0:0006611protein ex | 176 | 0.4612897 | 1.4958427 | 0.0010101 | 0.0199726 | 0.0159612 |
| G0:0010385regulator  | 187 | 0.5749022 | 1.8715702 | 0.0010101 | 0.0199726 | 0.0159612 |
| G0:0010952positive r | 176 | 0.4621981 | 1.4987886 | 0.0010101 | 0.0199726 | 0.0159612 |
| G0:0030595leukocyte  | 205 | 0.4764336 | 1.5633269 | 0.0010101 | 0.0199726 | 0.0159612 |
| G0:0032886regulator  | 210 | 0.4809109 | 1.5801229 | 0.0010101 | 0.0199726 | 0.0159612 |
| G0:0050852T cell rec | 187 | 0.4780895 | 1.5564004 | 0.0010101 | 0.0199726 | 0.0159612 |
| G0:0051168nuclear ex | 191 | 0.4574818 | 1.4923574 | 0.0010101 | 0.0199726 | 0.0159612 |
| G0:0051236establishm | 188 | 0.4690776 | 1.5276104 | 0.0010101 | 0.0199726 | 0.0159612 |
| G0:0051495positive r | 213 | 0.4559616 | 1.4988073 | 0.0010101 | 0.0199726 | 0.0159612 |
| G0:0061015regulator  | 191 | 0.4483578 | 1.4625937 | 0.0010101 | 0.0199726 | 0.0159612 |
| G0:1905333regulator  | 176 | 0.4765243 | 1.5452448 | 0.0010101 | 0.0199726 | 0.0159612 |
| G0:0006415translatic | 181 | 0.5087439 | 1.651707  | 0.0010111 | 0.0199726 | 0.0159612 |
| G0:0007051spindle or | 160 | 0.5978072 | 1.9301382 | 0.0010111 | 0.0199726 | 0.0159612 |
| G0:0031424keratiniza | 160 | 0.4694449 | 1.5156952 | 0.0010111 | 0.0199726 | 0.0159612 |
| G0:0048002antigen pr | 181 | 0.5631701 | 1.828409  | 0.0010111 | 0.0199726 | 0.0159612 |
| G0:0051054positive r | 209 | 0.4816575 | 1.5814322 | 0.0010111 | 0.0199726 | 0.0159612 |

|           |                      |     |           |           |           |           |           |
|-----------|----------------------|-----|-----------|-----------|-----------|-----------|-----------|
| G0:005130 | regulation of        | 160 | 0.4742302 | 1.5311455 | 0.0010111 | 0.0199726 | 0.0159612 |
| G0:007050 | regulation of        | 181 | 0.5118452 | 1.6617757 | 0.0010111 | 0.0199726 | 0.0159612 |
| G0:007066 | regulation of        | 209 | 0.4740239 | 1.5563688 | 0.0010111 | 0.0199726 | 0.0159612 |
| G0:000247 | antigen presentation | 168 | 0.5625774 | 1.8192582 | 0.0010121 | 0.0199726 | 0.0159612 |
| G0:000836 | regulation of        | 172 | 0.4452819 | 1.4427893 | 0.0010121 | 0.0199726 | 0.0159612 |
| G0:001633 | morphogenesis        | 148 | 0.4635461 | 1.4899696 | 0.0010121 | 0.0199726 | 0.0159612 |
| G0:001988 | antigen presentation | 175 | 0.5589302 | 1.8105896 | 0.0010121 | 0.0199726 | 0.0159612 |
| G0:002240 | membrane transport   | 174 | 0.4946856 | 1.6035588 | 0.0010121 | 0.0199726 | 0.0159612 |
| G0:003004 | actin filament       | 168 | 0.4459586 | 1.4421372 | 0.0010121 | 0.0199726 | 0.0159612 |
| G0:003070 | cytoskeleton         | 174 | 0.4499268 | 1.4584699 | 0.0010121 | 0.0199726 | 0.0159612 |
| G0:003083 | regulation of        | 168 | 0.4770487 | 1.5426762 | 0.0010121 | 0.0199726 | 0.0159612 |
| G0:003809 | Fc receptor          | 173 | 0.4787599 | 1.5518843 | 0.0010121 | 0.0199726 | 0.0159612 |
| G0:004209 | T cell process       | 174 | 0.4580249 | 1.4847206 | 0.0010121 | 0.0199726 | 0.0159612 |
| G0:004348 | regulation of        | 175 | 0.4615496 | 1.4951364 | 0.0010121 | 0.0199726 | 0.0159612 |
| G0:006075 | regulation of        | 166 | 0.450303  | 1.45467   | 0.0010121 | 0.0199726 | 0.0159612 |
| G0:190179 | regulation of        | 172 | 0.4891877 | 1.5850517 | 0.0010121 | 0.0199726 | 0.0159612 |
| G0:200125 | positive regulation  | 163 | 0.4639489 | 1.4976836 | 0.0010121 | 0.0199726 | 0.0159612 |
| G0:000268 | regulation of        | 180 | 0.5085478 | 1.6488005 | 0.0010132 | 0.0199726 | 0.0159612 |
| G0:000698 | response to          | 167 | 0.4604229 | 1.4876002 | 0.0010132 | 0.0199726 | 0.0159612 |
| G0:000806 | regulation of        | 167 | 0.4751156 | 1.5350715 | 0.0010132 | 0.0199726 | 0.0159612 |
| G0:001908 | viral transport      | 171 | 0.5281828 | 1.7102568 | 0.0010132 | 0.0199726 | 0.0159612 |
| G0:003017 | positive regulation  | 169 | 0.4463924 | 1.4434931 | 0.0010132 | 0.0199726 | 0.0159612 |
| G0:004390 | positive regulation  | 180 | 0.4532859 | 1.4696317 | 0.0010132 | 0.0199726 | 0.0159612 |
| G0:006500 | protein-DNA          | 164 | 0.5165892 | 1.6671453 | 0.0010132 | 0.0199726 | 0.0159612 |
| G0:007189 | DNA biosynthesis     | 180 | 0.4579852 | 1.4848678 | 0.0010132 | 0.0199726 | 0.0159612 |
| G0:014005 | organelle            | 165 | 0.4916741 | 1.5868867 | 0.0010132 | 0.0199726 | 0.0159612 |
| G0:190304 | meiotic cell         | 169 | 0.512651  | 1.6577527 | 0.0010132 | 0.0199726 | 0.0159612 |
| G0:200123 | positive regulation  | 167 | 0.4970751 | 1.6060216 | 0.0010132 | 0.0199726 | 0.0159612 |
| G0:000633 | chromatin            | 159 | 0.4788793 | 1.5438081 | 0.0010142 | 0.0199726 | 0.0159612 |
| G0:003220 | telomere c           | 139 | 0.5390877 | 1.727597  | 0.0010142 | 0.0199726 | 0.0159612 |
| G0:003806 | NIK/NF- $\kappa$ B   | 159 | 0.472297  | 1.5225882 | 0.0010142 | 0.0199726 | 0.0159612 |
| G0:004348 | regulation of        | 170 | 0.4584845 | 1.4836483 | 0.0010142 | 0.0199726 | 0.0159612 |
| G0:190547 | regulation of        | 179 | 0.4517577 | 1.4647563 | 0.0010142 | 0.0199726 | 0.0159612 |
| G0:000091 | cytokinesis          | 150 | 0.4807043 | 1.5454025 | 0.0010152 | 0.0199726 | 0.0159612 |
| G0:000626 | DNA-depend           | 145 | 0.5520268 | 1.7713412 | 0.0010152 | 0.0199726 | 0.0159612 |
| G0:000708 | regulation of        | 158 | 0.5095105 | 1.6423007 | 0.0010152 | 0.0199726 | 0.0159612 |
| G0:001095 | positive regulation  | 158 | 0.4624417 | 1.4905842 | 0.0010152 | 0.0199726 | 0.0159612 |
| G0:003320 | tumor necr           | 157 | 0.4996804 | 1.6106258 | 0.0010152 | 0.0199726 | 0.0159612 |
| G0:004312 | positive regulation  | 178 | 0.4401318 | 1.4259411 | 0.0010152 | 0.0199726 | 0.0159612 |
| G0:004593 | positive regulation  | 145 | 0.4939646 | 1.5850315 | 0.0010152 | 0.0199726 | 0.0159612 |
| G0:005102 | mRNA trans           | 145 | 0.4853512 | 1.5573926 | 0.0010152 | 0.0199726 | 0.0159612 |
| G0:005178 | regulation of        | 178 | 0.498296  | 1.6143818 | 0.0010152 | 0.0199726 | 0.0159612 |
| G0:200004 | regulation of        | 144 | 0.4808511 | 1.5415321 | 0.0010152 | 0.0199726 | 0.0159612 |
| G0:000007 | mitotic si           | 146 | 0.6237928 | 2.0014821 | 0.0010163 | 0.0199726 | 0.0159612 |
| G0:000072 | telomere n           | 138 | 0.5379116 | 1.7228536 | 0.0010163 | 0.0199726 | 0.0159612 |
| G0:000173 | morphogenesis        | 138 | 0.5167398 | 1.6550436 | 0.0010163 | 0.0199726 | 0.0159612 |
| G0:000195 | regulation of        | 156 | 0.4521255 | 1.4562076 | 0.0010163 | 0.0199726 | 0.0159612 |
| G0:003083 | regulation of        | 151 | 0.4667711 | 1.5003391 | 0.0010163 | 0.0199726 | 0.0159612 |
| G0:003157 | DNA integr           | 146 | 0.5298302 | 1.6999967 | 0.0010163 | 0.0199726 | 0.0159612 |
| G0:003556 | non-canoni           | 146 | 0.4806126 | 1.5420786 | 0.0010163 | 0.0199726 | 0.0159612 |
| G0:004212 | regulation of        | 146 | 0.4759037 | 1.5269696 | 0.0010163 | 0.0199726 | 0.0159612 |

|                                |     |           |           |           |           |           |
|--------------------------------|-----|-----------|-----------|-----------|-----------|-----------|
| GO:1902806regulation of        | 156 | 0.4565327 | 1.4704024 | 0.0010163 | 0.0199726 | 0.0159612 |
| GO:2001242regulation of        | 151 | 0.50869   | 1.6350786 | 0.0010163 | 0.0199726 | 0.0159612 |
| GO:0007095mitotic cell         | 155 | 0.5528638 | 1.7785026 | 0.0010173 | 0.0199726 | 0.0159612 |
| GO:0140015meiotic nuclear      | 154 | 0.5211433 | 1.6752824 | 0.0010173 | 0.0199726 | 0.0159612 |
| GO:0034605cellular response    | 126 | 0.4987427 | 1.5894053 | 0.0010204 | 0.0199726 | 0.0159612 |
| GO:0050671positive regulation  | 126 | 0.5163201 | 1.6454214 | 0.0010204 | 0.0199726 | 0.0159612 |
| GO:0070585protein localization | 135 | 0.4985446 | 1.5945822 | 0.0010204 | 0.0199726 | 0.0159612 |
| GO:0000077DNA damage           | 134 | 0.5054161 | 1.6142097 | 0.0010215 | 0.0199726 | 0.0159612 |
| GO:0032946positive regulation  | 127 | 0.5222286 | 1.6642098 | 0.0010215 | 0.0199726 | 0.0159612 |
| GO:0042777signal transduction  | 125 | 0.5366712 | 1.7095225 | 0.0010215 | 0.0199726 | 0.0159612 |
| GO:0050921positive regulation  | 131 | 0.4687065 | 1.4952707 | 0.0010215 | 0.0199726 | 0.0159612 |
| GO:0071166ribonucleic acid     | 125 | 0.4951984 | 1.5774142 | 0.0010215 | 0.0199726 | 0.0159612 |
| GO:0072175epithelial cell      | 130 | 0.4738598 | 1.5101303 | 0.0010215 | 0.0199726 | 0.0159612 |
| GO:0097533granulocyte          | 134 | 0.4918849 | 1.5709934 | 0.0010215 | 0.0199726 | 0.0159612 |
| GO:1902853microtubule          | 127 | 0.6131994 | 1.9541107 | 0.0010215 | 0.0199726 | 0.0159612 |
| GO:0001835embryonic            | 122 | 0.488885  | 1.553722  | 0.0010225 | 0.0199726 | 0.0159612 |
| GO:0006405mRNA export          | 132 | 0.491741  | 1.5684579 | 0.0010225 | 0.0199726 | 0.0159612 |
| GO:0070665positive regulation  | 132 | 0.5166476 | 1.6479    | 0.0010225 | 0.0199726 | 0.0159612 |
| GO:0070972protein localization | 132 | 0.4879349 | 1.5563181 | 0.0010225 | 0.0199726 | 0.0159612 |
| GO:0071426ribonucleic acid     | 124 | 0.4936206 | 1.5721128 | 0.0010225 | 0.0199726 | 0.0159612 |
| GO:0072655establishment        | 132 | 0.503323  | 1.6053999 | 0.0010225 | 0.0199726 | 0.0159612 |
| GO:2001251negative regulation  | 122 | 0.5230096 | 1.6621731 | 0.0010225 | 0.0199726 | 0.0159612 |
| GO:0001735establishment        | 121 | 0.5240656 | 1.6636225 | 0.0010235 | 0.0199726 | 0.0159612 |
| GO:0002687positive regulation  | 121 | 0.5318455 | 1.6883197 | 0.0010235 | 0.0199726 | 0.0159612 |
| GO:0007164establishment        | 121 | 0.5240656 | 1.6636225 | 0.0010235 | 0.0199726 | 0.0159612 |
| GO:0000725recombination        | 120 | 0.5314547 | 1.6857734 | 0.0010246 | 0.0199726 | 0.0159612 |
| GO:0030015establishment        | 133 | 0.4730204 | 1.5090321 | 0.0010246 | 0.0199726 | 0.0159612 |
| GO:0006325DNA packaging        | 128 | 0.5586251 | 1.7779703 | 0.0010256 | 0.0199726 | 0.0159612 |
| GO:0000724double-strand        | 119 | 0.5272993 | 1.6700926 | 0.0010267 | 0.0199726 | 0.0159612 |
| GO:0043623regulation of        | 118 | 0.4993221 | 1.5792045 | 0.0010277 | 0.0199726 | 0.0159612 |
| GO:0000184nuclear trans        | 117 | 0.5592568 | 1.7664899 | 0.0010309 | 0.0199726 | 0.0159612 |
| GO:0043615regulation of        | 113 | 0.502799  | 1.5824223 | 0.0010309 | 0.0199726 | 0.0159612 |
| GO:0071621granulocyte          | 117 | 0.5039788 | 1.5918868 | 0.0010309 | 0.0199726 | 0.0159612 |
| GO:0032392DNA geomet           | 112 | 0.502599  | 1.5804422 | 0.001032  | 0.0199726 | 0.0159612 |
| GO:0050864regulation of        | 112 | 0.5063799 | 1.5923313 | 0.001032  | 0.0199726 | 0.0159612 |
| GO:1990266neutrophil           | 112 | 0.5092309 | 1.6012964 | 0.001032  | 0.0199726 | 0.0159612 |
| GO:1904375regulation of        | 111 | 0.4800812 | 1.507802  | 0.0010331 | 0.0199726 | 0.0159612 |
| GO:0006406mRNA export          | 108 | 0.489609  | 1.53005   | 0.0010373 | 0.0199726 | 0.0159612 |
| GO:0031105microtubule          | 108 | 0.5382836 | 1.6821603 | 0.0010373 | 0.0199726 | 0.0159612 |
| GO:0071427mRNA-conta           | 108 | 0.489609  | 1.53005   | 0.0010373 | 0.0199726 | 0.0159612 |
| GO:0072595establishment        | 108 | 0.5482724 | 1.7133757 | 0.0010373 | 0.0199726 | 0.0159612 |
| GO:0090175regulation of        | 108 | 0.5258614 | 1.6433402 | 0.0010373 | 0.0199726 | 0.0159612 |
| GO:0002225innate imm           | 109 | 0.5057364 | 1.5818136 | 0.0010384 | 0.0199726 | 0.0159612 |
| GO:0006335chromatin            | 109 | 0.5373396 | 1.6806605 | 0.0010384 | 0.0199726 | 0.0159612 |
| GO:0034725nucleosome           | 101 | 0.5375791 | 1.673449  | 0.0010406 | 0.0199726 | 0.0159612 |
| GO:1902807negative regulation  | 101 | 0.5211072 | 1.6221729 | 0.0010406 | 0.0199726 | 0.0159612 |
| GO:0006275regulation of        | 102 | 0.511545  | 1.5925455 | 0.0010417 | 0.0199726 | 0.0159612 |
| GO:0007052mitotic sp           | 102 | 0.6231471 | 1.9399857 | 0.0010417 | 0.0199726 | 0.0159612 |
| GO:0030333DNA damage           | 102 | 0.5322215 | 1.6569155 | 0.0010417 | 0.0199726 | 0.0159612 |
| GO:0002225stimulator           | 106 | 0.5141454 | 1.6023312 | 0.0010428 | 0.0199726 | 0.0159612 |
| GO:0045047protein t            | 104 | 0.5565305 | 1.7355084 | 0.0010428 | 0.0199726 | 0.0159612 |

|                       |     |           |           |           |           |           |
|-----------------------|-----|-----------|-----------|-----------|-----------|-----------|
| G0:0060071Wnt signal  | 106 | 0.5245027 | 1.6346096 | 0.0010428 | 0.0199726 | 0.0159612 |
| G0:0071156regulator   | 104 | 0.5174819 | 1.6137375 | 0.0010428 | 0.0199726 | 0.0159612 |
| G0:0002504antigen pr  | 98  | 0.6075532 | 1.8864375 | 0.0010449 | 0.0199726 | 0.0159612 |
| G0:0007225integrin-n  | 98  | 0.522312  | 1.6217655 | 0.0010449 | 0.0199726 | 0.0159612 |
| G0:0030595neutrophil  | 99  | 0.5292264 | 1.6428593 | 0.0010471 | 0.0199726 | 0.0159612 |
| G0:0044774mitotic DN  | 99  | 0.5283592 | 1.6401673 | 0.0010471 | 0.0199726 | 0.0159612 |
| G0:0051225spindle as  | 99  | 0.5901843 | 1.8320888 | 0.0010471 | 0.0199726 | 0.0159612 |
| G0:0051985regulator   | 99  | 0.615445  | 1.9105047 | 0.0010471 | 0.0199726 | 0.0159612 |
| G0:2000134negative r  | 99  | 0.5230358 | 1.623642  | 0.0010471 | 0.0199726 | 0.0159612 |
| G0:0002495antigen pr  | 97  | 0.6063155 | 1.8778792 | 0.0010482 | 0.0199726 | 0.0159612 |
| G0:0006615cotranslat  | 96  | 0.5646389 | 1.7459474 | 0.0010482 | 0.0199726 | 0.0159612 |
| G0:0014026primary ne  | 95  | 0.5001301 | 1.546091  | 0.0010482 | 0.0199726 | 0.0159612 |
| G0:0019885antigen pr  | 95  | 0.5978112 | 1.8480601 | 0.0010482 | 0.0199726 | 0.0159612 |
| G0:0006626protein te  | 94  | 0.4909554 | 1.5142957 | 0.0010549 | 0.0199726 | 0.0159612 |
| G0:1902756negative r  | 94  | 0.5318096 | 1.6403058 | 0.0010549 | 0.0199726 | 0.0159612 |
| G0:1904025regulator   | 94  | 0.5067794 | 1.5631029 | 0.0010549 | 0.0199726 | 0.0159612 |
| G0:0002181cytoplasmic | 93  | 0.4948521 | 1.5235877 | 0.0010582 | 0.0199726 | 0.0159612 |
| G0:0002474antigen pr  | 92  | 0.5112113 | 1.5728224 | 0.0010582 | 0.0199726 | 0.0159612 |
| G0:0006614SRP-depend  | 92  | 0.5673683 | 1.7455985 | 0.0010582 | 0.0199726 | 0.0159612 |
| G0:0030836positive r  | 92  | 0.4966427 | 1.5279998 | 0.0010582 | 0.0199726 | 0.0159612 |
| G0:0097711ciliary ba  | 93  | 0.5252598 | 1.6172093 | 0.0010582 | 0.0199726 | 0.0159612 |
| G0:0000007regulator   | 91  | 0.5098993 | 1.5657506 | 0.0010593 | 0.0199726 | 0.0159612 |
| G0:0042105positive r  | 91  | 0.5428771 | 1.6670158 | 0.0010593 | 0.0199726 | 0.0159612 |
| G0:0048016vascular e  | 88  | 0.494676  | 1.5138877 | 0.0010604 | 0.0199726 | 0.0159612 |
| G0:1901184regulator   | 88  | 0.4906267 | 1.5014953 | 0.0010604 | 0.0199726 | 0.0159612 |
| G0:1901985positive r  | 88  | 0.5387175 | 1.6486705 | 0.0010604 | 0.0199726 | 0.0159612 |
| G0:0042106B cell pro  | 90  | 0.5245556 | 1.6088034 | 0.0010627 | 0.0199726 | 0.0159612 |
| G0:0044775mitotic DN  | 90  | 0.5073675 | 1.5560877 | 0.0010627 | 0.0199726 | 0.0159612 |
| G0:2000117negative r  | 89  | 0.5559409 | 1.7012031 | 0.0010627 | 0.0199726 | 0.0159612 |
| G0:2001245negative r  | 90  | 0.5175729 | 1.5873874 | 0.0010627 | 0.0199726 | 0.0159612 |
| G0:0001776leukocyte   | 86  | 0.504555  | 1.5415134 | 0.0010661 | 0.0199726 | 0.0159612 |
| G0:0006896retrograde  | 82  | 0.5063874 | 1.5420168 | 0.0010661 | 0.0199726 | 0.0159612 |
| G0:0048017ephrin rec  | 86  | 0.5528241 | 1.6889848 | 0.0010661 | 0.0199726 | 0.0159612 |
| G0:0051304chromosome  | 86  | 0.5790038 | 1.7689689 | 0.0010661 | 0.0199726 | 0.0159612 |
| G0:0010975negative r  | 85  | 0.531718  | 1.6220119 | 0.0010684 | 0.0199726 | 0.0159612 |
| G0:0022617extracellu  | 78  | 0.5292919 | 1.6087294 | 0.0010695 | 0.0199726 | 0.0159612 |
| G0:0031145anaphase-p  | 78  | 0.5593742 | 1.7001613 | 0.0010695 | 0.0199726 | 0.0159612 |
| G0:0033045regulator   | 78  | 0.6126769 | 1.8621695 | 0.0010695 | 0.0199726 | 0.0159612 |
| G0:0071157positive r  | 78  | 0.5391988 | 1.6388402 | 0.0010695 | 0.0199726 | 0.0159612 |
| G0:0043154negative r  | 81  | 0.5577741 | 1.6952984 | 0.0010707 | 0.0199726 | 0.0159612 |
| G0:0038094Fc-gamma r  | 77  | 0.5506485 | 1.6691789 | 0.0010718 | 0.0199726 | 0.0159612 |
| G0:0002431Fc recepto  | 80  | 0.5466362 | 1.6626425 | 0.001073  | 0.0199726 | 0.0159612 |
| G0:0045135meiotic ch  | 80  | 0.5295432 | 1.6106526 | 0.001073  | 0.0199726 | 0.0159612 |
| G0:1900034regulator   | 76  | 0.5404634 | 1.6389244 | 0.001073  | 0.0199726 | 0.0159612 |
| G0:0010835telomere n  | 75  | 0.5358896 | 1.6190484 | 0.0010764 | 0.0199726 | 0.0159612 |
| G0:0014015positive r  | 68  | 0.5357549 | 1.6065716 | 0.0010764 | 0.0199726 | 0.0159612 |
| G0:0031497chromatin   | 84  | 0.5652075 | 1.7169886 | 0.0010764 | 0.0199726 | 0.0159612 |
| G0:0032465regulator   | 84  | 0.5300566 | 1.6102071 | 0.0010764 | 0.0199726 | 0.0159612 |
| G0:0034502protein lc  | 75  | 0.5571664 | 1.6833306 | 0.0010764 | 0.0199726 | 0.0159612 |
| G0:0042596antigen pr  | 75  | 0.5433599 | 1.641618  | 0.0010764 | 0.0199726 | 0.0159612 |
| G0:0044786cell cycle  | 68  | 0.5936119 | 1.7800676 | 0.0010764 | 0.0199726 | 0.0159612 |

|                      |    |           |           |           |           |           |
|----------------------|----|-----------|-----------|-----------|-----------|-----------|
| G0:005000(chromosome | 75 | 0.5344525 | 1.6147066 | 0.0010764 | 0.0199726 | 0.0159612 |
| G0:006164(cytoskelet | 84 | 0.5058944 | 1.5368072 | 0.0010764 | 0.0199726 | 0.0159612 |
| G0:007240(signal tra | 68 | 0.5655823 | 1.6960151 | 0.0010764 | 0.0199726 | 0.0159612 |
| G0:007242(signal tra | 68 | 0.5655823 | 1.6960151 | 0.0010764 | 0.0199726 | 0.0159612 |
| G0:190199(positive r | 75 | 0.5510407 | 1.6648235 | 0.0010764 | 0.0199726 | 0.0159612 |
| G0:000243(immune res | 74 | 0.5447207 | 1.6441152 | 0.0010799 | 0.0199726 | 0.0159612 |
| G0:000627(RNA-depend | 67 | 0.5375569 | 1.6097019 | 0.0010799 | 0.0199726 | 0.0159612 |
| G0:003220(regulator  | 74 | 0.5261134 | 1.5879534 | 0.0010799 | 0.0199726 | 0.0159612 |
| G0:003809(Fc-gamma r | 74 | 0.5447207 | 1.6441152 | 0.0010799 | 0.0199726 | 0.0159612 |
| G0:004227(ribosomal  | 67 | 0.553798  | 1.6583356 | 0.0010799 | 0.0199726 | 0.0159612 |
| G0:004545(cell redox | 73 | 0.5260592 | 1.5866583 | 0.0010799 | 0.0199726 | 0.0159612 |
| G0:005130(establishm | 74 | 0.5392594 | 1.6276315 | 0.0010799 | 0.0199726 | 0.0159612 |
| G0:007022(lymphocyte | 69 | 0.5302138 | 1.5911374 | 0.0010799 | 0.0199726 | 0.0159612 |
| G0:007239(signal tra | 69 | 0.5631672 | 1.6900284 | 0.0010799 | 0.0199726 | 0.0159612 |
| G0:200057(positive r | 67 | 0.5273207 | 1.57905   | 0.0010799 | 0.0199726 | 0.0159612 |
| G0:000028(mitotic cy | 71 | 0.5480536 | 1.6483149 | 0.0010834 | 0.0199726 | 0.0159612 |
| G0:000247(antigen pr | 71 | 0.5444492 | 1.6374744 | 0.0010834 | 0.0199726 | 0.0159612 |
| G0:000998(cell-cell  | 71 | 0.5242252 | 1.576649  | 0.0010834 | 0.0199726 | 0.0159612 |
| G0:004304(ATP-depend | 70 | 0.5569953 | 1.6731243 | 0.0010846 | 0.0199726 | 0.0159612 |
| G0:200102(negative r | 70 | 0.5186539 | 1.5579528 | 0.0010846 | 0.0199726 | 0.0159612 |
| G0:000680(superoxide | 66 | 0.5456864 | 1.6256839 | 0.0010858 | 0.0199726 | 0.0159612 |
| G0:003304(regulator  | 66 | 0.6116437 | 1.8221808 | 0.0010858 | 0.0199726 | 0.0159612 |
| G0:003088(regulator  | 61 | 0.5400491 | 1.5941875 | 0.0010893 | 0.0199726 | 0.0159612 |
| G0:003157(mitotic G1 | 61 | 0.5523824 | 1.6305946 | 0.0010893 | 0.0199726 | 0.0159612 |
| G0:003262(interleuki | 61 | 0.5436394 | 1.6047859 | 0.0010893 | 0.0199726 | 0.0159612 |
| G0:004225(ribosome & | 59 | 0.539613  | 1.5886378 | 0.0010893 | 0.0199726 | 0.0159612 |
| G0:004481(mitotic G1 | 61 | 0.5523824 | 1.6305946 | 0.0010893 | 0.0199726 | 0.0159612 |
| G0:004557(mast cell  | 59 | 0.5607951 | 1.6509987 | 0.0010893 | 0.0199726 | 0.0159612 |
| G0:005130(mitotic si | 59 | 0.6412719 | 1.887925  | 0.0010893 | 0.0199726 | 0.0159612 |
| G0:190581(regulator  | 61 | 0.6169056 | 1.8210624 | 0.0010893 | 0.0199726 | 0.0159612 |
| G0:000226(lymphocyte | 62 | 0.5274215 | 1.5569489 | 0.0010917 | 0.0199726 | 0.0159612 |
| G0:000633(nucleosome | 65 | 0.6008183 | 1.7825571 | 0.0010917 | 0.0199726 | 0.0159612 |
| G0:000700(telomere n | 65 | 0.5414654 | 1.6064639 | 0.0010917 | 0.0199726 | 0.0159612 |
| G0:003326(nuclear DN | 58 | 0.6183009 | 1.8137059 | 0.0010917 | 0.0199726 | 0.0159612 |
| G0:004478(G1 DNA dan | 62 | 0.5462586 | 1.6125562 | 0.0010917 | 0.0199726 | 0.0159612 |
| G0:004660(regulator  | 57 | 0.5511584 | 1.6095903 | 0.0010965 | 0.0199726 | 0.0159612 |
| G0:005131(metaphase  | 57 | 0.5990846 | 1.7495525 | 0.0010965 | 0.0199726 | 0.0159612 |
| G0:005178(negative r | 57 | 0.6347978 | 1.8538488 | 0.0010965 | 0.0199726 | 0.0159612 |
| G0:190435(regulator  | 57 | 0.5344265 | 1.5607266 | 0.0010965 | 0.0199726 | 0.0159612 |
| G0:001096(regulator  | 56 | 0.6419723 | 1.8691973 | 0.0011001 | 0.0199726 | 0.0159612 |
| G0:004478(metaphase/ | 56 | 0.6241369 | 1.8172667 | 0.0011001 | 0.0199726 | 0.0159612 |
| G0:007241(signal tra | 56 | 0.5778159 | 1.6823965 | 0.0011001 | 0.0199726 | 0.0159612 |
| G0:190240(signal tra | 56 | 0.5778159 | 1.6823965 | 0.0011001 | 0.0199726 | 0.0159612 |
| G0:190240(signal tra | 56 | 0.5778159 | 1.6823965 | 0.0011001 | 0.0199726 | 0.0159612 |
| G0:004438(protein lc | 55 | 0.5345851 | 1.5516416 | 0.0011074 | 0.0199726 | 0.0159612 |
| G0:007243(signal tra | 55 | 0.5825386 | 1.6908275 | 0.0011074 | 0.0199726 | 0.0159612 |
| G0:190240(intracellu | 55 | 0.5825386 | 1.6908275 | 0.0011074 | 0.0199726 | 0.0159612 |
| G0:000697(DNA damage | 54 | 0.574833  | 1.6637536 | 0.0011099 | 0.0199726 | 0.0159612 |
| G0:000709(metaphase/ | 54 | 0.6315914 | 1.828031  | 0.0011099 | 0.0199726 | 0.0159612 |
| G0:000694(syncytium  | 52 | 0.5600458 | 1.6080206 | 0.0011123 | 0.0199726 | 0.0159612 |
| G0:003261(interleuki | 52 | 0.5572121 | 1.5998844 | 0.0011123 | 0.0199726 | 0.0159612 |

|                      |    |           |           |           |           |           |
|----------------------|----|-----------|-----------|-----------|-----------|-----------|
| G0:0090307mitotic sp | 53 | 0.6155453 | 1.7736469 | 0.0011123 | 0.0199726 | 0.0159612 |
| G0:1902095regulator  | 53 | 0.6316308 | 1.819996  | 0.0011123 | 0.0199726 | 0.0159612 |
| G0:0000768syncytium  | 51 | 0.5774897 | 1.6511826 | 0.0011136 | 0.0199726 | 0.0159612 |
| G0:0030071regulator  | 51 | 0.6398054 | 1.8293582 | 0.0011136 | 0.0199726 | 0.0159612 |
| G0:0045835negative r | 51 | 0.6446184 | 1.84312   | 0.0011136 | 0.0199726 | 0.0159612 |
| G0:0140255cell-cell  | 51 | 0.5774897 | 1.6511826 | 0.0011136 | 0.0199726 | 0.0159612 |
| G0:1903307positive r | 51 | 0.5818903 | 1.663765  | 0.0011136 | 0.0199726 | 0.0159612 |
| G0:0002448mast cell  | 48 | 0.5847848 | 1.6647556 | 0.0011148 | 0.0199726 | 0.0159612 |
| G0:0002275mast cell  | 47 | 0.574076  | 1.6299357 | 0.0011173 | 0.0199726 | 0.0159612 |
| G0:0006636unsaturate | 49 | 0.5719338 | 1.6311078 | 0.0011173 | 0.0199726 | 0.0159612 |
| G0:0030865cortical c | 47 | 0.6137934 | 1.7427026 | 0.0011173 | 0.0199726 | 0.0159612 |
| G0:0036297interstar  | 49 | 0.5807344 | 1.6562062 | 0.0011173 | 0.0199726 | 0.0159612 |
| G0:0048146positive r | 49 | 0.5797392 | 1.6533681 | 0.0011173 | 0.0199726 | 0.0159612 |
| G0:0051655spindle lc | 47 | 0.5990245 | 1.7007703 | 0.0011173 | 0.0199726 | 0.0159612 |
| G0:0007566embryo imp | 43 | 0.6274275 | 1.7566954 | 0.0011312 | 0.0199726 | 0.0159612 |
| G0:0030225macrophage | 43 | 0.5674922 | 1.5888862 | 0.0011312 | 0.0199726 | 0.0159612 |
| G0:0033046negative r | 43 | 0.6817233 | 1.9087147 | 0.0011312 | 0.0199726 | 0.0159612 |
| G0:0043305mast cell  | 46 | 0.576478  | 1.6274595 | 0.0011312 | 0.0199726 | 0.0159612 |
| G0:0051295establishm | 43 | 0.5999783 | 1.6798419 | 0.0011312 | 0.0199726 | 0.0159612 |
| G0:0071675regulator  | 43 | 0.5875169 | 1.6449522 | 0.0011312 | 0.0199726 | 0.0159612 |
| G0:0007086mitotic me | 44 | 0.6146782 | 1.7242654 | 0.0011338 | 0.0199726 | 0.0159612 |
| G0:0051985negative r | 44 | 0.6816726 | 1.9121947 | 0.0011338 | 0.0199726 | 0.0159612 |
| G0:0043306regulator  | 45 | 0.6168681 | 1.7331213 | 0.0011377 | 0.0199726 | 0.0159612 |
| G0:0030866cortical e | 42 | 0.6392418 | 1.7800762 | 0.0011416 | 0.0199726 | 0.0159612 |
| G0:0031055chromatin  | 30 | 0.6795626 | 1.8179887 | 0.0011416 | 0.0199726 | 0.0159612 |
| G0:0043304regulator  | 30 | 0.6223368 | 1.6648963 | 0.0011416 | 0.0199726 | 0.0159612 |
| G0:0043486histone ex | 42 | 0.627434  | 1.7471956 | 0.0011416 | 0.0199726 | 0.0159612 |
| G0:0045066regulatory | 30 | 0.6424361 | 1.7186666 | 0.0011416 | 0.0199726 | 0.0159612 |
| G0:1902751positive r | 30 | 0.6514433 | 1.7427628 | 0.0011416 | 0.0199726 | 0.0159612 |
| G0:0008608attachment | 31 | 0.686896  | 1.8486465 | 0.0011429 | 0.0199726 | 0.0159612 |
| G0:0033005regulator  | 41 | 0.5959928 | 1.6579074 | 0.0011429 | 0.0199726 | 0.0159612 |
| G0:0033048negative r | 41 | 0.680479  | 1.8929274 | 0.0011429 | 0.0199726 | 0.0159612 |
| G0:0034508centromere | 38 | 0.660609  | 1.8259085 | 0.0011429 | 0.0199726 | 0.0159612 |
| G0:0045736respirator | 31 | 0.7030213 | 1.8920446 | 0.0011429 | 0.0199726 | 0.0159612 |
| G0:2000816negative r | 38 | 0.6828699 | 1.887437  | 0.0011429 | 0.0199726 | 0.0159612 |
| G0:0034086CENP-A cor | 28 | 0.6850429 | 1.8084915 | 0.0011481 | 0.0199726 | 0.0159612 |
| G0:0045585regulator  | 28 | 0.6527158 | 1.723149  | 0.0011481 | 0.0199726 | 0.0159612 |
| G0:0050696regulator  | 28 | 0.6335611 | 1.672581  | 0.0011481 | 0.0199726 | 0.0159612 |
| G0:0061641CENP-A cor | 28 | 0.6850429 | 1.8084915 | 0.0011481 | 0.0199726 | 0.0159612 |
| G0:1905816negative r | 39 | 0.6828158 | 1.8906253 | 0.0011494 | 0.0199726 | 0.0159612 |
| G0:0006336DNA replic | 35 | 0.6555835 | 1.786447  | 0.0011507 | 0.0199726 | 0.0159612 |
| G0:0042554superoxide | 35 | 0.6330509 | 1.7250463 | 0.0011507 | 0.0199726 | 0.0159612 |
| G0:0006276DNA replic | 36 | 0.6398931 | 1.7492607 | 0.0011521 | 0.0199726 | 0.0159612 |
| G0:0034724DNA replic | 36 | 0.6422692 | 1.7557563 | 0.0011521 | 0.0199726 | 0.0159612 |
| G0:0040001establishm | 33 | 0.6304137 | 1.7079157 | 0.0011521 | 0.0199726 | 0.0159612 |
| G0:0045841negative r | 36 | 0.6738804 | 1.842171  | 0.0011521 | 0.0199726 | 0.0159612 |
| G0:0007335binding of | 37 | 0.5811429 | 1.5928843 | 0.0011534 | 0.0199726 | 0.0159612 |
| G0:0032467positive r | 37 | 0.5906916 | 1.619057  | 0.0011534 | 0.0199726 | 0.0159612 |
| G0:1902106negative r | 37 | 0.6738162 | 1.8468975 | 0.0011534 | 0.0199726 | 0.0159612 |
| G0:1904358positive r | 37 | 0.5878898 | 1.6113774 | 0.0011534 | 0.0199726 | 0.0159612 |
| G0:0007094mitotic sp | 34 | 0.7004935 | 1.9015949 | 0.0011547 | 0.0199726 | 0.0159612 |

|                      |     |           |           |           |           |           |
|----------------------|-----|-----------|-----------|-----------|-----------|-----------|
| G0:0031577spindle ch | 34  | 0.7004935 | 1.9015949 | 0.0011547 | 0.0199726 | 0.0159612 |
| G0:0032212positive r | 34  | 0.607018  | 1.6478415 | 0.0011547 | 0.0199726 | 0.0159612 |
| G0:0071177spindle as | 34  | 0.7004935 | 1.9015949 | 0.0011547 | 0.0199726 | 0.0159612 |
| G0:0071174mitotic sp | 34  | 0.7004935 | 1.9015949 | 0.0011547 | 0.0199726 | 0.0159612 |
| G0:0007145female mei | 27  | 0.6501417 | 1.7027194 | 0.0011574 | 0.0199726 | 0.0159612 |
| G0:0010971positive r | 27  | 0.6862868 | 1.7973835 | 0.0011574 | 0.0199726 | 0.0159612 |
| G0:0001785B cell apc | 24  | 0.6637282 | 1.6920109 | 0.0011751 | 0.0201602 | 0.0161112 |
| G0:0022616DNA strand | 26  | 0.6726491 | 1.7408723 | 0.0011751 | 0.0201602 | 0.0161112 |
| G0:0048243sperm capa | 25  | 0.681615  | 1.7533856 | 0.0011751 | 0.0201602 | 0.0161112 |
| G0:0043302positive r | 23  | 0.6749081 | 1.7043268 | 0.0011806 | 0.0201775 | 0.016125  |
| G0:0080154regulator  | 23  | 0.710758  | 1.7948577 | 0.0011806 | 0.0201775 | 0.016125  |
| G0:0006271DNA strand | 20  | 0.7037914 | 1.7225184 | 0.0012121 | 0.0206659 | 0.0165153 |
| G0:0006268DNA unwind | 13  | 0.7821697 | 1.7494763 | 0.0012255 | 0.0206659 | 0.0165153 |
| G0:0007106mitotic ce | 14  | 0.7226124 | 1.6442073 | 0.0012255 | 0.0206659 | 0.0165153 |
| G0:0048681negative r | 13  | 0.7423911 | 1.6605037 | 0.0012255 | 0.0206659 | 0.0165153 |
| G0:0071801regulator  | 14  | 0.7480644 | 1.7021199 | 0.0012255 | 0.0206659 | 0.0165153 |
| G0:1902965mitotic DN | 14  | 0.7468689 | 1.6993998 | 0.0012255 | 0.0206659 | 0.0165153 |
| G0:1904996positive r | 14  | 0.7526492 | 1.712552  | 0.0012255 | 0.0206659 | 0.0165153 |
| G0:1904874positive r | 15  | 0.7615943 | 1.7500545 | 0.00123   | 0.0207029 | 0.0165448 |
| G0:0000076DNA replic | 16  | 0.7290102 | 1.693201  | 0.0012376 | 0.0207781 | 0.016605  |
| G0:1900424regulator  | 17  | 0.7161513 | 1.6810438 | 0.0012392 | 0.0207781 | 0.016605  |
| G0:0051231spindle el | 9   | 0.8790786 | 1.8012716 | 0.00125   | 0.0208684 | 0.0166771 |
| G0:1900426positive r | 9   | 0.8882071 | 1.8199764 | 0.00125   | 0.0208684 | 0.0166771 |
| G0:0000727double-str | 11  | 0.8928008 | 1.9165653 | 0.0012547 | 0.0208684 | 0.0166771 |
| G0:0090594inflammato | 11  | 0.8307105 | 1.7832768 | 0.0012547 | 0.0208684 | 0.0166771 |
| G0:0000022mitotic sp | 8   | 0.9210718 | 1.8378553 | 0.0012563 | 0.0208684 | 0.0166771 |
| G0:0006267pre-replic | 7   | 0.912663  | 1.7618138 | 0.001287  | 0.0212594 | 0.0169896 |
| G0:0036388pre-replic | 7   | 0.912663  | 1.7618138 | 0.001287  | 0.0212594 | 0.0169896 |
| G0:1902295pre-replic | 7   | 0.912663  | 1.7618138 | 0.001287  | 0.0212594 | 0.0169896 |
| G0:0051256mitotic sp | 6   | 0.9331228 | 1.7389674 | 0.001328  | 0.0218963 | 0.0174986 |
| G0:0007265Ras protei | 423 | 0.3923055 | 1.3164508 | 0.001998  | 0.0320275 | 0.025595  |
| G0:0016571histone mc | 425 | 0.3945123 | 1.3244969 | 0.001998  | 0.0320275 | 0.025595  |
| G0:0043087regulator  | 439 | 0.3909462 | 1.313885  | 0.001998  | 0.0320275 | 0.025595  |
| G0:0043545regulator  | 808 | 0.3732496 | 1.268539  | 0.001998  | 0.0320275 | 0.025595  |
| G0:0050767regulator  | 769 | 0.3691493 | 1.2539741 | 0.001998  | 0.0320275 | 0.025595  |
| G0:0050766positive r | 445 | 0.3922241 | 1.3180151 | 0.001998  | 0.0320275 | 0.025595  |
| G0:0050776regulator  | 938 | 0.3602269 | 1.2290538 | 0.001998  | 0.0320275 | 0.025595  |
| G0:0051347positive r | 614 | 0.3829126 | 1.297137  | 0.001998  | 0.0320275 | 0.025595  |
| G0:0009101glycoprote | 323 | 0.4039578 | 1.3453741 | 0.002     | 0.0320275 | 0.025595  |
| G0:0018205peptidyl-s | 308 | 0.4143544 | 1.3796511 | 0.002     | 0.0320275 | 0.025595  |
| G0:0045085positive r | 355 | 0.4063041 | 1.3569159 | 0.002     | 0.0320275 | 0.025595  |
| G0:0051095regulator  | 354 | 0.4073175 | 1.360194  | 0.002     | 0.0320275 | 0.025595  |
| G0:0043585skin devel | 345 | 0.4126722 | 1.3758156 | 0.002002  | 0.0320275 | 0.025595  |
| G0:0002215activator  | 297 | 0.4210784 | 1.3970638 | 0.002004  | 0.0320275 | 0.025595  |
| G0:0009615response t | 296 | 0.4066659 | 1.3496329 | 0.002004  | 0.0320275 | 0.025595  |
| G0:0072655protein lc | 250 | 0.4195524 | 1.3853501 | 0.0020121 | 0.0320275 | 0.025595  |
| G0:0050792regulator  | 194 | 0.4477021 | 1.4647351 | 0.0020141 | 0.0320275 | 0.025595  |
| G0:0032385positive r | 207 | 0.4320113 | 1.419926  | 0.0020161 | 0.0320275 | 0.025595  |
| G0:0036294cellular r | 199 | 0.4466344 | 1.4645867 | 0.0020161 | 0.0320275 | 0.025595  |
| G0:0071455cellular r | 216 | 0.4306853 | 1.4162437 | 0.0020161 | 0.0320275 | 0.025595  |
| G0:0050926regulator  | 201 | 0.4427464 | 1.4516733 | 0.0020182 | 0.0320275 | 0.025595  |

|                      |     |           |           |           |           |           |
|----------------------|-----|-----------|-----------|-----------|-----------|-----------|
| G0:006049lregulator  | 164 | 0.4383994 | 1.41481   | 0.0020263 | 0.0321    | 0.0256529 |
| G0:005110lregulator  | 120 | 0.4756307 | 1.5086999 | 0.0020492 | 0.032404  | 0.0258959 |
| G0:000184lneural tuk | 103 | 0.492944  | 1.535628  | 0.0020855 | 0.0327559 | 0.0261771 |
| G0:003250DNA duplex  | 103 | 0.5085143 | 1.5841332 | 0.0020855 | 0.0327559 | 0.0261771 |
| G0:006198meiosis I   | 106 | 0.4772122 | 1.487229  | 0.0020855 | 0.0327559 | 0.0261771 |
| G0:000268regulator   | 105 | 0.4711962 | 1.4683514 | 0.0020899 | 0.0327559 | 0.0261771 |
| G0:005126lprotein de | 105 | 0.4692561 | 1.4623056 | 0.0020899 | 0.0327559 | 0.0261771 |
| G0:004205regulator   | 82  | 0.499251  | 1.5202855 | 0.0021322 | 0.0333606 | 0.0266604 |
| G0:000269positive r  | 83  | 0.5001495 | 1.5214888 | 0.002139  | 0.0333859 | 0.0266806 |
| G0:00069lactivator   | 81  | 0.4978164 | 1.513063  | 0.0021413 | 0.0333859 | 0.0266806 |
| G0:00614lregulator   | 73  | 0.5152172 | 1.5539575 | 0.0021598 | 0.0336154 | 0.026864  |
| G0:003503sperm-egg   | 52  | 0.5475533 | 1.5721517 | 0.0022247 | 0.0344181 | 0.0275054 |
| G0:004339negative r  | 53  | 0.5372948 | 1.5481741 | 0.0022247 | 0.0344181 | 0.0275054 |
| G0:00322lregulator   | 51  | 0.5419376 | 1.5495305 | 0.0022272 | 0.0344181 | 0.0275054 |
| G0:009032regulator   | 51  | 0.5312942 | 1.5190985 | 0.0022272 | 0.0344181 | 0.0275054 |
| G0:005143regulator   | 50  | 0.5422779 | 1.5476674 | 0.0022321 | 0.0344181 | 0.0275054 |
| G0:003265regulator   | 49  | 0.5353912 | 1.5268913 | 0.0022346 | 0.0344181 | 0.0275054 |
| G0:000834glial cell  | 46  | 0.5528238 | 1.5606812 | 0.0022624 | 0.034726  | 0.0277515 |
| G0:009038phagosome   | 43  | 0.5579312 | 1.562117  | 0.0022624 | 0.034726  | 0.0277515 |
| G0:000038spliceosom  | 38  | 0.5719064 | 1.5807364 | 0.0022857 | 0.0348649 | 0.0278625 |
| G0:001580neutral an  | 38  | 0.5701456 | 1.5758697 | 0.0022857 | 0.0348649 | 0.0278625 |
| G0:003300regulator   | 31  | 0.6186457 | 1.6649639 | 0.0022857 | 0.0348649 | 0.0278625 |
| G0:000013establishm  | 29  | 0.6104498 | 1.6208779 | 0.0022989 | 0.0348649 | 0.0278625 |
| G0:003357response t  | 39  | 0.5660261 | 1.5672503 | 0.0022989 | 0.0348649 | 0.0278625 |
| G0:004574positive r  | 35  | 0.5801612 | 1.5809233 | 0.0023015 | 0.0348649 | 0.0278625 |
| G0:005129establishm  | 35  | 0.5997643 | 1.6343414 | 0.0023015 | 0.0348649 | 0.0278625 |
| G0:001657histone ph  | 36  | 0.5714884 | 1.5622643 | 0.0023041 | 0.0348649 | 0.0278625 |
| G0:200024regulator   | 37  | 0.5667036 | 1.5533069 | 0.0023068 | 0.0348649 | 0.0278625 |
| G0:199077response t  | 26  | 0.6352015 | 1.6439549 | 0.0023502 | 0.0354601 | 0.0283382 |
| G0:007145protein lc  | 20  | 0.6821142 | 1.6694639 | 0.0024242 | 0.0365157 | 0.0291817 |
| G0:003293positive r  | 19  | 0.7043096 | 1.695735  | 0.002451  | 0.0366082 | 0.0292557 |
| G0:005138kinetochor  | 19  | 0.7126132 | 1.7157273 | 0.002451  | 0.0366082 | 0.0292557 |
| G0:007135cellular r  | 13  | 0.7234254 | 1.6180832 | 0.002451  | 0.0366082 | 0.0292557 |
| G0:190481regulator   | 13  | 0.7309359 | 1.6348818 | 0.002451  | 0.0366082 | 0.0292557 |
| G0:190552positive r  | 19  | 0.7046176 | 1.6964765 | 0.002451  | 0.0366082 | 0.0292557 |
| G0:000246germinal c  | 15  | 0.7214913 | 1.6579025 | 0.00246   | 0.0366816 | 0.0293144 |
| G0:007020establishm  | 16  | 0.7213091 | 1.6753144 | 0.0024752 | 0.0368307 | 0.0294335 |
| G0:007269protein lc  | 12  | 0.8056555 | 1.7684195 | 0.0024783 | 0.0368307 | 0.0294335 |
| G0:199017protein lc  | 11  | 0.7945367 | 1.705623  | 0.0025094 | 0.0370916 | 0.029642  |
| G0:190000regulator   | 8   | 0.8220308 | 1.6402344 | 0.0025126 | 0.0370916 | 0.029642  |
| G0:190012positive r  | 8   | 0.8564171 | 1.7088469 | 0.0025126 | 0.0370916 | 0.029642  |
| G0:190257lregulator  | 8   | 0.8220308 | 1.6402344 | 0.0025126 | 0.0370916 | 0.029642  |
| G0:000224wound heal  | 7   | 0.8340042 | 1.6099701 | 0.002574  | 0.0378102 | 0.0302163 |
| G0:004477lmeiotic ce | 7   | 0.8812166 | 1.7011094 | 0.002574  | 0.0378102 | 0.0302163 |
| G0:190199regulator   | 7   | 0.8812166 | 1.7011094 | 0.002574  | 0.0378102 | 0.0302163 |
| G0:000091assembly c  | 6   | 0.8581879 | 1.5993188 | 0.002656  | 0.0386955 | 0.0309238 |
| G0:000091factomyosin | 6   | 0.8581879 | 1.5993188 | 0.002656  | 0.0386955 | 0.0309238 |
| G0:000277antimicrob  | 6   | 0.8844694 | 1.6482971 | 0.002656  | 0.0386955 | 0.0309238 |
| G0:000277antibacter  | 6   | 0.8844694 | 1.6482971 | 0.002656  | 0.0386955 | 0.0309238 |
| G0:200118regulator   | 6   | 0.8733954 | 1.6276595 | 0.002656  | 0.0386955 | 0.0309238 |
| G0:000734egg activat | 5   | 0.8886399 | 1.6037883 | 0.0027064 | 0.0392356 | 0.0313554 |



|           |            |     |           |           |           |           |           |
|-----------|------------|-----|-----------|-----------|-----------|-----------|-----------|
| G0:003423 | macrophage | 5   | 0.9307701 | 1.6798236 | 0.0027064 | 0.0392356 | 0.0313554 |
| G0:200035 | regulator  | 5   | 0.9222403 | 1.6644292 | 0.0027064 | 0.0392356 | 0.0313554 |
| G0:001605 | Wnt signal | 492 | 0.3872642 | 1.3038651 | 0.002997  | 0.0429923 | 0.0343576 |
| G0:004363 | modificati | 587 | 0.380908  | 1.2885829 | 0.002997  | 0.0429923 | 0.0343576 |
| G0:004425 | cellular p | 716 | 0.3812777 | 1.2942405 | 0.002997  | 0.0429923 | 0.0343576 |
| G0:000700 | mitochondr | 475 | 0.3846959 | 1.2933558 | 0.003     | 0.0429923 | 0.0343576 |
| G0:003295 | regulator  | 318 | 0.4038532 | 1.345185  | 0.003     | 0.0429923 | 0.0343576 |
| G0:004578 | positive r | 388 | 0.3964284 | 1.3258701 | 0.003003  | 0.0429923 | 0.0343576 |
| G0:001810 | peptidyl-s | 287 | 0.4166409 | 1.3832391 | 0.003006  | 0.0429923 | 0.0343576 |
| G0:000275 | innate imm | 278 | 0.4110321 | 1.3618308 | 0.003009  | 0.0429923 | 0.0343576 |
| G0:190210 | regulator  | 259 | 0.4129189 | 1.3653613 | 0.003009  | 0.0429923 | 0.0343576 |
| G0:003021 | T cell dif | 228 | 0.4235851 | 1.3951409 | 0.0030181 | 0.0430529 | 0.034406  |
| G0:004362 | cellular p | 211 | 0.4267405 | 1.4027768 | 0.0030272 | 0.0430885 | 0.0344344 |
| G0:190370 | positive r | 176 | 0.4355335 | 1.4123223 | 0.0030303 | 0.0430885 | 0.0344344 |
| G0:009026 | positive r | 140 | 0.4564942 | 1.4632803 | 0.0030426 | 0.0431003 | 0.0344439 |
| G0:003514 | tube forme | 145 | 0.4597311 | 1.4751831 | 0.0030457 | 0.0431003 | 0.0344439 |
| G0:200105 | positive r | 137 | 0.4645543 | 1.4883143 | 0.0030457 | 0.0431003 | 0.0344439 |
| G0:200024 | regulator  | 131 | 0.4630147 | 1.4771124 | 0.0030644 | 0.0431066 | 0.0344489 |
| G0:000709 | centrosome | 122 | 0.4711392 | 1.4973242 | 0.0030675 | 0.0431066 | 0.0344489 |
| G0:003227 | positive r | 124 | 0.4801612 | 1.5292463 | 0.0030675 | 0.0431066 | 0.0344489 |
| G0:004328 | positive r | 124 | 0.4636139 | 1.4765454 | 0.0030675 | 0.0431066 | 0.0344489 |
| G0:003102 | microtubul | 129 | 0.4579811 | 1.4577005 | 0.0030706 | 0.0431066 | 0.0344489 |
| G0:003260 | type I int | 119 | 0.4736863 | 1.5002864 | 0.0030801 | 0.0431066 | 0.0344489 |
| G0:190547 | positive r | 119 | 0.4726514 | 1.4970087 | 0.0030801 | 0.0431066 | 0.0344489 |
| G0:003247 | regulator  | 117 | 0.4807359 | 1.5184706 | 0.0030928 | 0.0432163 | 0.0345366 |
| G0:007188 | leukocyte  | 103 | 0.4885915 | 1.5220693 | 0.0031283 | 0.0436434 | 0.0348779 |
| G0:000700 | mitochondr | 105 | 0.4656764 | 1.4511504 | 0.0031348 | 0.043666  | 0.034896  |
| G0:000184 | neural tut | 88  | 0.4866405 | 1.4892962 | 0.0031813 | 0.044245  | 0.0353587 |
| G0:004814 | regulator  | 79  | 0.5019394 | 1.5252623 | 0.0032154 | 0.0446493 | 0.0356818 |
| G0:003111 | regulator  | 75  | 0.4995408 | 1.5092301 | 0.0032293 | 0.0447716 | 0.0357795 |
| G0:004678 | microtubul | 73  | 0.511189  | 1.5418079 | 0.0032397 | 0.0448467 | 0.0358395 |
| G0:001814 | peptide cr | 53  | 0.5291688 | 1.5247598 | 0.003337  | 0.0461217 | 0.0368585 |
| G0:003220 | positive r | 48  | 0.546157  | 1.5547907 | 0.0033445 | 0.0461528 | 0.0368833 |
| G0:190551 | macrophage | 47  | 0.5512559 | 1.565144  | 0.003352  | 0.0461842 | 0.0369084 |
| G0:009019 | regulator  | 46  | 0.5414448 | 1.5285569 | 0.0033937 | 0.0466865 | 0.0373099 |
| G0:005144 | regulator  | 44  | 0.5507189 | 1.5448497 | 0.0034014 | 0.0467201 | 0.0373367 |
| G0:190165 | glycosyl c | 45  | 0.5433138 | 1.5264667 | 0.003413  | 0.0468072 | 0.0374063 |
| G0:003026 | chromosome | 33  | 0.605405  | 1.6401622 | 0.0034562 | 0.0472545 | 0.0377638 |
| G0:007031 | negative r | 36  | 0.5654476 | 1.5457509 | 0.0034562 | 0.0472545 | 0.0377638 |
| G0:004406 | modulator  | 25  | 0.6260809 | 1.6105297 | 0.0035253 | 0.0480507 | 0.0384    |
| G0:006014 | positive r | 25  | 0.6294007 | 1.6190695 | 0.0035253 | 0.0480507 | 0.0384    |
| G0:003292 | regulator  | 22  | 0.6360387 | 1.5978704 | 0.0035419 | 0.0480565 | 0.0384046 |
| G0:003362 | integrin e | 22  | 0.6349974 | 1.5952546 | 0.0035419 | 0.0480565 | 0.0384046 |
| G0:007019 | establishm | 22  | 0.632607  | 1.5892493 | 0.0035419 | 0.0480565 | 0.0384046 |
| G0:006071 | labyrinthi | 20  | 0.6631693 | 1.6230964 | 0.0036364 | 0.0492627 | 0.0393687 |
| G0:009067 | RNA locali | 19  | 0.6833741 | 1.6453296 | 0.0036765 | 0.0495042 | 0.0395616 |
| G0:009067 | telomerase | 19  | 0.6833741 | 1.6453296 | 0.0036765 | 0.0495042 | 0.0395616 |
| G0:009067 | telomerase | 19  | 0.6833741 | 1.6453296 | 0.0036765 | 0.0495042 | 0.0395616 |
| G0:009068 | RNA locali | 19  | 0.6833741 | 1.6453296 | 0.0036765 | 0.0495042 | 0.0395616 |
| G0:005129 | centrosome | 15  | 0.6865512 | 1.5776143 | 0.00369   | 0.0495368 | 0.0395877 |
| G0:006026 | regulator  | 15  | 0.6895944 | 1.5846071 | 0.00369   | 0.0495368 | 0.0395877 |

|           |            |     |           |           |           |           |           |
|-----------|------------|-----|-----------|-----------|-----------|-----------|-----------|
| G0:190340 | protein lc | 10  | 0.8061994 | 1.6949717 | 0.0037083 | 0.0495467 | 0.0395956 |
| G0:190485 | positive r | 10  | 0.8061994 | 1.6949717 | 0.0037083 | 0.0495467 | 0.0395956 |
| G0:190486 | protein lc | 10  | 0.8061994 | 1.6949717 | 0.0037083 | 0.0495467 | 0.0395956 |
| G0:000714 | female mei | 8   | 0.8136416 | 1.6234951 | 0.0037688 | 0.0495467 | 0.0395956 |
| G0:001718 | peptidyl-l | 8   | 0.8149493 | 1.6261043 | 0.0037688 | 0.0495467 | 0.0395956 |
| G0:200069 | positive r | 8   | 0.8096572 | 1.6155449 | 0.0037688 | 0.0495467 | 0.0395956 |
| G0:200117 | regulation | 8   | 0.8135596 | 1.6233313 | 0.0037688 | 0.0495467 | 0.0395956 |
| G0:000600 | fructose c | 5   | -0.969122 | -1.972291 | 0.0038023 | 0.0495467 | 0.0395956 |
| G0:000652 | alanine me | 5   | -0.981651 | -1.997788 | 0.0038023 | 0.0495467 | 0.0395956 |
| G0:000652 | alanine ca | 5   | -0.981651 | -1.997788 | 0.0038023 | 0.0495467 | 0.0395956 |
| G0:000652 | arginine k | 5   | -0.954931 | -1.94341  | 0.0038023 | 0.0495467 | 0.0395956 |
| G0:000657 | tyrosine c | 5   | -0.950552 | -1.934497 | 0.0038023 | 0.0495467 | 0.0395956 |
| G0:000907 | pyruvate f | 5   | -0.981651 | -1.997788 | 0.0038023 | 0.0495467 | 0.0395956 |
| G0:000908 | pyruvate f | 5   | -0.981651 | -1.997788 | 0.0038023 | 0.0495467 | 0.0395956 |
| G0:001089 | negative r | 5   | -0.933022 | -1.898822 | 0.0038023 | 0.0495467 | 0.0395956 |
| G0:001090 | regulation | 5   | -0.96757  | -1.969132 | 0.0038023 | 0.0495467 | 0.0395956 |
| G0:001609 | monoterper | 5   | -0.98115  | -1.99677  | 0.0038023 | 0.0495467 | 0.0395956 |
| G0:004532 | carnitine  | 5   | -0.931576 | -1.89588  | 0.0038023 | 0.0495467 | 0.0395956 |
| G0:006162 | fructose c | 5   | -0.969122 | -1.972291 | 0.0038023 | 0.0495467 | 0.0395956 |
| G0:190152 | icosanoid  | 5   | -0.975549 | -1.985371 | 0.0038023 | 0.0495467 | 0.0395956 |
| G0:000651 | peptide me | 748 | 0.3693512 | 1.2542337 | 0.003996  | 0.0504004 | 0.0402778 |
| G0:001656 | protein uk | 751 | 0.3709271 | 1.2595719 | 0.003996  | 0.0504004 | 0.0402778 |
| G0:001994 | modificati | 579 | 0.3790095 | 1.2813111 | 0.003996  | 0.0504004 | 0.0402778 |
| G0:005160 | proteolysi | 662 | 0.3718793 | 1.2614818 | 0.003996  | 0.0504004 | 0.0402778 |
| G0:019873 | cell-cell  | 494 | 0.3881954 | 1.3069408 | 0.003996  | 0.0504004 | 0.0402778 |
| G0:190113 | carbohydr  | 708 | 0.3727992 | 1.2658515 | 0.003996  | 0.0504004 | 0.0402778 |
| G0:190253 | positive r | 999 | 0.3531234 | 1.2062149 | 0.003996  | 0.0504004 | 0.0402778 |
| G0:000910 | glycoprote | 386 | 0.3950767 | 1.3223324 | 0.004     | 0.0504004 | 0.0402778 |
| G0:001025 | endomembra | 398 | 0.3960754 | 1.3267459 | 0.004     | 0.0504004 | 0.0402778 |
| G0:001905 | viral life | 311 | 0.4025324 | 1.3399937 | 0.004     | 0.0504004 | 0.0402778 |
| G0:003009 | lymphocyte | 336 | 0.4020134 | 1.3410221 | 0.004     | 0.0504004 | 0.0402778 |
| G0:003134 | positive r | 473 | 0.3819671 | 1.2837395 | 0.004     | 0.0504004 | 0.0402778 |
| G0:006027 | cilium ass | 330 | 0.4032548 | 1.3443228 | 0.004     | 0.0504004 | 0.0402778 |
| G0:007099 | neuron de  | 332 | 0.4000895 | 1.3334447 | 0.004     | 0.0504004 | 0.0402778 |
| G0:003297 | regulation | 360 | 0.395839  | 1.3218774 | 0.004004  | 0.0504004 | 0.0402778 |
| G0:004478 | cilium org | 347 | 0.3969124 | 1.3232626 | 0.004004  | 0.0504004 | 0.0402778 |
| G0:000293 | lipid hydr | 6   | -0.975053 | -2.106555 | 0.0040161 | 0.0504004 | 0.0402778 |
| G0:000653 | aspartate  | 6   | -0.950868 | -2.054305 | 0.0040161 | 0.0504004 | 0.0402778 |
| G0:000969 | phenylprop | 6   | -0.939711 | -2.030201 | 0.0040161 | 0.0504004 | 0.0402778 |
| G0:000980 | coumarin n | 6   | -0.939711 | -2.030201 | 0.0040161 | 0.0504004 | 0.0402778 |
| G0:000982 | alkaloid n | 6   | -0.940933 | -2.032841 | 0.0040161 | 0.0504004 | 0.0402778 |
| G0:004206 | gliogenesi | 275 | 0.409129  | 1.3536739 | 0.0040161 | 0.0504004 | 0.0402778 |
| G0:004242 | choline ca | 6   | -0.905325 | -1.955912 | 0.0040161 | 0.0504004 | 0.0402778 |
| G0:004611 | nucleobase | 6   | -0.929999 | -2.009218 | 0.0040161 | 0.0504004 | 0.0402778 |
| G0:007135 | cellular r | 270 | 0.4088098 | 1.3507265 | 0.0040201 | 0.0504004 | 0.0402778 |
| G0:000724 | I-kappaB k | 254 | 0.4116448 | 1.358978  | 0.0040241 | 0.0504004 | 0.0402778 |
| G0:005140 | neuron apc | 228 | 0.4195024 | 1.3816937 | 0.0040241 | 0.0504004 | 0.0402778 |
| G0:007121 | cellular r | 197 | 0.4236115 | 1.3879479 | 0.0040282 | 0.0504004 | 0.0402778 |
| G0:200123 | negative r | 216 | 0.4198311 | 1.3805514 | 0.0040323 | 0.0504004 | 0.0402778 |
| G0:004610 | thymidine  | 5   | 0.873854  | 1.5771033 | 0.0040595 | 0.0504041 | 0.0402808 |
| G0:004612 | pyrimidine | 5   | 0.873854  | 1.5771033 | 0.0040595 | 0.0504041 | 0.0402808 |

|            |             |     |           |           |           |           |           |
|------------|-------------|-----|-----------|-----------|-----------|-----------|-----------|
| GO:006174  | motor learn | 5   | 0.8711758 | 1.5722698 | 0.0040595 | 0.0504041 | 0.0402808 |
| GO:0008037 | cell recog  | 145 | 0.4498644 | 1.4435228 | 0.0040609 | 0.0504041 | 0.0402808 |
| GO:190390  | regulator   | 137 | 0.4542645 | 1.4553484 | 0.0040609 | 0.0504041 | 0.0402808 |
| GO:003112  | RNA 3'-end  | 134 | 0.4621514 | 1.47603   | 0.0040858 | 0.0506235 | 0.0404561 |
| GO:004558  | regulator   | 132 | 0.4601963 | 1.4678429 | 0.00409   | 0.0506235 | 0.0404561 |
| GO:0008637 | apoptotic   | 112 | 0.4680503 | 1.4718026 | 0.004128  | 0.0510226 | 0.040775  |
| GO:0048524 | positive r  | 104 | 0.4666931 | 1.4553556 | 0.004171  | 0.051483  | 0.041143  |
| GO:003153  | actin cyto  | 99  | 0.4868035 | 1.5111674 | 0.0041885 | 0.0516095 | 0.0412441 |
| GO:0120034 | positive r  | 95  | 0.4716493 | 1.4580461 | 0.0041929 | 0.0516095 | 0.0412441 |
| GO:006060  | tube close  | 89  | 0.4865577 | 1.4888875 | 0.0042508 | 0.0522501 | 0.041756  |
| GO:003260  | chemokine   | 82  | 0.4917302 | 1.4973837 | 0.0042644 | 0.0523448 | 0.0418317 |
| GO:0048144 | fibroblast  | 80  | 0.4944455 | 1.5039    | 0.0042918 | 0.0526091 | 0.0420429 |
| GO:0033627 | cell adhes  | 64  | 0.5080939 | 1.5052506 | 0.0043621 | 0.0533961 | 0.0426718 |
| GO:0061077 | chaperone-  | 54  | 0.5277651 | 1.527524  | 0.0044395 | 0.0542552 | 0.0433584 |
| GO:000657  | amino-acid  | 7   | -0.897423 | -2.029131 | 0.0044444 | 0.0542552 | 0.0433584 |
| GO:003111  | regulator   | 48  | 0.5295303 | 1.507458  | 0.0044593 | 0.0543481 | 0.0434326 |
| GO:003019  | collagen f  | 50  | 0.5298827 | 1.5122913 | 0.0044643 | 0.0543481 | 0.0434326 |
| GO:000701  | microtubul  | 42  | 0.5452762 | 1.5184132 | 0.0045662 | 0.0555129 | 0.0443635 |
| GO:0000027 | ribosomal   | 28  | 0.6111719 | 1.6134743 | 0.0045924 | 0.0557553 | 0.0445572 |
| GO:000008  | regulator   | 27  | 0.6235632 | 1.6331105 | 0.0046296 | 0.0559776 | 0.0447349 |
| GO:003267  | regulator   | 27  | 0.6154821 | 1.6119461 | 0.0046296 | 0.0559776 | 0.0447349 |
| GO:0051984 | positive r  | 27  | 0.6190202 | 1.6212124 | 0.0046296 | 0.0559776 | 0.0447349 |
| GO:000151  | prostaglan  | 24  | 0.6276758 | 1.6001042 | 0.0047004 | 0.0566017 | 0.0452336 |
| GO:001812  | protein hy  | 24  | 0.6317131 | 1.6103963 | 0.0047004 | 0.0566017 | 0.0452336 |
| GO:0046457 | prostanoid  | 24  | 0.6276758 | 1.6001042 | 0.0047004 | 0.0566017 | 0.0452336 |
| GO:0001561 | fatty acid  | 8   | -0.870609 | -1.998637 | 0.0048544 | 0.0568968 | 0.0454695 |
| GO:000654  | histidine   | 8   | -0.915336 | -2.101315 | 0.0048544 | 0.0568968 | 0.0454695 |
| GO:001962  | short-chain | 8   | -0.934021 | -2.14421  | 0.0048544 | 0.0568968 | 0.0454695 |
| GO:005280  | imidazole-  | 8   | -0.915336 | -2.101315 | 0.0048544 | 0.0568968 | 0.0454695 |
| GO:0070327 | thyroid ho  | 8   | -0.859584 | -1.973327 | 0.0048544 | 0.0568968 | 0.0454695 |
| GO:000005  | urea cycle  | 11  | -0.866825 | -2.211816 | 0.004878  | 0.0568968 | 0.0454695 |
| GO:003353  | fatty acid  | 11  | -0.920081 | -2.347706 | 0.004878  | 0.0568968 | 0.0454695 |
| GO:004591  | positive r  | 11  | -0.76758  | -1.95858  | 0.004878  | 0.0568968 | 0.0454695 |
| GO:004618  | aldehyde c  | 11  | -0.761947 | -1.944207 | 0.004878  | 0.0568968 | 0.0454695 |
| GO:004695  | cellular k  | 11  | -0.759573 | -1.93815  | 0.004878  | 0.0568968 | 0.0454695 |
| GO:007018  | kynurenine  | 11  | -0.739603 | -1.887194 | 0.004878  | 0.0568968 | 0.0454695 |
| GO:190156  | fatty acid  | 11  | -0.749546 | -1.912564 | 0.004878  | 0.0568968 | 0.0454695 |
| GO:006025  | positive r  | 15  | 0.6824839 | 1.568268  | 0.00492   | 0.0568968 | 0.0454695 |
| GO:0002291 | T cell act  | 10  | 0.7968807 | 1.6753799 | 0.0049444 | 0.0568968 | 0.0454695 |
| GO:001969  | choline me  | 9   | -0.827043 | -1.966479 | 0.0049505 | 0.0568968 | 0.0454695 |
| GO:003438  | chylomicro  | 9   | -0.944616 | -2.246036 | 0.0049505 | 0.0568968 | 0.0454695 |
| GO:0046487 | glyoxylate  | 9   | -0.910017 | -2.163768 | 0.0049505 | 0.0568968 | 0.0454695 |
| GO:007183  | triglyceri  | 9   | -0.944616 | -2.246036 | 0.0049505 | 0.0568968 | 0.0454695 |
| GO:009020  | negative r  | 9   | -0.880881 | -2.094491 | 0.0049505 | 0.0568968 | 0.0454695 |
| GO:0097267 | omega-hydr  | 9   | -0.936945 | -2.227795 | 0.0049505 | 0.0568968 | 0.0454695 |
| GO:190481  | positive r  | 12  | 0.7727396 | 1.6961689 | 0.0049566 | 0.0568968 | 0.0454695 |
| GO:0006511 | ubiquitin-  | 573 | 0.3782779 | 1.2784754 | 0.004995  | 0.0568968 | 0.0454695 |
| GO:001995  | sexual rep  | 758 | 0.3677215 | 1.2486036 | 0.004995  | 0.0568968 | 0.0454695 |
| GO:0032504 | multicellu  | 768 | 0.3652336 | 1.2406547 | 0.004995  | 0.0568968 | 0.0454695 |
| GO:004860  | multicellu  | 753 | 0.3646388 | 1.2381648 | 0.004995  | 0.0568968 | 0.0454695 |
| GO:003238  | regulator   | 405 | 0.3911791 | 1.3114433 | 0.005     | 0.0568968 | 0.0454695 |

|                      |     |           |           |           |           |           |
|----------------------|-----|-----------|-----------|-----------|-----------|-----------|
| GO:0043405regulation | 320 | 0.3906517 | 1.300665  | 0.005     | 0.0568968 | 0.0454695 |
| GO:0051255spindle mi | 9   | 0.8178117 | 1.675733  | 0.005     | 0.0568968 | 0.0454695 |
| GO:0060076canonical  | 318 | 0.3933586 | 1.310229  | 0.005     | 0.0568968 | 0.0454695 |
| GO:1904865regulation | 9   | 0.8224563 | 1.6852501 | 0.005     | 0.0568968 | 0.0454695 |
| GO:1904871positive r | 9   | 0.8224563 | 1.6852501 | 0.005     | 0.0568968 | 0.0454695 |
| GO:1904951positive r | 437 | 0.3819645 | 1.2834413 | 0.005     | 0.0568968 | 0.0454695 |
| GO:1901214regulation | 298 | 0.3979231 | 1.32099   | 0.005005  | 0.0568968 | 0.0454695 |
| GO:0060825regulation | 271 | 0.4050588 | 1.3382932 | 0.0050251 | 0.0568968 | 0.0454695 |
| GO:1904776regulation | 8   | 0.804465  | 1.6051846 | 0.0050251 | 0.0568968 | 0.0454695 |
| GO:0043122regulation | 224 | 0.4163015 | 1.3699953 | 0.0050352 | 0.0568968 | 0.0454695 |
| GO:0060566developmer | 226 | 0.4162984 | 1.3700849 | 0.0050352 | 0.0568968 | 0.0454695 |
| GO:0043525regulation | 200 | 0.4150731 | 1.3610575 | 0.0050454 | 0.0568968 | 0.0454695 |
| GO:0044706multi-mult | 208 | 0.4141863 | 1.361172  | 0.0050454 | 0.0568968 | 0.0454695 |
| GO:0051701interactio | 200 | 0.416033  | 1.3642049 | 0.0050454 | 0.0568968 | 0.0454695 |
| GO:1902905positive r | 191 | 0.4376006 | 1.4275027 | 0.0050505 | 0.0568968 | 0.0454695 |
| GO:1903326regulation | 213 | 0.4180743 | 1.3742665 | 0.0050505 | 0.0568968 | 0.0454695 |
| GO:0120032regulation | 162 | 0.4348501 | 1.403483  | 0.0050607 | 0.0568968 | 0.0454695 |
| GO:0051095positive r | 171 | 0.4296854 | 1.391322  | 0.0050659 | 0.0568968 | 0.0454695 |
| GO:0061025membrane f | 143 | 0.4477782 | 1.4360177 | 0.005071  | 0.0568968 | 0.0454695 |
| GO:0002262myeloid ce | 138 | 0.4491868 | 1.4386808 | 0.0050813 | 0.0568968 | 0.0454695 |
| GO:0071706tumor necr | 147 | 0.4440683 | 1.4244939 | 0.0050813 | 0.0568968 | 0.0454695 |
| GO:0034626cellular r | 132 | 0.447341  | 1.4268397 | 0.0051125 | 0.0568968 | 0.0454695 |
| GO:0006065uronic aci | 17  | -0.71688  | -2.133498 | 0.0051282 | 0.0568968 | 0.0454695 |
| GO:0006065ethanol ox | 12  | -0.849154 | -2.24626  | 0.0051282 | 0.0568968 | 0.0454695 |
| GO:0006544glycine me | 17  | -0.808171 | -2.405188 | 0.0051282 | 0.0568968 | 0.0454695 |
| GO:0006554lysine cat | 12  | -0.864207 | -2.286081 | 0.0051282 | 0.0568968 | 0.0454695 |
| GO:0006577amino-acid | 17  | -0.864376 | -2.572458 | 0.0051282 | 0.0568968 | 0.0454695 |
| GO:0010896regulation | 12  | -0.760421 | -2.011535 | 0.0051282 | 0.0568968 | 0.0454695 |
| GO:0015697quaternary | 12  | -0.748791 | -1.98077  | 0.0051282 | 0.0568968 | 0.0454695 |
| GO:0019585glucuronat | 17  | -0.71688  | -2.133498 | 0.0051282 | 0.0568968 | 0.0454695 |
| GO:0032372negative r | 12  | -0.82606  | -2.18517  | 0.0051282 | 0.0568968 | 0.0454695 |
| GO:0032375negative r | 12  | -0.82606  | -2.18517  | 0.0051282 | 0.0568968 | 0.0454695 |
| GO:0033706phospholip | 12  | -0.725927 | -1.920289 | 0.0051282 | 0.0568968 | 0.0454695 |
| GO:0034372very-low-c | 12  | -0.793658 | -2.099458 | 0.0051282 | 0.0568968 | 0.0454695 |
| GO:0052805imidazole- | 12  | -0.888542 | -2.350454 | 0.0051282 | 0.0568968 | 0.0454695 |
| GO:0070985oxidative  | 17  | -0.835127 | -2.485413 | 0.0051282 | 0.0568968 | 0.0454695 |
| GO:1902224ketone bod | 12  | -0.744446 | -1.969277 | 0.0051282 | 0.0568968 | 0.0454695 |
| GO:00061052-oxogluta | 16  | -0.841645 | -2.453823 | 0.0051546 | 0.0569059 | 0.0454768 |
| GO:0043645dicarboxyl | 16  | -0.719881 | -2.098819 | 0.0051546 | 0.0569059 | 0.0454768 |
| GO:0043691reverse ch | 16  | -0.745282 | -2.172877 | 0.0051546 | 0.0569059 | 0.0454768 |
| GO:0046455short-chai | 16  | -0.788035 | -2.297524 | 0.0051546 | 0.0569059 | 0.0454768 |
| GO:0006547histidine  | 10  | -0.90144  | -2.196988 | 0.0051813 | 0.057059  | 0.0455991 |
| GO:0006576tyrosine m | 10  | -0.943995 | -2.300704 | 0.0051813 | 0.057059  | 0.0455991 |
| GO:0007127meiosis I  | 101 | 0.471421  | 1.4675029 | 0.0052029 | 0.0572256 | 0.0457322 |
| GO:0006495protein O- | 96  | 0.4629904 | 1.431635  | 0.0052411 | 0.0572897 | 0.0457834 |
| GO:1990865response t | 94  | 0.4749897 | 1.4650511 | 0.0052743 | 0.0572897 | 0.0457834 |
| GO:1990865cellular r | 94  | 0.4749897 | 1.4650511 | 0.0052743 | 0.0572897 | 0.0457834 |
| GO:0061687detoxifica | 15  | -0.748304 | -2.113455 | 0.005291  | 0.0572897 | 0.0457834 |
| GO:0071674mononuclea | 82  | 0.4801407 | 1.4620922 | 0.0053305 | 0.0572897 | 0.0457834 |
| GO:2000106regulation | 82  | 0.4828205 | 1.4702526 | 0.0053305 | 0.0572897 | 0.0457834 |
| GO:1903557positive r | 83  | 0.4859757 | 1.4783711 | 0.0053476 | 0.0572897 | 0.0457834 |

|                      |     |           |           |           |           |           |
|----------------------|-----|-----------|-----------|-----------|-----------|-----------|
| G0:0000097sulfur ami | 14  | -0.777734 | -2.118087 | 0.0053763 | 0.0572897 | 0.0457834 |
| G0:0000098sulfur ami | 13  | -0.772721 | -2.063151 | 0.0053763 | 0.0572897 | 0.0457834 |
| G0:0001867complement | 13  | -0.817263 | -2.182078 | 0.0053763 | 0.0572897 | 0.0457834 |
| G0:0006525arginine n | 19  | -0.674349 | -2.064867 | 0.0053763 | 0.0572897 | 0.0457834 |
| G0:0006555lysine met | 13  | -0.850306 | -2.2703   | 0.0053763 | 0.0572897 | 0.0457834 |
| G0:0009071serine fan | 14  | -0.84598  | -2.303949 | 0.0053763 | 0.0572897 | 0.0457834 |
| G0:0009437carnitine  | 13  | -0.825221 | -2.203324 | 0.0053763 | 0.0572897 | 0.0457834 |
| G0:0010275detoxifica | 13  | -0.725092 | -1.935981 | 0.0053763 | 0.0572897 | 0.0457834 |
| G0:0015812gamma-amir | 13  | -0.78697  | -2.101195 | 0.0053763 | 0.0572897 | 0.0457834 |
| G0:0019375epoxygenas | 19  | -0.909565 | -2.785102 | 0.0053763 | 0.0572897 | 0.0457834 |
| G0:0019627urea metak | 13  | -0.865548 | -2.310997 | 0.0053763 | 0.0572897 | 0.0457834 |
| G0:0033546fatty acid | 14  | -0.749899 | -2.04228  | 0.0053763 | 0.0572897 | 0.0457834 |
| G0:0034376triglyceri | 14  | -0.812019 | -2.211459 | 0.0053763 | 0.0572897 | 0.0457834 |
| G0:0034374low-densit | 13  | -0.720531 | -1.923804 | 0.0053763 | 0.0572897 | 0.0457834 |
| G0:0034384high-densi | 13  | -0.890737 | -2.378251 | 0.0053763 | 0.0572897 | 0.0457834 |
| G0:0035112genitalia  | 13  | -0.707326 | -1.888547 | 0.0053763 | 0.0572897 | 0.0457834 |
| G0:0051917regulator  | 14  | -0.845791 | -2.303434 | 0.0053763 | 0.0572897 | 0.0457834 |
| G0:0071941nitrogen c | 14  | -0.865463 | -2.357011 | 0.0053763 | 0.0572897 | 0.0457834 |
| G0:1990165stress res | 13  | -0.725092 | -1.935981 | 0.0053763 | 0.0572897 | 0.0457834 |
| G0:0002312B cell act | 69  | 0.5003569 | 1.5015386 | 0.0053996 | 0.0574682 | 0.0459261 |
| G0:0032418lysosome l | 72  | 0.5042337 | 1.5177028 | 0.0054171 | 0.057586  | 0.0460203 |
| G0:0010324membrane i | 63  | 0.5061478 | 1.4970846 | 0.0054466 | 0.0576756 | 0.0460918 |
| G0:0032725positive r | 63  | 0.5083282 | 1.503534  | 0.0054466 | 0.0576756 | 0.0460918 |
| G0:0006555methionine | 18  | -0.687463 | -2.041955 | 0.0054645 | 0.0576756 | 0.0460918 |
| G0:0007597blood coag | 18  | -0.893118 | -2.652807 | 0.0054645 | 0.0576756 | 0.0460918 |
| G0:0034375high-densi | 18  | -0.691183 | -2.053005 | 0.0054645 | 0.0576756 | 0.0460918 |
| G0:0051957positive r | 18  | -0.785195 | -2.332245 | 0.0054645 | 0.0576756 | 0.0460918 |
| G0:0001836release of | 56  | 0.5225809 | 1.5215716 | 0.0055006 | 0.0579874 | 0.046341  |
| G0:0010805regulator  | 54  | 0.5231334 | 1.5141182 | 0.0055494 | 0.0584205 | 0.0466871 |
| G0:0007062sister chr | 53  | 0.5203289 | 1.4992881 | 0.0055617 | 0.0584205 | 0.0466871 |
| G0:0032665regulator  | 53  | 0.5267376 | 1.5177542 | 0.0055617 | 0.0584205 | 0.0466871 |
| G0:0018208peptidyl-r | 51  | 0.5235586 | 1.4969807 | 0.0055679 | 0.0584205 | 0.0466871 |
| G0:0006067ethanol me | 20  | -0.793269 | -2.461971 | 0.0056497 | 0.0592059 | 0.0473148 |
| G0:0043485RNA stabil | 43  | 0.5381111 | 1.5066239 | 0.0056561 | 0.0592059 | 0.0473148 |
| G0:0009165nucleoside | 41  | 0.546445  | 1.5200774 | 0.0057143 | 0.0596743 | 0.0476891 |
| G0:0045025G0 to G1 t | 41  | 0.5481073 | 1.5247015 | 0.0057143 | 0.0596743 | 0.0476891 |
| G0:0032801receptor c | 32  | 0.5884288 | 1.5916049 | 0.0057274 | 0.0597408 | 0.0477423 |
| G0:0070316regulator  | 39  | 0.5557279 | 1.5387359 | 0.0057471 | 0.0598766 | 0.0478508 |
| G0:1905521regulator  | 34  | 0.5761229 | 1.5639722 | 0.0057737 | 0.0600827 | 0.0480155 |
| G0:0018108peptidyl-t | 348 | 0.3895369 | 1.2990438 | 0.006006  | 0.0623441 | 0.0498227 |
| G0:0018212peptidyl-t | 351 | 0.3888866 | 1.2978644 | 0.006006  | 0.0623441 | 0.0498227 |
| G0:0034612response t | 287 | 0.4000814 | 1.3282618 | 0.006012  | 0.0623441 | 0.0498227 |
| G0:0071216cellular r | 220 | 0.4075114 | 1.3407801 | 0.0060484 | 0.0626382 | 0.0500578 |
| G0:0071222cellular r | 190 | 0.4218905 | 1.376194  | 0.0060545 | 0.0626382 | 0.0500578 |
| G0:0006395tRNA metak | 164 | 0.430175  | 1.3882681 | 0.006079  | 0.062819  | 0.0502022 |
| G0:0034256positive r | 141 | 0.4440683 | 1.4217483 | 0.0060976 | 0.0628643 | 0.0502384 |
| G0:1903555regulator  | 142 | 0.4497529 | 1.4406731 | 0.0060976 | 0.0628643 | 0.0502384 |
| G0:1904872regulator  | 18  | 0.6786073 | 1.6190755 | 0.006105  | 0.0628681 | 0.0502415 |
| G0:2000696regulator  | 19  | 0.6632186 | 1.596802  | 0.0061275 | 0.0630262 | 0.0503678 |
| G0:0034501protein lc | 16  | 0.6897491 | 1.6020132 | 0.0061881 | 0.0635767 | 0.0508077 |
| G0:0007175epidermal  | 115 | 0.4641315 | 1.4633092 | 0.0061983 | 0.0636082 | 0.0508329 |

|            |                        |     |           |           |           |           |           |
|------------|------------------------|-----|-----------|-----------|-----------|-----------|-----------|
| GO:006096  | regulation of          | 107 | 0.4596584 | 1.4340652 | 0.006237  | 0.0639311 | 0.051091  |
| GO:007020  | regulation of          | 11  | 0.7583187 | 1.6278742 | 0.0062735 | 0.0640241 | 0.0511653 |
| GO:0009081 | branched-chain         | 21  | -0.753603 | -2.319973 | 0.0062893 | 0.0640241 | 0.0511653 |
| GO:000908  | branched-chain         | 21  | -0.753603 | -2.319973 | 0.0062893 | 0.0640241 | 0.0511653 |
| GO:003112  | mRNA 3'-terminal       | 95  | 0.4646358 | 1.4363648 | 0.0062893 | 0.0640241 | 0.0511653 |
| GO:004213  | neurotransmission      | 21  | -0.827798 | -2.548384 | 0.0062893 | 0.0640241 | 0.0511653 |
| GO:004273  | exogenous              | 21  | -0.87421  | -2.691265 | 0.0062893 | 0.0640241 | 0.0511653 |
| GO:000906  | aspartate              | 23  | -0.792428 | -2.547059 | 0.0064516 | 0.0653768 | 0.0522463 |
| GO:000931  | amine catabolism       | 22  | -0.679019 | -2.145629 | 0.0064516 | 0.0653768 | 0.0522463 |
| GO:000940  | toxin metabolism       | 22  | -0.711316 | -2.247685 | 0.0064516 | 0.0653768 | 0.0522463 |
| GO:004253  | benzene catabolism     | 23  | -0.777141 | -2.497925 | 0.0064516 | 0.0653768 | 0.0522463 |
| GO:190374  | regulation of          | 70  | 0.4977789 | 1.4952477 | 0.0065076 | 0.065869  | 0.0526396 |
| GO:006184  | antimicrobial          | 61  | 0.5141178 | 1.5176402 | 0.0065359 | 0.0660542 | 0.0527877 |
| GO:004227  | ribosomal              | 62  | 0.5057605 | 1.4930055 | 0.0065502 | 0.0660542 | 0.0527877 |
| GO:003649  | IRE1-mediated          | 60  | 0.5106746 | 1.5077194 | 0.0065574 | 0.0660542 | 0.0527877 |
| GO:007267  | T cell migration       | 56  | 0.5202505 | 1.5147863 | 0.0066007 | 0.0660542 | 0.0527877 |
| GO:001572  | bile acid              | 26  | -0.814735 | -2.693993 | 0.0066225 | 0.0660542 | 0.0527877 |
| GO:003019  | positive regulation    | 26  | -0.648244 | -2.143476 | 0.0066225 | 0.0660542 | 0.0527877 |
| GO:003236  | negative regulation    | 25  | -0.701236 | -2.297077 | 0.0066225 | 0.0660542 | 0.0527877 |
| GO:004221  | cellular morphogenesis | 24  | -0.724386 | -2.361788 | 0.0066225 | 0.0660542 | 0.0527877 |
| GO:004243  | indole catabolism      | 24  | -0.648379 | -2.113976 | 0.0066225 | 0.0660542 | 0.0527877 |
| GO:004257  | retinoic acid          | 25  | -0.769517 | -2.520749 | 0.0066225 | 0.0660542 | 0.0527877 |
| GO:004592  | negative regulation    | 25  | -0.678903 | -2.22392  | 0.0066225 | 0.0660542 | 0.0527877 |
| GO:007137  | cellular morphogenesis | 26  | -0.656621 | -2.171176 | 0.0066225 | 0.0660542 | 0.0527877 |
| GO:190004  | positive regulation    | 26  | -0.648244 | -2.143476 | 0.0066225 | 0.0660542 | 0.0527877 |
| GO:004574  | positive regulation    | 30  | 0.5850044 | 1.5650234 | 0.0068493 | 0.0682398 | 0.0545343 |
| GO:190118  | positive regulation    | 32  | 0.5748792 | 1.5549553 | 0.0068729 | 0.0683976 | 0.0546604 |
| GO:000177  | myeloid development    | 28  | 0.596418  | 1.5745246 | 0.0068886 | 0.068478  | 0.0547246 |
| GO:004568  | positive regulation    | 35  | 0.5570301 | 1.5178917 | 0.0069045 | 0.0685589 | 0.0547893 |
| GO:004502  | early endosome         | 37  | 0.5419198 | 1.4853759 | 0.0069204 | 0.0685665 | 0.0547954 |
| GO:004824  | macrophage             | 34  | 0.56787   | 1.5415685 | 0.0069284 | 0.0685665 | 0.0547954 |
| GO:190103  | positive regulation    | 34  | 0.5616104 | 1.5245759 | 0.0069284 | 0.0685665 | 0.0547954 |
| GO:004232  | positive regulation    | 987 | 0.3508746 | 1.1982645 | 0.006993  | 0.0691211 | 0.0552386 |
| GO:004354  | positive regulation    | 368 | 0.3892726 | 1.3004302 | 0.007     | 0.0691211 | 0.0552386 |
| GO:004002  | regulation of          | 285 | 0.3968641 | 1.3170985 | 0.007014  | 0.0691828 | 0.0552879 |
| GO:000648  | protein glycosylation  | 238 | 0.4014547 | 1.322872  | 0.0070493 | 0.0693771 | 0.0554432 |
| GO:004341  | macromolecular         | 238 | 0.4014547 | 1.322872  | 0.0070493 | 0.0693771 | 0.0554432 |
| GO:003139  | regulation of          | 187 | 0.4215509 | 1.3723414 | 0.0070707 | 0.0694849 | 0.0555293 |
| GO:000756  | female pregnancy       | 181 | 0.4237239 | 1.3756778 | 0.0070779 | 0.0694849 | 0.0555293 |
| GO:190012  | regulation of          | 22  | 0.6231364 | 1.5654572 | 0.0070838 | 0.0694849 | 0.0555293 |
| GO:000228  | lymphocyte             | 170 | 0.4255901 | 1.3772023 | 0.0070994 | 0.0694849 | 0.0555293 |
| GO:003268  | regulation of          | 139 | 0.4448155 | 1.4254859 | 0.0070994 | 0.0694849 | 0.0555293 |
| GO:003264  | tumor necrosis         | 142 | 0.4404397 | 1.4108406 | 0.0071138 | 0.0695495 | 0.055581  |
| GO:005125  | negative regulation    | 133 | 0.4419035 | 1.4097631 | 0.0071721 | 0.0700426 | 0.055975  |
| GO:000820  | androgen response      | 27  | -0.642779 | -2.111581 | 0.0072464 | 0.0702274 | 0.0561227 |
| GO:003437  | plasma lipoprotein     | 27  | -0.669966 | -2.200893 | 0.0072464 | 0.0702274 | 0.0561227 |
| GO:004273  | fibrinolysis           | 27  | -0.721577 | -2.370441 | 0.0072464 | 0.0702274 | 0.0561227 |
| GO:004275  | long-chain             | 27  | -0.756328 | -2.484599 | 0.0072464 | 0.0702274 | 0.0561227 |
| GO:005082  | positive regulation    | 27  | -0.64385  | -2.115101 | 0.0072464 | 0.0702274 | 0.0561227 |
| GO:007128  | cellular morphogenesis | 27  | -0.579626 | -1.904121 | 0.0072464 | 0.0702274 | 0.0561227 |
| GO:007237  | blood coagulation      | 27  | -0.787264 | -2.586229 | 0.0072464 | 0.0702274 | 0.0561227 |

|           |                           |     |           |           |           |           |           |
|-----------|---------------------------|-----|-----------|-----------|-----------|-----------|-----------|
| G0:000628 | regulation of             | 106 | 0.4553887 | 1.4192163 | 0.0072993 | 0.070663  | 0.0564708 |
| G0:000669 | bile acid                 | 34  | -0.740857 | -2.533384 | 0.0073529 | 0.0708737 | 0.0566392 |
| G0:001943 | triglyceride              | 34  | -0.704868 | -2.41032  | 0.0073529 | 0.0708737 | 0.0566392 |
| G0:009720 | activation of             | 13  | 0.7103771 | 1.588898  | 0.0073529 | 0.0708737 | 0.0566392 |
| G0:190002 | negative regulation of    | 13  | 0.7090795 | 1.5859958 | 0.0073529 | 0.0708737 | 0.0566392 |
| G0:001077 | negative regulation of    | 94  | 0.4665156 | 1.438914  | 0.007384  | 0.0710903 | 0.0568123 |
| G0:003031 | osteoclast                | 92  | 0.4740269 | 1.4584188 | 0.0074074 | 0.0710903 | 0.0568123 |
| G0:004646 | neutral lipid             | 37  | -0.691563 | -2.415668 | 0.0074074 | 0.0710903 | 0.0568123 |
| G0:004646 | acylglycerol              | 37  | -0.691563 | -2.415668 | 0.0074074 | 0.0710903 | 0.0568123 |
| G0:000695 | complement                | 33  | -0.603337 | -2.046691 | 0.0074627 | 0.0713128 | 0.0569901 |
| G0:001090 | positive regulation of    | 36  | -0.551111 | -1.906662 | 0.0074627 | 0.0713128 | 0.0569901 |
| G0:003289 | positive regulation of    | 33  | -0.573467 | -1.945364 | 0.0074627 | 0.0713128 | 0.0569901 |
| G0:004257 | retinol metabolism        | 36  | -0.744785 | -2.576711 | 0.0074627 | 0.0713128 | 0.0569901 |
| G0:000158 | detection of              | 35  | -0.567376 | -1.95433  | 0.0075188 | 0.0713884 | 0.0570505 |
| G0:001943 | triglyceride              | 35  | -0.687661 | -2.368652 | 0.0075188 | 0.0713884 | 0.0570505 |
| G0:003376 | response to               | 35  | -0.623289 | -2.146921 | 0.0075188 | 0.0713884 | 0.0570505 |
| G0:005509 | acylglycerol              | 35  | -0.725764 | -2.499898 | 0.0075188 | 0.0713884 | 0.0570505 |
| G0:007032 | triglyceride              | 35  | -0.725764 | -2.499898 | 0.0075188 | 0.0713884 | 0.0570505 |
| G0:009020 | regulation of             | 35  | -0.626118 | -2.156667 | 0.0075188 | 0.0713884 | 0.0570505 |
| G0:003248 | positive regulation of    | 73  | 0.4949906 | 1.4929516 | 0.0075594 | 0.0715609 | 0.0571883 |
| G0:000821 | estrogen response element | 29  | -0.749976 | -2.464397 | 0.0075758 | 0.0715609 | 0.0571883 |
| G0:000907 | aromatic amino acid       | 39  | -0.757137 | -2.661315 | 0.0075758 | 0.0715609 | 0.0571883 |
| G0:003436 | protein-coupled           | 29  | -0.700725 | -2.302562 | 0.0075758 | 0.0715609 | 0.0571883 |
| G0:000606 | glucuronate               | 5   | -0.911679 | -1.855386 | 0.0076046 | 0.0715609 | 0.0571883 |
| G0:001964 | glucuronate               | 5   | -0.911679 | -1.855386 | 0.0076046 | 0.0715609 | 0.0571883 |
| G0:005116 | xylulose 5-phosphate      | 5   | -0.911679 | -1.855386 | 0.0076046 | 0.0715609 | 0.0571883 |
| G0:190115 | xylulose 5-phosphate      | 5   | -0.911679 | -1.855386 | 0.0076046 | 0.0715609 | 0.0571883 |
| G0:005085 | regulation of             | 61  | 0.5074353 | 1.4979138 | 0.0076253 | 0.0715609 | 0.0571883 |
| G0:000907 | aromatic amino acid       | 28  | -0.776827 | -2.526048 | 0.0076336 | 0.0715609 | 0.0571883 |
| G0:003436 | protein-ligand            | 28  | -0.711117 | -2.312374 | 0.0076336 | 0.0715609 | 0.0571883 |
| G0:003436 | plasma lipid              | 28  | -0.711117 | -2.312374 | 0.0076336 | 0.0715609 | 0.0571883 |
| G0:004483 | actomyosin                | 7   | 0.7917063 | 1.5283178 | 0.007722  | 0.0723135 | 0.0577898 |
| G0:000699 | nuclear envelope          | 52  | 0.5203027 | 1.4939089 | 0.0077864 | 0.0727614 | 0.0581477 |
| G0:000009 | sulfur amino acid         | 38  | -0.662238 | -2.295859 | 0.007874  | 0.0727614 | 0.0581477 |
| G0:000608 | acetyl-CoA                | 38  | -0.567419 | -1.96714  | 0.007874  | 0.0727614 | 0.0581477 |
| G0:000653 | glutamate                 | 31  | -0.700707 | -2.304429 | 0.007874  | 0.0727614 | 0.0581477 |
| G0:001983 | cytolysis                 | 40  | -0.562392 | -1.9592   | 0.007874  | 0.0727614 | 0.0581477 |
| G0:003334 | cholesterol               | 41  | -0.551599 | -1.936798 | 0.007874  | 0.0727614 | 0.0581477 |
| G0:005091 | detection of              | 40  | -0.538694 | -1.876643 | 0.007874  | 0.0727614 | 0.0581477 |
| G0:006500 | protein-ligand            | 31  | -0.641008 | -2.108098 | 0.007874  | 0.0727614 | 0.0581477 |
| G0:000003 | very long-chain           | 30  | -0.564062 | -1.825888 | 0.0079365 | 0.0727614 | 0.0581477 |
| G0:000597 | glycogen                  | 42  | -0.497627 | -1.762271 | 0.0079365 | 0.0727614 | 0.0581477 |
| G0:000677 | fat-soluble               | 42  | -0.505432 | -1.789912 | 0.0079365 | 0.0727614 | 0.0581477 |
| G0:000925 | glucan                    | 42  | -0.497627 | -1.762271 | 0.0079365 | 0.0727614 | 0.0581477 |
| G0:004632 | regulation of             | 30  | -0.650862 | -2.106862 | 0.0079365 | 0.0727614 | 0.0581477 |
| G0:004646 | neutral lipid             | 42  | -0.655826 | -2.322507 | 0.0079365 | 0.0727614 | 0.0581477 |
| G0:004646 | acylglycerol              | 42  | -0.655826 | -2.322507 | 0.0079365 | 0.0727614 | 0.0581477 |
| G0:000224 | connective tissue         | 6   | 0.8116601 | 1.5126096 | 0.0079681 | 0.0727614 | 0.0581477 |
| G0:001625 | attachment of             | 6   | 0.8175222 | 1.5235342 | 0.0079681 | 0.0727614 | 0.0581477 |
| G0:190000 | negative regulation of    | 6   | 0.8257486 | 1.538865  | 0.0079681 | 0.0727614 | 0.0581477 |
| G0:190257 | negative regulation of    | 6   | 0.8257486 | 1.538865  | 0.0079681 | 0.0727614 | 0.0581477 |

|                       |     |           |           |           |           |           |
|-----------------------|-----|-----------|-----------|-----------|-----------|-----------|
| G0:2001181positive r  | 6   | 0.8203431 | 1.5287912 | 0.0079681 | 0.0727614 | 0.0581477 |
| G0:0007161transmembr  | 676 | 0.3574702 | 1.2125864 | 0.007992  | 0.0727614 | 0.0581477 |
| G0:0007271gamete ger  | 615 | 0.3680867 | 1.2470608 | 0.007992  | 0.0727614 | 0.0581477 |
| G0:0031401negative r  | 552 | 0.3706946 | 1.2506461 | 0.008     | 0.0727614 | 0.0581477 |
| G0:0030111regulator   | 341 | 0.3897565 | 1.2994004 | 0.008008  | 0.0727614 | 0.0581477 |
| G0:0016231macroautoph | 281 | 0.3925418 | 1.3011877 | 0.0080241 | 0.0727614 | 0.0581477 |
| G0:0006551leucine c   | 6   | -0.880801 | -1.902928 | 0.0080321 | 0.0727614 | 0.0581477 |
| G0:0048251mRNA stabi  | 39  | 0.5519958 | 1.5284023 | 0.008046  | 0.0727614 | 0.0581477 |
| G0:0050851regulator   | 39  | 0.5475869 | 1.5161945 | 0.008046  | 0.0727614 | 0.0581477 |
| G0:0050731regulator   | 244 | 0.4023926 | 1.3272562 | 0.0080483 | 0.0727614 | 0.0581477 |
| G0:0032631interleuki  | 33  | 0.5634009 | 1.5263647 | 0.0080645 | 0.0727614 | 0.0581477 |
| G0:0043391regulator   | 206 | 0.4063168 | 1.3354277 | 0.0080645 | 0.0727614 | 0.0581477 |
| G0:0097061ncRNA exp   | 36  | 0.5511976 | 1.5067959 | 0.0080645 | 0.0727614 | 0.0581477 |
| G0:0016191endosomal   | 200 | 0.4099218 | 1.3441657 | 0.0080727 | 0.0727614 | 0.0581477 |
| G0:0034341response t  | 187 | 0.4174147 | 1.3588761 | 0.0080808 | 0.0727614 | 0.0581477 |
| G0:0035961response t  | 189 | 0.4176955 | 1.361098  | 0.0080808 | 0.0727614 | 0.0581477 |
| G0:0045611regulator   | 162 | 0.4272147 | 1.3788396 | 0.0080972 | 0.0727614 | 0.0581477 |
| G0:1902101positive r  | 139 | 0.4412647 | 1.4141068 | 0.0081136 | 0.0727614 | 0.0581477 |
| G0:0031911negative r  | 5   | 0.8559559 | 1.5448013 | 0.0081191 | 0.0727614 | 0.0581477 |
| G0:0045591negative r  | 5   | 0.8546503 | 1.542445  | 0.0081191 | 0.0727614 | 0.0581477 |
| G0:0038121ERBB sign   | 137 | 0.4442211 | 1.4231721 | 0.0081218 | 0.0727614 | 0.0581477 |
| G0:0008201bile acid   | 45  | -0.700384 | -2.555468 | 0.0081301 | 0.0727614 | 0.0581477 |
| G0:0032371regulator   | 45  | -0.529548 | -1.932144 | 0.0081301 | 0.0727614 | 0.0581477 |
| G0:0032371regulator   | 45  | -0.529548 | -1.932144 | 0.0081301 | 0.0727614 | 0.0581477 |
| G0:0042301regulator   | 45  | -0.493802 | -1.801721 | 0.0081301 | 0.0727614 | 0.0581477 |
| G0:0006991nucleus or  | 124 | 0.443901  | 1.4137628 | 0.00818   | 0.0731341 | 0.0584456 |
| G0:0018101peptidyl-t  | 118 | 0.4507922 | 1.4257191 | 0.008222  | 0.0733946 | 0.0586538 |
| G0:0033561regulator   | 24  | 0.6138245 | 1.5647937 | 0.0082256 | 0.0733946 | 0.0586538 |
| G0:0007061regulator   | 21  | 0.6366235 | 1.5782352 | 0.0083037 | 0.0737948 | 0.0589736 |
| G0:0042451purine nuc  | 21  | 0.628785  | 1.5588029 | 0.0083037 | 0.0737948 | 0.0589736 |
| G0:0046121purine rik  | 21  | 0.628785  | 1.5588029 | 0.0083037 | 0.0737948 | 0.0589736 |
| G0:0061431establishm  | 21  | 0.6324041 | 1.5677748 | 0.0083037 | 0.0737948 | 0.0589736 |
| G0:0009061serine fan  | 44  | -0.694678 | -2.505071 | 0.0083333 | 0.0739105 | 0.0590661 |
| G0:0071821plasma lip  | 44  | -0.616946 | -2.224761 | 0.0083333 | 0.0739105 | 0.0590661 |
| G0:0070491interleuki  | 98  | 0.4614304 | 1.4327297 | 0.0083595 | 0.0740683 | 0.0591922 |
| G0:0002451humoral in  | 46  | -0.488639 | -1.782527 | 0.0084746 | 0.0747158 | 0.0597097 |
| G0:0006951acute-phas  | 46  | -0.552649 | -2.016031 | 0.0084746 | 0.0747158 | 0.0597097 |
| G0:0045541regulator   | 43  | -0.509198 | -1.80619  | 0.0084746 | 0.0747158 | 0.0597097 |
| G0:0106111regulator   | 43  | -0.509198 | -1.80619  | 0.0084746 | 0.0747158 | 0.0597097 |
| G0:1903071regulator   | 91  | 0.4706698 | 1.4452884 | 0.0084746 | 0.0747158 | 0.0597097 |
| G0:0070091chemokine-  | 86  | 0.4734686 | 1.4465385 | 0.0085288 | 0.0751192 | 0.060032  |
| G0:0071801podosome    | 18  | 0.6570587 | 1.5676632 | 0.008547  | 0.0751839 | 0.0600838 |
| G0:0032761positive r  | 81  | 0.4743327 | 1.4416869 | 0.0085653 | 0.0751839 | 0.0600838 |
| G0:0060211hematopoie  | 81  | 0.4774379 | 1.4511248 | 0.0085653 | 0.0751839 | 0.0600838 |
| G0:0002281macrophage  | 13  | 0.7043666 | 1.5754545 | 0.0085784 | 0.0751839 | 0.0600838 |
| G0:1901071guanosine-  | 13  | 0.7044692 | 1.5756839 | 0.0085784 | 0.0751839 | 0.0600838 |
| G0:0033141positive r  | 15  | 0.6780836 | 1.5581568 | 0.0086101 | 0.075387  | 0.060246  |
| G0:1900181positive r  | 74  | 0.4924352 | 1.4863034 | 0.0086393 | 0.0755684 | 0.060391  |
| G0:0070661negative r  | 72  | 0.4921408 | 1.4813041 | 0.0086674 | 0.0757237 | 0.0605151 |
| G0:0070481leukocyte   | 12  | 0.74061   | 1.6256443 | 0.0086741 | 0.0757237 | 0.0605151 |
| G0:0007041lysosome c  | 60  | 0.5053073 | 1.4918729 | 0.0087432 | 0.076177  | 0.0608774 |



|                      |     |           |           |           |           |           |
|----------------------|-----|-----------|-----------|-----------|-----------|-----------|
| G0:0080171lytic vacu | 60  | 0.5053073 | 1.4918729 | 0.0087432 | 0.076177  | 0.0608774 |
| G0:0098885synapse pr | 11  | 0.7535473 | 1.6176315 | 0.0087829 | 0.0764485 | 0.0610944 |
| G0:0001934positive r | 937 | 0.3506148 | 1.1962151 | 0.008991  | 0.0781066 | 0.0624194 |
| G0:0045866positive r | 502 | 0.3712415 | 1.2507084 | 0.008991  | 0.0781066 | 0.0624194 |
| G0:0032808lacrima    | 7   | 0.7889397 | 1.5229771 | 0.009009  | 0.0781866 | 0.0624833 |
| G0:0070646protein mc | 262 | 0.4012033 | 1.3272293 | 0.009018  | 0.0781886 | 0.0624849 |
| G0:0010821regulator  | 177 | 0.4206858 | 1.3648725 | 0.0090909 | 0.0786669 | 0.0628672 |
| G0:1902115regulator  | 182 | 0.4182437 | 1.3581328 | 0.0090909 | 0.0786669 | 0.0628672 |
| G0:0040026regulator  | 27  | 0.5931946 | 1.5535751 | 0.0092593 | 0.079968  | 0.0639069 |
| G0:0060142regulator  | 27  | 0.5934647 | 1.5542826 | 0.0092593 | 0.079968  | 0.0639069 |
| G0:2000736regulator  | 112 | 0.4567425 | 1.4362446 | 0.0092879 | 0.0801377 | 0.0640425 |
| G0:0006584catecholam | 49  | -0.418781 | -1.558198 | 0.0093458 | 0.0802474 | 0.0641303 |
| G0:0009712catechol-c | 49  | -0.418781 | -1.558198 | 0.0093458 | 0.0802474 | 0.0641303 |
| G0:0019366arachidoni | 47  | -0.612632 | -2.233832 | 0.0093458 | 0.0802474 | 0.0641303 |
| G0:0071326cellular r | 49  | -0.503318 | -1.872742 | 0.0093458 | 0.0802474 | 0.0641303 |
| G0:1903795positive r | 49  | -0.509931 | -1.897348 | 0.0093458 | 0.0802474 | 0.0641303 |
| G0:0046697decidualiz | 24  | 0.6045575 | 1.5411698 | 0.0094007 | 0.0805632 | 0.0643826 |
| G0:0060561apoptotic  | 24  | 0.6108759 | 1.557277  | 0.0094007 | 0.0805632 | 0.0643826 |
| G0:0030445regulator  | 50  | -0.665254 | -2.485023 | 0.009434  | 0.0807703 | 0.0645482 |
| G0:0042321negative r | 5   | 0.8522156 | 1.538051  | 0.0094723 | 0.0810202 | 0.0647478 |
| G0:0031575membrane r | 21  | 0.6264157 | 1.5529294 | 0.0094899 | 0.0810932 | 0.0648061 |
| G0:0071825protein-li | 48  | -0.597864 | -2.195285 | 0.0095238 | 0.0813046 | 0.0649751 |
| G0:0009066aspartate  | 51  | -0.608521 | -2.272525 | 0.0096154 | 0.0818505 | 0.0654114 |
| G0:0010045response t | 51  | -0.523068 | -1.9534   | 0.0096154 | 0.0818505 | 0.0654114 |
| G0:2000257regulator  | 51  | -0.681292 | -2.544289 | 0.0096154 | 0.0818505 | 0.0654114 |
| G0:0006576cellular k | 53  | -0.48523  | -1.849471 | 0.0097087 | 0.0820947 | 0.0656065 |
| G0:0030195negative r | 52  | -0.596912 | -2.24217  | 0.0097087 | 0.0820947 | 0.0656065 |
| G0:0034381plasma lip | 52  | -0.458354 | -1.721708 | 0.0097087 | 0.0820947 | 0.0656065 |
| G0:0042364water-solu | 8   | -0.781072 | -1.793089 | 0.0097087 | 0.0820947 | 0.0656065 |
| G0:0046164alcohol ca | 52  | -0.504803 | -1.89618  | 0.0097087 | 0.0820947 | 0.0656065 |
| G0:0090305positive r | 53  | -0.465466 | -1.77414  | 0.0097087 | 0.0820947 | 0.0656065 |
| G0:1900047negative r | 53  | -0.582831 | -2.221479 | 0.0097087 | 0.0820947 | 0.0656065 |
| G0:0006558L-phenylal | 11  | -0.723567 | -1.846274 | 0.0097561 | 0.0821182 | 0.0656253 |
| G0:0006559L-phenylal | 11  | -0.723567 | -1.846274 | 0.0097561 | 0.0821182 | 0.0656253 |
| G0:1902221erythro    | 11  | -0.723567 | -1.846274 | 0.0097561 | 0.0821182 | 0.0656253 |
| G0:1902222erythro    | 11  | -0.723567 | -1.846274 | 0.0097561 | 0.0821182 | 0.0656253 |
| G0:0002902regulator  | 18  | 0.6522732 | 1.5562454 | 0.009768  | 0.0821182 | 0.0656253 |
| G0:0031115negative r | 13  | 0.6915897 | 1.5468764 | 0.0098039 | 0.0821182 | 0.0656253 |
| G0:0051382kinetochor | 14  | 0.6902474 | 1.570565  | 0.0098039 | 0.0821182 | 0.0656253 |
| G0:0070665response t | 14  | 0.6884043 | 1.5663714 | 0.0098039 | 0.0821182 | 0.0656253 |
| G0:0070672response t | 14  | 0.6910936 | 1.5724906 | 0.0098039 | 0.0821182 | 0.0656253 |
| G0:2000052positive r | 13  | 0.7030824 | 1.572582  | 0.0098039 | 0.0821182 | 0.0656253 |
| G0:1903745positive r | 58  | 0.5027737 | 1.4748217 | 0.0098253 | 0.08222   | 0.0657067 |
| G0:0072608interleuki | 10  | 0.775256  | 1.6299155 | 0.0098888 | 0.0823356 | 0.0657991 |
| G0:0034371chylomicro | 9   | -0.766366 | -1.822206 | 0.009901  | 0.0823356 | 0.0657991 |
| G0:0046951ketone bod | 9   | -0.823079 | -1.957055 | 0.009901  | 0.0823356 | 0.0657991 |
| G0:0050815negative r | 54  | -0.588869 | -2.255683 | 0.009901  | 0.0823356 | 0.0657991 |
| G0:0050994regulator  | 54  | -0.576181 | -2.207083 | 0.009901  | 0.0823356 | 0.0657991 |
| G0:0000212meiotic sp | 12  | 0.728849  | 1.5998288 | 0.0099133 | 0.0823356 | 0.0657991 |
| G0:0038116interleuki | 12  | 0.7255753 | 1.5926429 | 0.0099133 | 0.0823356 | 0.0657991 |
| G0:0070202regulator  | 12  | 0.7339057 | 1.6109282 | 0.0099133 | 0.0823356 | 0.0657991 |

|                      |     |           |           |           |           |           |
|----------------------|-----|-----------|-----------|-----------|-----------|-----------|
| G0:001072(positive r | 515 | 0.3698017 | 1.2469265 | 0.00999   | 0.0823786 | 0.0658334 |
| G0:003299(cell part  | 661 | 0.3641564 | 1.2353081 | 0.00999   | 0.0823786 | 0.0658334 |
| G0:004566(regulator  | 617 | 0.3661773 | 1.2403156 | 0.00999   | 0.0823786 | 0.0658334 |
| G0:004885(cell proje | 643 | 0.3651263 | 1.2372075 | 0.00999   | 0.0823786 | 0.0658334 |
| G0:005077(positive r | 736 | 0.3593582 | 1.2203295 | 0.00999   | 0.0823786 | 0.0658334 |
| G0:000641(regulator  | 326 | 0.3826224 | 1.274873  | 0.01      | 0.0823786 | 0.0658334 |
| G0:005254(regulator  | 405 | 0.3798973 | 1.2736208 | 0.01      | 0.0823786 | 0.0658334 |
| G0:009854(defense re | 432 | 0.3751541 | 1.2601123 | 0.01      | 0.0823786 | 0.0658334 |
| G0:000155(regulator  | 390 | 0.3759806 | 1.2581055 | 0.01001   | 0.0823786 | 0.0658334 |
| G0:007022(regulator  | 53  | 0.5121713 | 1.4757827 | 0.0100111 | 0.0823786 | 0.0658334 |
| G0:001657(protein de | 247 | 0.3986852 | 1.3161593 | 0.0100503 | 0.0824783 | 0.0659131 |
| G0:007008(glycosylat | 247 | 0.3952486 | 1.3048141 | 0.0100503 | 0.0824783 | 0.0659131 |
| G0:200024(negative r | 49  | 0.5175678 | 1.4760603 | 0.0100559 | 0.0824783 | 0.0659131 |
| G0:004677(protein au | 229 | 0.3973936 | 1.3092364 | 0.0100604 | 0.0824783 | 0.0659131 |
| G0:004274(defense re | 214 | 0.4039088 | 1.3277295 | 0.0100806 | 0.0825684 | 0.0659851 |
| G0:003289(regulator  | 55  | -0.436111 | -1.675319 | 0.010101  | 0.082659  | 0.0660575 |
| G0:000269(negative r | 161 | 0.4264943 | 1.3764706 | 0.0101215 | 0.0827501 | 0.0661303 |
| G0:007190(negative r | 126 | 0.4386721 | 1.397971  | 0.0102041 | 0.083349  | 0.0666089 |
| G0:000656(tryptophar | 12  | -0.716568 | -1.895532 | 0.0102564 | 0.0833932 | 0.0666442 |
| G0:000658(indolalkyl | 17  | -0.692788 | -2.061799 | 0.0102564 | 0.0833932 | 0.0666442 |
| G0:000670(cholesterc | 12  | -0.712933 | -1.885917 | 0.0102564 | 0.0833932 | 0.0666442 |
| G0:001086(regulator  | 17  | -0.664595 | -1.977892 | 0.0102564 | 0.0833932 | 0.0666442 |
| G0:001612(sterol cat | 12  | -0.712933 | -1.885917 | 0.0102564 | 0.0833932 | 0.0666442 |
| G0:004202(protein re | 31  | 0.5741964 | 1.5453375 | 0.0102857 | 0.0834934 | 0.0667243 |
| G0:190200(fatty acid | 16  | -0.686021 | -2.000102 | 0.0103093 | 0.0834934 | 0.0667243 |
| G0:004828(organelle  | 115 | 0.4492685 | 1.4164494 | 0.0103306 | 0.0834934 | 0.0667243 |
| G0:190274(positive r | 28  | 0.587012  | 1.549693  | 0.010333  | 0.0834934 | 0.0667243 |
| G0:007258(clathrin-c | 39  | 0.542236  | 1.5013787 | 0.0103448 | 0.0834934 | 0.0667243 |
| G0:003537(sterol imp | 10  | -0.79983  | -1.949345 | 0.0103627 | 0.0834934 | 0.0667243 |
| G0:004275(long-chair | 10  | -0.822648 | -2.004955 | 0.0103627 | 0.0834934 | 0.0667243 |
| G0:004668(response t | 10  | -0.788176 | -1.92094  | 0.0103627 | 0.0834934 | 0.0667243 |
| G0:005191(negative r | 10  | -0.8252   | -2.011176 | 0.0103627 | 0.0834934 | 0.0667243 |
| G0:007050(cholesterc | 10  | -0.79983  | -1.949345 | 0.0103627 | 0.0834934 | 0.0667243 |
| G0:000863(intrinsic  | 101 | 0.4557546 | 1.4187344 | 0.0104058 | 0.0836892 | 0.0668808 |
| G0:003296(collagen n | 101 | 0.4548709 | 1.4159837 | 0.0104058 | 0.0836892 | 0.0668808 |
| G0:000907(serine fan | 15  | -0.716984 | -2.024998 | 0.010582  | 0.0847992 | 0.0677679 |
| G0:004571(negative r | 15  | -0.707733 | -1.998869 | 0.010582  | 0.0847992 | 0.0677679 |
| G0:004572(positive r | 15  | -0.716432 | -2.023438 | 0.010582  | 0.0847992 | 0.0677679 |
| G0:009750(stress res | 15  | -0.696351 | -1.966724 | 0.010582  | 0.0847992 | 0.0677679 |
| G0:007030(cellular r | 88  | 0.4721577 | 1.4449734 | 0.0106045 | 0.0849025 | 0.0678504 |
| G0:001926(N-acetylne | 6   | 0.799368  | 1.4897021 | 0.0106242 | 0.0849299 | 0.0678723 |
| G0:000182(blastocyst | 90  | 0.4677261 | 1.4345082 | 0.010627  | 0.0849299 | 0.0678723 |
| G0:007126(cellular r | 77  | 0.4870984 | 1.4765397 | 0.0107181 | 0.0852445 | 0.0681237 |
| G0:000695(complement | 14  | -0.741875 | -2.02043  | 0.0107527 | 0.0852445 | 0.0681237 |
| G0:001067(positive r | 56  | -0.448509 | -1.731407 | 0.0107527 | 0.0852445 | 0.0681237 |
| G0:001700(antibiotic | 56  | -0.414761 | -1.601129 | 0.0107527 | 0.0852445 | 0.0681237 |
| G0:003438(high-densi | 14  | -0.704706 | -1.919204 | 0.0107527 | 0.0852445 | 0.0681237 |
| G0:004424(lipid dige | 19  | -0.644208 | -1.972573 | 0.0107527 | 0.0852445 | 0.0681237 |
| G0:007138(cellular r | 56  | -0.410975 | -1.586514 | 0.0107527 | 0.0852445 | 0.0681237 |
| G0:009018(regulator  | 56  | -0.53915  | -2.081318 | 0.0107527 | 0.0852445 | 0.0681237 |
| G0:009020(positive r | 19  | -0.609981 | -1.867771 | 0.0107527 | 0.0852445 | 0.0681237 |

|                      |     |           |           |           |           |           |
|----------------------|-----|-----------|-----------|-----------|-----------|-----------|
| G0:0050871positive r | 70  | 0.4899442 | 1.4717135 | 0.010846  | 0.0858311 | 0.0685925 |
| G0:1902036regulator  | 70  | 0.4853326 | 1.4578611 | 0.010846  | 0.0858311 | 0.0685925 |
| G0:2000775regulator  | 66  | 0.4922382 | 1.4664535 | 0.0108578 | 0.0858478 | 0.0686059 |
| G0:0031998regulator  | 18  | -0.652399 | -1.937804 | 0.010929  | 0.0863339 | 0.0689943 |
| G0:0098657import int | 801 | 0.3546558 | 1.2050905 | 0.010989  | 0.086436  | 0.0690759 |
| G0:0022604regulator  | 463 | 0.3737692 | 1.2553952 | 0.011     | 0.086436  | 0.0690759 |
| G0:0033674positive r | 542 | 0.3669741 | 1.237844  | 0.011     | 0.086436  | 0.0690759 |
| G0:0046516ceramide k | 56  | 0.5064619 | 1.4746388 | 0.0110011 | 0.086436  | 0.0690759 |
| G0:0008544epidermis  | 389 | 0.3774394 | 1.2625268 | 0.011011  | 0.086436  | 0.0690759 |
| G0:0002525leukocyte  | 14  | 0.6705683 | 1.525788  | 0.0110294 | 0.086436  | 0.0690759 |
| G0:0006596polyamine  | 13  | 0.6902622 | 1.5439071 | 0.0110294 | 0.086436  | 0.0690759 |
| G0:0010756positive r | 14  | 0.6737285 | 1.5329786 | 0.0110294 | 0.086436  | 0.0690759 |
| G0:0030852regulator  | 14  | 0.669158  | 1.522579  | 0.0110294 | 0.086436  | 0.0690759 |
| G0:0099024plasma men | 55  | 0.5100786 | 1.4805111 | 0.0110742 | 0.0867105 | 0.0692953 |
| G0:0070675response t | 10  | 0.7641875 | 1.6066449 | 0.0111248 | 0.0870304 | 0.0695509 |
| G0:0051988regulator  | 12  | 0.7218238 | 1.5844084 | 0.0111524 | 0.0871222 | 0.0696243 |
| G0:0008366regulator  | 143 | 0.4328627 | 1.3881836 | 0.0111562 | 0.0871222 | 0.0696243 |
| G0:0010976transport  | 156 | 0.4266837 | 1.3742647 | 0.0111789 | 0.0871461 | 0.0696434 |
| G0:0099111microtubul | 156 | 0.4266837 | 1.3742647 | 0.0111789 | 0.0871461 | 0.0696434 |
| G0:0034614cellular r | 153 | 0.4282592 | 1.3759782 | 0.0111902 | 0.0871583 | 0.0696531 |
| G0:0018216peptidyl-t | 125 | 0.4386852 | 1.3973962 | 0.011236  | 0.0873613 | 0.0698153 |
| G0:0032675regulator  | 130 | 0.4385655 | 1.3976519 | 0.011236  | 0.0873613 | 0.0698153 |
| G0:0071635negative r | 9   | 0.7722544 | 1.5823841 | 0.01125   | 0.087394  | 0.0698415 |
| G0:0070601centromeri | 11  | 0.7469924 | 1.6035601 | 0.0112923 | 0.0874722 | 0.069904  |
| G0:0006071glycerol n | 20  | -0.638499 | -1.981631 | 0.0112994 | 0.0874722 | 0.069904  |
| G0:1901688glutathior | 20  | -0.603014 | -1.871502 | 0.0112994 | 0.0874722 | 0.069904  |
| G0:1901687glutathior | 20  | -0.603014 | -1.871502 | 0.0112994 | 0.0874722 | 0.069904  |
| G0:0051972regulator  | 46  | 0.529036  | 1.4935256 | 0.0113122 | 0.0874949 | 0.0699222 |
| G0:0014015regulator  | 113 | 0.4546522 | 1.4308935 | 0.0113402 | 0.0876351 | 0.0700342 |
| G0:0006567threonine  | 5   | -0.888411 | -1.808033 | 0.0114068 | 0.0879207 | 0.0702625 |
| G0:0015747urate trar | 5   | -0.90353  | -1.838803 | 0.0114068 | 0.0879207 | 0.0702625 |
| G0:0019518L-threonir | 5   | -0.888411 | -1.808033 | 0.0114068 | 0.0879207 | 0.0702625 |
| G0:0090224regulator  | 40  | 0.5339271 | 1.4829469 | 0.0114286 | 0.0880119 | 0.0703353 |
| G0:0006409tRNA expor | 32  | 0.5587784 | 1.5114052 | 0.0114548 | 0.0880123 | 0.0703356 |
| G0:0071431tRNA-conta | 32  | 0.5587784 | 1.5114052 | 0.0114548 | 0.0880123 | 0.0703356 |
| G0:0006415translatic | 102 | 0.4558332 | 1.4191029 | 0.0114583 | 0.0880123 | 0.0703356 |
| G0:0032506cytokineti | 39  | 0.5399067 | 1.494929  | 0.0114943 | 0.0880598 | 0.0703736 |
| G0:0036005positive r | 29  | 0.5825126 | 1.5466987 | 0.0114943 | 0.0880598 | 0.0703736 |
| G0:0090206positive r | 29  | 0.582427  | 1.5464712 | 0.0114943 | 0.0880598 | 0.0703736 |
| G0:0005977glycogen n | 65  | -0.540189 | -2.12561  | 0.0116279 | 0.0887777 | 0.0709473 |
| G0:0015908long-chair | 65  | -0.438972 | -1.727325 | 0.0116279 | 0.0887777 | 0.0709473 |
| G0:1901607alpha-amir | 62  | -0.569689 | -2.200425 | 0.0116279 | 0.0887777 | 0.0709473 |
| G0:1903036positive r | 62  | -0.410301 | -1.584789 | 0.0116279 | 0.0887777 | 0.0709473 |
| G0:0045621positive r | 90  | 0.4597832 | 1.4101474 | 0.0116897 | 0.0891728 | 0.071263  |
| G0:0060706cell diffe | 26  | 0.5827125 | 1.5081089 | 0.0117509 | 0.0895627 | 0.0715746 |
| G0:0000018regulator  | 79  | 0.4725066 | 1.4358237 | 0.0117899 | 0.0897547 | 0.0717281 |
| G0:0032755positive r | 23  | 0.6115645 | 1.544367  | 0.0118064 | 0.0897547 | 0.0717281 |
| G0:1904376negative r | 23  | 0.6052495 | 1.5284199 | 0.0118064 | 0.0897547 | 0.0717281 |
| G0:0019748secondary  | 59  | -0.497205 | -1.903231 | 0.0119048 | 0.090194  | 0.0720792 |
| G0:0046503glycerolip | 61  | -0.563221 | -2.191271 | 0.0119048 | 0.090194  | 0.0720792 |
| G0:0070988demethylat | 63  | -0.476561 | -1.831773 | 0.0119048 | 0.090194  | 0.0720792 |

|                      |     |           |           |           |           |           |
|----------------------|-----|-----------|-----------|-----------|-----------|-----------|
| G0:0071384cellular r | 59  | -0.406781 | -1.5571   | 0.0119048 | 0.090194  | 0.0720792 |
| G0:0150076neuroinfla | 61  | 0.4942111 | 1.4588768 | 0.0119826 | 0.0905931 | 0.0723981 |
| G0:0006897endocytosi | 681 | 0.3558872 | 1.2074562 | 0.011988  | 0.0905931 | 0.0723981 |
| G0:0048235male gamet | 490 | 0.3684708 | 1.2403754 | 0.011988  | 0.0905931 | 0.0723981 |
| G0:0034248regulator  | 382 | 0.3748122 | 1.2532998 | 0.012012  | 0.0906973 | 0.0724814 |
| G0:0034976response t | 267 | 0.395601  | 1.3069727 | 0.0120603 | 0.0909846 | 0.072711  |
| G0:0001818negative r | 256 | 0.3944655 | 1.3026139 | 0.0120724 | 0.0909989 | 0.0727224 |
| G0:0031294lymphocyte | 56  | 0.5043231 | 1.4684114 | 0.0121012 | 0.0911385 | 0.072834  |
| G0:0015698inorganic  | 162 | 0.423341  | 1.3663373 | 0.0121457 | 0.0913965 | 0.0730401 |
| G0:0032635interleuki | 139 | 0.4327907 | 1.3869505 | 0.0121704 | 0.0915044 | 0.0731264 |
| G0:0043954cellular c | 53  | 0.5066944 | 1.4600014 | 0.0122358 | 0.0918131 | 0.0733731 |
| G0:0030188B cell dif | 126 | 0.4368199 | 1.3920684 | 0.0122449 | 0.0918131 | 0.0733731 |
| G0:0038065collagen-a | 13  | 0.6794852 | 1.5198024 | 0.0122549 | 0.0918131 | 0.0733731 |
| G0:0051315attachment | 13  | 0.6821473 | 1.5257566 | 0.0122549 | 0.0918131 | 0.0733731 |
| G0:0032608interferon | 48  | 0.5142929 | 1.4640804 | 0.0122631 | 0.0918131 | 0.0733731 |
| G0:0006301postreplic | 50  | 0.5135502 | 1.4656783 | 0.0122768 | 0.0918382 | 0.0733931 |
| G0:0051238sequesteri | 15  | 0.6645503 | 1.5270587 | 0.0123001 | 0.0918581 | 0.073409  |
| G0:1902166negative r | 15  | 0.663565  | 1.5247946 | 0.0123001 | 0.0918581 | 0.073409  |
| G0:0045727positive r | 118 | 0.4436971 | 1.4032794 | 0.012333  | 0.0919665 | 0.0734957 |
| G0:0006076cellular g | 66  | -0.535682 | -2.098997 | 0.0123457 | 0.0919665 | 0.0734957 |
| G0:0044042glucan met | 66  | -0.535682 | -2.098997 | 0.0123457 | 0.0919665 | 0.0734957 |
| G0:0071805positive r | 10  | 0.7563697 | 1.5902086 | 0.0123609 | 0.0919999 | 0.0735224 |
| G0:0097340inhibitor  | 12  | 0.7170012 | 1.5738227 | 0.0123916 | 0.0919999 | 0.0735224 |
| G0:0097341zymogen ir | 12  | 0.7170012 | 1.5738227 | 0.0123916 | 0.0919999 | 0.0735224 |
| G0:2000641regulator  | 17  | 0.6560613 | 1.5399928 | 0.0123916 | 0.0919999 | 0.0735224 |
| G0:0061387regulator  | 107 | 0.4449807 | 1.3882731 | 0.012474  | 0.0925347 | 0.0739497 |
| G0:0015914phospholip | 70  | -0.413925 | -1.633765 | 0.0125    | 0.0926011 | 0.0740028 |
| G0:0035088establishm | 45  | 0.5206822 | 1.4628823 | 0.0125142 | 0.0926011 | 0.0740028 |
| G0:0061245establishm | 45  | 0.5206822 | 1.4628823 | 0.0125142 | 0.0926011 | 0.0740028 |
| G0:0019371cyclooxyge | 11  | 0.7435201 | 1.5961062 | 0.0125471 | 0.0927668 | 0.0741352 |
| G0:0050868negative r | 99  | 0.4541958 | 1.4099444 | 0.0125654 | 0.0927686 | 0.0741366 |
| G0:0042402cellular b | 21  | -0.70272  | -2.163331 | 0.0125786 | 0.0927686 | 0.0741366 |
| G0:0051004regulator  | 21  | -0.710259 | -2.186539 | 0.0125786 | 0.0927686 | 0.0741366 |
| G0:0051204protein ir | 32  | 0.5524584 | 1.4943106 | 0.0126002 | 0.0928509 | 0.0742024 |
| G0:0001895maternal p | 35  | 0.5469254 | 1.4903567 | 0.0126582 | 0.09297   | 0.0742976 |
| G0:0006081cellular a | 71  | -0.485284 | -1.92896  | 0.0126582 | 0.09297   | 0.0742976 |
| G0:0006635fatty acid | 71  | -0.721668 | -2.868566 | 0.0126582 | 0.09297   | 0.0742976 |
| G0:1901616organic hy | 71  | -0.577158 | -2.294153 | 0.0126582 | 0.09297   | 0.0742976 |
| G0:0060236regulator  | 36  | 0.538507  | 1.4721039 | 0.0126728 | 0.0930002 | 0.0743217 |
| G0:0032755positive r | 88  | 0.4621384 | 1.4143109 | 0.0127253 | 0.0933087 | 0.0745683 |
| G0:0030854positive r | 7   | 0.7853479 | 1.5160434 | 0.01287   | 0.0941469 | 0.0752382 |
| G0:0015740C4-dicarbo | 22  | -0.600955 | -1.898955 | 0.0129032 | 0.0941469 | 0.0752382 |
| G0:0019400alditol me | 23  | -0.613184 | -1.970925 | 0.0129032 | 0.0941469 | 0.0752382 |
| G0:0030535male genit | 23  | -0.615068 | -1.976982 | 0.0129032 | 0.0941469 | 0.0752382 |
| G0:0031635plasminoge | 23  | -0.575166 | -1.848727 | 0.0129032 | 0.0941469 | 0.0752382 |
| G0:0050995negative r | 23  | -0.604144 | -1.941869 | 0.0129032 | 0.0941469 | 0.0752382 |
| G0:0006285transcript | 68  | 0.4840892 | 1.4516412 | 0.0129171 | 0.094171  | 0.0752574 |
| G0:0007167enzyme lir | 974 | 0.3446632 | 1.1766685 | 0.012987  | 0.0943709 | 0.0754171 |
| G0:0071677positive r | 23  | 0.6036668 | 1.524423  | 0.012987  | 0.0943709 | 0.0754171 |
| G0:0120035plasma men | 639 | 0.3611    | 1.2234174 | 0.012987  | 0.0943709 | 0.0754171 |
| G0:1904388cellular r | 23  | 0.59937   | 1.5135724 | 0.012987  | 0.0943709 | 0.0754171 |

|           |     |           |           |           |           |           |
|-----------|-----|-----------|-----------|-----------|-----------|-----------|
| G0:000728 | 473 | 0.3709189 | 1.2466082 | 0.013     | 0.0943881 | 0.0754309 |
| G0:005254 | 380 | 0.3739398 | 1.2502512 | 0.013013  | 0.0944054 | 0.0754447 |
| G0:007019 | 59  | 0.4970582 | 1.4633551 | 0.0130719 | 0.0947552 | 0.0757243 |
| G0:000662 | 67  | -0.678297 | -2.623807 | 0.0131579 | 0.0948563 | 0.0758051 |
| G0:000906 | 67  | -0.530004 | -2.050175 | 0.0131579 | 0.0948563 | 0.0758051 |
| G0:001612 | 73  | -0.494399 | -1.973874 | 0.0131579 | 0.0948563 | 0.0758051 |
| G0:006104 | 73  | -0.523079 | -2.088381 | 0.0131579 | 0.0948563 | 0.0758051 |
| G0:007266 | 67  | -0.678297 | -2.623807 | 0.0131579 | 0.0948563 | 0.0758051 |
| G0:007266 | 67  | -0.678297 | -2.623807 | 0.0131579 | 0.0948563 | 0.0758051 |
| G0:003134 | 171 | 0.4165531 | 1.3487995 | 0.0131712 | 0.0948563 | 0.0758051 |
| G0:007134 | 169 | 0.4170726 | 1.3486822 | 0.0131712 | 0.0948563 | 0.0758051 |
| G0:190330 | 156 | 0.4253219 | 1.3698785 | 0.0132114 | 0.0950029 | 0.0759222 |
| G0:000670 | 26  | -0.59273  | -1.959915 | 0.013245  | 0.0950029 | 0.0759222 |
| G0:000673 | 26  | -0.577868 | -1.910772 | 0.013245  | 0.0950029 | 0.0759222 |
| G0:000906 | 26  | -0.565153 | -1.868729 | 0.013245  | 0.0950029 | 0.0759222 |
| G0:005099 | 24  | -0.597377 | -1.947688 | 0.013245  | 0.0950029 | 0.0759222 |
| G0:200130 | 6   | 0.7979642 | 1.4870859 | 0.0132802 | 0.0951017 | 0.0760012 |
| G0:200130 | 6   | 0.7979642 | 1.4870859 | 0.0132802 | 0.0951017 | 0.0760012 |
| G0:003410 | 113 | 0.4464852 | 1.4051901 | 0.0134021 | 0.095897  | 0.0766368 |
| G0:000690 | 43  | 0.5273497 | 1.4764937 | 0.0135747 | 0.0969265 | 0.0774595 |
| G0:003207 | 10  | 0.7539854 | 1.5851959 | 0.013597  | 0.0969265 | 0.0774595 |
| G0:005129 | 99  | 0.4479648 | 1.3906016 | 0.0136126 | 0.0969265 | 0.0774595 |
| G0:000707 | 12  | 0.7097758 | 1.5579628 | 0.0136307 | 0.0969265 | 0.0774595 |
| G0:190435 | 17  | 0.6390935 | 1.5001637 | 0.0136307 | 0.0969265 | 0.0774595 |
| G0:000178 | 30  | 0.5744275 | 1.5367277 | 0.0136986 | 0.0969265 | 0.0774595 |
| G0:000184 | 30  | 0.5745295 | 1.5370005 | 0.0136986 | 0.0969265 | 0.0774595 |
| G0:000292 | 68  | -0.570933 | -2.220563 | 0.0136986 | 0.0969265 | 0.0774595 |
| G0:000609 | 84  | -0.485537 | -2.016202 | 0.0136986 | 0.0969265 | 0.0774595 |
| G0:000669 | 68  | -0.490902 | -1.909295 | 0.0136986 | 0.0969265 | 0.0774595 |
| G0:000695 | 68  | -0.633871 | -2.465353 | 0.0136986 | 0.0969265 | 0.0774595 |
| G0:004244 | 84  | -0.375857 | -1.560753 | 0.0136986 | 0.0969265 | 0.0774595 |
| G0:004357 | 68  | -0.657858 | -2.558646 | 0.0136986 | 0.0969265 | 0.0774595 |
| G0:190265 | 68  | -0.490902 | -1.909295 | 0.0136986 | 0.0969265 | 0.0774595 |
| G0:003273 | 34  | 0.5438592 | 1.4763876 | 0.0138568 | 0.0979678 | 0.0782916 |
| G0:005178 | 83  | 0.4628878 | 1.4081362 | 0.0139037 | 0.0981434 | 0.078432  |
| G0:190153 | 83  | 0.463446  | 1.4098341 | 0.0139037 | 0.0981434 | 0.078432  |
| G0:000090 | 719 | 0.3508502 | 1.1910593 | 0.013986  | 0.0986273 | 0.0788186 |
| G0:001820 | 366 | 0.3792587 | 1.2660162 | 0.014014  | 0.0986273 | 0.0788186 |
| G0:000749 | 74  | 0.4722284 | 1.4253136 | 0.0140389 | 0.0986273 | 0.0788186 |
| G0:003294 | 67  | 0.4821104 | 1.4436688 | 0.0140389 | 0.0986273 | 0.0788186 |
| G0:005067 | 67  | 0.4821104 | 1.4436688 | 0.0140389 | 0.0986273 | 0.0788186 |
| G0:190331 | 73  | 0.4723463 | 1.4246537 | 0.0140389 | 0.0986273 | 0.0788186 |
| G0:005066 | 217 | 0.3969843 | 1.3064564 | 0.0140987 | 0.0988911 | 0.0790295 |
| G0:005160 | 217 | 0.3964709 | 1.3047668 | 0.0140987 | 0.0988911 | 0.0790295 |
| G0:000683 | 222 | 0.3982135 | 1.3098878 | 0.0141129 | 0.0989128 | 0.0790468 |
| G0:000224 | 161 | 0.4198582 | 1.3550534 | 0.01417   | 0.0992032 | 0.0792789 |
| G0:001580 | 64  | 0.4864674 | 1.441181  | 0.0141767 | 0.0992032 | 0.0792789 |
| G0:001097 | 143 | 0.4214813 | 1.3516837 | 0.0141988 | 0.0992637 | 0.0793272 |
| G0:004545 | 60  | 0.4905575 | 1.4483254 | 0.0142077 | 0.0992637 | 0.0793272 |
| G0:004343 | 153 | 0.4229945 | 1.359063  | 0.0142421 | 0.0994263 | 0.0794572 |
| G0:004591 | 76  | -0.397938 | -1.583035 | 0.0142857 | 0.0996524 | 0.0796379 |

|                      |     |           |           |           |           |           |
|----------------------|-----|-----------|-----------|-----------|-----------|-----------|
| G0:00162660-glycan r | 56  | 0.5021125 | 1.4619746 | 0.0143014 | 0.0996838 | 0.079663  |
| G0:2001244positive r | 55  | 0.505002  | 1.4657763 | 0.0143965 | 0.1002675 | 0.0801294 |
| G0:000602aminoglyca  | 112 | 0.444799  | 1.3986879 | 0.0144479 | 0.1005442 | 0.0803506 |
| G0:000865cellular e  | 77  | -0.617174 | -2.460431 | 0.0144928 | 0.1005442 | 0.0803506 |
| G0:004583negative r  | 79  | -0.400144 | -1.609002 | 0.0144928 | 0.1005442 | 0.0803506 |
| G0:005509sterol hom  | 79  | -0.555696 | -2.234487 | 0.0144928 | 0.1005442 | 0.0803506 |
| G0:190004regulator   | 79  | -0.506557 | -2.036898 | 0.0144928 | 0.1005442 | 0.0803506 |
| G0:000653glutamate   | 8   | -0.763874 | -1.753608 | 0.0145631 | 0.100895  | 0.0806309 |
| G0:000200regulator   | 11  | -0.687911 | -1.755295 | 0.0146341 | 0.100895  | 0.0806309 |
| G0:000200angiotensi  | 11  | -0.687911 | -1.755295 | 0.0146341 | 0.100895  | 0.0806309 |
| G0:000606ethanol ca  | 11  | -0.691454 | -1.764335 | 0.0146341 | 0.100895  | 0.0806309 |
| G0:000670androgen k  | 11  | -0.713456 | -1.820477 | 0.0146341 | 0.100895  | 0.0806309 |
| G0:000908methionine  | 11  | -0.701999 | -1.791242 | 0.0146341 | 0.100895  | 0.0806309 |
| G0:003437very-low-c  | 11  | -0.659499 | -1.682797 | 0.0146341 | 0.100895  | 0.0806309 |
| G0:005066homocystei  | 11  | -0.699941 | -1.78599  | 0.0146341 | 0.100895  | 0.0806309 |
| G0:000196lpositive r | 46  | 0.5193368 | 1.4661437 | 0.0147059 | 0.1009978 | 0.0807131 |
| G0:000676water-solu  | 81  | -0.37453  | -1.515061 | 0.0147059 | 0.1009978 | 0.0807131 |
| G0:003030lcholesterc | 81  | -0.491306 | -1.987448 | 0.0147059 | 0.1009978 | 0.0807131 |
| G0:004592positive r  | 34  | -0.526321 | -1.799773 | 0.0147059 | 0.1009978 | 0.0807131 |
| G0:005081regulator   | 81  | -0.509192 | -2.059801 | 0.0147059 | 0.1009978 | 0.0807131 |
| G0:004211macrophage  | 87  | 0.4626298 | 1.415909  | 0.0148462 | 0.1014498 | 0.0810743 |
| G0:001087positive r  | 9   | -0.739027 | -1.757201 | 0.0148515 | 0.1014498 | 0.0810743 |
| G0:003003microvillu  | 16  | 0.6410243 | 1.4888448 | 0.0148515 | 0.1014498 | 0.0810743 |
| G0:003444very-low-c  | 9   | -0.74284  | -1.766269 | 0.0148515 | 0.1014498 | 0.0810743 |
| G0:190447regulator   | 9   | -0.762631 | -1.813325 | 0.0148515 | 0.1014498 | 0.0810743 |
| G0:004276DNA damage  | 38  | 0.5320417 | 1.4705513 | 0.0148571 | 0.1014498 | 0.0810743 |
| G0:000611energy res  | 78  | -0.490493 | -1.967501 | 0.0149254 | 0.1014498 | 0.0810743 |
| G0:000703lperoxisome | 78  | -0.634221 | -2.544031 | 0.0149254 | 0.1014498 | 0.0810743 |
| G0:003019regulator   | 78  | -0.515795 | -2.068992 | 0.0149254 | 0.1014498 | 0.0810743 |
| G0:003430primary al  | 78  | -0.633699 | -2.541938 | 0.0149254 | 0.1014498 | 0.0810743 |
| G0:004263lcholesterc | 78  | -0.567069 | -2.274668 | 0.0149254 | 0.1014498 | 0.0810743 |
| G0:004688positive r  | 78  | -0.39964  | -1.603063 | 0.0149254 | 0.1014498 | 0.0810743 |
| G0:004320response t  | 848 | 0.3472816 | 1.1818311 | 0.014985  | 0.1014498 | 0.0810743 |
| G0:004881neuron pro  | 625 | 0.3565109 | 1.2076459 | 0.014985  | 0.1014498 | 0.0810743 |
| G0:005170response t  | 846 | 0.3484207 | 1.185504  | 0.014985  | 0.1014498 | 0.0810743 |
| G0:007259establishm  | 515 | 0.3601504 | 1.2143832 | 0.014985  | 0.1014498 | 0.0810743 |
| G0:000743lsalivary g | 37  | 0.5313107 | 1.4562968 | 0.0149942 | 0.1014498 | 0.0810743 |
| G0:001056regulator   | 37  | 0.5321798 | 1.458679  | 0.0149942 | 0.1014498 | 0.0810743 |
| G0:003158cell-subst  | 338 | 0.3839847 | 1.280629  | 0.015     | 0.1014498 | 0.0810743 |
| G0:004583negative r  | 9   | 0.7616722 | 1.5607006 | 0.015     | 0.1014498 | 0.0810743 |
| G0:003264regulator   | 76  | 0.4656857 | 1.4121652 | 0.0150215 | 0.1015176 | 0.0811285 |
| G0:005195positive r  | 35  | -0.524967 | -1.808252 | 0.0150376 | 0.1015495 | 0.0811539 |
| G0:000716negative r  | 254 | 0.390797  | 1.2901522 | 0.0150905 | 0.1018297 | 0.0813778 |
| G0:001921regulator   | 85  | -0.489137 | -2.015006 | 0.0151515 | 0.1021635 | 0.0816447 |
| G0:000656L-serine c  | 5   | -0.849536 | -1.728917 | 0.0152091 | 0.1021644 | 0.0816454 |
| G0:000940toxin bios  | 5   | -0.873544 | -1.777776 | 0.0152091 | 0.1021644 | 0.0816454 |
| G0:003419acylglycer  | 5   | -0.884585 | -1.800246 | 0.0152091 | 0.1021644 | 0.0816454 |
| G0:003419triglyceri  | 5   | -0.884585 | -1.800246 | 0.0152091 | 0.1021644 | 0.0816454 |
| G0:190506positive r  | 5   | -0.887411 | -1.805998 | 0.0152091 | 0.1021644 | 0.0816454 |
| G0:004827vesicle dc  | 63  | 0.4875873 | 1.4421863 | 0.0152505 | 0.1023652 | 0.0818059 |
| G0:004512cellular e  | 58  | 0.4932697 | 1.4469428 | 0.0152838 | 0.102434  | 0.0818608 |

|                      |     |           |           |           |           |           |
|----------------------|-----|-----------|-----------|-----------|-----------|-----------|
| GO:190437positive r  | 62  | 0.487673  | 1.4396115 | 0.0152838 | 0.102434  | 0.0818608 |
| GO:005149negative r  | 134 | 0.4294863 | 1.3717036 | 0.0153218 | 0.1025566 | 0.0819588 |
| GO:003272positive r  | 22  | 0.6063819 | 1.523366  | 0.0153483 | 0.1025566 | 0.0819588 |
| GO:004810somatic st  | 22  | 0.6062676 | 1.5230789 | 0.0153483 | 0.1025566 | 0.0819588 |
| GO:009018regulator   | 22  | 0.6063823 | 1.5233671 | 0.0153483 | 0.1025566 | 0.0819588 |
| GO:004217xenobiotic  | 12  | -0.690551 | -1.82671  | 0.0153846 | 0.1026347 | 0.0820212 |
| GO:009885intestinal  | 17  | -0.626305 | -1.863938 | 0.0153846 | 0.1026347 | 0.0820212 |
| GO:004564regulator   | 21  | 0.613132  | 1.519998  | 0.0154211 | 0.1026347 | 0.0820212 |
| GO:005168establishm  | 7   | 0.7822015 | 1.5099697 | 0.015444  | 0.1026347 | 0.0820212 |
| GO:008502protein K   | 7   | 0.7810173 | 1.5076837 | 0.015444  | 0.1026347 | 0.0820212 |
| GO:000653cysteine n  | 16  | -0.681343 | -1.986463 | 0.0154639 | 0.1026347 | 0.0820212 |
| GO:006019negative r  | 16  | -0.665506 | -1.94029  | 0.0154639 | 0.1026347 | 0.0820212 |
| GO:007087positive r  | 16  | -0.659352 | -1.922348 | 0.0154639 | 0.1026347 | 0.0820212 |
| GO:007248ammonium t  | 16  | -0.664521 | -1.937417 | 0.0154639 | 0.1026347 | 0.0820212 |
| GO:000656tryptophar  | 10  | -0.741611 | -1.807453 | 0.015544  | 0.1027062 | 0.0820784 |
| GO:003437chylomicro  | 10  | -0.727798 | -1.773788 | 0.015544  | 0.1027062 | 0.0820784 |
| GO:004243indole-cor  | 10  | -0.741611 | -1.807453 | 0.015544  | 0.1027062 | 0.0820784 |
| GO:004621indolalkyl  | 10  | -0.741611 | -1.807453 | 0.015544  | 0.1027062 | 0.0820784 |
| GO:004632negative r  | 10  | -0.746723 | -1.819912 | 0.015544  | 0.1027062 | 0.0820784 |
| GO:004643L-cysteine  | 10  | -0.754519 | -1.838911 | 0.015544  | 0.1027062 | 0.0820784 |
| GO:009700regulator   | 82  | -0.438784 | -1.768118 | 0.015625  | 0.1031645 | 0.0824446 |
| GO:190595negative r  | 40  | -0.522737 | -1.821056 | 0.015748  | 0.1038854 | 0.0830207 |
| GO:000257regulator   | 20  | 0.6189935 | 1.5149769 | 0.0157576 | 0.1038854 | 0.0830207 |
| GO:001400glial cell  | 44  | 0.528397  | 1.4822335 | 0.015873  | 0.1042463 | 0.0833092 |
| GO:003029intestinal  | 15  | -0.655301 | -1.850783 | 0.015873  | 0.1042463 | 0.0833092 |
| GO:003508establishm  | 18  | 0.6348537 | 1.5146848 | 0.015873  | 0.1042463 | 0.0833092 |
| GO:004632positive r  | 15  | -0.664453 | -1.876633 | 0.015873  | 0.1042463 | 0.0833092 |
| GO:009017organelle   | 93  | 0.4516546 | 1.390588  | 0.015873  | 0.1042463 | 0.0833092 |
| GO:003598endodermal  | 45  | 0.5173364 | 1.4534819 | 0.0159272 | 0.1042463 | 0.0833092 |
| GO:003362regulator   | 13  | 0.6706471 | 1.5000342 | 0.0159314 | 0.1042463 | 0.0833092 |
| GO:003572interleuki  | 13  | 0.6702518 | 1.49915   | 0.0159314 | 0.1042463 | 0.0833092 |
| GO:007135cellular r  | 13  | 0.6702518 | 1.49915   | 0.0159314 | 0.1042463 | 0.0833092 |
| GO:000691autophagy   | 470 | 0.3671625 | 1.2339761 | 0.015984  | 0.1042463 | 0.0833092 |
| GO:000960response t  | 879 | 0.3438654 | 1.1713288 | 0.015984  | 0.1042463 | 0.0833092 |
| GO:004360amide bios  | 730 | 0.3492774 | 1.1860447 | 0.015984  | 0.1042463 | 0.0833092 |
| GO:006191process ut  | 470 | 0.3671625 | 1.2339761 | 0.015984  | 0.1042463 | 0.0833092 |
| GO:007057negative r  | 15  | 0.6507088 | 1.4952526 | 0.0159902 | 0.1042463 | 0.0833092 |
| GO:006109regulator   | 82  | 0.4556465 | 1.387504  | 0.0159915 | 0.1042463 | 0.0833092 |
| GO:000225adaptive i  | 385 | 0.3732128 | 1.2490994 | 0.016     | 0.1042463 | 0.0833092 |
| GO:009055regulator   | 77  | 0.4709028 | 1.427446  | 0.0160772 | 0.1044625 | 0.0834819 |
| GO:014002exocytic p  | 77  | 0.4678247 | 1.4181154 | 0.0160772 | 0.1044625 | 0.0834819 |
| GO:000707mitotic ch  | 16  | 0.6401454 | 1.4868035 | 0.0160891 | 0.1044625 | 0.0834819 |
| GO:001998translesic  | 39  | 0.5320142 | 1.4730759 | 0.016092  | 0.1044625 | 0.0834819 |
| GO:003274positive r  | 29  | 0.5719781 | 1.5187273 | 0.016092  | 0.1044625 | 0.0834819 |
| GO:0051031tRNA trans | 34  | 0.5424339 | 1.4725184 | 0.0161663 | 0.1048684 | 0.0838063 |
| GO:006078hair folli  | 5   | 0.8359047 | 1.5086137 | 0.0162382 | 0.1052579 | 0.0841175 |
| GO:000307regulator   | 89  | -0.377724 | -1.570139 | 0.0163934 | 0.1059553 | 0.0846749 |
| GO:004325regulator   | 90  | -0.372578 | -1.567511 | 0.0163934 | 0.1059553 | 0.0846749 |
| GO:005128protein hc  | 90  | -0.358982 | -1.510307 | 0.0163934 | 0.1059553 | 0.0846749 |
| GO:190157fatty acid  | 89  | -0.334596 | -1.390863 | 0.0163934 | 0.1059553 | 0.0846749 |
| GO:003252microvillu  | 24  | 0.5893149 | 1.5023126 | 0.0164512 | 0.1061744 | 0.08485   |

|           |            |     |           |           |           |           |           |
|-----------|------------|-----|-----------|-----------|-----------|-----------|-----------|
| G0:006121 | regulation | 25  | 0.5802072 | 1.4925243 | 0.0164512 | 0.1061744 | 0.08485   |
| G0:003129 | T cell cos | 55  | 0.4955202 | 1.4382551 | 0.0166113 | 0.1069966 | 0.085507  |
| G0:009018 | regulation | 55  | 0.4942441 | 1.4345511 | 0.0166113 | 0.1069966 | 0.085507  |
| G0:003809 | Fc-epsil   | 109 | 0.4475835 | 1.3999265 | 0.0166147 | 0.1069966 | 0.085507  |
| G0:006151 | macrophage | 7   | 0.7768056 | 1.4995534 | 0.016731  | 0.1075894 | 0.0859808 |
| G0:006151 | microglial | 7   | 0.7768056 | 1.4995534 | 0.016731  | 0.1075894 | 0.0859808 |
| G0:003264 | regulation | 47  | 0.5125887 | 1.4553588 | 0.0167598 | 0.1076964 | 0.0860663 |
| G0:001931 | hexose bic | 87  | -0.483134 | -1.978904 | 0.0169492 | 0.108756  | 0.0869131 |
| G0:190303 | negative r | 87  | -0.436582 | -1.788226 | 0.0169492 | 0.108756  | 0.0869131 |
| G0:006156 | axon devel | 495 | 0.3592298 | 1.2094829 | 0.016983  | 0.1088947 | 0.0870239 |
| G0:005109 | regulation | 406 | 0.3704704 | 1.242016  | 0.017     | 0.108925  | 0.0870482 |
| G0:004581 | negative r | 85  | 0.4556437 | 1.3899464 | 0.017094  | 0.109346  | 0.0873846 |
| G0:003450 | protein lc | 249 | 0.3882293 | 1.2814324 | 0.0171026 | 0.109346  | 0.0873846 |
| G0:004340 | positive r | 244 | 0.3872425 | 1.2772847 | 0.0171026 | 0.109346  | 0.0873846 |
| G0:004858 | developmer | 215 | 0.3968526 | 1.3049637 | 0.0171371 | 0.1094877 | 0.0874978 |
| G0:000267 | regulation | 91  | -0.517457 | -2.198754 | 0.0172414 | 0.1098381 | 0.0877778 |
| G0:004364 | dicarboxyl | 91  | -0.574975 | -2.443156 | 0.0172414 | 0.1098381 | 0.0877778 |
| G0:004407 | regulation | 91  | -0.372758 | -1.583906 | 0.0172414 | 0.1098381 | 0.0877778 |
| G0:007237 | protein ac | 91  | -0.676842 | -2.876004 | 0.0172414 | 0.1098381 | 0.0877778 |
| G0:190122 | positive r | 74  | 0.4679283 | 1.4123348 | 0.0172786 | 0.1099876 | 0.0878973 |
| G0:004500 | DNA-depend | 37  | 0.5288701 | 1.4496073 | 0.017301  | 0.1099876 | 0.0878973 |
| G0:003039 | membrane c | 16  | 0.6367541 | 1.4789268 | 0.0173267 | 0.1099876 | 0.0878973 |
| G0:005108 | nuclear er | 16  | 0.6367541 | 1.4789268 | 0.0173267 | 0.1099876 | 0.0878973 |
| G0:005144 | negative r | 16  | 0.6371106 | 1.4797549 | 0.0173267 | 0.1099876 | 0.0878973 |
| G0:003133 | regulation | 27  | 0.5763934 | 1.5095729 | 0.0173611 | 0.1101272 | 0.0880089 |
| G0:004678 | regulation | 63  | 0.4831744 | 1.4291338 | 0.0174292 | 0.1103413 | 0.08818   |
| G0:000263 | regulation | 9   | 0.7492553 | 1.5352578 | 0.0175    | 0.1103413 | 0.08818   |
| G0:004660 | regulation | 9   | 0.7497023 | 1.5361738 | 0.0175    | 0.1103413 | 0.08818   |
| G0:001082 | positive r | 113 | 0.4390077 | 1.3816568 | 0.0175258 | 0.1103413 | 0.08818   |
| G0:000152 | retinoid n | 92  | -0.610495 | -2.602602 | 0.0175439 | 0.1103413 | 0.08818   |
| G0:000683 | dicarboxyl | 93  | -0.332233 | -1.410657 | 0.0175439 | 0.1103413 | 0.08818   |
| G0:001590 | fatty acid | 92  | -0.456099 | -1.944393 | 0.0175439 | 0.1103413 | 0.08818   |
| G0:001591 | sterol tra | 93  | -0.435228 | -1.847971 | 0.0175439 | 0.1103413 | 0.08818   |
| G0:004426 | cellular p | 93  | -0.402407 | -1.708614 | 0.0175439 | 0.1103413 | 0.08818   |
| G0:004636 | monosaccha | 93  | -0.443187 | -1.881764 | 0.0175439 | 0.1103413 | 0.08818   |
| G0:005159 | response t | 92  | -0.452132 | -1.927483 | 0.0175439 | 0.1103413 | 0.08818   |
| G0:009027 | positive r | 93  | -0.358783 | -1.523387 | 0.0175439 | 0.1103413 | 0.08818   |
| G0:006005 | positive r | 8   | 0.7668325 | 1.5300947 | 0.0175879 | 0.1105403 | 0.088339  |
| G0:190122 | regulation | 101 | 0.4402713 | 1.370536  | 0.0176899 | 0.110871  | 0.0886033 |
| G0:004222 | interleuki | 23  | 0.5922058 | 1.4954809 | 0.0177096 | 0.110871  | 0.0886033 |
| G0:190307 | positive r | 55  | 0.4935511 | 1.4325396 | 0.0177187 | 0.110871  | 0.0886033 |
| G0:000656 | threonine  | 7   | -0.770733 | -1.742677 | 0.0177778 | 0.110871  | 0.0886033 |
| G0:001953 | taurine me | 7   | -0.817849 | -1.849209 | 0.0177778 | 0.110871  | 0.0886033 |
| G0:001969 | alkanesulf | 7   | -0.817849 | -1.849209 | 0.0177778 | 0.110871  | 0.0886033 |
| G0:003030 | regulation | 7   | -0.78873  | -1.783369 | 0.0177778 | 0.110871  | 0.0886033 |
| G0:003248 | regulation | 7   | -0.79324  | -1.793568 | 0.0177778 | 0.110871  | 0.0886033 |
| G0:003535 | cellular t | 7   | -0.799172 | -1.806979 | 0.0177778 | 0.110871  | 0.0886033 |
| G0:009705 | L-kynureni | 7   | -0.813405 | -1.839161 | 0.0177778 | 0.110871  | 0.0886033 |
| G0:190472 | regulation | 7   | -0.78873  | -1.783369 | 0.0177778 | 0.110871  | 0.0886033 |
| G0:003444 | substrate  | 99  | 0.4449023 | 1.381095  | 0.017801  | 0.1109382 | 0.088657  |
| G0:005115 | regulation | 95  | 0.446075  | 1.3789863 | 0.0178197 | 0.1109767 | 0.0886878 |



|           |               |     |           |           |           |           |           |
|-----------|---------------|-----|-----------|-----------|-----------|-----------|-----------|
| G0:007020 | regulation of | 703 | 0.3475521 | 1.180338  | 0.017982  | 0.1118981 | 0.0894241 |
| G0:001050 | regulation of | 309 | 0.3772561 | 1.2560193 | 0.018     | 0.1118981 | 0.0894241 |
| G0:190412 | microglial    | 7   | 0.7726661 | 1.4915623 | 0.018018  | 0.1118981 | 0.0894241 |
| G0:190413 | regulation of | 7   | 0.7726661 | 1.4915623 | 0.018018  | 0.1118981 | 0.0894241 |
| G0:001607 | snRNA meta    | 89  | 0.4505444 | 1.3786854 | 0.0180659 | 0.112117  | 0.089599  |
| G0:000667 | ceramide n    | 85  | 0.4539252 | 1.3847042 | 0.0181624 | 0.1125587 | 0.089952  |
| G0:004563 | positive r    | 85  | 0.4543639 | 1.3860425 | 0.0181624 | 0.1125587 | 0.089952  |
| G0:004693 | pore compl    | 20  | 0.6148661 | 1.5048751 | 0.0181818 | 0.1125811 | 0.0899699 |
| G0:004558 | positive r    | 79  | 0.463814  | 1.4094094 | 0.0182208 | 0.1125811 | 0.0899699 |
| G0:001624 | regulation of | 164 | 0.4128604 | 1.3323902 | 0.0182371 | 0.1125811 | 0.0899699 |
| G0:005077 | regulation of | 178 | 0.408594  | 1.3237648 | 0.0182741 | 0.1125811 | 0.0899699 |
| G0:003164 | regulation of | 41  | 0.5209119 | 1.4490504 | 0.0182857 | 0.1125811 | 0.0899699 |
| G0:007162 | regulation of | 41  | 0.522295  | 1.452898  | 0.0182857 | 0.1125811 | 0.0899699 |
| G0:009702 | dendritic     | 41  | 0.5232204 | 1.4554721 | 0.0182857 | 0.1125811 | 0.0899699 |
| G0:009892 | vesicle-me    | 40  | 0.5172154 | 1.4365311 | 0.0182857 | 0.1125811 | 0.0899699 |
| G0:003596 | cellular r    | 152 | 0.4169823 | 1.339639  | 0.0182927 | 0.1125811 | 0.0899699 |
| G0:005110 | (negative r   | 156 | 0.4183919 | 1.3475583 | 0.0182927 | 0.1125811 | 0.0899699 |
| G0:009023 | regulation of | 14  | 0.6454186 | 1.4685633 | 0.0183824 | 0.1126515 | 0.0900262 |
| G0:009026 | regulation of | 14  | 0.6454186 | 1.4685633 | 0.0183824 | 0.1126515 | 0.0900262 |
| G0:190350 | regulation of | 14  | 0.6454186 | 1.4685633 | 0.0183824 | 0.1126515 | 0.0900262 |
| G0:190499 | regulation of | 19  | 0.6247267 | 1.5041268 | 0.0183824 | 0.1126515 | 0.0900262 |
| G0:190551 | (positive r   | 13  | 0.6648945 | 1.4871672 | 0.0183824 | 0.1126515 | 0.0900262 |
| G0:005071 | (positive r   | 127 | 0.426722  | 1.3598544 | 0.0183861 | 0.1126515 | 0.0900262 |
| G0:004646 | membrane l    | 132 | 0.4223029 | 1.3469781 | 0.0184049 | 0.1126515 | 0.0900262 |
| G0:004476 | multi-orga    | 71  | 0.4697905 | 1.4129325 | 0.0184182 | 0.1126515 | 0.0900262 |
| G0:190257 | (multi-orga   | 71  | 0.4697905 | 1.4129325 | 0.0184182 | 0.1126515 | 0.0900262 |
| G0:000729 | female gan    | 120 | 0.4303388 | 1.365034  | 0.0184426 | 0.1127232 | 0.0900835 |
| G0:004213 | neurotrans    | 94  | -0.318246 | -1.350128 | 0.0185185 | 0.1129862 | 0.0902937 |
| G0:006019 | regulation of | 94  | -0.38742  | -1.643592 | 0.0185185 | 0.1129862 | 0.0902937 |
| G0:000256 | somatic di    | 58  | 0.4864423 | 1.4269156 | 0.018559  | 0.1129862 | 0.0902937 |
| G0:001644 | somatic ce    | 58  | 0.4864423 | 1.4269156 | 0.018559  | 0.1129862 | 0.0902937 |
| G0:006013 | maternal p    | 62  | 0.4819288 | 1.4226544 | 0.018559  | 0.1129862 | 0.0902937 |
| G0:003088 | (negative r   | 16  | 0.6315762 | 1.4669006 | 0.0185644 | 0.1129862 | 0.0902937 |
| G0:190390 | (positive r   | 60  | 0.4872615 | 1.4385943 | 0.0185792 | 0.1129862 | 0.0902937 |
| G0:001581 | glycine tr    | 12  | 0.70157   | 1.5399512 | 0.0185874 | 0.1129862 | 0.0902937 |
| G0:005085 | B cell rec    | 57  | 0.4937425 | 1.441914  | 0.0186404 | 0.1132309 | 0.0904892 |
| G0:000304 | regulation of | 47  | -0.430284 | -1.568937 | 0.0186916 | 0.1133721 | 0.0906021 |
| G0:004427 | sulfur con    | 49  | -0.407943 | -1.517873 | 0.0186916 | 0.1133721 | 0.0906021 |
| G0:200040 | regulation of | 56  | 0.4872716 | 1.4187631 | 0.0187019 | 0.1133721 | 0.0906021 |
| G0:003031 | poly-N-ace    | 9   | 0.7438932 | 1.5242707 | 0.01875   | 0.113509  | 0.0907115 |
| G0:200027 | regulation of | 102 | 0.4387791 | 1.3660101 | 0.01875   | 0.113509  | 0.0907115 |
| G0:000682 | chloride t    | 104 | 0.4355951 | 1.3583782 | 0.0187696 | 0.11355   | 0.0907443 |
| G0:004634 | amino suga    | 11  | 0.7203912 | 1.5464556 | 0.0188206 | 0.1137813 | 0.0909291 |
| G0:003362 | (positive r   | 8   | 0.7633383 | 1.5231225 | 0.0188442 | 0.1138221 | 0.0909617 |
| G0:003631 | cellular r    | 21  | -0.557316 | -1.715701 | 0.0188679 | 0.1138221 | 0.0909617 |
| G0:001632 | female mei    | 5   | 0.8284343 | 1.4951313 | 0.0189445 | 0.1138221 | 0.0909617 |
| G0:003207 | (positive r   | 5   | 0.8262422 | 1.4911751 | 0.0189445 | 0.1138221 | 0.0909617 |
| G0:007270 | (response t   | 5   | 0.8271386 | 1.4927929 | 0.0189445 | 0.1138221 | 0.0909617 |
| G0:190221 | (negative r   | 5   | 0.8306789 | 1.4991822 | 0.0189445 | 0.1138221 | 0.0909617 |
| G0:000703 | vacuolar e    | 21  | 0.6067241 | 1.5041125 | 0.0189798 | 0.1138221 | 0.0909617 |
| G0:001905 | modulation of | 21  | 0.6044662 | 1.498515  | 0.0189798 | 0.1138221 | 0.0909617 |

|                        |     |           |           |           |           |           |
|------------------------|-----|-----------|-----------|-----------|-----------|-----------|
| GO:0000165MAPK cascade | 881 | 0.3417572 | 1.1639703 | 0.018981  | 0.1138221 | 0.0909617 |
| GO:0002255activation   | 572 | 0.355558  | 1.2014776 | 0.018981  | 0.1138221 | 0.0909617 |
| GO:0090066regulation   | 478 | 0.3637687 | 1.2244242 | 0.018981  | 0.1138221 | 0.0909617 |
| GO:1905114cell surface | 589 | 0.357174  | 1.2084645 | 0.018981  | 0.1138221 | 0.0909617 |
| GO:0010976positive r   | 262 | 0.3843298 | 1.2714096 | 0.0190381 | 0.1140675 | 0.0911578 |
| GO:0030148sphingolip   | 93  | 0.4445412 | 1.3686868 | 0.0190476 | 0.1140675 | 0.0911578 |
| GO:0006906vesicle fu   | 87  | 0.4485716 | 1.3728828 | 0.019088  | 0.1141556 | 0.0912282 |
| GO:0070126mitochondr   | 88  | 0.4504599 | 1.3785703 | 0.019088  | 0.1141556 | 0.0912282 |
| GO:0003335amino acid   | 82  | 0.4527862 | 1.3787941 | 0.0191898 | 0.1146869 | 0.0916528 |
| GO:0031047gene siler   | 156 | 0.4165362 | 1.3415815 | 0.0193089 | 0.1153216 | 0.09216   |
| GO:0009067aspartate    | 22  | -0.528442 | -1.669821 | 0.0193548 | 0.1153631 | 0.0921932 |
| GO:0010226response t   | 22  | -0.552659 | -1.746345 | 0.0193548 | 0.1153631 | 0.0921932 |
| GO:0042355vitamin D    | 22  | -0.542129 | -1.713071 | 0.0193548 | 0.1153631 | 0.0921932 |
| GO:1902904negative r   | 127 | 0.423408  | 1.3492937 | 0.0194076 | 0.1155998 | 0.0923824 |
| GO:1903322positive r   | 124 | 0.424748  | 1.3527632 | 0.0194274 | 0.1156405 | 0.0924149 |
| GO:0010872regulation   | 11  | -0.649492 | -1.657263 | 0.0195122 | 0.1160675 | 0.0927561 |
| GO:0008035tRNA proce   | 118 | 0.4272049 | 1.3511197 | 0.0195272 | 0.1160793 | 0.0927655 |
| GO:0007215G protein-   | 19  | 0.6231545 | 1.5003416 | 0.0196078 | 0.1164027 | 0.093024  |
| GO:0030968endoplasmic  | 116 | 0.4299762 | 1.3574495 | 0.0196078 | 0.1164027 | 0.093024  |
| GO:0070198protein loc  | 27  | 0.5734284 | 1.5018074 | 0.0196759 | 0.1167289 | 0.0932847 |
| GO:0006024glycosamin   | 108 | 0.4374265 | 1.3669772 | 0.0197095 | 0.1168504 | 0.0933818 |
| GO:0030306poly-N-ace   | 10  | 0.7399377 | 1.5556616 | 0.0197775 | 0.1171751 | 0.0936413 |
| GO:0048535lymph node   | 17  | 0.6326142 | 1.4849547 | 0.0198265 | 0.1173873 | 0.0938108 |
| GO:0003071renal syst   | 25  | -0.503728 | -1.650088 | 0.0198675 | 0.1173956 | 0.0938174 |
| GO:0005975regulation   | 26  | -0.513799 | -1.698922 | 0.0198675 | 0.1173956 | 0.0938174 |
| GO:0010962regulation   | 26  | -0.513799 | -1.698922 | 0.0198675 | 0.1173956 | 0.0938174 |
| GO:0043525positive r   | 54  | 0.4882366 | 1.4131156 | 0.0199778 | 0.1179033 | 0.0942232 |
| GO:0016045cell growth  | 453 | 0.3656777 | 1.2283935 | 0.01998   | 0.1179033 | 0.0942232 |
| GO:0097705connective   | 9   | 0.7427869 | 1.5220039 | 0.02      | 0.1179429 | 0.0942549 |
| GO:0045408regulation   | 22  | 0.5993584 | 1.5057214 | 0.0200708 | 0.1181063 | 0.0943854 |
| GO:0015744succinate    | 6   | -0.851562 | -1.839759 | 0.0200803 | 0.1181063 | 0.0943854 |
| GO:0071422succinate    | 6   | -0.851562 | -1.839759 | 0.0200803 | 0.1181063 | 0.0943854 |
| GO:0009126deoxyribon   | 8   | 0.7515588 | 1.4996184 | 0.0201005 | 0.1181063 | 0.0943854 |
| GO:0033125positive r   | 8   | 0.7526464 | 1.5017885 | 0.0201005 | 0.1181063 | 0.0943854 |
| GO:2001235positive r   | 49  | 0.5068671 | 1.4455429 | 0.0201117 | 0.1181063 | 0.0943854 |
| GO:0045927positive r   | 245 | 0.3863183 | 1.2741483 | 0.0201207 | 0.1181063 | 0.0943854 |
| GO:0045065regulation   | 87  | 0.444498  | 1.3604153 | 0.0201485 | 0.1181131 | 0.0943908 |
| GO:0070126mitochondr   | 87  | 0.4456715 | 1.364007  | 0.0201485 | 0.1181131 | 0.0943908 |
| GO:0007335single fer   | 137 | 0.4157189 | 1.331858  | 0.0203046 | 0.1189138 | 0.0950308 |
| GO:0002224toll-like    | 141 | 0.4158342 | 1.3313527 | 0.0203252 | 0.1189138 | 0.0950308 |
| GO:0010215response t   | 138 | 0.4170093 | 1.3356211 | 0.0203252 | 0.1189138 | 0.0950308 |
| GO:0042268regulation   | 17  | -0.603457 | -1.795941 | 0.0205128 | 0.1199325 | 0.0958449 |
| GO:1905446regulation   | 7   | 0.7694727 | 1.4853979 | 0.020592  | 0.1203164 | 0.0961517 |
| GO:0043255sodium-inc   | 16  | -0.625037 | -1.822302 | 0.0206186 | 0.1203923 | 0.0962123 |
| GO:0044315wound heal   | 28  | 0.5595747 | 1.4772594 | 0.0206659 | 0.1204314 | 0.0962435 |
| GO:0090505epiboly in   | 28  | 0.5595747 | 1.4772594 | 0.0206659 | 0.1204314 | 0.0962435 |
| GO:0150077regulation   | 28  | 0.5686551 | 1.5012314 | 0.0206659 | 0.1204314 | 0.0962435 |
| GO:0032006positive r   | 10  | -0.704119 | -1.716076 | 0.0207254 | 0.1206199 | 0.0963942 |
| GO:2000121regulation   | 10  | -0.699362 | -1.704482 | 0.0207254 | 0.1206199 | 0.0963942 |
| GO:0045786positive r   | 18  | 0.6229495 | 1.4862828 | 0.020757  | 0.1206459 | 0.096415  |
| GO:0046855positive r   | 18  | 0.6229495 | 1.4862828 | 0.020757  | 0.1206459 | 0.096415  |

|            |            |     |           |           |           |           |           |
|------------|------------|-----|-----------|-----------|-----------|-----------|-----------|
| G0:000664l | triglyceri | 97  | -0.681659 | -2.89398  | 0.0208333 | 0.1206948 | 0.0964541 |
| G0:001583f | amine trar | 95  | -0.331355 | -1.396554 | 0.0208333 | 0.1206948 | 0.0964541 |
| G0:001895f | phenol-cor | 96  | -0.388678 | -1.640881 | 0.0208333 | 0.1206948 | 0.0964541 |
| G0:002260f | digestive  | 95  | -0.336788 | -1.419455 | 0.0208333 | 0.1206948 | 0.0964541 |
| G0:006201f | negative r | 95  | -0.420086 | -1.770529 | 0.0208333 | 0.1206948 | 0.0964541 |
| G0:003000f | cellular n | 104 | 0.4352185 | 1.3572038 | 0.0208551 | 0.120742  | 0.0964917 |
| G0:007026f | cornificat | 100 | 0.4349837 | 1.3530347 | 0.0208768 | 0.1207893 | 0.0965296 |
| G0:000290f | negative r | 12  | 0.6923471 | 1.5197067 | 0.0210657 | 0.1215017 | 0.0970989 |
| G0:200001f | positive r | 17  | 0.62987   | 1.4785132 | 0.0210657 | 0.1215017 | 0.0970989 |
| G0:200072f | negative r | 17  | 0.6296194 | 1.4779249 | 0.0210657 | 0.1215017 | 0.0970989 |
| G0:006076f | positive r | 53  | 0.493895  | 1.4231208 | 0.0211346 | 0.1215017 | 0.0970989 |
| G0:007055f | response t | 196 | 0.3978604 | 1.3036053 | 0.021148  | 0.1215017 | 0.0970989 |
| G0:190073f | regulator  | 26  | 0.5669802 | 1.4673922 | 0.0211516 | 0.1215017 | 0.0970989 |
| G0:190074f | positive r | 26  | 0.5669802 | 1.4673922 | 0.0211516 | 0.1215017 | 0.0970989 |
| G0:003443f | steroid es | 15  | -0.641329 | -1.811324 | 0.021164  | 0.1215017 | 0.0970989 |
| G0:003443f | sterol est | 15  | -0.641329 | -1.811324 | 0.021164  | 0.1215017 | 0.0970989 |
| G0:003443f | cholesterc | 15  | -0.641329 | -1.811324 | 0.021164  | 0.1215017 | 0.0970989 |
| G0:004365f | dicarboxyl | 15  | -0.604886 | -1.708396 | 0.021164  | 0.1215017 | 0.0970989 |
| G0:007036f | hepatocyte | 15  | -0.625529 | -1.766697 | 0.021164  | 0.1215017 | 0.0970989 |
| G0:007269f | protein lc | 50  | 0.5001188 | 1.4273449 | 0.0212054 | 0.1216393 | 0.0972089 |
| G0:000073l | DNA synthe | 49  | 0.5024195 | 1.4328588 | 0.0212291 | 0.1216393 | 0.0972089 |
| G0:006190f | glial cell | 49  | 0.5051226 | 1.4405677 | 0.0212291 | 0.1216393 | 0.0972089 |
| G0:000666f | sphingolip | 148 | 0.4139941 | 1.3306954 | 0.0212551 | 0.1216764 | 0.0972385 |
| G0:000663f | acyl-CoA n | 99  | -0.538202 | -2.312102 | 0.0212766 | 0.1216764 | 0.0972385 |
| G0:003538f | thioester  | 99  | -0.538202 | -2.312102 | 0.0212766 | 0.1216764 | 0.0972385 |
| G0:200067f | negative r | 21  | 0.6000053 | 1.487456  | 0.0213523 | 0.1220309 | 0.0975218 |
| G0:190353f | regulator  | 77  | 0.4587768 | 1.3906883 | 0.0214362 | 0.1224317 | 0.0978421 |
| G0:000749f | midgut dev | 13  | -0.655353 | -1.749779 | 0.0215054 | 0.1225903 | 0.0979689 |
| G0:005508f | anion home | 56  | -0.36251  | -1.399422 | 0.0215054 | 0.1225903 | 0.0979689 |
| G0:006008f | inhibitory | 14  | -0.632549 | -1.722688 | 0.0215054 | 0.1225903 | 0.0979689 |
| G0:001692f | protein su | 75  | 0.4588306 | 1.386235  | 0.0215285 | 0.1226436 | 0.0980114 |
| G0:190414f | positive r | 5   | 0.8214877 | 1.4825943 | 0.0216509 | 0.1232616 | 0.0985053 |
| G0:003089f | positive r | 41  | 0.5157669 | 1.4347384 | 0.0217143 | 0.1235434 | 0.0987306 |
| G0:004594f | positive r | 27  | -0.571088 | -1.876071 | 0.0217391 | 0.1236057 | 0.0987803 |
| G0:003264f | regulator  | 28  | 0.5587375 | 1.4750491 | 0.021814  | 0.1239521 | 0.0990571 |
| G0:005197f | positive r | 36  | 0.5288526 | 1.445712  | 0.0218894 | 0.124301  | 0.099336  |
| G0:006033f | regulator  | 34  | 0.5359263 | 1.4548525 | 0.02194   | 0.1245085 | 0.0995018 |
| G0:003220f | telomere n | 27  | 0.5655611 | 1.4812032 | 0.0219907 | 0.1247053 | 0.0996591 |
| G0:000647f | protein de | 306 | 0.3748756 | 1.2480197 | 0.022022  | 0.1247053 | 0.0996591 |
| G0:000911f | nucleobase | 34  | -0.508746 | -1.739673 | 0.0220588 | 0.1247053 | 0.0996591 |
| G0:003556f | positive r | 13  | 0.6586116 | 1.4731144 | 0.0220588 | 0.1247053 | 0.0996591 |
| G0:003579f | platelet-c | 14  | 0.6418297 | 1.460397  | 0.0220588 | 0.1247053 | 0.0996591 |
| G0:006157f | calcium ic | 13  | 0.659218  | 1.4744707 | 0.0220588 | 0.1247053 | 0.0996591 |
| G0:000906f | fatty acid | 105 | -0.759553 | -3.281203 | 0.0222222 | 0.1253061 | 0.1001392 |
| G0:001610f | diterpenoi | 98  | -0.611305 | -2.583987 | 0.0222222 | 0.1253061 | 0.1001392 |
| G0:001939f | fatty acid | 98  | -0.718745 | -3.038135 | 0.0222222 | 0.1253061 | 0.1001392 |
| G0:006005f | embryonic  | 7   | -0.761459 | -1.721709 | 0.0222222 | 0.1253061 | 0.1001392 |
| G0:003806f | collagen-a | 10  | 0.7307447 | 1.5363341 | 0.0222497 | 0.1253061 | 0.1001392 |
| G0:007009f | regulator  | 10  | 0.7358031 | 1.546969  | 0.0222497 | 0.1253061 | 0.1001392 |
| G0:003030f | negative r | 174 | 0.4037152 | 1.3086717 | 0.0222672 | 0.1253253 | 0.1001546 |
| G0:003158f | hemidesmos | 12  | 0.6833117 | 1.4998739 | 0.0223048 | 0.1253783 | 0.1001969 |

|                      |     |           |           |           |           |           |
|----------------------|-----|-----------|-----------|-----------|-----------|-----------|
| G0:015007positive r  | 12  | 0.6860931 | 1.5059791 | 0.0223048 | 0.1253783 | 0.1001969 |
| G0:190247L-alpha-an  | 50  | 0.4962289 | 1.4162429 | 0.0223214 | 0.1253922 | 0.1002081 |
| G0:0060147regulator  | 82  | 0.4479467 | 1.3640572 | 0.0223881 | 0.1256078 | 0.1003803 |
| G0:0060966regulator  | 82  | 0.4479467 | 1.3640572 | 0.0223881 | 0.1256078 | 0.1003803 |
| G0:0097577sequesteri | 6   | 0.79011   | 1.4724489 | 0.0225764 | 0.1265052 | 0.1010974 |
| G0:000971catechol-c  | 20  | -0.561498 | -1.742652 | 0.0225989 | 0.1265052 | 0.1010974 |
| G0:004242catecholan  | 20  | -0.561498 | -1.742652 | 0.0225989 | 0.1265052 | 0.1010974 |
| G0:003227negative r  | 68  | 0.4686537 | 1.4053546 | 0.022605  | 0.1265052 | 0.1010974 |
| G0:000669icosanoid   | 100 | -0.503348 | -2.159929 | 0.0227273 | 0.1267905 | 0.1013255 |
| G0:001574organophos  | 100 | -0.374923 | -1.60884  | 0.0227273 | 0.1267905 | 0.1013255 |
| G0:003236regulator   | 100 | -0.37777  | -1.621059 | 0.0227273 | 0.1267905 | 0.1013255 |
| G0:003355unsaturate  | 100 | -0.496624 | -2.131075 | 0.0227273 | 0.1267905 | 0.1013255 |
| G0:003444lipid oxid  | 100 | -0.707169 | -3.034549 | 0.0227273 | 0.1267905 | 0.1013255 |
| G0:000635DNA-temple  | 71  | 0.4666104 | 1.4033679 | 0.0227519 | 0.1268482 | 0.1013716 |
| G0:0044107cellular e | 5   | -0.829518 | -1.688179 | 0.0228137 | 0.1269538 | 0.101456  |
| G0:004410cellular e  | 5   | -0.829518 | -1.688179 | 0.0228137 | 0.1269538 | 0.101456  |
| G0:0070141response t | 5   | -0.83029  | -1.689748 | 0.0228137 | 0.1269538 | 0.101456  |
| G0:003260interferon  | 106 | 0.42961   | 1.3388771 | 0.0229406 | 0.12758   | 0.1019564 |
| G0:190544positive r  | 5   | 0.818843  | 1.4778212 | 0.0230041 | 0.1278337 | 0.1021592 |
| G0:005115negative r  | 35  | 0.53385   | 1.4547268 | 0.023015  | 0.1278337 | 0.1021592 |
| G0:005134negative r  | 255 | 0.3853383 | 1.272205  | 0.0231388 | 0.1283519 | 0.1025733 |
| G0:003565interleuki  | 7   | 0.7632239 | 1.473335  | 0.023166  | 0.1283519 | 0.1025733 |
| G0:0071351cellular r | 7   | 0.7632239 | 1.473335  | 0.023166  | 0.1283519 | 0.1025733 |
| G0:190302negative r  | 7   | 0.7632722 | 1.4734283 | 0.023166  | 0.1283519 | 0.1025733 |
| G0:0043011myeloid de | 18  | 0.6216906 | 1.483279  | 0.023199  | 0.1283692 | 0.1025871 |
| G0:000167long-chair  | 103 | -0.598507 | -2.568453 | 0.0232558 | 0.1283692 | 0.1025871 |
| G0:000597polysaccha  | 104 | -0.35959  | -1.54147  | 0.0232558 | 0.1283692 | 0.1025871 |
| G0:001090regulator   | 106 | -0.451992 | -1.961832 | 0.0232558 | 0.1283692 | 0.1025871 |
| G0:0051187cofactor c | 58  | -0.395596 | -1.516568 | 0.0232558 | 0.1283692 | 0.1025871 |
| G0:190160alpha-amir  | 103 | -0.766667 | -3.290101 | 0.0232558 | 0.1283692 | 0.1025871 |
| G0:0001771immunologi | 14  | 0.640343  | 1.4570144 | 0.0232843 | 0.1284467 | 0.1026491 |
| G0:000170endoderm f  | 50  | 0.4948774 | 1.4123859 | 0.0234375 | 0.1292116 | 0.1032603 |
| G0:190386positive r  | 10  | 0.727746  | 1.5300295 | 0.0234858 | 0.1293975 | 0.1034089 |
| G0:003250endosome t  | 25  | 0.5730729 | 1.4741719 | 0.0235018 | 0.1294053 | 0.1034151 |
| G0:001056negative r  | 12  | 0.6779657 | 1.4881394 | 0.023544  | 0.1295575 | 0.1035368 |
| G0:005089intestinal  | 38  | -0.49729  | -1.724015 | 0.023622  | 0.1299066 | 0.1038158 |
| G0:001907viral genc  | 113 | 0.4294976 | 1.3517263 | 0.0237113 | 0.1303171 | 0.1041437 |
| G0:0006911phagocytos | 46  | 0.509994  | 1.4397678 | 0.0237557 | 0.1304533 | 0.1042526 |
| G0:000758excretion   | 61  | -0.376609 | -1.465238 | 0.0238095 | 0.1304533 | 0.1042526 |
| G0:004668response t  | 59  | -0.389129 | -1.489532 | 0.0238095 | 0.1304533 | 0.1042526 |
| G0:007154cellular r  | 30  | -0.500205 | -1.619181 | 0.0238095 | 0.1304533 | 0.1042526 |
| G0:199074cellular c  | 102 | -0.343113 | -1.480043 | 0.0238095 | 0.1304533 | 0.1042526 |
| G0:007208stem cell   | 109 | 0.4308547 | 1.3476031 | 0.0238837 | 0.1304853 | 0.1042782 |
| G0:0001957intramembr | 6   | 0.7862581 | 1.4652705 | 0.0239044 | 0.1304853 | 0.1042782 |
| G0:003607direct oss  | 6   | 0.7862581 | 1.4652705 | 0.0239044 | 0.1304853 | 0.1042782 |
| G0:004208T-helper 1  | 42  | 0.5092695 | 1.4181467 | 0.0239726 | 0.1304853 | 0.1042782 |
| G0:0023014signal tra | 892 | 0.3390071 | 1.1546223 | 0.023976  | 0.1304853 | 0.1042782 |
| G0:000177microglial  | 41  | 0.5148229 | 1.4321123 | 0.024     | 0.1304853 | 0.1042782 |
| G0:000226leukocyte   | 41  | 0.5148229 | 1.4321123 | 0.024     | 0.1304853 | 0.1042782 |
| G0:007190positive r  | 314 | 0.3743425 | 1.2468008 | 0.024     | 0.1304853 | 0.1042782 |
| G0:001491regulator   | 58  | 0.4790746 | 1.4053034 | 0.0240175 | 0.1304853 | 0.1042782 |

|           |             |     |           |           |           |           |           |
|-----------|-------------|-----|-----------|-----------|-----------|-----------|-----------|
| G0:007005 | intrinsic   | 58  | 0.4796169 | 1.4068942 | 0.0240175 | 0.1304853 | 0.1042782 |
| G0:004566 | positive r  | 348 | 0.3731307 | 1.2443317 | 0.024024  | 0.1304853 | 0.1042782 |
| G0:190571 | positive r  | 60  | 0.4798837 | 1.416812  | 0.0240437 | 0.1304853 | 0.1042782 |
| G0:000684 | tricarboxy  | 6   | -0.822871 | -1.777774 | 0.0240964 | 0.1304853 | 0.1042782 |
| G0:000974 | response t  | 6   | -0.811497 | -1.753201 | 0.0240964 | 0.1304853 | 0.1042782 |
| G0:001574 | citrate tr  | 6   | -0.822871 | -1.777774 | 0.0240964 | 0.1304853 | 0.1042782 |
| G0:001594 | formate me  | 6   | -0.826457 | -1.78552  | 0.0240964 | 0.1304853 | 0.1042782 |
| G0:003428 | response t  | 6   | -0.811497 | -1.753201 | 0.0240964 | 0.1304853 | 0.1042782 |
| G0:005100 | negative r  | 6   | -0.838775 | -1.812132 | 0.0240964 | 0.1304853 | 0.1042782 |
| G0:000700 | plasma men  | 95  | 0.4365667 | 1.3495924 | 0.024109  | 0.1304853 | 0.1042782 |
| G0:003264 | regulator   | 95  | 0.4360412 | 1.3479681 | 0.024109  | 0.1304853 | 0.1042782 |
| G0:190274 | apoptotic   | 33  | 0.5355928 | 1.4510269 | 0.0241935 | 0.1308631 | 0.1045801 |
| G0:000646 | negative r  | 211 | 0.3907492 | 1.2844666 | 0.024218  | 0.1309155 | 0.104622  |
| G0:000975 | response t  | 8   | -0.739578 | -1.697831 | 0.0242718 | 0.1309677 | 0.1046637 |
| G0:005171 | cytolysis   | 8   | -0.743311 | -1.706401 | 0.0242718 | 0.1309677 | 0.1046637 |
| G0:007253 | purine-cor  | 8   | -0.732876 | -1.682447 | 0.0242718 | 0.1309677 | 0.1046637 |
| G0:001405 | negative r  | 5   | 0.8160918 | 1.472856  | 0.0243572 | 0.1312083 | 0.104856  |
| G0:190121 | positive r  | 91  | 0.4404121 | 1.3523759 | 0.0243644 | 0.1312083 | 0.104856  |
| G0:004684 | bone remod  | 88  | 0.4405133 | 1.34813   | 0.0243902 | 0.1312083 | 0.104856  |
| G0:006033 | type I int  | 88  | 0.4403256 | 1.3475557 | 0.0243902 | 0.1312083 | 0.104856  |
| G0:007135 | cellular r  | 88  | 0.4403256 | 1.3475557 | 0.0243902 | 0.1312083 | 0.104856  |
| G0:005117 | import int  | 154 | 0.408975  | 1.3147028 | 0.0244151 | 0.1312623 | 0.1048992 |
| G0:003552 | proline tr  | 7   | 0.7629212 | 1.4727508 | 0.024453  | 0.1313076 | 0.1049353 |
| G0:199000 | inhibitor   | 7   | 0.7618233 | 1.4706314 | 0.024453  | 0.1313076 | 0.1049353 |
| G0:000238 | immunoglob  | 52  | 0.494519  | 1.4198779 | 0.0244716 | 0.1313282 | 0.1049518 |
| G0:004514 | homologous  | 50  | 0.4938025 | 1.4093182 | 0.0245536 | 0.1316089 | 0.1051761 |
| G0:006109 | positive r  | 50  | 0.4937214 | 1.4090865 | 0.0245536 | 0.1316089 | 0.1051761 |
| G0:003519 | gene siler  | 120 | 0.4216869 | 1.3375902 | 0.0245902 | 0.1317256 | 0.1052694 |
| G0:000233 | mature B c  | 25  | 0.5707074 | 1.4680871 | 0.0246769 | 0.1321103 | 0.1055769 |
| G0:190018 | regulator   | 114 | 0.4261155 | 1.3437239 | 0.0247423 | 0.1323557 | 0.105773  |
| G0:001405 | gamma-amir  | 9   | -0.710304 | -1.688907 | 0.0247525 | 0.1323557 | 0.105773  |
| G0:003556 | regulator   | 22  | 0.5785446 | 1.4534325 | 0.0247934 | 0.1324152 | 0.1058205 |
| G0:005085 | positive r  | 22  | 0.5814656 | 1.4607706 | 0.0247934 | 0.1324152 | 0.1058205 |
| G0:000628 | nucleotide  | 102 | 0.4305176 | 1.3402902 | 0.025     | 0.1334384 | 0.1066382 |
| G0:003021 | erythrocyt  | 105 | 0.4304264 | 1.3413037 | 0.0250784 | 0.1337144 | 0.1068587 |
| G0:000602 | aminoglyca  | 64  | 0.4692721 | 1.3902392 | 0.0250818 | 0.1337144 | 0.1068587 |
| G0:005086 | negative r  | 30  | 0.5509436 | 1.4739027 | 0.0251142 | 0.1338067 | 0.1069325 |
| G0:003166 | lipopolysa  | 57  | 0.4764693 | 1.3914697 | 0.0252193 | 0.1342863 | 0.1073158 |
| G0:000721 | Notch sigr  | 181 | 0.401016  | 1.3019537 | 0.0252781 | 0.1344937 | 0.1074815 |
| G0:003261 | interleuki  | 56  | 0.4807256 | 1.3997036 | 0.0253025 | 0.1344937 | 0.1074815 |
| G0:199013 | neuron pro  | 162 | 0.4073567 | 1.3147478 | 0.0253036 | 0.1344937 | 0.1074815 |
| G0:190227 | regulator   | 165 | 0.4048263 | 1.3065841 | 0.0253293 | 0.1345495 | 0.1075261 |
| G0:000752 | myoblast f  | 37  | 0.5226928 | 1.4326756 | 0.0253749 | 0.1346617 | 0.1076158 |
| G0:002191 | neural tu   | 157 | 0.4097009 | 1.3205939 | 0.0253807 | 0.1346617 | 0.1076158 |
| G0:000611 | regulator   | 43  | -0.467746 | -1.659152 | 0.0254237 | 0.1348095 | 0.1077339 |
| G0:004641 | urate meta  | 12  | -0.625464 | -1.654535 | 0.025641  | 0.1357188 | 0.1084605 |
| G0:006033 | interferon  | 85  | 0.4458974 | 1.3602154 | 0.025641  | 0.1357188 | 0.1084605 |
| G0:199009 | cellular r  | 48  | 0.5004296 | 1.4246145 | 0.025641  | 0.1357188 | 0.1084605 |
| G0:190379 | regulator   | 7   | 0.7563411 | 1.4600484 | 0.02574   | 0.1361617 | 0.1088145 |
| G0:004650 | CS-adenosyl | 16  | -0.609357 | -1.776586 | 0.0257732 | 0.136256  | 0.1088899 |
| G0:004690 | regulator   | 68  | 0.4662515 | 1.3981511 | 0.0258342 | 0.1364975 | 0.1090829 |

|           |             |     |           |           |           |           |           |
|-----------|-------------|-----|-----------|-----------|-----------|-----------|-----------|
| G0:003248 | Rab protei  | 67  | 0.4645057 | 1.3909519 | 0.0259179 | 0.1368584 | 0.1093713 |
| G0:190216 | regulator   | 17  | 0.6199451 | 1.455216  | 0.0260223 | 0.1373279 | 0.1097465 |
| G0:005077 | negative r  | 66  | 0.4645072 | 1.3838384 | 0.0260586 | 0.137438  | 0.1098345 |
| G0:000706 | mitotic si  | 21  | 0.5936191 | 1.4716242 | 0.0260973 | 0.1374786 | 0.109867  |
| G0:004303 | positive r  | 21  | 0.5951314 | 1.4753733 | 0.0260973 | 0.1374786 | 0.109867  |
| G0:000672 | terpenoid   | 108 | -0.628394 | -2.748539 | 0.0263158 | 0.1385476 | 0.1107213 |
| G0:003191 | positive r  | 11  | 0.7066151 | 1.5168827 | 0.0263488 | 0.1386393 | 0.1107946 |
| G0:003566 | TRIF-deper  | 28  | 0.5502529 | 1.4526503 | 0.0264064 | 0.1387782 | 0.1109055 |
| G0:200040 | positive r  | 28  | 0.5485195 | 1.448074  | 0.0264064 | 0.1387782 | 0.1109055 |
| G0:000600 | fructose n  | 15  | -0.593359 | -1.675841 | 0.026455  | 0.1388073 | 0.1109288 |
| G0:003073 | sequesteri  | 15  | -0.561114 | -1.584771 | 0.026455  | 0.1388073 | 0.1109288 |
| G0:000308 | regulator   | 25  | -0.458415 | -1.501655 | 0.0264901 | 0.1388073 | 0.1109288 |
| G0:000676 | folic acid  | 25  | -0.4578   | -1.49964  | 0.0264901 | 0.1388073 | 0.1109288 |
| G0:009881 | neurotrans  | 26  | -0.451742 | -1.493726 | 0.0264901 | 0.1388073 | 0.1109288 |
| G0:004554 | negative r  | 5   | -0.824869 | -1.678717 | 0.026616  | 0.1392208 | 0.1112592 |
| G0:009020 | negative r  | 5   | -0.824869 | -1.678717 | 0.026616  | 0.1392208 | 0.1112592 |
| G0:010611 | negative r  | 5   | -0.824869 | -1.678717 | 0.026616  | 0.1392208 | 0.1112592 |
| G0:001033 | response t  | 53  | 0.4845633 | 1.3962322 | 0.0266963 | 0.1394769 | 0.1114639 |
| G0:004311 | receptor c  | 53  | 0.4843093 | 1.3955004 | 0.0266963 | 0.1394769 | 0.1114639 |
| G0:001081 | T cell che  | 26  | 0.5612797 | 1.4526389 | 0.027027  | 0.1411217 | 0.1127784 |
| G0:001973 | antimicrob  | 103 | 0.4280939 | 1.3336061 | 0.0271116 | 0.1414801 | 0.1130647 |
| G0:009030 | nucleic ac  | 267 | 0.3743096 | 1.2366309 | 0.0271357 | 0.1415228 | 0.1130989 |
| G0:003261 | interleuki  | 98  | 0.4319658 | 1.3412429 | 0.0271682 | 0.1416041 | 0.1131639 |
| G0:006004 | regulator   | 16  | 0.6216439 | 1.4438317 | 0.0272277 | 0.1416041 | 0.1131639 |
| G0:200036 | regulator   | 16  | 0.6202853 | 1.4406763 | 0.0272277 | 0.1416041 | 0.1131639 |
| G0:000961 | response t  | 204 | 0.3912143 | 1.2842361 | 0.0272452 | 0.1416041 | 0.1131639 |
| G0:006021 | camera-tyr  | 17  | 0.6186797 | 1.4522458 | 0.0272615 | 0.1416041 | 0.1131639 |
| G0:009002 | positive r  | 17  | 0.6192077 | 1.4534851 | 0.0272615 | 0.1416041 | 0.1131639 |
| G0:001490 | smooth mus  | 64  | 0.4652779 | 1.3784062 | 0.0272628 | 0.1416041 | 0.1131639 |
| G0:001081 | negative r  | 60  | 0.4734033 | 1.3976793 | 0.0273224 | 0.1418307 | 0.113345  |
| G0:004557 | regulator   | 28  | 0.5482843 | 1.4474531 | 0.0275545 | 0.1428727 | 0.1141777 |
| G0:000628 | base-excise | 39  | 0.5141262 | 1.4235464 | 0.0275862 | 0.1428727 | 0.1141777 |
| G0:001714 | stem cell   | 39  | 0.5160137 | 1.4287727 | 0.0275862 | 0.1428727 | 0.1141777 |
| G0:007025 | mucus secr  | 11  | 0.7027629 | 1.5086131 | 0.0276035 | 0.1428727 | 0.1141777 |
| G0:190594 | positive r  | 11  | 0.7047795 | 1.5129421 | 0.0276035 | 0.1428727 | 0.1141777 |
| G0:004254 | response t  | 133 | 0.4118135 | 1.3137697 | 0.0276639 | 0.1431021 | 0.114361  |
| G0:200040 | positive r  | 34  | 0.5287318 | 1.435322  | 0.0277136 | 0.1432757 | 0.1144998 |
| G0:009038 | phagosome   | 27  | 0.5543182 | 1.4517581 | 0.0277778 | 0.1435239 | 0.1146981 |
| G0:003149 | chromatin   | 19  | 0.6024769 | 1.450557  | 0.0281863 | 0.1455499 | 0.1163172 |
| G0:003542 | autocrine   | 7   | 0.7517671 | 1.4512187 | 0.028314  | 0.1460399 | 0.1167088 |
| G0:003577 | interleuki  | 7   | 0.7524769 | 1.4525889 | 0.028314  | 0.1460399 | 0.1167088 |
| G0:003579 | positive r  | 58  | 0.4739676 | 1.3903227 | 0.0283843 | 0.14613   | 0.1167808 |
| G0:004679 | transport   | 58  | 0.4751117 | 1.3936789 | 0.0283843 | 0.14613   | 0.1167808 |
| G0:003032 | transepith  | 5   | 0.8088086 | 1.4597114 | 0.0284168 | 0.14613   | 0.1167808 |
| G0:009066 | scaRNA loc  | 5   | 0.8059759 | 1.4545991 | 0.0284168 | 0.14613   | 0.1167808 |
| G0:190116 | negative r  | 5   | 0.8090792 | 1.4601999 | 0.0284168 | 0.14613   | 0.1167808 |
| G0:000618 | GTP biosyn  | 10  | 0.7213509 | 1.5165843 | 0.0284302 | 0.14613   | 0.1167808 |
| G0:009732 | plasma men  | 21  | 0.5884305 | 1.4587613 | 0.0284698 | 0.1461645 | 0.1168083 |
| G0:190307 | negative r  | 21  | 0.5900818 | 1.4628549 | 0.0284698 | 0.1461645 | 0.1168083 |
| G0:006067 | branching   | 12  | 0.6731073 | 1.4774753 | 0.0285006 | 0.1462385 | 0.1168674 |
| G0:007123 | cellular r  | 135 | 0.4093757 | 1.3093779 | 0.0285714 | 0.1465033 | 0.1170791 |

|           |             |     |           |           |           |           |           |
|-----------|-------------|-----|-----------|-----------|-----------|-----------|-----------|
| G0:003133 | negative r  | 127 | 0.4136595 | 1.3182275 | 0.0286006 | 0.1465033 | 0.1170791 |
| G0:003434 | (response t | 91  | 0.4349222 | 1.3355179 | 0.0286017 | 0.1465033 | 0.1170791 |
| G0:007573 | intracellu  | 55  | 0.4785245 | 1.3889248 | 0.0287929 | 0.1473978 | 0.1177939 |
| G0:007261 | interleuki  | 11  | 0.6986375 | 1.4997572 | 0.0288582 | 0.1476471 | 0.1179932 |
| G0:004210 | cytokine n  | 112 | 0.4236344 | 1.3321348 | 0.0288958 | 0.1477541 | 0.1180787 |
| G0:000685 | drug trans  | 79  | -0.327236 | -1.315837 | 0.0289855 | 0.1480316 | 0.1183004 |
| G0:190595 | positive r  | 79  | -0.331325 | -1.332279 | 0.0289855 | 0.1480316 | 0.1183004 |
| G0:003214 | activation  | 321 | 0.3717668 | 1.2378439 | 0.029     | 0.1480316 | 0.1183004 |
| G0:003152 | ruffle org  | 49  | 0.4919481 | 1.4029951 | 0.0290503 | 0.1482031 | 0.1184375 |
| G0:004805 | (post-embry | 6   | 0.7792484 | 1.4522072 | 0.0292165 | 0.1489654 | 0.1190467 |
| G0:007231 | glomerular  | 18  | 0.6038917 | 1.4408131 | 0.029304  | 0.1493262 | 0.119335  |
| G0:006066 | embryonic   | 25  | 0.5627743 | 1.4476798 | 0.0293772 | 0.1494467 | 0.1194314 |
| G0:000680 | xenobiotic  | 111 | -0.72516  | -3.164441 | 0.0294118 | 0.1494467 | 0.1194314 |
| G0:004321 | myelin mai  | 14  | 0.6294982 | 1.4323384 | 0.0294118 | 0.1494467 | 0.1194314 |
| G0:007061 | regulator   | 111 | -0.438574 | -1.913843 | 0.0294118 | 0.1494467 | 0.1194314 |
| G0:190383 | (magnesium  | 14  | 0.6293325 | 1.4319615 | 0.0294118 | 0.1494467 | 0.1194314 |
| G0:006135 | neural pre  | 141 | 0.4101201 | 1.3130583 | 0.0294715 | 0.1496145 | 0.1195655 |
| G0:004277 | intrinsic   | 44  | 0.5047028 | 1.4157677 | 0.0294785 | 0.1496145 | 0.1195655 |
| G0:006041 | (response t | 37  | -0.437063 | -1.526684 | 0.0296296 | 0.1502581 | 0.1200798 |
| G0:007201 | (glomerular | 21  | 0.5848489 | 1.4498821 | 0.029656  | 0.1502581 | 0.1200798 |
| G0:190466 | regulator   | 21  | 0.5876769 | 1.456893  | 0.029656  | 0.1502581 | 0.1200798 |
| G0:000250 | peptide ar  | 5   | 0.8048196 | 1.4525122 | 0.02977   | 0.1506638 | 0.120404  |
| G0:003551 | (protein K2 | 5   | 0.7990451 | 1.4420905 | 0.02977   | 0.1506638 | 0.120404  |
| G0:003265 | regulator   | 86  | 0.4405617 | 1.3460016 | 0.0298507 | 0.1509867 | 0.120662  |
| G0:190211 | (positive r | 54  | 0.4772645 | 1.3813586 | 0.0299667 | 0.1514177 | 0.1210064 |
| G0:000740 | axonogenes  | 454 | 0.3584512 | 1.2040848 | 0.02997   | 0.1514177 | 0.1210064 |
| G0:004586 | positive r  | 333 | 0.3696217 | 1.2320287 | 0.03      | 0.1514625 | 0.1210422 |
| G0:000743 | salivary g  | 34  | 0.5260144 | 1.4279451 | 0.0300231 | 0.1514625 | 0.1210422 |
| G0:000720 | positive r  | 303 | 0.3711181 | 1.2348739 | 0.03003   | 0.1514625 | 0.1210422 |
| G0:001644 | somatic re  | 48  | 0.4956773 | 1.4110858 | 0.0301003 | 0.1514696 | 0.121048  |
| G0:190256 | regulator   | 11  | 0.6970066 | 1.4962562 | 0.0301129 | 0.1514696 | 0.121048  |
| G0:000830 | associativ  | 75  | 0.4472885 | 1.3513637 | 0.0301399 | 0.1514696 | 0.121048  |
| G0:003263 | interleuki  | 75  | 0.4470996 | 1.350793  | 0.0301399 | 0.1514696 | 0.121048  |
| G0:000005 | ribosomal   | 8   | 0.7344182 | 1.4654171 | 0.0301508 | 0.1514696 | 0.121048  |
| G0:004867 | negative r  | 8   | 0.7361486 | 1.4688698 | 0.0301508 | 0.1514696 | 0.121048  |
| G0:200064 | positive r  | 8   | 0.7336086 | 1.4638017 | 0.0301508 | 0.1514696 | 0.121048  |
| G0:001921 | regulator   | 112 | -0.433707 | -1.89059  | 0.030303  | 0.1518055 | 0.1213164 |
| G0:003363 | (positive r | 20  | 0.5924666 | 1.4500526 | 0.030303  | 0.1518055 | 0.1213164 |
| G0:004560 | (positive r | 20  | 0.5890272 | 1.4416348 | 0.030303  | 0.1518055 | 0.1213164 |
| G0:006116 | establishm  | 20  | 0.5911812 | 1.4469067 | 0.030303  | 0.1518055 | 0.1213164 |
| G0:190113 | carbohydr   | 182 | 0.3984788 | 1.2939516 | 0.030303  | 0.1518055 | 0.1213164 |
| G0:004231 | vasodilati  | 28  | -0.484039 | -1.573973 | 0.0305344 | 0.1527958 | 0.1221078 |
| G0:005122 | (cytoplasm  | 24  | 0.5732553 | 1.4613725 | 0.0305523 | 0.1527958 | 0.1221078 |
| G0:007162 | positive r  | 25  | 0.5613986 | 1.444141  | 0.0305523 | 0.1527958 | 0.1221078 |
| G0:000602 | glycosamir  | 60  | 0.4671281 | 1.3791522 | 0.0306011 | 0.1529538 | 0.1222341 |
| G0:000908 | glutamine   | 17  | -0.566481 | -1.685898 | 0.0307692 | 0.153449  | 0.1226298 |
| G0:001086 | positive r  | 12  | -0.617269 | -1.632858 | 0.0307692 | 0.153449  | 0.1226298 |
| G0:001088 | regulator   | 12  | -0.614903 | -1.626598 | 0.0307692 | 0.153449  | 0.1226298 |
| G0:005269 | cellular g  | 12  | -0.599334 | -1.585414 | 0.0307692 | 0.153449  | 0.1226298 |
| G0:004568 | positive r  | 41  | 0.5046116 | 1.403707  | 0.0308571 | 0.1538011 | 0.1229112 |
| G0:200102 | positive r  | 86  | 0.4401578 | 1.3447675 | 0.0309168 | 0.1539808 | 0.1230548 |

|                      |     |           |           |           |           |           |
|----------------------|-----|-----------|-----------|-----------|-----------|-----------|
| GO:0002756MyD88-ind  | 32  | 0.5318757 | 1.4386377 | 0.0309278 | 0.1539808 | 0.1230548 |
| GO:001605vesicle or  | 307 | 0.3704841 | 1.233329  | 0.031031  | 0.154408  | 0.1233962 |
| GO:000211aggressive  | 7   | -0.749771 | -1.695281 | 0.0311111 | 0.1546931 | 0.1236241 |
| GO:0009211pyrimidine | 5   | 0.7982246 | 1.4406097 | 0.0311231 | 0.1546931 | 0.1236241 |
| GO:000663acylglycer  | 117 | -0.619946 | -2.699194 | 0.03125   | 0.1548905 | 0.1237818 |
| GO:003475cellular h  | 117 | -0.586344 | -2.55289  | 0.03125   | 0.1548905 | 0.1237818 |
| GO:0050911detection  | 113 | -0.543528 | -2.379656 | 0.03125   | 0.1548905 | 0.1237818 |
| GO:009875detoxifica  | 117 | -0.437061 | -1.902927 | 0.03125   | 0.1548905 | 0.1237818 |
| GO:190331regulator   | 113 | -0.43833  | -1.919081 | 0.03125   | 0.1548905 | 0.1237818 |
| GO:004563regulator   | 209 | 0.3862564 | 1.2682006 | 0.0313448 | 0.1552738 | 0.1240881 |
| GO:0032071regulator  | 8   | 0.7293045 | 1.4552135 | 0.031407  | 0.1554954 | 0.1242652 |
| GO:009878lncRNA trar | 97  | 0.4290413 | 1.3288257 | 0.0314465 | 0.1555426 | 0.1243029 |
| GO:005087brown fat   | 41  | -0.450916 | -1.583277 | 0.0314961 | 0.1555426 | 0.1243029 |
| GO:007087regulator   | 31  | -0.511561 | -1.682382 | 0.0314961 | 0.1555426 | 0.1243029 |
| GO:0009451RNA modifi | 151 | 0.4072366 | 1.3089779 | 0.0315041 | 0.1555426 | 0.1243029 |
| GO:001648cytosolic   | 142 | 0.4066705 | 1.3026692 | 0.0315041 | 0.1555426 | 0.1243029 |
| GO:0002931response t | 46  | 0.4994716 | 1.4100621 | 0.0316742 | 0.1562958 | 0.1249048 |
| GO:0016114terpenoid  | 15  | -0.555334 | -1.568445 | 0.031746  | 0.1564764 | 0.1250492 |
| GO:003585epithelial  | 44  | 0.5031813 | 1.4114998 | 0.031746  | 0.1564764 | 0.1250492 |
| GO:004663alpha-beta  | 31  | 0.5348772 | 1.4395174 | 0.032     | 0.1574286 | 0.1258101 |
| GO:004208cytokine h  | 111 | 0.4211659 | 1.3227654 | 0.0320248 | 0.1574286 | 0.1258101 |
| GO:000991epidermal   | 286 | 0.3706461 | 1.2297591 | 0.0320963 | 0.1574286 | 0.1258101 |
| GO:000027peptidogly  | 6   | -0.797126 | -1.722153 | 0.0321285 | 0.1574286 | 0.1258101 |
| GO:000925peptidogly  | 6   | -0.797126 | -1.722153 | 0.0321285 | 0.1574286 | 0.1258101 |
| GO:001579glycerol t  | 6   | -0.773509 | -1.67113  | 0.0321285 | 0.1574286 | 0.1258101 |
| GO:004568regulator   | 79  | 0.4432461 | 1.3469088 | 0.0321543 | 0.1574286 | 0.1258101 |
| GO:0060964regulator  | 79  | 0.4439444 | 1.3490306 | 0.0321543 | 0.1574286 | 0.1258101 |
| GO:200054negative r  | 7   | 0.7501149 | 1.4480292 | 0.032175  | 0.1574286 | 0.1258101 |
| GO:005507potassium   | 29  | 0.5397008 | 1.433024  | 0.0321839 | 0.1574286 | 0.1258101 |
| GO:190332negative r  | 80  | 0.439458  | 1.3366507 | 0.0321888 | 0.1574286 | 0.1258101 |
| GO:0060391positive r | 12  | 0.66748   | 1.4651233 | 0.0322181 | 0.1574286 | 0.1258101 |
| GO:000910coenzyme c  | 14  | -0.621849 | -1.69355  | 0.0322581 | 0.1574286 | 0.1258101 |
| GO:000911(vitamin bi | 23  | -0.492895 | -1.584285 | 0.0322581 | 0.1574286 | 0.1258101 |
| GO:003085positive r  | 53  | 0.4779129 | 1.3770697 | 0.0322581 | 0.1574286 | 0.1258101 |
| GO:003237positive r  | 22  | -0.51935  | -1.641092 | 0.0322581 | 0.1574286 | 0.1258101 |
| GO:003237positive r  | 22  | -0.51935  | -1.641092 | 0.0322581 | 0.1574286 | 0.1258101 |
| GO:007146cellular r  | 23  | -0.468982 | -1.507426 | 0.0322581 | 0.1574286 | 0.1258101 |
| GO:003254mitochondr  | 132 | 0.4098642 | 1.3073035 | 0.0327198 | 0.1595945 | 0.127541  |
| GO:009887vesicle-me  | 87  | 0.4374003 | 1.3386923 | 0.0328738 | 0.1602576 | 0.1280709 |
| GO:1901741positive r | 18  | 0.6011864 | 1.4343585 | 0.032967  | 0.1606239 | 0.1283637 |
| GO:0030641regulator  | 86  | 0.4373741 | 1.3362628 | 0.033049  | 0.1609352 | 0.1286125 |
| GO:003598chondrocyt  | 13  | 0.6453471 | 1.4434457 | 0.0330882 | 0.1610314 | 0.1286893 |
| GO:0032607interferor | 30  | 0.5403966 | 1.4456871 | 0.033105  | 0.1610314 | 0.1286893 |
| GO:2000008regulator  | 38  | 0.5108705 | 1.4120347 | 0.0331429 | 0.1611254 | 0.1287645 |
| GO:0002761regulator  | 110 | 0.4195537 | 1.3154261 | 0.0331606 | 0.1611254 | 0.1287645 |
| GO:190352regulator   | 6   | 0.7759585 | 1.4460762 | 0.0332005 | 0.1612312 | 0.128849  |
| GO:003265regulator   | 54  | 0.4718596 | 1.3657152 | 0.0332963 | 0.1614586 | 0.1290307 |
| GO:003272positive r  | 54  | 0.4721461 | 1.3665443 | 0.0332963 | 0.1614586 | 0.1290307 |
| GO:0090504epiboly    | 29  | 0.5379926 | 1.4284883 | 0.0333333 | 0.1614586 | 0.1290307 |
| GO:009063activation  | 84  | 0.4397792 | 1.3359623 | 0.0333692 | 0.1614586 | 0.1290307 |
| GO:190390negative r  | 75  | 0.4446293 | 1.3433295 | 0.0333692 | 0.1614586 | 0.1290307 |



|                     |     |           |           |           |           |           |
|---------------------|-----|-----------|-----------|-----------|-----------|-----------|
| G0:003294secretion  | 35  | 0.5190677 | 1.4144452 | 0.0333717 | 0.1614586 | 0.1290307 |
| G0:200066regulation | 10  | 0.7078566 | 1.4882136 | 0.0333745 | 0.1614586 | 0.1290307 |
| G0:000703vacuole or | 155 | 0.4023779 | 1.2944059 | 0.0335707 | 0.1623193 | 0.1297185 |
| G0:200009positive r | 9   | 0.7224027 | 1.4802358 | 0.03375   | 0.1630975 | 0.1303404 |
| G0:003519posttransc | 129 | 0.4121622 | 1.3118644 | 0.0337769 | 0.1631386 | 0.1303733 |
| G0:000652regulation | 60  | 0.4651161 | 1.373212  | 0.0338798 | 0.1635468 | 0.1306995 |
| G0:004226natural ki | 56  | 0.4709178 | 1.3711469 | 0.0341034 | 0.164415  | 0.1313933 |
| G0:190268mitochondr | 56  | 0.4723489 | 1.3753136 | 0.0341034 | 0.164415  | 0.1313933 |
| G0:007238organelle  | 82  | 0.4333756 | 1.3196863 | 0.0341151 | 0.164415  | 0.1313933 |
| G0:000685carnitine  | 11  | -0.622297 | -1.587871 | 0.0341463 | 0.1644762 | 0.1314422 |
| G0:001591plasma men | 5   | -0.811956 | -1.652437 | 0.0342205 | 0.1647414 | 0.1316542 |
| G0:000240dendritic  | 23  | 0.5727674 | 1.4463937 | 0.0342385 | 0.1647414 | 0.1316542 |
| G0:004351regulation | 31  | 0.5308977 | 1.4288075 | 0.0342857 | 0.1648794 | 0.1317645 |
| G0:009706dendritic  | 19  | 0.5945151 | 1.4313877 | 0.0343137 | 0.1649249 | 0.1318008 |
| G0:006040cytosolic  | 161 | 0.3981091 | 1.2848599 | 0.034413  | 0.165048  | 0.1318992 |
| G0:200009regulation | 15  | 0.6184771 | 1.4211879 | 0.0344403 | 0.165048  | 0.1318992 |
| G0:000663neutral li | 118 | -0.618175 | -2.676563 | 0.0344828 | 0.165048  | 0.1318992 |
| G0:004671acid secre | 118 | -0.341152 | -1.477115 | 0.0344828 | 0.165048  | 0.1318992 |
| G0:009031positive r | 150 | 0.4062905 | 1.3061715 | 0.0345178 | 0.165048  | 0.1318992 |
| G0:000272positive r | 51  | 0.4810166 | 1.3753429 | 0.0345212 | 0.165048  | 0.1318992 |
| G0:199008response t | 51  | 0.4801504 | 1.3728662 | 0.0345212 | 0.165048  | 0.1318992 |
| G0:000806Toll signa | 6   | 0.7646432 | 1.4249889 | 0.0345286 | 0.165048  | 0.1318992 |
| G0:003814macrophage | 6   | 0.7697814 | 1.4345645 | 0.0345286 | 0.165048  | 0.1318992 |
| G0:006140positive r | 6   | 0.7733581 | 1.44123   | 0.0345286 | 0.165048  | 0.1318992 |
| G0:003265regulation | 74  | 0.4477844 | 1.3515352 | 0.0345572 | 0.165048  | 0.1318992 |
| G0:001623telomere c | 36  | 0.5171173 | 1.4136313 | 0.0345622 | 0.165048  | 0.1318992 |
| G0:001071positive r | 47  | 0.4954342 | 1.4066533 | 0.0346369 | 0.165227  | 0.1320422 |
| G0:007067response t | 47  | 0.4948873 | 1.4051004 | 0.0346369 | 0.165227  | 0.1320422 |
| G0:000697hyperosmot | 27  | 0.5442284 | 1.4253328 | 0.0347222 | 0.1655453 | 0.1322966 |
| G0:004500double-str | 7   | 0.7470341 | 1.4420821 | 0.034749  | 0.1655843 | 0.1323278 |
| G0:007121cellular r | 315 | 0.3677361 | 1.2247654 | 0.035     | 0.1666015 | 0.1331407 |
| G0:010400cellular r | 315 | 0.3677361 | 1.2247654 | 0.035     | 0.1666015 | 0.1331407 |
| G0:003247negative r | 8   | 0.7252089 | 1.4470414 | 0.0351759 | 0.1672595 | 0.1336666 |
| G0:004810autophagic | 8   | 0.7268556 | 1.450327  | 0.0351759 | 0.1672595 | 0.1336666 |
| G0:000269regulation | 26  | 0.5510671 | 1.4262079 | 0.0352526 | 0.1675349 | 0.1338866 |
| G0:003139positive r | 107 | 0.4215799 | 1.315266  | 0.035343  | 0.1678079 | 0.1341048 |
| G0:000833histone mf | 22  | 0.5719693 | 1.4369139 | 0.0354191 | 0.1678079 | 0.1341048 |
| G0:000922nucleotide | 22  | 0.5725972 | 1.4384913 | 0.0354191 | 0.1678079 | 0.1341048 |
| G0:005144positive r | 22  | 0.5723761 | 1.4379359 | 0.0354191 | 0.1678079 | 0.1341048 |
| G0:004400modificati | 40  | 0.4995069 | 1.3873469 | 0.0354286 | 0.1678079 | 0.1341048 |
| G0:009009negative r | 169 | 0.3996737 | 1.2924196 | 0.035461  | 0.1678079 | 0.1341048 |
| G0:000288regulation | 54  | 0.4711093 | 1.3635436 | 0.0355161 | 0.1678079 | 0.1341048 |
| G0:004565positive r | 14  | 0.6236248 | 1.4189744 | 0.0355392 | 0.1678079 | 0.1341048 |
| G0:007023positive r | 14  | 0.6268994 | 1.4264253 | 0.0355392 | 0.1678079 | 0.1341048 |
| G0:004310amino acid | 7   | -0.748852 | -1.693204 | 0.0355556 | 0.1678079 | 0.1341048 |
| G0:007126L-methioni | 7   | -0.748852 | -1.693204 | 0.0355556 | 0.1678079 | 0.1341048 |
| G0:007126L-methioni | 7   | -0.748852 | -1.693204 | 0.0355556 | 0.1678079 | 0.1341048 |
| G0:200019negative r | 7   | -0.740581 | -1.674501 | 0.0355556 | 0.1678079 | 0.1341048 |
| G0:004507negative r | 51  | 0.4786018 | 1.3684383 | 0.0356347 | 0.1680923 | 0.1343321 |
| G0:190397regulation | 15  | 0.6159237 | 1.4153206 | 0.0356704 | 0.1681711 | 0.134395  |
| G0:004303regulation | 49  | 0.4832325 | 1.3781389 | 0.0357542 | 0.1683937 | 0.134573  |

|           |            |     |           |           |           |           |           |
|-----------|------------|-----|-----------|-----------|-----------|-----------|-----------|
| G0:004302 | T cell hom | 37  | 0.5103942 | 1.3989657 | 0.0357555 | 0.1683937 | 0.134573  |
| G0:001098 | regulator  | 17  | -0.534212 | -1.589861 | 0.0358974 | 0.1689727 | 0.1350357 |
| G0:000024 | spliceosom | 58  | 0.4628705 | 1.3577709 | 0.0360262 | 0.1693994 | 0.1353767 |
| G0:190210 | regulator  | 58  | 0.4626669 | 1.3571736 | 0.0360262 | 0.1693994 | 0.1353767 |
| G0:000020 | protein pc | 294 | 0.3680023 | 1.2215993 | 0.0360721 | 0.1694361 | 0.135406  |
| G0:003109 | stress-act | 291 | 0.3700609 | 1.2287791 | 0.0360721 | 0.1694361 | 0.135406  |
| G0:003432 | cell junct | 237 | 0.3769752 | 1.2425001 | 0.0362538 | 0.1701993 | 0.1360159 |
| G0:000920 | deoxyribor | 8   | 0.724115  | 1.4448587 | 0.0364322 | 0.1709465 | 0.136613  |
| G0:003410 | homotypic  | 80  | 0.4359257 | 1.3259066 | 0.0364807 | 0.1710237 | 0.1366748 |
| G0:001083 | positive r | 30  | 0.5263567 | 1.408127  | 0.0365297 | 0.1710237 | 0.1366748 |
| G0:004519 | establishm | 42  | 0.4959509 | 1.3810586 | 0.0365297 | 0.1710237 | 0.1366748 |
| G0:004213 | meiotic DN | 5   | 0.7941501 | 1.4332563 | 0.0365359 | 0.1710237 | 0.1366748 |
| G0:000636 | transcript | 55  | 0.4673038 | 1.3563565 | 0.0365449 | 0.1710237 | 0.1366748 |
| G0:199082 | response t | 95  | 0.4241987 | 1.3113583 | 0.0366876 | 0.1713309 | 0.1369202 |
| G0:199083 | cellular r | 95  | 0.4241987 | 1.3113583 | 0.0366876 | 0.1713309 | 0.1369202 |
| G0:000276 | positive r | 52  | 0.4771824 | 1.3701006 | 0.0367075 | 0.1713309 | 0.1369202 |
| G0:009734 | mitochondr | 52  | 0.4779883 | 1.3724145 | 0.0367075 | 0.1713309 | 0.1369202 |
| G0:003267 | regulator  | 67  | 0.4543132 | 1.3604307 | 0.0367171 | 0.1713309 | 0.1369202 |
| G0:003014 | sphingolip | 28  | 0.5377086 | 1.4195335 | 0.0367394 | 0.1713309 | 0.1369202 |
| G0:003300 | positive r | 14  | 0.6211327 | 1.4133039 | 0.0367647 | 0.1713309 | 0.1369202 |
| G0:004330 | positive r | 14  | 0.6211327 | 1.4133039 | 0.0367647 | 0.1713309 | 0.1369202 |
| G0:000636 | terminatic | 35  | 0.5158968 | 1.4058047 | 0.0368239 | 0.1714271 | 0.1369971 |
| G0:003273 | positive r | 35  | 0.5138646 | 1.4002669 | 0.0368239 | 0.1714271 | 0.1369971 |
| G0:004867 | response t | 70  | 0.4507622 | 1.3540172 | 0.0368764 | 0.1715812 | 0.1371203 |
| G0:000931 | response t | 419 | 0.3601076 | 1.2079406 | 0.036963  | 0.1717892 | 0.1372865 |
| G0:000989 | regulator  | 927 | 0.3328907 | 1.1351056 | 0.036963  | 0.1717892 | 0.1372865 |
| G0:000257 | platelet c | 123 | -0.366232 | -1.614583 | 0.037037  | 0.1717892 | 0.1372865 |
| G0:000758 | digestion  | 128 | -0.322348 | -1.4633   | 0.037037  | 0.1717892 | 0.1372865 |
| G0:007232 | monocarbox | 128 | -0.767642 | -3.484717 | 0.037037  | 0.1717892 | 0.1372865 |
| G0:190547 | negative r | 27  | 0.537498  | 1.407706  | 0.037037  | 0.1717892 | 0.1372865 |
| G0:004396 | histone H4 | 65  | 0.4559645 | 1.3527929 | 0.0371179 | 0.1720745 | 0.1375145 |
| G0:004341 | macromolec | 272 | 0.371132  | 1.2268745 | 0.0371486 | 0.172127  | 0.1375564 |
| G0:005195 | regulator  | 33  | -0.48922  | -1.659575 | 0.0373134 | 0.1728007 | 0.1380948 |
| G0:005070 | regulator  | 188 | 0.3923419 | 1.2777109 | 0.0373737 | 0.1729896 | 0.1382458 |
| G0:003261 | interleuki | 85  | 0.4317815 | 1.3171545 | 0.0373932 | 0.1729896 | 0.1382458 |
| G0:000614 | purine nuc | 19  | -0.534261 | -1.635915 | 0.0376344 | 0.1740151 | 0.1390653 |
| G0:004247 | odontogene | 126 | 0.4075857 | 1.2989039 | 0.0377551 | 0.1744791 | 0.1394362 |
| G0:200005 | regulator  | 23  | 0.567597  | 1.433337  | 0.0377804 | 0.1744791 | 0.1394362 |
| G0:001644 | posttransc | 130 | 0.4081511 | 1.3007251 | 0.0377937 | 0.1744791 | 0.1394362 |
| G0:001072 | negative r | 315 | 0.3652234 | 1.2163967 | 0.038     | 0.1753406 | 0.1401246 |
| G0:004665 | tetrahydra | 18  | -0.55585  | -1.651028 | 0.0382514 | 0.1763441 | 0.1409266 |
| G0:003114 | SCF-depend | 90  | 0.4269894 | 1.3095694 | 0.0382572 | 0.1763441 | 0.1409266 |
| G0:003435 | regulator  | 10  | 0.7011156 | 1.4740411 | 0.0383189 | 0.1765372 | 0.1410808 |
| G0:004511 | protein ne | 16  | 0.6095808 | 1.4158139 | 0.0383663 | 0.1766641 | 0.1411823 |
| G0:004273 | drug catak | 133 | -0.630567 | -2.874831 | 0.0384615 | 0.1769191 | 0.1413861 |
| G0:190237 | negative r | 46  | 0.4930583 | 1.3919568 | 0.0384615 | 0.1769191 | 0.1413861 |
| G0:007217 | metanephri | 6   | 0.7630093 | 1.4219441 | 0.0385126 | 0.1770624 | 0.1415006 |
| G0:005119 | negative r | 22  | -0.475088 | -1.501227 | 0.0387097 | 0.1778764 | 0.1421511 |
| G0:000622 | UTP biosyr | 9   | 0.7108286 | 1.4565198 | 0.03875   | 0.1779696 | 0.1422256 |
| G0:003301 | tetrapyrro | 53  | -0.36997  | -1.410152 | 0.038835  | 0.1779911 | 0.1422427 |
| G0:003026 | entry into | 132 | 0.4050321 | 1.2918911 | 0.0388548 | 0.1779911 | 0.1422427 |

|           |             |     |           |           |           |           |           |
|-----------|-------------|-----|-----------|-----------|-----------|-----------|-----------|
| G0:004440 | entry into  | 132 | 0.4050321 | 1.2918911 | 0.0388548 | 0.1779911 | 0.1422427 |
| G0:005180 | entry into  | 132 | 0.4050321 | 1.2918911 | 0.0388548 | 0.1779911 | 0.1422427 |
| G0:005182 | entry into  | 132 | 0.4050321 | 1.2918911 | 0.0388548 | 0.1779911 | 0.1422427 |
| G0:001904 | viral late  | 11  | 0.6877207 | 1.4763223 | 0.0388959 | 0.1780425 | 0.1422838 |
| G0:190236 | negative r  | 52  | 0.47483   | 1.3633463 | 0.0389321 | 0.1780425 | 0.1422838 |
| G0:002187 | forebrain   | 8   | 0.7224405 | 1.4415175 | 0.0389447 | 0.1780425 | 0.1422838 |
| G0:000629 | mismatch r  | 32  | 0.5222068 | 1.4124849 | 0.0389462 | 0.1780425 | 0.1422838 |
| G0:000696 | cellular c  | 51  | 0.47741   | 1.3650306 | 0.0389755 | 0.178085  | 0.1423178 |
| G0:003808 | peptidyl-t  | 37  | 0.5045521 | 1.3829527 | 0.0392157 | 0.1788376 | 0.1429193 |
| G0:000202 | reduction   | 5   | 0.7912501 | 1.4280225 | 0.0392422 | 0.1788376 | 0.1429193 |
| G0:000656 | proline bi  | 5   | 0.7929527 | 1.4310952 | 0.0392422 | 0.1788376 | 0.1429193 |
| G0:005512 | L-proline   | 5   | 0.7929527 | 1.4310952 | 0.0392422 | 0.1788376 | 0.1429193 |
| G0:190362 | positive r  | 5   | 0.7918426 | 1.4290918 | 0.0392422 | 0.1788376 | 0.1429193 |
| G0:003328 | response t  | 34  | 0.5164621 | 1.4020139 | 0.039261  | 0.1788376 | 0.1429193 |
| G0:004255 | pteridine-  | 31  | -0.453017 | -1.489848 | 0.0393701 | 0.179151  | 0.1431697 |
| G0:007154 | response t  | 40  | -0.437219 | -1.523138 | 0.0393701 | 0.179151  | 0.1431697 |
| G0:190102 | regulator   | 43  | 0.4943904 | 1.3842128 | 0.0395928 | 0.1798469 | 0.1437259 |
| G0:000914 | nucleoside  | 158 | 0.3987526 | 1.285296  | 0.0395939 | 0.1798469 | 0.1437259 |
| G0:001585 | nucleobase  | 9   | -0.686177 | -1.631539 | 0.039604  | 0.1798469 | 0.1437259 |
| G0:004649 | S-adenosyl  | 9   | -0.682751 | -1.623393 | 0.039604  | 0.1798469 | 0.1437259 |
| G0:000854 | fibroblast  | 104 | 0.4201733 | 1.3102863 | 0.0396246 | 0.1798488 | 0.1437273 |
| G0:003631 | response t  | 30  | -0.451719 | -1.462229 | 0.0396825 | 0.1800198 | 0.143864  |
| G0:000669 | leukotrier  | 26  | -0.439902 | -1.454576 | 0.0397351 | 0.1800744 | 0.1439076 |
| G0:000821 | glucocorti  | 25  | -0.435795 | -1.427557 | 0.0397351 | 0.1800744 | 0.1439076 |
| G0:006071 | labyrinthi  | 45  | 0.4922027 | 1.3828676 | 0.039818  | 0.1803551 | 0.144132  |
| G0:190223 | negative r  | 30  | 0.5227839 | 1.398569  | 0.0399543 | 0.1803551 | 0.144132  |
| G0:003132 | regulator   | 820 | 0.3345356 | 1.1366755 | 0.03996   | 0.1803551 | 0.144132  |
| G0:000906 | cellular e  | 121 | -0.758353 | -3.304728 | 0.04      | 0.1803551 | 0.144132  |
| G0:003232 | molybdopte  | 7   | -0.734481 | -1.660709 | 0.04      | 0.1803551 | 0.144132  |
| G0:004354 | molybdopte  | 7   | -0.734481 | -1.660709 | 0.04      | 0.1803551 | 0.144132  |
| G0:005118 | prosthetic  | 7   | -0.734481 | -1.660709 | 0.04      | 0.1803551 | 0.144132  |
| G0:005508 | lipid home  | 129 | -0.534755 | -2.433004 | 0.04      | 0.1803551 | 0.144132  |
| G0:190382 | organic ac  | 129 | -0.317966 | -1.446664 | 0.04      | 0.1803551 | 0.144132  |
| G0:190503 | carboxylic  | 129 | -0.317966 | -1.446664 | 0.04      | 0.1803551 | 0.144132  |
| G0:003051 | regulator   | 94  | 0.4234573 | 1.3061054 | 0.0400844 | 0.180644  | 0.1443629 |
| G0:000274 | negative r  | 6   | -0.766989 | -1.657042 | 0.0401606 | 0.180725  | 0.1444276 |
| G0:001405 | regulator   | 6   | -0.757471 | -1.636481 | 0.0401606 | 0.180725  | 0.1444276 |
| G0:005129 | centrosome  | 66  | 0.4544107 | 1.3537595 | 0.0401737 | 0.180725  | 0.1444276 |
| G0:003129 | replicatio  | 28  | 0.5341749 | 1.4102047 | 0.0401837 | 0.180725  | 0.1444276 |
| G0:003111 | negative r  | 35  | 0.5095919 | 1.388624  | 0.0402762 | 0.1809838 | 0.1446344 |
| G0:000664 | membrane l  | 195 | 0.3855569 | 1.2620545 | 0.040282  | 0.1809838 | 0.1446344 |
| G0:000047 | maturation  | 21  | 0.5765751 | 1.4293709 | 0.0403321 | 0.1810262 | 0.1446683 |
| G0:003246 | endoplasmic | 21  | 0.575918  | 1.427742  | 0.0403321 | 0.1810262 | 0.1446683 |
| G0:005073 | positive r  | 183 | 0.394702  | 1.2828257 | 0.0403633 | 0.1810744 | 0.1447068 |
| G0:009715 | mesenchyme  | 13  | 0.6398173 | 1.4310773 | 0.0404412 | 0.1813324 | 0.144913  |
| G0:000673 | NADH reger  | 27  | 0.535164  | 1.4015933 | 0.0405093 | 0.1813631 | 0.1449375 |
| G0:006162 | canonical   | 27  | 0.535164  | 1.4015933 | 0.0405093 | 0.1813631 | 0.1449375 |
| G0:006171 | glucose ca  | 27  | 0.535164  | 1.4015933 | 0.0405093 | 0.1813631 | 0.1449375 |
| G0:006076 | negative r  | 15  | 0.6125413 | 1.4075482 | 0.0405904 | 0.1816349 | 0.1451548 |
| G0:004203 | regulator   | 102 | 0.4197837 | 1.3068735 | 0.040625  | 0.1816982 | 0.1452053 |
| G0:009866 | inorganic   | 106 | 0.4170069 | 1.2995995 | 0.0406674 | 0.1817962 | 0.1452836 |

|                      |     |           |           |           |           |           |
|----------------------|-----|-----------|-----------|-----------|-----------|-----------|
| G0:0035307positive r | 43  | 0.4932303 | 1.3809649 | 0.040724  | 0.1819578 | 0.1454128 |
| G0:0043506regulator  | 80  | 0.4325544 | 1.3156526 | 0.0407725 | 0.1820832 | 0.145513  |
| G0:0002286T cell act | 99  | 0.4226554 | 1.3120348 | 0.0408377 | 0.1822826 | 0.1456723 |
| G0:0042366vitamin D  | 12  | -0.591245 | -1.564016 | 0.0410256 | 0.1829377 | 0.1461959 |
| G0:1902606proton tra | 128 | 0.4076903 | 1.2975809 | 0.0410256 | 0.1829377 | 0.1461959 |
| G0:0034336cell junct | 283 | 0.3673474 | 1.2178634 | 0.0411234 | 0.1831847 | 0.1463932 |
| G0:1903956regulator  | 26  | 0.5455959 | 1.4120479 | 0.0411281 | 0.1831847 | 0.1463932 |
| G0:0071526semaphorin | 40  | 0.4936665 | 1.3711257 | 0.0411429 | 0.1831847 | 0.1463932 |
| G0:0045746negative r | 39  | 0.4992438 | 1.382339  | 0.0413793 | 0.1841452 | 0.1471609 |
| G0:0002676respirator | 11  | 0.6801426 | 1.4600544 | 0.0414053 | 0.1841685 | 0.1471795 |
| G0:0072531pyrimidine | 10  | -0.661014 | -1.611022 | 0.0414508 | 0.1842155 | 0.147217  |
| G0:0048566post-embry | 8   | 0.7203135 | 1.4372734 | 0.0414573 | 0.1842155 | 0.147217  |
| G0:0001886liver deve | 132 | -0.304154 | -1.382603 | 0.0416667 | 0.1849609 | 0.1478127 |
| G0:0002544chronic ir | 19  | 0.5866367 | 1.4124191 | 0.0416667 | 0.1849609 | 0.1478127 |
| G0:0046822regulator  | 104 | 0.4164477 | 1.2986682 | 0.0417101 | 0.1850613 | 0.147893  |
| G0:0032911negative r | 5   | 0.7855634 | 1.4177592 | 0.0419486 | 0.1857903 | 0.1484756 |
| G0:0090306spindle as | 5   | 0.7886286 | 1.4232912 | 0.0419486 | 0.1857903 | 0.1484756 |
| G0:1905671regulator  | 5   | 0.7848945 | 1.416552  | 0.0419486 | 0.1857903 | 0.1484756 |
| G0:0043006chordate c | 601 | 0.3434264 | 1.1629447 | 0.041958  | 0.1857903 | 0.1484756 |
| G0:0051056regulator  | 321 | 0.3655974 | 1.2173021 | 0.042     | 0.1858835 | 0.14855   |
| G0:0061616glycolytic | 28  | 0.5326947 | 1.4062972 | 0.0424799 | 0.1875807 | 0.1499063 |
| G0:0061626glycolytic | 28  | 0.5326947 | 1.4062972 | 0.0424799 | 0.1875807 | 0.1499063 |
| G0:0010356regulator  | 9   | 0.707617  | 1.4499391 | 0.0425    | 0.1875807 | 0.1499063 |
| G0:1904667negative r | 9   | 0.705883  | 1.4463862 | 0.0425    | 0.1875807 | 0.1499063 |
| G0:0032092positive r | 89  | 0.4278296 | 1.3091772 | 0.042508  | 0.1875807 | 0.1499063 |
| G0:0048771tissue ren | 161 | 0.3951823 | 1.275414  | 0.0425101 | 0.1875807 | 0.1499063 |
| G0:0110116positive r | 78  | 0.432898  | 1.3157498 | 0.0427807 | 0.1886811 | 0.1507858 |
| G0:0034637cellular c | 80  | -0.343598 | -1.38601  | 0.0428571 | 0.1888363 | 0.1509098 |
| G0:0002316mature B c | 19  | 0.5849831 | 1.408438  | 0.0428922 | 0.1888363 | 0.1509098 |
| G0:0034136toll-like  | 19  | 0.5847365 | 1.4078443 | 0.0428922 | 0.1888363 | 0.1509098 |
| G0:0044344cellular r | 131 | 0.403384  | 1.2868781 | 0.0429009 | 0.1888363 | 0.1509098 |
| G0:0001837epithelial | 132 | 0.403245  | 1.2861909 | 0.0429448 | 0.1889358 | 0.1509893 |
| G0:0009411response t | 133 | 0.4030243 | 1.2857303 | 0.0430328 | 0.1892293 | 0.1512238 |
| G0:0045187regulator  | 17  | 0.6006501 | 1.4099245 | 0.0433705 | 0.1900597 | 0.1518874 |
| G0:0010676regulator  | 131 | -0.39397  | -1.767925 | 0.0434783 | 0.1900597 | 0.1518874 |
| G0:0033866nucleoside | 130 | -0.512093 | -2.32322  | 0.0434783 | 0.1900597 | 0.1518874 |
| G0:0033876ribonuclec | 130 | -0.512093 | -2.32322  | 0.0434783 | 0.1900597 | 0.1518874 |
| G0:0034036purine nuc | 130 | -0.512093 | -2.32322  | 0.0434783 | 0.1900597 | 0.1518874 |
| G0:0035296regulator  | 134 | -0.303357 | -1.385858 | 0.0434783 | 0.1900597 | 0.1518874 |
| G0:0042157lipoprotei | 125 | -0.317634 | -1.392572 | 0.0434783 | 0.1900597 | 0.1518874 |
| G0:0046686response t | 127 | -0.356842 | -1.569422 | 0.0434783 | 0.1900597 | 0.1518874 |
| G0:0050886regulator  | 134 | -0.303357 | -1.385858 | 0.0434783 | 0.1900597 | 0.1518874 |
| G0:0061041regulator  | 134 | -0.383355 | -1.751319 | 0.0434783 | 0.1900597 | 0.1518874 |
| G0:0097746regulator  | 134 | -0.303357 | -1.385858 | 0.0434783 | 0.1900597 | 0.1518874 |
| G0:1905952regulator  | 130 | -0.361436 | -1.639733 | 0.0434783 | 0.1900597 | 0.1518874 |
| G0:1905266negative r | 47  | 0.4837051 | 1.3733517 | 0.0435754 | 0.1901629 | 0.1519699 |
| G0:0006664glycolipic | 107 | 0.4124964 | 1.286927  | 0.043659  | 0.1901629 | 0.1519699 |
| G0:0010766regulator  | 29  | 0.5299378 | 1.407101  | 0.0436782 | 0.1901629 | 0.1519699 |
| G0:0001996regulator  | 8   | -0.702289 | -1.612228 | 0.0436893 | 0.1901629 | 0.1519699 |
| G0:0006107oxaloaceta | 8   | -0.67461  | -1.548686 | 0.0436893 | 0.1901629 | 0.1519699 |
| G0:0015736sialic aci | 8   | -0.702946 | -1.613736 | 0.0436893 | 0.1901629 | 0.1519699 |

|                        |     |           |           |           |           |           |
|------------------------|-----|-----------|-----------|-----------|-----------|-----------|
| GO:1901035positive r   | 8   | -0.695647 | -1.596981 | 0.0436893 | 0.1901629 | 0.1519699 |
| GO:0009206purine rik   | 142 | 0.4017657 | 1.2869578 | 0.0436992 | 0.1901629 | 0.1519699 |
| GO:0001991regulator    | 18  | -0.540409 | -1.605163 | 0.0437158 | 0.1901629 | 0.1519699 |
| GO:1902884positive r   | 18  | -0.518151 | -1.53905  | 0.0437158 | 0.1901629 | 0.1519699 |
| GO:0061635regulator    | 9   | 0.7014745 | 1.4373529 | 0.04375   | 0.190171  | 0.1519764 |
| GO:0000147actin cort   | 6   | 0.7585603 | 1.4136529 | 0.0438247 | 0.190171  | 0.1519764 |
| GO:0002326B cell lir   | 6   | 0.7603878 | 1.4170586 | 0.0438247 | 0.190171  | 0.1519764 |
| GO:0044396actin cort   | 6   | 0.7585603 | 1.4136529 | 0.0438247 | 0.190171  | 0.1519764 |
| GO:1903986positive r   | 6   | 0.7596618 | 1.4157057 | 0.0438247 | 0.190171  | 0.1519764 |
| GO:0040008regulator    | 632 | 0.3410204 | 1.1552602 | 0.043956  | 0.1905548 | 0.1522831 |
| GO:1902532negative r   | 480 | 0.3492253 | 1.1754836 | 0.043956  | 0.1905548 | 0.1522831 |
| GO:0042535positive r   | 19  | 0.5843204 | 1.4068425 | 0.0441176 | 0.1911621 | 0.1527685 |
| GO:0071918urea trans   | 6   | -0.745982 | -1.611659 | 0.0441767 | 0.1912316 | 0.152824  |
| GO:1901374acetate es   | 6   | -0.751489 | -1.623555 | 0.0441767 | 0.1912316 | 0.152824  |
| GO:0090502RNA phosph   | 67  | 0.4507997 | 1.3499094 | 0.0442765 | 0.19157   | 0.1530945 |
| GO:0009812flavonoid    | 7   | -0.723575 | -1.636049 | 0.0444444 | 0.1921098 | 0.1535258 |
| GO:0010896positive r   | 7   | -0.724755 | -1.638717 | 0.0444444 | 0.1921098 | 0.1535258 |
| GO:0031397negative r   | 70  | 0.4442917 | 1.3345809 | 0.0444685 | 0.1921181 | 0.1535325 |
| GO:2000574regulator    | 10  | 0.6917946 | 1.4544445 | 0.0444994 | 0.1921181 | 0.1535325 |
| GO:0010824regulator    | 42  | 0.4913637 | 1.3682849 | 0.0445205 | 0.1921181 | 0.1535325 |
| GO:0009642response t   | 9   | -0.646299 | -1.53672  | 0.0445545 | 0.1921181 | 0.1535325 |
| GO:0051006positive r   | 9   | -0.639909 | -1.521526 | 0.0445545 | 0.1921181 | 0.1535325 |
| GO:0001704formation    | 109 | 0.412304  | 1.2895811 | 0.0446521 | 0.1922715 | 0.1536551 |
| GO:1902416mitotic cy   | 24  | 0.5537712 | 1.4117028 | 0.0446533 | 0.1922715 | 0.1536551 |
| GO:1904956regulator    | 5   | 0.7832869 | 1.4136507 | 0.0446549 | 0.1922715 | 0.1536551 |
| GO:0050866negative r   | 20  | 0.5769629 | 1.4121077 | 0.0448485 | 0.1930114 | 0.1542463 |
| GO:0042096interleuki   | 9   | 0.6992663 | 1.4328282 | 0.045     | 0.1934761 | 0.1546177 |
| GO:0045075regulator    | 9   | 0.6992663 | 1.4328282 | 0.045     | 0.1934761 | 0.1546177 |
| GO:1902455negative r   | 7   | 0.7362114 | 1.4211899 | 0.045045  | 0.1935761 | 0.1546976 |
| GO:0023035CD40 signa   | 8   | 0.7135315 | 1.4237409 | 0.0452261 | 0.1942603 | 0.1552444 |
| GO:0006098pentose-ph   | 14  | 0.6135261 | 1.3959962 | 0.0453431 | 0.1943023 | 0.155278  |
| GO:0010248establishm   | 14  | 0.6126712 | 1.3940509 | 0.0453431 | 0.1943023 | 0.155278  |
| GO:0090177establishm   | 14  | 0.6124789 | 1.3936133 | 0.0453431 | 0.1943023 | 0.155278  |
| GO:0006726isoprenoic   | 126 | -0.589919 | -2.586911 | 0.0454545 | 0.1943023 | 0.155278  |
| GO:0006766vitamin me   | 126 | -0.402776 | -1.766253 | 0.0454545 | 0.1943023 | 0.155278  |
| GO:0032355response t   | 126 | -0.264717 | -1.160836 | 0.0454545 | 0.1943023 | 0.155278  |
| GO:0035156regulator    | 135 | -0.30329  | -1.390951 | 0.0454545 | 0.1943023 | 0.155278  |
| GO:0044058regulator    | 39  | -0.43026  | -1.51235  | 0.0454545 | 0.1943023 | 0.155278  |
| GO:0046688response t   | 39  | -0.435959 | -1.532384 | 0.0454545 | 0.1943023 | 0.155278  |
| GO:0061008hepaticobi   | 135 | -0.300961 | -1.380273 | 0.0454545 | 0.1943023 | 0.155278  |
| GO:0007032endosome c   | 72  | 0.4402288 | 1.3250532 | 0.0455038 | 0.194331  | 0.1553009 |
| GO:0061005cell differe | 54  | 0.464305  | 1.3438496 | 0.045505  | 0.194331  | 0.1553009 |
| GO:0009201ribonucleic  | 148 | 0.3995999 | 1.2844283 | 0.0455466 | 0.1944151 | 0.1553681 |
| GO:1903038negative r   | 110 | 0.4109333 | 1.2883986 | 0.0455959 | 0.1945321 | 0.1554616 |
| GO:0016572histone ac   | 150 | 0.3981116 | 1.2798776 | 0.0456853 | 0.1948201 | 0.1556918 |
| GO:0045846positive r   | 50  | 0.4780848 | 1.3644595 | 0.0457589 | 0.1950406 | 0.155868  |
| GO:0070231T cell apc   | 47  | 0.4830228 | 1.3714144 | 0.0458101 | 0.195143  | 0.1559498 |
| GO:0051156glucose 6-ph | 24  | 0.5505586 | 1.4035131 | 0.0458284 | 0.195143  | 0.1559498 |
| GO:0016075rRNA catab   | 17  | 0.596106  | 1.3992579 | 0.0458488 | 0.195143  | 0.1559498 |
| GO:0051222positive r   | 399 | 0.3563728 | 1.194254  | 0.045954  | 0.1954972 | 0.1562329 |
| GO:0043062extracellu   | 409 | 0.3541708 | 1.1873649 | 0.046     | 0.19554   | 0.1562671 |

|                     |     |           |           |           |           |           |
|---------------------|-----|-----------|-----------|-----------|-----------|-----------|
| G0:004393ossificati | 5   | 0.7807234 | 1.4090242 | 0.0460081 | 0.19554   | 0.1562671 |
| G0:001049proteasome | 22  | 0.5646958 | 1.4186414 | 0.0460449 | 0.1956026 | 0.1563171 |
| G0:003414toll-like  | 33  | 0.5110291 | 1.3844791 | 0.0460829 | 0.1956709 | 0.1563717 |
| G0:000258regulator  | 6   | 0.7548607 | 1.4067583 | 0.0464807 | 0.1972657 | 0.1576462 |
| G0:001933phenol-cor | 10  | -0.657251 | -1.601851 | 0.0466321 | 0.1978137 | 0.1580841 |
| G0:005085positive r | 40  | 0.4906036 | 1.3626188 | 0.0468571 | 0.1985596 | 0.1586803 |
| G0:005144positive r | 31  | 0.5126389 | 1.3796674 | 0.0468571 | 0.1985596 | 0.1586803 |
| G0:005081regulator  | 86  | -0.336685 | -1.381492 | 0.046875  | 0.1985596 | 0.1586803 |
| G0:000222natural ki | 60  | 0.4557784 | 1.3456435 | 0.0469945 | 0.1989711 | 0.1590091 |
| G0:190179negative r | 28  | 0.5259626 | 1.3885245 | 0.0470723 | 0.1992056 | 0.1591965 |
| G0:003464cellular r | 79  | 0.4296075 | 1.3054647 | 0.0471597 | 0.1994804 | 0.1594161 |
| G0:000195negative r | 36  | 0.4983876 | 1.3624305 | 0.047235  | 0.1995141 | 0.159443  |
| G0:000629nucleotide | 36  | 0.4982766 | 1.362127  | 0.047235  | 0.1995141 | 0.159443  |
| G0:000725activation | 36  | 0.4988264 | 1.3636301 | 0.047235  | 0.1995141 | 0.159443  |
| G0:007233intrinsic  | 75  | 0.4345096 | 1.3127556 | 0.0473628 | 0.1999586 | 0.1597982 |
| G0:001000glial cell | 210 | 0.3801989 | 1.2492146 | 0.0474747 | 0.2002526 | 0.1600332 |
| G0:000713meiosis II | 9   | 0.6967772 | 1.4277279 | 0.0475    | 0.2002526 | 0.1600332 |
| G0:006198meiosis II | 9   | 0.6967772 | 1.4277279 | 0.0475    | 0.2002526 | 0.1600332 |
| G0:004846cell matur | 165 | 0.3920914 | 1.2654817 | 0.047619  | 0.2006593 | 0.1603582 |
| G0:009712receptor l | 52  | 0.4659985 | 1.3379892 | 0.0478309 | 0.2014566 | 0.1609954 |
| G0:190201regulator  | 51  | 0.4721001 | 1.3498484 | 0.0478842 | 0.2015854 | 0.1610983 |
| G0:003272positive r | 30  | 0.5163    | 1.381223  | 0.0479452 | 0.2017467 | 0.1612272 |
| G0:003111positive r | 31  | 0.5104396 | 1.3737484 | 0.048     | 0.2018205 | 0.1612862 |
| G0:004663alpha-beta | 130 | 0.4030928 | 1.2846049 | 0.0480082 | 0.2018205 | 0.1612862 |
| G0:000072non-recomb | 65  | 0.4505817 | 1.3368228 | 0.0480349 | 0.2018376 | 0.1612998 |
| G0:003193regulator  | 24  | 0.5493457 | 1.400421  | 0.0481786 | 0.2021392 | 0.1615409 |
| G0:009715positive r | 6   | -0.743432 | -1.606149 | 0.0481928 | 0.2021392 | 0.1615409 |
| G0:009882modulator  | 6   | -0.743432 | -1.606149 | 0.0481928 | 0.2021392 | 0.1615409 |
| G0:005129protein he | 28  | 0.524483  | 1.3846185 | 0.0482204 | 0.2021392 | 0.1615409 |
| G0:200010positive r | 28  | 0.5231234 | 1.3810292 | 0.0482204 | 0.2021392 | 0.1615409 |
| G0:009049dopamine u | 14  | -0.567878 | -1.546565 | 0.0483871 | 0.2027422 | 0.1620228 |
| G0:007177response t | 138 | 0.398432  | 1.2761207 | 0.0487805 | 0.2041979 | 0.1631861 |
| G0:200005regulator  | 141 | 0.3998057 | 1.2800353 | 0.0487805 | 0.2041979 | 0.1631861 |
| G0:000157gangliosid | 18  | 0.5838184 | 1.3929205 | 0.04884   | 0.204351  | 0.1633085 |
| G0:000979embryo dev | 617 | 0.3406363 | 1.1538032 | 0.048951  | 0.204719  | 0.1636026 |
| G0:000668glycosphir | 64  | 0.4517028 | 1.3381893 | 0.0490731 | 0.2051328 | 0.1639332 |
| G0:006075regulator  | 6   | 0.752689  | 1.4027111 | 0.0491368 | 0.2052315 | 0.1640121 |
| G0:007153protein lc | 31  | 0.5081106 | 1.3674806 | 0.0491429 | 0.2052315 | 0.1640121 |
| G0:004541positive r | 15  | 0.6036169 | 1.3870409 | 0.0492005 | 0.2053757 | 0.1641273 |
| G0:004664regulator  | 28  | 0.5219678 | 1.3779785 | 0.0493685 | 0.2059804 | 0.1646106 |
| G0:004885formation  | 5   | -0.791892 | -1.611605 | 0.0494297 | 0.2060093 | 0.1646337 |
| G0:000293desmosome  | 10  | 0.6791955 | 1.4279558 | 0.0494438 | 0.2060093 | 0.1646337 |
| G0:003017negative r | 200 | 0.382604  | 1.2545885 | 0.049445  | 0.2060093 | 0.1646337 |
| G0:005086negative r | 182 | 0.3890112 | 1.2632081 | 0.0494949 | 0.2060204 | 0.1646426 |
| G0:004224establishm | 16  | 0.6019444 | 1.3980777 | 0.049505  | 0.2060204 | 0.1646426 |
| G0:000320cardiac ch | 12  | 0.6493837 | 1.4254019 | 0.0495663 | 0.2060204 | 0.1646426 |
| G0:004864negative r | 12  | 0.648835  | 1.4241973 | 0.0495663 | 0.2060204 | 0.1646426 |
| G0:007024thymocyte  | 17  | 0.5906254 | 1.386393  | 0.0495663 | 0.2060204 | 0.1646426 |
| G0:190364regulator  | 22  | 0.558004  | 1.4018301 | 0.0495868 | 0.2060204 | 0.1646426 |
| G0:000914purine nuc | 143 | 0.3985208 | 1.2780498 | 0.0496957 | 0.2063767 | 0.1649273 |
| G0:000662protein re | 9   | 0.6909253 | 1.4157372 | 0.05      | 0.2071349 | 0.1655333 |

|           |             |     |           |           |           |           |           |
|-----------|-------------|-----|-----------|-----------|-----------|-----------|-----------|
| G0:004427 | cellular c  | 44  | -0.423925 | -1.528711 | 0.05      | 0.2071349 | 0.1655333 |
| G0:004574 | positive r  | 9   | 0.6905729 | 1.415015  | 0.05      | 0.2071349 | 0.1655333 |
| G0:199031 | cellular r  | 9   | 0.6906087 | 1.4150884 | 0.05      | 0.2071349 | 0.1655333 |
| G0:200010 | regulator   | 9   | 0.6914606 | 1.4168338 | 0.05      | 0.2071349 | 0.1655333 |
| G0:000013 | Golgi memb  | 694 | 0.3943994 | 1.334615  | 0.000999  | 0.0136872 | 0.010176  |
| G0:000022 | nuclear ch  | 522 | 0.4637951 | 1.5583334 | 0.000999  | 0.0136872 | 0.010176  |
| G0:000032 | lytic vacu  | 647 | 0.432286  | 1.4609996 | 0.000999  | 0.0136872 | 0.010176  |
| G0:000078 | chromatin   | 457 | 0.4186568 | 1.4023008 | 0.000999  | 0.0136872 | 0.010176  |
| G0:000569 | chromosome  | 935 | 0.4636541 | 1.5797279 | 0.000999  | 0.0136872 | 0.010176  |
| G0:000573 | nucleolus   | 874 | 0.4402603 | 1.4981758 | 0.000999  | 0.0136872 | 0.010176  |
| G0:000576 | lysosome    | 646 | 0.4324098 | 1.4613732 | 0.000999  | 0.0136872 | 0.010176  |
| G0:000576 | lysosomal   | 335 | 0.4532293 | 1.5040041 | 0.000999  | 0.0136872 | 0.010176  |
| G0:000577 | vacuole     | 731 | 0.4272239 | 1.4480994 | 0.000999  | 0.0136872 | 0.010176  |
| G0:000581 | centrosome  | 481 | 0.4575456 | 1.5339976 | 0.000999  | 0.0136872 | 0.010176  |
| G0:000581 | microtubul  | 688 | 0.4285388 | 1.4503127 | 0.000999  | 0.0136872 | 0.010176  |
| G0:000581 | spindle     | 329 | 0.5362948 | 1.7783763 | 0.000999  | 0.0136872 | 0.010176  |
| G0:000591 | adherens j  | 533 | 0.4453756 | 1.4972931 | 0.000999  | 0.0136872 | 0.010176  |
| G0:001000 | endosome n  | 448 | 0.4105504 | 1.3742784 | 0.000999  | 0.0136872 | 0.010176  |
| G0:001250 | vesicle me  | 754 | 0.4176441 | 1.4165264 | 0.000999  | 0.0136872 | 0.010176  |
| G0:001562 | actin cyto  | 481 | 0.4069294 | 1.3642986 | 0.000999  | 0.0136872 | 0.010176  |
| G0:001660 | nuclear bc  | 716 | 0.3812928 | 1.2915297 | 0.000999  | 0.0136872 | 0.010176  |
| G0:003013 | transport   | 373 | 0.4169472 | 1.3893752 | 0.000999  | 0.0136872 | 0.010176  |
| G0:003014 | secretory   | 799 | 0.3978522 | 1.3520382 | 0.000999  | 0.0136872 | 0.010176  |
| G0:003065 | cytoplasmic | 734 | 0.4144882 | 1.4048191 | 0.000999  | 0.0136872 | 0.010176  |
| G0:004442 | chromosome  | 818 | 0.4666317 | 1.5852302 | 0.000999  | 0.0136872 | 0.010176  |
| G0:004443 | Golgi appa  | 895 | 0.3858676 | 1.3133049 | 0.000999  | 0.0136872 | 0.010176  |
| G0:004443 | vacuolar p  | 532 | 0.4553026 | 1.5305065 | 0.000999  | 0.0136872 | 0.010176  |
| G0:004444 | endosomal   | 492 | 0.4091708 | 1.37304   | 0.000999  | 0.0136872 | 0.010176  |
| G0:004445 | nuclear ch  | 488 | 0.4557867 | 1.5294657 | 0.000999  | 0.0136872 | 0.010176  |
| G0:004847 | perinuclear | 674 | 0.4089539 | 1.384235  | 0.000999  | 0.0136872 | 0.010176  |
| G0:007016 | anchoring   | 549 | 0.4414937 | 1.4847063 | 0.000999  | 0.0136872 | 0.010176  |
| G0:009879 | Golgi subc  | 791 | 0.3970866 | 1.3493224 | 0.000999  | 0.0136872 | 0.010176  |
| G0:009885 | lytic vacu  | 336 | 0.4529792 | 1.5031886 | 0.000999  | 0.0136872 | 0.010176  |
| G0:009908 | supramolec  | 865 | 0.4334044 | 1.4747889 | 0.000999  | 0.0136872 | 0.010176  |
| G0:009908 | supramolec  | 864 | 0.4338437 | 1.4761222 | 0.000999  | 0.0136872 | 0.010176  |
| G0:009950 | secretory   | 944 | 0.3994918 | 1.361072  | 0.000999  | 0.0136872 | 0.010176  |
| G0:009951 | supramolec  | 857 | 0.4341186 | 1.4768915 | 0.000999  | 0.0136872 | 0.010176  |
| G0:009951 | polymeric   | 644 | 0.4645429 | 1.5697974 | 0.000999  | 0.0136872 | 0.010176  |
| G0:199090 | ribonucleo  | 830 | 0.4610462 | 1.5669051 | 0.000999  | 0.0136872 | 0.010176  |
| G0:000079 | nuclear ch  | 305 | 0.4114941 | 1.3606688 | 0.001     | 0.0136872 | 0.010176  |
| G0:000587 | microtubul  | 394 | 0.4716302 | 1.5723818 | 0.001     | 0.0136872 | 0.010176  |
| G0:000592 | cell-subst  | 399 | 0.4650916 | 1.5517959 | 0.001     | 0.0136872 | 0.010176  |
| G0:000592 | focal adhe  | 396 | 0.4651493 | 1.5516563 | 0.001     | 0.0136872 | 0.010176  |
| G0:003005 | cell-subst  | 403 | 0.4633481 | 1.5467257 | 0.001     | 0.0136872 | 0.010176  |
| G0:003066 | secretory   | 285 | 0.4420857 | 1.458815  | 0.001     | 0.0136872 | 0.010176  |
| G0:003125 | cell leadi  | 390 | 0.4417259 | 1.4730244 | 0.001     | 0.0136872 | 0.010176  |
| G0:009868 | chromosome  | 313 | 0.5377898 | 1.7796256 | 0.001     | 0.0136872 | 0.010176  |
| G0:000577 | vacuolar n  | 385 | 0.4505074 | 1.5007598 | 0.001001  | 0.0136872 | 0.010176  |
| G0:000584 | ribosome    | 223 | 0.4654183 | 1.5189851 | 0.001006  | 0.0136872 | 0.010176  |
| G0:004444 | cytosolic   | 231 | 0.4652137 | 1.5213413 | 0.0010081 | 0.0136872 | 0.010176  |
| G0:000079 | condensed   | 205 | 0.5742884 | 1.861809  | 0.0010111 | 0.0136872 | 0.010176  |

|                      |     |           |           |           |           |           |
|----------------------|-----|-----------|-----------|-----------|-----------|-----------|
| G0:0030027lamellipod | 188 | 0.456149  | 1.4740362 | 0.0010121 | 0.0136872 | 0.010176  |
| G0:000077chromosome  | 185 | 0.5714266 | 1.8460828 | 0.0010132 | 0.0136872 | 0.010176  |
| G0:000568spliceosome | 177 | 0.497132  | 1.6054783 | 0.0010132 | 0.0136872 | 0.010176  |
| G0:004439ribosomal   | 183 | 0.4884668 | 1.577014  | 0.0010142 | 0.0136872 | 0.010176  |
| G0:010100ficolin-1-  | 181 | 0.5020473 | 1.6210213 | 0.0010142 | 0.0136872 | 0.010176  |
| G0:000577vacuolar l  | 164 | 0.5024128 | 1.6170882 | 0.0010152 | 0.0136872 | 0.010176  |
| G0:000092spindle po  | 157 | 0.5589185 | 1.7933941 | 0.0010163 | 0.0136872 | 0.010176  |
| G0:000172ruffle      | 165 | 0.4902523 | 1.5778312 | 0.0010163 | 0.0136872 | 0.010176  |
| G0:003049midbody     | 162 | 0.5311219 | 1.7072652 | 0.0010163 | 0.0136872 | 0.010176  |
| G0:007082tertiary g  | 158 | 0.5217094 | 1.6748853 | 0.0010163 | 0.0136872 | 0.010176  |
| G0:000576primary ly  | 147 | 0.4986937 | 1.5948331 | 0.0010173 | 0.0136872 | 0.010176  |
| G0:000587microtubul  | 147 | 0.5075094 | 1.6230261 | 0.0010173 | 0.0136872 | 0.010176  |
| G0:004258azurophil   | 147 | 0.4986937 | 1.5948331 | 0.0010173 | 0.0136872 | 0.010176  |
| G0:000078chromosome  | 132 | 0.5004845 | 1.5843823 | 0.0010267 | 0.0136872 | 0.010176  |
| G0:004533phagocytic  | 127 | 0.495761  | 1.5660938 | 0.0010267 | 0.0136872 | 0.010176  |
| G0:000077kinetochor  | 128 | 0.5876057 | 1.8558967 | 0.0010277 | 0.0136872 | 0.010176  |
| G0:190481ficolin-1-  | 123 | 0.5035595 | 1.5837329 | 0.0010277 | 0.0136872 | 0.010176  |
| G0:001593large ribc  | 118 | 0.5125471 | 1.6063668 | 0.0010309 | 0.0136872 | 0.010176  |
| G0:000077condensed   | 111 | 0.6393145 | 1.9916608 | 0.0010331 | 0.0136872 | 0.010176  |
| G0:000588actin fila  | 108 | 0.4948569 | 1.5408255 | 0.0010331 | 0.0136872 | 0.010176  |
| G0:000077condensed   | 98  | 0.6313346 | 1.9434287 | 0.0010363 | 0.0136872 | 0.010176  |
| G0:000078nuclear ch  | 99  | 0.5177865 | 1.5937411 | 0.0010363 | 0.0136872 | 0.010176  |
| G0:003066Golgi-assc  | 104 | 0.489934  | 1.5167475 | 0.0010363 | 0.0136872 | 0.010176  |
| G0:004247melanosome  | 104 | 0.5286526 | 1.6366135 | 0.0010363 | 0.0136872 | 0.010176  |
| G0:004877pigment gr  | 104 | 0.5286526 | 1.6366135 | 0.0010363 | 0.0136872 | 0.010176  |
| G0:002262cytosolic   | 106 | 0.5142657 | 1.5943598 | 0.0010373 | 0.0136872 | 0.010176  |
| G0:007268mitotic sp  | 105 | 0.5501928 | 1.7044023 | 0.0010373 | 0.0136872 | 0.010176  |
| G0:004320lysosomal   | 92  | 0.5158979 | 1.5786258 | 0.0010406 | 0.0136872 | 0.010176  |
| G0:000079condensed   | 91  | 0.5720015 | 1.7447805 | 0.0010449 | 0.0136872 | 0.010176  |
| G0:000568U2-type sp  | 87  | 0.5287814 | 1.6078262 | 0.0010449 | 0.0136872 | 0.010176  |
| G0:003557azurophil   | 86  | 0.5324573 | 1.6158721 | 0.001046  | 0.0136872 | 0.010176  |
| G0:007101catalytic   | 83  | 0.5019626 | 1.5183896 | 0.0010526 | 0.0136872 | 0.010176  |
| G0:000558collagen t  | 84  | 0.4965627 | 1.5021722 | 0.0010537 | 0.0136872 | 0.010176  |
| G0:012011Sm-like pr  | 75  | 0.5415644 | 1.6199664 | 0.0010571 | 0.0136872 | 0.010176  |
| G0:007082tertiary g  | 70  | 0.5724937 | 1.6972324 | 0.0010638 | 0.0136872 | 0.010176  |
| G0:003053small nucl  | 64  | 0.5642184 | 1.6601394 | 0.0010672 | 0.0136872 | 0.010176  |
| G0:003068preribosom  | 72  | 0.5492289 | 1.6312458 | 0.0010672 | 0.0136872 | 0.010176  |
| G0:000565replicatio  | 66  | 0.5705023 | 1.6759536 | 0.0010787 | 0.0136872 | 0.010176  |
| G0:002262cytosolic   | 61  | 0.5730717 | 1.6693676 | 0.0010811 | 0.0136872 | 0.010176  |
| G0:009752spliceosome | 58  | 0.5749518 | 1.6639075 | 0.001087  | 0.0136872 | 0.010176  |
| G0:000587spindle mi  | 57  | 0.5842177 | 1.6847563 | 0.0010917 | 0.0136872 | 0.010176  |
| G0:004517intercellu  | 57  | 0.5571049 | 1.6065689 | 0.0010917 | 0.0136872 | 0.010176  |
| G0:000587kinesin cc  | 53  | 0.56628   | 1.6177392 | 0.0011086 | 0.0136872 | 0.010176  |
| G0:007100U2-type pr  | 50  | 0.5851707 | 1.6559583 | 0.0011173 | 0.0136872 | 0.010176  |
| G0:007101precatalyt  | 51  | 0.5868498 | 1.6608444 | 0.0011173 | 0.0136872 | 0.010176  |
| G0:000030cyclin-dep  | 40  | 0.6049936 | 1.6553746 | 0.0011299 | 0.013693  | 0.0101804 |
| G0:005123spindle mi  | 33  | 0.6288714 | 1.6680476 | 0.0011561 | 0.0138605 | 0.0103049 |
| G0:000078condensed   | 25  | 0.7417225 | 1.8633748 | 0.0011834 | 0.0138959 | 0.0103312 |
| G0:000077condensed   | 15  | 0.7816153 | 1.7689201 | 0.0012361 | 0.0138959 | 0.0103312 |
| G0:000094condensed   | 13  | 0.827699  | 1.838815  | 0.0012376 | 0.0138959 | 0.0103312 |
| G0:004302NADPH oxid  | 13  | 0.7624207 | 1.693793  | 0.0012376 | 0.0138959 | 0.0103312 |



|                      |     |           |           |           |           |           |
|----------------------|-----|-----------|-----------|-----------|-----------|-----------|
| GO:0042555MCM comple | 12  | 0.7868741 | 1.7238159 | 0.0012392 | 0.0138959 | 0.0103312 |
| GO:0045126pronucleus | 12  | 0.8006881 | 1.7540783 | 0.0012392 | 0.0138959 | 0.0103312 |
| GO:0042615MHC class  | 14  | 0.8050132 | 1.8016754 | 0.0012453 | 0.0138959 | 0.0103312 |
| GO:0032135chromosome | 5   | 0.964774  | 1.7342472 | 0.0013245 | 0.0146345 | 0.0108803 |
| GO:0005768endosome   | 846 | 0.3774221 | 1.2838069 | 0.001998  | 0.0216514 | 0.0160973 |
| GO:1990234transferas | 732 | 0.3732735 | 1.2651677 | 0.001998  | 0.0216514 | 0.0160973 |
| GO:0042581specific g | 155 | 0.4472304 | 1.4343522 | 0.0020284 | 0.0217715 | 0.0161865 |
| GO:0035575specific g | 88  | 0.4873803 | 1.4841942 | 0.0020899 | 0.0222196 | 0.0165197 |
| GO:0000792heterochro | 71  | 0.5281128 | 1.5643863 | 0.002139  | 0.0225299 | 0.0167504 |
| GO:0101005ficolin-1- | 58  | 0.5296946 | 1.5329333 | 0.0021739 | 0.0226852 | 0.0168658 |
| GO:0042788polysomal  | 31  | 0.6065689 | 1.5882178 | 0.0023256 | 0.0236618 | 0.0175919 |
| GO:0005726nuclear he | 30  | 0.6062281 | 1.5724266 | 0.0023392 | 0.0236618 | 0.0175919 |
| GO:0002102podosome   | 29  | 0.6295587 | 1.6175698 | 0.0023725 | 0.0236618 | 0.0175919 |
| GO:0046544U4/U6 x U5 | 29  | 0.6044589 | 1.553079  | 0.0023725 | 0.0236618 | 0.0175919 |
| GO:0097526spliceosom | 29  | 0.6044589 | 1.553079  | 0.0023725 | 0.0236618 | 0.0175919 |
| GO:0034395nuclear pe | 129 | 0.4675041 | 1.4786899 | 0.0030801 | 0.0304496 | 0.0226385 |
| GO:0034365intermedia | 5   | -0.961971 | -1.939595 | 0.0040486 | 0.0396398 | 0.0294712 |
| GO:0005795Golgi stac | 128 | 0.4542696 | 1.4347674 | 0.004111  | 0.0396398 | 0.0294712 |
| GO:0031902late endos | 122 | 0.4653098 | 1.4623657 | 0.0041152 | 0.0396398 | 0.0294712 |
| GO:0005844polysome   | 71  | 0.5029583 | 1.489873  | 0.0042781 | 0.0405159 | 0.0301225 |
| GO:0030676phagocytic | 71  | 0.5072246 | 1.5025108 | 0.0042781 | 0.0405159 | 0.0301225 |
| GO:0005575membrane a | 7   | -0.90973  | -2.018571 | 0.0044053 | 0.041373  | 0.0307597 |
| GO:0044426extracellu | 50  | 0.5450147 | 1.5423218 | 0.0044693 | 0.0416009 | 0.0309292 |
| GO:0000152nuclear ut | 41  | 0.5482725 | 1.5049145 | 0.0045403 | 0.0416009 | 0.0309292 |
| GO:0043596nuclear re | 41  | 0.5528961 | 1.5176056 | 0.0045403 | 0.0416009 | 0.0309292 |
| GO:0034366spherical  | 8   | -0.938237 | -2.157234 | 0.0046512 | 0.0419014 | 0.0311526 |
| GO:0071556integral c | 26  | 0.6468158 | 1.6365104 | 0.0047281 | 0.0419014 | 0.0311526 |
| GO:0098555lumenal si | 26  | 0.6468158 | 1.6365104 | 0.0047281 | 0.0419014 | 0.0311526 |
| GO:0005732small nucl | 20  | 0.6871797 | 1.6577513 | 0.0047904 | 0.0419014 | 0.0311526 |
| GO:0042611MHC protei | 21  | 0.6758808 | 1.6475831 | 0.0047962 | 0.0419014 | 0.0311526 |
| GO:0101031chaperone  | 21  | 0.6735995 | 1.6420221 | 0.0047962 | 0.0419014 | 0.0311526 |
| GO:0005667transcript | 341 | 0.3884387 | 1.2908105 | 0.004995  | 0.0429039 | 0.0318979 |
| GO:0031255cell proje | 324 | 0.3957987 | 1.3111177 | 0.004995  | 0.0429039 | 0.0318979 |
| GO:0045235tricarboxy | 14  | -0.709598 | -1.938648 | 0.0050251 | 0.0429039 | 0.0318979 |
| GO:0031085platelet c | 13  | -0.684678 | -1.820364 | 0.0051546 | 0.0430317 | 0.0319929 |
| GO:0034362low-densit | 13  | -0.683776 | -1.817967 | 0.0051546 | 0.0430317 | 0.0319929 |
| GO:0042627chylomicro | 13  | -0.765928 | -2.036387 | 0.0051546 | 0.0430317 | 0.0319929 |
| GO:0034361very-low-d | 19  | -0.724537 | -2.132656 | 0.0057803 | 0.0475507 | 0.0353527 |
| GO:0034385triglyceri | 19  | -0.724537 | -2.132656 | 0.0057803 | 0.0475507 | 0.0353527 |
| GO:0071682endocytic  | 20  | -0.601564 | -1.818162 | 0.005988  | 0.0485989 | 0.036132  |
| GO:0005635nuclear er | 439 | 0.378717  | 1.2673561 | 0.005994  | 0.0485989 | 0.036132  |
| GO:0032587ruffle men | 89  | 0.4748239 | 1.4457851 | 0.0062893 | 0.0501049 | 0.0372517 |
| GO:0005585fibrillar  | 11  | 0.7513515 | 1.6095537 | 0.0063131 | 0.0501049 | 0.0372517 |
| GO:0098645banded col | 11  | 0.7513515 | 1.6095537 | 0.0063131 | 0.0501049 | 0.0372517 |
| GO:0034364high-densi | 26  | -0.769313 | -2.496115 | 0.0064103 | 0.05052   | 0.0375603 |
| GO:0032432actin fila | 66  | 0.5070583 | 1.4895756 | 0.0064725 | 0.0506562 | 0.0376616 |
| GO:0005685U12-type s | 26  | 0.6077604 | 1.5376961 | 0.0070922 | 0.0542259 | 0.0403155 |
| GO:0030136clathrin-c | 178 | 0.4240939 | 1.3694639 | 0.0070922 | 0.0542259 | 0.0403155 |
| GO:0044305calyx of H | 24  | 0.6375586 | 1.5963063 | 0.007109  | 0.0542259 | 0.0403155 |
| GO:0030662coated ves | 172 | 0.4283815 | 1.3801036 | 0.0071211 | 0.0542259 | 0.0403155 |
| GO:0030665clathrin-c | 109 | 0.4635967 | 1.4436178 | 0.0072389 | 0.0547532 | 0.0407075 |

|                      |     |           |           |           |           |           |
|----------------------|-----|-----------|-----------|-----------|-----------|-----------|
| G0:003435plasma lip  | 36  | -0.702268 | -2.455396 | 0.0073529 | 0.0548792 | 0.0408013 |
| G0:199077lipoprotei  | 36  | -0.702268 | -2.455396 | 0.0073529 | 0.0548792 | 0.0408013 |
| G0:000219zona pellu  | 7   | 0.8106315 | 1.5539841 | 0.0077419 | 0.0574024 | 0.0426772 |
| G0:003204small-subu  | 34  | 0.5531901 | 1.4776197 | 0.008046  | 0.0590771 | 0.0439223 |
| G0:003065transport   | 198 | 0.4173303 | 1.352341  | 0.0080727 | 0.0590771 | 0.0439223 |
| G0:003299protein-li  | 38  | -0.684237 | -2.398133 | 0.0082645 | 0.0593174 | 0.0441009 |
| G0:199075microtubul  | 28  | 0.5876665 | 1.50378   | 0.0082938 | 0.0593174 | 0.0441009 |
| G0:003011membrane c  | 93  | 0.4679827 | 1.4330892 | 0.008316  | 0.0593174 | 0.0441009 |
| G0:004847coated men  | 93  | 0.4679827 | 1.4330892 | 0.008316  | 0.0593174 | 0.0441009 |
| G0:000568U2 snRNP    | 19  | 0.6692558 | 1.5915802 | 0.0084439 | 0.0598508 | 0.0444975 |
| G0:004658intercellu  | 6   | -0.838879 | -1.78566  | 0.008658  | 0.0609848 | 0.0453406 |
| G0:000578peroxisoma  | 48  | -0.775642 | -2.872245 | 0.009009  | 0.0626738 | 0.0465963 |
| G0:003190microbody   | 48  | -0.775642 | -2.872245 | 0.009009  | 0.0626738 | 0.0465963 |
| G0:004445nucleolar   | 167 | 0.4298751 | 1.3843497 | 0.0091463 | 0.0629458 | 0.0467986 |
| G0:000588intermedia  | 145 | 0.4302618 | 1.3748673 | 0.009165  | 0.0629458 | 0.0467986 |
| G0:003126DNA replic  | 5   | 0.8839036 | 1.5888771 | 0.0092715 | 0.0629458 | 0.0467986 |
| G0:003201phagolysos  | 5   | 0.8859506 | 1.5925568 | 0.0092715 | 0.0629458 | 0.0467986 |
| G0:00306890S prerik  | 29  | 0.5767465 | 1.4818755 | 0.0094899 | 0.0638889 | 0.0474997 |
| G0:004524dihydrolip  | 11  | -0.682631 | -1.709893 | 0.0095238 | 0.0638889 | 0.0474997 |
| G0:000050proteasome  | 61  | 0.5020641 | 1.4625212 | 0.0097297 | 0.0648841 | 0.0482396 |
| G0:003215cleavage f  | 49  | 0.5138336 | 1.4491236 | 0.010101  | 0.0669638 | 0.0497858 |
| G0:004264lactomyosin | 73  | 0.4819436 | 1.4358808 | 0.0106383 | 0.0701132 | 0.0521273 |
| G0:000593cell corte  | 283 | 0.3911374 | 1.2905973 | 0.011     | 0.0720756 | 0.0535863 |
| G0:000579Golgi-assc  | 164 | 0.4226161 | 1.3602511 | 0.0111675 | 0.0727502 | 0.0540879 |
| G0:003086cortical c  | 113 | 0.4453089 | 1.3889741 | 0.0113636 | 0.0734093 | 0.0545779 |
| G0:003088RNA polyme  | 99  | 0.4531213 | 1.3947022 | 0.011399  | 0.0734093 | 0.0545779 |
| G0:003258trans-Golgi | 83  | 0.4717229 | 1.4269173 | 0.0115789 | 0.0741447 | 0.0551247 |
| G0:004481DNA packag  | 26  | 0.5887248 | 1.4895342 | 0.0118203 | 0.0752628 | 0.0559559 |
| G0:000577peroxisoma  | 58  | -0.482966 | -1.858895 | 0.0121951 | 0.0764327 | 0.0568257 |
| G0:003190microbody   | 58  | -0.482966 | -1.858895 | 0.0121951 | 0.0764327 | 0.0568257 |
| G0:000989cytoplasmic | 148 | 0.4256355 | 1.3622157 | 0.0122075 | 0.0764327 | 0.0568257 |
| G0:005502nuclear DN  | 96  | 0.4585465 | 1.4083857 | 0.0124481 | 0.077316  | 0.0574824 |
| G0:003011clathrin c  | 44  | 0.521348  | 1.4455282 | 0.0124858 | 0.077316  | 0.0574824 |
| G0:000830integrin c  | 30  | 0.55911   | 1.4502123 | 0.0128655 | 0.0789474 | 0.0586953 |
| G0:009073site of DN  | 65  | 0.4861369 | 1.427839  | 0.0128894 | 0.0789474 | 0.0586953 |
| G0:003013endocytic   | 291 | 0.3886202 | 1.2825747 | 0.013     | 0.0791946 | 0.0588791 |
| G0:003125leading ec  | 161 | 0.4219777 | 1.3561763 | 0.0132114 | 0.0800496 | 0.0595148 |
| G0:001636nuclear ma  | 107 | 0.4476343 | 1.3897769 | 0.0134715 | 0.0808411 | 0.0601032 |
| G0:000042DNA-direct  | 97  | 0.4539196 | 1.3957371 | 0.0134855 | 0.0808411 | 0.0601032 |
| G0:003215cell divis  | 62  | 0.4903654 | 1.4349785 | 0.0139485 | 0.0815318 | 0.0606167 |
| G0:190536endopeptic  | 62  | 0.4924771 | 1.441158  | 0.0139485 | 0.0815318 | 0.0606167 |
| G0:000557fibrinogen  | 8   | -0.771521 | -1.773912 | 0.0139535 | 0.0815318 | 0.0606167 |
| G0:003109platelet a  | 65  | -0.433938 | -1.699562 | 0.0140845 | 0.0815318 | 0.0606167 |
| G0:000580trans-Golgi | 216 | 0.4045266 | 1.3165979 | 0.0141414 | 0.0815318 | 0.0606167 |
| G0:003215cell divis  | 57  | 0.5006838 | 1.4438627 | 0.0141921 | 0.0815318 | 0.0606167 |
| G0:000189phagocytic  | 24  | 0.5946861 | 1.4889628 | 0.014218  | 0.0815318 | 0.0606167 |
| G0:003066endocytic   | 156 | 0.422639  | 1.3551511 | 0.0142276 | 0.0815318 | 0.0606167 |
| G0:001646proton-tra  | 27  | 0.5731922 | 1.4571859 | 0.0142518 | 0.0815318 | 0.0606167 |
| G0:190472tertiary g  | 53  | 0.5004508 | 1.4296796 | 0.0144124 | 0.0817481 | 0.0607776 |
| G0:009864complex of  | 19  | 0.6443755 | 1.5324116 | 0.0144753 | 0.0817481 | 0.0607776 |
| G0:005503recycling   | 75  | 0.4708791 | 1.4085276 | 0.0147992 | 0.0817481 | 0.0607776 |

|                       |     |           |           |           |           |           |
|-----------------------|-----|-----------|-----------|-----------|-----------|-----------|
| GO:0016581NuRD compl  | 15  | 0.6625668 | 1.4994944 | 0.0148331 | 0.0817481 | 0.0607776 |
| GO:0090545CHD-type c  | 15  | 0.6625668 | 1.4994944 | 0.0148331 | 0.0817481 | 0.0607776 |
| GO:0001931uropod      | 12  | 0.7068336 | 1.54847   | 0.0148699 | 0.0817481 | 0.0607776 |
| GO:0031254cell trail  | 12  | 0.7068336 | 1.54847   | 0.0148699 | 0.0817481 | 0.0607776 |
| GO:1990025mitotic sp  | 12  | 0.7113285 | 1.5583171 | 0.0148699 | 0.0817481 | 0.0607776 |
| GO:0030135coated ves  | 271 | 0.3911826 | 1.2893579 | 0.0150301 | 0.0822276 | 0.061134  |
| GO:0044445synapse pe  | 902 | 0.3382414 | 1.1510815 | 0.015984  | 0.0866508 | 0.0644226 |
| GO:0034774secretory   | 310 | 0.3855493 | 1.2759818 | 0.016     | 0.0866508 | 0.0644226 |
| GO:0005682U5 snRNP    | 15  | 0.6515886 | 1.4746489 | 0.0160692 | 0.0866508 | 0.0644226 |
| GO:0045334clathrin-c  | 59  | 0.4964786 | 1.4433538 | 0.0161987 | 0.086933  | 0.0646324 |
| GO:0005885Arp2/3 pro  | 11  | 0.7291996 | 1.5620995 | 0.0164141 | 0.0876717 | 0.0651816 |
| GO:0031295replicatio  | 8   | 0.7797284 | 1.5545801 | 0.0165184 | 0.0878126 | 0.0652863 |
| GO:0035371microtubul  | 20  | 0.6207485 | 1.4974926 | 0.0167665 | 0.0887127 | 0.0659556 |
| GO:0030062mitochondr  | 6   | -0.798155 | -1.698974 | 0.017316  | 0.0911923 | 0.0677991 |
| GO:0034705methyltrar  | 107 | 0.4367823 | 1.3560843 | 0.0176166 | 0.0923437 | 0.0686551 |
| GO:0042827platelet c  | 20  | -0.548046 | -1.656409 | 0.0179641 | 0.093055  | 0.069184  |
| GO:0016607nuclear sp  | 377 | 0.3688624 | 1.2291396 | 0.018     | 0.093055  | 0.069184  |
| GO:0098857membrane n  | 303 | 0.3832664 | 1.2676431 | 0.018     | 0.093055  | 0.069184  |
| GO:0001725stress fik  | 61  | 0.4856515 | 1.414711  | 0.0183784 | 0.0941474 | 0.0699961 |
| GO:0097517contractil  | 61  | 0.4856515 | 1.414711  | 0.0183784 | 0.0941474 | 0.0699961 |
| GO:0045121membrane r  | 302 | 0.3833821 | 1.2678639 | 0.019     | 0.0961385 | 0.0714765 |
| GO:0031525microvillu  | 23  | 0.6047233 | 1.5037928 | 0.0190024 | 0.0961385 | 0.0714765 |
| GO:0031835haptoglobi  | 11  | -0.666261 | -1.668888 | 0.0190476 | 0.0961385 | 0.0714765 |
| GO:0005835chaperonir  | 10  | 0.7250128 | 1.5190526 | 0.0191083 | 0.0961385 | 0.0714765 |
| GO:0070385exocytic v  | 197 | 0.4056421 | 1.3126331 | 0.0192113 | 0.0962274 | 0.0715425 |
| GO:0001655fibrillar   | 125 | 0.4223082 | 1.3334308 | 0.0194076 | 0.0967802 | 0.0719535 |
| GO:0031091platelet e  | 89  | -0.381106 | -1.574173 | 0.0208333 | 0.1034325 | 0.0768993 |
| GO:0005655alpha DNA   | 5   | 0.838572  | 1.5073904 | 0.0211921 | 0.1047519 | 0.0778803 |
| GO:0005835proteasome  | 21  | 0.6098709 | 1.4866719 | 0.0215827 | 0.1060606 | 0.0788533 |
| GO:0038037G protein-  | 6   | -0.765432 | -1.629319 | 0.021645  | 0.1060606 | 0.0788533 |
| GO:0098635protein cc  | 33  | 0.5432055 | 1.4408233 | 0.0219653 | 0.1071641 | 0.0796737 |
| GO:0008021synaptic v  | 181 | 0.4085335 | 1.3190817 | 0.0223124 | 0.1083881 | 0.0805837 |
| GO:0098585membrane r  | 314 | 0.3789974 | 1.2548799 | 0.022977  | 0.1111378 | 0.082628  |
| GO:0044444cell corte  | 164 | 0.4093388 | 1.3175161 | 0.0233503 | 0.1119819 | 0.0832556 |
| GO:0098562cytoplasmic | 171 | 0.4109934 | 1.3250292 | 0.0233503 | 0.1119819 | 0.0832556 |
| GO:0031615spindle po  | 14  | 0.6534059 | 1.4623676 | 0.0236613 | 0.112837  | 0.0838913 |
| GO:0022627cytosolic   | 40  | 0.5181805 | 1.4178379 | 0.0237288 | 0.112837  | 0.0838913 |
| GO:0031985Golgi cist  | 99  | 0.4335936 | 1.3345962 | 0.0238342 | 0.1128619 | 0.0839099 |
| GO:0033267axon part   | 374 | 0.3642435 | 1.2137854 | 0.023976  | 0.1130585 | 0.084056  |
| GO:1903435calcitonir  | 5   | -0.793733 | -1.600381 | 0.0242915 | 0.1132407 | 0.0841915 |
| GO:0032580Golgi cist  | 75  | 0.4625351 | 1.3835684 | 0.0243129 | 0.1132407 | 0.0841915 |
| GO:0044795nuclear tr  | 191 | 0.4019774 | 1.2990936 | 0.0243161 | 0.1132407 | 0.0841915 |
| GO:0000315organellar  | 86  | 0.4514242 | 1.3699575 | 0.0251046 | 0.1157797 | 0.0860792 |
| GO:0005761mitochondr  | 86  | 0.4514242 | 1.3699575 | 0.0251046 | 0.1157797 | 0.0860792 |
| GO:0001772immunologi  | 35  | 0.5315835 | 1.4241837 | 0.0254042 | 0.1157797 | 0.0860792 |
| GO:0061675mitotic sp  | 8   | 0.7487289 | 1.492775  | 0.025413  | 0.1157797 | 0.0860792 |
| GO:0034665endoplasmic | 10  | 0.714151  | 1.4962951 | 0.0254777 | 0.1157797 | 0.0860792 |
| GO:0043255laminin cc  | 10  | 0.7163261 | 1.5008522 | 0.0254777 | 0.1157797 | 0.0860792 |
| GO:0060205cytoplasmic | 327 | 0.3716784 | 1.2318574 | 0.025974  | 0.1158512 | 0.0861323 |
| GO:0099565cytoplasmic | 469 | 0.3572079 | 1.1970976 | 0.025974  | 0.1158512 | 0.0861323 |
| GO:0150034distal axo  | 280 | 0.3784111 | 1.2489355 | 0.026026  | 0.1158512 | 0.0861323 |

|                       |     |           |           |           |           |           |
|-----------------------|-----|-----------|-----------|-----------|-----------|-----------|
| GO:0000151ubiquitin   | 266 | 0.3846904 | 1.2673723 | 0.0260521 | 0.1158512 | 0.0861323 |
| GO:0030687preribosome | 23  | 0.5863554 | 1.4581165 | 0.0261283 | 0.1158512 | 0.0861323 |
| GO:0030111AP-type me  | 43  | 0.504081  | 1.3917577 | 0.0261364 | 0.1158512 | 0.0861323 |
| GO:0044438microbody   | 96  | -0.639074 | -2.646218 | 0.0263158 | 0.1158512 | 0.0861323 |
| GO:0044438peroxisome  | 96  | -0.639074 | -2.646218 | 0.0263158 | 0.1158512 | 0.0861323 |
| GO:0032998protein-DN  | 111 | 0.4231625 | 1.3182811 | 0.0268595 | 0.1176058 | 0.0874368 |
| GO:0005687U4 snRNP    | 9   | 0.726768  | 1.4843732 | 0.0269231 | 0.1176058 | 0.0874368 |
| GO:0030137COPI-coate  | 26  | 0.5613352 | 1.4202358 | 0.0271868 | 0.1177152 | 0.0875181 |
| GO:0022624proteasome  | 24  | 0.5791051 | 1.4499516 | 0.0272512 | 0.1177152 | 0.0875181 |
| GO:0034708methylosom  | 12  | 0.6645166 | 1.4557656 | 0.0272615 | 0.1177152 | 0.0875181 |
| GO:0005697telomerase  | 20  | 0.604499  | 1.4582924 | 0.0275449 | 0.1184852 | 0.0880906 |
| GO:0030138clathrin c  | 19  | 0.6085594 | 1.447236  | 0.0277443 | 0.1188889 | 0.0883908 |
| GO:0031988vesicle lu  | 328 | 0.3709604 | 1.2298988 | 0.027972  | 0.1194109 | 0.0887788 |
| GO:0030864cortical e  | 87  | 0.4515012 | 1.3728459 | 0.0282132 | 0.1199858 | 0.0892063 |
| GO:0097441basal dend  | 7   | 0.7729145 | 1.4816803 | 0.0283871 | 0.1202716 | 0.0894188 |
| GO:0072562blood micr  | 109 | -0.622755 | -2.699004 | 0.0285714 | 0.1205993 | 0.0896624 |
| GO:0097477ribbon syr  | 10  | 0.6975945 | 1.4616057 | 0.0292994 | 0.1232104 | 0.0916037 |
| GO:0031518PcG protei  | 43  | 0.4986521 | 1.3767687 | 0.0295455 | 0.1236763 | 0.09195   |
| GO:0005648nuclear pc  | 80  | 0.4535019 | 1.3644127 | 0.0296296 | 0.1236763 | 0.09195   |
| GO:0010368chromocent  | 14  | 0.6373394 | 1.4264097 | 0.0298879 | 0.1241991 | 0.0923388 |
| GO:0015938small ribc  | 68  | 0.4638718 | 1.3656572 | 0.0300107 | 0.1241991 | 0.0923388 |
| GO:0061698transferas  | 240 | 0.3881103 | 1.2728712 | 0.0301811 | 0.1241991 | 0.0923388 |
| GO:0034707chloride c  | 48  | 0.4909602 | 1.382938  | 0.030303  | 0.1241991 | 0.0923388 |
| GO:0061208clathrin-s  | 8   | 0.7421065 | 1.4795716 | 0.0304956 | 0.1241991 | 0.0923388 |
| GO:0061208clathrin-s  | 8   | 0.7421065 | 1.4795716 | 0.0304956 | 0.1241991 | 0.0923388 |
| GO:1902554serine/thr  | 83  | 0.4503254 | 1.3621918 | 0.0305263 | 0.1241991 | 0.0923388 |
| GO:0015038Cajal body  | 55  | 0.4875312 | 1.4010034 | 0.0307355 | 0.1246002 | 0.092637  |
| GO:0060198clathrin-s  | 12  | 0.6629585 | 1.4523524 | 0.0309789 | 0.1251371 | 0.0930362 |
| GO:0005838proteasome  | 19  | 0.5993846 | 1.4254172 | 0.0313631 | 0.1262364 | 0.0938535 |
| GO:0042768GPI-anchor  | 5   | 0.8209392 | 1.4756943 | 0.0331126 | 0.1328038 | 0.0987362 |
| GO:0030427site of pc  | 174 | 0.4004941 | 1.293722  | 0.0334686 | 0.1336008 | 0.0993287 |
| GO:0033061DNA recomb  | 7   | 0.7624569 | 1.4616331 | 0.0335484 | 0.1336008 | 0.0993287 |
| GO:0000798condensin   | 8   | 0.7385784 | 1.4725375 | 0.0343075 | 0.1361428 | 0.1012186 |
| GO:0031228intrinsic   | 61  | 0.4675037 | 1.3618463 | 0.0345946 | 0.1368004 | 0.1017075 |
| GO:0033178proton-tra  | 25  | 0.562361  | 1.4127783 | 0.035503  | 0.1399015 | 0.1040131 |
| GO:0030138clathrin e  | 27  | 0.5419985 | 1.3778845 | 0.0356295 | 0.1399108 | 0.10402   |
| GO:0046658anchored c  | 58  | 0.4724573 | 1.3672888 | 0.0369565 | 0.1446181 | 0.1075197 |
| GO:0098798mitochondr  | 222 | 0.388167  | 1.2668387 | 0.0372233 | 0.1451581 | 0.1079212 |
| GO:0000238astral mic  | 11  | 0.6754905 | 1.4470434 | 0.0378788 | 0.1466989 | 0.1090668 |
| GO:0005818aster       | 11  | 0.6754905 | 1.4470434 | 0.0378788 | 0.1466989 | 0.1090668 |
| GO:0005777late endos  | 238 | 0.381978  | 1.2516298 | 0.0382294 | 0.1475497 | 0.1096993 |
| GO:0036477somatodend  | 804 | 0.3324677 | 1.1298132 | 0.038961  | 0.1498604 | 0.1114172 |
| GO:0035577azurophil   | 55  | 0.4783809 | 1.3747086 | 0.039517  | 0.1514819 | 0.1126228 |
| GO:0031234extrinsic   | 85  | 0.4383366 | 1.3263847 | 0.04      | 0.1527488 | 0.1135647 |
| GO:0018998host        | 70  | 0.4538077 | 1.3453723 | 0.0404255 | 0.1527488 | 0.1135647 |
| GO:0043657host cell   | 70  | 0.4538077 | 1.3453723 | 0.0404255 | 0.1527488 | 0.1135647 |
| GO:0005947mitochondr  | 5   | -0.750878 | -1.513973 | 0.0404858 | 0.1527488 | 0.1135647 |
| GO:0030428growth cor  | 170 | 0.3955338 | 1.2746546 | 0.040568  | 0.1527488 | 0.1135647 |
| GO:0031398Ctf18 RFC-  | 8   | 0.7280361 | 1.4515188 | 0.0406607 | 0.1527488 | 0.1135647 |
| GO:0099572postsynapt  | 334 | 0.3609361 | 1.1971122 | 0.040959  | 0.1532257 | 0.1139193 |
| GO:0005638lamin fila  | 5   | 0.8101369 | 1.4562764 | 0.0410596 | 0.1532257 | 0.1139193 |

|                      |     |           |           |           |           |           |
|----------------------|-----|-----------|-----------|-----------|-----------|-----------|
| G0:0055037recycling  | 161 | 0.3988004 | 1.2816877 | 0.0416667 | 0.1546778 | 0.1149989 |
| G0:0031258lamellipod | 22  | 0.5681302 | 1.3995287 | 0.0417661 | 0.1546778 | 0.1149989 |
| G0:0097648G protein- | 8   | -0.723926 | -1.664481 | 0.0418605 | 0.1546778 | 0.1149989 |
| G0:0098892extrinsic  | 6   | 0.7700086 | 1.4362104 | 0.0428016 | 0.1570513 | 0.1167635 |
| G0:0000118histone de | 55  | 0.4717211 | 1.3555704 | 0.0428101 | 0.1570513 | 0.1167635 |
| G0:0019774proteasome | 10  | 0.680936  | 1.4267027 | 0.0433121 | 0.1570513 | 0.1167635 |
| G0:0033178proton-tra | 10  | 0.6816956 | 1.4282942 | 0.0433121 | 0.1570513 | 0.1167635 |
| G0:0005777peroxisome | 125 | -0.580295 | -2.607773 | 0.0434783 | 0.1570513 | 0.1167635 |
| G0:0035777ribonucleo | 213 | 0.3854012 | 1.2523965 | 0.0434783 | 0.1570513 | 0.1167635 |
| G0:0042578microbody  | 125 | -0.580295 | -2.607773 | 0.0434783 | 0.1570513 | 0.1167635 |
| G0:0098978glutamater | 342 | 0.3570328 | 1.1864348 | 0.043956  | 0.1582698 | 0.1176695 |
| G0:0005652nuclear la | 11  | 0.6643863 | 1.4232559 | 0.0441919 | 0.1583421 | 0.1177232 |
| G0:1905368peptidase  | 84  | 0.4365066 | 1.320494  | 0.0442571 | 0.1583421 | 0.1177232 |
| G0:0016600flotillin  | 8   | 0.7215579 | 1.4386031 | 0.0444727 | 0.1586098 | 0.1179222 |
| G0:0014068postsynapt | 311 | 0.3645077 | 1.2060296 | 0.045     | 0.1599842 | 0.118944  |
| G0:0044352pinosome   | 8   | 0.7179639 | 1.4314374 | 0.047014  | 0.1649723 | 0.1226525 |
| G0:0044354macropinos | 8   | 0.7179639 | 1.4314374 | 0.047014  | 0.1649723 | 0.1226525 |
| G0:0098848postsynapt | 8   | 0.7178353 | 1.431181  | 0.047014  | 0.1649723 | 0.1226525 |
| G0:0005908clathrin-c | 68  | 0.4539474 | 1.3364393 | 0.0471597 | 0.1649723 | 0.1226525 |
| G0:0030894replisome  | 26  | 0.5450194 | 1.378955  | 0.0472813 | 0.1649723 | 0.1226525 |
| G0:0031430M band     | 26  | 0.5426721 | 1.3730161 | 0.0472813 | 0.1649723 | 0.1226525 |
| G0:0034718SMN-Sm pro | 17  | 0.5985306 | 1.3977543 | 0.047561  | 0.1654359 | 0.1229972 |
| G0:0005604basement m | 89  | 0.4298161 | 1.3087413 | 0.048218  | 0.1672053 | 0.1243127 |
| G0:0030478actin cort | 16  | 0.6023799 | 1.3867132 | 0.0489596 | 0.1683478 | 0.1251621 |
| G0:0061648endocytic  | 16  | 0.6023799 | 1.3867132 | 0.0489596 | 0.1683478 | 0.1251621 |
| G0:0000318organellar | 56  | 0.462549  | 1.3326765 | 0.0491803 | 0.1683478 | 0.1251621 |
| G0:0005762mitochondr | 56  | 0.462549  | 1.3326765 | 0.0491803 | 0.1683478 | 0.1251621 |
| G0:0031300intrinsic  | 222 | 0.3797527 | 1.2393772 | 0.0492958 | 0.1683478 | 0.1251621 |
| G0:0090538cation-tra | 15  | 0.6121755 | 1.3854508 | 0.0494438 | 0.1683478 | 0.1251621 |
| G0:0003682chromatin  | 491 | 0.3875248 | 1.3092281 | 0.000999  | 0.0428202 | 0.0353684 |
| G0:0003712transcript | 539 | 0.3854809 | 1.3066818 | 0.000999  | 0.0428202 | 0.0353684 |
| G0:0004672protein ki | 566 | 0.3892229 | 1.3201443 | 0.000999  | 0.0428202 | 0.0353684 |
| G0:0005198structural | 684 | 0.4173836 | 1.4248682 | 0.000999  | 0.0428202 | 0.0353684 |
| G0:0008047enzyme act | 476 | 0.3831493 | 1.29462   | 0.000999  | 0.0428202 | 0.0353684 |
| G0:0008092cytoskelet | 937 | 0.4162268 | 1.4281874 | 0.000999  | 0.0428202 | 0.0353684 |
| G0:0016301kinase act | 722 | 0.3677827 | 1.2574008 | 0.000999  | 0.0428202 | 0.0353684 |
| G0:0016462pyrophosph | 823 | 0.4045579 | 1.3862604 | 0.000999  | 0.0428202 | 0.0353684 |
| G0:0016817hydrolase  | 825 | 0.4042257 | 1.385331  | 0.000999  | 0.0428202 | 0.0353684 |
| G0:0016818hydrolase  | 825 | 0.4042257 | 1.385331  | 0.000999  | 0.0428202 | 0.0353684 |
| G0:0017111nucleoside | 778 | 0.4179197 | 1.4299864 | 0.000999  | 0.0428202 | 0.0353684 |
| G0:0019900kinase bir | 698 | 0.4207701 | 1.4370696 | 0.000999  | 0.0428202 | 0.0353684 |
| G0:0019901protein ki | 620 | 0.4317626 | 1.4693546 | 0.000999  | 0.0428202 | 0.0353684 |
| G0:0019904protein de | 675 | 0.4274799 | 1.4589065 | 0.000999  | 0.0428202 | 0.0353684 |
| G0:0030234enzyme reg | 950 | 0.3521207 | 1.2083923 | 0.000999  | 0.0428202 | 0.0353684 |
| G0:0050838cell adhes | 466 | 0.4791019 | 1.6183259 | 0.000999  | 0.0428202 | 0.0353684 |
| G0:0051020GTPase bir | 509 | 0.4084611 | 1.3812136 | 0.000999  | 0.0428202 | 0.0353684 |
| G0:0003778actin binc | 411 | 0.4195797 | 1.4118036 | 0.001     | 0.0428202 | 0.0353684 |
| G0:0004674protein se | 418 | 0.3900294 | 1.3137681 | 0.001     | 0.0428202 | 0.0353684 |
| G0:0016887ATPase act | 343 | 0.4054036 | 1.3567529 | 0.001     | 0.0428202 | 0.0353684 |
| G0:0017016Ras GTPase | 404 | 0.430043  | 1.445434  | 0.001     | 0.0428202 | 0.0353684 |
| G0:0031267small GTPa | 417 | 0.4217262 | 1.4206905 | 0.001     | 0.0428202 | 0.0353684 |

|                      |     |           |           |           |           |           |
|----------------------|-----|-----------|-----------|-----------|-----------|-----------|
| GO:006058nucleoside  | 312 | 0.4267149 | 1.421961  | 0.001     | 0.0428202 | 0.0353684 |
| GO:0015631tubulin bi | 321 | 0.4647836 | 1.5502077 | 0.001001  | 0.0428202 | 0.0353684 |
| GO:004529cadherin k  | 305 | 0.5118519 | 1.704152  | 0.001001  | 0.0428202 | 0.0353684 |
| GO:0003924GTPase act | 285 | 0.449839  | 1.4940631 | 0.001003  | 0.0428202 | 0.0353684 |
| GO:000512cytokine r  | 266 | 0.4258568 | 1.41007   | 0.001004  | 0.0428202 | 0.0353684 |
| GO:003069GTPase reg  | 274 | 0.4196461 | 1.3896685 | 0.001004  | 0.0428202 | 0.0353684 |
| GO:000509GTPase act  | 243 | 0.4257473 | 1.406672  | 0.001007  | 0.0428202 | 0.0353684 |
| GO:000512cytokine s  | 206 | 0.4361042 | 1.424281  | 0.0010081 | 0.0428202 | 0.0353684 |
| GO:000801microtubul  | 237 | 0.4792171 | 1.5796122 | 0.0010081 | 0.0428202 | 0.0353684 |
| GO:014009catalytic   | 197 | 0.4710792 | 1.536197  | 0.0010091 | 0.0428202 | 0.0353684 |
| GO:005101actin filam | 189 | 0.4644482 | 1.5131811 | 0.0010101 | 0.0428202 | 0.0353684 |
| GO:001704Rho GTPase  | 168 | 0.4632998 | 1.497902  | 0.0010142 | 0.0428202 | 0.0353684 |
| GO:001988protein ki  | 163 | 0.4726582 | 1.5239588 | 0.0010142 | 0.0428202 | 0.0353684 |
| GO:000802protein C-  | 182 | 0.447837  | 1.4518827 | 0.0010152 | 0.0428202 | 0.0353684 |
| GO:004239histone bi  | 182 | 0.4420676 | 1.4331783 | 0.0010152 | 0.0428202 | 0.0353684 |
| GO:000373structural  | 154 | 0.5221051 | 1.678139  | 0.0010173 | 0.0428202 | 0.0353684 |
| GO:000369single-str  | 105 | 0.5061651 | 1.585196  | 0.0010288 | 0.0428202 | 0.0353684 |
| GO:001990protein ph  | 135 | 0.4653193 | 1.4779535 | 0.0010288 | 0.0428202 | 0.0353684 |
| GO:001712SH3 domain  | 127 | 0.5165385 | 1.6343675 | 0.0010309 | 0.0428202 | 0.0353684 |
| GO:005108unfolded p  | 115 | 0.4923562 | 1.5416864 | 0.0010341 | 0.0428202 | 0.0353684 |
| GO:000517integrin k  | 125 | 0.4771789 | 1.5044288 | 0.0010352 | 0.0428202 | 0.0353684 |
| GO:000377microtubul  | 81  | 0.5447498 | 1.6617431 | 0.0010537 | 0.0428202 | 0.0353684 |
| GO:000809DNA-depend  | 65  | 0.5477382 | 1.6250703 | 0.0010811 | 0.0429498 | 0.0354754 |
| GO:009863cell-cell   | 50  | 0.5851533 | 1.6770829 | 0.001105  | 0.0429498 | 0.0354754 |
| GO:009864cadherin k  | 19  | 0.7045445 | 1.724233  | 0.0012121 | 0.0440991 | 0.0364248 |
| GO:007018DNA polym   | 17  | 0.7904225 | 1.8996367 | 0.0012151 | 0.0440991 | 0.0364248 |
| GO:000539sodium:pot  | 11  | 0.7943414 | 1.7194692 | 0.0012579 | 0.0440991 | 0.0364248 |
| GO:000855potassium-  | 11  | 0.7943414 | 1.7194692 | 0.0012579 | 0.0440991 | 0.0364248 |
| GO:005078RAGE recep  | 11  | 0.8132119 | 1.7603171 | 0.0012579 | 0.0440991 | 0.0364248 |
| GO:004353inositol l  | 5   | 0.9360264 | 1.6783195 | 0.0013387 | 0.0460303 | 0.0380198 |
| GO:001677transferas  | 852 | 0.355531  | 1.2182951 | 0.001998  | 0.0647439 | 0.0534768 |
| GO:000372mRNA bindi  | 244 | 0.4117834 | 1.3600945 | 0.0020141 | 0.0647439 | 0.0534768 |
| GO:001990phosphatas  | 179 | 0.4365207 | 1.4153057 | 0.0020305 | 0.0647439 | 0.0534768 |
| GO:000438helicase s  | 157 | 0.442875  | 1.4240103 | 0.0020346 | 0.0647439 | 0.0534768 |
| GO:004302ribonucle   | 130 | 0.4597553 | 1.4578858 | 0.002064  | 0.0647439 | 0.0534768 |
| GO:000367DNA helica  | 76  | 0.5240131 | 1.5840859 | 0.0021164 | 0.0652436 | 0.0538895 |
| GO:000381(protein-gl | 8   | 0.819802  | 1.6575459 | 0.002574  | 0.0736166 | 0.0608054 |
| GO:001518glycine tr  | 8   | 0.7819333 | 1.5809797 | 0.002574  | 0.0736166 | 0.0608054 |
| GO:001617superoxide  | 8   | 0.8169983 | 1.6518772 | 0.002574  | 0.0736166 | 0.0608054 |
| GO:004300ATP-depend  | 8   | 0.7831236 | 1.5833863 | 0.002574  | 0.0736166 | 0.0608054 |
| GO:001693galactosid  | 6   | 0.8544344 | 1.6026293 | 0.002635  | 0.0736166 | 0.0608054 |
| GO:005054icosatetra  | 6   | 0.8620482 | 1.6169101 | 0.002635  | 0.0736166 | 0.0608054 |
| GO:001986IgE bindin  | 5   | 0.9174503 | 1.6450121 | 0.0026774 | 0.0736484 | 0.0608317 |
| GO:001920kinase reg  | 189 | 0.4192465 | 1.365913  | 0.0030303 | 0.0820937 | 0.0678073 |
| GO:190293phosphatic  | 98  | 0.4653111 | 1.4444584 | 0.003112  | 0.0830495 | 0.0685967 |
| GO:004836Rac GTPase  | 66  | 0.5298886 | 1.5768242 | 0.0032328 | 0.0850025 | 0.0702099 |
| GO:000368DNA replic  | 24  | 0.6735663 | 1.7247964 | 0.0035757 | 0.0869481 | 0.0718169 |
| GO:000400ATP-depend  | 21  | 0.6758179 | 1.6926966 | 0.0036101 | 0.0869481 | 0.0718169 |
| GO:000802ATP-depend  | 21  | 0.6758179 | 1.6926966 | 0.0036101 | 0.0869481 | 0.0718169 |
| GO:004418protein bi  | 21  | 0.6805387 | 1.7045206 | 0.0036101 | 0.0869481 | 0.0718169 |
| GO:007003purine NTF  | 21  | 0.6758179 | 1.6926966 | 0.0036101 | 0.0869481 | 0.0718169 |

|                      |     |           |           |           |           |           |
|----------------------|-----|-----------|-----------|-----------|-----------|-----------|
| GO:004454S100 prote  | 14  | 0.737484  | 1.6926715 | 0.0037129 | 0.0869481 | 0.0718169 |
| GO:0005522profilin b | 11  | 0.7583145 | 1.6414836 | 0.0037736 | 0.0869481 | 0.0718169 |
| GO:0003997acyl-CoA c | 5   | -0.936695 | -1.838933 | 0.0039216 | 0.0869481 | 0.0718169 |
| GO:0004321fatty-acyl | 5   | -0.942901 | -1.851118 | 0.0039216 | 0.0869481 | 0.0718169 |
| GO:0015185gamma-amir | 5   | -0.965479 | -1.895443 | 0.0039216 | 0.0869481 | 0.0718169 |
| GO:0016015peptidogly | 5   | -0.922693 | -1.811444 | 0.0039216 | 0.0869481 | 0.0718169 |
| GO:0034987immunoglob | 7   | 0.8257071 | 1.6102177 | 0.003937  | 0.0869481 | 0.0718169 |
| GO:0050544arachidoni | 5   | 0.8878695 | 1.591973  | 0.0040161 | 0.0869481 | 0.0718169 |
| GO:0004024alcohol de | 7   | -0.962305 | -2.192926 | 0.0041667 | 0.0869481 | 0.0718169 |
| GO:0008172S-methyltr | 7   | -0.909166 | -2.071832 | 0.0041667 | 0.0869481 | 0.0718169 |
| GO:0015245fatty acid | 7   | -0.920692 | -2.098097 | 0.0041667 | 0.0869481 | 0.0718169 |
| GO:0016715oxidoreduc | 7   | -0.943197 | -2.149383 | 0.0041667 | 0.0869481 | 0.0718169 |
| GO:0098631cell adhes | 59  | 0.5466936 | 1.6056689 | 0.0043526 | 0.0869481 | 0.0718169 |
| GO:00038573-hydroxye | 8   | -0.909808 | -2.148321 | 0.0044444 | 0.0869481 | 0.0718169 |
| GO:0004022alcohol de | 8   | -0.959007 | -2.264494 | 0.0044444 | 0.0869481 | 0.0718169 |
| GO:0101022estrogen l | 8   | -0.952235 | -2.248505 | 0.0044444 | 0.0869481 | 0.0718169 |
| GO:0140161monocarbox | 8   | -0.95102  | -2.245634 | 0.0044444 | 0.0869481 | 0.0718169 |
| GO:0015355secondary  | 10  | -0.922596 | -2.311639 | 0.0045662 | 0.0869481 | 0.0718169 |
| GO:0003995acyl-CoA c | 11  | -0.862208 | -2.213506 | 0.0048309 | 0.0869481 | 0.0718169 |
| GO:00431383'-5' DNA  | 19  | 0.6800194 | 1.6642126 | 0.0048485 | 0.0869481 | 0.0718169 |
| GO:0017115single-str | 20  | 0.6712471 | 1.6584753 | 0.004878  | 0.0869481 | 0.0718169 |
| GO:0043142single-str | 20  | 0.6712471 | 1.6584753 | 0.004878  | 0.0869481 | 0.0718169 |
| GO:0016725oxidoreduc | 13  | -0.86231  | -2.326143 | 0.0049505 | 0.0869481 | 0.0718169 |
| GO:0016915retinal bi | 13  | -0.767974 | -2.071665 | 0.0049505 | 0.0869481 | 0.0718169 |
| GO:0070333aromatase  | 13  | -0.82457  | -2.224337 | 0.0049505 | 0.0869481 | 0.0718169 |
| GO:0016775phosphotra | 661 | 0.3623098 | 1.2352831 | 0.004995  | 0.0869481 | 0.0718169 |
| GO:0044385ubiquitin- | 295 | 0.4022841 | 1.3386148 | 0.005     | 0.0869481 | 0.0718169 |
| GO:0060090molecular  | 222 | 0.4075126 | 1.3403415 | 0.0050302 | 0.0869481 | 0.0718169 |
| GO:0032395MHC class  | 9   | 0.7656463 | 1.5898843 | 0.0051216 | 0.0869481 | 0.0718169 |
| GO:0004025aldehyde c | 15  | -0.69665  | -1.970427 | 0.0051282 | 0.0869481 | 0.0718169 |
| GO:0008395arachidoni | 15  | -0.912042 | -2.579646 | 0.0051282 | 0.0869481 | 0.0718169 |
| GO:0003996acyl-CoA l | 14  | -0.804925 | -2.22411  | 0.0051546 | 0.0869481 | 0.0718169 |
| GO:0010181FMN bindir | 14  | -0.710385 | -1.962885 | 0.0051546 | 0.0869481 | 0.0718169 |
| GO:0000062fatty-acyl | 20  | -0.663101 | -2.012343 | 0.0054945 | 0.0870836 | 0.0719288 |
| GO:0004806triglyceri | 20  | -0.789932 | -2.397242 | 0.0054945 | 0.0870836 | 0.0719288 |
| GO:0016405C-acyltrar | 18  | -0.815882 | -2.406607 | 0.0055249 | 0.0870836 | 0.0719288 |
| GO:0017127cholesterc | 18  | -0.604617 | -1.783438 | 0.0055249 | 0.0870836 | 0.0719288 |
| GO:0120020intermembr | 18  | -0.604617 | -1.783438 | 0.0055249 | 0.0870836 | 0.0719288 |
| GO:0008391arachidoni | 16  | -0.914622 | -2.570566 | 0.0055556 | 0.0870836 | 0.0719288 |
| GO:0015125bile acid  | 16  | -0.823591 | -2.314722 | 0.0055556 | 0.0870836 | 0.0719288 |
| GO:0015347sodium-inc | 16  | -0.730228 | -2.052325 | 0.0055556 | 0.0870836 | 0.0719288 |
| GO:0004745retinol de | 19  | -0.860071 | -2.556    | 0.0056497 | 0.0870836 | 0.0719288 |
| GO:0015645fatty acid | 19  | -0.777212 | -2.309755 | 0.0056497 | 0.0870836 | 0.0719288 |
| GO:0008485transamina | 21  | -0.7831   | -2.397357 | 0.005848  | 0.0893687 | 0.0738163 |
| GO:0016765transferas | 23  | -0.745031 | -2.389428 | 0.0059524 | 0.0901937 | 0.0744977 |
| GO:0031625ubiquitin  | 280 | 0.3998176 | 1.3253483 | 0.0060241 | 0.0905133 | 0.0747617 |
| GO:0023026MHC class  | 16  | 0.6996081 | 1.6596078 | 0.0060827 | 0.0906326 | 0.0748602 |
| GO:0016406CoA-ligase | 24  | -0.672466 | -2.166888 | 0.006135  | 0.0906556 | 0.0748792 |
| GO:0005345organic ac | 27  | -0.588875 | -1.969619 | 0.0064516 | 0.092222  | 0.076173  |
| GO:0016702oxidoreduc | 27  | -0.608077 | -2.033842 | 0.0064516 | 0.092222  | 0.076173  |
| GO:0031491nucleosome | 53  | 0.5434789 | 1.5694099 | 0.0066152 | 0.092222  | 0.076173  |

|                      |     |           |           |           |           |           |
|----------------------|-----|-----------|-----------|-----------|-----------|-----------|
| GO:0016701oxidoreduc | 28  | -0.593978 | -1.995069 | 0.0066225 | 0.092222  | 0.076173  |
| GO:0016876acid-thiol | 28  | -0.672719 | -2.259549 | 0.0066225 | 0.092222  | 0.076173  |
| GO:0019841isoprenoic | 28  | -0.521748 | -1.752463 | 0.0066225 | 0.092222  | 0.076173  |
| GO:0033764steroid de | 26  | -0.680959 | -2.207163 | 0.0066225 | 0.092222  | 0.076173  |
| GO:0016538cyclin-dep | 43  | 0.5707396 | 1.5989743 | 0.0067265 | 0.092222  | 0.076173  |
| GO:0016712oxidoreduc | 29  | -0.852089 | -2.883975 | 0.0067568 | 0.092222  | 0.076173  |
| GO:0071945FAD bindir | 29  | -0.60313  | -2.041349 | 0.0067568 | 0.092222  | 0.076173  |
| GO:0015175neutral an | 31  | 0.6180729 | 1.6431912 | 0.006993  | 0.0947235 | 0.0782391 |
| GO:0016228steroid de | 30  | -0.736535 | -2.479272 | 0.0071429 | 0.0948757 | 0.0783649 |
| GO:0000217DNA secon  | 24  | 0.6426535 | 1.6456381 | 0.0071514 | 0.0948757 | 0.0783649 |
| GO:0017134fibroblast | 23  | 0.6529437 | 1.6547803 | 0.0071942 | 0.0948757 | 0.0783649 |
| GO:0003774motor acti | 131 | 0.4405699 | 1.3978173 | 0.0072165 | 0.0948757 | 0.0783649 |
| GO:0035325Toll-like  | 12  | 0.7195748 | 1.5899266 | 0.0075662 | 0.0970157 | 0.0801325 |
| GO:0042378chemokine  | 59  | 0.5280638 | 1.5509521 | 0.007617  | 0.0970157 | 0.0801325 |
| GO:0004495N,N-dimeth | 5   | -0.874968 | -1.717749 | 0.0078431 | 0.0970157 | 0.0801325 |
| GO:0016841ammonia-ly | 5   | -0.880377 | -1.728368 | 0.0078431 | 0.0970157 | 0.0801325 |
| GO:0030976thiamine p | 5   | -0.874043 | -1.715934 | 0.0078431 | 0.0970157 | 0.0801325 |
| GO:0004715non-membra | 45  | 0.5507629 | 1.5508099 | 0.0079007 | 0.0970157 | 0.0801325 |
| GO:0042168SH2 domair | 36  | 0.5863192 | 1.5987185 | 0.0079545 | 0.0970157 | 0.0801325 |
| GO:0001882nucleoside | 339 | 0.3894688 | 1.3015878 | 0.008008  | 0.0970157 | 0.0801325 |
| GO:0001885purine nuc | 331 | 0.3883041 | 1.2973337 | 0.008008  | 0.0970157 | 0.0801325 |
| GO:0008395steroid hy | 35  | -0.868307 | -3.070755 | 0.0081301 | 0.0970157 | 0.0801325 |
| GO:1901981phosphatic | 145 | 0.4314033 | 1.3802886 | 0.00818   | 0.0970157 | 0.0801325 |
| GO:0016700oxidoreduc | 36  | -0.749878 | -2.660996 | 0.0081967 | 0.0970157 | 0.0801325 |
| GO:0016877ligase act | 38  | -0.561991 | -2.021668 | 0.0081967 | 0.0970157 | 0.0801325 |
| GO:0019826oxygen bir | 36  | -0.776657 | -2.756022 | 0.0081967 | 0.0970157 | 0.0801325 |
| GO:0003988acetyl-CoA | 6   | -0.86653  | -1.826675 | 0.0082305 | 0.0970157 | 0.0801325 |
| GO:0042826histone de | 106 | 0.4471114 | 1.3998176 | 0.0082474 | 0.0970157 | 0.0801325 |
| GO:0030176pyridoxal  | 45  | -0.782213 | -2.920953 | 0.0086207 | 0.0987432 | 0.0815594 |
| GO:0070275vitamin B6 | 45  | -0.782213 | -2.920953 | 0.0086207 | 0.0987432 | 0.0815594 |
| GO:0016755transferas | 14  | 0.6706514 | 1.5392776 | 0.0086634 | 0.0987432 | 0.0815594 |
| GO:0016175superoxide | 10  | 0.7444165 | 1.5741757 | 0.00894   | 0.0987432 | 0.0815594 |
| GO:0010997anaphase-p | 8   | 0.7493031 | 1.5150052 | 0.009009  | 0.0987432 | 0.0815594 |
| GO:0016830carbon-car | 44  | -0.462114 | -1.701578 | 0.009009  | 0.0987432 | 0.0815594 |
| GO:0016861intramolec | 8   | 0.7471821 | 1.5107169 | 0.009009  | 0.0987432 | 0.0815594 |
| GO:0004875nuclear re | 47  | -0.468696 | -1.77917  | 0.0090909 | 0.0987432 | 0.0815594 |
| GO:0016900oxidoreduc | 43  | -0.55228  | -2.007028 | 0.0090909 | 0.0987432 | 0.0815594 |
| GO:0017046peptide hc | 47  | -0.51424  | -1.952057 | 0.0090909 | 0.0987432 | 0.0815594 |
| GO:0098531transcript | 47  | -0.468696 | -1.77917  | 0.0090909 | 0.0987432 | 0.0815594 |
| GO:1901615organic hy | 43  | -0.626491 | -2.276718 | 0.0090909 | 0.0987432 | 0.0815594 |
| GO:0043515kinetochor | 6   | 0.8265088 | 1.5502502 | 0.0092227 | 0.0987432 | 0.0815594 |
| GO:0050542icosanoid  | 6   | 0.8177508 | 1.5338232 | 0.0092227 | 0.0987432 | 0.0815594 |
| GO:1990226histone me | 6   | 0.8158601 | 1.530277  | 0.0092227 | 0.0987432 | 0.0815594 |
| GO:0004185serine-tyr | 5   | 0.8614993 | 1.5446905 | 0.0093708 | 0.0997323 | 0.0823763 |
| GO:0005132type I int | 12  | -0.711568 | -1.891662 | 0.0095694 | 0.0999883 | 0.0825877 |
| GO:0005372water tran | 12  | -0.753842 | -2.004044 | 0.0095694 | 0.0999883 | 0.0825877 |
| GO:0015250water char | 11  | -0.768922 | -1.974019 | 0.0096618 | 0.0999883 | 0.0825877 |
| GO:0050840extracellu | 55  | 0.5270371 | 1.5334507 | 0.0098253 | 0.0999883 | 0.0825877 |
| GO:0004467long-chair | 13  | -0.673142 | -1.815848 | 0.009901  | 0.0999883 | 0.0825877 |
| GO:0015375anion:sodi | 13  | -0.65819  | -1.775515 | 0.009901  | 0.0999883 | 0.0825877 |
| GO:0016865intramolec | 13  | -0.741947 | -2.001456 | 0.009901  | 0.0999883 | 0.0825877 |



|                       |     |           |           |           |           |           |
|-----------------------|-----|-----------|-----------|-----------|-----------|-----------|
| GO:0019841retinol bi  | 13  | -0.727476 | -1.962418 | 0.009901  | 0.0999883 | 0.0825877 |
| GO:0008021monocarbox  | 48  | -0.718098 | -2.71335  | 0.01      | 0.0999883 | 0.0825877 |
| GO:0032541ribonucleic | 332 | 0.3830753 | 1.2797942 | 0.01001   | 0.0999883 | 0.0825877 |
| GO:0032551purine rib  | 328 | 0.3843217 | 1.2836675 | 0.01001   | 0.0999883 | 0.0825877 |
| GO:0042161neurotrans  | 52  | -0.535608 | -2.033242 | 0.010101  | 0.1003367 | 0.0828755 |
| GO:0046871ephrin rec  | 27  | 0.6236421 | 1.6311869 | 0.0106257 | 0.1045125 | 0.0863246 |
| GO:0016831hydro-lyas  | 51  | -0.430259 | -1.612911 | 0.0106383 | 0.1045125 | 0.0863246 |
| GO:0003681damaged DN  | 62  | 0.5099813 | 1.503027  | 0.0108814 | 0.1063166 | 0.0878147 |
| GO:0035091phosphatic  | 224 | 0.3990863 | 1.3122315 | 0.0110775 | 0.1076448 | 0.0889119 |
| GO:0050701CARD domai  | 15  | 0.6641461 | 1.5463643 | 0.0111524 | 0.1077866 | 0.089029  |
| GO:0003701steroid ho  | 56  | -0.470239 | -1.770609 | 0.0116279 | 0.1094247 | 0.090382  |
| GO:0016591amino acid  | 55  | -0.677835 | -2.545262 | 0.0116279 | 0.1094247 | 0.090382  |
| GO:0016621oxidoreduc  | 56  | -0.573241 | -2.158448 | 0.0116279 | 0.1094247 | 0.090382  |
| GO:0033291monocarbox  | 56  | -0.428336 | -1.612833 | 0.0116279 | 0.1094247 | 0.090382  |
| GO:0051281NAD bindir  | 56  | -0.476322 | -1.793515 | 0.0116279 | 0.1094247 | 0.090382  |
| GO:0009371biotin bir  | 5   | -0.867189 | -1.702479 | 0.0117647 | 0.1096888 | 0.0906001 |
| GO:0015121lactate tr  | 6   | 0.8087349 | 1.5169124 | 0.0118577 | 0.1096888 | 0.0906001 |
| GO:0120011intermembr  | 23  | -0.563036 | -1.805741 | 0.0119048 | 0.1096888 | 0.0906001 |
| GO:0023021MHC protei  | 24  | 0.6213292 | 1.5910333 | 0.011919  | 0.1096888 | 0.0906001 |
| GO:0042601peptide ar  | 22  | 0.6369814 | 1.6046924 | 0.0119904 | 0.1096888 | 0.0906001 |
| GO:0005521GTP bindir  | 324 | 0.3828579 | 1.2772744 | 0.012024  | 0.1096888 | 0.0906001 |
| GO:0030671protein bi  | 165 | 0.4155862 | 1.342126  | 0.0121581 | 0.1098577 | 0.0907396 |
| GO:0035171histone ki  | 16  | 0.6570178 | 1.5585751 | 0.0121655 | 0.1098577 | 0.0907396 |
| GO:0016641oxidoreduc  | 25  | -0.541031 | -1.777626 | 0.0124224 | 0.111171  | 0.0918244 |
| GO:0005201structural  | 97  | 0.4508544 | 1.3981803 | 0.0124352 | 0.111171  | 0.0918244 |
| GO:0052651NADP-retir  | 10  | 0.7225069 | 1.5278447 | 0.0127714 | 0.1136082 | 0.0938375 |
| GO:0005501retinoid k  | 27  | -0.523556 | -1.751144 | 0.0129032 | 0.1138504 | 0.0940375 |
| GO:0042281MHC protei  | 26  | 0.6137294 | 1.6016251 | 0.012926  | 0.1138504 | 0.0940375 |
| GO:0034231GPI anchor  | 7   | 0.7734479 | 1.5083065 | 0.0131234 | 0.1150224 | 0.0950055 |
| GO:0004301enoyl-CoA   | 8   | -0.83842  | -1.979753 | 0.0133333 | 0.1151691 | 0.0951267 |
| GO:0008401retinoic a  | 8   | -0.820666 | -1.937831 | 0.0133333 | 0.1151691 | 0.0951267 |
| GO:0016631oxidoreduc  | 8   | -0.831074 | -1.962407 | 0.0133333 | 0.1151691 | 0.0951267 |
| GO:0032181ubiquitin-  | 92  | 0.4613388 | 1.4245947 | 0.0135417 | 0.1164063 | 0.0961486 |
| GO:0015651quaternary  | 10  | -0.775836 | -1.943919 | 0.0136986 | 0.1171921 | 0.0967977 |
| GO:0005321long-chair  | 11  | -0.678856 | -1.742794 | 0.0144928 | 0.1233954 | 0.1019215 |
| GO:0043021cysteine-t  | 40  | 0.5375298 | 1.492453  | 0.0145903 | 0.1236376 | 0.1021215 |
| GO:0008531Ran GTPase  | 36  | 0.5490434 | 1.4970785 | 0.0147727 | 0.1245926 | 0.1029103 |
| GO:0050661oxidoreduc  | 15  | 0.6529254 | 1.5202384 | 0.0148699 | 0.1248233 | 0.1031008 |
| GO:0015371solute:so   | 71  | -0.52482  | -2.089886 | 0.0153846 | 0.1276309 | 0.1054199 |
| GO:0016591glycine bi  | 15  | -0.573098 | -1.620968 | 0.0153846 | 0.1276309 | 0.1054199 |
| GO:0003821antigen bi  | 51  | 0.5098906 | 1.4651682 | 0.0154185 | 0.1276309 | 0.1054199 |
| GO:0016831carbon-oxy  | 70  | -0.370469 | -1.453544 | 0.015625  | 0.1287442 | 0.1063394 |
| GO:0032811tumor necr  | 45  | 0.5222268 | 1.4704593 | 0.0158014 | 0.1296001 | 0.1070464 |
| GO:0016621oxidoreduc  | 35  | -0.50112  | -1.772203 | 0.0162602 | 0.1327542 | 0.1096516 |
| GO:0004861protein ki  | 57  | 0.49842   | 1.4572481 | 0.0163577 | 0.1329434 | 0.1098078 |
| GO:0016711oxidoreduc  | 7   | -0.850125 | -1.937287 | 0.0166667 | 0.1348416 | 0.1113757 |
| GO:0120011intermembr  | 19  | -0.599486 | -1.78158  | 0.0169492 | 0.1363926 | 0.1126568 |
| GO:0055101ubiquitin-  | 17  | 0.6294977 | 1.5128832 | 0.0170109 | 0.1363926 | 0.1126568 |
| GO:0005201extracellu  | 160 | 0.4160899 | 1.339747  | 0.0172414 | 0.1370115 | 0.113168  |
| GO:0050661flavin ade  | 75  | -0.524892 | -2.123059 | 0.0172414 | 0.1370115 | 0.113168  |
| GO:0033031bitter tas  | 21  | -0.569439 | -1.743262 | 0.0175439 | 0.1383487 | 0.1142725 |

|                      |     |           |           |           |           |           |
|----------------------|-----|-----------|-----------|-----------|-----------|-----------|
| GO:0043236laminin bi | 29  | 0.5671921 | 1.5005104 | 0.0175644 | 0.1383487 | 0.1142725 |
| GO:0008198ferrous ir | 23  | -0.513647 | -1.647343 | 0.0178571 | 0.1394641 | 0.1151938 |
| GO:0000774adenyl-nuc | 9   | 0.7186463 | 1.4922876 | 0.0179257 | 0.1394641 | 0.1151938 |
| GO:0030546receptor r | 472 | 0.3582624 | 1.2103573 | 0.017982  | 0.1394641 | 0.1151938 |
| GO:0070996snRNP bind | 8   | 0.7283866 | 1.4727144 | 0.018018  | 0.1394641 | 0.1151938 |
| GO:0017156sodium:dic | 9   | -0.777238 | -1.929005 | 0.0180995 | 0.1394913 | 0.1152163 |
| GO:0015378sodium:chl | 10  | -0.717178 | -1.796946 | 0.0182648 | 0.1401611 | 0.1157695 |
| GO:0005546odorant bi | 24  | -0.525583 | -1.693587 | 0.0184049 | 0.1406324 | 0.1161587 |
| GO:0016628oxidoreduc | 25  | -0.46442  | -1.52591  | 0.0186335 | 0.1417735 | 0.1171013 |
| GO:0031492nucleosome | 25  | 0.5950985 | 1.5368711 | 0.019025  | 0.1435302 | 0.1185522 |
| GO:0043027cysteine-t | 25  | 0.5896694 | 1.5228502 | 0.019025  | 0.1435302 | 0.1185522 |
| GO:0015036disulfide  | 39  | 0.5346883 | 1.4752997 | 0.0192308 | 0.1441605 | 0.1190729 |
| GO:0017137Rab GTPase | 162 | 0.4116796 | 1.3268474 | 0.0192698 | 0.1441605 | 0.1190729 |
| GO:0043178alcohol bi | 82  | -0.380267 | -1.542574 | 0.0196078 | 0.1454415 | 0.120131  |
| GO:0005154epidermal  | 32  | 0.562886  | 1.5014024 | 0.0196305 | 0.1454415 | 0.120131  |
| GO:0015196L-proline  | 7   | 0.7629212 | 1.4877783 | 0.019685  | 0.1454415 | 0.120131  |
| GO:0004867serine-tyr | 84  | -0.411537 | -1.703869 | 0.02      | 0.1459592 | 0.1205585 |
| GO:0019001guanyl nuc | 342 | 0.3701134 | 1.2388429 | 0.02      | 0.1459592 | 0.1205585 |
| GO:0032561guanyl rik | 342 | 0.3701134 | 1.2388429 | 0.02      | 0.1459592 | 0.1205585 |
| GO:0043133ubiquitin  | 72  | 0.4679    | 1.4070624 | 0.0202343 | 0.1470688 | 0.121475  |
| GO:0015141succinate  | 6   | -0.851562 | -1.795122 | 0.0205761 | 0.1474639 | 0.1218014 |
| GO:0043878glyceralde | 6   | -0.857491 | -1.807621 | 0.0205761 | 0.1474639 | 0.1218014 |
| GO:0004716protein ty | 133 | 0.4211646 | 1.3376967 | 0.0205973 | 0.1474639 | 0.1218014 |
| GO:0050661NADP bindi | 50  | -0.421349 | -1.587624 | 0.0206186 | 0.1474639 | 0.1218014 |
| GO:0030492hemoglobir | 7   | -0.819018 | -1.8664   | 0.0208333 | 0.1484064 | 0.1225799 |
| GO:0001851complement | 5   | 0.8350448 | 1.4972568 | 0.021419  | 0.151973  | 0.1255258 |
| GO:0004497monooxyger | 90  | -0.763204 | -3.177169 | 0.0222222 | 0.1570487 | 0.1297182 |
| GO:0016624oxidoreduc | 9   | -0.745604 | -1.850495 | 0.0226244 | 0.1591938 | 0.13149   |
| GO:0004222metalloenc | 100 | 0.4411917 | 1.3746848 | 0.0227038 | 0.1591938 | 0.13149   |
| GO:0004306estradiol  | 10  | -0.669384 | -1.677194 | 0.0228311 | 0.1592361 | 0.1315249 |
| GO:0003727single-str | 89  | 0.4499786 | 1.3844731 | 0.0229645 | 0.1592361 | 0.1315249 |
| GO:0008134transcript | 642 | 0.3442927 | 1.1724646 | 0.022977  | 0.1592361 | 0.1315249 |
| GO:0044766ATPase act | 20  | 0.6071671 | 1.5001506 | 0.0231707 | 0.1593433 | 0.1316135 |
| GO:0046961proton-tra | 20  | 0.6071671 | 1.5001506 | 0.0231707 | 0.1593433 | 0.1316135 |
| GO:0003716transcript | 309 | 0.3719289 | 1.2391744 | 0.024     | 0.1638188 | 0.1353101 |
| GO:0140096catalytic  | 335 | 0.3706685 | 1.2387231 | 0.024024  | 0.1638188 | 0.1353101 |
| GO:0003926GPI-anchor | 5   | 0.8209392 | 1.4719652 | 0.0240964 | 0.1638188 | 0.1353101 |
| GO:0015137citrate tr | 6   | -0.822871 | -1.73464  | 0.0246914 | 0.1655556 | 0.1367446 |
| GO:0015142tricarboxy | 6   | -0.822871 | -1.73464  | 0.0246914 | 0.1655556 | 0.1367446 |
| GO:0035476lipase bir | 6   | -0.820056 | -1.728705 | 0.0246914 | 0.1655556 | 0.1367446 |
| GO:0015101organic ca | 25  | -0.448307 | -1.472971 | 0.0248447 | 0.1655556 | 0.1367446 |
| GO:0070326lipoprotei | 25  | -0.457438 | -1.502972 | 0.0248447 | 0.1655556 | 0.1367446 |
| GO:0005496steroid bi | 93  | -0.455655 | -1.883873 | 0.025     | 0.1655556 | 0.1367446 |
| GO:0015206nucleobase | 7   | -0.793995 | -1.809376 | 0.025     | 0.1655556 | 0.1367446 |
| GO:0031996thioester  | 11  | 0.6790206 | 1.4698403 | 0.0251572 | 0.165982  | 0.1370969 |
| GO:0005164tumor necr | 30  | 0.5464795 | 1.454941  | 0.025522  | 0.1673217 | 0.1382035 |
| GO:0000406four-way j | 16  | 0.6215493 | 1.474437  | 0.0255474 | 0.1673217 | 0.1382035 |
| GO:0008006chemokine  | 46  | 0.5031694 | 1.4234086 | 0.0257559 | 0.1675726 | 0.1384107 |
| GO:0030556cGMP bindi | 14  | -0.605481 | -1.67302  | 0.0257732 | 0.1675726 | 0.1384107 |
| GO:0042562hormone bi | 98  | -0.396748 | -1.66446  | 0.0263158 | 0.1689342 | 0.1395353 |
| GO:0008246omega pept | 11  | 0.6706828 | 1.4517919 | 0.0264151 | 0.1689342 | 0.1395353 |

|           |            |     |           |           |           |           |           |
|-----------|------------|-----|-----------|-----------|-----------|-----------|-----------|
| G0:000532 | neurotrans | 26  | -0.442086 | -1.432914 | 0.0264901 | 0.1689342 | 0.1395353 |
| G0:000852 | taste rece | 26  | -0.429681 | -1.392709 | 0.0264901 | 0.1689342 | 0.1395353 |
| G0:190156 | fatty acid | 26  | -0.440701 | -1.428426 | 0.0264901 | 0.1689342 | 0.1395353 |
| G0:000500 | fibroblast | 5   | 0.8106171 | 1.4534574 | 0.0267738 | 0.1689342 | 0.1395353 |
| G0:001564 | toxic subs | 10  | -0.657663 | -1.647828 | 0.0273973 | 0.1689342 | 0.1395353 |
| G0:001645 | C-acetyltr | 5   | -0.843301 | -1.65558  | 0.027451  | 0.1689342 | 0.1395353 |
| G0:003184 | olfactory  | 5   | -0.853695 | -1.675987 | 0.027451  | 0.1689342 | 0.1395353 |
| G0:002285 | active ior | 51  | 0.4949987 | 1.4223765 | 0.027533  | 0.1689342 | 0.1395353 |
| G0:004262 | ATPase cou | 51  | 0.4949987 | 1.4223765 | 0.027533  | 0.1689342 | 0.1395353 |
| G0:199044 | U1 snRNP b | 6   | 0.7752637 | 1.4541318 | 0.027668  | 0.1689342 | 0.1395353 |
| G0:000531 | lipid tran | 125 | -0.549973 | -2.392467 | 0.0277778 | 0.1689342 | 0.1395353 |
| G0:001524 | sterol tra | 31  | -0.449696 | -1.547435 | 0.0277778 | 0.1689342 | 0.1395353 |
| G0:001687 | ligase act | 117 | -0.336109 | -1.461911 | 0.0277778 | 0.1689342 | 0.1395353 |
| G0:001984 | vitamin bi | 123 | -0.590281 | -2.577664 | 0.0277778 | 0.1689342 | 0.1395353 |
| G0:002003 | heme bindi | 123 | -0.620368 | -2.70905  | 0.0277778 | 0.1689342 | 0.1395353 |
| G0:005268 | carboxylic | 116 | -0.398008 | -1.719468 | 0.0277778 | 0.1689342 | 0.1395353 |
| G0:005510 | lipase inh | 16  | -0.593152 | -1.667068 | 0.0277778 | 0.1689342 | 0.1395353 |
| G0:000551 | collagen b | 67  | 0.4619064 | 1.37321   | 0.0280475 | 0.1694877 | 0.1399925 |
| G0:003002 | extracellu | 40  | 0.516179  | 1.4331725 | 0.0280584 | 0.1694877 | 0.1399925 |
| G0:000851 | ammonium t | 30  | -0.44522  | -1.498669 | 0.0285714 | 0.1720058 | 0.1420724 |
| G0:007030 | phosphatic | 19  | 0.6046393 | 1.4797349 | 0.0290909 | 0.1735585 | 0.1433549 |
| G0:000166 | G protein- | 256 | 0.3797004 | 1.2568648 | 0.0291165 | 0.1735585 | 0.1433549 |
| G0:000371 | transcript | 227 | 0.3855198 | 1.2682358 | 0.0291751 | 0.1735585 | 0.1433549 |
| G0:009747 | cyclin-dep | 29  | 0.5515807 | 1.4592106 | 0.029274  | 0.1735585 | 0.1433549 |
| G0:000498 | olfactory  | 113 | -0.543528 | -2.315565 | 0.0294118 | 0.1735585 | 0.1433549 |
| G0:001661 | oxidoreduc | 111 | -0.522186 | -2.214819 | 0.0294118 | 0.1735585 | 0.1433549 |
| G0:000853 | N-acetylle | 8   | 0.7169395 | 1.4495698 | 0.029601  | 0.1736961 | 0.1434685 |
| G0:001555 | C4-dicarbo | 13  | -0.578679 | -1.561028 | 0.029703  | 0.1736961 | 0.1434685 |
| G0:001705 | structural | 25  | 0.5635893 | 1.455497  | 0.0297265 | 0.1736961 | 0.1434685 |
| G0:001529 | solute:cat | 100 | -0.414793 | -1.715168 | 0.030303  | 0.176488  | 0.1457746 |
| G0:003054 | acetylchol | 10  | 0.680391  | 1.4387844 | 0.0306513 | 0.1773612 | 0.1464958 |
| G0:009960 | neurotrans | 10  | 0.680391  | 1.4387844 | 0.0306513 | 0.1773612 | 0.1464958 |
| G0:004801 | receptor l | 440 | 0.3526357 | 1.1884985 | 0.031     | 0.1785144 | 0.1474483 |
| G0:000837 | galactosyl | 32  | 0.539745  | 1.4396778 | 0.0311778 | 0.1785144 | 0.1474483 |
| G0:001661 | oxidoreduc | 120 | -0.533709 | -2.300506 | 0.03125   | 0.1785144 | 0.1474483 |
| G0:004690 | tetrapyrro | 131 | -0.597916 | -2.598281 | 0.03125   | 0.1785144 | 0.1474483 |
| G0:003813 | neuregulir | 5   | 0.8014584 | 1.4370357 | 0.0321285 | 0.1826316 | 0.150849  |
| G0:009951 | voltage-ga | 8   | 0.7084341 | 1.4323728 | 0.032175  | 0.1826316 | 0.150849  |
| G0:004776 | butyrate-C | 6   | -0.80444  | -1.695786 | 0.0329218 | 0.18625   | 0.1538377 |
| G0:004262 | ATPase act | 258 | 0.3777013 | 1.2503108 | 0.0330993 | 0.18625   | 0.1538377 |
| G0:001991 | structural | 9   | 0.6861044 | 1.4247135 | 0.0332907 | 0.18625   | 0.1538377 |
| G0:005188 | G-quadrupl | 9   | 0.688169  | 1.4290008 | 0.0332907 | 0.18625   | 0.1538377 |
| G0:001529 | symporter  | 139 | -0.384702 | -1.709547 | 0.0333333 | 0.18625   | 0.1538377 |
| G0:000509 | GDP-dissoc | 15  | 0.6221257 | 1.4485261 | 0.0334572 | 0.18636   | 0.1539286 |
| G0:000531 | dicarboxyl | 37  | -0.421906 | -1.51119  | 0.0347826 | 0.1925837 | 0.1590692 |
| G0:003293 | sterol bir | 55  | -0.369172 | -1.386238 | 0.0348837 | 0.1925837 | 0.1590692 |
| G0:007003 | telomerase | 21  | 0.5820996 | 1.4579638 | 0.0348977 | 0.1925837 | 0.1590692 |
| G0:003027 | clathrin b | 54  | 0.4764296 | 1.3773015 | 0.0351648 | 0.1929219 | 0.1593485 |
| G0:004228 | MHC class  | 16  | 0.6103046 | 1.4477622 | 0.0352798 | 0.1929219 | 0.1593485 |
| G0:001513 | sialic aci | 8   | -0.702946 | -1.65986  | 0.0355556 | 0.1929219 | 0.1593485 |
| G0:000470 | NF-kappaB- | 6   | 0.7542695 | 1.4147539 | 0.0355731 | 0.1929219 | 0.1593485 |

|                        |     |           |           |           |           |           |
|------------------------|-----|-----------|-----------|-----------|-----------|-----------|
| GO:0042289MHC class    | 6   | 0.7554619 | 1.4169905 | 0.0355731 | 0.1929219 | 0.1593485 |
| GO:0004036aldo-keto    | 23  | -0.455726 | -1.461582 | 0.0357143 | 0.1929219 | 0.1593485 |
| GO:0004252serine-tyr   | 141 | -0.434789 | -1.927742 | 0.0357143 | 0.1929219 | 0.1593485 |
| GO:0015095magnesium    | 14  | 0.6293325 | 1.4444426 | 0.0358911 | 0.193293  | 0.159655  |
| GO:0051721protein ph   | 31  | 0.5351205 | 1.4226563 | 0.0361305 | 0.1939982 | 0.1602375 |
| GO:0043531ADP bindir   | 35  | 0.5286882 | 1.4318469 | 0.036405  | 0.1948867 | 0.1609714 |
| GO:0004364glutathior   | 24  | -0.45313  | -1.460122 | 0.0368098 | 0.1964655 | 0.1622755 |
| GO:0008436selenium k   | 6   | -0.797286 | -1.680706 | 0.037037  | 0.196961  | 0.1626848 |
| GO:0035255ionotropic   | 30  | 0.5371636 | 1.4301384 | 0.037123  | 0.196961  | 0.1626848 |
| GO:0005504fatty acid   | 33  | -0.422333 | -1.473054 | 0.0384615 | 0.201912  | 0.1667741 |
| GO:0005506iron ion k   | 143 | -0.590041 | -2.608288 | 0.0384615 | 0.201912  | 0.1667741 |
| GO:0016289CoA hydrol   | 20  | -0.50288  | -1.526113 | 0.0384615 | 0.201912  | 0.1667741 |
| GO:0051861glycolipic   | 21  | 0.575241  | 1.4407851 | 0.0385078 | 0.201912  | 0.1667741 |
| GO:0004298threonine-   | 19  | 0.5880227 | 1.4390689 | 0.0387879 | 0.2021945 | 0.1670075 |
| GO:0070005threonine-   | 19  | 0.5880227 | 1.4390689 | 0.0387879 | 0.2021945 | 0.1670075 |
| GO:0035326enhancer k   | 126 | 0.4091577 | 1.2921621 | 0.0392157 | 0.2038304 | 0.1683587 |
| GO:0031545peptidyl-p   | 12  | 0.6398248 | 1.4137161 | 0.0403531 | 0.2085834 | 0.1722845 |
| GO:0070405ammonium i   | 66  | -0.341686 | -1.338068 | 0.0405405 | 0.2085834 | 0.1722845 |
| GO:0016796exonucleas   | 54  | 0.4730913 | 1.3676508 | 0.0406593 | 0.2085834 | 0.1722845 |
| GO:0019787ubiquitin-   | 384 | 0.351879  | 1.181703  | 0.041     | 0.2085834 | 0.1722845 |
| GO:0048035ubiquinone   | 6   | -0.791534 | -1.668581 | 0.0411523 | 0.2085834 | 0.1722845 |
| GO:0017045GTP-Rho bi   | 20  | 0.5791172 | 1.4308465 | 0.0414634 | 0.2085834 | 0.1722845 |
| GO:0005534galactose    | 5   | 0.7899932 | 1.4164781 | 0.0414993 | 0.2085834 | 0.1722845 |
| GO:0031694alpha-2A a   | 5   | 0.7903282 | 1.417079  | 0.0414993 | 0.2085834 | 0.1722845 |
| GO:0005342organic ac   | 145 | -0.475692 | -2.086355 | 0.0416667 | 0.2085834 | 0.1722845 |
| GO:0015081sodium ion   | 145 | -0.357864 | -1.569567 | 0.0416667 | 0.2085834 | 0.1722845 |
| GO:0016705oxidoreduc   | 145 | -0.598862 | -2.626568 | 0.0416667 | 0.2085834 | 0.1722845 |
| GO:0016885ligase act   | 7   | -0.752774 | -1.715442 | 0.0416667 | 0.2085834 | 0.1722845 |
| GO:0046945carboxylic   | 145 | -0.475692 | -2.086355 | 0.0416667 | 0.2085834 | 0.1722845 |
| GO:0015301anion:anic   | 30  | 0.530574  | 1.4125943 | 0.0417633 | 0.2085834 | 0.1722845 |
| GO:0032356oxidized I   | 9   | 0.6798399 | 1.411705  | 0.0422535 | 0.2098592 | 0.1733383 |
| GO:0032357oxidized p   | 9   | 0.6798399 | 1.411705  | 0.0422535 | 0.2098592 | 0.1733383 |
| GO:0017065snRNA bind   | 37  | 0.515956  | 1.4119514 | 0.042841  | 0.2121877 | 0.1752616 |
| GO:0031005filamin bi   | 10  | 0.669232  | 1.4151871 | 0.0434227 | 0.2144747 | 0.1771506 |
| GO:0003733mRNA 3'-UT   | 86  | 0.4345576 | 1.3322423 | 0.0439331 | 0.2163975 | 0.1787388 |
| GO:0019825cation-tra   | 50  | 0.483842  | 1.3867189 | 0.0441989 | 0.2171089 | 0.1793263 |
| GO:0004985neuropepti   | 8   | -0.673653 | -1.59069  | 0.0444444 | 0.217122  | 0.1793372 |
| GO:0016742hydroxymet   | 8   | -0.677685 | -1.600211 | 0.0444444 | 0.217122  | 0.1793372 |
| GO:0008376acetylgalect | 43  | 0.4936785 | 1.383081  | 0.044843  | 0.2184347 | 0.1804214 |
| GO:0051011microtubul   | 17  | 0.5901582 | 1.4183377 | 0.0449575 | 0.2184347 | 0.1804214 |
| GO:0016595glutamate    | 10  | -0.614895 | -1.540669 | 0.0456621 | 0.221257  | 0.1827526 |
| GO:0043522leucine zi   | 10  | 0.6661328 | 1.4086335 | 0.045977  | 0.222046  | 0.1834043 |
| GO:0005255anion char   | 85  | 0.4320949 | 1.3219292 | 0.0460733 | 0.222046  | 0.1834043 |
| GO:0016891endoribont   | 25  | 0.5406741 | 1.3963175 | 0.0463734 | 0.2228913 | 0.1841025 |
| GO:0015175L-amino ac   | 51  | 0.4791877 | 1.3769437 | 0.0473568 | 0.2270081 | 0.1875028 |
| GO:0008417fucosyltra   | 13  | 0.6241537 | 1.4078649 | 0.0475    | 0.2270856 | 0.1875668 |
| GO:0003745translatic   | 47  | 0.4837683 | 1.371939  | 0.0482063 | 0.2285234 | 0.1887545 |
| GO:0003756protein di   | 16  | 0.5958493 | 1.4134715 | 0.0486618 | 0.2285234 | 0.1887545 |
| GO:0016864intramolec   | 16  | 0.5958493 | 1.4134715 | 0.0486618 | 0.2285234 | 0.1887545 |
| GO:0022885serine tra   | 6   | 0.7435948 | 1.3947317 | 0.0487484 | 0.2285234 | 0.1887545 |
| GO:0016796thiolester   | 35  | -0.373013 | -1.319156 | 0.0487805 | 0.2285234 | 0.1887545 |

|                        |     |           |           |           |           |           |
|------------------------|-----|-----------|-----------|-----------|-----------|-----------|
| GO:0031956medium-chain | 8   | -0.669312 | -1.580439 | 0.0488889 | 0.2285234 | 0.1887545 |
| GO:0102391decanoate-   | 8   | -0.669312 | -1.580439 | 0.0488889 | 0.2285234 | 0.1887545 |
| GO:0016504peptidase    | 35  | 0.5113444 | 1.3848747 | 0.0489192 | 0.2285234 | 0.1887545 |
| GO:0003690double-str   | 913 | 0.3296966 | 1.1311593 | 0.048951  | 0.2285234 | 0.1887545 |
| GO:0015288porin acti   | 5   | 0.7844116 | 1.4064702 | 0.0495315 | 0.2306309 | 0.1904952 |
| GO:0032027myosin lig   | 7   | 0.7249282 | 1.4136879 | 0.0498688 | 0.2315983 | 0.1912943 |

| rank | leading_eccore_enricCategory | geneSymbol                               |
|------|------------------------------|------------------------------------------|
| 4298 | tags=39%, 4605/991/GO_BP     | MYBL2/CDC20/BIRC5/PLK1/CCNB1/KIF2C/KIF4  |
| 4980 | tags=47%, 4605/8877/GO_BP    | MYBL2/SPHK1/SFN/CDC20/BIRC5/PLK1/CCNB1/  |
| 5318 | tags=34%, 6696/7345/GO_BP    | SPP1/UCHL1/ALDOA/S100A6/RAP1GAP/LIMK1/M  |
| 6656 | tags=49%, 8877/1001GO_BP     | SPHK1/CD24/S100A9/CRP/LAPTM4B/PAEP/TREM  |
| 6695 | tags=50%, 8877/1001GO_BP     | SPHK1/CD24/CRP/LAPTM4B/PAEP/TREM2/PYCAR  |
| 6206 | tags=46%, 8877/5047/GO_BP    | SPHK1/PAEP/TREM2/PYCARD/CYBA/LY96/MDK/M  |
| 4582 | tags=36%, 768/6692/GO_BP     | CA9/SPINT1/CTHRC1/SOX4/MDK/SOX9/MMP12/T  |
| 5064 | tags=46%, 6286/5315/GO_BP    | S100P/PKM/MMP9/S100A9/S100A11/CXCL1/ALD  |
| 4258 | tags=43%, 6286/5315/GO_BP    | S100P/PKM/SPHK1/MMP9/S100A9/S100A11/CXC  |
| 4258 | tags=45%, 6286/5315/GO_BP    | S100P/PKM/MMP9/S100A9/S100A11/CXCL1/ALD  |
| 4258 | tags=46%, 6286/5315/GO_BP    | S100P/PKM/MMP9/S100A9/S100A11/CXCL1/ALD  |
| 5064 | tags=46%, 6286/5315/GO_BP    | S100P/PKM/MMP9/S100A9/S100A11/CXCL1/ALD  |
| 4072 | tags=39%, 6286/5315/GO_BP    | S100P/PKM/MMP9/S100A9/S100A11/CRP/CXCL1  |
| 4258 | tags=46%, 6286/5315/GO_BP    | S100P/PKM/MMP9/S100A9/S100A11/CXCL1/ALD  |
| 6206 | tags=44%, 2539/4318/GO_BP    | G6PD/MMP9/TESC/TREM2/CCNB2/UBD/SOX4/MDK  |
| 6267 | tags=45%, 4318/54997GO_BP    | MMP9/TESC/TREM2/UBD/SOX4/MDK/ANXA2/FCER  |
| 5207 | tags=41%, 100133941/GO_BP    | CD24/TESC/S100A9/CCL20/MUC13/CRP/TREM2/  |
| 6128 | tags=53%, 6280/56667GO_BP    | S100A9/MUC13/CYBA/LIMK1/LY96/TNFRSF21/I  |
| 6475 | tags=55%, 100133941/GO_BP    | CD24/MUC13/LIMK1/TNFRSF21/FCER1G/ARPC1B  |
| 6454 | tags=51%, 8877/6282/GO_BP    | SPHK1/S100A11/PTTG1/HMGA1/CDT1/PKIB/AUR  |
| 6444 | tags=52%, 9232/3159/GO_BP    | PTTG1/HMGA1/UBE2T/FOXO1/TRIP13/CDCA5/RE  |
| 6885 | tags=50%, 891/79019/GO_BP    | CCNB1/CENPM/HMGA1/AURKB/CENPA/SOX9/ASF1  |
| 7311 | tags=61%, 891/3958/GO_BP     | CCNB1/LGALS3/RPP25/TGFB1/BOP1/RBM38/DDX  |
| 6706 | tags=56%, 5997/6659/GO_BP    | RGS2/SOX4/RPL39L/GAPDH/IGF2BP2/TYMS/KRT  |
| 4233 | tags=38%, 6286/5315/GO_BP    | S100P/PKM/MMP9/S100A9/S100A11/CXCL1/ALD  |
| 3729 | tags=30%, 6280/6364/GO_BP    | S100A9/CCL20/CXCL1/RAP1GAP/TREM2/CXCL6/I |
| 6444 | tags=51%, 2810/1123GO_BP     | SFN/EGLN3/PLK1/CCNB1/PTTG1/HMGA1/PYCARD  |
| 4298 | tags=37%, 4605/991/GO_BP     | MYBL2/CDC20/UCHL1/BIRC5/PLK1/CCNB1/KIF2  |
| 4980 | tags=46%, 8877/2810/GO_BP    | SPHK1/SFN/CDC20/PLK1/CCNB1/PTTG1/ASNS/C  |
| 4023 | tags=31%, 8877/4318/GO_BP    | SPHK1/MMP9/CDC20/CD24/BIRC5/CCNB1/S100A  |
| 7528 | tags=66%, 3958/55544GO_BP    | LGALS3/RBM38/DDX39A/SNRPB/SF3B4/ALYREF/  |
| 6823 | tags=49%, 991/7345/GO_BP     | CDC20/UCHL1/PLK1/CCNB1/PTTG1/TREM2/KCTD  |
| 4993 | tags=45%, 8877/2810/GO_BP    | SPHK1/SFN/CDC20/PLK1/CCNB1/PTTG1/CDT1/U  |
| 5809 | tags=45%, 8877/4318/GO_BP    | SPHK1/MMP9/SFN/CCNB1/TREM2/KCTD17/CDT1/  |
| 5592 | tags=44%, 4605/4318/GO_BP    | MYBL2/MMP9/SFN/S100A9/EGLN3/NQO1/PYCARD  |
| 6315 | tags=58%, 10053/651GO_BP     | AP1M2/SLC1A5/HMGA1/KRT19/CENPA/CXCL8/SL  |
| 7272 | tags=63%, 891/1869/GO_BP     | CCNB1/E2F1/LGALS3/IGF2BP2/YWHAZ/FLNA/RB  |
| 7115 | tags=52%, 891/9212/GO_BP     | CCNB1/AURKB/CDK1/CCNA2/LIF/TGFB1/AURKA/  |
| 5327 | tags=45%, 8877/4318/GO_BP    | SPHK1/MMP9/CD24/CCL20/BIRC5/CXCL1/TREM2  |
| 5981 | tags=48%, 4318/4316/GO_BP    | MMP9/MMP7/PLK1/CCNB1/KIF2C/HMGA1/TREM2/  |
| 7442 | tags=71%, 54913/2324GO_BP    | RPP25/BOP1/SNRPB/DCAF13/EXOSC4/NOP56/SN  |
| 5429 | tags=41%, 2919/226/GO_BP     | CXCL1/ALDOA/KRT19/TMSB10/CAPG/PYCARD/LI  |
| 6243 | tags=46%, 5347/79574GO_BP    | PLK1/EPS8L3/RAP1GAP/KCTD17/TUBA4A/CDK1/  |
| 5429 | tags=42%, 2919/226/GO_BP     | CXCL1/ALDOA/KRT19/TMSB10/CAPG/PYCARD/LI  |
| 6206 | tags=43%, 2539/4318/GO_BP    | G6PD/MMP9/TESC/TREM2/UBD/SOX4/MDK/TOP2A  |
| 5724 | tags=42%, 2539/4318/GO_BP    | G6PD/MMP9/TESC/TREM2/UBD/EPO/ANXA2/FCER  |
| 3727 | tags=34%, 100133941/GO_BP    | CD24/TESC/AGR2/PYCARD/MDK/CXCL8/TNFRSF2  |
| 6823 | tags=47%, 991/7345/GO_BP     | CDC20/UCHL1/PLK1/CCNB1/PTTG1/LPCAT1/LAP  |
| 3729 | tags=30%, 8877/4318/GO_BP    | SPHK1/MMP9/CCL20/PHLDA2/TMSB10/TREM2/PY  |
| 5313 | tags=35%, 6696/991/GO_BP     | SPP1/CDC20/S100A9/UCHL1/S100A6/RAP1GAP/  |

|                |                 |                                          |
|----------------|-----------------|------------------------------------------|
| 6247 tags=45%, | 6696/991/€GO_BP | SPP1/CDC20/S100A9/EPS8L3/RAP1GAP/TREM2/  |
| 8345 tags=58%, | 8877/991/€GO_BP | SPHK1/CDC20/PLK1/UBD/LIMK1/UBE2T/SOX4/U  |
| 5036 tags=37%, | 2810/10551GO_BP | SFN/AGR2/PLK1/CRP/PAEP/TREM2/CDT1/PYC    |
| 6199 tags=49%, | 2810/5347/GO_BP | SFN/PLK1/CDT1/AURKB/CENPA/E2F1/CDCA5/SO  |
| 6277 tags=50%, | 79019/916€GO_BP | CENPM/TMSB10/CDT1/CAPG/PYCARD/CYBA/CENP  |
| 6225 tags=54%, | 5315/80201GO_BP | PKM/HKDC1/ALDOA/ENO2/PFKP/E2F1/ENO1/SLC  |
| 7468 tags=65%, | 54913/2324GO_BP | RPP25/BOP1/LAGE3/HRAS/DCAF13/PUSL1/EEF1  |
| 4258 tags=46%, | 6286/5315/GO_BP | S100P/PKM/MMP9/S100A9/S100A11/CXCL1/ALD  |
| 3774 tags=29%, | 8877/4318/GO_BP | SPHK1/MMP9/CCL20/PHLDA2/TMSB10/TREM2/PY  |
| 4982 tags=38%, | 8877/4318/GO_BP | SPHK1/MMP9/CCL20/TREM2/PYCARD/MDK/CXCL8  |
| 5381 tags=43%, | 100133941/GO_BP | CD24/PYCARD/SOX4/MDK/TNFRSF21/EPO/FCER1  |
| 4258 tags=46%, | 6286/5315/GO_BP | S100P/PKM/MMP9/S100A9/S100A11/CXCL1/ALD  |
| 3729 tags=30%, | 6280/6364/GO_BP | S100A9/CCL20/CXCL1/RAP1GAP/TREM2/CXCL6/  |
| 6706 tags=55%, | 5997/6659/GO_BP | RGS2/SOX4/RPL39L/GAPDH/IGF2BP2/TYMS/KRT  |
| 5483 tags=44%, | 4605/4318/GO_BP | MYBL2/MMP9/SFN/S100A9/EGLN3/NQO1/PYC     |
| 4096 tags=31%, | 8877/4318/GO_BP | SPHK1/MMP9/SFN/BIRC5/NQO1/PLK1/TREM2/AS  |
| 5483 tags=44%, | 4605/4318/GO_BP | MYBL2/MMP9/SFN/S100A9/EGLN3/NQO1/PYC     |
| 4829 tags=35%, | 8877/4318/GO_BP | SPHK1/MMP9/SFN/BIRC5/NQO1/PLK1/TREM2/AS  |
| 6823 tags=49%, | 991/7345/€GO_BP | CDC20/UHL1/PLK1/CCNB1/PTTG1/KCTD17/AUR   |
| 6249 tags=45%, | 8877/5347/GO_BP | SPHK1/PLK1/EPS8L3/TMSB10/RAP1GAP/KCTD17  |
| 5933 tags=45%, | 79574/797€GO_BP | EPS8L3/KCTD17/CDT1/PYCARD/LIMK1/SOX9/IC  |
| 6315 tags=57%, | 10053/651CGO_BP | AP1M2/SLC1A5/HMGA1/KRT19/CXCL6/CENPA/CX  |
| 6315 tags=56%, | 10053/651CGO_BP | AP1M2/SLC1A5/S100A9/HMGA1/KRT19/CXCL6/C  |
| 4335 tags=26%, | 6696/6690/GO_BP | SPP1/SPINK1/CLDN4/MMP9/MMP7/PLK1/CCNB1/  |
| 5809 tags=56%, | 2810/991/€GO_BP | SFN/CDC20/PLK1/CCNB1/CCNB2/CDT1/UBD/AUR  |
| 4233 tags=40%, | 6286/5315/GO_BP | S100P/PKM/MMP9/S100A9/S100A11/CXCL1/ALD  |
| 6062 tags=45%, | 6280/6364/GO_BP | S100A9/CCL20/MUC13/CRP/APOA4/TREM2/PYCA  |
| 6156 tags=48%, | 6280/56667GO_BP | S100A9/MUC13/TREM2/PYCARD/CYBA/LY96/MMP  |
| 5182 tags=35%, | 2810/1001€GO_BP | SFN/CD24/TESC/SPINT1/S100A9/TREM2/CTHRC  |
| 4835 tags=43%, | 2810/991/€GO_BP | SFN/CDC20/PLK1/CCNB1/PTTG1/CDT1/AURKB/F  |
| 6306 tags=46%, | 2810/1001€GO_BP | SFN/CD24/TESC/UHL1/PLK1/CCNB1/CCNB2/PY   |
| 6206 tags=48%, | 100133941/GO_BP | CD24/IMPDH1/PYCARD/SOX4/MDK/TNFRSF21/EPO |
| 3955 tags=37%, | 4605/8877/GO_BP | MYBL2/SPHK1/CDC20/BIRC5/PLK1/CCNB1/PTTG  |
| 6206 tags=43%, | 2539/4318/GO_BP | G6PD/MMP9/TESC/TREM2/CCNB2/UBD/SOX4/MDK  |
| 4588 tags=33%, | 768/6692/€GO_BP | CA9/SPINT1/GCNT3/CTHRC1/SOX4/MDK/SOX9/M  |
| 5383 tags=42%, | 8877/1001€GO_BP | SPHK1/CD24/TREM2/PYCARD/MDK/TNFRSF21/EPO |
| 3442 tags=37%, | 9123/6280/GO_BP | SLC16A3/S100A9/CCL20/CXCL1/TREM2/PYC     |
| 6427 tags=49%, | 6696/991/€GO_BP | SPP1/CDC20/PLK1/CCNB1/PTTG1/APOA4/HMGA1  |
| 3743 tags=29%, | 8877/4318/GO_BP | SPHK1/MMP9/CCL20/PHLDA2/TMSB10/TREM2/PY  |
| 4418 tags=36%, | 8877/4318/GO_BP | SPHK1/MMP9/CCL20/TREM2/PYCARD/MDK/CXCL8  |
| 6225 tags=46%, | 2810/991/1GO_BP | SFN/CDC20/CD24/TESC/UHL1/PLK1/CCNB1/CC   |
| 5207 tags=39%, | 6280/6364/GO_BP | S100A9/CCL20/EGLN3/APOA4/RAP1GAP/PYC     |
| 4258 tags=40%, | 6280/5347/GO_BP | S100A9/PLK1/TMSB10/CAPG/PYCARD/LIMK1/TP  |
| 6259 tags=48%, | 10053/734€GO_BP | AP1M2/UHL1/PLK1/CCNB1/KIF2C/CDT1/CENPA   |
| 6249 tags=46%, | 10053/734€GO_BP | AP1M2/UHL1/PLK1/CCNB1/KIF2C/CDT1/CENPA   |
| 4326 tags=28%, | 6696/991/€GO_BP | SPP1/CDC20/SPINT1/S100A9/TREM2/LIMK1/RG  |
| 4291 tags=29%, | 991/6692/€GO_BP | CDC20/SPINT1/S100A9/TREM2/LIMK1/RGS2/MD  |
| 4383 tags=29%, | 6696/2539/GO_BP | SPP1/G6PD/CDC20/SPINT1/S100A9/PAEP/TREM  |
| 6214 tags=46%, | 2810/10551GO_BP | SFN/AGR2/PLK1/TREM2/CDT1/CYBA/E2F1/CDCA  |
| 4096 tags=31%, | 8877/4318/GO_BP | SPHK1/MMP9/SFN/BIRC5/AGR2/NQO1/PLK1/PYC  |
| 6379 tags=50%, | 8877/2810/GO_BP | SPHK1/SFN/CD24/PLK1/CCNB1/LAPTM4B/TREM2  |

|                |                 |                                         |
|----------------|-----------------|-----------------------------------------|
| 7323 tags=50%, | 8877/991/7GO_BP | SPHK1/CDC20/UCHL1/PLK1/UBD/LIMK1/UBE2T/ |
| 7508 tags=53%, | 4605/991/3GO_BP | MYBL2/CDC20/BIRC5/PLK1/KRT19/KCTD17/KIF |
| 6345 tags=51%, | 2810/10013GO_BP | SFN/CD24/TESC/AGR2/TREM2/ATP1B3/E2F1/AN |
| 4835 tags=37%, | 6696/8877/GO_BP | SPP1/SPHK1/AGR2/HMGA1/PYCR1/HSPB8/PYCAR |
| 4258 tags=36%, | 11004/226/GO_BP | KIF2C/ALDOA/KRT19/TMSB10/CAPG/PYCARD/LI |
| 3723 tags=28%, | 1364/10013GO_BP | CLDN4/CD24/S100A9/S100A11/APOA4/PYCARD/ |
| 6243 tags=45%, | 5347/79574GO_BP | PLK1/EP8L3/RAP1GAP/KCTD17/TUBA4A/CDK1/  |
| 6247 tags=45%, | 6696/991/6GO_BP | SPP1/CDC20/S100A9/EP8L3/RAP1GAP/TREM2/  |
| 4102 tags=45%, | 2810/991/5GO_BP | SFN/CDC20/PLK1/CCNB1/CDT1/UBD/AURKB/TPX |
| 4980 tags=49%, | 4605/8877/GO_BP | MYBL2/SPHK1/SFN/CDC20/BIRC5/PLK1/CCNB1/ |
| 7272 tags=53%, | 54997/542CGO_BP | TESC/TREM2/MDK/LGALS9/FOXJ1/LGALS3/MMP1 |
| 4298 tags=37%, | 2810/10551GO_BP | SFN/AGR2/PLK1/TREM2/CDT1/E2F1/CDCA5/CDK |
| 3743 tags=30%, | 8877/4318/GO_BP | SPHK1/MMP9/CCL20/PHLDA2/TMSB10/TREM2/PY |
| 4418 tags=36%, | 8877/4318/GO_BP | SPHK1/MMP9/CCL20/TREM2/PYCARD/MDK/CXCL8 |
| 7311 tags=64%, | 10212/6628GO_BP | DDX39A/SNRPB/SF3B4/ALYREF/RALY/SNRPD2/S |
| 7311 tags=64%, | 10212/6628GO_BP | DDX39A/SNRPB/SF3B4/ALYREF/RALY/SNRPD2/S |
| 7311 tags=64%, | 10212/6628GO_BP | DDX39A/SNRPB/SF3B4/ALYREF/RALY/SNRPD2/S |
| 4796 tags=42%, | 768/5315/1GO_BP | CA9/PKM/CD24/EGLN3/CCNB1/CYBA/E2F1/SLC2 |
| 4258 tags=45%, | 6286/5315/GO_BP | S100P/PKM/MMP9/S100A9/S100A11/CXCL1/ALD |
| 5383 tags=44%, | 8877/10013GO_BP | SPHK1/CD24/TREM2/PYCARD/MDK/TNFRSF21/EP |
| 6100 tags=50%, | 100133941/GO_BP | CD24/S100A9/MUC13/CYBA/LIMK1/LY96/TNFRS |
| 7311 tags=61%, | 891/3958/5GO_BP | CCNB1/LGALS3/RBM38/DDX39A/SNRPB/SF3B4/A |
| 6199 tags=51%, | 2810/4321/GO_BP | SFN/MMP12/KPNA2/ECT2/TGFB1/FLNA/DDX39A/ |
| 3723 tags=37%, | 100133941/GO_BP | CD24/S100A9/APOA4/PYCARD/MDK/TNFRSF21/E |
| 6278 tags=47%, | 79574/5909GO_BP | EP8L3/RAP1GAP/LIMK1/FOXM1/EPO/STMN1/SH  |
| 6338 tags=50%, | 5997/6659/GO_BP | RGS2/SOX4/E2F1/TGFB1/GAPDH/IGF2BP2/TYMS |
| 3862 tags=42%, | 2810/991/5GO_BP | SFN/CDC20/PLK1/CCNB1/PTTG1/CDT1/AURKB/S |
| 5252 tags=35%, | 6696/991/6GO_BP | SPP1/CDC20/S100A9/LIMK1/RGS2/MDK/EPO/DB |
| 3838 tags=34%, | 6696/4318/GO_BP | SPP1/MMP9/SPINT1/MMP7/SOX9/MMP12/ANXA2/ |
| 3729 tags=32%, | 8877/4318/GO_BP | SPHK1/MMP9/CCL20/TREM2/PYCARD/MDK/CXCL8 |
| 7666 tags=61%, | 11004/3159GO_BP | KIF2C/HMGA1/CAPG/STMN1/SH3BP1/MICAL1/KI |
| 6693 tags=56%, | 991/5347/8GO_BP | CDC20/PLK1/CCNB1/PTTG1/HMGA1/CDT1/PKIB/ |
| 5216 tags=42%, | 9168/8162CGO_BP | TMSB10/CDT1/CAPG/PYCARD/CRYAB/DBN1/HJUR |
| 4258 tags=46%, | 6286/5315/GO_BP | S100P/PKM/MMP9/S100A9/S100A11/CXCL1/ALD |
| 4258 tags=46%, | 6286/5315/GO_BP | S100P/PKM/MMP9/S100A9/S100A11/CXCL1/ALD |
| 4980 tags=50%, | 2810/991/5GO_BP | SFN/CDC20/PLK1/CCNB1/CCNB2/CDT1/UBD/AUR |
| 5055 tags=44%, | 8877/2810/GO_BP | SPHK1/SFN/CCNB1/ASNS/CDT1/AURKB/SOX4/E2 |
| 6199 tags=51%, | 2810/3159/GO_BP | SFN/HMGA1/MMP12/KPNA2/ECT2/TGFB1/FLNA/D |
| 4980 tags=48%, | 2810/991/3GO_BP | SFN/CDC20/BIRC5/PLK1/CCNB1/PTTG1/KIF2C/ |
| 5011 tags=40%, | 2810/10013GO_BP | SFN/CD24/UCHL1/PLK1/CCNB1/CCNB2/PYCARD/ |
| 5704 tags=46%, | 4318/2810/GO_BP | MMP9/SFN/CD24/S100A9/PYCARD/LY96/LCN2/E |
| 5290 tags=44%, | 9168/822/2GO_BP | TMSB10/CAPG/PYCARD/LIMK1/CRYAB/DBN1/ICA |
| 7311 tags=58%, | 891/1869/1GO_BP | CCNB1/E2F1/IGF2BP2/YWHAZ/RBM38/PRKCD/HS |
| 4388 tags=41%, | 2810/10551GO_BP | SFN/AGR2/PLK1/TREM2/CDT1/E2F1/CDK1/NDC8 |
| 4322 tags=34%, | 54997/1055GO_BP | TESC/AGR2/PLK1/TREM2/ATP1B3/ANXA2/FCER1 |
| 4263 tags=40%, | 4605/8877/GO_BP | MYBL2/SPHK1/CDC20/BIRC5/PLK1/CCNB1/PTTG |
| 6128 tags=56%, | 56667/3984GO_BP | MUC13/LIMK1/TNFRSF21/FCER1G/ARPC1B/SRC/ |
| 6225 tags=61%, | 1869/10644GO_BP | E2F1/IGF2BP2/YWHAZ/RNASEH2A/RBM38/FEN1/ |
| 6225 tags=61%, | 1869/10644GO_BP | E2F1/IGF2BP2/YWHAZ/RBM38/PRKCD/HSPB1/SM |
| 4258 tags=36%, | 226/9168/8GO_BP | ALDOA/TMSB10/CAPG/PYCARD/LIMK1/DBN1/ICA |
| 6533 tags=53%, | 991/5347/8GO_BP | CDC20/PLK1/CCNB1/PTTG1/HMGA1/TMSB10/CDT |



|                |                 |                                          |
|----------------|-----------------|------------------------------------------|
| 3723 tags=35%, | 100133941/GO_BP | CD24/PYCARD/MDK/TNFRSF21/EPO/ICAM1/LGAL  |
| 5313 tags=40%, | 6280/79574GO_BP | S100A9/EP8L3/KCTD17/LIMK1/RGS2/LCN2/MD   |
| 5216 tags=41%, | 6696/9168/GO_BP | SPP1/TMSB10/CAPG/PYCARD/LIMK1/DBN1/ICAM  |
| 7468 tags=67%, | 54913/2324GO_BP | RPP25/BOP1/LAGE3/DCAF13/PUSL1/EXOSC4/TS  |
| 4796 tags=43%, | 768/5315/1GO_BP | CA9/PKM/CD24/EGLN3/CCNB1/CYBA/E2F1/SLC2  |
| 6315 tags=50%, | 6690/5047/GO_BP | SPINK1/PAEP/PYCARD/CYBA/CXCL6/LY96/PGC/  |
| 5023 tags=45%, | 100133941/GO_BP | CD24/TREM2/PYCARD/MDK/EPO/CTSC/FCER1G/L  |
| 6100 tags=49%, | 6282/8162GO_BP  | S100A11/CDT1/PKIB/AURKB/FOXM1/CDC6/KPNA  |
| 6656 tags=53%, | 100133941/GO_BP | CD24/PYCARD/MDK/TNFRSF21/EPO/LGALS9/FOX  |
| 4863 tags=40%, | 6696/56667GO_BP | SPP1/MUC13/ALDOA/LPCAT1/PKIB/AURKB/SOX9  |
| 5182 tags=44%, | 768/5315/1GO_BP | CA9/PKM/CD24/EGLN3/CCNB1/CYBA/E2F1/SLC2  |
| 6345 tags=61%, | 2810/1001GO_BP  | SFN/CD24/E2F1/CLSTN1/ITGAM/STX3/YWHAZ/I  |
| 4102 tags=46%, | 2810/991/GO_BP  | SFN/CDC20/PLK1/CCNB1/CDT1/UBD/AURKB/TPX  |
| 5734 tags=48%, | 4318/2810/GO_BP | MMP9/SFN/S100A9/PYCARD/E2F1/EPO/ENO1/CT  |
| 5023 tags=46%, | 100133941/GO_BP | CD24/TREM2/PYCARD/MDK/EPO/CTSC/FCER1G/L  |
| 4835 tags=47%, | 6282/3159/GO_BP | S100A11/HMGA1/CDT1/RRM2/CDC6/RECQL4/CDK  |
| 4661 tags=46%, | 991/332/GO_BP   | CDC20/BIRC5/PLK1/CCNB1/PTTG1/KIF2C/CDT1  |
| 3862 tags=43%, | 2810/991/GO_BP  | SFN/CDC20/PLK1/CCNB1/PTTG1/CDT1/AURKB/S  |
| 3723 tags=36%, | 100133941/GO_BP | CD24/PYCARD/MDK/TNFRSF21/EPO/LGALS9/FOX  |
| 5227 tags=44%, | 9168/822/GO_BP  | TMSB10/CAPG/PYCARD/UBE2S/DBN1/ICAM1/ARP  |
| 3692 tags=35%, | 100133941/GO_BP | CD24/IMPDH1/PYCARD/TNFRSF21/EPO/LGALS9/  |
| 6353 tags=65%, | 54913/2324GO_BP | RPP25/BOP1/DCAF13/EXOSC4/NOP56/RAN/MRTO  |
| 3774 tags=37%, | 6280/6364/GO_BP | S100A9/CCL20/CXCL1/CXCL6/MDK/CXCL8/CXCL  |
| 3692 tags=35%, | 100133941/GO_BP | CD24/IMPDH1/TREM2/PYCARD/TNFRSF21/EPO/L  |
| 3723 tags=36%, | 100133941/GO_BP | CD24/PYCARD/MDK/TNFRSF21/EPO/ICAM1/LGAL  |
| 3703 tags=32%, | 2539/8877/GO_BP | G6PD/SPHK1/MMP9/NQO1/APOA4/PYCR1/CYBA/G  |
| 4950 tags=43%, | 7153/9319/GO_BP | TOP2A/TRIP13/RECQL4/KPNA2/MCM2/CDC45/MCI |
| 6229 tags=43%, | 7345/11004GO_BP | UCHL1/KIF2C/KIF4A/KIF20A/CABYR/DLGAP5/K  |
| 6595 tags=53%, | 222962/10GO_BP  | SLC29A4/IGF2BP2/DDX39A/SMG5/ABCD1/IGF2B  |
| 6353 tags=65%, | 54913/2324GO_BP | RPP25/BOP1/DCAF13/EXOSC4/TCOF1/NOP56/GT  |
| 6181 tags=48%, | 3159/8318/GO_BP | HMGA1/CDC45/TGFB1/NUP62/EZH2/DNMT1/RAN/  |
| 6677 tags=53%, | 332/1627/1GO_BP | BIRC5/DBN1/DNM1/CLSTN1/TYROBP/RCC2/GPC4  |
| 6060 tags=47%, | 27242/578/GO_BP | TNFRSF21/BAK1/FOXJ1/MMP14/TYROBP/TGFB1/  |
| 4151 tags=51%, | 5347/891/GO_BP  | PLK1/CCNB1/CCNB2/AURKB/TPX2/FOXM1/CDC6/  |
| 4863 tags=45%, | 100133941/GO_BP | CD24/PYCARD/MDK/EPO/LGALS9/SRC/MMP14/TY  |
| 5545 tags=48%, | 4318/2810/GO_BP | MMP9/SFN/CD24/S100A9/PYCARD/E2F1/EPO/EN  |
| 3727 tags=39%, | 8877/1401/GO_BP | SPHK1/CRP/TREM2/PYCARD/CYBA/LIMK1/NCF2/  |
| 4826 tags=44%, | 2810/891/GO_BP  | SFN/CCNB1/FOXM1/SOX4/CXCL8/E2F1/CDKN3/C  |
| 6240 tags=69%, | 10053/110GO_BP  | AP1M2/KIF2C/TREM2/PYCARD/CYBA/KIF4A/NCF  |
| 7442 tags=72%, | 23246/662GO_BP  | BOP1/SNRPB/SNRPD2/SNRPD1/MRTO4/SF3A2/RU  |
| 5206 tags=43%, | 81620/291GO_BP  | CDT1/PYCARD/ICAM1/ARPC1B/PFN2/SRC/ARL2/  |
| 4909 tags=47%, | 2810/891/GO_BP  | SFN/CCNB1/CDT1/SOX4/RRM2/E2F1/CDC6/CDKN  |
| 3692 tags=35%, | 100133941/GO_BP | CD24/IMPDH1/PYCARD/TNFRSF21/EPO/LGALS9/  |
| 6117 tags=45%, | 2539/9133/GO_BP | G6PD/CCNB2/CXCL6/SOX9/EPO/FCER1G/LGALS9  |
| 6128 tags=57%, | 27242/915/GO_BP | TNFRSF21/CD3D/LGALS3/RIPK2/ADA/CMTM3/LA  |
| 3955 tags=31%, | 991/5347/GO_BP  | CDC20/PLK1/PTTG1/TOP2A/TRIP13/NUF2/PKMY  |
| 4663 tags=46%, | 2810/891/GO_BP  | SFN/CCNB1/PYCARD/AURKB/TPX2/FOXM1/SOX4/  |
| 5055 tags=48%, | 8877/2810/GO_BP | SPHK1/SFN/CCNB1/CDT1/AURKB/SOX4/E2F1/CD  |
| 3132 tags=39%, | 4605/8877/GO_BP | MYBL2/SPHK1/CDC20/BIRC5/PLK1/CCNB1/PTTG  |
| 4496 tags=39%, | 115908/41GO_BP  | CTHRC1/MDK/SOX9/SULF1/ETV5/DAB2/LIF/SAP  |
| 4759 tags=46%, | 2810/891/GO_BP  | SFN/CCNB1/CDT1/SOX4/RRM2/E2F1/CDC6/CDKN  |

|                |                 |                                         |
|----------------|-----------------|-----------------------------------------|
| 4151 tags=52%, | 5347/891/εGO_BP | PLK1/CCNB1/CCNB2/AURKB/TPX2/FOXMI/CDC6/ |
| 4636 tags=36%, | 4318/54997GO_BP | MMP9/TESC/TREM2/UBD/ANXA2/FCER1G/SRC/LI |
| 5216 tags=45%, | 9168/822/ΣGO_BP | TMSB10/CAPG/PYCARD/DBN1/ICAM1/ARPC1B/PF |
| 6235 tags=71%, | 23636/613ΣGO_BP | NUP62/RPL8/CCL5/NUP210/TRIM11/EIF3B/RPL |
| 3678 tags=36%, | 100133941/GO_BP | CD24/PYCARD/MDK/EPO/ICAM1/LGALS9/SRC/TG |
| 6595 tags=58%, | 10644/1021GO_BP | IGF2BP2/DDX39A/SMG5/IGF2BP1/MVP/NUP62/M |
| 6595 tags=58%, | 10644/1021GO_BP | IGF2BP2/DDX39A/SMG5/IGF2BP1/MVP/NUP62/M |
| 3491 tags=36%, | 100133941/GO_BP | CD24/PYCARD/TNFRSF21/EPO/LGALS9/FOXJ1/L |
| 4832 tags=47%, | 891/79019/GO_BP | CCNB1/CENPM/HMGA1/CENPA/TOP2A/CDCA5/SOX |
| 7442 tags=71%, | 23246/662εGO_BP | BOP1/SNRPB/SNRPD2/SNRPD1/MRT04/SF3A2/RU |
| 2588 tags=34%, | 991/5347/εGO_BP | CDC20/PLK1/CCNB1/PTTG1/KIF2C/CDT1/KIF4A |
| 5290 tags=44%, | 9168/822/ΣGO_BP | TMSB10/CAPG/PYCARD/LIMK1/DBN1/ICAM1/ARP |
| 3862 tags=46%, | 2810/991/εGO_BP | SFN/CDC20/PLK1/CCNB1/CDT1/AURKB/SOX4/TR |
| 4398 tags=43%, | 4318/2810/GO_BP | MMP9/SFN/S100A9/EGLN3/BIRC5/PYCARD/CRYA |
| 4835 tags=43%, | 2305/8870/GO_BP | FOXMI/IER3/RMI2/RAD51/CD44/CD74/PRKCD/R |
| 6595 tags=62%, | 10644/1021GO_BP | IGF2BP2/DDX39A/SMG5/IGF2BP1/MVP/NUP62/C |
| 4972 tags=42%, | 5347/11004GO_BP | PLK1/KIF2C/CENPA/NDC80/SH3BP1/FOXJ1/SPI |
| 3392 tags=36%, | 100133941/GO_BP | CD24/PYCARD/TNFRSF21/EPO/LGALS9/FOXJ1/L |
| 3678 tags=40%, | 100133941/GO_BP | CD24/PYCARD/MDK/EPO/LGALS9/SRC/TGFB1/LG |
| 3862 tags=47%, | 2810/991/εGO_BP | SFN/CDC20/PLK1/CCNB1/CDT1/AURKB/SOX4/TR |
| 3678 tags=40%, | 100133941/GO_BP | CD24/PYCARD/MDK/EPO/ICAM1/LGALS9/SRC/TG |
| 4891 tags=51%, | 2810/991/εGO_BP | SFN/CDC20/PLK1/CCNB1/CDT1/AURKB/SOX4/TO |
| 6767 tags=68%, | 23381/560CGO_BP | SMG5/SMG9/EXOSC4/RPL8/DHX34/MRT04/CNOT1 |
| 6353 tags=65%, | 54913/2324GO_BP | RPP25/BOP1/DCAF13/EXOSC4/NOP56/MRT04/DH |
| 5165 tags=52%, | 8877/1410/GO_BP | SPHK1/CRYAB/CLGN/CD74/HSPB1/PDIA2/CCT5/ |
| 6396 tags=66%, | 3684/3689/GO_BP | ITGAM/ITGB2/ADORA1/PRNP/HRAS/RPL8/NCF1/ |
| 5216 tags=47%, | 9168/822/ΣGO_BP | TMSB10/CAPG/PYCARD/DBN1/ICAM1/ARPC1B/PF |
| 4374 tags=43%, | 4318/2810/GO_BP | MMP9/SFN/S100A9/EGLN3/BIRC5/PYCARD/CRYA |
| 5653 tags=52%, | 6372/3576/GO_BP | CXCL6/CXCL8/TOP2A/ANXA2/KPNA2/LGALS9/LG |
| 4694 tags=42%, | 768/11239εGO_BP | CA9/EGLN3/CCNB1/E2F1/EPO/ENO1/ICAM1/HIL |
| 6260 tags=56%, | 79019/315εGO_BP | CENPM/HMGA1/CDT1/CENPA/SOX9/ASF1B/HJURP |
| 3946 tags=40%, | 6280/6364/GO_BP | S100A9/CCL20/CXCL1/TREM2/CXCL6/MDK/CXCL |
| 4151 tags=55%, | 5347/891/εGO_BP | PLK1/CCNB1/AURKB/TPX2/CDC6/TUBA4A/CDK1/ |
| 2567 tags=41%, | 991/5347/εGO_BP | CDC20/PLK1/CCNB1/PTTG1/KIF2C/CDT1/KIF4A |
| 4936 tags=45%, | 2305/9319/GO_BP | FOXMI/TRIP13/CDCA5/RECQL4/MCM2/CDC45/MC |
| 6187 tags=56%, | 2810/7040/GO_BP | SFN/TGFB1/DDX39A/SMG5/NUP62/GTSE1/ALYRE |
| 4151 tags=56%, | 5347/891/εGO_BP | PLK1/CCNB1/AURKB/TPX2/CDC6/TUBA4A/CDK1/ |
| 3776 tags=36%, | 6280/1123εGO_BP | S100A9/EGLN3/PYCARD/LGALS9/BAK1/MAPK12/ |
| 3729 tags=40%, | 6280/6364/GO_BP | S100A9/CCL20/CXCL1/CXCL6/MDK/CXCL8/CXCL |
| 4298 tags=41%, | 5347/22974GO_BP | PLK1/TPX2/TACC3/NEK2/STMN1/ARL2/CCNF/SK |
| 6128 tags=58%, | 27242/915/GO_BP | TNFRSF21/CD3D/LGALS3/RIPK2/ADA/HLA-DRB1 |
| 6620 tags=58%, | 2810/7040/GO_BP | SFN/TGFB1/DDX39A/SMG5/NUP62/GTSE1/ALYRE |
| 6595 tags=58%, | 10644/1021GO_BP | IGF2BP2/DDX39A/SMG5/IGF2BP1/MVP/NUP62/M |
| 4258 tags=41%, | 29108/3984GO_BP | PYCARD/LIMK1/ICAM1/ARPC1B/PFN2/ARL2/PSR |
| 6079 tags=53%, | 1869/10644GO_BP | E2F1/IGF2BP2/YWHAZ/RBM38/PRKCD/HSPB1/IG |
| 4582 tags=44%, | 115908/41εGO_BP | CTHRC1/MDK/SOX9/SULF1/ETV5/DAB2/LIF/SAP |
| 6217 tags=67%, | 1978/3315/GO_BP | EIF4EBP1/HSPB1/NCK2/RPL8/CCL5/EIF3B/RPL |
| 4298 tags=52%, | 4605/991/εGO_BP | MYBL2/CDC20/BIRC5/PLK1/CCNB1/KIF4A/AURK |
| 2521 tags=12%, | 2810/3880/GO_BP | SFN/KRT19/TGM3/KRT23/DSG2/KRT17/PI3/KRT |
| 4718 tags=60%, | 10053/110CGO_BP | AP1M2/KIF2C/TREM2/PYCARD/CYBA/KIF4A/NCF |
| 4831 tags=45%, | 81620/557CGO_BP | CDT1/PKIB/AURKB/FOXMI/CDK1/NEK2/SRC/RFC |

|                |                 |                                         |
|----------------|-----------------|-----------------------------------------|
| 5225 tags=43%, | 2810/5347/GO_BP | SFN/PLK1/AURKB/MDK/KIF20A/CDC6/VEGFB/CD |
| 4298 tags=46%, | 5347/22974GO_BP | PLK1/TPX2/TACC3/NEK2/STMN1/ARL2/CCNF/SK |
| 3692 tags=37%, | 100133941/GO_BP | CD24/PYCARD/TNFRSF21/EPO/LGALS9/FOXJ1/L |
| 4718 tags=61%, | 10053/110CGO_BP | AP1M2/KIF2C/CYBA/KIF4A/NCF2/FCER1G/KIF2 |
| 6123 tags=44%, | 6696/3984/GO_BP | SPP1/LIMK1/DBN1/SEMA6A/IQGAP3/ARHGAP4/T |
| 4326 tags=39%, | 6692/1159CGO_BP | SPINT1/CTHRC1/SOX4/SOX9/TEAD2/SULF1/SPI |
| 5931 tags=69%, | 10053/110CGO_BP | AP1M2/KIF2C/CYBA/KIF4A/NCF2/FCER1G/KIF2 |
| 6520 tags=64%, | 5347/7277/GO_BP | PLK1/TUBA4A/CDK1/ICAM1/NEK2/STX3/CEP131 |
| 5216 tags=43%, | 9168/822/2GO_BP | TMSB10/CAPG/PYCARD/DBN1/ICAM1/ARPC1B/PF |
| 6229 tags=51%, | 7345/24137GO_BP | UCHL1/KIF4A/TUBA1C/KIF23/TUBA1B/CEP131/ |
| 5216 tags=47%, | 9168/822/2GO_BP | TMSB10/CAPG/PYCARD/DBN1/ICAM1/ARPC1B/PF |
| 6823 tags=62%, | 3984/2207/GO_BP | LIMK1/FCER1G/ARPC1B/SRC/FCGR3A/PRKCD/LA |
| 3692 tags=37%, | 100133941/GO_BP | CD24/PYCARD/TNFRSF21/EPO/LGALS9/FOXJ1/L |
| 6337 tags=56%, | 1869/10644GO_BP | E2F1/IGF2BP2/YWHAZ/RBM38/PRKCD/HSPB1/IG |
| 5435 tags=48%, | 8877/10013GO_BP | SPHK1/CD24/TREM2/PYCARD/MMP12/IKBKE/CSF |
| 5644 tags=54%, | 9212/22974GO_BP | AURKB/TPX2/RMI2/RFC4/AURKA/EXO1/BOP1/CD |
| 6581 tags=55%, | 891/81620/GO_BP | CCNB1/CDT1/PKIB/AURKB/NEK2/DLGAP5/LIF/T |
| 3729 tags=42%, | 6364/54209GO_BP | CCL20/TREM2/PYCARD/MDK/CXCL8/ICAM1/LGAL |
| 5147 tags=50%, | 10551/440/GO_BP | AGR2/ASNS/HSPB8/CXCL8/KDEL3/BAK1/STC2/  |
| 5216 tags=46%, | 9168/822/2GO_BP | TMSB10/CAPG/PYCARD/DBN1/ICAM1/ARPC1B/PF |
| 6235 tags=71%, | 23636/6132GO_BP | NUP62/RPL8/CCL5/NUP210/TRIM11/RPL36A/PO |
| 7545 tags=65%, | 6659/1277/GO_BP | SOX4/COL1A1/SULF1/SRC/DAB2/DEPDC1B/BAMB |
| 6507 tags=54%, | 1535/23643GO_BP | CYBA/LY96/PGC/TOP2A/ANXA2/KPNA2/LGALS9/ |
| 4946 tags=51%, | 79019/8162GO_BP | CENPM/CDT1/CENPA/SOX9/ASF1B/HJURP/MCM2/ |
| 4830 tags=43%, | 8877/5570/GO_BP | SPHK1/PKIB/AURKB/TK1/NEK2/SRC/CENPF/RFC |
| 5759 tags=58%, | 5347/7277/GO_BP | PLK1/TUBA4A/CDK1/NEK2/STX3/CEP131/SNAP2 |
| 3955 tags=36%, | 991/5347/9GO_BP | CDC20/PLK1/PTTG1/TOP2A/TRIP13/NUF2/BUB1 |
| 5701 tags=53%, | 4318/2810/GO_BP | MMP9/SFN/S100A9/PYCARD/E2F1/CTSC/LGALS9 |
| 4928 tags=47%, | 79019/3159GO_BP | CENPM/HMGA1/CENPA/SOX9/HJURP/CENPH/CDKN |
| 5805 tags=60%, | 5570/9212/GO_BP | PKIB/AURKB/RECQL4/NEK2/SRC/CCNE1/RFC4/R |
| 6117 tags=52%, | 8877/54209GO_BP | SPHK1/TREM2/IKBKE/LGALS9/PTP4A3/HAVCR2/ |
| 6337 tags=56%, | 1869/10644GO_BP | E2F1/IGF2BP2/YWHAZ/RBM38/PRKCD/HSPB1/IG |
| 4663 tags=41%, | 2810/10551GO_BP | SFN/AGR2/TREM2/E2F1/ITGA3/ARHGEF16/LYPD |
| 4258 tags=36%, | 5347/8162CGO_BP | PLK1/CDT1/KIF4A/AURKB/CENPA/KIF20A/CEP5 |
| 4936 tags=54%, | 3159/8162CGO_BP | HMGA1/CDT1/CDC6/RECQL4/MCM2/CDC45/GINS1 |
| 3132 tags=35%, | 8877/991/9GO_BP | SPHK1/CDC20/PLK1/CCNB1/PTTG1/CDT1/AURKB |
| 4398 tags=40%, | 6280/11239GO_BP | S100A9/EGLN3/PYCARD/LGALS9/BAK1/RIPK2/E |
| 4486 tags=50%, | 8877/29108GO_BP | SPHK1/PYCARD/TRAIP/GSTP1/TNFRSF12A/BIRC |
| 6454 tags=51%, | 10537/6279GO_BP | UBD/S100A4/IKBKE/LGALS9/ECT2/LGALS1/RIP |
| 4826 tags=44%, | 8877/891/4GO_BP | SPHK1/CCNB1/ASNS/CDT1/CDCA5/CDC6/CDK1/N |
| 6595 tags=59%, | 10644/1021GO_BP | IGF2BP2/DDX39A/SMG5/IGF2BP1/MVP/NUP62/M |
| 3315 tags=35%, | 8877/991/9GO_BP | SPHK1/CDC20/PLK1/CCNB1/PTTG1/CDT1/AURKB |
| 3828 tags=39%, | 2810/891/6GO_BP | SFN/CCNB1/SOX4/E2F1/CDC6/CDK1/CDC45/CCN |
| 2567 tags=45%, | 991/5347/8GO_BP | CDC20/PLK1/CCNB1/PTTG1/KIF2C/CDT1/KIF4A |
| 5805 tags=59%, | 5570/9212/GO_BP | PKIB/AURKB/RECQL4/NEK2/SRC/CCNE1/RFC4/R |
| 4582 tags=49%, | 115908/239GO_BP | CTHRC1/SH3BP1/DAB2/SAPCD2/DKK1/GPC4/GPC |
| 5435 tags=49%, | 8877/10013GO_BP | SPHK1/CD24/TREM2/PYCARD/MMP12/IKBKE/CSF |
| 5216 tags=45%, | 9168/822/2GO_BP | TMSB10/CAPG/PYCARD/DBN1/ICAM1/ARPC1B/PF |
| 4891 tags=51%, | 2810/5347/GO_BP | SFN/PLK1/CCNB1/CDT1/SOX4/TOP2A/E2F1/CDC |
| 6592 tags=61%, | 115908/16CGO_BP | CTHRC1/DAB2/DKK1/GPC4/GPC3/PLCB1/FZD6/F |
| 3078 tags=35%, | 100133941/GO_BP | CD24/PYCARD/TNFRSF21/EPO/LGALS9/FOXJ1/L |

|                |                 |                                         |
|----------------|-----------------|-----------------------------------------|
| 4909 tags=44%, | 2810/891/€GO_BP | SFN/CCNB1/SOX4/E2F1/CDC6/CDK1/CDC45/CCN |
| 5701 tags=56%, | 4318/6280/GO_BP | MMP9/S100A9/PYCARD/EPO/ENO1/SRC/PLAUR/C |
| 3862 tags=48%, | 2810/991/€GO_BP | SFN/CDC20/PLK1/CCNB1/CDT1/AURKB/SOX4/TO |
| 3955 tags=35%, | 991/5347/€GO_BP | CDC20/PLK1/PTTG1/TOP2A/TRIP13/NUF2/BUB1 |
| 5171 tags=52%, | 26353/141€GO_BP | HSPB8/CRYAB/IRAK1/NUP62/HSF1/HMOX1/MAPK |
| 3228 tags=38%, | 100133941/GO_BP | CD24/PYCARD/EPO/LGALS9/RIPK2/ADA/HAVCR2 |
| 6055 tags=55%, | 2810/1869/GO_BP | SFN/E2F1/TSP0/RAC2/YWHAZ/HK2/TOMM40/SLC |
| 4891 tags=49%, | 2810/5347/GO_BP | SFN/PLK1/CCNB1/SOX4/E2F1/CDK1/AURKA/CDC |
| 3228 tags=39%, | 100133941/GO_BP | CD24/PYCARD/EPO/LGALS9/CSF1/RIPK2/ADA/H |
| 3978 tags=46%, | 2810/5347/GO_BP | SFN/PLK1/CCNB1/FOXM1/SOX4/E2F1/CDK1/NDR |
| 3729 tags=38%, | 54209/419€GO_BP | TREM2/MDK/CXCL8/LGALS9/VEGFB/RAC2/CSF1/ |
| 6595 tags=62%, | 10212/233€GO_BP | DDX39A/SMG5/NUP62/ALYREF/RAN/NUP210/NPM |
| 4326 tags=39%, | 6692/1159€GO_BP | SPINT1/CTHRC1/SOX4/SOX9/TEAD2/SPINT2/TG |
| 3946 tags=40%, | 6280/6364/GO_BP | S100A9/CCL20/CXCL1/CXCL6/MDK/CXCL8/CXCL |
| 3851 tags=51%, | 4605/991/€GO_BP | MYBL2/CDC20/BIRC5/PLK1/CCNB1/KIF4A/AURK |
| 4326 tags=41%, | 6692/1159€GO_BP | SPINT1/CTHRC1/SOX4/SOX9/TEAD2/SPINT2/TG |
| 6595 tags=62%, | 10212/233€GO_BP | DDX39A/SMG5/NUP62/ALYREF/RAN/NUP210/NPM |
| 3228 tags=38%, | 100133941/GO_BP | CD24/PYCARD/EPO/LGALS9/CSF1/RIPK2/ADA/H |
| 6396 tags=70%, | 11015/6471GO_BP | KDELR3/PDIA2/RPL8/CHMP4B/GPAA1/SEC61A1/ |
| 6595 tags=62%, | 10212/233€GO_BP | DDX39A/SMG5/NUP62/ALYREF/RAN/NUP210/NPM |
| 5725 tags=53%, | 2810/1869/GO_BP | SFN/E2F1/TSP0/RAC2/YWHAZ/HK2/TOMM40/SLC |
| 5888 tags=54%, | 991/5347/€GO_BP | CDC20/PLK1/CCNB1/PTTG1/HMGA1/CDT1/AURKB |
| 4582 tags=51%, | 115908/16€GO_BP | CTHRC1/DAB2/SAPCD2/DKK1/GPC4/GPC3/FZD6/ |
| 4797 tags=51%, | 6364/5420€GO_BP | CCL20/TREM2/PYCARD/MDK/CXCL8/ICAM1/LGAL |
| 4582 tags=51%, | 115908/16€GO_BP | CTHRC1/DAB2/SAPCD2/DKK1/GPC4/GPC3/FZD6/ |
| 3842 tags=43%, | 9401/4171/GO_BP | RECQL4/MCM2/CDC45/MCM4/RMI2/RAD51/TONSL |
| 4972 tags=44%, | 5347/1058/GO_BP | PLK1/CENPA/NDC80/SH3BP1/FOXJ1/SAPCD2/MI |
| 4832 tags=52%, | 891/79019/GO_BP | CCNB1/CENPM/HMGA1/CENPA/TOP2A/CDCA5/SOX |
| 3842 tags=43%, | 9401/4171/GO_BP | RECQL4/MCM2/CDC45/MCM4/RMI2/RAD51/TONSL |
| 4151 tags=46%, | 768/11239€GO_BP | CA9/EGLN3/EPO/NCK2/MUC1/CREB3L1/CHEK1/R |
| 6754 tags=82%, | 23381/560€GO_BP | SMG5/SMG9/RPL8/DHX34/RPL36A/PPP2R1A/UPF |
| 4151 tags=46%, | 768/11239€GO_BP | CA9/EGLN3/EPO/NCK2/MUC1/CREB3L1/CHEK1/H |
| 3442 tags=39%, | 6280/6364/GO_BP | S100A9/CCL20/CXCL1/CXCL6/MDK/CXCL8/CXCL |
| 6264 tags=55%, | 3159/7153/GO_BP | HMGA1/TOP2A/RECQL4/MCM2/CDC45/GINS1/MCM |
| 6060 tags=53%, | 27242/230€GO_BP | TNFRSF21/FOXJ1/MMP14/TYROBP/TGFB1/ADA/M |
| 3359 tags=38%, | 6280/6364/GO_BP | S100A9/CCL20/CXCL1/CXCL6/MDK/CXCL8/CXCL |
| 4048 tags=40%, | 10551/5347GO_BP | AGR2/PLK1/TREM2/ITGA3/ARHGEF16/LYPD1/LG |
| 6595 tags=61%, | 10212/233€GO_BP | DDX39A/SMG5/NUP62/ALYREF/NUP210/UPF3B/N |
| 4127 tags=47%, | 11004/141€GO_BP | KIF2C/CRYAB/STMN1/KIF18B/ARL2/SKA1/PSRC |
| 6595 tags=61%, | 10212/233€GO_BP | DDX39A/SMG5/NUP62/ALYREF/NUP210/UPF3B/N |
| 6396 tags=78%, | 6132/1288€GO_BP | RPL8/CHMP4B/SEC61A1/RPL36A/SEC61G/RPS2/ |
| 4582 tags=53%, | 115908/16€GO_BP | CTHRC1/DAB2/SAPCD2/DKK1/GPC4/GPC3/FZD6/ |
| 5931 tags=54%, | 56667/2207GO_BP | MUC13/FCER1G/SRC/PRKCD/RELB/HRAS/SYK/MU |
| 5070 tags=54%, | 79019/315€GO_BP | CENPM/HMGA1/CENPA/SOX9/ASF1B/HJURP/MCM2 |
| 4832 tags=50%, | 79019/315€GO_BP | CENPM/HMGA1/CENPA/SOX9/ASF1B/HJURP/MCM2 |
| 3828 tags=43%, | 2810/891/€GO_BP | SFN/CCNB1/SOX4/E2F1/CDK1/AURKA/GPNMB/CD |
| 6228 tags=57%, | 6282/8162€GO_BP | S100A11/CDT1/CDC6/CDK1/CCNA2/RFC4/DSCC1 |
| 4298 tags=57%, | 4605/991/€GO_BP | MYBL2/CDC20/BIRC5/PLK1/CCNB1/KIF4A/AURK |
| 3978 tags=45%, | 2810/891/€GO_BP | SFN/CCNB1/FOXM1/SOX4/E2F1/CDK1/NDRG1/AU |
| 4151 tags=44%, | 56667/2207GO_BP | MUC13/FCER1G/SRC/PRKCD/RELB/HRAS/SYK/MU |
| 6396 tags=80%, | 6132/1288€GO_BP | RPL8/CHMP4B/SEC61A1/RPL36A/SEC61G/RPS2/ |

|                |                 |                                          |
|----------------|-----------------|------------------------------------------|
| 4582 tags=53%, | 115908/16CGO_BP | CTHRC1/DAB2/DKK1/GPC4/GPC3/FZD6/FZD7/PSI |
| 4825 tags=48%, | 2810/891/2GO_BP | SFN/CCNB1/FOXN1/SOX4/E2F1/CDK1/TGFB1/AU  |
| 4662 tags=63%, | 10053/110CGO_BP | AP1M2/KIF2C/TREM2/PYCARD/KIF4A/FCER1G/K  |
| 2362 tags=37%, | 2207/3691/GO_BP | FCER1G/ITGB4/SRC/TIMP1/ITGA3/TYROBP/ITG  |
| 2906 tags=37%, | 6280/6364/GO_BP | S100A9/CCL20/CXCL1/CXCL6/MDK/CXCL8/CXCL  |
| 3828 tags=45%, | 2810/891/6GO_BP | SFN/CCNB1/SOX4/TOP2A/E2F1/CDC6/CDK1/ORC  |
| 4263 tags=51%, | 4605/991/3GO_BP | MYBL2/CDC20/BIRC5/PLK1/KIF4A/AURKB/TPX2  |
| 2848 tags=43%, | 991/5347/8GO_BP | CDC20/PLK1/CCNB1/PTTG1/KIF2C/CDT1/AURKB  |
| 3828 tags=42%, | 2810/891/6GO_BP | SFN/CCNB1/SOX4/E2F1/CDK1/AURKA/GPNMB/CD  |
| 4662 tags=63%, | 10053/110CGO_BP | AP1M2/KIF2C/TREM2/PYCARD/KIF4A/FCER1G/K  |
| 6396 tags=81%, | 6132/6746/GO_BP | RPL8/SSR2/SEC61A1/RPL36A/RPS2/RPL17/RPL  |
| 4274 tags=44%, | 6692/1159CGO_BP | SPINT1/CTHRC1/TEAD2/SPINT2/TGFB1/FOLR1/  |
| 4662 tags=62%, | 10053/110CGO_BP | AP1M2/KIF2C/KIF4A/FCER1G/KIF23/CTSV/HLA  |
| 6055 tags=55%, | 706/5880/1GO_BP | TSP0/RAC2/TOMM40/SLC25A6/MICAL2/SAE1/T   |
| 4151 tags=53%, | 5347/9212/GO_BP | PLK1/AURKB/CDC6/CDK1/ORC1/AURKA/DTL/CHE  |
| 2720 tags=33%, | 2810/5347/GO_BP | SFN/PLK1/CCNB1/CCNB2/CDC6/CDKN3/PKMYT1/  |
| 6396 tags=68%, | 1978/25946GO_BP | EIF4EBP1/ZNF385A/RPL8/YBX3/DPH2/EIF3B/R  |
| 6240 tags=66%, | 1535/4688/GO_BP | CYBA/NCF2/FCER1G/CYBB/ITGAV/TAP1/NCF4/I  |
| 6396 tags=83%, | 6132/29927GO_BP | RPL8/SEC61A1/RPL36A/RPS2/RPL17/RPLP2/TR  |
| 3725 tags=39%, | 29108/3383GO_BP | PYCARD/ICAM1/ARPC1B/PFN2/CORO1A/NCK2/BA  |
| 5888 tags=63%, | 5347/7277/GO_BP | PLK1/TUBA4A/CDK1/NEK2/CEP131/TUBG1/MAPR  |
| 2720 tags=33%, | 2810/5347/GO_BP | SFN/PLK1/CCNB1/CCNB2/CDC6/CDKN3/PKMYT1/  |
| 3226 tags=43%, | 100133941/GO_BP | CD24/PYCARD/EPO/LGALS9/RIPK2/HAVCR2/COR  |
| 3954 tags=44%, | 1535/4688/GO_BP | CYBA/NCF2/VEGFB/SULF1/SRC/CYBB/HSPB1/NC  |
| 6676 tags=61%, | 4318/10551GO_BP | MMP9/AGR2/PLAUR/RHBDF2/NCK2/ADORA1/SHKB  |
| 5055 tags=55%, | 891/81620/GO_BP | CCNB1/CDT1/CDCA5/CDC6/CDK1/CDC45/DLGAP5  |
| 3491 tags=33%, | 27242/7305GO_BP | TNFRSF21/TYROBP/ADA/MZB1/CLCF1/CD74/PKN  |
| 3828 tags=43%, | 2810/891/6GO_BP | SFN/CCNB1/SOX4/E2F1/CDK1/AURKA/CDC25C/G  |
| 4075 tags=45%, | 4318/2810/GO_BP | MMP9/SFN/BIRC5/CRYAB/MICAL1/SRC/PLAUR/B  |
| 4193 tags=44%, | 4318/2056/GO_BP | MMP9/EPO/ENO1/SRC/PLAUR/CD44/CD74/ARHGE  |
| 3729 tags=37%, | 9133/6372/GO_BP | CCNB2/CXCL6/FCER1G/LGALS9/BAK1/TGFB1/AD  |
| 5199 tags=55%, | 23423/110CGO_BP | TMED3/KIF2C/KIF4A/KDEL3/KIF23/RACGAP1/I  |
| 4938 tags=49%, | 4318/10095GO_BP | MMP9/ARPC1B/SRC/DNM1/EFNA3/NCK2/EFNA4/H  |
| 1603 tags=33%, | 991/5347/8GO_BP | CDC20/PLK1/CCNB1/PTTG1/CDT1/AURKB/TACC3  |
| 5808 tags=65%, | 9212/990/9GO_BP | AURKB/CDC6/CDK1/ORC1/AURKA/PSMB9/PSMD14  |
| 2251 tags=36%, | 4318/4316/GO_BP | MMP9/MMP7/MMP12/TIMP1/MMP11/MMP14/MELTF  |
| 5764 tags=69%, | 991/5347/8GO_BP | CDC20/PLK1/CCNB1/PTTG1/AURKB/UBE2S/CDK1  |
| 2518 tags=41%, | 991/5347/8GO_BP | CDC20/PLK1/CCNB1/PTTG1/CDT1/AURKB/TACC3  |
| 4825 tags=53%, | 2810/891/6GO_BP | SFN/CCNB1/SOX4/E2F1/CDK1/TGFB1/AURKA/CD  |
| 4075 tags=46%, | 4318/2810/GO_BP | MMP9/SFN/BIRC5/CRYAB/MICAL1/SRC/PLAUR/B  |
| 5207 tags=64%, | 3984/2207/GO_BP | LIMK1/FCER1G/ARPC1B/SRC/FCGR3A/PRKCD/SY  |
| 5207 tags=62%, | 3984/2207/GO_BP | LIMK1/FCER1G/ARPC1B/SRC/FCGR3A/PRKCD/SY  |
| 2256 tags=25%, | 5347/9232/GO_BP | PLK1/PTTG1/TOP2A/TRIP13/NUF2/BUB1/BUB1B  |
| 4826 tags=55%, | 26353/141CGO_BP | HSPB8/CRYAB/NUP62/HSF1/MAPKAPK2/NUP210/I |
| 6493 tags=61%, | 5570/9212/GO_BP | PKIB/AURKB/NEK2/SRC/RAD51/SMG5/PIF1/CCT  |
| 3385 tags=35%, | 6692/54209GO_BP | SPINT1/TREM2/MDK/E2F1/TSP0/ETV5/LIF/SER  |
| 4832 tags=56%, | 79019/3159GO_BP | CENPM/HMGA1/CENPA/SOX9/ASF1B/HJURP/MCM2  |
| 4258 tags=38%, | 5347/9212/GO_BP | PLK1/AURKB/KIF20A/CDC6/CDC25B/PRC1/KIF2  |
| 3659 tags=45%, | 5347/8162CGO_BP | PLK1/CDT1/AURKB/CENPA/CDCA5/CDK1/NDC80/  |
| 5931 tags=72%, | 1535/4688/GO_BP | CYBA/NCF2/FCER1G/CYBB/ITGAV/TAP1/NCF4/I  |
| 4829 tags=62%, | 81620/4171GO_BP | CDT1/MCM2/CDC45/GINS1/MCM4/RFC4/RAD51/M  |

|                |                 |                                          |
|----------------|-----------------|------------------------------------------|
| 4115 tags=43%, | 891/11004/GO_BP | CCNB1/KIF2C/CDT1/CDCA8/CDCA5/NUF2/NDC80, |
| 2588 tags=32%, | 5347/8162GO_BP  | PLK1/CDT1/KIF4A/AURKB/CENPA/KIF20A/CEP5, |
| 2029 tags=38%, | 2810/5347/GO_BP | SFN/PLK1/CCNB1/SOX4/E2F1/CDK1/AURKA/CDC, |
| 2029 tags=38%, | 2810/5347/GO_BP | SFN/PLK1/CCNB1/SOX4/E2F1/CDK1/AURKA/CDC, |
| 4096 tags=47%, | 891/81620/GO_BP | CCNB1/CDT1/CDCA5/CDC6/CDK1/CDC45/DLGAP5, |
| 5207 tags=64%, | 3984/1009GO_BP  | LIMK1/ARPC1B/SRC/FCGR3A/PRKCD/SYK/HCK/W  |
| 6493 tags=64%, | 5570/9212/GO_BP | PKIB/AURKB/NEK2/SRC/SMG5/PIF1/CCT5/CCT6, |
| 5805 tags=54%, | 5570/9212/GO_BP | PKIB/AURKB/NEK2/SRC/SMG5/PIF1/CCT5/NABP, |
| 5207 tags=64%, | 3984/1009GO_BP  | LIMK1/ARPC1B/SRC/FCGR3A/PRKCD/SYK/HCK/W  |
| 5821 tags=73%, | 23246/511GO_BP  | BOP1/MRT04/PES1/NPM1/RRS1/BRIX1/NOP2/NO  |
| 5377 tags=48%, | 1535/4688/GO_BP | CYBA/NCF2/SH3BGR13/RAC2/TXNRD1/CYBB/QSO, |
| 4115 tags=43%, | 891/11004/GO_BP | CCNB1/KIF2C/CDT1/CDCA8/CDCA5/NUF2/NDC80, |
| 3076 tags=38%, | 9212/2724GO_BP  | AURKB/TNFRSF21/LGALS9/BAK1/LGALS3/ADA/C  |
| 2029 tags=38%, | 2810/5347/GO_BP | SFN/PLK1/CCNB1/SOX4/E2F1/CDK1/AURKA/CDC, |
| 4411 tags=48%, | 5570/9212/GO_BP | PKIB/AURKB/NEK2/SRC/RFC4/DSCC1/CCT5/CCT  |
| 2588 tags=37%, | 5347/8162GO_BP  | PLK1/CDT1/KIF4A/CENPA/KIF20A/CEP55/ANLN, |
| 5830 tags=72%, | 1535/4688/GO_BP | CYBA/NCF2/CYBB/ITGAV/TAP1/NCF4/NCF1/PSM  |
| 3894 tags=34%, | 226/5047GO_BP   | ALDOA/PAEP/LGALS3/HAVCR2/CLGN/NCK2/CCT5, |
| 4513 tags=54%, | 79019/105GO_BP  | CENPM/CENPA/HJURP/CENPH/CENPW/OIP5/CENP  |
| 6130 tags=63%, | 116028/96GO_BP  | RM12/CD44/CD74/MUC1/CDKN2D/ZNF385A/HSF1, |
| 1930 tags=35%, | 1728/1401/GO_BP | NQO1/CRP/APOA4/CYBA/NCF2/TYROBP/TGFB1/I  |
| 1603 tags=36%, | 991/5347GO_BP   | CDC20/PLK1/CCNB1/PTTG1/CDT1/AURKB/TACC3, |
| 5339 tags=51%, | 27242/730GO_BP  | TNFRSF21/TYROBP/ADA/MZB1/CLCF1/CD74/PKN  |
| 3828 tags=48%, | 2810/891GO_BP   | SFN/CCNB1/SOX4/E2F1/CDK1/AURKA/CDC25C/G  |
| 5765 tags=64%, | 9454/2207/GO_BP | HOMER3/FCER1G/RIPK2/HAVCR2/PRNP/IL18/HD  |
| 6353 tags=75%, | 23246/511GO_BP  | BOP1/MRT04/NPM1/RRS1/BRIX1/RRP7A/NOP2/R  |
| 3828 tags=48%, | 2810/891GO_BP   | SFN/CCNB1/SOX4/E2F1/CDK1/AURKA/CDC25C/G  |
| 5574 tags=56%, | 2207/3965/GO_BP | FCER1G/LGALS9/NDRG1/RAC2/CPLX2/LAT2/SYK, |
| 2518 tags=47%, | 991/5347GO_BP   | CDC20/PLK1/CCNB1/PTTG1/CDT1/AURKB/TACC3, |
| 1603 tags=38%, | 991/5347GO_BP   | CDC20/PLK1/CCNB1/PTTG1/CDT1/AURKB/TACC3, |
| 3655 tags=39%, | 9133/3965/GO_BP | CCNB2/LGALS9/BAK1/TGFB1/ADA/CORO1A/CD74, |
| 4832 tags=62%, | 79019/105GO_BP  | CENPM/CENPA/SOX9/ASF1B/HJURP/MCM2/CHAF1  |
| 5771 tags=58%, | 5570/9212/GO_BP | PKIB/AURKB/NEK2/SRC/SMG5/PIF1/CCT5/CCT6, |
| 3595 tags=57%, | 81620/4171GO_BP | CDT1/MCM2/CDC45/GINS1/MCM4/RFC4/RAD51/M  |
| 3828 tags=47%, | 2810/891GO_BP   | SFN/CCNB1/SOX4/E2F1/CDK1/AURKA/CDC25C/G  |
| 4207 tags=49%, | 4751/899GO_BP   | NEK2/CCNF/AURKA/CEP131/KIF11/NUP62/CHEK  |
| 2048 tags=39%, | 891/11004/GO_BP | CCNB1/KIF2C/CDT1/CDCA8/CDCA5/NUF2/NDC80, |
| 3132 tags=46%, | 991/5347GO_BP   | CDC20/PLK1/CCNB1/PTTG1/CDT1/AURKB/TRIP1, |
| 6427 tags=60%, | 5570/9212/GO_BP | PKIB/AURKB/NEK2/SRC/SMG5/PIF1/CCT5/CCT6, |
| 1603 tags=41%, | 991/5347GO_BP   | CDC20/PLK1/CCNB1/PTTG1/CDT1/AURKB/TACC3, |
| 1603 tags=39%, | 991/5347GO_BP   | CDC20/PLK1/CCNB1/CDT1/AURKB/TACC3/TRIP1, |
| 2029 tags=39%, | 2810/891GO_BP   | SFN/CCNB1/SOX4/E2F1/CDK1/AURKA/CDC25C/G  |
| 2029 tags=39%, | 2810/891GO_BP   | SFN/CCNB1/SOX4/E2F1/CDK1/AURKA/CDC25C/G  |
| 2029 tags=39%, | 2810/891GO_BP   | SFN/CCNB1/SOX4/E2F1/CDK1/AURKA/CDC25C/G  |
| 4296 tags=45%, | 54443/727GO_BP  | ANLN/TTK/AURKA/CEP131/ABHD17C/NUP62/SPA  |
| 2029 tags=40%, | 2810/891GO_BP   | SFN/CCNB1/SOX4/E2F1/CDK1/AURKA/CDC25C/G  |
| 2029 tags=40%, | 2810/891GO_BP   | SFN/CCNB1/SOX4/E2F1/CDK1/AURKA/CDC25C/G  |
| 2029 tags=39%, | 2810/891GO_BP   | SFN/CCNB1/SOX4/E2F1/CDK1/AURKA/CDC25C/G  |
| 3033 tags=50%, | 991/5347GO_BP   | CDC20/PLK1/CCNB1/CDT1/AURKB/TACC3/TRIP1, |
| 2852 tags=33%, | 54209/573GO_BP  | TREM2/PTGFRN/TYROBP/GDF15/PLEKHO1/ADAM9, |
| 4621 tags=44%, | 54209/291GO_BP  | TREM2/PYCARD/TNFRSF21/FCER1G/LGALS9/TYR  |

|                |                 |                                           |
|----------------|-----------------|-------------------------------------------|
| 4258 tags=55%, | 4605/991/εGO_BP | MYBL2/CDC20/BIRC5/PLK1/KIF4A/AURKB/TPX2.  |
| 3033 tags=49%, | 991/5347/εGO_BP | CDC20/PLK1/CCNB1/CDT1/AURKB/TRIP13/CDC6.  |
| 2852 tags=33%, | 54209/573εGO_BP | TREM2/PTGFRN/TYROBP/GDF15/PLEKHO1/ADAM9.  |
| 3033 tags=51%, | 991/5347/εGO_BP | CDC20/PLK1/CCNB1/CDT1/AURKB/TRIP13/CDC6.  |
| 3132 tags=49%, | 991/5347/εGO_BP | CDC20/PLK1/CCNB1/PTTG1/CDT1/AURKB/TRIP13. |
| 2852 tags=33%, | 54209/573εGO_BP | TREM2/PTGFRN/TYROBP/GDF15/PLEKHO1/ADAM9.  |
| 4662 tags=51%, | 2207/3684/GO_BP | FCER1G/ITGAM/ITGB2/PTAFR/SCAMP5/SYK/UNC   |
| 4815 tags=54%, | 2207/3965/GO_BP | FCER1G/LGALS9/RAC2/CPLX2/LAT2/SYK/UNC13D. |
| 4815 tags=51%, | 2207/3965/GO_BP | FCER1G/LGALS9/RAC2/CPLX2/LAT2/SYK/UNC13D. |
| 3428 tags=43%, | 9536/5730/GO_BP | PTGES/PTGDS/ELOVL7/ALOX5AP/FABP5/CD74/AL  |
| 3223 tags=55%, | 54443/949εGO_BP | ANLN/KIF23/ECT2/RACGAP1/PLEK/FMNL2/EZR/   |
| 5178 tags=59%, | 29089/588εGO_BP | UBE2T/RAD51/FANCI/FANCD2/RAD51AP1/EME1/   |
| 1236 tags=27%, | 8877/891/εGO_BP | SPHK1/CCNB1/S100A6/E2F1/CDC6/ANXA2/CCNA   |
| 3750 tags=49%, | 5347/1058/GO_BP | PLK1/CENPA/NDC80/SAPCD2/MISP/NUSAP1/ARH   |
| 2865 tags=44%, | 6696/4318/GO_BP | SPP1/MMP9/EPO/TIMP1/LIF/FBLN1/STC2/DDR1.  |
| 4283 tags=44%, | 4318/3976/GO_BP | MMP9/LIF/CSF1/TGFB1/SPI1/C1QC/CSF1R/IL3.  |
| 1927 tags=47%, | 991/5347/εGO_BP | CDC20/PLK1/CCNB1/PTTG1/CDT1/AURKB/TRIP13. |
| 4815 tags=52%, | 2207/3965/GO_BP | FCER1G/LGALS9/RAC2/CPLX2/LAT2/SYK/UNC13D. |
| 3750 tags=49%, | 5347/1058/GO_BP | PLK1/CENPA/NDC80/SAPCD2/MISP/NUSAP1/ARH   |
| 3727 tags=51%, | 4192/3958/GO_BP | MDK/LGALS3/CSF1/S100A14/TGFB1/SLAMF8/NB   |
| 2048 tags=41%, | 891/11004/GO_BP | CCNB1/KIF2C/CDT1/CDCA8/CDCA5/NUF2/NDC80.  |
| 1927 tags=45%, | 991/5347/εGO_BP | CDC20/PLK1/CCNB1/PTTG1/CDT1/AURKB/TRIP13. |
| 5785 tags=67%, | 2207/3965/GO_BP | FCER1G/LGALS9/RAC2/ITGAM/ITGB2/PTAFR/SY   |
| 5412 tags=76%, | 54443/949εGO_BP | ANLN/KIF23/ECT2/RACGAP1/PLEK/FMNL2/EZR/   |
| 4513 tags=77%, | 79019/105εGO_BP | CENPM/CENPA/HJURP/CENPH/CENPW/OIP5/CENP   |
| 4815 tags=57%, | 2207/3965/GO_BP | FCER1G/LGALS9/RAC2/SYK/UNC13D/HMOX1/CD3   |
| 4811 tags=64%, | 79019/105εGO_BP | CENPM/CENPA/HJURP/CENPH/CENPW/OIP5/CENP   |
| 3356 tags=57%, | 4192/3965/GO_BP | MDK/LGALS9/TGFB1/FANCD2/TNFRSF18/SOCS1/   |
| 4096 tags=63%, | 891/983/9εGO_BP | CCNB1/CDK1/CDC25B/RCC2/CDC25C/DTL/SMAR    |
| 2848 tags=52%, | 891/11004/GO_BP | CCNB1/KIF2C/CDT1/AURKB/NUF2/NDC80/NEK2/   |
| 5104 tags=56%, | 2207/3965/GO_BP | FCER1G/LGALS9/RAC2/SYK/UNC13D/HMOX1/CD3   |
| 1927 tags=46%, | 991/5347/εGO_BP | CDC20/PLK1/CCNB1/PTTG1/CDT1/AURKB/TRIP13. |
| 4513 tags=68%, | 79019/105εGO_BP | CENPM/CENPA/HJURP/CENPF/CENPH/CENPW/OIP.  |
| 3266 tags=58%, | 100133941/GO_BP | CD24/CYBA/NCF2/RAC2/CYBB/SLAMF8/HCK/NCF.  |
| 1927 tags=47%, | 991/5347/εGO_BP | CDC20/PLK1/CCNB1/PTTG1/CDT1/AURKB/TRIP13. |
| 4513 tags=79%, | 79019/105εGO_BP | CENPM/CENPA/HJURP/CENPH/CENPW/OIP5/CENP   |
| 3356 tags=57%, | 4192/3965/GO_BP | MDK/LGALS9/TGFB1/FANCD2/TNFRSF18/SOCS1/   |
| 4662 tags=75%, | 10053/305εGO_BP | AP1M2/HCK/PACS1/SCRIB/ATP6V1H/RAC1/LCK/.  |
| 4513 tags=79%, | 79019/105εGO_BP | CENPM/CENPA/HJURP/CENPH/CENPW/OIP5/CENP   |
| 1927 tags=46%, | 991/5347/εGO_BP | CDC20/PLK1/CCNB1/PTTG1/CDT1/AURKB/TRIP13. |
| 4667 tags=74%, | 79019/105εGO_BP | CENPM/CENPA/ASF1B/HJURP/CENPH/CENPW/OIP.  |
| 1930 tags=46%, | 1401/1535/GO_BP | CRP/CYBA/NCF2/TYROBP/TGFB1/ITGAM/CYBB/G.  |
| 2917 tags=56%, | 81620/990/GO_BP | CDT1/CDC6/MCM2/CDC45/MCM4/ORC6/CCNE1/OR   |
| 4667 tags=72%, | 79019/105εGO_BP | CENPM/CENPA/ASF1B/HJURP/CENPH/CENPW/OIP.  |
| 3750 tags=52%, | 5347/1058/GO_BP | PLK1/CENPA/NDC80/SAPCD2/MISP/NUSAP1/ARH   |
| 3033 tags=56%, | 991/5347/εGO_BP | CDC20/PLK1/CCNB1/CDT1/AURKB/TRIP13/NDC8   |
| 3894 tags=38%, | 226/5047/1GO_BP | ALDOA/PAEP/CLGN/CCT5/CCT3/ZP3/CCT2/UBAP.  |
| 4258 tags=38%, | 9212/990/εGO_BP | AURKB/CDC6/CDC25B/KIF23/ECT2/RACGAP1/NU   |
| 3033 tags=54%, | 991/5347/εGO_BP | CDC20/PLK1/CCNB1/CDT1/AURKB/TRIP13/NDC8   |
| 2298 tags=38%, | 5570/9212/GO_BP | PKIB/AURKB/NEK2/CCT5/CCT6A/CCT3/MAPK3/DI  |
| 1603 tags=47%, | 991/5347/εGO_BP | CDC20/PLK1/CCNB1/CDT1/AURKB/TRIP13/NDC8   |

|                |                 |                                           |
|----------------|-----------------|-------------------------------------------|
| 1603 tags=47%, | 991/5347/EGO_BP | CDC20/PLK1/CCNB1/CDT1/AURKB/TRIP13/NDC80  |
| 2298 tags=41%, | 5570/9212/GO_BP | PKIB/AURKB/NEK2/CCT5/CCT6A/CCT3/MAPK3/D   |
| 1603 tags=47%, | 991/5347/EGO_BP | CDC20/PLK1/CCNB1/CDT1/AURKB/TRIP13/NDC80  |
| 1603 tags=47%, | 991/5347/EGO_BP | CDC20/PLK1/CCNB1/CDT1/AURKB/TRIP13/NDC80  |
| 3955 tags=52%, | 5347/7153/GO_BP | PLK1/TOP2A/TRIP13/CDC25B/TTK/AURKA/NCAP1  |
| 4096 tags=67%, | 891/983/9EGO_BP | CCNB1/CDK1/CDC25B/RCC2/CDC25C/DTL/SMARCB1 |
| 2121 tags=46%, | 9212/27242GO_BP | AURKB/TNFRSF21/BAK1/ADA/CD74/PKN1/BAX/M   |
| 3796 tags=65%, | 9837/4173/GO_BP | GINS1/MCM4/RFC4/RNASEH2A/FEN1/GINS2/MCM   |
| 2083 tags=20%, | 6690/5047/GO_BP | SPINK1/PAEP/CABYR/SLC26A6/DEFB1           |
| 4520 tags=61%, | 2207/3684/GO_BP | FCER1G/ITGAM/ITGB2/PTAFR/SYK/F2RL1/FGR/   |
| 1188 tags=22%, | 6690/5047/GO_BP | SPINK1/PAEP/LHFPL2/PLCB1/ZP3              |
| 3446 tags=75%, | 9837/4173/GO_BP | GINS1/MCM4/RFC4/RNASEH2A/FEN1/GINS2/MCM   |
| 609 tags=54%,  | 3159/9401/GO_BP | HMGAI1/RECQL4/MCM2/MCM4/RAD51/MCM6/MCM7   |
| 3520 tags=64%, | 4751/6790/GO_BP | NEK2/AURKA/KIF11/NUP62/CHEK1/CEP85/RANBP1 |
| 1 tags=8%,     | 1 6696 GO_BP    | SPP1                                      |
| 1317 tags=50%, | 6714/9181/GO_BP | SRC/ARHGEF2/HCK/ASAP1/FSCN1/MSN/LCP1      |
| 2732 tags=71%, | 4171/8318/GO_BP | MCM2/CDC45/GINS1/MCM4/RAD51/MCM6/MCM3/F   |
| 548 tags=36%,  | 4192/3383/GO_BP | MDK/ICAM1/ITGB2/IRAK1/PTAFR               |
| 3511 tags=87%, | 22948/908/GO_BP | CCT5/CCT6A/CCT3/RUVBL1/DKC1/CCT2/CCT4/N   |
| 3598 tags=75%, | 81620/990/GO_BP | CDT1/CDC6/CDC45/ORC1/TICRR/TIPIN/TOPBP1   |
| 1586 tags=35%, | 1535/6372/GO_BP | CYBA/CXCL6/PGC/HAVCR2/GRN/F2RL1           |
| 1377 tags=67%, | 24137/9212GO_BP | KIF4A/AURKB/PRC1/KIF23/RACGAP1/PPP2R1A    |
| 1586 tags=56%, | 1535/5225/GO_BP | CYBA/PGC/HAVCR2/GRN/F2RL1                 |
| 1227 tags=91%, | 4171/8318/GO_BP | MCM2/CDC45/MCM4/MCM6/GINS2/MCM7/MCM3/CD   |
| 1283 tags=64%, | 4192/7076/GO_BP | MDK/TIMP1/TGFB1/GRN/HMOX1/SIGLEC10/HIF1   |
| 530 tags=62%,  | 24137/9212GO_BP | KIF4A/AURKB/PRC1/KIF23/RACGAP1            |
| 971 tags=86%,  | 4171/4173/GO_BP | MCM2/MCM4/MCM6/MCM7/MCM3/MCM5             |
| 971 tags=86%,  | 4171/4173/GO_BP | MCM2/MCM4/MCM6/MCM7/MCM3/MCM5             |
| 971 tags=86%,  | 4171/4173/GO_BP | MCM2/MCM4/MCM6/MCM7/MCM3/MCM5             |
| 530 tags=67%,  | 24137/9212GO_BP | KIF4A/AURKB/KIF23/RACGAP1                 |
| 5597 tags=41%, | 79574/3984GO_BP | EPS8L3/LIMK1/FOXO1/EPOR/STMN1/ITGA3/ARHG  |
| 7249 tags=53%, | 891/9212/EGO_BP | CCNB1/AURKB/CDK1/CCNA2/LIF/TGFB1/AURKA/   |
| 5182 tags=37%, | 6364/5909/GO_BP | CCL20/RAP1GAP/PYCARD/RGS2/RGS1/ICAM1/SH   |
| 6306 tags=46%, | 2810/10013GO_BP | SFN/CD24/TESC/UCHL1/PLK1/CCNB1/CCNB2/PY   |
| 4383 tags=28%, | 6696/991/EGO_BP | SPP1/CDC20/SPINT1/S100A9/TREM2/LIMK1/RG   |
| 4662 tags=31%, | 6692/6280/GO_BP | SPINT1/S100A9/TREM2/LIMK1/RGS2/MDK/E2F1   |
| 6206 tags=47%, | 100133941/GO_BP | CD24/S100A9/MUC13/CRP/TREM2/PYCARD/CYBA   |
| 6222 tags=45%, | 991/100133GO_BP | CDC20/CD24/PLK1/CCNB1/PKIB/AURKB/TPX2/C   |
| 5045 tags=37%, | 56667/1033GO_BP | MUC13/B3GNT3/GCNT3/ST6GALNAC4/BACE2/CHS   |
| 6169 tags=42%, | 5347/891/EGO_BP | PLK1/CCNB1/AURKB/EPOR/IKBKE/CDK1/PFN2/BA  |
| 6062 tags=48%, | 6280/56667GO_BP | S100A9/MUC13/PYCARD/CYBA/LY96/MMP12/IKB   |
| 6112 tags=46%, | 4318/7262/GO_BP | MMP9/PHLDA2/PLK1/CDT1/CTHRC1/AURKB/E2F1   |
| 3847 tags=22%, | 1364/2810/GO_BP | CLDN4/SFN/KRT19/SOX9/TGM3/COL1A1/STMN1/   |
| 6062 tags=50%, | 6280/56667GO_BP | S100A9/MUC13/PYCARD/CYBA/LY96/IKBKE/FCE   |
| 6695 tags=51%, | 3159/29108GO_BP | HMGAI1/PYCARD/LCN2/MMP12/ENO1/IKBKE/LGAL  |
| 4322 tags=35%, | 54997/1053GO_BP | TESC/AGR2/TREM2/ATP1B3/ANXA2/FCER1G/ITG   |
| 5653 tags=53%, | 3576/7153/GO_BP | CXCL8/TOP2A/ANXA2/KPNA2/LGALS9/LGALS1/C   |
| 6214 tags=51%, | 2810/302/2GO_BP | SFN/ANXA2/FCER1G/RAC2/DAB2/ECT2/TGFB1/I   |
| 4694 tags=42%, | 768/112393GO_BP | CA9/EGLN3/CCNB1/E2F1/EPOR/ENO1/ICAM1/HIL  |
| 4796 tags=42%, | 768/112393GO_BP | CA9/EGLN3/CCNB1/E2F1/EPOR/ENO1/ICAM1/HIL  |
| 3774 tags=38%, | 54209/4192GO_BP | TREM2/MDK/CXCL8/LGALS9/VEGFB/SEMA6A/RAC   |



|                                |                                          |
|--------------------------------|------------------------------------------|
| 6220 tags=52%, 79574/5909GO_BP | EPS8L3/RAP1GAP/KCTD17/ICAM1/ANLN/PFN2/S  |
| 3454 tags=31%, 4318/8162GO_BP  | MMP9/CDT1/E2F1/CDCA5/HJURP/NEK2/PLAUR/L  |
| 4274 tags=44%, 6692/1159GO_BP  | SPINT1/CTHRC1/SOX4/TEAD2/SPINT2/TGFB1/F  |
| 4527 tags=44%, 3159/7153GO_BP  | HMGAI1/TOP2A/RECQL4/MCM2/CDC45/GINS1/MCM |
| 3935 tags=29%, 5347/9232GO_BP  | PLK1/PTTG1/TOP2A/TRIP13/CDC25B/CKS2/CCN  |
| 3729 tags=42%, 4192/3576GO_BP  | MDK/CXCL8/LGALS9/VEGFB/RAC2/CSF1/S100A1  |
| 5097 tags=45%, 11004/822GO_BP  | KIF2C/CAPG/STMN1/SH3BP1/MICAL1/KIF18B/A  |
| 6676 tags=63%, 4318/10551GO_BP | MMP9/AGR2/PLAUR/RHBDF2/NCK2/ADORA1/SHKB  |
| 3903 tags=45%, 4192/3576GO_BP  | MDK/CXCL8/LGALS9/VEGFB/RAC2/CSF1/S100A1  |
| 3776 tags=43%, 6280/11239GO_BP | S100A9/EGLN3/PYCARD/BAK1/ROBO1/S100A8/C  |
| 4496 tags=52%, 768/112399GO_BP | CA9/EGLN3/EPO/PSMB9/PSMD14/PSMD2/HIF1A/  |
| 3894 tags=33%, 226/50471GO_BP  | ALDOA/PAEP/CLGN/CCT5/CCT3/ZP3/CCT2/UBAP  |
| 3158 tags=38%, 1869/4751GO_BP  | E2F1/NEK2/TMSB4X/MDFI/DDIT3/HMOX1/MAD2L  |
| 5771 tags=57%, 5570/9212GO_BP  | PKIB/AURKB/NEK2/SRC/SMG5/PIF1/CCT5/CCT6  |
| 6228 tags=63%, 81620/5984GO_BP | CDT1/RFC4/DSCC1/CDC7/GMNN/CHTF18/TICRR/  |
| 5482 tags=52%, 991/53479GO_BP  | CDC20/PLK1/LIMK1/UBE2S/TRIB3/MAGEC2/MAD  |
| 4621 tags=41%, 54209/291GO_BP  | TREM2/PYCARD/TNFRSF21/FCER1G/LGALS9/TYR  |
| 4127 tags=43%, 54209/706GO_BP  | TREM2/TSP0/MMP14/CSF1/P2RX4/LAMB1/SCRIB  |
| 2658 tags=37%, 11151/5689GO_BP | CORO1A/SLAMF8/RAB31/ATP6V1F/RAB34/ATP6V  |
| 7160 tags=92%, 6628/6633GO_BP  | SNRPB/SNRPD2/SNRPD1/CD2BP2/LSM4/WDR77/S  |
| 2230 tags=34%, 6510/81539GO_BP | SLC1A5/SLC38A1/RGS2/NFKBIE/SLC6A9/SLC7A  |
| 4815 tags=55%, 2207/3965GO_BP  | FCER1G/LGALS9/RAC2/SYK/UNC13D/HMOX1/CD3  |
| 3750 tags=48%, 5347/1058GO_BP  | PLK1/CENPA/NDC80/SAPCD2/MISP/ARHGEF2/MA  |
| 3985 tags=49%, 6696/7689GO_BP  | SPP1/CA9/EPO/TSP0/AACS/KCNJ11/NME1/CDK4  |
| 6228 tags=66%, 81620/983GO_BP  | CDT1/CDK1/HRAS/CDC7/CACYBP/PCNA/E2F8/FG  |
| 4964 tags=54%, 5347/1058GO_BP  | PLK1/CENPA/NDC80/SAPCD2/MISP/ARHGEF2/MA  |
| 2246 tags=39%, 891/92129GO_BP  | CCNB1/AURKB/CDK1/CCNA2/AURKA/PKN1/PRKCD  |
| 3465 tags=49%, 4192/7040GO_BP  | MDK/TGFB1/BAIAP2L2/HRAS/HCK/CSF1R/TRPM2  |
| 1195 tags=31%, 1535/9909GO_BP  | CYBA/CDC6/SRC/CYBB/AGTRAP/PRKCD/HSF1/IQ  |
| 380 tags=35%, 81620/9219GO_BP  | CDT1/AURKB/CENPA/CDK1/NDC80/TTK/RCC2     |
| 3911 tags=74%, 1401/1535GO_BP  | CRP/CYBA/TYROBP/TGFB1/ITGAM/GSTP1/ITGB2  |
| 3149 tags=63%, 81620/1058GO_BP | CDT1/CENPA/NUF2/NDC80/CENPF/CENPH/CENPW  |
| 3852 tags=62%, 3561/6850GO_BP  | IL2RG/SYK/JAK3/SHC1/IL2RA/IL2RB/PTPN2/S  |
| 3505 tags=85%, 22948/908GO_BP  | CCT5/CCT6A/CCT3/DKC1/CCT2/CCT4/CCT7/TCP  |
| 3727 tags=74%, 54209/4199GO_BP | TREM2/MDK/MMP14/CSF1/P2RX4/CCL5/MAPK3/C  |
| 3729 tags=67%, 2302/1009GO_BP  | FOXJ1/ADA/PKN1/UNC13D/NFKB2/BCL3/CXCL13  |
| 3505 tags=75%, 22948/7909GO_BP | CCT5/NABP2/CCT6A/CCT3/DKC1/ACD/CCT2/CCT  |
| 1999 tags=67%, 5347/54449GO_BP | PLK1/ANLN/SAPCD2/MISP/EZR/EPB41L2/GPSM2  |
| 3505 tags=91%, 22948/908GO_BP  | CCT5/CCT6A/CCT3/DKC1/CCT2/CCT4/CCT7/TCP  |
| 2 tags=12%, 6690 GO_BP         | SPINK1                                   |
| 162 tags=25%, 4318/302 GO_BP   | MMP9/ANXA2                               |
| 2 tags=12%, 6690 GO_BP         | SPINK1                                   |
| 1283 tags=57%, 7076/7040GO_BP  | TIMP1/TGFB1/HMOX1/HIF1A                  |
| 732 tags=57%, 994/72729GO_BP   | CDC25B/TTK/CDC25C/CDC25A                 |
| 732 tags=57%, 994/72729GO_BP   | CDC25B/TTK/CDC25C/CDC25A                 |
| 1999 tags=83%, 54443/9499GO_BP | ANLN/KIF23/ECT2/RACGAP1/RTKN             |
| 1999 tags=83%, 54443/9499GO_BP | ANLN/KIF23/ECT2/RACGAP1/RTKN             |
| 110 tags=17%, 5225 GO_BP       | PGC                                      |
| 110 tags=17%, 5225 GO_BP       | PGC                                      |
| 996 tags=67%, 3965/3958GO_BP   | LGALS9/LGALS3/HAVCR2/HLA-DMB             |
| 670 tags=20%, 23236 GO_BP      | PLCB1                                    |

|                                |                                          |
|--------------------------------|------------------------------------------|
| 648 tags=60%, 54209/7305GO_BP  | TREM2/TYROBP/ADAM9                       |
| 1188 tags=40%, 5047/7784 GO_BP | PAEP/ZP3                                 |
| 5863 tags=43%, 100133941/GO_BP | CD24/CTHRC1/SOX4/MDK/SOX9/COL1A1/SULF1/  |
| 7377 tags=50%, 991/7345/5GO_BP | CDC20/UCHL1/PLK1/CCNB1/PTTG1/KCTD17/UBD  |
| 6823 tags=48%, 991/7345/5GO_BP | CDC20/UCHL1/PLK1/CCNB1/PTTG1/LAPTM4B/TR  |
| 6963 tags=51%, 4318/2810/GO_BP | MMP9/SFN/TREM2/PYCARD/E2F1/BAK1/TSPO/PL  |
| 5313 tags=42%, 9168/822/2GO_BP | TMSB10/CAPG/PYCARD/LIMK1/MDK/DBN1/ICAM1  |
| 3703 tags=34%, 100133941/GO_BP | CD24/AGR2/PYCARD/MDK/EPO/ICAM1/LGALS9/S  |
| 6144 tags=42%, 5347/891/9GO_BP | PLK1/CCNB1/AURKB/EPO/IKBKE/CDK1/PFN2/BA  |
| 6044 tags=49%, 6280/56667GO_BP | S100A9/MUC13/CYBA/LY96/IKBKE/FCER1G/TYR  |
| 6206 tags=46%, 54997/5420GO_BP | TESC/TREM2/MDK/LGALS9/FOXJ1/MMP14/LIF/C  |
| 6206 tags=49%, 6659/4192/GO_BP | SOX4/MDK/FCER1G/LGALS9/FOXJ1/CD3D/TGFB1  |
| 7666 tags=62%, 11004/822/GO_BP | KIF2C/CAPG/STMN1/SH3BP1/MICAL1/KIF18B/A  |
| 7379 tags=56%, 54997/5420GO_BP | TESC/TREM2/MDK/LGALS9/MMP14/LIF/CSF1/TY  |
| 7545 tags=65%, 6659/1277/GO_BP | SOX4/COL1A1/SRC/BAMBI/GPC3/WNK2/ASPM/PSI |
| 4326 tags=39%, 6692/11590GO_BP | SPINT1/CTHRC1/SOX4/SOX9/TEAD2/SPINT2/TG  |
| 4398 tags=41%, 6280/11239GO_BP | S100A9/EGLN3/PYCARD/LGALS9/BAK1/RIPK2/R  |
| 3774 tags=30%, 6690/991/7GO_BP | SPINK1/CDC20/PHLDA2/PAEP/TRIP13/SOX9/SU  |
| 4207 tags=43%, 5347/983/4GO_BP | PLK1/CDK1/NEK2/WDR62/ARL2/CCNF/AURKA/CE  |
| 4712 tags=44%, 29108/3389GO_BP | PYCARD/ICAM1/ARPC1B/PFN2/ARL2/PSRC1/COR  |
| 4374 tags=41%, 6280/11239GO_BP | S100A9/EGLN3/PYCARD/LGALS9/BAK1/ROB1/S   |
| 4207 tags=41%, 5347/983/4GO_BP | PLK1/CDK1/NEK2/WDR62/ARL2/CCNF/AURKA/CE  |
| 6418 tags=55%, 29108/4321GO_BP | PYCARD/MMP12/IKBKE/TRAIP/RIPK2/HAVCR2/I  |
| 4900 tags=46%, 2810/10551GO_BP | SFN/AGR2/TREM2/E2F1/ITGA3/ARHGEF16/LGAL  |
| 6418 tags=56%, 29108/4321GO_BP | PYCARD/MMP12/IKBKE/TRAIP/RIPK2/HAVCR2/I  |
| 3195 tags=36%, 9212/27242GO_BP | AURKB/TNFRSF21/FCER1G/LGALS9/BAK1/LGALS  |
| 5566 tags=52%, 2810/1869/GO_BP | SFN/E2F1/BAK1/YWHAZ/HK2/BAX/SLC9A1/SLC3  |
| 4274 tags=43%, 6692/11590GO_BP | SPINT1/CTHRC1/TEAD2/SPINT2/TGFB1/FOLR1/  |
| 1295 tags=23%, 8877/891/6GO_BP | SPHK1/CCNB1/S100A6/E2F1/CDC6/ANXA2/CCNA  |
| 4127 tags=44%, 3925/402/2GO_BP | STMN1/ARL2/SKA1/PSRC1/SKA3/ARHGEF2/TRIM  |
| 4127 tags=47%, 3925/402/8GO_BP | STMN1/ARL2/PSRC1/TUBG1/MAPRE1/MAP2/PAK1  |
| 3727 tags=21%, 7053/5266/GO_BP | TGM3/PI3/F13A1/COL3A1/TGM2/SPOCK2/EVPL/  |
| 4411 tags=48%, 5570/9212/GO_BP | PKIB/AURKB/NEK2/CCT5/NABP2/CCT6A/CCT3/S  |
| 3727 tags=47%, 54209/4192GO_BP | TREM2/MDK/LGALS3/MMP14/CSF1/P2RX4/SLAMF  |
| 4013 tags=43%, 4318/29108GO_BP | MMP9/PYCARD/BAK1/PLAUR/BAX/BMF/NOL3/LMN  |
| 3631 tags=36%, 991/9319/9GO_BP | CDC20/TRIP13/CDC25B/LIF/TTK/CDC25C/PLCB  |
| 4479 tags=53%, 3614/7083/GO_BP | IMPDH1/TK1/DTYMK/ADA/UCK2/UPP1/NME1/NME  |
| 2861 tags=42%, 891/7153/1GO_BP | CCNB1/TOP2A/CDCA5/CDK1/NCAPG/NUSAP1/NC   |
| 4824 tags=56%, 6241/1869/GO_BP | RRM2/E2F1/RAD51/EZH2/CDC7/CHEK1/RBBP8/B  |
| 5652 tags=72%, 3838/2597/GO_BP | KPNA2/GAPDH/ITGAV/SCRIB/ZC3H12A/KPNB1/C  |
| 2852 tags=40%, 54209/7305GO_BP | TREM2/TYROBP/GDF15/ADAM9/CD53/FLOT1/EHD  |
| 3911 tags=73%, 1401/1535/GO_BP | CRP/CYBA/TYROBP/TGFB1/ITGAM/GSTP1/ITGB2  |
| 2627 tags=50%, 54751/6714GO_BP | FBLIM1/SRC/MZB1/FERMT3/PLEK/COL16A1/CXC  |
| 4042 tags=64%, 22948/7909GO_BP | CCT5/NABP2/CCT6A/CCT3/DKC1/ACD/CCT2/CCT  |
| 2924 tags=45%, 6692/10659GO_BP | SPINT1/SPINT2/ST14/LEF1/WNT7B/SOCS3/FGF  |
| 3920 tags=79%, 22948/908/GO_BP | CCT5/CCT6A/CCT3/RUVBL1/DKC1/CCT2/CCT4/N  |
| 3520 tags=60%, 4751/6790/GO_BP | NEK2/AURKA/KIF11/NUP62/CHEK1/CEP85/RANB  |
| 3266 tags=53%, 5880/56839GO_BP | RAC2/SLAMF8/GRN/RAC1/JCHAIN/RPS19/CLEC7  |

|                                 |                                           |
|---------------------------------|-------------------------------------------|
| 3505 tags=100%, 22948/908/GO_BP | CCT5/CCT6A/CCT3/DKC1/CCT2/CCT4/CCT7/TCP   |
| 3505 tags=100%, 22948/908/GO_BP | CCT5/CCT6A/CCT3/DKC1/CCT2/CCT4/CCT7/TCP   |
| 3505 tags=100%, 22948/908/GO_BP | CCT5/CCT6A/CCT3/DKC1/CCT2/CCT4/CCT7/TCP   |
| 1927 tags=50%, 9319/994/GO_BP   | TRIP13/CDC25B/AURKA/FBX05                 |
| 1759 tags=75%, 10609/5351GO_BP  | P3H4/PLOD1/JMJD6/P3H3/PLOD2/PLOD3         |
| 2776 tags=50%, 100133941/GO_BP  | CD24/LIF/PROM1/PAX8                       |
| 202 tags=38%, 29108/2724GO_BP   | PYCARD/TNFRSF21/LGALS9                    |
| 563 tags=100%, 26007/1321GO_BP  | TKFC/GLYCTK/KHK/ALDOB                     |
| 337 tags=100%, 2875/6490GO_BP   | GPT/AGXT2/DAO/AGXT                        |
| 337 tags=100%, 2875/6490GO_BP   | GPT/AGXT2/DAO/AGXT                        |
| 819 tags=100%, 445/162417GO_BP  | ASS1/NAGS/OTC/CPS1                        |
| 898 tags=100%, 2954/3081/GO_BP  | GSTZ1/HGD/HPD/TAT                         |
| 337 tags=100%, 2875/6490GO_BP   | GPT/AGXT2/DAO/AGXT                        |
| 337 tags=100%, 2875/6490GO_BP   | GPT/AGXT2/DAO/AGXT                        |
| 507 tags=80%, 6653/4405GO_BP    | SORL1/PLIN5/GPLD1/APOC3                   |
| 591 tags=100%, 336/335/11GO_BP  | APOA2/APOA1/APOA5/APOC3                   |
| 75 tags=100%, 1544/1571/GO_BP   | CYP1A2/CYP2E1/CYP2C9/CYP3A4               |
| 771 tags=80%, 223/8424/GO_BP    | ALDH9A1/BBOX1/ACADM/SHMT1                 |
| 563 tags=100%, 26007/1321GO_BP  | TKFC/GLYCTK/KHK/ALDOB                     |
| 339 tags=80%, 66002/4051GO_BP   | CYP4F12/CYP4F3/CYP4F2/CYP4A11             |
| 6686 tags=52%, 2539/9536/GO_BP  | G6PD/PTGES/RGS2/BACE2/SOX4/RPL39L/ATP13   |
| 7323 tags=49%, 8877/991/GO_BP   | SPHK1/CDC20/PLK1/UBD/LIMK1/UBE2T/SOX4/UBI |
| 6823 tags=46%, 991/7345/GO_BP   | CDC20/UCHL1/PLK1/CCNB1/PTTG1/KCTD17/UBD   |
| 6823 tags=46%, 991/7345/GO_BP   | CDC20/UCHL1/PLK1/CCNB1/PTTG1/TREM2/KCTD   |
| 5863 tags=43%, 100133941/GO_BP  | CD24/CTHRC1/SOX4/MDK/SOX9/COL1A1/SULF1/   |
| 4995 tags=38%, 2539/5315/GO_BP  | G6PD/PKM/MUC13/HKDC1/B3GNT3/ALDOA/GCNT3   |
| 4917 tags=34%, 8877/1001GO_BP   | SPHK1/CD24/S100A9/CCL20/TREM2/PYCARD/UBI  |
| 5045 tags=37%, 56667/103GO_BP   | MUC13/B3GNT3/GCNT3/ST6GALNAC4/BACE2/MMP   |
| 6249 tags=44%, 5347/891/GO_BP   | PLK1/CCNB1/TMED3/LAPTM4B/CCNB2/CDK1/NDR   |
| 5706 tags=46%, 6510/3576/GO_BP  | SLC1A5/CXCL8/SLC52A2/TOP2A/ANXA2/KPNA2/   |
| 6206 tags=46%, 6659/4192/GO_BP  | SOX4/MDK/FCER1G/LGALS9/BAK1/FOXJ1/TYRO3   |
| 6062 tags=45%, 6280/56667GO_BP  | S100A9/MUC13/TREM2/PYCARD/CYBA/LY96/PGC   |
| 8957 tags=66%, 5347/79734GO_BP  | PLK1/KCTD17/TUBA4A/CDK1/NEK2/FOXJ1/FLNA   |
| 4398 tags=32%, 2539/4605/GO_BP  | G6PD/MYBL2/EGLN3/NQO1/MDK/TNFRSF21/EPO/   |
| 5555 tags=43%, 9168/822/GO_BP   | TMSB10/CAPG/PYCARD/LIMK1/MDK/DBN1/ICAM1   |
| 8957 tags=65%, 5347/79734GO_BP  | PLK1/KCTD17/TUBA4A/CDK1/NEK2/FOXJ1/FLNA   |
| 457 tags=100%, 1543/1577/GO_BP  | CYP1A1/CYP3A5/CYP2E1/CYP2C8/CYP3A4        |
| 767 tags=83%, 137362/28GO_BP    | GOT1L1/GOT1/ASPA/ASS1/GOT2                |
| 349 tags=83%, 1553/1543/GO_BP   | CYP2A13/CYP1A1/CYP2A7/PON3/CYP2A6         |
| 349 tags=83%, 1553/1543/GO_BP   | CYP2A13/CYP1A1/CYP2A7/PON3/CYP2A6         |
| 1024 tags=83%, 1644/590/GO_BP   | DDC/BCHE/CYP3A5/CYP1A2/CYP3A4             |
| 4163 tags=31%, 6692/5420GO_BP   | SPINT1/TREM2/BACE2/SOX4/MDK/TNFRSF21/E2F  |
| 417 tags=83%, 55349/501/GO_BP   | CHDH/ALDH7A1/SARDH/DMGDH/BHMT             |
| 219 tags=100%, 9615/7498/GO_BP  | GDA/XDH/AOX1/DPYS/ALDH6A1                 |
| 3758 tags=38%, 8877/6364/GO_BP  | SPHK1/CCL20/PYCARD/CYBA/LCN2/CXCL8/TNFR   |
| 6454 tags=49%, 29108/105GO_BP   | PYCARD/UBD/LY96/S100A4/IKBKE/LGALS9/ECT   |
| 4398 tags=31%, 2539/4605/GO_BP  | G6PD/MYBL2/EGLN3/NQO1/MDK/TNFRSF21/TYRO   |
| 3510 tags=30%, 2919/5420GO_BP   | CXCL1/TREM2/PYCARD/CXCL6/LY96/LCN2/CXCL   |
| 4093 tags=37%, 4318/2056/GO_BP  | MMP9/EPO/ENO1/ICAM1/SRC/LGALS3/PLAUR/GS   |
| 338 tags=40%, 7083/1841 GO_BP   | TK1/DTYMK                                 |
| 338 tags=40%, 7083/1841 GO_BP   | TK1/DTYMK                                 |

|                                 |                                         |
|---------------------------------|-----------------------------------------|
| 666 tags=40%, 22943/1088GO_BP   | DKK1/C1QL1                              |
| 5732 tags=39%, 226/5047/2GO_BP  | ALDOA/PAEP/TNFRSF21/LGALS3/HAVCR2/CLGN/ |
| 5876 tags=53%, 3576/7153/GO_BP  | CXCL8/TOP2A/ANXA2/KPNA2/LGALS9/LGALS1/C |
| 7518 tags=67%, 891/10212/GO_BP  | CCNB1/DDX39A/EXOSC4/ALYREF/HSF1/INTS8/L |
| 7153 tags=61%, 4192/3965/GO_BP  | MDK/LGALS9/FOXJ1/TGFB1/RIPK2/ADA/CD74/F |
| 5887 tags=51%, 4318/2810/GO_BP  | MMP9/SFN/PYCARD/E2F1/BAK1/PLAUR/YWHAZ/H |
| 5652 tags=55%, 7153/302/3GO_BP  | TOP2A/ANXA2/KPNA2/LGALS9/LGALS1/CD74/CS |
| 4770 tags=46%, 4192/7040/GO_BP  | MDK/TGFB1/FLNA/S1PR2/BATF2/PLEK/HRAS    |
| 5981 tags=52%, 79574/7973GO_BP  | EPS8L3/KCTD17/ANLN/RAC2/AGRN/HRAS/CDC42 |
| 4274 tags=43%, 6692/1159GO_BP   | SPINT1/CTHRC1/TEAD2/SPINT2/TGFB1/FOLR1/ |
| 4643 tags=41%, 6280/5420GO_BP   | S100A9/TREM2/PYCARD/CXCL6/POSTN/LGALS9/ |
| 2476 tags=28%, 8877/891/6GO_BP  | SPHK1/CCNB1/S100A6/E2F1/CDC6/ANXA2/CCNA |
| 3729 tags=48%, 54997/3383GO_BP  | TESC/ICAM1/ITGB4/ADA/ITGB2/FERMT3/ITGAV |
| 4322 tags=52%, 972/3315/6GO_BP  | CD74/HSPB1/P3H1/DNAJC5/HSPA6/FKBP1A/HSP |
| 771 tags=86%, 55349/223/GO_BP   | CHDH/ALDH9A1/BBOX1/ACADM/ALDH7A1/SHMT1  |
| 4469 tags=50%, 3925/402/8GO_BP  | STMN1/ARL2/PSRC1/MAPRE1/MAP2/PAK1/TUBB4 |
| 3509 tags=46%, 302/1277/4GO_BP  | ANXA2/COL1A1/MMP11/LOXL4/P3H4/COL1A2/CO |
| 3870 tags=43%, 11004/3925GO_BP  | KIF2C/STMN1/KIF18B/ARHGEF2/TRIM54/MID1I |
| 5821 tags=79%, 23246/5115GO_BP  | BOP1/MRT04/RRS1/BRX1/NOP2/NLE1/RPL10L/  |
| 1927 tags=41%, 81620/6241GO_BP  | CDT1/RRM2/E2F1/CDC6/CDC45/CCNE1/ORC1/TY |
| 1784 tags=37%, 2207/3965/GO_BP  | FCER1G/LGALS9/HAVCR2/SYK/CD86/ZP3/CD3E/ |
| 4970 tags=63%, 891/81620/GO_BP  | CCNB1/CDT1/CDC6/DLGAP5/RCC2/FEN1/ESPL1/ |
| 3428 tags=50%, 9536/5730/GO_BP  | PTGES/PTGDS/FABP5/CD74/AKR1C3/MIF/PTGES |
| 5913 tags=75%, 112399/106GO_BP  | EGLN3/P3H4/ASPH/PLOD1/P3H1/P4HA2/JMJD6/ |
| 3428 tags=50%, 9536/5730/GO_BP  | PTGES/PTGDS/FABP5/CD74/AKR1C3/MIF/PTGES |
| 886 tags=75%, 5194/224/5GO_BP   | PEX13/ALDH3A2/PECR/PHYH/SLC27A2/HA01    |
| 1099 tags=75%, 3067/3034/GO_BP  | HDC/HAL/HNMT/AMDHD1/FTCD/UROC1          |
| 1199 tags=100%, 5096/16678GO_BP | PCCB/MMAA/MCEE/ACADS/PHYH/PCK2/PCK1     |
| 1099 tags=75%, 3067/3034/GO_BP  | HDC/HAL/HNMT/AMDHD1/FTCD/UROC1          |
| 854 tags=62%, 117247/124GO_BP   | SLC16A10/ABCC2/SLC16A2/SERPINA7/TTR     |
| 819 tags=64%, 435/445/38GO_BP   | ASL/ASS1/ARG1/NAGS/SLC25A15/OTC/CPS1    |
| 1334 tags=91%, 2108/37/25GO_BP  | ETFA/ACADVL/ETFBKMT/ACAD11/ACADS/ETFDH/ |
| 328 tags=45%, 8993/3078/GO_BP   | PGLYRP1/CFHR1/CFHR2/GPLD1/CFHR5         |
| 1409 tags=73%, 2098/57026GO_BP  | ESD/PDXP/ADH5/HOGA1/HAGH/AGXT2/AGXT/ADH |
| 944 tags=64%, 3155/56898GO_BP   | HMGCL/BDH2/ACSS3/ACAT1/BDH1/HMGCS2/SLC2 |
| 917 tags=64%, 125061/166GO_BP   | AFMID/IDO2/AADAT/GOT2/TDO2/KMO/ALDH8A1  |
| 459 tags=55%, 38/66002/4GO_BP   | ACAT1/CYP4F12/CYP4F3/BDH1/CYP4F2/CYP4A1 |
| 2867 tags=47%, 1869/706/2GO_BP  | E2F1/TSP0/ETV5/LYN/IL1B/PPP1CC/PRKCI    |
| 1090 tags=60%, 3383/3965/GO_BP  | ICAM1/LGALS9/LGALS3/HAVCR2/HLA-DMB/APBB |
| 417 tags=67%, 55349/501/GO_BP   | CHDH/ALDH7A1/BCHE/SARDH/DMGDH/BHMT      |
| 905 tags=89%, 3949/348/3GO_BP   | LDLR/APOE/APOC2/GPIHBP1/LIPC/APOB/APOC1 |
| 1121 tags=78%, 8659/11281GO_BP  | ALDH4A1/HOGA1/GOT2/GRHPR/PRODH2/AGXT2/A |
| 905 tags=89%, 3949/348/3GO_BP   | LDLR/APOE/APOC2/GPIHBP1/LIPC/APOB/APOC1 |
| 1277 tags=67%, 150094/348GO_BP  | SIK1/APOE/SORL1/PLIN5/GPLD1/APOC3       |
| 213 tags=89%, 1557/11361GO_BP   | CYP2C19/CYP2U1/CYP1A1/CYP1A2/CYP4F2/CYP |
| 3505 tags=92%, 22948/908/GO_BP  | CCT5/CCT6A/CCT3/DKC1/CCT2/CCT4/CCT7/TCP |
| 6823 tags=46%, 991/7345/5GO_BP  | CDC20/UCHL1/PLK1/CCNB1/PTTG1/KCTD17/UBD |
| 5671 tags=31%, 6690/5347/GO_BP  | SPINK1/PLK1/CCNB1/PTTG1/ALDOA/PAFAH1B3/ |
| 5671 tags=32%, 6696/6690/GO_BP  | SPP1/SPINK1/MMP7/PLK1/CCNB1/PTTG1/PAFAH |
| 5671 tags=32%, 6696/6690/GO_BP  | SPP1/SPINK1/MMP7/PLK1/CCNB1/PTTG1/PAFAH |
| 6214 tags=45%, 2810/1410/GO_BP  | SFN/CRYAB/ANXA2/FCER1G/LGALS9/PFN2/SRC/ |

|                 |                 |                                          |
|-----------------|-----------------|------------------------------------------|
| 4982 tags=37%,  | 100133941/GO_BP | CD24/UCLH1/RGS2/DUSP9/CDK1/SRC/TRIB3/TG  |
| 1684 tags=56%,  | 24137/9212GO_BP | KIF4A/AURKB/KIF23/RACGAP1/LZTS2          |
| 5309 tags=40%,  | 115908/665GO_BP | CTHRC1/SOX4/MDK/SOX9/COL1A1/SRC/DAB2/BAI |
| 3211 tags=100%, | 22948/908/GO_BP | CCT5/CCT6A/CCT3/DKC1/CCT2/CCT4/CCT7/TCP  |
| 3211 tags=100%, | 22948/908/GO_BP | CCT5/CCT6A/CCT3/DKC1/CCT2/CCT4/CCT7/TCP  |
| 4405 tags=37%,  | 2810/5047/GO_BP | SFN/PAEP/TREM2/PYCARD/SOX4/MDK/E2F1/MMP  |
| 4728 tags=34%,  | 2539/4605/GO_BP | G6PD/MYBL2/EGLN3/NQO1/MDK/EPO/TYRO3/ATP  |
| 5309 tags=42%,  | 115908/665GO_BP | CTHRC1/SOX4/MDK/SOX9/COL1A1/SRC/DAB2/BAI |
| 1892 tags=62%,  | 5347/89958GO_BP | PLK1/SAPCD2/MISP/EPB41L2/GPSM2           |
| 6454 tags=49%,  | 29108/1053GO_BP | PYCARD/UBD/S100A4/IKBKE/LGALS9/ECT2/LGA  |
| 4127 tags=32%,  | 6696/3984/GO_BP | SPP1/LIMK1/SOX9/DBN1/POSTN/REG1A/PLXNA1  |
| 4398 tags=31%,  | 2539/4605/GO_BP | G6PD/MYBL2/EGLN3/NQO1/MDK/TYRO3/TYROBP/  |
| 2875 tags=26%,  | 6696/1364/GO_BP | SPP1/CLDN4/MMP9/MMP7/RGS2/SLC2A1/EPO/LG  |
| 5706 tags=48%,  | 6510/3576/GO_BP | SLC1A5/CXCL8/SLC52A2/KPNA2/CDK1/ICAM1/L  |
| 4258 tags=39%,  | 29108/3984GO_BP | PYCARD/LIMK1/ICAM1/ARPC1B/PFN2/ARL2/PSR  |
| 5182 tags=40%,  | 8877/991/5GO_BP | SPHK1/CDC20/PLK1/LIMK1/SOX4/UBE2S/TSPO/  |
| 6220 tags=52%,  | 79574/5909GO_BP | EPS8L3/RAP1GAP/KCTD17/ICAM1/ANLN/PFN2/R  |
| 6465 tags=50%,  | 4318/8162GO_BP  | MMP9/CDT1/CTHRC1/CDCA5/ANXA2/STMN1/LGAL  |
| 5960 tags=48%,  | 8877/302/1GO_BP | SPHK1/ANXA2/CORO1A/STX3/SNAP25/CPLX2/TA  |
| 6055 tags=49%,  | 2539/2056/GO_BP | G6PD/EPO/FCER1G/BAK1/SPI1/SLC7A11/PRMT1  |
| 3964 tags=33%,  | 54209/2910GO_BP | TREM2/PYCARD/CYBA/LY96/FCER1G/LGALS9/TS  |
| 5147 tags=48%,  | 10551/440/GO_BP | AGR2/ASNS/HSPB8/CXCL8/KDEL3/BAK1/STC2/   |
| 936 tags=47%,   | 9942/7367/GO_BP | XYLB/UGT2B17/UGT2B4/CRYL1/UGT2B7/DCXR/S  |
| 1326 tags=83%,  | 55902/128/GO_BP | ACSS2/ADH5/ALDH1B1/ALDH1A1/ALDH2/ADH6/A  |
| 1115 tags=53%,  | 23464/275/GO_BP | GCAT/AMT/SHMT1/RIDA/SDS/BAAT/AGXT2/AGXT  |
| 509 tags=75%,   | 1428/12368GO_BP | CRYM/HYKK/DLST/PHYKPL/AADAT/GCDH/ALDH7A  |
| 771 tags=71%,   | 55349/1384GO_BP | CHDH/CRAT/ALDH9A1/CPT1A/POR/BBOX1/ACADM  |
| 591 tags=67%,   | 26291/344/GO_BP | FGF21/APOC2/SORL1/PLIN5/GPLD1/AADAC/APO  |
| 1411 tags=50%,  | 5174/54407GO_BP | PDZK1/SLC38A2/SLC25A20/SLC22A3/SLC22A1/  |
| 936 tags=47%,   | 9942/7367/GO_BP | XYLB/UGT2B17/UGT2B4/CRYL1/UGT2B7/DCXR/S  |
| 838 tags=58%,   | 6469/344/3GO_BP | SHH/APOC2/APOC1/ABCG8/ABCG5/APOA2/APOC3  |
| 838 tags=58%,   | 6469/344/3GO_BP | SHH/APOC2/APOC1/ABCG8/ABCG5/APOA2/APOC3  |
| 692 tags=58%,   | 348/344/34GO_BP | APOE/APOC2/APOC1/APOA2/APOA1/APOA5/APOC  |
| 1063 tags=83%,  | 1071/348/3GO_BP | CETP/APOE/APOC2/LIPG/LIPC/APOA2/LCAT/AP  |
| 1099 tags=58%,  | 3067/3034/GO_BP | HDC/HAL/HNMT/MTHFD1/AMDHD1/FTCD/UROC1    |
| 457 tags=41%,   | 1551/64816GO_BP | CYP3A7/CYP3A43/CYP3A5/CYP1A2/CYP2C8/CYP  |
| 944 tags=58%,   | 3155/56898GO_BP | HMGCL/BDH2/ACSS3/ACAT1/BDH1/HMGCS2/SLC2  |
| 767 tags=50%,   | 79944/2805GO_BP | L2HGDH/GOT1/AADAT/GOT2/GPT2/PHYH/ADHFE1  |
| 767 tags=56%,   | 122970/280GO_BP | ACOT4/GOT1/ASPA/MTHFS/GLUL/GLUD1/GOT2/A  |
| 1184 tags=75%,  | 1191/23461GO_BP | CLU/ABCA5/CETP/APOE/APOC2/LIPG/APOM/LIP  |
| 1487 tags=81%,  | 122970/559GO_BP | ACOT4/ACSS2/PCCA/ACSM1/PCCB/MMAA/THNSL2  |
| 1099 tags=70%,  | 3067/3034/GO_BP | HDC/HAL/HNMT/MTHFD1/AMDHD1/FTCD/UROC1    |
| 898 tags=70%,   | 2184/2954/GO_BP | FAH/GSTZ1/HGD/IYD/PAH/HPD/TAT            |
| 3935 tags=28%,  | 5347/9232/GO_BP | PLK1/PTTG1/TOP2A/TRIP13/CDC25B/CKS2/CCN  |
| 6597 tags=51%,  | 56667/1033GO_BP | MUC13/B3GNT3/GCNT3/ST6GALNAC4/VEGFB/DPM  |
| 2996 tags=36%,  | 6364/2919/GO_BP | CCL20/CXCL1/TREM2/CXCL6/CXCL8/CXCL5/REG  |
| 2996 tags=36%,  | 6364/2919/GO_BP | CCL20/CXCL1/TREM2/CXCL6/CXCL8/CXCL5/REG  |
| 1429 tags=73%,  | 4496/4494/GO_BP | MT1H/MT1F/MT1B/ABCC2/SLC30A1/MT2A/MT1A/  |
| 3442 tags=41%,  | 6364/4192/GO_BP | CCL20/MDK/LGALS3/CSF1/S100A14/TGFB1/SLA  |
| 3195 tags=37%,  | 9212/2207/GO_BP | AURKB/FCER1G/LGALS9/LGALS3/ADA/CDKN2A/C  |
| 3964 tags=39%,  | 29108/1535GO_BP | PYCARD/CYBA/LY96/FCER1G/LGALS9/TYROBP/C  |

|                |                 |                                          |
|----------------|-----------------|------------------------------------------|
| 761 tags=50%,  | 875/23743/GO_BP | CBS/BHMT2/ADI1/MTHFD1/CTH/CD01/BHMT      |
| 804 tags=62%,  | 51449/875/GO_BP | PCYOX1/CBS/TST/CSAD/MAT1A/CTH/CD01/AGXT  |
| 656 tags=62%,  | 2/8547/222GO_BP | A2M/FCN3/FCN2/SERPING1/COLEC10/MBL2/MAS  |
| 922 tags=63%,  | 4942/23576GO_BP | OAT/DDAH1/NOS2/AGMAT/FAH/ASL/ART4/ASS1/  |
| 509 tags=69%,  | 1428/12368GO_BP | CRYM/HYKK/DLST/PHYKPL/AADAT/GCDH/ALDH7A  |
| 972 tags=64%,  | 275/55258/GO_BP | AMT/THNSL2/CBS/CSAD/SHMT1/SDS/DAO/CD01/  |
| 1343 tags=62%, | 1384/223/1GO_BP | CRAT/ALDH9A1/CPT1A/POR/BBOX1/ACADM/SHMT  |
| 1429 tags=69%, | 4496/4494/GO_BP | MT1H/MT1F/MT1B/MT2A/MT1A/MT1M/MT1G/MT1E, |
| 620 tags=38%,  | 320/6540/6GO_BP | APBA1/SLC6A13/SLC6A12/ABAT/SLC6A1        |
| 717 tags=79%,  | 1562/1573/GO_BP | CYP2C18/CYP2J2/CYP2A13/CYP4F12/EPHX2/CY  |
| 819 tags=69%,  | 9971/435/4GO_BP | NR1H4/ASL/ASS1/ARG1/NAGS/SLC25A15/OTC/C  |
| 1354 tags=71%, | 26063/1384GO_BP | DEC2/CRAT/ECI2/ACOX1/ACAA1/HSD17B4/AMA   |
| 1063 tags=86%, | 1071/348/3GO_BP | CETP/APOE/APOC2/LIPG/GPIHBP1/LIPC/APOB/  |
| 1063 tags=54%, | 1071/185/3GO_BP | CETP/AGTR1/APOE/LIPC/APOB/LPA/APOA2      |
| 905 tags=77%,  | 3949/81693GO_BP | LDLR/AMN/APOE/APOC2/LIPG/APOM/APOA2/GPL  |
| 1101 tags=23%, | 4040/367/5GO_BP | LRP6/AR/RBP4                             |
| 207 tags=64%,  | 2147/2160/GO_BP | F2/F11/SERPINF2/APOH/CPB2/KLKB1/F12/PLG, |
| 876 tags=71%,  | 9971/6821/GO_BP | NR1H4/SUOX/ASL/ASS1/ARG1/NAGS/SLC25A15/  |
| 1429 tags=69%, | 4496/4494/GO_BP | MT1H/MT1F/MT1B/MT2A/MT1A/MT1M/MT1G/MT1E, |
| 6060 tags=52%, | 7040/3956/GO_BP | TGFB1/LGALS1/ADA/EXO1/CLCF1/BATF/TFRC/M  |
| 6259 tags=58%, | 2207/3965/GO_BP | FCER1G/LGALS9/RAC2/CPLX2/LAT2/SYK/UNC13  |
| 6303 tags=60%, | 54209/9212GO_BP | TREM2/AURKB/FCER1G/SH3BP1/ITGAM/ITGB2/I  |
| 3465 tags=37%, | 29108/3965GO_BP | PYCARD/LGALS9/RIPK2/HAVCR2/HRAS/IL18/HL  |
| 425 tags=39%,  | 4482/23743GO_BP | MSRA/BHMT2/ADI1/MTHFD1/MAT1A/GNMT/BHMT   |
| 1049 tags=61%, | 2157/7450/GO_BP | F8/VWF/SERPING1/F2/F11/APOH/KLKB1/F12/F  |
| 1170 tags=72%, | 23461/1071GO_BP | ABCA5/CETP/APOE/APOC2/LIPG/APOM/LIPC/AP  |
| 555 tags=39%,  | 135/59272/GO_BP | ADORA2A/ACE2/AVPR1A/KMO/SLC38A3/ABAT/SL  |
| 3626 tags=39%, | 4318/2810/GO_BP | MMP9/SFN/PYCARD/BAK1/PLAUR/BAX/BMF/NOL3, |
| 3865 tags=48%, | 8877/29108GO_BP | SPHK1/PYCARD/TRAIP/GSTP1/BIRC3/SYK/CASP  |
| 3659 tags=36%, | 991/5347/1GO_BP | CDC20/PLK1/CDCA5/BUB1/BUB1B/FEN1/DSCC1/  |
| 5765 tags=62%, | 9454/8767/GO_BP | HOMER3/RIPK2/HAVCR2/PRNP/HDAC7/EZR/VTCN  |
| 5913 tags=55%, | 112399/606GO_BP | EGLN3/FKBP10/P3H1/FKBP1A/P4HA2/P3H3/PPI  |
| 1326 tags=75%, | 55902/6817GO_BP | ACSS2/SULT1A1/ADH5/SULT1A2/ALDH1B1/ALDH  |
| 6337 tags=51%, | 1869/55544GO_BP | E2F1/RBM38/IGF2BP1/YBX3/MAPKAPK2/DKC1/Y  |
| 3999 tags=51%, | 3614/7083/GO_BP | IMPDH1/TK1/DTYMK/ADA/UCK2/UPP1/NME1/NME  |
| 4824 tags=51%, | 6241/1869/GO_BP | RRM2/E2F1/RAD51/EZH2/CDC7/CHEK1/RHN01/R  |
| 4582 tags=59%, | 302/7040/8GO_BP | ANXA2/TGFB1/MTMR2/CLTA/VLDLR/CAPN1/MYLI  |
| 4824 tags=54%, | 6241/1869/GO_BP | RRM2/E2F1/RAD51/EZH2/CDC7/CHEK1/RHN01/R  |
| 3727 tags=53%, | 54209/4192GO_BP | TREM2/MDK/MMP14/CSF1/P2RX4/SLAMF8/CCL5/  |
| 4950 tags=35%, | 6690/10013GO_BP | SPINK1/CD24/TREM2/EPO/ICAM1/MELK/TYRO3/  |
| 4950 tags=35%, | 6690/10013GO_BP | SPINK1/CD24/TREM2/EPO/ICAM1/MELK/TYRO3/  |
| 3758 tags=37%, | 8877/6364/GO_BP | SPHK1/CCL20/PYCARD/CYBA/UBD/LCN2/CXCL8/  |
| 3510 tags=30%, | 2919/54209GO_BP | CXCL1/TREM2/PYCARD/CXCL6/LY96/LCN2/CXCL  |
| 3510 tags=30%, | 2919/29108GO_BP | CXCL1/PYCARD/CXCL6/LY96/LCN2/CXCL8/CXCL  |
| 6914 tags=57%, | 54913/827CGO_BP | RPP25/LAGE3/PUSL1/EEF1E1/TSEN54/GTF3C6/  |
| 5704 tags=48%, | 6659/3872/GO_BP | SOX4/KRT17/PTAFR/PRKCD/NCK2/LARP6/CDK4/  |
| 3964 tags=34%, | 54209/291CGO_BP | TREM2/PYCARD/CYBA/LY96/FCER1G/LGALS9/TS  |
| 3920 tags=78%, | 22948/908/GO_BP | CCT5/CCT6A/CCT3/RUVBL1/DKC1/CCT2/CCT4/N  |
| 1596 tags=32%, | 4318/10013GO_BP | MMP9/CD24/LIF/PROM1/PRKX/STAT1           |
| 380 tags=38%,  | 81620/9212GO_BP | CDT1/AURKB/CDK1/NDC80/TTK/RCC2           |
| 6680 tags=57%, | 4318/10551GO_BP | MMP9/AGR2/SOX9/SRC/PLAUR/TGFB1/RHBDF2/N  |

|                |                 |                                          |
|----------------|-----------------|------------------------------------------|
| 6181 tags=52%, | 3159/8318/GO_BP | HMGA1/CDC45/TGFB1/NUP62/DNMT1/TRIM28/SI  |
| 3505 tags=91%, | 22948/908/GO_BP | CCT5/CCT6A/CCT3/DKC1/CCT2/CCT4/CCT7/TCP  |
| 1488 tags=57%, | 549/593/64GO_BP | AUH/BCKDHA/MCCC2/DBT/HMGCL/HIBCH/HIBADH  |
| 1488 tags=57%, | 549/593/64GO_BP | AUH/BCKDHA/MCCC2/DBT/HMGCL/HIBCH/HIBADH  |
| 7272 tags=66%, | 891/10212/GO_BP | CCNB1/DDX39A/ALYREF/HSF1/CSTF2/SNRPA/UP  |
| 972 tags=52%,  | 275/4128/GO_BP  | AMT/MAOA/HNMT/POR/MAOB/ALDH7A1/SARDH/AL  |
| 717 tags=57%,  | 1562/1573/GO_BP | CYP2C18/CYP2J2/CYP2A13/CYP2A7/NR1I2/CYP  |
| 1115 tags=52%, | 23464/280GO_BP  | GCAT/GOT1/ASPA/AADAT/GOT2/GCDH/ALDH7A1/  |
| 1817 tags=73%, | 125061/19GO_BP  | AFMID/PAOX/CHDH/SAT2/SAT1/IDO2/HNMT/AAD  |
| 1056 tags=45%, | 2327/1644/GO_BP | FM02/DDC/AS3MT/CBS/ACAA1/CYP1A1/AKR7A3/  |
| 1036 tags=52%, | 116285/16GO_BP  | ACSM1/IDO2/AADAT/ACAA1/GOT2/TDO2/KMO/HA  |
| 6181 tags=57%, | 2810/1869/GO_BP | SFN/E2F1/RAC2/YWHAZ/MICALL2/SAE1/BID/UB  |
| 4608 tags=43%, | 6280/2919/GO_BP | S100A9/CXCL1/CXCL6/PGC/CXCL8/CXCL5/REG1  |
| 6353 tags=74%, | 25879/5764GO_BP | DCAF13/DHX37/NPM1/RRS1/RRP7A/RPSA/EMG1/  |
| 5147 tags=55%, | 10551/1101GO_BP | AGR2/KDEL3/BAK1/BAX/LMNA/DDX11/HYOU1/A   |
| 5169 tags=55%, | 6364/2910GO_BP  | CCL20/PYCARD/ICAM1/STK39/CCL5/SLC12A2/C  |
| 1474 tags=58%, | 338821/62GO_BP  | SLC01B7/RXRA/NR1H4/SLC01A2/ABCC2/STARD5  |
| 207 tags=35%,  | 948/2147/GO_BP  | CD36/F2/F7/SERPINF2/APOH/CPB2/F12/PLG/H  |
| 838 tags=36%,  | 6469/344/GO_BP  | SHH/APOC2/IRS2/APOC1/ABCG8/ABCG5/APOA2/  |
| 1121 tags=46%, | 8659/8776GO_BP  | ALDH4A1/GGACT/PCYOX1/MTHFS/HOGA1/GOT2/S  |
| 1024 tags=38%, | 1644/1693GO_BP  | DDC/IDO2/SRD5A1/AADAT/ACMSD/GCDH/TDO2/KI |
| 717 tags=52%,  | 1562/1592/GO_BP | CYP2C18/CYP26A1/BCO2/CYP3A7/CYP1A1/ALDH  |
| 1275 tags=48%, | 23411/37/GO_BP  | SIRT1/ACADVL/ERLIN1/ETFBKMT/ACACB/DGAT2  |
| 745 tags=38%,  | 196883/114GO_BP | ADCY4/ADCY8/FGF21/ADCY1/GJB2/ASS1/ARG1/  |
| 207 tags=35%,  | 948/2147/GO_BP  | CD36/F2/F7/SERPINF2/APOH/CPB2/F12/PLG/H  |
| 3729 tags=50%, | 4318/10551GO_BP | MMP9/AGR2/PLAUR/ADORA1/SHKBP1/NUP62/NCF  |
| 5500 tags=62%, | 4318/10551GO_BP | MMP9/AGR2/PLAUR/ADORA1/SHKBP1/NUP62/NCF  |
| 2688 tags=39%, | 29108/105GO_BP  | PYCARD/UBD/TGFB1/SPI1/HAVCR2/BATF/RELB/  |
| 4573 tags=49%, | 2810/3872/GO_BP | SFN/KRT17/NME2/PPARD/SULT2B1/TGFB2/VDR/  |
| 5125 tags=51%, | 6714/1601/GO_BP | SRC/DAB2/MTMR2/EZR/MSN/MAPK3/MAP2K2/ANK  |
| 3727 tags=53%, | 4192/3958/GO_BP | MDK/LGALS3/CSF1/SLAMF8/CKLF/CCL5/MIF/MA  |
| 3756 tags=50%, | 2810/1869/GO_BP | SFN/E2F1/BAK1/YWHAZ/BAX/HIP1R/BID/YWHAH  |
| 5456 tags=36%, | 8877/4318/GO_BP | SPHK1/MMP9/CD24/CCL20/PLK1/CCNB1/TREM2/  |
| 5182 tags=37%, | 6364/5909/GO_BP | CCL20/RAP1GAP/RGS2/RGS1/ICAM1/SH3BP1/FO  |
| 6856 tags=53%, | 3159/8318/GO_BP | HMGA1/CDC45/TGFB1/SPI1/PHF19/NUP62/EZH2  |
| 5045 tags=37%, | 56667/103GO_BP  | MUC13/B3GNT3/GCNT3/ST6GALNAC4/VEGFB/GAL  |
| 5045 tags=37%, | 56667/103GO_BP  | MUC13/B3GNT3/GCNT3/ST6GALNAC4/VEGFB/GAL  |
| 5182 tags=41%, | 8877/991/GO_BP  | SPHK1/CDC20/PLK1/LIMK1/SOX4/UBE2S/TSPO/  |
| 2875 tags=27%, | 6696/1364/GO_BP | SPP1/CLDN4/MMP9/MMP7/RGS2/SLC2A1/EPO/LG  |
| 3244 tags=41%, | 4318/7262/GO_BP | MMP9/PHLDA2/ANXA2/ADAM15/LEF1/LDOC1/LOX  |
| 6686 tags=49%, | 4192/2207/GO_BP | MDK/FCER1G/ICAM1/LGALS9/LGALS3/TGFB1/LG  |
| 3964 tags=33%, | 54209/291GO_BP  | TREM2/PYCARD/CYBA/LY96/FCER1G/LGALS9/TS  |
| 6603 tags=50%, | 54209/291GO_BP  | TREM2/PYCARD/CYBA/LY96/FCER1G/LGALS9/TS  |
| 4917 tags=42%, | 4192/2724GO_BP  | MDK/TNFRSF21/LGALS9/FOXJ1/TYRO3/LGALS3/  |
| 1040 tags=52%, | 51170/646GO_BP  | HSD17B11/SHH/CYP17A1/SRD5A1/HSD17B4/HSD  |
| 692 tags=44%,  | 348/344/GO_BP   | APOE/APOC2/APOM/APOC4/MTTP/APOB/APOC1/A  |
| 782 tags=56%,  | 5627/710/GO_BP  | PROS1/SERPING1/FGB/FGG/FGA/F2/F11/TMPRS  |
| 221 tags=41%,  | 3248/7907GO_BP  | HPGD/ELOVL6/ASAH2/EPHX2/CYP1A1/ACOT12/C  |
| 207 tags=33%,  | 948/2147/GO_BP  | CD36/F2/F7/SERPINF2/APOH/CPB2/F12/PLG/H  |
| 1429 tags=44%, | 4496/4494/GO_BP | MT1H/MT1F/MAP1LC3A/MT1B/MT2A/MT1A/MT1M/  |
| 697 tags=59%,  | 2157/7450/GO_BP | F8/VWF/SERPING1/F10/FGB/FGG/FGA/F2/F11/  |

|                                |                                          |
|--------------------------------|------------------------------------------|
| 7629 tags=65%, 2305/11602GO_BP | FOXM1/RMI2/RAD51/RAD51AP1/CHEK1/NPAS2/H  |
| 607 tags=44%, 5629/3295/GO_BP  | PROX1/HSD17B4/AMACR/AKR1C4/SCP2/CYP27A1, |
| 763 tags=47%, 80339/348/GO_BP  | PNPLA3/APOE/APOC2/LIPG/SORL1/PLIN5/LIPC, |
| 4398 tags=77%, 29108/578/GO_BP | PYCARD/BAK1/RIPK2/ASPH/PERP/IFI16/FADD/  |
| 2702 tags=62%, 10631/4241GO_BP | POSTN/MELTF/FBLN1/RCC2/EFNA5/CORO1C/ITG  |
| 6013 tags=46%, 6696/10631GO_BP | SPP1/POSTN/SEMA6A/MELTF/FBLN1/RCC2/ARHG  |
| 3359 tags=30%, 54209/302/GO_BP | TREM2/ANXA2/FCER1G/SRC/CSF1/TYROBP/TGFB  |
| 1277 tags=49%, 150094/116GO_BP | SIK1/MOGAT1/LDLR/PNPLA3/LPIN2/DGAT2/C3/  |
| 1277 tags=49%, 150094/116GO_BP | SIK1/MOGAT1/LDLR/PNPLA3/LPIN2/DGAT2/C3/  |
| 1270 tags=61%, 721/733/11GO_BP | C4B/C8G/CLU/C1RL/APCS/C1R/C2/C5/SERPING  |
| 1379 tags=42%, 10580/9852GO_BP | SORBS1/EPM2AIP1/SIRT1/IGF1/PPARA/KAT2B/  |
| 555 tags=33%, 135/8600/5GO_BP  | ADORA2A/TNFSF11/OXT/ACE2/AVPR1A/KMO/SLC  |
| 563 tags=42%, 54884/216/GO_BP  | RETSAT/ALDH1A1/DGAT2/RDH5/CYP1A1/RBP4/A  |
| 79 tags=9%, 12779/563/8GO_BP   | GNAT1/AZGP1/RTP3                         |
| 1277 tags=49%, 150094/116GO_BP | SIK1/MOGAT1/LDLR/PNPLA3/LPIN2/DGAT2/C3/  |
| 854 tags=31%, 1244/107/2GO_BP  | ABCC2/ADCY1/GJB2/ASS1/QDPR/ARG1/PFKFB1/  |
| 1397 tags=69%, 9481/23411GO_BP | SLC25A27/SIRT1/NR1H4/C1QTNF3/ANGPTL8/CE  |
| 1397 tags=69%, 9481/23411GO_BP | SLC25A27/SIRT1/NR1H4/C1QTNF3/ANGPTL8/CE  |
| 1320 tags=43%, 26291/1500GO_BP | FGF21/SIK1/LDLR/APOE/APOC2/SORL1/DGAT2/  |
| 6418 tags=56%, 4321/8767/GO_BP | MMP12/RIPK2/IRAK1/SYK/HMGB2/PRKDC/NFKB2, |
| 648 tags=45%, 6817/51170GO_BP  | SULT1A1/HSD17B11/HSD17B2/SULT1E1/HSD17B  |
| 1099 tags=59%, 3067/5092/GO_BP | HDC/PCBD1/IDO2/FAH/HAL/HNMT/GSTZ1/AADAT, |
| 1170 tags=62%, 23461/1071GO_BP | ABCA5/CETP/AGTR1/APOE/APOC2/LIPG/GPIHBP  |
| 936 tags=80%, 9942/51084GO_BP  | XYLB/CRYL1/DCXR/SORD                     |
| 5879 tags=49%, 3958/100/1GO_BP | LGALS3/ADA/CMTM3/PRNP/EZR/PHPT1/CD300A/  |
| 1099 tags=71%, 3067/5092/GO_BP | HDC/PCBD1/IDO2/FAH/HAL/HNMT/GSTZ1/AADAT, |
| 1170 tags=64%, 23461/1071GO_BP | ABCA5/CETP/AGTR1/APOE/APOC2/LIPG/GPIHBP  |
| 1170 tags=64%, 23461/1071GO_BP | ABCA5/CETP/AGTR1/APOE/APOC2/LIPG/GPIHBP  |
| 1999 tags=71%, 54443/9493GO_BP | ANLN/KIF23/ECT2/RACGAP1/RTKN             |
| 3750 tags=42%, 5347/891/9GO_BP | PLK1/CCNB1/CCNB2/CDK1/REEP4/SPAG4/CHMP4  |
| 984 tags=42%, 2729/4482/GO_BP  | GCLC/MSRA/PCYOX1/CBS/TST/BHMT2/ADI1/CSA  |
| 1428 tags=42%, 51660/5590GO_BP | MPC1/ACSS2/PDK2/MLYCD/HMGCS1/ACACB/NUDT  |
| 1264 tags=61%, 9971/8659/GO_BP | NR1H4/ALDH4A1/GCLC/HAL/GOT1/MTHFS/GLUL/  |
| 651 tags=28%, 727/3078/3GO_BP  | C5/CFHR1/CFHR2/C7/C8B/F2/GPLD1/C8A/CFHR  |
| 1493 tags=44%, 4792/4035/GO_BP | NFKBIA/LRP1/SIRT1/ABCA5/CETP/SHH/APOE/A  |
| 79 tags=8%, 12779/563/8GO_BP   | GNAT1/AZGP1/RTP3                         |
| 692 tags=39%, 348/344/55GO_BP  | APOE/APOC2/APOM/APOC4/MTTP/APOB/APOC1/A  |
| 783 tags=40%, 122970/790GO_BP  | ACOT4/ELOVL6/ACOT1/ACOT2/ELOVL2/ACOX1/A  |
| 1464 tags=33%, 8864/10580GO_BP | PER2/SORBS1/EPM2AIP1/IGF1/PGM1/AGL/ENPP  |
| 941 tags=24%, 57834/1583GO_BP  | CYP4F11/CYP11A1/CYP26A1/GC/CYP4F12/CYP2  |
| 1464 tags=33%, 8864/10580GO_BP | PER2/SORBS1/EPM2AIP1/IGF1/PGM1/AGL/ENPP  |
| 1197 tags=53%, 37/83752/2GO_BP | ACADVL/LONP2/MLYCD/ETFBKMT/PRKAG2/PPARA, |
| 883 tags=45%, 2166/80339GO_BP  | FAAH/PNPLA3/ABHD6/APOE/APOC2/LIPG/SORL1, |
| 883 tags=45%, 2166/80339GO_BP  | FAAH/PNPLA3/ABHD6/APOE/APOC2/LIPG/SORL1, |
| 1283 tags=50%, 7076/7040/GO_BP | TIMP1/TGFB1/HIF1A                        |
| 3069 tags=67%, 128869/940GO_BP | PIGU/PIGS/GPAA1/PIGT                     |
| 2 tags=17%, 6690 GO_BP         | SPINK1                                   |
| 2 tags=17%, 6690 GO_BP         | SPINK1                                   |



|                                |                                          |
|--------------------------------|------------------------------------------|
| 202 tags=33%, 29108/3965GO_BP  | PYCARD/LGALS9                            |
| 5207 tags=37%, 4318/10551GO_BP | MMP9/AGR2/CYBA/SOX9/NCF2/COL1A1/ARPC1B/  |
| 5671 tags=31%, 6690/5347/GO_BP | SPINK1/PLK1/CCNB1/PTTG1/PAFAH1B3/PAEP/G  |
| 6339 tags=47%, 6690/2539/GO_BP | SPINK1/G6PD/SFN/TESC/UCHL1/PLK1/CCNB1/P  |
| 4885 tags=39%, 115908/665GO_BP | CTHRC1/SOX4/MDK/SOX9/COL1A1/SULF1/SRC/I  |
| 6405 tags=50%, 7345/2635GO_BP  | UCHL1/HSPB8/SRC/ATP13A2/GAPDH/RIPK2/SQS  |
| 1488 tags=83%, 54511/549/GO_BP | HMGCLL1/AUH/MCCC2/HMGCL/IVD              |
| 6199 tags=51%, 1869/55544GO_BP | E2F1/RBM38/IGF2BP1/YBX3/MAPKAPK2/YBX1/P. |
| 4983 tags=49%, 3958/100/GO_BP  | LGALS3/ADA/PRNP/EZR/PHPT1/CD300A/THY1/L  |
| 4797 tags=36%, 6690/1001GO_BP  | SPINK1/CD24/TREM2/EPO/ICAM1/SRC/LIF/TGF  |
| 1784 tags=33%, 2207/3965/GO_BP | FCER1G/LGALS9/HAVCR2/SYK/VTCN1/CD86/ZP3. |
| 5482 tags=44%, 4318/7262/GO_BP | MMP9/PHLDA2/PLK1/CTHRC1/AURKB/ANXA2/STM  |
| 3798 tags=53%, 23636/5901GO_BP | NUP62/RAN/NUP210/NPM1/NUP93/NUP205/NUP3  |
| 7614 tags=58%, 55353/101GO_BP  | LAPTM4B/ARL4C/SQSTM1/YKT6/SCRIB/MICALL2. |
| 5726 tags=51%, 6364/10537GO_BP | CCL20/UBD/ICAM1/LGALS9/GAPDH/CD44/PTAFR. |
| 5147 tags=47%, 10551/440/GO_BP | AGR2/ASNS/HSPB8/CXCL8/KDEL3/BAK1/STC2/   |
| 7153 tags=57%, 4192/3965/GO_BP | MDK/LGALS9/FOXJ1/MMP14/TGFB1/RIPK2/ADA/  |
| 7150 tags=56%, 54997/542GO_BP  | TESC/TREM2/MDK/LGALS9/MMP14/LIF/CSF1/TY  |
| 2246 tags=60%, 10636/961GO_BP  | RGS14/RIN1/CDK5                          |
| 1885 tags=80%, 4192/3659/GO_BP | MDK/IRF1/CTLA4/LAG3                      |
| 6273 tags=50%, 4318/10551GO_BP | MMP9/AGR2/SOX9/SRC/PLAUR/TGFB1/RHBDF2/N  |
| 607 tags=38%, 5629/30/GO_BP    | PROX1/ACAA1/HSD17B4/AMACR/AKR1C4/SCP2/C  |
| 838 tags=40%, 4792/4035/GO_BP  | NFKBIA/LRP1/SIRT1/CETP/SHH/APOE/APOC2/L  |
| 838 tags=40%, 4792/4035/GO_BP  | NFKBIA/LRP1/SIRT1/CETP/SHH/APOE/APOC2/L  |
| 1275 tags=33%, 23411/37/GO_BP  | SIRT1/ACADVL/ERLIN1/PRKAG2/APOC2/AVPR1A. |
| 6249 tags=48%, 5347/891/GO_BP  | PLK1/CCNB1/CCNB2/GOLM1/CDK1/REEF4/SPAG4. |
| 6144 tags=48%, 8877/5347/GO_BP | SPHK1/PLK1/CDK1/TTK/TGFB1/RIPK2/S1PR2/P  |
| 4228 tags=42%, 1364/2810/GO_BP | CLDN4/SFN/STMN1/ELOVL1/GBA/FA2H/CYP26B1. |
| 3033 tags=43%, 113130/69GO_BP  | CDC45/BUB1/FEN1/ESPL1/NAA10/NSMCE2/DDX1  |
| 4451 tags=67%, 3614/100/GO_BP  | IMPDH1/ADA/NME1/NME2/AMD1/GMPS/IMPDH2/P  |
| 4451 tags=67%, 3614/100/GO_BP  | IMPDH1/ADA/NME1/NME2/AMD1/GMPS/IMPDH2/P  |
| 3787 tags=38%, 1364/2810/GO_BP | CLDN4/SFN/STMN1/ELOVL1/FA2H/CYP26B1/KDF  |
| 1115 tags=43%, 23464/27GO_BP   | GCAT/GCLC/AMT/THNSL2/CBS/TST/SEPSECS/CS. |
| 1170 tags=45%, 23461/1071GO_BP | ABCA5/CETP/AGTR1/APOE/APOC2/LIPG/GPIHBP  |
| 6128 tags=56%, 8767/8878/GO_BP | RIPK2/SQSTM1/IRAK1/PLCB1/PSMB9/PSMD14/P  |
| 1270 tags=46%, 721/733/GO_BP   | C4B/C8G/CLU/C1RL/APCS/C1R/C2/C5/SERPING  |
| 1363 tags=39%, 8600/3700/GO_BP | TNFSF11/ITIH4/F8/SERPINA1/APCS/EDNRB/ORI |
| 1214 tags=35%, 79071/4801GO_BP | ELOVL6/NFYB/ERLIN1/CYP51A1/SOD1/HMGCS1/. |
| 1214 tags=35%, 79071/4801GO_BP | ELOVL6/NFYB/ERLIN1/CYP51A1/SOD1/HMGCS1/. |
| 4980 tags=47%, 10551/542GO_BP  | AGR2/TREM2/ITGA3/ARHGEF16/LYPD1/LGALS3/  |
| 2996 tags=35%, 6364/2919/GO_BP | CCL20/CXCL1/TREM2/CXCL6/CXCL8/CXCL5/TFF. |
| 1317 tags=44%, 6714/9181/GO_BP | SRC/ARHGEF2/HCK/ASAP1/FSCN1/MSN/SH3PXD2  |
| 3964 tags=37%, 29108/153GO_BP  | PYCARD/CYBA/LY96/FCER1G/LGALS9/TYROBP/C  |
| 7545 tags=70%, 10538/569GO_BP  | BATF/PSMB9/PSMD14/TCF3/PSMD2/PSMB2/PSME. |
| 3266 tags=54%, 54209/73GO_BP   | TREM2/TYROBP/HAVCR2/SYK/GRN/SBN02/LBP    |
| 4451 tags=77%, 3614/4830/GO_BP | IMPDH1/NME1/NME2/GMPS/IMPDH2/NME6/NME7/  |
| 307 tags=7%, 1 3976 GO_BP      | LIF                                      |
| 2790 tags=36%, 5347/983/GO_BP  | PLK1/CDK1/SRC/LIF/ECT2/TGFB1/FLNA/PRKCD. |
| 4863 tags=49%, 27242/396GO_BP  | TNFRSF21/LGALS9/FOXJ1/TYROBP/TGFB1/GPNM  |
| 2904 tags=67%, 6280/5880/GO_BP | S100A9/RAC2/CD44/S100A8/MSN/IL1B/STK10/  |
| 4662 tags=43%, 55353/553GO_BP  | LAPTM4B/PPT1/CORO1A/GRN/RAB34/TMEM165/R  |

|                                |                                         |
|--------------------------------|-----------------------------------------|
| 4662 tags=43%, 55353/5538GO_BP | LAPTM4B/PPT1/CORO1A/GRN/RAB34/TMEM165/R |
| 575 tags=55%, 54209/3684GO_BP  | TREM2/ITGAM/DKK1/C1QB/C1QC/C1QA         |
| 5456 tags=36%, 8877/4318/GO_BP | SPHK1/MMP9/CD24/CCL20/PLK1/CCNB1/TREM2/ |
| 6306 tags=44%, 100133941/GO_BP | CD24/CCNB1/TPX2/CDC6/EP0/DUSP9/CDK1/CDC |
| 2511 tags=43%, 3321/6662/GO_BP | IGSF3/SOX9/FGFR2                        |
| 7250 tags=56%, 991/7345/GO_BP  | CDC20/UCLH1/CDK1/CCNA2/BIRC3/CDC25A/PSM |
| 6055 tags=49%, 4318/2810/GO_BP | MMP9/SFN/TREM2/PYCARD/E2F1/BAK1/TSP0/PL |
| 6296 tags=48%, 5347/79734GO_BP | PLK1/KCTD17/SRC/ARHGEF2/NUP62/HCK/SPAG5 |
| 3631 tags=37%, 991/9319/GO_BP  | CDC20/TRIP13/LIF/TTK/PLCB1/FBX05/CALR/M |
| 2852 tags=37%, 54209/7308GO_BP | TREM2/TYROBP/GDF15/ADAM9/CD53/FLOT1/EHD |
| 7568 tags=64%, 6662/8463/GO_BP | SOX9/TEAD2/PSMB9/PSMD14/TRIM6/TCF3/PSMD |
| 1763 tags=35%, 2861/5409/GO_BP | GPR37/PNMT/NR4A2/EPAS1/NPR1/SULT1A1/HDC |
| 1763 tags=35%, 2861/5409/GO_BP | GPR37/PNMT/NR4A2/EPAS1/NPR1/SULT1A1/HDC |
| 381 tags=34%, 2166/1562/GO_BP  | FAAH/CYP2C18/CYP2J2/CYP2A13/CYP4F12/EPH |
| 967 tags=24%, 9693/343/GO_BP   | RAPGEF2/AQP8/FDX1/SRD5A1/ASS1/PDE2A/ITP |
| 692 tags=31%, 5243/135/GO_BP   | ABCB1/ADORA2A/TNFSF11/OXT/APOE/ACE2/AVP |
| 1781 tags=29%, 6696/3976/GO_BP | SPP1/LIF/STC2/CTSV/BSG/MAPK3/PPARD      |
| 2776 tags=46%, 1410/578/GO_BP  | CRYAB/BAK1/SPI1/SCRIB/HNF1B/BAX/LEF1/JA |
| 1270 tags=58%, 721/733/11GO_BP | C4B/C8G/CLU/C1R/C2/PROS1/C5/SERPING1/C1 |
| 644 tags=40%, 100/134 GO_BP    | ADA/ADORA1                              |
| 5255 tags=71%, 302/5538/GO_BP  | ANXA2/PPT1/S100A10/FLOT2/CD2/NPC1/FLOT1 |
| 1170 tags=42%, 23461/1071GO_BP | ABCA5/CETP/AGTR1/APOE/APOC2/LIPG/GPIHBP |
| 1115 tags=39%, 23464/4482GO_BP | GCAT/MSRA/THNSL2/GOT1/ASPA/AADAT/ASS1/G |
| 508 tags=33%, 4494/4490/GO_BP  | MT1F/MT1B/CA2/ASS1/MT2A/MT1A/MT1M/HAMP/ |
| 1270 tags=59%, 721/733/11GO_BP | C4B/C8G/CLU/C1R/C2/PROS1/C5/SERPING1/C1 |
| 1160 tags=38%, 6303/3067/GO_BP | SAT1/HDC/DDC/AGMAT/IDO2/MAOA/NAHA/HNMT/ |
| 782 tags=38%, 5627/348/GO_BP   | PROS1/APOE/SERPING1/VTN/FGB/FGG/PROC/FG |
| 905 tags=35%, 3949/948/GO_BP   | LDLR/CD36/AMN/APOE/APOC2/LIPG/GPIHBP1/A |
| 1741 tags=62%, 326625/258GO_BP | MMAB/MMACHC/PNPO/MMAA/RGN               |
| 867 tags=29%, 6799/219/GO_BP   | SULT1A2/ALDH1B1/APOE/SULT1E1/TKFC/SULT1 |
| 1524 tags=32%, 7048/825/GO_BP  | TGFBF2/CAPN3/SELP/RREB1/KANK1/CD36/MYLK |
| 782 tags=38%, 5627/348/GO_BP   | PROS1/APOE/SERPING1/VTN/FGB/FGG/PROC/FG |
| 1026 tags=73%, 5092/2184/GO_BP | PCBD1/FAH/GSTZ1/QDPR/HGD/PAH/HPD/TAT    |
| 3655 tags=56%, 9212/100/GO_BP  | AURKB/ADA/CD74/BAX/MIF/SLC39A10/NOC2L/L |
| 4080 tags=77%, 3925/2291GO_BP  | STMN1/MAPRE1/MAP2/TUBB4A/FKBP4/INPP5J/C |
| 3149 tags=57%, 1058/1063/GO_BP | CENPA/CENPF/CENPH/CENPW/CENPE/CENPK/RNF |
| 3852 tags=57%, 3561/6850/GO_BP | IL2RG/SYK/JAK3/SHC1/IL2RA/IL2RB/PTPN2/S |
| 2803 tags=64%, 3561/2182/GO_BP | IL2RG/ACSL4/IL15RA/PLCB1/JAK3/SHC1/IL15 |
| 2020 tags=54%, 1601/2294GO_BP  | DAB2/DKK1/GPC3/MLLT3/CSNK1E/PLEKHA4/CSN |
| 6181 tags=59%, 2810/1869/GO_BP | SFN/E2F1/RAC2/YWHAZ/MICALL2/SAE1/BID/UB |
| 1586 tags=50%, 29108/2724GO_BP | PYCARD/TNFRSF21/LGALS9/ISG15/F2RL1      |
| 692 tags=78%, 348/344/3GO_BP   | APOE/APOC2/GPIHBP1/APOB/APOA2/APOA1/APO |
| 944 tags=78%, 3155/5689GO_BP   | HMGCL/BDH2/ACSS3/ACAT1/BDH1/HMGCS2/SLC2 |
| 782 tags=37%, 5627/348/GO_BP   | PROS1/APOE/SERPING1/VTN/FGB/FGG/PROC/FG |
| 951 tags=44%, 26291/1547GO_BP  | FGF21/FMC1/LONP2/MLYCD/ETFBKMT/LDLR/PPA |
| 2567 tags=58%, 6790/7283/GO_BP | AURKA/TUBG1/ASPM/ESPL1/PPP2R1A/FBX05/TU |
| 3852 tags=67%, 3561/6850/GO_BP | IL2RG/SYK/JAK3/SHC1/IL2RA/IL2RB/PTPN2/S |
| 3505 tags=83%, 22948/908/GO_BP | CCT5/CCT6A/CCT3/DKC1/CCT2/CCT4/CCT7/TCP |

|                 |                 |                                          |
|-----------------|-----------------|------------------------------------------|
| 4291 tags=29%,  | 6692/6280/GO_BP | SPINT1/S100A9/TREM2/LIMK1/RGS2/MDK/E2F1, |
| 6479 tags=40%,  | 6696/7345/GO_BP | SPP1/UCHL1/S100A6/RAP1GAP/LIMK1/MDK/DBN  |
| 5313 tags=33%,  | 6696/991/GO_BP  | SPP1/CDC20/S100A9/LIMK1/RGS2/MDK/SOX9/E  |
| 6479 tags=39%,  | 6696/7345/GO_BP | SPP1/UCHL1/S100A6/RAP1GAP/LIMK1/MDK/DBN  |
| 6062 tags=48%,  | 6280/56667GO_BP | S100A9/MUC13/CRP/PYCARD/CYBA/LIMK1/LY96, |
| 6706 tags=51%,  | 5997/6659/GO_BP | RGS2/SOX4/GAPDH/IGF2BP2/TYMS/KRT17/EIF4  |
| 3776 tags=34%,  | 6690/4318/GO_BP | SPINK1/MMP9/SFN/SPINT1/S100A9/EGLN3/BIR  |
| 6056 tags=41%,  | 6280/6364/GO_BP | S100A9/CCL20/CRP/TREM2/PYCARD/CYBA/CXCL  |
| 6227 tags=44%,  | 6696/2539/GO_BP | SPP1/G6PD/SPHK1/SFN/S100A9/CYBA/LIMK1/R  |
| 3076 tags=38%,  | 9212/3965/GO_BP | AURKB/LGALS9/LGALS3/ADA/CD74/JAK3/CCL5/I |
| 7250 tags=56%,  | 991/7345/GO_BP  | CDC20/UCHL1/CDK1/CCNA2/BIRC3/CDC25A/PSM  |
| 5045 tags=37%,  | 56667/103GO_BP  | MUC13/B3GNT3/GCNT3/ST6GALNAC4/VEGFB/B4G, |
| 3631 tags=33%,  | 5047/9319/GO_BP | PAEP/TRIP13/SULF1/TIMP1/LIF/TTK/ADA/ZP3, |
| 4121 tags=31%,  | 9212/9833/GO_BP | AURKB/MELK/NEK2/TYRO3/SRC/ATP13A2/TTK/A  |
| 4012 tags=28%,  | 6280/6364/GO_BP | S100A9/CCL20/CRP/TREM2/PYCARD/CYBA/CXCL  |
| 555 tags=25%,   | 8864/135/GO_BP  | PER2/ADORA2A/TNFSF11/OXT/ACE2/AVPR1A/IR  |
| 5356 tags=43%,  | 4192/2724GO_BP  | MDK/TNFRSF21/LGALS9/FOXJ1/TYRO3/LGALS3/  |
| 5011 tags=40%,  | 2810/7345/GO_BP | SFN/UCHL1/PLK1/PYCARD/PKIB/RGS2/DUSP9/G  |
| 917 tags=67%,   | 125061/16GO_BP  | AFMID/IDO2/AADAT/ACMSD/GCDH/TDO2/KMO/HA  |
| 1024 tags=53%,  | 125061/164GO_BP | AFMID/DDC/IDO2/AADAT/ACMSD/GCDH/TDO2/KM  |
| 692 tags=42%,   | 348/1593/GO_BP  | APOE/CYP27A1/CYP39A1/AKR1D1/CYP7A1       |
| 1277 tags=47%,  | 150094/394GO_BP | SIK1/LDLR/DGAT2/C3/PLIN5/GPLD1/RGN/THRS  |
| 692 tags=42%,   | 348/1593/GO_BP  | APOE/CYP27A1/CYP39A1/AKR1D1/CYP7A1       |
| 5073 tags=58%,  | 3310/2280/GO_BP | HSPA6/FKBP1A/HSPA8/PPIH/PPIA/DNAJB2/DNA  |
| 884 tags=50%,   | 1376/5142GO_BP  | CPT2/PRKAG2/ACACB/SLC25A20/CPT1A/IRS2/T  |
| 6034 tags=49%,  | 8877/302/GO_BP  | SPHK1/ANXA2/CDK1/BAK1/CORO1A/STX3/SNAP2  |
| 5206 tags=64%,  | 6714/5880/GO_BP | SRC/RAC2/TWF2/FSCN1/CARMIL1/WASF2/CORO1  |
| 5598 tags=64%,  | 1601/9094/GO_BP | DAB2/UNC119/FCHD1/DNAJC6/CLTA/GPR107/PI  |
| 905 tags=70%,   | 4035/3949/GO_BP | LRP1/LDLR/CD36/STARD5/APOA2/APOA1/APOC3  |
| 731 tags=60%,   | 51390/660GO_BP  | AIG1/CYP4F12/ACADL/CYP4F3/CYP4F2/CYP4A1  |
| 854 tags=40%,   | 1244/210/GO_BP  | ABCC2/ALAD/AQP9/TAT                      |
| 207 tags=70%,   | 7056/2147/GO_BP | THBD/F2/SERPINF2/APOH/CPB2/PLG/HRG       |
| 905 tags=70%,   | 4035/3949/GO_BP | LRP1/LDLR/CD36/STARD5/APOA2/APOA1/APOC3  |
| 4013 tags=40%,  | 2810/2910GO_BP  | SFN/PYCARD/E2F1/IKBKE/BAK1/CD44/CD74/BC  |
| 3702 tags=40%,  | 4318/4316/GO_BP | MMP9/MMP7/MMP12/COL1A1/MMP11/MMP14/P3H4, |
| 761 tags=40%,   | 875/6470/GO_BP  | CBS/SHMT1/MTHFD1/AGXT2/CTH/AGXT          |
| 1275 tags=53%,  | 23411/37/GO_BP  | SIRT1/ACADVL/ERLIN1/ACADL/APOC1/INSIG1/I |
| 1796 tags=53%,  | 3643/1058GO_BP  | INSR/SORBS1/EPM2AIP1/IGF1/IRS1/IRS2/GCK, |
| 1429 tags=67%,  | 4496/4494/GO_BP | MT1H/MT1F/MT1B/SLC30A1/MT2A/MT1A/MT1M/M  |
| 3648 tags=34%,  | 8877/1728/GO_BP | SPHK1/NQO1/PYCR1/LCN2/CDK1/SRC/MAPK13/E  |
| 3625 tags=100%, | 5973/10007GO_BP | RENBP/GNPDA1/NPL/NAGK/GNPDA2/AMDHD2      |
| 4228 tags=39%,  | 55723/4751GO_BP | ASF1B/NEK2/GINS1/TM4SF1/ADA/CMTM3/ELF3/I |
| 3756 tags=38%,  | 4316/1535/GO_BP | MMP7/CYBA/SOX9/SLC2A1/COL1A1/BAK1/ATP1A  |
| 651 tags=79%,   | 735/5199/GO_BP  | C9/CFP/C8G/C5/CFB/C3/CFH/C7/C8B/C8A/CFH  |
| 1379 tags=30%,  | 10580/985GO_BP  | SORBS1/EPM2AIP1/SIRT1/IGF1/PPARA/GPER1/I |
| 1295 tags=32%,  | 2098/6817/GO_BP | ESD/SULT1A1/ADH5/SULT1A2/PRDX3/HBA2/ALD  |
| 692 tags=43%,   | 348/55937/GO_BP | APOE/APOM/APOA2/LCAT/APOA1/APOA5         |
| 1196 tags=47%,  | 29881/394GO_BP  | NPC1L1/LDLR/ASAH2/CD36/ABCG8/ABCG5/APOA  |
| 854 tags=21%,   | 1244/2706/GO_BP | ABCC2/GJB2/FAM107A/FOXO1/ERRFI1/SRD5A1/I |
| 1264 tags=38%,  | 9971/79071GO_BP | NR1H4/ELOVL6/ACADVL/NFYB/ERLIN1/CYP51A1, |
| 905 tags=47%,   | 26291/394GO_BP  | FGF21/LDLR/APOC2/DGAT2/PLIN5/GPLD1/AADA  |

|                |                 |                                          |
|----------------|-----------------|------------------------------------------|
| 4950 tags=43%, | 4323/7040/GO_BP | MMP14/TGFB1/ADA/CLCF1/CD74/IGLL5/SYK/CD  |
| 7545 tags=73%, | 5698/1021GO_BP  | PSMB9/PSMD14/TCF3/PSMD2/PSMB2/PSME3/CBF  |
| 5188 tags=52%, | 2305/1160GO_BP  | FOXO1/RMI2/RAD51/RAD51AP1/CHEK1/HSF1/SI  |
| 951 tags=56%,  | 83752/2341GO_BP | LONP2/MLYCD/ETFBKMT/PPARA/ACACB/CPT1A/I  |
| 5212 tags=40%, | 8877/6510/GO_BP | SPHK1/SLC1A5/FXYD2/CRP/TREM2/SLC38A1/PY  |
| 4367 tags=32%, | 6696/226GO_BP   | SPP1/ALDOA/LIMK1/MDK/DBN1/ICAM1/POSTN/R  |
| 6306 tags=44%, | 100133941/GO_BP | CD24/CCNB1/TPX2/CDC6/EP0/DUSP9/CDK1/CDC  |
| 3313 tags=34%, | 8877/2583/GO_BP | SPHK1/B4GALNT1/GAL3ST1/PRKCD/ELOVL1/B4G  |
| 5992 tags=31%, | 2810/3880/GO_BP | SFN/KRT19/SOX9/TGM3/KRT23/FABP5/DSG2/CT  |
| 1942 tags=43%, | 6280/4192/GO_BP | S100A9/MDK/ITGB2/SLAMF8/S100A8/ADAM8     |
| 2087 tags=54%, | 54498/672GO_BP  | SMOX/SRM/SMS/OAZ1/ODC1/AMD1/OAZ3         |
| 3727 tags=71%, | 4192/1435/GO_BP | MDK/CSF1/CCL5/MAPK3/C3AR1/C5AR1/CMKLR1/I |
| 2068 tags=36%, | 54997/714/GO_BP | TESC/C1QC/LEF1/EVI2B/HCLS1               |
| 6303 tags=60%, | 54209/921GO_BP  | TREM2/AURKB/FCER1G/SH3BP1/ITGAM/ITGB2/I  |
| 1918 tags=40%, | 8767/3606/GO_BP | RIPK2/IL18/ALOX5/IL18BP                  |
| 4531 tags=83%, | 891/4751/GO_BP  | CCNB1/NEK2/ECT2/RCC2/RACGAP1/SPAG5/KNST  |
| 3928 tags=39%, | 226/3383GO_BP   | ALDOA/ICAM1/FBLIM1/PLXNA1/BAMBI/RHOV/CO  |
| 6229 tags=49%, | 7345/24137GO_BP | UCHL1/KIF4A/KIF23/CEP131/HSPB1/WDR34/IF  |
| 6229 tags=49%, | 7345/24137GO_BP | UCHL1/KIF4A/KIF23/CEP131/HSPB1/WDR34/IF  |
| 3703 tags=31%, | 8877/4318/GO_BP | SPHK1/MMP9/NQO1/APOA4/PYCR1/LCN2/CDK1/S  |
| 6169 tags=46%, | 8877/5347/GO_BP | SPHK1/PLK1/CDK1/TTK/TGFB1/RIPK2/S1PR2/P  |
| 6686 tags=47%, | 5047/5420GO_BP  | PAEP/TREM2/PYCARD/CYBA/FCER1G/LGALS9/FO  |
| 1585 tags=44%, | 100133941/GO_BP | CD24/LAPTM4B/TYROBP/HSP90AB1             |
| 1511 tags=55%, | 699/701/8GO_BP  | BUB1/BUB1B/NAA10/SGO2/PPP2R1A/SGO1       |
| 767 tags=40%,  | 116255/28GO_BP  | MOGAT1/GOT1/TKFC/DGAT2/PCK2/ANGPTL3/MOG  |
| 1409 tags=45%, | 2098/9446/GO_BP | ESD/GSTO1/MGST1/MGST2/GSTM5/GSTZ1/GSTA2  |
| 1409 tags=45%, | 2098/9446/GO_BP | ESD/GSTO1/MGST1/MGST2/GSTM5/GSTZ1/GSTA2  |
| 6436 tags=63%, | 5570/9212/GO_BP | PKIB/AURKB/NEK2/SRC/PIF1/MAPK3/DKC1/ACD  |
| 3385 tags=27%, | 6692/5420GO_BP  | SPINT1/TREM2/MDK/TNFRSF21/E2F1/CDK1/TSP  |
| 1115 tags=60%, | 23464/1024GO_BP | GCAT/RIDA/SDS                            |
| 1251 tags=80%, | 116085/107GO_BP | SLC22A12/SLC17A3/SLC2A9/SLC17A1          |
| 1115 tags=60%, | 23464/1024GO_BP | GCAT/RIDA/SDS                            |
| 4927 tags=50%, | 5347/22974GO_BP | PLK1/TPX2/TACC3/PSRC1/NUP62/SPAG5/CHMP4  |
| 3798 tags=53%, | 23636/5901GO_BP | NUP62/RAN/NUP210/NUP93/NUP205/NUP37/NDC  |
| 3798 tags=53%, | 23636/5901GO_BP | NUP62/RAN/NUP210/NUP93/NUP205/NUP37/NDC  |
| 8602 tags=76%, | 56648/6387GO_BP | E1F5A2/MRPL17/MRPS12/MRPL47/MRPL9/MRPS2  |
| 6303 tags=69%, | 9212/1011GO_BP  | AURKB/KIF20A/CEP55/ANLN/KIF23/ECT2/RACG  |
| 4496 tags=52%, | 4582/9099GO_BP  | MUC1/CREB3L1/HSF1/DDIT3/HIF1A/MT3/ATF4/I |
| 3626 tags=45%, | 4318/2910GO_BP  | MMP9/PYCARD/BAK1/PLAUR/BAX/BMF/BID/BBC3  |
| 909 tags=35%,  | 8864/1058GO_BP  | PER2/SORBS1/EPM2AIP1/IGF1/PYGL/PGM1/PRK  |
| 1020 tags=25%, | 286256/137GO_BP | LCN12/CPT2/PRKAG2/CD36/ACACB/SLC25A20/A  |
| 831 tags=39%,  | 55258/435/GO_BP | THNSL2/ASL/GOT1/CBS/GLUL/GLUD1/GAMT/ASS  |
| 1524 tags=29%, | 7048/4035/GO_BP | TGFB2/LRP1/CAPN3/SELP/RREB1/KANK1/CD36   |
| 7379 tags=64%, | 4192/3965/GO_BP | MDK/LGALS9/MMP14/TGFB1/RIPK2/ADA/CD74/S  |
| 4262 tags=50%, | 3880/1065GO_BP  | KRT19/SPINT2/LIF/MDF1/ST14/E2F8/KRT8/AS  |
| 6100 tags=49%, | 3838/1160GO_BP  | KPNA2/RMI2/TGFB1/RAD51/CLCF1/RAD51AP1/A  |
| 1409 tags=35%, | 2207/3965/GO_BP | FCER1G/LGALS9/HAVCR2/SYK/CD86/ZP3/CD3E/I |
| 4626 tags=52%, | 116372/16GO_BP  | LYPD1/DAB2/SAPCD2/TGFB1/RHOQ/PKDCC/AP2M  |
| 1056 tags=32%, | 2327/1644/GO_BP | FMO2/DDC/RAPGEF2/BDH2/AS3MT/ABCC2/CBS/C  |
| 905 tags=34%,  | 3949/2166/GO_BP | LDLR/FAAH/PNPLA3/ABHD6/APOE/APOC2/LIPG/I |
| 634 tags=25%,  | 221037/25GO_BP  | JMJD1C/MMACHC/PHF8/UTY/CYP51A1/KDM5D/PO  |

|                |                 |                                          |
|----------------|-----------------|------------------------------------------|
| 854 tags=22%,  | 1244/2706/GO_BP | ABCC2/GJB2/GPER1/FAM107A/FOXO1/ERRFI1/S  |
| 3359 tags=30%, | 8877/4318/GO_BP | SPHK1/MMP9/TREM2/BACE2/CTSC/TYROBP/ITGA  |
| 5212 tags=41%, | 8877/1401/GO_BP | SPHK1/CRP/TREM2/PYCARD/LGALS3BP/CYBA/LI  |
| 5109 tags=28%, | 6690/891/GO_BP  | SPINK1/CCNB1/PTTG1/PAFAH1B3/PAEP/GTSF1/  |
| 6242 tags=48%, | 8877/5997/GO_BP | SPHK1/RGS2/SOX4/ATP13A2/GAPDH/IGF2BP2/T  |
| 6358 tags=49%, | 10551/440/GO_BP | AGR2/ASNS/CXCL8/KDELRL3/BAK1/TRIB3/STC2/ |
| 6695 tags=49%, | 100133941/GO_BP | CD24/LAPTM4B/TREM2/PYCARD/TNFRSF21/HOME  |
| 4786 tags=45%, | 100133941/GO_BP | CD24/SRC/LGALS1/CD320/CD86/VAV1/EFNB1/C  |
| 3939 tags=30%, | 1364/706/GO_BP  | CLDN4/TSP0/CLIC1/FXYD3/TTYH3/SLC34A2/AN  |
| 6686 tags=46%, | 5047/5420GO_BP  | PAEP/TREM2/PYCARD/CYBA/FCER1G/LGALS9/FO  |
| 4210 tags=42%, | 3675/2862GO_BP  | ITGA3/TPRN/PRNP/ITPKA/C1QL1/MTMR2/DLG3/  |
| 5037 tags=37%, | 578/4323/GO_BP  | BAK1/MMP14/CMTM7/LGALS1/ADA/CLCF1/SLAMF  |
| 2818 tags=54%, | 1277/1287/GO_BP | COL1A1/COL4A5/SYK/DDR1/UBASH3B/ITGA2/CO  |
| 4616 tags=69%, | 11004/816GO_BP  | KIF2C/CDT1/NUF2/NDC80/CENPE/BOD1/HNRNPU  |
| 7076 tags=65%, | 29108/102GO_BP  | PYCARD/TRAIP/RIPK2/RELB/HMGB2/SIRPA/IRF  |
| 4830 tags=50%, | 5984/5151GO_BP  | RFC4/DTL/POLD1/MAD2L2/ISG15/BRCA1/PCNA/  |
| 3362 tags=53%, | 6280/3934/GO_BP | S100A9/LCN2/S100A8/FTH1/SRI/FTL/AP3D1/S  |
| 2352 tags=53%, | 960/972/GO_BP   | CD44/CD74/MUC1/ZNF385A/MIF/BCL2L12/KDM1  |
| 5488 tags=47%, | 6659/3872/GO_BP | SOX4/KRT17/PTAFR/NCK2/LARP6/CDK4/YBX3/E  |
| 909 tags=35%,  | 8864/1058GO_BP  | PER2/SORBS1/EPM2AIP1/IGF1/PYGL/PGM1/PRK  |
| 909 tags=35%,  | 8864/1058GO_BP  | PER2/SORBS1/EPM2AIP1/IGF1/PYGL/PGM1/PRK  |
| 1317 tags=50%, | 6714/5080GO_BP  | SRC/ASAP1/FSCN1/MSN/LCP1                 |
| 3318 tags=58%, | 330/83596/GO_BP | BIRC3/BCL2L12/NOL3/BIRC7/CST7/CARD16/CA  |
| 3318 tags=58%, | 330/83596/GO_BP | BIRC3/BCL2L12/NOL3/BIRC7/CST7/CARD16/CA  |
| 2938 tags=59%, | 6714/1601/GO_BP | SRC/DAB2/MTMR2/EZR/MSN/MAPK3/MAP2K2/CHM  |
| 6566 tags=47%, | 6696/3984/GO_BP | SPP1/LIMK1/DBN1/SEMA6A/ARHGAP4/TNFRSF12  |
| 1252 tags=26%, | 286410/584GO_BP | ATP11C/PCTP/CETP/LDLR/APOE/APOC2/GLTPD2  |
| 4258 tags=40%, | 23616/230GO_BP  | SH3BP1/FOXJ1/DLG3/SCRIB/FSCN1/MTCL1/MSN  |
| 4258 tags=40%, | 23616/230GO_BP  | SH3BP1/FOXJ1/DLG3/SCRIB/FSCN1/MTCL1/MSN  |
| 3428 tags=73%, | 9536/5730/GO_BP | PTGES/PTGDS/AKR1C3/PTGES2/PTGS1/TBXAS1/  |
| 6656 tags=54%, | 4192/2724GO_BP  | MDK/TNFRSF21/LGALS9/FOXJ1/LGALS3/TGFB1/  |
| 1817 tags=76%, | 125061/19GO_BP  | AFMID/PAOX/CHDH/SAT2/SAT1/IDO2/HNMT/AAD  |
| 591 tags=52%,  | 55908/344/GO_BP | ANGPTL8/APOC2/GPIHBP1/ANGPTL4/PCSK6/LIP  |
| 4663 tags=50%, | 2810/1869/GO_BP | SFN/E2F1/YWHAZ/BAX/BMF/BID/YWHAH/BBC3/PI |
| 2626 tags=29%, | 6696/3976/GO_BP | SPP1/LIF/STC2/CTSV/BSG/MAPK3/PPARD/LDOC  |
| 1221 tags=38%, | 51071/237GO_BP  | DERA/SHPK/RBKS/ESD/PDXP/ADH5/ALDH4A1/PN  |
| 1354 tags=58%, | 26063/1384GO_BP | DECR2/CRAT/ETFA/DECR1/ACADVL/HADHB/ECH1  |
| 898 tags=37%,  | 6817/5702GO_BP  | SULT1A1/PDXP/SULT1A2/FAH/MAOA/ALDH1B1/A  |
| 4927 tags=50%, | 5347/22974GO_BP | PLK1/TPX2/TACC3/PSRC1/NUP62/CHMP4B/CHMP  |
| 4732 tags=33%, | 5047/2910GO_BP  | PAEP/PYCARD/CYBA/FCER1G/LGALS9/MAPK13/T  |
| 2068 tags=57%, | 54997/5117GO_BP | TESC/LEF1/EVI2B/HCLS1                    |
| 1228 tags=36%, | 83733/101GO_BP  | SLC25A18/SLC25A13/SLC1A1/SLC25A30/SLC13  |
| 767 tags=39%,  | 116255/28GO_BP  | MOGAT1/GOT1/TKFC/DGAT2/SORD/PCK2/ANGPTL  |
| 838 tags=26%,  | 55366/646GO_BP  | LGR4/SHH/SRD5A1/TBX3/SRD5A2/AR           |
| 440 tags=48%,  | 3249/2244/GO_BP | HPN/FGB/FGG/CLEC3B/FGA/F11/SERPINF2/APO  |
| 910 tags=43%,  | 154791/254GO_BP | FMC1/ETFBKMT/ACACB/PDE3B/SORL1/PLIN5/AP  |
| 6431 tags=60%, | 5984/5424/GO_BP | RFC4/POLD1/POLR2G/PCNA/RFC2/POLR2H/LIG1  |
| 5207 tags=35%, | 4318/10551GO_BP | MMP9/AGR2/CYBA/AFP/SOX9/NCF2/COL1A1/ARP  |
| 5765 tags=61%, | 3958/5740GO_BP  | LGALS3/S100A14/TGFB1/CCL5/CREB3/SERPINE  |
| 6479 tags=39%, | 6696/7345/GO_BP | SPP1/UCHL1/S100A6/RAP1GAP/LIMK1/DBN1/PO  |
| 923 tags=26%,  | 1535/990/GO_BP  | CYBA/CDC6/SRC/AGTRAP/PRKCD/HSF1          |

|                                |                                         |
|--------------------------------|-----------------------------------------|
| 5109 tags=28%, 6690/891/9GO_BP | SPINK1/CCNB1/PTTG1/PAFAH1B3/PAEP/GTSF1/ |
| 3776 tags=34%, 6690/4318/GO_BP | SPINK1/MMP9/SFN/SPINT1/S100A9/EGLN3/BIR |
| 2256 tags=24%, 9319/699/7GO_BP | TRIP13/BUB1/BUB1B/CCNE1/P3H4/RAD51/NCAP |
| 1642 tags=51%, 5194/7314/GO_BP | PEX13/UBB/PEX12/ACOT4/PEX1/NOS2/PEX19/D |
| 984 tags=40%, 8659/2729/GO_BP  | ALDH4A1/GCLC/AGMAT/FAH/HAL/ASL/GOT1/MTH |
| 1214 tags=36%, 403313/79CGO_BP | PLPP6/ELOVL6/NPC1L1/NFYB/ERLIN1/CYP51A1 |
| 1057 tags=30%, 90102/325/GO_BP | PHLDB2/APCS/PROS1/APOE/SERPING1/VTN/FGB |
| 1642 tags=51%, 5194/7314/GO_BP | PEX13/UBB/PEX12/ACOT4/PEX1/NOS2/PEX19/D |
| 1642 tags=51%, 5194/7314/GO_BP | PEX13/UBB/PEX12/ACOT4/PEX1/NOS2/PEX19/D |
| 6041 tags=46%, 6696/5909/GO_BP | SPP1/RAP1GAP/PFN2/ITM2C/ITGA3/SEMA6A/AR |
| 4827 tags=46%, 6364/3383/GO_BP | CCL20/ICAM1/LGALS9/GAPDH/CD44/PTAFR/PRK |
| 6027 tags=43%, 2207/3965/GO_BP | FCER1G/LGALS9/PFN2/MICAL1/NCS1/RAC2/SYT |
| 692 tags=42%, 51170/348/GO_BP  | HSD17B11/APOE/SULT1E1/SRD5A1/CYP27A1/CY |
| 839 tags=31%, 94081/1058GO_BP  | SFXN1/MTHFS/SHMT1/ALDH1L1/MTHFD1/MAT1A/ |
| 1121 tags=50%, 23576/4848GO_BP | DDAH1/NOS2/ALDH4A1/FAH/GOT1/GLUL/GLUD1/ |
| 764 tags=46%, 5465/1374/GO_BP  | PPARA/CPT1A/APOC2/IRS1/IRS2/PLIN5/FABP1 |
| 1117 tags=33%, 241/240 GO_BP   | ALOX5AP/ALOX5                           |
| 1117 tags=33%, 241/240 GO_BP   | ALOX5AP/ALOX5                           |
| 5644 tags=45%, 2539/2056/GO_BP | G6PD/EPO/SPI1/PRMT1/HMGB2/JAK3/HMOX1/PR |
| 6349 tags=67%, 6809/6616/GO_BP | STX3/SNAP25/CPLX2/PLEK/YKT6/RAB15/STXBP |
| 3106 tags=70%, 5580/4869/GO_BP | PRKCD/NPM1/PCNA/DDX11/RPS3/DFFA/GZMA    |
| 3893 tags=35%, 6241/302/1GO_BP | RRM2/ANXA2/COL1A1/ITPR3/COL1A2/SQSTM1/B |
| 182 tags=33%, 5347/891/9GO_BP  | PLK1/CCNB1/CCNB2/CDK1                   |
| 1871 tags=35%, 5570/9212/GO_BP | PKIB/AURKB/NEK2/NABP2/MAPK3/PNKP        |
| 3655 tags=47%, 578/100/97GO_BP | BAK1/ADA/CD74/PKN1/BAX/MIF/HIF1A/SH2B2/ |
| 4663 tags=53%, 2810/1869/GO_BP | SFN/E2F1/YWHAZ/BAX/BMF/BID/YWHAH/BBC3/P |
| 933 tags=44%, 721/733/11GO_BP  | C4B/C8G/CLU/C1R/C2/PROS1/C5/SERPING1/C1 |
| 878 tags=35%, 5164/15009GO_BP  | PDK2/SIK1/SIRT1/C1QTNF3/PGM1/SLC37A4/SL |
| 1331 tags=35%, 403313/79CGO_BP | PLPP6/ELOVL6/NPC1L1/NFYB/ERLIN1/CYP51A1 |
| 1270 tags=56%, 721/733/11GO_BP | C4B/C8G/CLU/C1RL/APCS/RGCC/C1R/C2/PROS1 |
| 1040 tags=18%, 51170/223CGO_BP | HSD17B11/FDX1/CYP11A1/CYP17A1/HSD17B2/P |
| 1642 tags=50%, 5194/7314/GO_BP | PEX13/UBB/PEX12/ACOT4/PEX1/NOS2/PEX19/D |
| 1331 tags=35%, 403313/79CGO_BP | PLPP6/ELOVL6/NPC1L1/NFYB/ERLIN1/CYP51A1 |
| 3964 tags=38%, 54209/291CGO_BP | TREM2/PYCARD/FCER1G/LGALS9/SYK/SASH3/CD |
| 2875 tags=29%, 9212/4192/GO_BP | AURKB/MDK/CDC6/VEGFB/CDC25B/KIF23/ECT2/ |
| 7545 tags=67%, 5698/10218GO_BP | PSMB9/PSMD14/TCF3/PSMD2/PSMB2/PSME3/CBF |
| 5318 tags=33%, 6696/7345/GO_BP | SPP1/UCHL1/S100A6/RAP1GAP/LIMK1/MDK/DBN |
| 8327 tags=61%, 6659/3976/GO_BP | SOX4/LIF/LOXL4/P3H4/TGFB1/SPI1/PHF19/NU |
| 5034 tags=38%, 4318/4323/GO_BP | MMP9/MMP14/TGFB1/DKK1/ITGB2/ITGAV/LAMB1 |
| 4621 tags=46%, 27242/3968GO_BP | TNFRSF21/LGALS9/FOXJ1/TYROBP/TGFB1/GPNM |
| 4621 tags=46%, 27242/3968GO_BP | TNFRSF21/LGALS9/FOXJ1/TYROBP/TGFB1/GPNM |
| 6528 tags=52%, 1869/55544GO_BP | E2F1/RBM38/IGF2BP1/PKP3/YBX3/MAPKAPK2/D |
| 6487 tags=47%, 1401/5047/GO_BP | CRP/PAEP/PYCARD/MDK/TNFRSF21/MMP12/POST |
| 7198 tags=53%, 29108/4321GO_BP | PYCARD/MMP12/FLNA/BIRC3/UNC13D/EXOSC4/M |
| 6055 tags=49%, 2810/1869/GO_BP | SFN/E2F1/BAK1/TSP0/RAC2/YWHAZ/HK2/SFXN3 |
| 7545 tags=56%, 6659/7153/GO_BP | SOX4/TOP2A/ANLN/TGFB1/SPI1/BATF/PLEK/CS |
| 2230 tags=33%, 6510/81539GO_BP | SLC1A5/SLC38A1/RGS2/SLC7A7/SLC7A1/SLC7A |
| 6041 tags=43%, 6696/81618GO_BP | SPP1/ITM2C/SEMA6A/ARHGAP4/LGALS1/DKK1/P |
| 4415 tags=47%, 6696/6714/GO_BP | SPP1/SRC/RAC2/NCDN/ACP5/SYK/CSF1R/TNFRS |
| 4909 tags=41%, 29108/2308GO_BP | PYCARD/FOXJ1/NFKBIE/TRAIP/TONSL/HAVCR2/ |
| 764 tags=26%, 10580/9858GO_BP  | SORBS1/EPM2AIP1/SIRT1/IGF1/PPARA/GPER1/ |

|                                |                                         |
|--------------------------------|-----------------------------------------|
| 6169 tags=50%, 56667/103GO_BP  | MUC13/B3GNT3/GCNT3/ST6GALNAC4/MUC1/CHST |
| 5482 tags=60%, 6280/8440/GO_BP | S100A9/NCK2/S100A8/DDIT3/BAX/NUPR1/BMF/ |
| 5045 tags=43%, 10331/5051GO_BP | B3GNT3/CHST11/TGFB1/GPC4/GPC3/AGRN/SDC3 |
| 831 tags=42%, 55258/435/GO_BP  | THNSL2/ASL/GOT1/CBS/ASPA/GLUL/GLUD1/ASP |
| 1301 tags=32%, 154791/15GO_BP  | FMC1/SIK1/SIRT1/NR1H4/ACADVL/ERLIN1/ORM |
| 1063 tags=42%, 4041/23411GO_BP | LRP5/SIRT1/NR1H4/CETP/ACSM1/LDLR/HNF4A/ |
| 782 tags=29%, 5627/948GO_BP    | PROS1/CD36/APOE/SERPING1/VTN/FGB/FGG/PR |
| 767 tags=62%, 2805/2752/GO_BP  | GOT1/GLUL/GLUD1/GOT2/ADHFE1             |
| 1266 tags=64%, 1215/1511/GO_BP | CMA1/CTSG/ACE2/CES1/ENPEP/MME/REN       |
| 1266 tags=64%, 1215/1511/GO_BP | CMA1/CTSG/ACE2/CES1/ENPEP/MME/REN       |
| 1295 tags=64%, 6817/6799/GO_BP | SULT1A1/SULT1A2/ALDH1B1/SULT1E1/SULT1B1 |
| 673 tags=55%, 3283/3284/GO_BP  | HSD3B1/HSD3B2/CYP17A1/SRD5A1/SRD5A2/HSD |
| 425 tags=45%, 4548/2374GO_BP   | MTR/BHMT2/ADI1/MTHFD1/BHMT              |
| 420 tags=45%, 346/4547GO_BP    | APOC4/MTTP/APOB/APOC1/APOC3             |
| 761 tags=45%, 875/7263/GO_BP   | CBS/TST/CTH/CPS1/BHMT                   |
| 3063 tags=43%, 54209/4321GO_BP | TREM2/MMP12/IKBKE/CSF1/RIPK2/CD74/CASP4 |
| 1226 tags=30%, 9446/5702GO_BP  | GSTO1/PDXP/PCCA/MCCC2/PCCB/GCLC/PNPO/BT |
| 1275 tags=36%, 23411/298GO_BP  | SIRT1/NPC1L1/CLU/ABCA5/LRP6/CETP/LDLR/S |
| 940 tags=38%, 23417/546GO_BP   | MLYCD/PPARA/CPT1A/APOC2/IRS1/AVPR1A/IRS |
| 782 tags=28%, 5627/948GO_BP    | PROS1/CD36/APOE/SERPING1/VTN/FGB/FGG/PR |
| 3964 tags=33%, 8877/5420GO_BP  | SPHK1/TREM2/CTSC/TYROBP/ITGAM/HAVCR2/IT |
| 895 tags=67%, 185/348/34GO_BP  | AGTR1/APOE/APOC1/APOA2/APOA1/APOA5      |
| 2496 tags=50%, 5909/5176GO_BP  | RAP1GAP/STK26/FXYD5/EZR/FSCN1/SLC9A3R1/ |
| 692 tags=67%, 348/344/34GO_BP  | APOE/APOC2/APOC4/APOB/APOC1/APOC3       |
| 446 tags=67%, 57817/6424GO_BP  | HAMP/ABCG8/ABCG5/APOA2/APOA1/APOA5      |
| 7642 tags=82%, 6659/5984/GO_BP | SOX4/RFC4/DTL/POLD1/PCNA/RFC2/PNKP/PARP |
| 1464 tags=32%, 8864/1058GO_BP  | PER2/SORBS1/EPM2AIP1/ADGRF5/IGF1/PID1/P |
| 1560 tags=50%, 196743/58GO_BP  | PAOX/ABCD3/PEX13/UBB/PEX12/ACOT4/PEX1/N |
| 782 tags=29%, 5627/948GO_BP    | PROS1/CD36/APOE/SERPING1/VTN/FGB/FGG/PR |
| 1326 tags=42%, 55902/6817GO_BP | ACSS2/SULT1A1/IGF1/ADH5/SULT1A2/RETSAT/ |
| 1063 tags=42%, 4041/23411GO_BP | LRP5/SIRT1/NR1H4/CETP/ACSM1/LDLR/HNF4A/ |
| 1379 tags=26%, 10580/221GO_BP  | SORBS1/ADGRF5/NR1H4/HTR2B/LDLR/ABHD6/AP |
| 5356 tags=37%, 100133941/GO_BP | CD24/S100A9/CCL20/CRP/CXCL1/HMGA1/PTGES |
| 6479 tags=38%, 6696/7345/GO_BP | SPP1/UCHL1/S100A6/RAP1GAP/LIMK1/DBN1/PO |
| 5356 tags=37%, 100133941/GO_BP | CD24/S100A9/CCL20/CRP/CXCL1/HMGA1/PTGES |
| 6217 tags=51%, 2810/1869/GO_BP | SFN/E2F1/MMP12/KPNA2/TSPO/RAC2/ECT2/TGF |
| 3692 tags=38%, 5361/7040/GO_BP | PLXNA1/TGFB1/CLCN2/LAMA5/EDA/FGFR1/TGM2 |
| 3842 tags=49%, 116028/58GO_BP  | RMI2/RAD51/RAD51AP1/CHEK1/SIRT6/MAD2L2/ |
| 3930 tags=33%, 10551/419GO_BP  | AGR2/MDK/MMP12/COL1A1/POSTN/TYRO3/ITGB4 |
| 3631 tags=56%, 9319/3976/GO_BP | TRIP13/LIF/TTK/FBX05/RAD1               |
| 4643 tags=39%, 54209/291GO_BP  | TREM2/PYCARD/CXCL6/POSTN/LGALS9/RIPK2/H |
| 1060 tags=29%, 65018/135/GO_BP | PINK1/ADORA2A/OXT/KCNB1/ACE2/AVPR1A/KMO |
| 3774 tags=34%, 4192/2724GO_BP  | MDK/TNFRSF21/MMP12/COL1A1/POSTN/LGALS9/ |
| 1289 tags=34%, 5164/23411GO_BP | PDK2/SIRT1/ACADVL/ERLIN1/LONP2/MLYCD/ET |
| 761 tags=60%, 875/6470/GO_BP   | CBS/SHMT1/SDS                           |
| 761 tags=80%, 4357/875/GO_BP   | MPST/CBS/CTH/CYP1A2                     |
| 1063 tags=80%, 1071/948/GO_BP  | CETP/CD36/MTTP/APOH                     |
| 1063 tags=80%, 1071/948/GO_BP  | CETP/CD36/MTTP/APOH                     |
| 1281 tags=60%, 2022/2852/GO_BP | ENG/GPER1/CTH                           |
| 7500 tags=71%, 6809/6616/GO_BP | STX3/SNAP25/CPLX2/PLEK/YKT6/RAB15/STXBP |
| 3835 tags=36%, 4192/3383/GO_BP | MDK/ICAM1/PODXL2/ITGB2/PTAFR/PLCB1/SELP |

|                                |                                          |
|--------------------------------|------------------------------------------|
| 3268 tags=37%, 10551/542CGO_BP | AGR2/TREM2/ITGA3/ARHGEF16/LGALS3/STX3/S  |
| 5216 tags=44%, 9168/822/EGO_BP | TMSB10/CAPG/PFN2/NEK2/STMN1/CCNF/CORO1A  |
| 5226 tags=50%, 4321/8767/GO_BP | MMP12/RIPK2/IRF3/STAT1/IRF7/HSPD1/MAVS/  |
| 4243 tags=59%, 9181/2592EGO_BP | ARHGEF2/ASPM/FZD7/NUMBL/LEF1/FGFR1/LBH/  |
| 4326 tags=45%, 6662/7040/GO_BP | SOX9/TGFB1/MAGED1/HNF1B/SIX2/TACSTD2/PA  |
| 1226 tags=58%, 9446/2949/GO_BP | GSTO1/GSTM5/ACAA1/ACSL1/CYP1A1/PON3/GST  |
| 1196 tags=47%, 29881/3949GO_BP | NPC1L1/LDLR/CD36/ABCG8/ABCG5/APOA2/APOA  |
| 4283 tags=48%, 3976/1435/GO_BP | LIF/CSF1/TGFB1/C1QC/IL34/HCLS1/FADD/PTP  |
| 3546 tags=86%, 7534/9368/GO_BP | YWHAZ/SLC9A3R1/CDC42/STK25/COPG1/PDCD10  |
| 3118 tags=71%, 29089/2739GO_BP | UBE2T/UBE2S/BRCA1/BARD1/RNF4             |
| 984 tags=44%, 2729/875/7GO_BP  | GCLC/CBS/TST/CSAD/CTH/CD01/AGXT          |
| 634 tags=50%, 5447/4405CGO_BP  | POR/PLIN5/ANGPTL4/APOC1/APOA2/ANGPTL3/A  |
| 1796 tags=50%, 3643/1058CGO_BP | INSR/SORBS1/EPM2AIP1/IGF1/IRS1/IRS2/GCK  |
| 713 tags=38%, 6006/5145EGO_BP  | RHCE/RHCG/SLC25A20/RHBG/SLC22A1/SLC25A4  |
| 917 tags=70%, 125061/169GO_BP  | AFMID/IDO2/AADAT/ACMSD/TDO2/KMO/HAAO     |
| 692 tags=70%, 348/344/4EGO_BP  | APOE/APOC2/MTTP/APOB/APOA2/APOA1/APOC3   |
| 917 tags=70%, 125061/169GO_BP  | AFMID/IDO2/AADAT/ACMSD/TDO2/KMO/HAAO     |
| 917 tags=70%, 125061/169GO_BP  | AFMID/IDO2/AADAT/ACMSD/TDO2/KMO/HAAO     |
| 1197 tags=60%, 37/254013/GO_BP | ACADVL/ETFBKMT/ACACB/DGAT2/PLIN5/ACADL   |
| 761 tags=40%, 875/51380/GO_BP  | CBS/CSAD/CD01/AGXT                       |
| 905 tags=34%, 26291/9971GO_BP  | FGF21/NR1H4/ABCA5/CETP/LDLR/AGTR1/CD36/  |
| 838 tags=25%, 6469/5465/GO_BP  | SHH/PPARA/APOC2/IRS2/APOC1/ABCG8/ABCG5/  |
| 6206 tags=80%, 54209/291CGO_BP | TREM2/PYCARD/CD74/CD68/SLC11A1/WAS/HLA-D |
| 3988 tags=39%, 54209/6659GO_BP | TREM2/SOX4/E2F1/TSP0/ETV5/CSF1/CSF1R/AR  |
| 1196 tags=53%, 29881/3949GO_BP | NPC1L1/LDLR/CD36/ABCG8/ABCG5/APOA2/APOA  |
| 4258 tags=61%, 23616/2309GO_BP | SH3BP1/FOXJ1/SCRIB/FSCN1/MSN/PTK7/SLC9A  |
| 940 tags=60%, 8013/23417GO_BP  | NR4A3/MLYCD/PPARA/CPT1A/IRS1/IRS2/PLIN5  |
| 5960 tags=49%, 8877/302/1GO_BP | SPHK1/ANXA2/CORO1A/STX3/SNAP25/CPLX2/TA  |
| 2910 tags=33%, 4318/4323/GO_BP | MMP9/MMP14/DKK1/ITGB2/ITGAV/LAMB1/HNF1B  |
| 3668 tags=62%, 54751/6714GO_BP | FBLIM1/SRC/PLEK/CXCL13/KIF14/CDH17/PIEZ  |
| 3852 tags=69%, 3561/3601/GO_BP | IL2RG/IL15RA/PLCB1/JAK3/SHC1/IL15/IL2RB  |
| 3852 tags=69%, 3561/3601/GO_BP | IL2RG/IL15RA/PLCB1/JAK3/SHC1/IL15/IL2RB  |
| 6418 tags=47%, 6280/7345/GO_BP | S100A9/UCHL1/TREM2/HSPB8/PYCARD/ITGB4/S  |
| 5356 tags=36%, 100133941/GO_BP | CD24/S100A9/CCL20/CRP/CXCL1/HMGA1/PTGES  |
| 6686 tags=51%, 8877/440/EGO_BP | SPHK1/ASNS/RGS2/SOX4/ELOVL7/B4GALNT1/RP  |
| 6418 tags=47%, 6280/7345/GO_BP | S100A9/UCHL1/TREM2/HSPB8/PYCARD/ITGB4/S  |
| 1471 tags=13%, 6696/7070 GO_BP | SPP1/THY1                                |
| 6652 tags=55%, 100133941/GO_BP | CD24/SRC/UNC119/NCK2/ADORA1/PRNP/MVP/DL  |
| 6686 tags=53%, 1401/9245/GO_BP | CRP/GCNT3/PYCARD/TNFRSF21/CTSC/FCER1G/I  |
| 5566 tags=49%, 2810/55359GO_BP | SFN/LAPTM4B/E2F1/BAK1/YWHAZ/HK2/BAX/SLC  |
| 6122 tags=53%, 2207/6809/GO_BP | FCER1G/STX3/SNAP25/CPLX2/PLEK/SYK/YKT6/  |
| 2861 tags=56%, 113130/641GO_BP | CDCA5/NCAPG/NUSAP1/NCAPD2/NCAPH/SMC4/AK  |
| 4830 tags=51%, 5984/51514GO_BP | RFC4/DTL/POLD1/MAD2L2/ISG15/PCNA/NPLOC4  |
| 6180 tags=76%, 8767/79679GO_BP | RIPK2/VTCN1/TRAF2/CD86/CD3E/SASH3/CD83/  |
| 3798 tags=50%, 23636/5901GO_BP | NUP62/RAN/NUP210/NUP93/NUP205/NUP37/NDC  |
| 2013 tags=60%, 1896/3065/GO_BP | EDA/HDAC1/HDAC2                          |
| 1800 tags=28%, 5547/1215/GO_BP | PRCP/CMA1/AVPR2/GAS6/DDAH1/P2RX2/SUCNR1  |
| 1379 tags=26%, 10580/9859GO_BP | SORBS1/EPM2AIP1/PDK2/SIK1/SIRT1/C1QTNF3  |
| 1130 tags=21%, 55856/5099GO_BP | ACOT13/PCBD1/ACTN2/TRPM8/ALDH9A1/ACACB/  |
| 1279 tags=24%, 3248/23411GO_BP | HPGD/SIRT1/ELOVL6/MGST2/HMGCL/BDH2/CBR4  |
| 2496 tags=50%, 5909/51769GO_BP | RAP1GAP/STK26/FXYD5/USH1C/TWF2/EZR/FSCN  |



|                |                 |                                          |
|----------------|-----------------|------------------------------------------|
| 4326 tags=44%, | 6662/7040/GO_BP | SOX9/TGFB1/MAGED1/HNF1B/BASP1/SIX2/TACS  |
| 4786 tags=44%, | 100133941/GO_BP | CD24/SRC/LGALS1/CD86/VAV1/EFNB1/CD3E/PA  |
| 3315 tags=31%, | 4318/10013GO_BP | MMP9/CD24/SOX9/LIF/TGFB1/MAGED1/HNF1B/P  |
| 7545 tags=63%, | 2207/7462/GO_BP | FCER1G/LAT2/SYK/PSMB9/PSMD14/VAV1/PSMD2  |
| 1257 tags=57%, | 54209/1435GO_BP | TREM2/CSF1/CSF1R/IL34                    |
| 1257 tags=57%, | 54209/1435GO_BP | TREM2/CSF1/CSF1R/IL34                    |
| 7076 tags=64%, | 29108/1029GO_BP | PYCARD/TRAIP/RIPK2/RELB/HMGB2/SIRPA/IRF  |
| 878 tags=30%,  | 5236/2542/GO_BP | PGM1/SLC37A4/SLC25A13/GOT1/PPARA/PC/KAT  |
| 782 tags=25%,  | 90102/325/GO_BP | PHLDB2/APCS/PROS1/APOE/SERPING1/VTN/FGB  |
| 6229 tags=37%, | 6696/7345/GO_BP | SPP1/UCHL1/S100A6/RAP1GAP/LIMK1/TNFRSF2  |
| 4909 tags=34%, | 8877/6280/GO_BP | SPHK1/S100A9/PYCARD/ICAM1/LGALS9/FOXJ1/I |
| 6856 tags=56%, | 3159/8318/GO_BP | HMGA1/CDC45/SPI1/PHF19/EZH2/DNMT1/TRIM2  |
| 6074 tags=44%, | 5347/6662/GO_BP | PLK1/SOX9/MMP12/KPNA2/CDK1/COL1A1/SRC/L  |
| 4824 tags=36%, | 100133941/GO_BP | CD24/DUSP9/CDK1/SRC/TGFB1/IQGAP3/DKK1/R  |
| 6566 tags=43%, | 6696/2539/GO_BP | SPP1/G6PD/LIMK1/RGS2/SOX9/DBN1/POSTN/RE  |
| 980 tags=38%,  | 721/733/11GO_BP | C4B/C8G/CLU/APCS/CREB3L3/C1R/C2/PROS1/E  |
| 1344 tags=38%, | 79944/2271GO_BP | L2HGDH/FH/NR1H4/ALDH4A1/GCLC/HAL/GOT1/A  |
| 1478 tags=23%, | 5243/8864/GO_BP | ABCB1/PER2/ADORA2A/PDZK1/TNFSF11/OXT/CA  |
| 1270 tags=57%, | 721/733/11GO_BP | C4B/C8G/CLU/F8/C1RL/APCS/RGCC/C1R/C2/PR  |
| 6222 tags=47%, | 8877/54209GO_BP | SPHK1/TREM2/LGALS9/PTP4A3/HAVCR2/IRAK1/  |
| 4936 tags=46%, | 5888/4796/GO_BP | RAD51/TONSL/POLD1/ALYREF/EME1/PCNA/DDX1  |
| 4263 tags=56%, | 5347/891/9GO_BP | PLK1/CCNB1/CCNB2/CDK1/AKAP8L/CTDNEP1/VR  |
| 4263 tags=56%, | 5347/891/9GO_BP | PLK1/CCNB1/CCNB2/CDK1/AKAP8L/CTDNEP1/VR  |
| 5482 tags=69%, | 3984/4085/GO_BP | LIMK1/MAD2L1/MAD2L2/FBXO5/RPL23/ABL1/RP  |
| 5774 tags=56%, | 8877/302/1GO_BP | SPHK1/ANXA2/CORO1A/CPLX2/ANKRD27/VPS18/  |
| 5632 tags=57%, | 6352/81559GO_BP | CCL5/TRIM11/POLR2G/SMARCA4/HDAC1/LEF1/N  |
| 3510 tags=56%, | 2302/100/5GO_BP | FOXJ1/ADA/PKN1/TNFSF13B/TNFAIP3          |
| 3520 tags=67%, | 4751/3832/GO_BP | NEK2/KIF11/CHEK1/CEP85/RANBP1/NSFL1C     |
| 6055 tags=50%, | 4318/2810/GO_BP | MMP9/SFN/TREM2/PYCARD/E2F1/BAK1/PLAUR/R  |
| 717 tags=35%,  | 1562/348/3GO_BP | CYP2C18/APOE/APOC2/CYP26A1/ALDH1A1/RARR  |
| 1464 tags=20%, | 8864/135/5GO_BP | PER2/ADORA2A/SLC38A2/SLC25A18/SLC26A1/A  |
| 1060 tags=27%, | 5020/28625GO_BP | OXT/LCN12/CPT2/ABCC2/PRKAG2/CD36/PPARA/  |
| 1275 tags=32%, | 23411/2988GO_BP | SIRT1/NPC1L1/CLU/ABCA5/LRP6/CETP/LDLR/S  |
| 909 tags=20%,  | 5836/5236/GO_BP | PYGL/PGM1/PRKAG2/AGL/ENPP1/STBD1/UGP2/I  |
| 878 tags=29%,  | 5236/2542/GO_BP | PGM1/SLC37A4/SLC25A13/GOT1/PPARA/PC/KAT  |
| 1060 tags=24%, | 5020/9693/GO_BP | OXT/RAPGEF2/AQP8/FDX1/TEK/PER1/SRD5A1/A  |
| 638 tags=25%,  | 23410/4035GO_BP | SIRT3/LRP1/EGFR/TNFSF11/NR1H4/RASL10B/N  |
| 1330 tags=38%, | 4321/8324/GO_BP | MMP12/FZD7/JAML                          |
| 6222 tags=46%, | 8877/54209GO_BP | SPHK1/TREM2/LGALS9/PTP4A3/HAVCR2/IRAK1/  |
| 4863 tags=52%, | 2302/7305/GO_BP | FOXJ1/TYROBP/CD74/PTAFR/SYK/CARD9/IL1B/  |
| 3562 tags=40%, | 10551/5420GO_BP | AGR2/TREM2/ITGA3/ARHGEF16/LGALS3/STX3/S  |
| 1115 tags=57%, | 23464/5525GO_BP | GCAT/THNSL2/RIDA/SDS                     |
| 340 tags=71%,  | 6777/51380GO_BP | STAT5B/CSAD/BAAT/GHR/CD01                |
| 340 tags=71%,  | 6777/51380GO_BP | STAT5B/CSAD/BAAT/GHR/CD01                |
| 234 tags=71%,  | 64241/6424GO_BP | ABCG8/ABCG5/APOA2/APOA1/APOA5            |
| 692 tags=57%,  | 19/348/335GO_BP | ABCA1/APOE/APOA1/APOC3                   |
| 1397 tags=71%, | 9481/23411GO_BP | SLC25A27/SIRT1/NR1H4/C1QTNF3/DGAT2       |
| 509 tags=57%,  | 51166/2806GO_BP | AADAT/GOT2/KMO/ALDH8A1                   |
| 234 tags=71%,  | 64241/6424GO_BP | ABCG8/ABCG5/APOA2/APOA1/APOA5            |
| 3887 tags=41%, | 4192/10631GO_BP | MDK/POSTN/TYRO3/SRC/MELTF/FBLN1/RCC2/FL  |
| 5291 tags=41%, | 2539/5997/GO_BP | G6PD/RGS2/MMP14/TGFB1/DKK1/GDF15/RBM38/I |

|                                |                                          |
|--------------------------------|------------------------------------------|
| 6494 tags=46%, 2810/1401/GO_BP | SFN/CRP/PAEP/TREM2/PYCARD/SOX4/MDK/TNFR  |
| 6418 tags=49%, 7345/5420&GO_BP | UCHL1/TREM2/HSPB8/PYCARD/TSP0/ATP13A2/T  |
| 566 tags=43%, 54209/143&GO_BP  | TREM2/CSF1/P2RX4                         |
| 566 tags=43%, 54209/143&GO_BP  | TREM2/CSF1/P2RX4                         |
| 9155 tags=83%, 54512/790&GO_BP | EXOSC4/NABP2/INTS8/DKC1/TAF6/POLR2G/POL  |
| 3928 tags=38%, 8877/2717/GO_BP | SPHK1/GLA/B4GALNT1/GAL3ST1/PRKCD/ELOVL1  |
| 5704 tags=41%, 54997/542&GO_BP | TESC/TREM2/LIF/CSF1/TYROBP/TGFB1/CD74/P  |
| 3626 tags=45%, 7203/5124&GO_BP | CCT3/PDZD11/NUP93/NUP205/NDC1/GSDMD/NUP  |
| 7150 tags=62%, 4192/3965/GO_BP | MDK/LGALS9/TGFB1/RIPK2/ADA/CD74/SYK/IL1  |
| 6405 tags=52%, 7345/2635&GO_BP | UCHL1/HSPB8/ATP13A2/GAPDH/RIPK2/QSOX1/A  |
| 7226 tags=48%, 6696/3984/GO_BP | SPP1/LIMK1/DBN1/PLXNA1/SEMA6A/ARHGAP4/T  |
| 4265 tags=39%, 27242/107&GO_BP | TNFRSF21/CTSC/MTMR2/TYMP/ITGAX/S100B/MY  |
| 3727 tags=44%, 4192/3576/GO_BP | MDK/CXCL8/RAC2/CSF1/S100A14/CD74/CCL5/M  |
| 3491 tags=37%, 54209/105&GO_BP | TREM2/UBD/LGALS9/TGFB1/SPI1/BATF/RELB/T  |
| 5928 tags=57%, 6714/1601/GO_BP | SRC/DAB2/CORO1A/MTMR2/EZR/MSN/MAPK3/MAP  |
| 6133 tags=51%, 10551/440/GO_BP | AGR2/ASNS/HSPB8/CXCL8/KDEL3/BAK1/STC2/A  |
| 3590 tags=35%, 9212/1869/GO_BP | AURKB/E2F1/NEK2/STMN1/DAB2/AURKA/DKK1/P  |
| 2482 tags=50%, 891/81620/GO_BP | CCNB1/CDT1/NDC80/MAD2L1/LCMT1/XRCC3/DYN  |
| 2482 tags=50%, 891/81620/GO_BP | CCNB1/CDT1/NDC80/MAD2L1/LCMT1/XRCC3/DYN  |
| 2482 tags=50%, 891/81620/GO_BP | CCNB1/CDT1/NDC80/MAD2L1/LCMT1/XRCC3/DYN  |
| 548 tags=26%, 4192/3383/GO_BP  | MDK/ICAM1/ITGB2/IRAK1/PTAFR              |
| 1188 tags=23%, 10184/232&GO_BP | LHFPL2/PLCB1/ZP3                         |
| 5023 tags=38%, 5047/2910&GO_BP | PAEP/PYCARD/MDK/MMP12/POSTN/LGALS9/SRC/A |
| 3335 tags=28%, 8612/8877/GO_BP | PLPP2/SPHK1/ELOVL7/B4GALNT1/GAL3ST1/ALDI |
| 6175 tags=61%, 3838/2363&GO_BP | KPNA2/NUP62/ALYREF/RAN/NUP210/VPS37C/NU  |
| 6175 tags=61%, 3838/2363&GO_BP | KPNA2/NUP62/ALYREF/RAN/NUP210/VPS37C/NU  |
| 3955 tags=28%, 5347/891/1GO_BP | PLK1/CCNB1/AFP/RGS2/MDK/TOP2A/TRIP13/CD  |
| 778 tags=19%, 1191/3067/GO_BP  | CLU/HDC/DDC/CD36/ALDH9A1/GCH1/RORA/ASS1  |
| 895 tags=28%, 2247/4908/GO_BP  | FGF2/NTF3/LRP1/EGFR/ANGPTL8/HTR2B/AGTR1  |
| 4950 tags=43%, 7040/9156/GO_BP | TGFB1/EXO1/CLCF1/BATF/TFRC/HMGB2/TCF3/P  |
| 4950 tags=43%, 7040/9156/GO_BP | TGFB1/EXO1/CLCF1/BATF/TFRC/HMGB2/TCF3/P  |
| 3315 tags=35%, 6696/4316/GO_BP | SPP1/MMP7/RGS2/LGALS9/ITGA3/LIF/AKR1B1/I |
| 3491 tags=56%, 27242/730&GO_BP | TNFRSF21/TYROBP/PKN1/CD300A/MNDA/CTLA4/I |
| 5327 tags=52%, 7153/302/&GO_BP | TOP2A/ANXA2/KPNA2/LGALS9/LGALS1/CD74/CHI |
| 2230 tags=33%, 5997/6536/GO_BP | RGS2/SLC6A9/SLC36A1/SLC38A5              |
| 5960 tags=51%, 123920/74&GO_BP | CMTM3/LAT2/IGLL5/SYK/BAX/CD300A/SLC39A1  |
| 1484 tags=36%, 1215/554/&GO_BP | CMA1/AVPR2/SUCNR1/ADRB1/CTSG/RASL10B/AG  |
| 991 tags=27%, 4969/23417GO_BP  | OGN/MLYCD/PCYOX1/CBS/HYAL1/NUDT7/TST/AC  |
| 5169 tags=46%, 6364/2910&GO_BP | CCL20/PYCARD/STK39/CCL5/MSN/IL27RA/ADAM  |
| 1589 tags=56%, 10331/9334GO_BP | B3GNT3/B4GALT5/B3GNT5/B3GNT9/B3GNT7      |
| 6436 tags=54%, 5570/9212/GO_BP | PKIB/AURKB/NEK2/SRC/RFC4/DSCC1/SMG5/PIF  |
| 3939 tags=28%, 1364/706/1GO_BP | CLDN4/TSP0/CLIC1/FXYD3/TTYH3/ANO9/PTAFR  |
| 3625 tags=64%, 5973/10007GO_BP | RENBP/GNPDA1/NPL/CHIT1/NAGK/GNPDA2/AMDH  |
| 2627 tags=62%, 6714/5341/GO_BP | SRC/PLEK/CXCL13/CDH17/PIEZ01             |
| 1124 tags=43%, 6608/4040/GO_BP | SMO/LRP6/HMGCS1/GRAMD1C/RORA/INSIG1/ROR  |
| 2256 tags=80%, 5347/7272/GO_BP | PLK1/TTK/NCAPH/NCAPH2                    |
| 2719 tags=80%, 5580/5111/GO_BP | PRKCD/PCNA/DDX11/RPS3                    |
| 291 tags=40%, 81620/560&GO_BP  | CDT1/MAPK13                              |
| 1048 tags=60%, 2056/9181/GO_BP | EPO/ARHGEF2/YBX3                         |
| 3246 tags=52%, 5538/2896/GO_BP | PPT1/GRN/ATP6VOD2/TCIRG1/ATP6V1H/CLN3/S  |
| 5652 tags=67%, 3838/2351&GO_BP | KPNA2/SCRIB/ZC3H12A/KPNB1/CPSF4/BAD/CAS  |

|                                |                                          |
|--------------------------------|------------------------------------------|
| 4824 tags=33%, 8877/10015GO_BP | SPHK1/CD24/CCL20/UCLH1/TREM2/PYCARD/RGS2 |
| 6100 tags=49%, 6280/56667GO_BP | S100A9/MUC13/CRP/PYCARD/CYBA/LIMK1/LY96  |
| 5239 tags=36%, 6696/1401/GO_BP | SPP1/CRP/TMSB10/CAPG/PYCARD/LIMK1/RGS2/  |
| 5886 tags=40%, 100133941/GO_BP | CD24/CTHRC1/SOX4/MDK/SOX9/COL1A1/SULF1/  |
| 4734 tags=32%, 6280/3984/GO_BP | S100A9/LIMK1/RGS2/MDK/EPO/DBN1/REG1A/PL  |
| 3335 tags=29%, 8612/8877/GO_BP | PLPP2/SPHK1/ELOVL7/B4GALNT1/GAL3ST1/ALDI |
| 5960 tags=48%, 8877/302/1GO_BP | SPHK1/ANXA2/CORO1A/STX3/SNAP25/CPLX2/TA  |
| 8126 tags=70%, 63875/6185GO_BP | MRPL17/MRPS12/MRPL47/MRPL9/MRPS23/MRPL1  |
| 2333 tags=29%, 6510/6535/GO_BP | SLC1A5/SLC6A8/SLC38A1/RGS2/SLC7A7/SLC6A  |
| 6181 tags=46%, 7040/23636GO_BP | TGFB1/NUP62/RAN/LIN28B/NUP210/CNOT11/MA  |
| 831 tags=36%, 55258/2805GO_BP  | THNSL2/GOT1/GOT2/BHMT2/ADI1/AASS/MTHFD1  |
| 857 tags=45%, 2185/1027/GO_BP  | PTK2B/CDKN1B/LIG4/ASCL1/SHH/ID2/ADCY1/I  |
| 785 tags=23%, 1583/2638/GO_BP  | CYP11A1/GC/CYP27A1/CYP1A1/CYP3A4         |
| 4900 tags=41%, 9168/822/1GO_BP | TMSB10/CAPG/CRYAB/PFN2/STMN1/CORO1A/ARH  |
| 5182 tags=40%, 8877/991/5GO_BP | SPHK1/CDC20/PLK1/UBE2S/TRIB3/MAGEC2/FAN  |
| 895 tags=55%, 185/348/34GO_BP  | AGTR1/APOE/APOC1/APOA2/APOA1/APOA5       |
| 7685 tags=62%, 54913/8270GO_BP | RPP25/LAGE3/PUSL1/TSEN54/WDR4/CSTF2/TRM  |
| 2868 tags=32%, 6001/37579GO_BP | RGS10/AGRN/PLCB1/GNA15/GNB1/GRK2         |
| 5147 tags=47%, 10551/440/GO_BP | AGR2/ASNS/CXCL8/KDELRL3/BAK1/STC2/CLGN/N |
| 3505 tags=48%, 22948/7905GO_BP | CCT5/NABP2/CCT6A/CCT3/DKC1/ACD/CCT2/CCT  |
| 4973 tags=42%, 10331/5051GO_BP | B3GNT3/CHST11/TGFB1/GPC4/GPC3/AGRN/SDC3  |
| 1589 tags=50%, 10331/9334GO_BP | B3GNT3/B4GALT5/B3GNT5/B3GNT9/B3GNT7      |
| 4367 tags=47%, 7040/4050/GO_BP | TGFB1/LTB/CD248/TNFRSF11A/IL15/FADD/TOX  |
| 895 tags=32%, 2621/56670GO_BP  | GAS6/SUCNR1/AGTR1/REN/CYP4F12/SERPINF2/  |
| 1379 tags=35%, 10580/9852GO_BP | SORBS1/EPM2AIP1/IGF1/ENPP1/IRS1/IRS2/GC  |
| 1379 tags=35%, 10580/9852GO_BP | SORBS1/EPM2AIP1/IGF1/ENPP1/IRS1/IRS2/GC  |
| 2351 tags=26%, 4605/1728/GO_BP | MYBL2/NQO1/TYROBP/ITGAM/PRNP/GRN/DDIT3/  |
| 6227 tags=42%, 6696/2539/GO_BP | SPP1/G6PD/SPHK1/SFN/S100A9/CYBA/LIMK1/R  |
| 1283 tags=33%, 7076/7040/GO_BP | TIMP1/TGFB1/HIF1A                        |
| 3131 tags=41%, 2302/7305/GO_BP | FOXJ1/TYROBP/CD74/PTAFR/SYK/CARD9/IL1B/  |
| 557 tags=67%, 1468/25351GO_BP  | SLC25A10/SLC25A30/SLC13A3/SLC13A5        |
| 557 tags=67%, 1468/25351GO_BP  | SLC25A10/SLC25A30/SLC13A3/SLC13A5        |
| 410 tags=38%, 7083/1841/GO_BP  | TK1/DTYMK/ADA                            |
| 2217 tags=50%, 891/5595/8GO_BP | CCNB1/MAPK3/RPS6KA4/IL1B                 |
| 5701 tags=55%, 29108/8161GO_BP | PYCARD/ITM2C/TNFRSF12A/TRAFF2/RBCK1/PPP2 |
| 4630 tags=32%, 8877/2810/GO_BP | SPHK1/SFN/S100A9/AGR2/CCNB1/CYBA/LIMK1/  |
| 5806 tags=51%, 3576/7153/GO_BP | CXCL8/TOP2A/APOBEC3C/TRIM6/TRIM28/CCL5/  |
| 8551 tags=74%, 63875/6185GO_BP | MRPL17/MRPS12/MRPL47/MRPL9/MRPS23/MRPL1  |
| 4097 tags=24%, 6690/226/5GO_BP | SPINK1/ALDOA/PAEP/CDK1/LHFPL2/GNPDA1/CL  |
| 6026 tags=50%, 6280/1535/GO_BP | S100A9/CYBA/LY96/IKBKE/TYRO3/S100A14/IT  |
| 5780 tags=51%, 1535/1410/GO_BP | CYBA/CRYAB/ICAM1/BAK1/ECT2/TGFB1/RAD51/  |
| 328 tags=24%, 3078/3080/GO_BP  | CFHR1/CFHR2/GPLD1/CFHR5                  |
| 182 tags=29%, 891/983 GO_BP    | CCNB1/CDK1                               |
| 934 tags=50%, 338821/657GO_BP  | SLC01B7/SLC01A2/SLC02A1/SLC22A9/SLC16A2  |
| 4418 tags=46%, 4321/2316/GO_BP | MMP12/FLNA/CD44/DDR1/CD151/RHOC/COL5A1/  |
| 4418 tags=46%, 4321/2316/GO_BP | MMP12/FLNA/CD44/DDR1/CD151/RHOC/COL5A1/  |
| 1295 tags=25%, 8877/4318/GO_BP | SPHK1/MMP9/TREM2/CTSC/IL18/GRN/NUPR1     |
| 764 tags=60%, 5465/1374/GO_BP  | PPARA/CPT1A/IRS1/IRS2/PLIN5/FABP1        |
| 778 tags=50%, 4780/948/2GO_BP  | NFE2L2/CD36/GCH1/FBLN5/RGN               |
| 1942 tags=33%, 6696/6850/GO_BP | SPP1/SYK/TFRC/ATP6AP1/TNFRSF11A/ADAM8    |
| 1942 tags=33%, 6696/6850/GO_BP | SPP1/SYK/TFRC/ATP6AP1/TNFRSF11A/ADAM8    |

|                |                 |                                          |
|----------------|-----------------|------------------------------------------|
| 763 tags=43%,  | 26291/150CGO_BP | FGF21/SIK1/SIRT1/MOGAT1/CETP/LDLR/PNPLA  |
| 1109 tags=19%, | 8864/5145EGO_BP | PER2/RHCG/ADORA2A/ADRA2B/OXT/DDC/SYT7/K  |
| 1404 tags=26%, | 5409/4929/GO_BP | PNMT/NR4A2/PMEL/EPAS1/NPR1/SULT1A1/HDC/  |
| 1196 tags=19%, | 29881/6446GO_BP | NPC1L1/SGK1/OXT/LDLR/AC01/WNK3/CD36/HAM  |
| 1277 tags=29%, | 150094/234GO_BP | SIK1/SIRT1/NR1H4/C1QTNF3/ACADVL/ERLIN1/  |
| 3246 tags=31%, | 483/64699/GO_BP | ATP1B3/TMPRSS3/ATP1A1/PPT1/MAFG/SLAMF8/  |
| 2521 tags=16%, | 3880/25984GO_BP | KRT19/KRT23/DSG2/KRT17/PI3/KRT80/PKP3/K  |
| 1933 tags=50%, | 9212/100/9GO_BP | AURKB/ADA/CD74/MIF/SLC39A10/NOC2L        |
| 5255 tags=65%, | 2207/7305/GO_BP | FCER1G/TYROBP/STX3/GPD1L/HSP90AB1/RANGR  |
| 2447 tags=35%, | 2539/5997/GO_BP | G6PD/RGS2/DKK1/FZD7/PAK1/GSK3A           |
| 3964 tags=45%, | 54209/4321GO_BP | TREM2/MMP12/IKBKE/CSF1/RIPK2/CD74/CASP4  |
| 4824 tags=42%, | 6364/29108GO_BP | CCL20/PYCARD/CYBA/LCN2/CXCL8/SOX9/EPO/I  |
| 4663 tags=54%, | 2810/1869/GO_BP | SFN/E2F1/YWHAZ/BID/YWHAH/BBC3/PMAIP1/YW  |
| 4663 tags=54%, | 2810/1869/GO_BP | SFN/E2F1/YWHAZ/BID/YWHAH/BBC3/PMAIP1/YW  |
| 895 tags=53%,  | 185/348/38GO_BP | AGTR1/APOE/ACAT1/APOC1/APOA2/LCAT/APOA1  |
| 895 tags=53%,  | 185/348/38GO_BP | AGTR1/APOE/ACAT1/APOC1/APOA2/LCAT/APOA1  |
| 895 tags=53%,  | 185/348/38GO_BP | AGTR1/APOE/ACAT1/APOC1/APOA2/LCAT/APOA1  |
| 767 tags=53%,  | 2805/2746/GO_BP | GOT1/GLUD1/GOT2/ACMSD/KMO/GLS2/HAA0/MTH  |
| 762 tags=40%,  | 3172/5629/GO_BP | HNF4A/PROX1/CYP1A1/PCK2/CPS1/PCK1        |
| 4296 tags=42%, | 7272/6790/GO_BP | TTK/AURKA/CEP131/ABHD17C/NUP62/SPAG5/MA  |
| 4830 tags=45%, | 5984/51514GO_BP | RFC4/DTL/POLD1/CDKN2D/MAD2L2/ISG15/PCNA  |
| 3359 tags=31%, | 8877/54209GO_BP | SPHK1/TREM2/BACE2/CTSC/TYROBP/ITGAM/ITG  |
| 3335 tags=29%, | 8612/8877/GO_BP | PLPP2/SPHK1/GLA/ELOVL7/B4GALNT1/GAL3ST1  |
| 1326 tags=39%, | 55902/5164GO_BP | ACSS2/PDK2/ELOVL6/ACOT13/ACSM1/ACSF2/HM  |
| 1326 tags=39%, | 55902/5164GO_BP | ACSS2/PDK2/ELOVL6/ACOT13/ACSM1/ACSF2/HM  |
| 3158 tags=43%, | 7114/1649/GO_BP | TMSB4X/DDIT3/MAD2L2/SRI/ZNF593/ANKRD33/I |
| 6055 tags=53%, | 5880/3684/GO_BP | RAC2/ITGAM/ITGB2/PRNP/HRAS/MICALL2/SAE1  |
| 1407 tags=54%, | 1956/1600/GO_BP | EGFR/DAB1/SMO/EDNRB/ASS1/OTC/CPS1        |
| 1275 tags=29%, | 23411/9971GO_BP | SIRT1/NR1H4/CETP/ABCC2/SLC12A1/GOT1/HNF  |
| 210 tags=21%,  | 135/1137/1GO_BP | ADORA2A/CHRNA4/ABAT                      |
| 7974 tags=64%, | 23636/5905GO_BP | NUP62/RANGAP1/SAE1/TRIM28/NUP210/UBE2I/I |
| 566 tags=60%,  | 54209/1435GO_BP | TREM2/CSF1/P2RX4                         |
| 3228 tags=34%, | 100/23529/GO_BP | ADA/CLCF1/CD74/CD320/TFRC/MIF/SASH3/TNF  |
| 895 tags=33%,  | 185/348/54GO_BP | AGTR1/APOE/POR/PPARGC1A/APOC1/APOA2/APO  |
| 5226 tags=46%, | 4321/8767/GO_BP | MMP12/RIPK2/HAVCR2/IRF3/STAT1/IRF7/HSPD  |
| 6337 tags=64%, | 5570/9212/GO_BP | PKIB/AURKB/NEK2/MAPK3/DKC1/ACD/CCT2/HSP  |
| 6810 tags=71%, | 4321/9641/GO_BP | MMP12/IKBKE/SCRIB/TRIM6/IRF3/HSP90AB1/I  |
| 4759 tags=63%, | 5984/2237/GO_BP | RFC4/FEN1/POLD1/POLA2/PCNA/RFC2/PRIM1/P  |
| 6512 tags=49%, | 8612/1852/GO_BP | PLPP2/DUSP9/CDKN3/DLGAP5/CDC25B/PTP4A3/I |
| 302 tags=26%,  | 1723/6470/GO_BP | DHODH/SHMT1/XDH/MTHFD1/AOX1/DPYS/ALDH6A  |
| 3876 tags=54%, | 81620/5105GO_BP | CDT1/GMNN/PYG02/DDX11/KDM1A/MED25/CTBP2  |
| 3762 tags=64%, | 6714/5157/GO_BP | SRC/PDGFR/LHIP1R/PDGFA/LOX/ABL1/PTPN12/I |
| 4179 tags=38%, | 2539/274/7GO_BP | G6PD/BIN1/CACNB3/SESTD1/CACNB1           |
| 1354 tags=60%, | 26063/1384GO_BP | DECR2/CRAT/ETFA/DECR1/PCCA/ACADVL/ABHD2  |
| 908 tags=37%,  | 54884/224/GO_BP | RETSAT/ALDH3A2/CYP2C18/APOE/APOC2/CYP26  |
| 1354 tags=61%, | 114757/801GO_BP | CYGB/NR4A3/ADIPOR2/ABCD3/PEX13/ECI1/AUH  |
| 1398 tags=57%, | 28996/404CGO_BP | HIPK2/LRP6/PROX1/RBP4                    |
| 2818 tags=60%, | 1277/1287/GO_BP | COL1A1/COL4A5/SYK/DDR1/UBASH3B/COL4A2    |
| 2674 tags=60%, | 54209/6091GO_BP | TREM2/ROB01/CCL5/HIF1A/RNF113A/PADI2     |
| 6198 tags=47%, | 6696/2539/GO_BP | SPP1/G6PD/RGS2/CRYAB/ENO1/SEMA6A/SERPIN  |
| 2857 tags=50%, | 3691/977/3GO_BP | ITGB4/CD151/LAMC1/PLEC/LAMC2/LAMB3       |

|                                |                                         |
|--------------------------------|-----------------------------------------|
| 3359 tags=50%, 54209/1075GO_BP | TREM2/CTSC/IL18/NUPR1/IL1B/CCL3         |
| 2015 tags=32%, 6510/81535GO_BP | SLC1A5/SLC38A1/RGS2/SLC7A7/SLC7A1/SLC7A |
| 6686 tags=57%, 7040/23635GO_BP | TGFB1/NUP62/NUP210/MAP2K2/POLR2G/NUP93/ |
| 6686 tags=57%, 7040/23635GO_BP | TGFB1/NUP62/NUP210/MAP2K2/POLR2G/NUP93/ |
| 2284 tags=67%, 3934/2495/GO_BP | LCN2/FTH1/SRI/FTL                       |
| 1763 tags=45%, 2861/5409/GO_BP | GPR37/PNMT/NR4A2/HDC/DDC/GCH1/DBH/PAH/D |
| 1763 tags=45%, 2861/5409/GO_BP | GPR37/PNMT/NR4A2/HDC/DDC/GCH1/DBH/PAH/D |
| 4477 tags=42%, 9168/822/5GO_BP | TMSB10/CAPG/PFN2/STMN1/PRKCD/MAPRE1/TMS |
| 1010 tags=26%, 4258/12641GO_BP | MGST2/CYP4F22/FAAH/CYP2C18/AVPR1A/ACOX1 |
| 1252 tags=23%, 286410/107GO_BP | ATP11C/SLC17A3/PCTP/CETP/LDLR/SLC37A4/A |
| 1063 tags=22%, 1071/5020/GO_BP | CETP/OXT/AGTR1/SHH/PPARA/APOE/APOC2/LIP |
| 553 tags=26%, 1562/54895GO_BP  | CYP2C18/ELOVL2/AVPR1A/ACOX1/ACAA1/HSD17 |
| 1354 tags=60%, 114757/801GO_BP | CYGB/NR4A3/ADIPOR2/ABCD3/PEX13/ECI1/AUH |
| 8642 tags=80%, 6628/1478/GO_BP | SNRBP/CSTF2/CD3EAP/POLR3K/SNRPE/POLR2H/ |
| 297 tags=40%, 1593/1576 GO_BP  | CYP27A1/CYP3A4                          |
| 297 tags=40%, 1593/1576 GO_BP  | CYP27A1/CYP3A4                          |
| 2111 tags=80%, 595/5481/1GO_BP | CCND1/PPID/EGFR/MME                     |
| 3465 tags=30%, 29108/3965GO_BP | PYCARD/LGALS9/RIPK2/HAVCR2/PRNP/HRAS/IL |
| 182 tags=40%, 891/983 GO_BP    | CCNB1/CDK1                              |
| 5886 tags=51%, 2539/5997/GO_BP | G6PD/RGS2/DKK1/EZH2/FZD7/BHLHE41/PAK1/G |
| 6334 tags=49%, 2810/54997GO_BP | SFN/TESC/UCHL1/PLK1/PYCARD/PKIB/LIMK1/R |
| 1918 tags=43%, 3606/240/1GO_BP | IL18/ALOX5/IL18BP                       |
| 1918 tags=43%, 3606/240/1GO_BP | IL18/ALOX5/IL18BP                       |
| 2206 tags=43%, 7114/1649/GO_BP | TMSB4X/DDIT3/ZNF593                     |
| 2688 tags=44%, 10537/7040GO_BP | UBD/TGFB1/SPI1/BATF/RELB/BATF2/LTBR/BAT |
| 883 tags=36%, 2166/56624GO_BP  | FAAH/ASAH2/ACOT1/PNPLA3/AIG1/ACOT2/CYP2 |
| 909 tags=18%, 5836/5236/GO_BP  | PYGL/PGM1/PRKAG2/AGL/ENPP1/STBD1/UGP2/I |
| 1379 tags=32%, 10580/9852GO_BP | SORBS1/EPM2AIP1/PDK2/SIK1/SIRT1/C1QTNF3 |
| 1039 tags=26%, 57026/1095GO_BP | PDXP/PRDX3/HBA2/CYP4F11/MTHFS/NNT/NUDT7 |
| 1179 tags=58%, 64087/8655GO_BP | MCCC2/ALDH4A1/GCAT/HDC/PCBD1/AMT/HMGCL/ |
| 5467 tags=64%, 3958/84865GO_BP | LGALS3/HAVCR2/NCK2/MSN/CD6/DOCK2/CCL19/ |
| 2910 tags=30%, 4318/4323/GO_BP | MMP9/MMP14/DKK1/ITGB2/ITGAV/LAMB1/HNF1B |
| 1295 tags=40%, 891/983/52GO_BP | CCNB1/CDK1/PGK1/NUPR1                   |
| 4153 tags=52%, 55353/5504GO_BP | LAPTM4B/VPS37C/SORT1/LEPROTL1/SNF8/CHMP |
| 5255 tags=67%, 25825/8161GO_BP | BACE2/ITM2C/JAK3/AATF/AGO2/ACOT8/HBEGF/ |
| 905 tags=32%, 3949/48/94GO_BP  | LDLR/ACO1/CD36/HAMP/FABP1/ABCG8/ABCG5/A |
| 5327 tags=47%, 3576/7153/GO_BP | CXCL8/TOP2A/APOBEC3C/TRIM6/TRIM28/CCL5/ |
| 6241 tags=59%, 54209/2207GO_BP | TREM2/FCER1G/SH3BP1/ITGAM/ITGB2/IGLL5/R |
| 1434 tags=23%, 10686/135/GO_BP | CLDN16/ADORA2A/NPR1/OXT/AQP6/AGTR1/ADRA |
| 1429 tags=37%, 4496/1956/GO_BP | MT1H/EGFR/FOS/MT1F/MT1B/GCLC/SOD1/GOT1/ |
| 854 tags=40%, 1956/2908/GO_BP  | EGFR/NR3C1/ABCC2/GJB2/FOXO1/ERRFI1/SRD5 |
| 1226 tags=25%, 9446/128/4GO_BP | GSTO1/ADH5/MGST1/PRDX3/MGST2/HBA2/SOD1/ |
| 4993 tags=41%, 4072/2192/GO_BP | EPCAM/FBLN1/TGFB1/RACGAP1/ARHGEF2/SMAR  |
| 1482 tags=50%, 1277/1513/GO_BP | COL1A1/CTSK/MMP2                        |
| 1482 tags=50%, 1277/1513/GO_BP | COL1A1/CTSK/MMP2                        |
| 2852 tags=38%, 8767/84865GO_BP | RIPK2/HAVCR2/RELB/HRAS/IL18/JAK3/SEMA4A |
| 4824 tags=32%, 8877/10015GO_BP | SPHK1/CD24/CCL20/UCHL1/TREM2/PYCARD/RGS |
| 3359 tags=32%, 8877/54205GO_BP | SPHK1/TREM2/CTSC/TYROBP/ITGAM/ITGB2/C1Q |
| 3359 tags=32%, 8877/54205GO_BP | SPHK1/TREM2/CTSC/TYROBP/ITGAM/ITGB2/C1Q |
| 4982 tags=37%, 100133941/GO_BP | CD24/CCNB1/CDC6/DUSP9/CDK1/SRC/CKS2/TGF |
| 2472 tags=29%, 4192/10631GO_BP | MDK/POSTN/PLXNA1/SRC/GSTP1/PLAU/IGFBP3/ |

|                |                 |                                         |
|----------------|-----------------|-----------------------------------------|
| 4013 tags=41%, | 578/57761/GO_BP | BAK1/TRIB3/NCK2/CASP4/CREB3L1/DDIT3/TRA |
| 4662 tags=30%, | 6280/3984/GO_BP | S100A9/LIMK1/RGS2/MDK/EPO/DBN1/REG1A/PL |
| 3919 tags=42%, | 2810/1869/GO_BP | SFN/E2F1/BAK1/YWHAZ/BAX/SLC9A1/SLC35F6/ |
| 1191 tags=50%, | 94097/6484GO_BP | SFXN5/SLC13A3/SLC13A5                   |
| 1104 tags=67%, | 10203/502CGO_BP | CALCRL/OXT/KHK/SLC6A1                   |
| 1191 tags=50%, | 94097/6484GO_BP | SFXN5/SLC13A3/SLC13A5                   |
| 888 tags=83%,  | 3034/1058EGO_BP | HAL/MTHFS/AMDHD1/FTCD/UROC1             |
| 1104 tags=67%, | 10203/502CGO_BP | CALCRL/OXT/KHK/SLC6A1                   |
| 395 tags=67%,  | 51129/341/GO_BP | ANGPTL4/APOC1/ANGPTL3/APOC3             |
| 5466 tags=43%, | 10397/3384GO_BP | NDRG1/ANO9/FCHO1/DMKN/PRKCD/BAIAP2L2/AB |
| 3465 tags=31%, | 29108/396EGO_BP | PYCARD/LGALS9/RIPK2/HAVCR2/PRNP/HRAS/IL |
| 4318 tags=42%, | 1410/578/EGO_BP | CRYAB/BAK1/SPI1/SCRIB/HNF1B/BAX/LEF1/JA |
| 5011 tags=40%, | 2810/54997GO_BP | SFN/TESC/UCHL1/PLK1/PYCARD/PKIB/RGS2/DU |
| 523 tags=50%,  | 2646/10891GO_BP | GCKR/PPARGC1A/KHK/PCK1                  |
| 207 tags=38%,  | 8993/2147/GO_BP | PGLYRP1/F2/HRG                          |
| 466 tags=62%,  | 51000/915EGO_BP | SLC35B3/SLC28A2/SLC25A42/SLC28A1/AQP9   |
| 644 tags=20%,  | 134 GO_BP       | ADORA1                                  |
| 4258 tags=35%, | 4605/1728/GO_BP | MYBL2/NQO1/TYROBP/ITGAM/DKK1/ITGB2/C1QA |
| 3578 tags=36%, | 6696/1159CGO_BP | SPP1/CTHRC1/MDK/SRC/RAC2/P3H4/TGFB1/NCD |
| 7144 tags=56%, | 4321/9641/GO_BP | MMP12/IKBKE/IRAK1/MX2/SCRIB/TRIM6/GBP2/ |
| 7144 tags=56%, | 4321/9641/GO_BP | MMP12/IKBKE/IRAK1/MX2/SCRIB/TRIM6/GBP2/ |
| 7063 tags=55%, | 4321/3838/GO_BP | MMP12/KPNA2/ECT2/TGFB1/FLNA/SNRPB/PRKCD |
| 3177 tags=43%, | 6509/2063EGO_BP | SLC1A4/SLC36A1/SLC36A4                  |
| 2144 tags=57%, | 330/83596/GO_BP | BIRC3/BCL2L12/NOL3/BIRC7                |
| 6454 tags=56%, | 9245/7040/GO_BP | GCNT3/TGFB1/EXO1/CLCF1/BATF/HLA-DQB1/TF |
| 1806 tags=16%, | 5347/9232/GO_BP | PLK1/PTTG1/TRIP13/CCNE1/P3H4/FANCD2/ESP |
| 3954 tags=38%, | 100133941/GO_BP | CD24/SRC/UNC119/ADORA1/PRNP/DLG3/CSF1R/ |
| 6181 tags=49%, | 7040/2363EGO_BP | TGFB1/NUP62/RAN/LIN28B/NUP210/MAP2K2/PO |
| 5871 tags=60%, | 112616/39EGO_BP | CMTM7/LGALS1/ADA/SLAMF8/BCL3/CDH17/GPR1 |
| 4239 tags=38%, | 5347/983/EGO_BP | PLK1/CDK1/SRC/LIF/ECT2/TGFB1/FLNA/PRKCD |
| 620 tags=33%,  | 320/18/652GO_BP | APBA1/ABAT/SLC6A1                       |
| 3876 tags=41%, | 81620/510EGO_BP | CDT1/GMNN/PYG02/DDX11/KDM1A/MED25/NFATC |
| 5879 tags=59%, | 100/12392CGO_BP | ADA/CMTM3/SLC39A10/NFAM1/LCK/RPS3/PRKD2 |
| 6431 tags=52%, | 5984/55247GO_BP | RFC4/NEIL3/POLD1/RBBP8/POLR2G/PCNA/RFC2 |
| 5644 tags=43%, | 2539/2056/GO_BP | G6PD/EPO/SPI1/PRMT1/HMGB2/JAK3/FLVCR1/H |
| 4535 tags=41%, | 7040/3161/GO_BP | TGFB1/HMMR/GPC4/GPC3/CD44/AGRN/SDC3/VCA |
| 5310 tags=57%, | 27242/2302GO_BP | TNFRSF21/FOXJ1/TYROBP/PKN1/HMGB3/CD300A |
| 3964 tags=39%, | 23643/704CGO_BP | LY96/TGFB1/RIPK2/IRAK1/PTAFR/HCK/IL18/C |
| 6276 tags=46%, | 3880/4192/GO_BP | KRT19/MDK/SOX9/POSTN/DLGAP5/PTP4A3/MMP1 |
| 4603 tags=39%, | 4192/3965/GO_BP | MDK/LGALS9/RIPK2/PRKCD/ACP5/SYK/PLCB1/L |
| 6566 tags=44%, | 3984/1627/GO_BP | LIMK1/DBN1/POSTN/REG1A/PLXNA1/SEMA6A/AR |
| 6792 tags=51%, | 891/3159/EGO_BP | CCNB1/HMGA1/CDC45/MKI67/LIF/TGFB1/SPI1/ |
| 2852 tags=30%, | 5738/9518/GO_BP | PTGFRN/GDF15/PLEKH01/CD53/FLOT1/EHD1/CX |
| 4274 tags=34%, | 6692/1159CGO_BP | SPINT1/CTHRC1/SOX4/TEAD2/SPINT2/TGFB1/F |
| 1289 tags=33%, | 5164/1500EGO_BP | PDK2/SIK1/SIRT1/C1QTNF3/PPARA/KAT2B/FOX |
| 1251 tags=50%, | 10786/566CGO_BP | SLC17A3/SLC2A9/SLC17A1/GCKR/ABCG2/G6PC  |
| 4413 tags=47%, | 3383/960/EGO_BP | ICAM1/CD44/PTAFR/PRKCD/HLA-DRB1/HLA-DQA |
| 4291 tags=35%, | 1869/11151GO_BP | E2F1/COR01A/MICALL1/ARPC3/SORT1/RAB35/E |
| 645 tags=43%,  | 338440/572GO_BP | ANO9/PTAFR/PRNP                         |
| 676 tags=31%,  | 10400/259EGO_BP | PEMT/GAMT/BHMT2/MAT1A/GNMT              |
| 5566 tags=51%, | 2810/1869/GO_BP | SFN/E2F1/BAK1/YWHAZ/HK2/BAX/SLC9A1/SLC3 |

|                                 |                                          |
|---------------------------------|------------------------------------------|
| 6258 tags=57%, 11031/8387GO_BP  | RAB31/RAB34/RAB6B/RAB32/RAB15/RAB25/RAB  |
| 2352 tags=47%, 960/972/45GO_BP  | CD44/CD74/MUC1/ZNF385A/MIF/BCL2L12/KDM1  |
| 6566 tags=52%, 6696/57556GO_BP  | SPP1/SEMA6A/ARHGAP4/PLXNA3/LINGO1/SEMA4  |
| 1511 tags=29%, 991/11313GO_BP   | CDC20/CDCA5/DSCC1/NAA10/NSMCE2/SGO1      |
| 3727 tags=43%, 54209/1075GO_BP  | TREM2/CTSC/HAVCR2/TNIP2/IL4R/LBP/CCL3/H  |
| 908 tags=37%, 54884/3157GO_BP   | RETSAT/HMGCS1/ALDH3A2/CYP2C18/APOE/APOC  |
| 525 tags=27%, 991/1627/1GO_BP   | CDC20/DBN1/CPLX2                         |
| 4189 tags=50%, 23643/9641GO_BP  | LY96/IKBKE/BIRC3/IRF3/IRF7/CD300LF/UBE2I |
| 6037 tags=68%, 6364/29108GO_BP  | CCL20/PYCARD/STK39/CCL5/ADAM8/CXCL13/XC  |
| 563 tags=53%, 216/26007/GO_BP   | ALDH1A1/TKFC/GLYCTK/KHK/PFKFB1/SORD/FBP  |
| 764 tags=47%, 1149/11488GO_BP   | CIDEA/OSBPL11/PPARA/ENPP1/FITM1/APOC4/P  |
| 1484 tags=40%, 1215/5667GO_BP   | CMA1/SUCNR1/CTSG/AGTR1/ACE2/CES1/ENPEP/I |
| 759 tags=28%, 2643/10588GO_BP   | GCH1/MTHFS/SHMT1/ALDH1L1/MTHFD1/PIPOX/F  |
| 1464 tags=19%, 8864/6530/GO_BP  | PER2/SLC6A2/DRD1/SLC1A2/SLC6A1           |
| 1155 tags=80%, 11160/1061GO_BP  | ERLIN2/ERLIN1/SOD1/APOE                  |
| 1155 tags=80%, 11160/1061GO_BP  | ERLIN2/ERLIN1/SOD1/APOE                  |
| 1155 tags=80%, 11160/1061GO_BP  | ERLIN2/ERLIN1/SOD1/APOE                  |
| 6436 tags=58%, 1535/1410/GO_BP  | CYBA/CRYAB/BAK1/FANCD2/HRAS/HSF1/BAX/PR  |
| 2246 tags=25%, 2119/7040/GO_BP  | ETV5/TGFB1/FLNA/ITGB2/AGRN/SLC7A11/DLG3  |
| 6450 tags=77%, 27347/6352GO_BP  | STK39/CCL5/SLC12A2/CCL26/PIK3CD/CXCL13/I |
| 3362 tags=32%, 6280/2919/GO_BP  | S100A9/CXCL1/CXCL6/LCN2/PGC/CXCL8/CXCL5  |
| 6486 tags=49%, 5984/54913GO_BP  | RFC4/RPP25/EXO1/BOP1/RNASEH2A/FEN1/POLD  |
| 3813 tags=36%, 8877/54209GO_BP  | SPHK1/TREM2/PYCARD/LGALS9/TYROBP/RIPK2/I |
| 1188 tags=19%, 6690/23236GO_BP  | SPINK1/PLCB1/ZP3                         |
| 5598 tags=69%, 1601/9094/GO_BP  | DAB2/UNC119/DNAJC6/HIP1R/DNM2/TNK2/AAK1  |
| 3756 tags=26%, 4316/891/4GO_BP  | MMP7/CCNB1/ASNS/CYBA/MDK/SOX9/SLC2A1/CO  |
| 1471 tags=24%, 6662/10083GO_BP  | SOX9/USH1C/PROM1/THY1                    |
| 5765 tags=71%, 57402/6352GO_BP  | S100A14/CCL5/CREB3/SERPINE1/PLA2G7/CCR1  |
| 2472 tags=28%, 4192/10631GO_BP  | MDK/POSTN/PLXNA1/SRC/GSTP1/DDR1/PLAU/IG  |
| 3774 tags=42%, 4321/1277/GO_BP  | MMP12/COL1A1/POSTN/SRC/MMP14/MELTF/FBLN  |
| 5037 tags=50%, 4323/56833GO_BP  | MMP14/SLAMF8/SYK/HMGB3/NCKAP1L/CARD11/N  |
| 6340 tags=64%, 3159/55247GO_BP  | HMGA1/NEIL3/FEN1/POLD1/SIRT6/APEX2/PCNA  |
| 4243 tags=49%, 2119/9181/GO_BP  | ETV5/ARHGEF2/ASPM/FZD7/NUMBL/LEF1/FGFR1  |
| 644 tags=36%, 10551/1535GO_BP   | AGR2/CYBA/ADA/ADORA1                     |
| 1188 tags=27%, 6662/6714/GO_BP  | SOX9/SRC/ZP3                             |
| 3648 tags=32%, 8877/1728/GO_BP  | SPHK1/NQO1/PYCR1/LCN2/CRYAB/CDK1/COL1A1  |
| 5169 tags=56%, 6364/29108GO_BP  | CCL20/PYCARD/STK39/CCL5/ADAM8/CXCL13/CC  |
| 3246 tags=44%, 56833/9296GO_BP  | SLAMF8/ATP6V1F/ATP6VOB/ATP6VOD2/ATP6V1C  |
| 2791 tags=47%, 3159/6604/GO_BP  | HMGA1/SMARCD3/SMARCD1/MAP1S/SMARCA4/SET  |
| 1917 tags=57%, 29923/6279GO_BP  | HILPDA/S100A8/FZD1/CD68                  |
| 3723 tags=71%, 3561/3718/GO_BP  | IL2RG/JAK3/CD300LF/IL4R/PTPN2            |
| 4797 tags=47%, 2810/1869/GO_BP  | SFN/E2F1/BAK1/YWHAZ/BAX/SLC9A1/SLC35F6/I |
| 7686 tags=71%, 3838/23636GO_BP  | KPNA2/NUP62/RAN/NUP210/VPS37C/NUP93/NUP  |
| 2768 tags=80%, 65010/6558GO_BP  | SLC26A6/SLC12A2/P2RY6/BEST1              |
| 3505 tags=100%, 1736/10576GO_BP | DKC1/CCT2/CCT4/TCP1/WRAP53               |
| 2865 tags=60%, 7076/397/8GO_BP  | TIMP1/ARHGDIB/CALR                       |
| 4451 tags=80%, 3614/4830/GO_BP  | IMPDH1/NME1/NME2/IMPDH2/NME6/NME7/NME3/I |
| 4390 tags=52%, 23149/508GO_BP   | FCHO1/ASAP1/MICALL1/PLEKHM2/EHD2/BIN2/DI |
| 4626 tags=52%, 116372/16GO_BP   | LYPD1/DAB2/TGFB1/RHOQ/PKDCC/AP2M1/CSK/TI |
| 2803 tags=50%, 6692/10653GO_BP  | SPINT1/SPINT2/ST14/SOCS3/FGFR2/GRB2      |
| 5009 tags=39%, 8877/1728/GO_BP  | SPHK1/NQO1/PYCR1/LCN2/CDK1/SRC/MAPK13/E  |

|                                |                                          |
|--------------------------------|------------------------------------------|
| 4477 tags=38%, 9168/822/1GO_BP | TMSB10/CAPG/CRYAB/PFN2/STMN1/SRC/DKK1/PI |
| 7144 tags=55%, 4321/9641/GO_BP | MMP12/IKBKE/IRAK1/MX2/SCRIB/TRIM6/GBP2/1 |
| 7686 tags=71%, 3838/23636GO_BP | KPNA2/NUP62/RAN/NUP210/VPS37C/NUP93/NUP  |
| 202 tags=27%, 5047/27242GO_BP  | PAEP/TNFRSF21/LGALS9                     |
| 6450 tags=49%, 2302/7305/GO_BP | FOXJ1/TYROBP/CYBB/IGF2BP2/CD74/PTAFR/HS  |
| 1251 tags=25%, 8864/5174/GO_BP | PER2/PDZK1/SLC17A3/SLC25A18/SLC16A12/SL  |
| 778 tags=19%, 948/32/348GO_BP  | CD36/ACACB/APOE/FITM1/LIPG/APOC4/C3/PLI  |
| 5500 tags=39%, 22974/2056GO_BP | TPX2/EPO/DUSP9/CDK1/SRC/ECT2/IQGAP3/STK  |
| 4015 tags=41%, 79574/3383GO_BP | EPS8L3/ICAM1/PFN2/RCC2/PLEK/HRAS/CSF1R/1 |
| 2970 tags=67%, 578/4237/5GO_BP | BAK1/MFAP2/BAX/HMGNI                     |
| 2103 tags=33%, 100133941/GO_BP | CD24/FOXJ1/IQGAP1/PROM1/BASP1/JAG1       |
| 2924 tags=44%, 6692/10653GO_BP | SPINT1/SPINT2/TRIM28/ST14/LEF1/WNT7B/CD  |
| 1113 tags=51%, 9/4257/679GO_BP | NAT1/MGST1/SULT1A2/FMO2/ACSM1/MGST2/GST  |
| 3190 tags=43%, 10397/215/GO_BP | NDRG1/ABCD1/CXCR4/MYRF/FA2H/EPB41L3      |
| 797 tags=27%, 717/5627/7GO_BP  | C2/PROS1/C5/SERPING1/C1S/CFI/CPN1/HPN/C  |
| 5194 tags=64%, 54503/2544GO_BP | ZDHC13/SLC41A1/TUSC3/CNNM4/MMGT1/NIPAL   |
| 4297 tags=33%, 388610/669GO_BP | TRNP1/SPINT1/MDK/DBN1/MELK/SPINT2/TGFB1  |
| 2665 tags=36%, 29108/960/GO_BP | PYCARD/CD44/CD74/MUC1/ZNF385A/MIF/NUPR1  |
| 545 tags=19%, 5295/6715/GO_BP  | PIK3R1/SRD5A1/ASS1/SOCS2/F7/GHR/CPS1     |
| 2103 tags=29%, 100133941/GO_BP | CD24/FOXJ1/IQGAP1/PROM1/BASP1/JAG1       |
| 3955 tags=57%, 991/5347/2GO_BP | CDC20/PLK1/UBE2S/MAD2L1/MAD2L2/FBXO5/DNI |
| 2865 tags=80%, 3108/3122/GO_BP | HLA-DMA/HLA-DRA/HLA-DMB/CALR             |
| 146 tags=40%, 29089/2733GO_BP  | UBE2T/UBE2S                              |
| 3813 tags=36%, 8877/54209GO_BP | SPHK1/TREM2/PYCARD/LGALS9/TYROBP/RIPK2/1 |
| 4797 tags=48%, 2810/1869/GO_BP | SFN/E2F1/BAK1/YWHAZ/BAX/SLC35F6/BMF/HIP  |
| 6479 tags=38%, 6696/7345/GO_BP | SPP1/UCHL1/S100A6/RAP1GAP/LIMK1/DBN1/ST  |
| 3842 tags=32%, 6280/11239GO_BP | S100A9/EGLN3/PLK1/TREM2/PYCARD/ENO1/CTS  |
| 3692 tags=38%, 5361/7040/GO_BP | PLXNA1/TGFB1/LAMA5/EDA/FGFR1/TGM2/PDGFA  |
| 5315 tags=36%, 100133941/GO_BP | CD24/CYBA/EPO/BAK1/ITPR3/NMB/LPAR2/TGFB  |
| 4950 tags=46%, 7040/9156/GO_BP | TGFB1/EXO1/CLCF1/BATF/TFRC/TCF3/PRKDC/M  |
| 3835 tags=82%, 3684/3689/GO_BP | ITGAM/ITGB2/PTAFR/SYK/GRN/CD300A/ABR/FC  |
| 4398 tags=36%, 5538/6616/GO_BP | PPT1/SNAP25/SLC7A11/NPTX2/NRGN/BRSK1/RG  |
| 6757 tags=59%, 1401/29108GO_BP | CRP/PYCARD/LGALS9/CD74/SYK/TMSB4X/DDIT3  |
| 2206 tags=50%, 5901/4869/GO_BP | RAN/NPM1/RRS1/ZNF593                     |
| 1 tags=12%, 6696 GO_BP         | SPP1                                     |
| 4277 tags=75%, 1601/8898/GO_BP | DAB2/MTMR2/EZR/MSN/PTPN23/VPS11          |
| 1275 tags=29%, 23411/9971GO_BP | SIRT1/NR1H4/EGR1/ELOVL6/ACADVL/NFYB/ERL  |
| 3509 tags=55%, 8754/6850/GO_BP | ADAM9/SYK/CCL5/CD3E/FERMT1/NCKAP1L/CXCL  |
| 4573 tags=50%, 2810/4831/GO_BP | SFN/NME2/SULT2B1/VDR/OVOL2/KDF1/NOTCH1/  |
| 4258 tags=55%, 23616/2302GO_BP | SH3BP1/FOXJ1/SCRIB/FSCN1/MSN/PTK7/SLC9A  |
| 4070 tags=36%, 5973/4321/GO_BP | RENBP/MMP12/GLA/NUDT1/TGFB1/ADA/HMMR/GN  |
| 1442 tags=39%, 153/135/36GO_BP | ADRB1/ADORA2A/ITGA1/SOD1/GCH1/EDNRB/APO  |
| 5140 tags=62%, 1627/4794/GO_BP | DBN1/NFKBIE/TONSL/FLNA/TMSB4X/MDFI/SRI/  |
| 3362 tags=44%, 4192/3576/GO_BP | MDK/CXCL8/RAC2/S100A14/CD74/C3AR1/NCKAP  |
| 4535 tags=42%, 7040/3161/GO_BP | TGFB1/HMMR/GPC4/GPC3/CD44/AGRN/SDC3/VCA  |
| 819 tags=47%, 435/2752/2GO_BP  | ASL/GLUL/GLUD1/ASS1/NAGS/GLS2/OTC/CPS1   |
| 905 tags=42%, 3949/84649GO_BP  | LDLR/DGAT2/PLIN5/GPLD1/RGN               |
| 764 tags=50%, 1149/11488GO_BP  | CIDEA/OSBPL11/PPARA/FITM1/APOC4/PLIN5    |
| 677 tags=33%, 7367/7363/GO_BP  | UGT2B17/UGT2B4/UGT2B7/UGT2B15            |
| 2013 tags=27%, 6692/4192/GO_BP | SPINT1/MDK/LIF/SERPINE2/TGFB1/CLCF1/CXC  |
| 4825 tags=44%, 2305/5580/GO_BP | FOXM1/PRKCD/EEF1E1/ANKRD1/ZNF385A/NPAS2  |



|                                 |                                          |
|---------------------------------|------------------------------------------|
| 4189 tags=44%, 23643/9641GO_BP  | LY96/IKBKE/BIRC3/IRF3/IRF7/CD300LF/UBE2I |
| 7806 tags=54%, 8877/5535GO_BP   | SPHK1/LAPTM4B/ANXA2/CTSC/DNM1/SERPINE2/  |
| 1060 tags=43%, 5020/552/GO_BP   | OXT/AVPR1A/CRHBP                         |
| 1254 tags=60%, 1841/7298/GO_BP  | DTYMK/TYMS/DCTPP1                        |
| 1320 tags=39%, 26291/150GO_BP   | FGF21/SIK1/SIRT1/MOGAT1/ABHD2/CETP/LDLR  |
| 908 tags=34%, 54884/223GO_BP    | RETSAT/FDX1/SHH/CYP11A1/CYP2C18/CYP17A1  |
| 8299 tags=100%, 79339/2621GO_BP | OR51B4/OR2B6/OR1F1/OR2C3/OR51E2/OR7A5/O  |
| 1239 tags=36%, 27244/997GO_BP   | SESN1/CCS/MT1H/ESD/MT1F/GSTO1/ADH5/MT1B  |
| 797 tags=27%, 717/5627/GO_BP    | C2/PROS1/C5/SERPING1/C1S/CFI/CPN1/HPN/C  |
| 7115 tags=45%, 54997/542GO_BP   | TESC/TREM2/LGALS3/LIF/CSF1/TYROBP/TGFB1  |
| 3106 tags=62%, 5580/4869/GO_BP  | PRKCD/NPM1/DDX11/RPS3/GZMA               |
| 7622 tags=68%, 6949/1124GO_BP   | TCOF1/GTF3C6/NABP2/INTS8/TAF6/POLR2G/CD  |
| 1500 tags=29%, 664/11221/GO_BP  | BNIP3/DUSP10/ADRB1/SLC2A4/SIRT1/NUDT7/P  |
| 1379 tags=35%, 10580/985GO_BP   | SORBS1/EPM2AIP1/IGF1/ENPP1/IRS1/IRS2/GC  |
| 6914 tags=53%, 126789/95GO_BP   | PUSL1/APOBEC3B/WDR4/APOBEC3C/RPUSD1/JMJ  |
| 6995 tags=53%, 6714/1601/GO_BP  | SRC/DAB2/CORO1A/MTMR2/YKT6/EZR/SNX8/RAB  |
| 1736 tags=24%, 7345/5420GO_BP   | UCHL1/TREM2/CSF1/SQSTM1/EIF4EBP1/HK2/KC  |
| 890 tags=27%, 3157/1543/GO_BP   | HMGCS1/CYP1A1/ALDH8A1/HMGCS2             |
| 2103 tags=25%, 4318/1001GO_BP   | MMP9/CD24/FOXJ1/LIF/IQGAP1/PROM1/PRKX/B  |
| 6999 tags=71%, 3965/8767/GO_BP  | LGALS9/RIPK2/ELF4/SYK/IL18/EBI3/CD3E/IR  |
| 6450 tags=49%, 2302/7305/GO_BP  | FOXJ1/TYROBP/CYBB/IGF2BP2/CD74/PTAFR/HS  |
| 4594 tags=22%, 2810/3880/GO_BP  | SFN/KRT19/TGM3/KRT23/DSG2/CTSV/KRT17/PI  |
| 103 tags=33%, 8993/11477GO_BP   | PGLYRP1/PGLYRP2                          |
| 103 tags=33%, 8993/11477GO_BP   | PGLYRP1/PGLYRP2                          |
| 842 tags=33%, 364/366 GO_BP     | AQP7/AQP9                                |
| 4114 tags=32%, 2810/1515/GO_BP  | SFN/CTSV/KRT17/MAFG/CD109/EZH2/NME2/ESR  |
| 6686 tags=57%, 7040/2363GO_BP   | TGFB1/NUP62/NUP210/MAP2K2/POLR2G/NUP93/  |
| 4062 tags=86%, 22943/8324GO_BP  | DKK1/FZD7/COL5A1/COL5A2/SFRP2/MESP1      |
| 2863 tags=28%, 483/476/GO_BP    | ATP1B3/ATP1A1/UPK3A/SLC12A2/SLC12A9/SLC  |
| 7621 tags=61%, 3984/6659/GO_BP  | LIMK1/SOX4/TSPO/MAD2L1/MAD2L2/ISG15/COP  |
| 2909 tags=50%, 1601/7040/GO_BP  | DAB2/TGFB1/NUP93/PARP1/TGFB3/RBPMS       |
| 1221 tags=64%, 83594/570GO_BP   | NUDT12/PDXP/CYP4F11/MTHFS/NUDT7/ACAT1/A  |
| 954 tags=30%, 326625/25GO_BP    | MMAB/MMACHC/PNPO/MMAA/CYP27A1/RGN/CYP3A  |
| 4119 tags=38%, 2810/1001GO_BP   | SFN/CD24/SOX9/FOXJ1/LIF/S1PR2/NME2/PROM  |
| 1493 tags=41%, 4792/4035/GO_BP  | NFKBIA/LRP1/SIRT1/APOE/LIPG/SCP2/ABCB4/  |
| 1493 tags=41%, 4792/4035/GO_BP  | NFKBIA/LRP1/SIRT1/APOE/LIPG/SCP2/ABCB4/  |
| 1100 tags=22%, 11261/337GO_BP   | CHP1/HYAL1/SLC38A3/GLPD1/PCK1            |
| 8557 tags=67%, 63875/618GO_BP   | MRPL17/MRPS12/MRPL47/MRPL9/MRPS23/MRPL1  |
| 6625 tags=54%, 22883/680GO_BP   | CLSTN1/STX3/SNAP25/RAB31/SCRIB/RAB34/AN  |
| 3800 tags=44%, 9518/963/GO_BP   | GDF15/CD53/FLOT1/EHD1/CXCL9/EHD2/IL4R/C  |
| 5036 tags=42%, 5538/4097/GO_BP  | PPT1/MAFG/SLAMF8/ATP6V1F/SLC26A6/GRN/AT  |
| 1990 tags=38%, 4323/1311/GO_BP  | MMP14/COMP/SIRT6/FGFR3/SIX2              |
| 5226 tags=43%, 4321/8767/GO_BP  | MMP12/RIPK2/HAVCR2/IRF3/STAT1/IRF7/HSPD  |
| 5255 tags=42%, 2207/7305/GO_BP  | FCER1G/TYROBP/STX3/TAX1BP3/RAB11FIP5/GPI |
| 6174 tags=40%, 54997/542GO_BP   | TESC/TREM2/LIF/CSF1/TYROBP/TGFB1/C1QC/C  |
| 3833 tags=67%, 50807/232GO_BP   | ASAP1/PLEKHM2/DNM2/SH3GLB1               |
| 6603 tags=52%, 4192/3965/GO_BP  | MDK/LGALS9/RIPK2/ACP5/SYK/PLCB1/LTB/JAK  |
| 4643 tags=43%, 29108/106GO_BP   | PYCARD/POSTN/LGALS9/RIPK2/HAVCR2/CD74/S  |
| 1140 tags=28%, 4321/2316/GO_BP  | MMP12/FLNA/CD44/DDR1/CD151/RHOC/COL5A1/  |
| 6234 tags=42%, 2302/2723GO_BP   | FOXJ1/ARHGEF16/ECT2/RCC2/TAX1BP3/SCRIB/  |
| 5876 tags=56%, 27350/117GO_BP   | APOBEC3C/TRIM6/TRIM28/CCL5/TRIM11/SLPI/  |

|                                |                                         |
|--------------------------------|-----------------------------------------|
| 688 tags=14%, 10551/1535GO_BP  | AGR2/CYBA/ADA/ADORA1/STK39              |
| 202 tags=30%, 5047/27242GO_BP  | PAEP/TNFRSF21/LGALS9                    |
| 7804 tags=57%, 55353/302/GO_BP | LAPTM4B/ANXA2/ATP13A2/PPT1/CORO1A/GRN/R |
| 3465 tags=67%, 1601/22945GO_BP | DAB2/DKK1/GPC3/MLLT3/PLEKHA4/ABL1       |
| 6181 tags=47%, 7040/23636GO_BP | TGFB1/NUP62/RAN/LIN28B/NUP210/MAP2K2/PO |
| 3698 tags=50%, 1728/9056/GO_BP | NQO1/SLC7A7/SLC7A11/PSMB9/PSMD14/PSMD2/ |
| 2974 tags=27%, 3965/84868GO_BP | LGALS9/HAVCR2/CORO1A/UNC13D/IL18/TUBB/S |
| 4797 tags=46%, 2810/1869/GO_BP | SFN/E2F1/BAK1/YWHAZ/BAX/SLC35F6/BMF/HIP |
| 6229 tags=50%, 7345/9493/GO_BP | UCHL1/KIF23/TMEM201/KIF3C/DTNBP1/MAP2/H |
| 884 tags=64%, 5565/1376/GO_BP  | PRKAB2/CPT2/PRKAG2/ACACB/SLC25A20/CPT1A |
| 483 tags=40%, 8660/10998GO_BP  | IRS2/SLC27A5                            |
| 3228 tags=43%, 3965/56835GO_BP | LGALS9/SLAMF8/TRPM2/CCL5/CXCR4/CCR1/CAL |
| 3259 tags=42%, 960/972/95GO_BP | CD44/CD74/EEF1E1/ANKRD1/ZNF385A/MIF/SPR |
| 3753 tags=53%, 3675/5621/GO_BP | ITGA3/PRNP/ITPKA/MTMR2/CTTN/HOMER1/ZMYN |
| 5315 tags=38%, 1535/2056/GO_BP | CYBA/EPO/BAK1/ITPR3/TGFB1/CORO1A/P2RX4/ |
| 3509 tags=47%, 1601/22945GO_BP | DAB2/DKK1/GPC3/MLLT3/PLEKHA4/ABL1/SFRP2 |
| 1320 tags=39%, 26291/1500GO_BP | FGF21/SIK1/SIRT1/MOGAT1/ABHD2/CETP/LDLR |
| 663 tags=20%, 4843/135/8GO_BP  | NOS2/ADORA2A/PLA2G12A/TNFSF11/SLC38A2/S |
| 6199 tags=49%, 2810/5880/GO_BP | SFN/RAC2/ECT2/TGFB1/ITGAM/FLNA/ITGB2/CE |
| 7150 tags=59%, 2207/972/5GO_BP | FCER1G/CD74/IL18/TRAF2/TRIM6/MIF/MAPK3/ |
| 4291 tags=33%, 1869/11151GO_BP | E2F1/CORO1A/MICALL1/ARPC3/SORT1/RAB35/E |
| 3398 tags=50%, 7187/57162GO_BP | TRAF3/PELI1/PELI3                       |
| 3723 tags=83%, 1435/1436/GO_BP | CSF1/CSF1R/DOK1/MST1R/PTPN2             |
| 3953 tags=50%, 3297/3298/GO_BP | HSF1/HSF2/HSF4                          |
| 3813 tags=38%, 8877/54209GO_BP | SPHK1/TREM2/PYCARD/LGALS9/TYROBP/RIPK2/ |
| 5771 tags=47%, 5570/9212/GO_BP | PKIB/AURKB/NEK2/NABP2/PRKDC/MAPK3/ACD/P |
| 4367 tags=43%, 4192/1277/GO_BP | MDK/COL1A1/DAB2/TGFB1/BAMBI/EZH2/GLIPR2 |
| 3072 tags=43%, 302/4001/8GO_BP | ANXA2/LMN1/RIPK2/PLCB1/CFL1/SNRPA1/MIF  |
| 1080 tags=26%, 6513/2056/GO_BP | SLC2A1/EPO/AKR1B1/PKN1/ARHGEF2/YBX3/SLC |
| 2356 tags=57%, 5888/8438/GO_BP | RAD51/RAD54L/XRCC3/SWI5                 |
| 4013 tags=30%, 4316/1535/GO_BP | MMP7/CYBA/AURKB/SOX9/SLC2A1/EPO/CRYAB/C |
| 4013 tags=30%, 4316/1535/GO_BP | MMP7/CYBA/AURKB/SOX9/SLC2A1/EPO/CRYAB/C |
| 1861 tags=50%, 578/581/70GO_BP | BAK1/BAX/TGM2/BCAP31                    |
| 830 tags=38%, 54209/1515GO_BP  | TREM2/CTSV/CDKN2D                       |
| 3668 tags=42%, 4192/3383/GO_BP | MDK/ICAM1/PTAFR/PLCB1/IL27RA/THY1/ADAM8 |
| 5182 tags=38%, 8877/991/5GO_BP | SPHK1/CDC20/PLK1/UBE2S/TRIB3/MAGEC2/FAN |
| 5485 tags=68%, 6628/54512GO_BP | SNRPB/EXOSC4/SNRPE/NCBP2/SNRPF/LSM10/SS |
| 4453 tags=68%, 5973/91375GO_BP | RENBP/UAP1L1/GNPDA1/GFPT2/TSTA3/UXS1/NA |
| 3435 tags=32%, 994/995/25GO_BP | CDC25B/CDC25C/PLCB1/CDC25A/MSX1/WNT4/LF |
| 6306 tags=62%, 3838/7040/GO_BP | KPNA2/TGFB1/GAPDH/TYMS/ITGAV/SCRIB/ZC3H |
| 5475 tags=44%, 115908/419GO_BP | CTHRC1/MDK/SOX9/DAB2/DKK1/GPC3/BICC1/FZ |
| 5830 tags=63%, 6372/2207/GO_BP | CXCL6/FCER1G/LGALS9/RAC2/ITGAM/ITGB2/PT |
| 3756 tags=50%, 3976/1435/GO_BP | LIF/CSF1/TGFB1/IL34/HCLS1/FADD/CASP8    |
| 6656 tags=79%, 3965/6352/GO_BP | LGALS9/CCL5/PRELID1/PDCD1/ADAM8/IDO1/LG |
| 425 tags=43%, 23743/5525GO_BP  | BHMT2/ADI1/BHMT                         |
| 425 tags=43%, 23743/5525GO_BP  | BHMT2/ADI1/BHMT                         |
| 425 tags=43%, 23743/5525GO_BP  | BHMT2/ADI1/BHMT                         |
| 483 tags=29%, 8660/8529 GO_BP  | IRS2/CYP4F2                             |
| 5806 tags=61%, 27350/1178GO_BP | APOBEC3C/TRIM6/TRIM28/CCL5/SLPI/ISG15/Z |
| 908 tags=27%, 8877/54209GO_BP  | SPHK1/TREM2/CTSC/GRN                    |
| 3727 tags=35%, 8877/54209GO_BP | SPHK1/TREM2/CTSC/HAVCR2/CD74/GRN/VSIG4/ |

|                                |                                          |
|--------------------------------|------------------------------------------|
| 3063 tags=32%, 9133/3965/GO_BP | CCNB2/LGALS9/TGFB1/CORO1A/JAK3/BAX/TCIR  |
| 1320 tags=47%, 26291/9971GO_BP | FGF21/NR1H4/APOC2/LIPG/GPIHBP1/APOC1/GP  |
| 7177 tags=64%, 6633/6632/GO_BP | SNRPD2/SNRPD1/SF3A2/NOL3/SNRPE/TXNL4A/S  |
| 6181 tags=57%, 2810/1869/GO_BP | SFN/E2F1/BAK1/YWHAZ/BAX/SLC35F6/BMF/NOL  |
| 7684 tags=53%, 29089/2735GO_BP | UBE2T/UBE2S/CCNF/DTL/BLMH/RUSC1/PSMB9/T  |
| 6730 tags=47%, 8877/29108GO_BP | SPHK1/PYCARD/FOXM1/CRYAB/DUSP9/LGALS9/M  |
| 4792 tags=35%, 23616/5475GO_BP | SH3BP1/FBLIM1/ITGB4/SRC/MMP14/POF1B/ECT  |
| 1959 tags=50%, 4521/100/7GO_BP | NUDT1/ADA/DCTPP1/ITPA                    |
| 2401 tags=30%, 7301/1192/GO_BP | TYRO3/CLIC1/SERPINE2/DSG2/LGALS1/FLNA/F  |
| 2852 tags=33%, 4323/9518/GO_BP | MMP14/GDF15/CD53/FLOT1/EHD1/CXCL9/EHD2/  |
| 4258 tags=38%, 23616/1741GO_BP | SH3BP1/DLG3/SCRIB/MTCL1/MSN/PTK7/PDZD11, |
| 752 tags=20%, 79703 GO_BP      | C11orf80                                 |
| 6166 tags=56%, 2316/6949/GO_BP | FLNA/TCOF1/MAPK3/CD3EAP/SMARCA4/DDX11/P  |
| 4693 tags=39%, 4605/9242/GO_BP | MYBL2/MSC/PFKP/ICAM1/PTP4A3/LAPTM5/SRM/  |
| 4693 tags=39%, 4605/9242/GO_BP | MYBL2/MSC/PFKP/ICAM1/PTP4A3/LAPTM5/SRM/  |
| 2486 tags=25%, 54997/5420GO_BP | TESC/TREM2/LIF/CSF1/TYROBP/TGFB1/CD74/I  |
| 4797 tags=48%, 2810/1869/GO_BP | SFN/E2F1/BAK1/YWHAZ/BAX/SLC35F6/BMF/HIP  |
| 6757 tags=61%, 1401/29108GO_BP | CRP/PYCARD/LGALS9/CD74/SYK/TMSB4X/DDIT3, |
| 2510 tags=39%, 8877/2717/GO_BP | SPHK1/GLA/PPT1/PRKCD/NEU1/GM2A/SMPD2/SM  |
| 4520 tags=50%, 2207/6850/GO_BP | FCER1G/SYK/FGR/IL4R/VAMP8/STXBP1/ADORA2  |
| 4520 tags=50%, 2207/6850/GO_BP | FCER1G/SYK/FGR/IL4R/VAMP8/STXBP1/ADORA2  |
| 5170 tags=57%, 6628/1478/GO_BP | SNRPB/CSTF2/SNRPE/NCBP2/SNRPF/LSM10/CPS  |
| 4603 tags=40%, 4192/3965/GO_BP | MDK/LGALS9/RIPK2/SYK/PLCB1/LTB/IRF1/MAP  |
| 2279 tags=23%, 6696/2056/GO_BP | SPP1/EPO/CDK1/TSP0/TYROBP/LGALS1/FOLR1/  |
| 5799 tags=39%, 440/1535/9GO_BP | ASNS/CYBA/AURKB/CRYAB/PLEKHB1/ICAM1/BAK  |
| 6544 tags=47%, 7345/5347/GO_BP | UCHL1/PLK1/APOA4/LPCAT1/LAPTM4B/TREM2/H  |
| 1372 tags=30%, 94121/6403GO_BP | SYTL4/SELP/ITIH4/TIMP3/IGF1/CLU/CDC37L1, |
| 1084 tags=17%, 6446/5020/GO_BP | SGK1/OXT/LDLR/ASA2/ACO1/WNK3/CD36/LRCD   |
| 1354 tags=62%, 26063/1384GO_BP | DECR2/CRAT/ETFA/DECR1/PCCA/ACADVL/ABHD2, |
| 4626 tags=48%, 116372/160GO_BP | LYPD1/DAB2/TGFB1/RHOQ/PKDC/GDI1/ITGB1B   |
| 7249 tags=66%, 6688/4582/GO_BP | SPI1/MUC1/NAA40/RUVBL1/BRCA1/MCRS1/ACTL  |
| 7168 tags=52%, 6688/26147GO_BP | SPI1/PHF19/SNRPB/EZH2/DNMT1/PRMT1/WDR4/  |
| 555 tags=27%, 8864/135/5GO_BP  | PER2/ADORA2A/ACE2/AVPR1A/KMO/ARG1/SLC38, |
| 6453 tags=47%, 1401/5047/GO_BP | CRP/PAEP/PYCARD/MDK/TNFRSF21/MMP12/POST  |
| 3813 tags=36%, 8877/54209GO_BP | SPHK1/TREM2/PYCARD/LGALS9/TYROBP/RIPK2/  |
| 302 tags=37%, 1806/9615/GO_BP  | DPYD/GDA/SHMT1/XDH/MTHFD1/AOX1/TTR       |
| 4597 tags=33%, 1277/3691/GO_BP | COL1A1/ITGB4/SRC/CSF1/TGFB1/COL1A2/LAMB  |
| 4091 tags=52%, 1601/22943GO_BP | DAB2/DKK1/GPC3/MLLT3/CSNK1E/PLEKHA4/CSN  |
| 6181 tags=47%, 7040/23636GO_BP | TGFB1/NUP62/RAN/LIN28B/NUP210/MAP2K2/PO  |
| 4337 tags=27%, 6696/2539/GO_BP | SPP1/G6PD/PAEP/RGS2/SOX9/POSTN/ITM2C/TS  |
| 759 tags=39%, 2643/10588GO_BP  | GCH1/MTHFS/SHMT1/ALDH1L1/MTHFD1/PIPOX/F  |
| 7680 tags=61%, 899/5698/1GO_BP | CCNF/PSMB9/PSMD14/PSMD2/PSMB2/PSME3/KIF  |
| 2867 tags=50%, 5580/7186/GO_BP | PRKCD/TRAFF2/CCL2/CDK5/PRKCI             |
| 5363 tags=62%, 9040/15067GO_BP | UBE2M/COPS9/DCUN1D5/RBX1/RNF7/NAE1/RPL5, |
| 1115 tags=41%, 23464/6799GO_BP | GCAT/SULT1A2/PRDX3/PCBD1/AMT/HBA2/FAH/M  |
| 6199 tags=48%, 1869/55544GO_BP | E2F1/RBM38/IGF2BP1/PKP3/YBX3/MAPKAPK2/D  |
| 3315 tags=50%, 6662/7849/GO_BP | SOX9/PAX8/WNT4                           |
| 986 tags=41%, 255027/863GO_BP  | MPV17L/CBFA2T3/FYN/PPARA/HDAC6/PPARGC1A, |
| 4451 tags=78%, 4830/4831/GO_BP | NME1/NME2/CAD/NME6/NME7/NME3/NME4        |
| 927 tags=19%, 56898/1667GO_BP  | BDH2/MMAA/AMN/CLYBL/ALAS1/ALAD/AMBP/CYP  |
| 3240 tags=30%, 6510/3576/GO_BP | SLC1A5/CXCL8/SLC52A2/CDK1/ICAM1/LGALS9/  |

|                                 |                                         |
|---------------------------------|-----------------------------------------|
| 3240 tags=30%, 6510/3576/GO_BP  | SLC1A5/CXCL8/SLC52A2/CDK1/ICAM1/LGALS9/ |
| 3240 tags=30%, 6510/3576/GO_BP  | SLC1A5/CXCL8/SLC52A2/CDK1/ICAM1/LGALS9/ |
| 3240 tags=30%, 6510/3576/GO_BP  | SLC1A5/CXCL8/SLC52A2/CDK1/ICAM1/LGALS9/ |
| 3176 tags=64%, 3159/3665/GO_BP  | HMGA1/IRF7/PPIA/HCF1/BANF1/XRCC6/XRCC4  |
| 6337 tags=48%, 1869/5554/GO_BP  | E2F1/RBM38/IGF2BP1/PKP3/YBX3/MAPKAPK2/D |
| 3559 tags=75%, 259266/925/GO_BP | ASPM/NUMBL/LEF1/FGFR1/FGFR2/AKNA        |
| 4701 tags=47%, 9156/10535/GO_BP | EXO1/RNASEH2A/POLD1/PCNA/LIG1/MSH2/MUTY |
| 5765 tags=49%, 3959/23645/GO_BP | LGALS3BP/LY96/NCF2/TYROBP/DCDC2/LSP1/NC |
| 3903 tags=41%, 6714/3055/GO_BP  | SRC/HCK/DDR1/IQGAP1/MAPK3/LYN/FGR/LCK/S |
| 487 tags=20%, 9518/GO_BP        | GDF15                                   |
| 2689 tags=60%, 5831/5832/GO_BP  | PYCR1/ALDH18A1/PYCR2                    |
| 2689 tags=60%, 5831/5832/GO_BP  | PYCR1/ALDH18A1/PYCR2                    |
| 1079 tags=40%, 3297/581/GO_BP   | HSF1/BAX                                |
| 5652 tags=44%, 6696/7040/GO_BP  | SPP1/TGFB1/STC2/CDKN2D/GDAP1/TNC/IL15/V |
| 1026 tags=29%, 5092/2643/GO_BP  | PCBD1/GCH1/MTHFS/QDPR/SHMT1/ALDH1L1/MTH |
| 854 tags=28%, 1244/2706/GO_BP   | ABCC2/GJB2/FOXO1/ERRFI1/SRD5A1/ASS1/SER |
| 4797 tags=51%, 2810/1869/GO_BP  | SFN/E2F1/BAK1/YWHAZ/BAX/SLC35F6/HIP1R/B |
| 2956 tags=33%, 5315/8020/GO_BP  | PKM/HKDC1/ALDOA/IMPDH1/TREM2/ENO2/PFKP/ |
| 499 tags=44%, 291/9962/GO_BP    | SLC25A4/SLC23A2/SLC28A1/AQP9            |
| 676 tags=33%, 10400/2595/GO_BP  | PEMT/GAMT/GNMT                          |
| 4321 tags=32%, 23213/7980/GO_BP | SULF1/SHCBP1/GPC1/ESRP1/CREB3L1/IQGAP1/ |
| 1124 tags=33%, 6608/4040/GO_BP  | SMO/LRP6/HMGCS1/GRAMD1C/RORA/INSIG1/F7/ |
| 339 tags=19%, 4258/66002/GO_BP  | MGST2/CYP4F12/CYP4F3/CYP4F2/CYP4A11     |
| 785 tags=20%, 1583/1586/GO_BP   | CYP11A1/CYP17A1/SERPINA6/APOA1/HSD11B1  |
| 4517 tags=38%, 6692/10655/GO_BP | SPINT1/SPINT2/PLCD3/ST14/LEF1/WNT7B/VAS |
| 6130 tags=63%, 960/972/45/GO_BP | CD44/CD74/MUC1/CDKN2D/ZNF385A/MIF/BCL2L |
| 6422 tags=47%, 7345/5347/GO_BP  | UCHL1/PLK1/APOA4/LAPTM4B/TREM2/HSPB8/PY |
| 1179 tags=56%, 64087/8655/GO_BP | MCCC2/ALDH4A1/GCAT/HDC/PCBD1/AMT/DBT/HM |
| 1496 tags=71%, 55034/5156/GO_BP | MOCOS/MBIP/MOCS2/MOCS1/GPHN             |
| 1496 tags=71%, 55034/5156/GO_BP | MOCOS/MBIP/MOCS2/MOCS1/GPHN             |
| 1496 tags=71%, 55034/5156/GO_BP | MOCOS/MBIP/MOCS2/MOCS1/GPHN             |
| 1275 tags=37%, 23411/9971/GO_BP | SIRT1/NR1H4/C1QTNF3/ANGPTL8/ORMDL3/CETP |
| 884 tags=18%, 1376/51422/GO_BP  | CPT2/PRKAG2/SLC25A13/ACACB/SLC25A20/SLC |
| 884 tags=18%, 1376/51422/GO_BP  | CPT2/PRKAG2/SLC25A13/ACACB/SLC25A20/SLC |
| 6566 tags=48%, 3984/1627/GO_BP  | LIMK1/DBN1/SEMA6A/ARHGAP4/TNFRSF12A/PLX |
| 183 tags=33%, 336/335/GO_BP     | APOA2/APOA1                             |
| 120 tags=50%, 4923/18/65/GO_BP  | NTSR1/ABAT/SLC6A1                       |
| 4207 tags=41%, 284403/895/GO_BP | WDR62/CCNF/CEP131/NUP62/SAC3D1/CHMP4B/B |
| 4936 tags=46%, 5888/4796/GO_BP  | RAD51/TONSL/ALYREF/EME1/PCNA/DDX11/BLM/ |
| 4900 tags=51%, 3925/9181/GO_BP  | STMN1/ARHGEF2/TRIM54/MAPRE1/MID1IP1/MAP |
| 3335 tags=28%, 8612/8877/GO_BP  | PLPP2/SPHK1/ST6GALNAC4/GLA/ELOVL7/B4GAL |
| 6239 tags=81%, 23246/2348/GO_BP | BOP1/PES1/GTPBP4/NHP2/RPL7/SNU13/FTSJ3/ |
| 3420 tags=43%, 79734/578/GO_BP  | KCTD17/BAK1/BAX/TGM2/BCAP31/WFS1/PML/AP |
| 4771 tags=34%, 100133941/GO_BP  | CD24/TREM2/EPO/ICAM1/SRC/LIF/TGFB1/RIPK |
| 3158 tags=46%, 6662/6928/GO_BP  | SOX9/HNF1B/HIF1A/ETV6/PAX8/MSX1         |
| 2956 tags=59%, 5315/226/2/GO_BP | PKM/ALDOA/ENO2/PFKP/ENO1/GAPDH/HK2/PGK1 |
| 2956 tags=59%, 5315/226/2/GO_BP | PKM/ALDOA/ENO2/PFKP/ENO1/GAPDH/HK2/PGK1 |
| 2956 tags=59%, 5315/226/2/GO_BP | PKM/ALDOA/ENO2/PFKP/ENO1/GAPDH/HK2/PGK1 |
| 2946 tags=40%, 1601/6597/GO_BP  | DAB2/SMARCA4/HDAC1/HEY1/PHB/NCOR2       |
| 6450 tags=49%, 2302/7305/GO_BP  | FOXJ1/TYROBP/CYBB/IGF2BP2/CD74/PTAFR/HS |
| 3939 tags=29%, 1364/1192/GO_BP  | CLDN4/CLIC1/FXYD3/TTYH3/ANO9/PTAFR/PRNP |

|                                |                                          |
|--------------------------------|------------------------------------------|
| 6300 tags=61%, 7040/5486GO_BP  | TGFB1/PPP1R14D/PRKCD/ADORA1/CD300A/SLC3  |
| 8571 tags=65%, 22943/8767GO_BP | DKK1/RIPK2/GSTP1/PKN1/SYK/DTNBP1/TRAF2/  |
| 6686 tags=47%, 4192/2207/GO_BP | MDK/FCER1G/ICAM1/LGALS9/LGALS3/RIPK2/HA  |
| 297 tags=17%, 1593/1576 GO_BP  | CYP27A1/CYP3A4                           |
| 5755 tags=40%, 54997/8441GO_BP | TESC/C15orf48/NDUFA4L2/COX7B2/SLC2A6/AT  |
| 4792 tags=35%, 23616/547GO_BP  | SH3BP1/FBLIM1/ITGB4/SRC/MMP14/DSG2/POF1  |
| 688 tags=19%, 5997/33844GO_BP  | RGS2/ANO9/PTAFR/PRNP/STK39               |
| 3653 tags=40%, 23616/5361GO_BP | SH3BP1/PLXNA1/SEMA6A/FLNA/PLXNA3/SEMA4A  |
| 6050 tags=56%, 4323/4100/GO_BP | MMP14/MAGEA1/TSPAN15/JAG2/JAG1/GDPD5/HE  |
| 3266 tags=55%, 56833/305GO_BP  | SLAMF8/HCK/GRN/PIK3CD/RPS19/LBP          |
| 766 tags=30%, 10560/9154GO_BP  | SLC19A2/SLC28A1/AQP9                     |
| 2970 tags=50%, 578/4237GO_BP   | BAK1/MFAP2/BAX/HMGN1                     |
| 944 tags=17%, 3155/3157/GO_BP  | HMGCL/HMGCS1/HNF4A/LIMS2/TGFBR3/PROX1/S  |
| 4520 tags=58%, 9536/2012GO_BP  | PTGES/UNC13D/S100A8/CCL5/CXCL13/TNFAIP3  |
| 6199 tags=49%, 2810/1894/GO_BP | SFN/ECT2/TGFB1/FLNA/PRKCD/NUP62/GTSE1/M  |
| 344 tags=40%, 55353/730GO_BP   | LAPTM4B/TYROBP                           |
| 1927 tags=60%, 6790/2592GO_BP  | AURKA/ASPM/FBX05                         |
| 908 tags=40%, 55353/289GO_BP   | LAPTM4B/GRN                              |
| 4326 tags=30%, 6692/7262/GO_BP | SPINT1/PHLDA2/CCNB1/KRT19/CCNB2/CTHRC1/  |
| 5960 tags=42%, 79574/590GO_BP  | EPS8L3/RAP1GAP/FOXO1/EPOR/STMN1/SH3BP1/S |
| 2956 tags=57%, 5315/226GO_BP   | PKM/ALDOA/ENO2/PFKF/ENO1/GAPDH/HK2/PGK1  |
| 2956 tags=57%, 5315/226GO_BP   | PKM/ALDOA/ENO2/PFKF/ENO1/GAPDH/HK2/PGK1  |
| 645 tags=33%, 338440/57GO_BP   | ANO9/PTAFR/PRNP                          |
| 3770 tags=78%, 4085/1045GO_BP  | MAD2L1/MAD2L2/FBX05/RPL23/RPS7/BAG2/RPL  |
| 6566 tags=51%, 4318/1159GO_BP  | MMP9/CTHRC1/ANXA2/LGALS3/TRIB3/BAMBI/RI  |
| 3578 tags=33%, 6696/1159GO_BP  | SPP1/CTHRC1/MDK/BAK1/SRC/TIMP1/RAC2/MMP  |
| 4496 tags=36%, 4192/6662/GO_BP | MDK/SOX9/LIF/CSF1/TGFB1/DKK1/ROBO1/MAGE  |
| 878 tags=18%, 5236/178GO_BP    | PGM1/AGL/GOT1/ENPP1/UGP2/IRS1/IRS2/GCK/  |
| 4695 tags=53%, 3956/100GO_BP   | LGALS1/ADA/BCL3/CDH17/GPR183/MFNG/LFNG/  |
| 3756 tags=53%, 84868/810GO_BP  | HAVCR2/COLEC12/UNC93B1/F2RL1/TNIP2/FLOT  |
| 4321 tags=32%, 3576/1277/GO_BP | CXCL8/COL1A1/POSTN/SULF1/CD44/SHCBP1/GP  |
| 5172 tags=40%, 4192/6275/GO_BP | MDK/S100A4/SOX9/COL1A1/DAB2/TGFB1/BAMBI  |
| 5969 tags=44%, 9212/578GO_BP   | AURKB/BAK1/MAPK13/PBK/DTL/FEN1/POLD1/CD  |
| 644 tags=18%, 5730/100/GO_BP   | PTGDS/ADA/ADORA1                         |
| 1379 tags=27%, 10580/985GO_BP  | SORBS1/EPM2AIP1/PDK2/STK1/SIRT1/C1QTNF3  |
| 1487 tags=42%, 122970/79GO_BP  | ACOT4/PANK3/MPC1/ACSS2/SULT1A1/PDK2/ELO  |
| 1487 tags=42%, 122970/79GO_BP  | ACOT4/PANK3/MPC1/ACSS2/SULT1A1/PDK2/ELO  |
| 1487 tags=42%, 122970/79GO_BP  | ACOT4/PANK3/MPC1/ACSS2/SULT1A1/PDK2/ELO  |
| 1464 tags=22%, 8864/153/GO_BP  | PER2/ADRB1/ADORA2A/EGFR/NPR1/ADRA2B/HTR  |
| 1426 tags=21%, 4035/5565GO_BP  | LRP1/PIGV/HERC3/PIGP/ANGPTL8/NPC1L1/PPM  |
| 1221 tags=20%, 57026/5467GO_BP | PDXP/CRLS1/OXT/RAPGEF2/SOD1/AQP8/FDX1/T  |
| 1464 tags=22%, 8864/153/GO_BP  | PER2/ADRB1/ADORA2A/EGFR/NPR1/ADRA2B/HTR  |
| 782 tags=27%, 7048/2247/GO_BP  | TGFBR2/FGF2/DUSP10/TFPI/CAPN3/SYTL4/SEL  |
| 1464 tags=22%, 8864/153/GO_BP  | PER2/ADRB1/ADORA2A/EGFR/NPR1/ADRA2B/HTR  |
| 1063 tags=22%, 1071/5020/GO_BP | CETP/OXT/AGTR1/SHH/CD36/PPARA/ACACB/APO  |
| 5859 tags=51%, 3159/6688/GO_BP | HMGAI1/SPI1/DNMT1/BRCA1/OTUB1/NOC2L/KDM1 |
| 3928 tags=34%, 27090/2717GO_BP | ST6GALNAC4/GLA/B4GALNT1/GAL3ST1/PRKCD/P  |
| 2225 tags=28%, 7040/5592GO_BP  | TGFB1/RCC2/ARHGAP4/PAK1/GNA12/CORO1C/IT  |
| 1442 tags=50%, 153/147/GO_BP   | ADRB1/ADRA1B/ADRA1A/ADRB2                |
| 767 tags=50%, 56954/280GO_BP   | NIT2/GOT1/GOT2/PCK1                      |
| 1251 tags=50%, 10786/656GO_BP  | SLC17A3/SLC17A1/SLC17A4/SLC17A2          |

|                                |                                         |
|--------------------------------|-----------------------------------------|
| 750 tags=38%, 2021/10013GO_BP  | ENDOG/HDAC6/RGN                         |
| 4629 tags=45%, 5315/80201GO_BP | PKM/HKDC1/ALDOA/IMPDH1/TREM2/ENO2/PFKP/ |
| 1794 tags=44%, 1215/5667CGO_BP | CMA1/SUCNR1/CTSG/ACE2/CES1/ENPEP/MME/RE |
| 943 tags=22%, 6647/10013GO_BP  | SOD1/HDAC6/ACOX2/RGN                    |
| 4306 tags=56%, 8878/3312/GO_BP | SQSTM1/HSPA8/SNF8/NCLN/TAPBP            |
| 4205 tags=83%, 644150/849GO_BP | WIPF3/TIGD5/WIPF1/WAS/WIPF2             |
| 1236 tags=50%, 56833/6929GO_BP | SLAMF8/TCF3/PRKDC                       |
| 4205 tags=83%, 644150/849GO_BP | WIPF3/TIGD5/WIPF1/WAS/WIPF2             |
| 178 tags=33%, 54209/1075GO_BP  | TREM2/CTSC                              |
| 4914 tags=33%, 6696/2539/GO_BP | SPP1/G6PD/SPHK1/SFN/S100A9/AGR2/PHLDA2/ |
| 6474 tags=45%, 6690/4318/GO_BP | SPINK1/MMP9/UCHL1/PYCARD/RGS2/FOXM1/HOM |
| 3727 tags=47%, 7305/1536/GO_BP | TYROBP/CYBB/HSPB1/SYK/MAPKAPK2/APP/CLEC |
| 1336 tags=50%, 8170/364/3GO_BP | SLC14A2/AQP7/AQP9                       |
| 30 tags=33%, 135/6580 GO_BP    | ADORA2A/SLC22A1                         |
| 4952 tags=49%, 54913/9156GO_BP | RPP25/EXO1/BOP1/RNASEH2A/FEN1/RNASE1/TS |
| 1295 tags=71%, 6817/5447/GO_BP | SULT1A1/POR/PPARGC1A/SULT1B1/CYP1A1     |
| 603 tags=71%, 1149/11488GO_BP  | CIDEA/OSBPL11/FITM1/APOC4/PLIN5         |
| 5482 tags=47%, 3984/6659/GO_BP | LIMK1/SOX4/TSP0/MAD2L1/MAD2L2/ISG15/SVB |
| 3256 tags=50%, 4133/23255GO_BP | MAP2/MTCL1/DYNLL1/DNAL4/NDE1            |
| 4207 tags=45%, 899/22994/GO_BP | CCNF/CEP131/NUP62/CHMP4B/STIL/NPM1/CHMP |
| 2149 tags=44%, 9187/2779/GO_BP | SLC24A1/GNAT1/HMGCS1/CAT                |
| 591 tags=44%, 344/338328GO_BP  | APOC2/GPIHBP1/APOH/APOA5                |
| 3785 tags=28%, 4318/3691/GO_BP | MMP9/ITGB4/ITGA3/MMP14/TXNRD1/DKK1/ITGB |
| 7508 tags=88%, 10112/5516GO_BP | KIF20A/CEP55/NUP62/CHMP4B/CHMP4C/CHMP3/ |
| 3509 tags=80%, 22943/1454GO_BP | DKK1/CSNK1E/CSNK1D/SFRP2                |
| 3723 tags=45%, 3958/5621/GO_BP | LGALS3/PRNP/EZR/PHPT1/THY1/PTPN6/LILRB4 |
| 3131 tags=56%, 6850/4050/GO_BP | SYK/LTB/MAST2/IRF1/CLEC7A               |
| 3131 tags=56%, 6850/4050/GO_BP | SYK/LTB/MAST2/IRF1/CLEC7A               |
| 2776 tags=57%, 6928/4017/GO_BP | HNF1B/LOXL2/ZNF706/PAX8                 |
| 3510 tags=75%, 54209/2177GO_BP | TREM2/FANCD2/SHARPIN/TNIP2/FANCA/TNFAIP |
| 2927 tags=43%, 2539/7086/GO_BP | G6PD/TKT/PGD/TALDO1/PGLS/RPIA           |
| 1079 tags=36%, 486/483/57GO_BP | FXYD2/ATP1B3/BAK1/ATP1A1/BAX            |
| 3509 tags=50%, 115908/575GO_BP | CTHRC1/PTK7/FZD1/DVL3/FZD2/DVL2/SFRP2   |
| 908 tags=33%, 54884/3157GO_BP  | RETSAT/HMGCS1/ALDH3A2/CYP2C18/APOE/APOC |
| 1226 tags=27%, 9446/57026GO_BP | GSTO1/PDXP/PCCA/MCCC2/PCCB/GCLC/PNPO/CY |
| 730 tags=14%, 2706/2852/GO_BP  | GJB2/GPER1/TXNIP/SRD5A1/ASS1/ESR1/RAMP3 |
| 1464 tags=22%, 8864/153/1GO_BP | PER2/ADRB1/ADORA2A/EGFR/NPR1/ADRA2B/HTR |
| 1084 tags=23%, 6446/5020/GO_BP | SGK1/OXT/WNK3/HAMP/ABCG8/ABCG5/APOA2/AP |
| 1239 tags=38%, 4496/4494/GO_BP | MT1H/MT1F/MAP1LC3A/MT1B/SOD1/ATP7B/MT2A |
| 944 tags=16%, 3155/3157/GO_BP  | HMGCL/HMGCS1/HNF4A/LIMS2/TGFBR3/PROX1/S |
| 7508 tags=65%, 55353/1759GO_BP | LAPTM4B/DNM1/SQSTM1/CHMP4B/VPS37C/CHMP4 |
| 2103 tags=22%, 4318/10013GO_BP | MMP9/CD24/FOXJ1/LIF/GLIS2/IQGAP1/PROM1/ |
| 4629 tags=45%, 5315/80201GO_BP | PKM/HKDC1/ALDOA/IMPDH1/TREM2/ENO2/PFKP/ |
| 6656 tags=50%, 4192/27242GO_BP | MDK/TNFRSF21/LGALS9/FOXJ1/LGALS3/TGFB1/ |
| 7249 tags=55%, 3976/7040/GO_BP | LIF/TGFB1/SPI1/MUC1/CHEK1/YEATS2/NAA40/ |
| 4970 tags=44%, 8877/8162CGO_BP | SPHK1/CDT1/CDCA5/DLGAP5/NUSAP1/TGFB1/AU |
| 6676 tags=57%, 3965/578/3GO_BP | LGALS9/BAK1/LGALS3/ADA/JAK3/CCL5/BAX/HI |
| 2956 tags=50%, 2539/80201GO_BP | G6PD/HKDC1/TKT/PGD/HK2/G6PC3/TALDO1/HK3 |
| 4914 tags=59%, 54512/1468GO_BP | EXOSC4/SLFN13/PELO/EXOSC5/DROSHA/EXOSC3 |
| 4405 tags=34%, 2810/5047/GO_BP | SFN/PAEP/TREM2/PYCARD/SOX4/MDK/MMP12/PO |
| 3838 tags=31%, 6696/4318/GO_BP | SPP1/MMP9/SPINT1/MMP7/APOA4/PLTP/SOX9/M |

|                                |                                          |
|--------------------------------|------------------------------------------|
| 2875 tags=60%, 115908/704GO_BP | CTHRC1/TGFB1/TGFB3                       |
| 5764 tags=73%, 5698/5690/GO_BP | PSMB9/PSMB2/PSMB4/PSMB8/PSMB10/PSMA5/PSI |
| 3510 tags=36%, 23643/574CGO_BP | LY96/S100A14/ITGAM/RIPK2/ITGB2/IRAK1/F2  |
| 81 tags=33%, 54209/291CGO_BP   | TREM2/PYCARD                             |
| 898 tags=50%, 1734/2184/GO_BP  | DIO2/FAH/MAOA/MAOB/DBH                   |
| 4900 tags=41%, 54209/100/GO_BP | TREM2/ADA/P2RX4/SYK/SLC9A1/P2RY6/CD3E/P  |
| 5182 tags=45%, 991/5347/2GO_BP | CDC20/PLK1/UBE2S/TRIB3/MAGEC2/RPS2/AXIN  |
| 1275 tags=24%, 23411/9971GO_BP | SIRT1/NR1H4/EGR1/ELOVL6/NFYB/ERLIN1/CYP  |
| 2974 tags=25%, 3965/84868GO_BP | LGALS9/HAVCR2/CORO1A/UNC13D/IL18/TUBB/S  |
| 5644 tags=57%, 960/972/45GO_BP | CD44/CD74/MUC1/ZNF385A/MIF/RNF34/BCL2L1  |
| 3913 tags=33%, 9212/578/5GO_BP | AURKB/BAK1/MAPK13/PBK/POLD1/CDC25A/CHEK  |
| 2128 tags=31%, 4321/10631GO_BP | MMP12/POSTN/SRC/MMP14/RCC2/CDKN2A/ADAM1  |
| 5142 tags=50%, 5984/5424/GO_BP | RFC4/POLD1/PCNA/RFC2/PARP1/RBX1/RPA2/CU  |
| 6834 tags=61%, 8767/5585/GO_BP | RIPK2/PKN1/SYK/WNT7B/BIRC7/MLKL/MAP3K6/1 |
| 3595 tags=35%, 29108/1869GO_BP | PYCARD/E2F1/CD44/CD74/MUC1/ZNF385A/BAX/1 |
| 4258 tags=29%, 6692/54209GO_BP | SPINT1/TREM2/BACE2/SOX4/MDK/TNFRSF21/SO  |
| 3955 tags=67%, 699/701/15GO_BP | BUB1/BUB1B/SGO2/PPP2R1A/RAD51C/MASTL     |
| 3955 tags=67%, 699/701/15GO_BP | BUB1/BUB1B/SGO2/PPP2R1A/RAD51C/MASTL     |
| 4096 tags=26%, 6690/2539/GO_BP | SPINK1/G6PD/CCNB1/PAEP/TRIP13/EPO/CABYR  |
| 873 tags=17%, 1627/22889GO_BP  | DBN1/CLSTN1/TYROBP/GPC4/STX3/SNAP25/HRA  |
| 6220 tags=55%, 79734/5147GO_BP | KCTD17/DCDC2/RABEP2/DYNLL1/TBC1D30/MAP4  |
| 6418 tags=60%, 8767/3148/GO_BP | RIPK2/HMGB2/IRF1/IRF3/IRF7/FLOT1/POLR3D  |
| 4469 tags=45%, 402/84722/GO_BP | ARL2/PSRC1/MAPRE1/PAK1/RAC1/RPS3/KATNB1  |
| 6686 tags=54%, 3965/8767/GO_BP | LGALS9/RIPK2/ADA/BATF/RELB/ELF4/SYK/IL1  |
| 8526 tags=71%, 3297/10219GO_BP | HSF1/PSMD14/PRKDC/MAD2L2/RBBP8/BRCA1/RE  |
| 1226 tags=25%, 3159/8318/GO_BP | HMGA1/CDC45/DNMT1/TRIM28/SIRT6/NAA40     |
| 120 tags=33%, 22999/18 GO_BP   | RIMS1/ABAT                               |
| 120 tags=33%, 22999/18 GO_BP   | RIMS1/ABAT                               |
| 3615 tags=43%, 6241/302/9GO_BP | RRM2/ANXA2/CD74/RCC1/S100A10/FARSB/CPSF  |
| 6656 tags=64%, 3965/1029/GO_BP | LGALS9/CDKN2A/CCL5/BAX/PRELID1/PDCD1/AD  |
| 1072 tags=29%, 6530/6581/GO_BP | SLC6A2/SLC22A3/DRD1/SLC22A1              |
| 4321 tags=31%, 3576/1277/GO_BP | CXCL8/COL1A1/POSTN/SULF1/CD44/SHCBP1/GP  |
| 6651 tags=48%, 5347/1601/GO_BP | PLK1/DAB2/PBK/TRIB3/AURKA/GIPC1/RNF19B/1 |
| 3928 tags=44%, 2583/9334/GO_BP | B4GALNT1/B4GALT5/NEU1/GM2A/CLN6/ST3GAL5  |
| 4326 tags=30%, 6692/7262/GO_BP | SPINT1/PHLDA2/CCNB1/KRT19/CCNB2/CTHRC1/  |
| 3928 tags=39%, 2717/2583/GO_BP | GLA/B4GALNT1/GAL3ST1/PRKCD/CTSA/BAX/B4G  |
| 3903 tags=83%, 7423/5880/GO_BP | VEGFB/RAC2/PGF/SWAP70/VEGFA              |
| 4077 tags=42%, 6790/22994GO_BP | AURKA/CEP131/NUP62/SPAG5/STIL/SNX10/CSN  |
| 3131 tags=47%, 7305/972/5GO_BP | TYROBP/CD74/PTAFR/SYK/IL1B/APP/CLEC7A    |
| 6999 tags=68%, 3965/8767/GO_BP | LGALS9/RIPK2/SYK/IL18/EBI3/CD3E/IRF1/RA  |
| 838 tags=100%, 4089/9573/GO_BP | SMAD4/GDF3/NODAL/SHH                     |
| 1396 tags=40%, 1829/5818/GO_BP | DSG2/NECTIN1/PKP3/PERP                   |
| 5475 tags=42%, 115908/419GO_BP | CTHRC1/MDK/SOX9/DAB2/DKK1/GPC3/TAX1BP3/1 |
| 5356 tags=42%, 4192/27242GO_BP | MDK/TNFRSF21/LGALS9/FOXJ1/TYRO3/LGALS3/  |
| 3568 tags=50%, 115908/579GO_BP | CTHRC1/PTK7/FZD1/DVL3/FZD2/DVL2/SFRP2/F  |
| 4062 tags=42%, 6659/6604/GO_BP | SOX4/SMARCD3/TBX2/NOTCH1/MESP1           |
| 4198 tags=50%, 7040/22949GO_BP | TGFB1/DKK1/YBX3/S100B/AKIRIN1/TWIST1     |
| 2750 tags=41%, 578/100/37GO_BP | BAK1/ADA/JAK3/BAX/HIF1A/ADAM8/DFFA       |
| 4734 tags=64%, 6714/1601/GO_BP | SRC/DAB2/MTMR2/EZR/MAP2/MSN/MAPK3/MAP2K  |
| 4629 tags=45%, 5315/80201GO_BP | PKM/HKDC1/ALDOA/IMPDH1/TREM2/ENO2/PFKP/  |
| 2063 tags=44%, 11015/6471GO_BP | KDELRL3/PDIA2/GPAA1/KDELRL1              |

|                                |                                                 |
|--------------------------------|-------------------------------------------------|
| 909 tags=25%, 5836/5236/GO_BP  | PYGL/PGM1/AGL/STBD1/TREH/IDNK/TKFC/PPP1         |
| 5456 tags=89%, 134/653361GO_BP | ADORA1/NCF1/TGFA/ADRA2A/ADAM17/EREG/EGF,        |
| 364 tags=22%, 890/7040 GO_BP   | CCNA2/TGFB1                                     |
| 2901 tags=56%, 1029/6352/GO_BP | CDKN2A/CCL5/IRF7/TCP1/CCR5                      |
| 5323 tags=40%, 10053/2342GO_CC | AP1M2/TMED3/B3GNT3/GCNT3/LPCAT1/RAP1GAP,        |
| 6546 tags=54%, 388610/332GO_CC | TRNP1/BIRC5/PLK1/CCNB1/AURKB/CENPA/TOP2,        |
| 4828 tags=44%, 10053/5701GO_CC | AP1M2/AKR1B10/LPCAT1/LAPTM4B/IMPDH1/IL4         |
| 6546 tags=50%, 388610/534GO_CC | TRNP1/PLK1/HMGA1/CENPA/E2F1/CDCA5/ASF1B,        |
| 6569 tags=53%, 4605/38861GO_CC | MYBL2/TRNP1/BIRC5/PLK1/CCNB1/KIF2C/CENPM,       |
| 6466 tags=55%, 768/2118/GO_CC  | CA9/ETV4/PITX1/CAPG/PYCARD/UBD/RGS2/UBE2,       |
| 4828 tags=44%, 10053/5701GO_CC | AP1M2/AKR1B10/LPCAT1/LAPTM4B/IMPDH1/IL4         |
| 5068 tags=47%, 10053/7988GO_CC | AP1M2/LPCAT1/LAPTM4B/ANXA2/ITM2C/SLC2A6,        |
| 4828 tags=43%, 10053/5701GO_CC | AP1M2/AKR1B10/LPCAT1/LAPTM4B/IMPDH1/IL4         |
| 6716 tags=56%, 991/5347/GO_CC  | CDC20/PLK1/CCNB1/KIF2C/CCNB2/CTAG2/AURKB,       |
| 6716 tags=51%, 991/5347/GO_CC  | CDC20/PLK1/CCNB1/KIF2C/CCNB2/CAPG/CTAG2,        |
| 4157 tags=45%, 991/332/GO_CC   | CDC20/BIRC5/PLK1/CCNB1/CAPG/KIF4A/AURKB,        |
| 5293 tags=45%, 6282/3159/GO_CC | S100A11/HMGA1/CYBA/LIMK1/ADGRE5/ANXA2/ITM2,     |
| 6840 tags=54%, 8877/5535GO_CC  | SPHK1/LAPTM4B/LY96/ANXA2/IKBKE/MMD/NDRG,        |
| 6039 tags=46%, 10053/2342GO_CC | AP1M2/TMED3/LPCAT1/CYBA/ADGRE5/MFSD10/FAM64,    |
| 4256 tags=35%, 226/3880/GO_CC  | ALDOA/KRT19/CAPG/CYBA/SLC2A1/CRYAB/DBN1,        |
| 7140 tags=52%, 6286/8162GO_CC  | S100P/CDT1/LIMK1/TKT/IKBKE/SH3BGRL3/MKI67,      |
| 5920 tags=43%, 23423/4922GO_CC | TMED3/NTS/NRSN2/KDELRL3/ATP13A2/DNM1/SYT15,     |
| 4553 tags=39%, 6286/5315/GO_CC | S100P/PKM/MMP9/S100A9/S100A11/CXCL1/ALDOA,      |
| 6039 tags=46%, 10053/2342GO_CC | AP1M2/TMED3/LPCAT1/CYBA/ADGRE5/MFSD10/FAM64,    |
| 6546 tags=53%, 4605/38861GO_CC | MYBL2/TRNP1/BIRC5/PLK1/CCNB1/KIF2C/CENPM,       |
| 5323 tags=40%, 10053/5666GO_CC | AP1M2/MUC13/TMED3/B3GNT3/GCNT3/LPCAT1/RAP1GAP,  |
| 5068 tags=47%, 10053/7988GO_CC | AP1M2/LPCAT1/LAPTM4B/IMPDH1/PYCARD/ANXA2/ITM2C, |
| 6840 tags=53%, 8877/5535GO_CC  | SPHK1/LAPTM4B/LY96/ANXA2/IKBKE/MMD/NDRG,        |
| 6546 tags=52%, 388610/534GO_CC | TRNP1/PLK1/CCNB1/AURKB/CENPA/E2F1/CDCA5,        |
| 6090 tags=47%, 6696/991/GO_CC  | SPP1/CDC20/PTGES/S100A6/CYBA/S100A4/PTGFR,      |
| 5293 tags=45%, 6282/3159/GO_CC | S100A11/HMGA1/CYBA/LIMK1/ADGRE5/ANXA2/ITM2,     |
| 5323 tags=41%, 10053/2342GO_CC | AP1M2/TMED3/B3GNT3/GCNT3/LPCAT1/RAP1GAP,        |
| 5068 tags=47%, 10053/7988GO_CC | AP1M2/LPCAT1/LAPTM4B/ANXA2/ITM2C/SLC2A6,        |
| 4337 tags=32%, 332/5347/GO_CC  | BIRC5/PLK1/KIF2C/ALDOA/KRT19/KIF4A/AURKB,       |
| 4337 tags=32%, 332/5347/GO_CC  | BIRC5/PLK1/KIF2C/ALDOA/KRT19/KIF4A/AURKB,       |
| 4553 tags=38%, 6286/5315/GO_CC | S100P/PKM/MMP9/S100A9/S100A11/CXCL1/ALDOA,      |
| 4337 tags=32%, 332/5347/GO_CC  | BIRC5/PLK1/KIF2C/ALDOA/KRT19/KIF4A/AURKB,       |
| 4115 tags=34%, 332/5347/GO_CC  | BIRC5/PLK1/KIF2C/KRT19/KIF4A/AURKB/TPX2,        |
| 7314 tags=64%, 7153/1168GO_CC  | TOP2A/RPL39L/LGALS3/RPP25/CKAP4/GAPDH/S100A11,  |
| 6546 tags=49%, 388610/105GO_CC | TRNP1/CENPA/E2F1/CDCA5/ASF1B/CHAF1B/RAD51,      |
| 4329 tags=39%, 332/5347/GO_CC  | BIRC5/PLK1/KIF2C/KIF4A/AURKB/TPX2/KIF20,        |
| 5293 tags=50%, 3159/1535/GO_CC | HMGA1/CYBA/LIMK1/ADGRE5/ICAM1/ARPC1B/FBXL1,     |
| 5293 tags=50%, 3159/1535/GO_CC | HMGA1/CYBA/LIMK1/ADGRE5/ICAM1/ARPC1B/FBXL1,     |
| 5293 tags=50%, 3159/1535/GO_CC | HMGA1/CYBA/LIMK1/ADGRE5/ICAM1/ARPC1B/FBXL1,     |
| 5998 tags=51%, 79888/1535GO_CC | LPCAT1/CYBA/ADGRE5/FCER1G/TMC6/ITPR3/LH2,       |
| 5592 tags=48%, 54997/6282GO_CC | TESC/S100A11/EPS8L3/S100A6/CAPG/LIMK1/ALDOA,    |
| 4115 tags=45%, 332/5347/GO_CC  | BIRC5/PLK1/CCNB1/KIF2C/CENPM/CDT1/AURKB,        |
| 5068 tags=46%, 10053/7988GO_CC | AP1M2/LPCAT1/LAPTM4B/ANXA2/ITM2C/SLC2A6,        |
| 6706 tags=66%, 116832/615GO_CC | RPL39L/RPL8/NROB1/RPL36A/MRPL17/RBM3/MRPL17,    |
| 6418 tags=64%, 29108/2026GO_CC | PYCARD/ENO2/PFKP/RRM2/ENO1/DBN1/RPL39L/ITM2,    |
| 3448 tags=42%, 332/5347/GO_CC  | BIRC5/PLK1/CCNB1/KIF2C/CENPM/CDT1/AURKB,        |



|                |                 |                                          |
|----------------|-----------------|------------------------------------------|
| 5430 tags=51%, | 54997/822/GO_CC | TESC/CAPG/LIMK1/DBN1/SH3BP1/RAC2/ENAH/C  |
| 3418 tags=43%, | 332/5347/EGO_CC | BIRC5/PLK1/CCNB1/KIF2C/CENPM/CDT1/AURKB  |
| 7236 tags=71%, | 3958/6628/GO_CC | LGALS3/SNRPB/SF3B4/ALYREF/RALY/SNRPD2/S  |
| 6706 tags=69%, | 116832/61EGO_CC | RPL39L/RPL8/RPL36A/MRPL17/RBM3/MRPS12/R  |
| 4258 tags=50%, | 5315/4318/GO_CC | PKM/MMP9/ALDOA/IMPDH1/FCER1G/LGALS3/GST  |
| 4605 tags=50%, | 3614/2910EGO_CC | IMPDH1/PYCARD/ANXA2/GLA/CTSC/ATP13A2/FA  |
| 4263 tags=47%, | 991/5347/EGO_CC | CDC20/PLK1/CCNB1/AURKB/TPX2/TACC3/CDC6/1 |
| 5255 tags=50%, | 54997/628EGO_CC | TESC/S100A11/EPS8L3/S100A6/CAPG/ANXA2/S  |
| 4313 tags=44%, | 332/5347/EGO_CC | BIRC5/PLK1/CAPG/KIF4A/AURKB/CDC48/KIF20  |
| 4072 tags=46%, | 4318/2919/GO_CC | MMP9/CXCL1/ALDOA/CYBA/FCER1G/TMC6/LGALS  |
| 3928 tags=44%, | 79888/3614GO_CC | LPCAT1/IMPDH1/PYCARD/ANXA2/GLA/CTSC/FAB  |
| 4115 tags=37%, | 332/11004/GO_CC | BIRC5/KIF2C/KIF4A/AURKB/CDC48/KIF20A/KI  |
| 3928 tags=44%, | 79888/3614GO_CC | LPCAT1/IMPDH1/PYCARD/ANXA2/GLA/CTSC/FAB  |
| 6436 tags=60%, | 9401/983/4GO_CC | RECQL4/CDK1/MCM2/MCM4/ORC1/RAD51/MCM6/F  |
| 6028 tags=58%, | 1535/4688/GO_CC | CYBA/NCF2/RAC2/CYBB/COR01A/ITGAV/RAB31/; |
| 3851 tags=49%, | 332/5347/EGO_CC | BIRC5/PLK1/CCNB1/KIF2C/CENPM/CDT1/AURKB  |
| 3671 tags=50%, | 5315/4318/GO_CC | PKM/MMP9/ALDOA/IMPDH1/GSTP1/COTL1/MVP/C  |
| 6644 tags=70%, | 116832/61EGO_CC | RPL39L/RPL8/RPL36A/MRPL17/RBM3/MRPL47/M  |
| 3343 tags=51%, | 332/5347/EGO_CC | BIRC5/PLK1/CCNB1/KIF2C/CENPM/CDT1/AURKB  |
| 3170 tags=41%, | 1627/6714/GO_CC | DBN1/SRC/RAC2/MISP/POF1B/PDLIM7/COR01A/1 |
| 3343 tags=51%, | 332/5347/EGO_CC | BIRC5/PLK1/CCNB1/KIF2C/CENPM/CDT1/CENPA  |
| 6062 tags=62%, | 983/4171/4GO_CC | CDK1/MCM2/MCM4/ORC1/RAD51/MCM6/FEN1/POL  |
| 4909 tags=47%, | 23423/1101GO_CC | TMED3/KDELR3/FOLR1/ZDHHC13/CD74/HLA-DRB  |
| 5928 tags=62%, | 6510/822/4GO_CC | SLC1A5/CAPG/ATP1B3/SLC2A1/ANXA2/MMP14/A  |
| 5928 tags=62%, | 6510/822/4GO_CC | SLC1A5/CAPG/ATP1B3/SLC2A1/ANXA2/MMP14/A  |
| 6217 tags=73%, | 116832/61EGO_CC | RPL39L/RPL8/RPL36A/RPS2/RPL17/RPLP2/RPS  |
| 4115 tags=49%, | 822/9212/EGO_CC | CAPG/AURKB/TPX2/TACC3/CDK1/KIF23/KIFC1/1 |
| 4535 tags=51%, | 2717/2340CGO_CC | GLA/ATP13A2/PPT1/CTSV/GPC4/GPC3/AGRN/SD  |
| 4245 tags=45%, | 5347/891/EGO_CC | PLK1/CCNB1/AURKB/CENPA/NUF2/NDC80/NEK2/1 |
| 7177 tags=77%, | 6628/1026EGO_CC | SNRPB/SF3B4/SNRPD2/SNRPD1/SNRPA1/SF3A2/1 |
| 3928 tags=49%, | 3614/2910EGO_CC | IMPDH1/PYCARD/ANXA2/GLA/CTSC/FABP5/PYGB  |
| 7222 tags=73%, | 6628/1018EGO_CC | SNRPB/ALYREF/RALY/SNRPD2/SNRPD1/SNRPA1/; |
| 3735 tags=35%, | 115908/127GO_CC | CTHRC1/COL1A1/COL1A2/COL9A2/C1QB/C1QC/C  |
| 6194 tags=72%, | 6628/6633/GO_CC | SNRPB/SNRPD2/SNRPD1/SNRPA1/SNRPA/SF3A2/1 |
| 4072 tags=51%, | 1535/2207/GO_CC | CYBA/FCER1G/TMC6/ITGAM/CYBB/ITGB2/SNAP2  |
| 5134 tags=66%, | 6628/6633/GO_CC | SNRPB/SNRPD2/SNRPD1/SNRPA1/SNRPA/SF3A2/1 |
| 5908 tags=72%, | 23246/2587GO_CC | BOP1/DCAF13/NOP56/MRT04/PES1/RRS1/RRP9/1 |
| 4936 tags=59%, | 8318/5984/GO_CC | CDC45/RFC4/TONSL/UHRF1/GINS2/MCM10/POLD  |
| 6127 tags=79%, | 116832/61EGO_CC | RPL39L/RPL8/RPL36A/RPL17/RPLP2/RPL10L/R  |
| 5134 tags=67%, | 6628/6633/GO_CC | SNRPB/SNRPD2/SNRPD1/SNRPA1/SNRPA/SF3A2/1 |
| 4298 tags=52%, | 332/5347/EGO_CC | BIRC5/PLK1/KIF4A/AURKB/CDK1/PRC1/KIF18B  |
| 2966 tags=40%, | 24137/2297GO_CC | KIF4A/TPX2/CDC48/KIF20A/CEP55/MICAL1/KI  |
| 2647 tags=36%, | 11004/241EGO_CC | KIF2C/KIF4A/KIF20A/KIF23/KIFC1/KIF18B/K  |
| 5650 tags=74%, | 6628/1026EGO_CC | SNRPB/SF3B4/SNRPD2/SNRPD1/SNRPA1/SF3A2/1 |
| 5650 tags=75%, | 6628/1026EGO_CC | SNRPB/SF3B4/SNRPD2/SNRPD1/SNRPA1/SF3A2/1 |
| 3935 tags=45%, | 891/9133/EGO_CC | CCNB1/CCNB2/CDK1/CKS2/CCNE1/CCNA2/CCNF/1 |
| 2918 tags=48%, | 5347/9212/GO_CC | PLK1/AURKB/CDC48/CDC6/KIF18B/RCC2/AURKA  |
| 2698 tags=60%, | 5347/891/EGO_CC | PLK1/CCNB1/AURKB/CENPA/NUF2/NDC80/BUB1/1 |
| 729 tags=53%,  | 5347/891/1GO_CC | PLK1/CCNB1/CENPA/NUF2/NDC80/BUB1/BUB1B/1 |
| 463 tags=62%,  | 5347/891/1GO_CC | PLK1/CCNB1/NDC80/BUB1/BUB1B/CENPF/SKA1/; |
| 1560 tags=46%, | 1535/4688/GO_CC | CYBA/NCF2/CYBB/NCF4/NCF1/DUOX2           |

|                                 |                                          |
|---------------------------------|------------------------------------------|
| 971 tags=58%, 4171/4173/GO_CC   | MCM2/MCM4/TONSL/MCM6/MCM7/MCM3/MCM5      |
| 1353 tags=58%, 6513/890/1GO_CC  | SLC2A1/CCNA2/CENPF/AURKA/EZH2/HSF1/CBX1  |
| 2124 tags=86%, 3108/972/3GO_CC  | HLA-DMA/CD74/HLA-DRB1/HLA-DQA1/HLA-DRA/  |
| 386 tags=80%, 332/9212/5GO_CC   | BIRC5/AURKB/CDCA8/AURKA                  |
| 6013 tags=45%, 8877/337/5GO_CC  | SPHK1/APOA4/LAPTM4B/CYBA/BACE2/LY96/ANX  |
| 7576 tags=54%, 5315/991/8GO_CC  | PKM/CDC20/CCNB1/KCTD17/CCNB2/PYCARD/PFK  |
| 5198 tags=48%, 2919/1535/GO_CC  | CXCL1/CYBA/LCN2/TMC6/PLAUR/CKAP4/ITGAM/  |
| 5998 tags=59%, 1535/11322GO_CC  | CYBA/TMC6/PLAUR/CKAP4/ITGAM/CYBB/ITGB2/  |
| 4831 tags=55%, 3159/1058/GO_CC  | HMGAI1/CENPA/CBX2/UHRF1/CDKN2A/CBX6/DNMT |
| 4473 tags=48%, 2207/3958/GO_CC  | FCER1G/LGALS3/ITGB2/TRPM2/ATAD3B/CD300A  |
| 6516 tags=90%, 6132/190/6GO_CC  | RPL8/NROB1/RPL36A/RPS21/RPL39/EIF3H/RPL  |
| 4203 tags=60%, 1058/29128GO_CC  | CENPA/UHRF1/EME1/TRIM28/SIRT6/CBX1/CBX3  |
| 3678 tags=62%, 6714/7171/GO_CC  | SRC/TPM4/FERMT3/ARHGEF2/ASAP1/FSCN1/SH3  |
| 5451 tags=76%, 6628/6633/GO_CC  | SNRPB/SNRPD2/SNRPD1/LSM4/EFTUD2/PPIH/SN  |
| 5451 tags=76%, 6628/6633/GO_CC  | SNRPB/SNRPD2/SNRPD1/LSM4/EFTUD2/PPIH/SN  |
| 6525 tags=57%, 24137/8482GO_CC  | KIF4A/LMNB2/CENPF/LMNB1/UHRF1/CENPW/PRK  |
| 692 tags=100%, 344/338/33GO_CC  | APOC2/APOB/APOA1/APOC3                   |
| 4856 tags=42%, 23423/2321GO_CC  | TMED3/SULF1/HID1/GAL3ST4/RAB34/TRAPPC4/  |
| 6357 tags=57%, 55353/302/GO_CC  | LAPTM4B/ANXA2/MMD/ATP13A2/HLA-DMA/HLA-D  |
| 6658 tags=72%, 55323/6132GO_CC  | LARP6/RPL8/NROB1/RPL36A/MCRS1/RPL10L/RP  |
| 6357 tags=65%, 1535/5880/GO_CC  | CYBA/RAC2/CYBB/CORO1A/RAB31/TAP1/RAB34/  |
| 1204 tags=100%, 733/727/73GO_CC | C8G/C5/C7/C8B/C8A/C6                     |
| 3406 tags=38%, 1277/4237/GO_CC  | COL1A1/MFAP2/FBLN1/COL1A2/COL4A5/LAMB1/  |
| 6885 tags=73%, 991/27338/GO_CC  | CDC20/UBE2S/BUB1B/CBX2/MAD2L2/PHC2/BRCA  |
| 4936 tags=56%, 8318/4796/GO_CC  | CDC45/TONSL/GINS2/MCM10/POLD1/MCM3/POLA  |
| 591 tags=100%, 344/55937/GO_CC  | APOC2/APOM/APOA2/PON1/HPR/APOA1/APOC3    |
| 4306 tags=73%, 972/3123/3GO_CC  | CD74/HLA-DRB1/HLA-DQA1/HLA-DRA/HLA-DQB1  |
| 4306 tags=73%, 972/3123/3GO_CC  | CD74/HLA-DRB1/HLA-DQA1/HLA-DRA/HLA-DQB1  |
| 3841 tags=75%, 54913/1052GO_CC  | RPP25/NOP56/DKC1/RRP9/FBL/SNRPF/NHP2/PO  |
| 2652 tags=67%, 3108/972/3GO_CC  | HLA-DMA/CD74/HLA-DRB1/HLA-DQA1/HLA-DRA/  |
| 4125 tags=81%, 26353/1096GO_CC  | HSPB8/STIP1/CCT5/CCT6A/CCT3/HSPA8/CCT2/  |
| 6546 tags=45%, 3159/5307/GO_CC  | HMGAI1/PITX1/SOX4/E2F1/SOX9/TEAD2/SPI1/T |
| 5574 tags=39%, 6286/768/5GO_CC  | S100P/CA9/TESC/EP8L3/MFSD10/REG1A/SRC/   |
| 1349 tags=64%, 8803/1743/GO_CC  | SUCLA2/DLST/BCKDHA/FH/DBT/SUCLG2/BCKDHB  |
| 1341 tags=69%, 3700/7078/GO_CC  | ITIH4/TIMP3/CDC37L1/RARRES2/CLEC3B/ITIH  |
| 905 tags=62%, 3949/348/3GO_CC   | LDLR/APOE/APOC2/SORL1/APOM/APOB/APOF/AP  |
| 692 tags=69%, 348/344/33GO_CC   | APOE/APOC2/APOB/APOC1/APOA2/APOH/APOA1/  |
| 804 tags=63%, 51449/348/GO_CC   | PCYOX1/APOE/APOC2/APOM/APOC4/APOB/APOC1  |
| 804 tags=63%, 51449/348/GO_CC   | PCYOX1/APOE/APOC2/APOM/APOC4/APOB/APOC1  |
| 946 tags=35%, 3040/348/3GO_CC   | HBA2/APOE/HBB/APOB/HP/APOA1/HPX          |
| 5595 tags=40%, 9123/9536/GO_CC  | SLC16A3/PTGES/S100A6/SMOX/PTGDS/TYRO3/T  |
| 5574 tags=51%, 54997/7957GO_CC  | TESC/EP8L3/SRC/PLEKH01/ARHGEF2/ITGAV/N   |
| 3406 tags=64%, 1277/1278/GO_CC  | COL1A1/COL1A2/COL3A1/COL5A1/COL5A2/LUM/  |
| 3406 tags=64%, 1277/1278/GO_CC  | COL1A1/COL1A2/COL3A1/COL5A1/COL5A2/LUM/  |
| 692 tags=73%, 1191/1071/GO_CC   | CLU/CETP/APOE/APOC2/APOM/APOC4/LIPC/SAA  |
| 4003 tags=44%, 1535/1410/GO_CC  | CYBA/CRYAB/FBLIM1/PDLIM7/MARCKS/TPM4/FH  |
| 5134 tags=73%, 6628/10262GO_CC  | SNRPB/SF3B4/SNRPD2/SNRPD1/YBX1/SNRPE/SN  |
| 4796 tags=42%, 10053/915/GO_CC  | AP1M2/CD3D/DAB2/FOLR1/FCHO1/CD74/RGS19/  |
| 2223 tags=25%, 23413/1081GO_CC  | NCS1/CPLX2/ADORA1/GIT1/ACTG1/ACTB        |
| 4771 tags=42%, 10053/2342GO_CC  | AP1M2/TMED3/KDEL3/CD3D/DAB2/FOLR1/FCHO   |
| 4594 tags=46%, 10053/915/GO_CC  | AP1M2/CD3D/DAB2/FCHO1/CD74/HLA-DRB1/HLA  |

|                |                 |                                          |
|----------------|-----------------|------------------------------------------|
| 1184 tags=64%, | 1191/1071/GO_CC | CLU/CETP/LDLR/PCYOX1/APOE/APOC2/SORL1/A  |
| 1184 tags=64%, | 1191/1071/GO_CC | CLU/CETP/LDLR/PCYOX1/APOE/APOC2/SORL1/A  |
| 3211 tags=71%, | 7203/10576GO_CC | CCT3/CCT2/CCT4/TCP1/CCT8                 |
| 4752 tags=62%, | 25879/1052GO_CC | DCAF13/NOP56/RRP9/FBL/EMG1/NOP58/UTP18/  |
| 6027 tags=43%, | 2348/972/1GO_CC | FOLR1/CD74/SCGN/SCAMP5/HLA-DRB1/SLC6A9/  |
| 1184 tags=61%, | 1191/1071/GO_CC | CLU/CETP/LDLR/PCYOX1/APOE/APOC2/SORL1/A  |
| 3750 tags=46%, | 11004/1469GO_CC | KIF2C/KIF18B/MISP/CLIP2/SPAG5/MAPRE1/AS  |
| 6468 tags=58%, | 10053/2342GO_CC | AP1M2/TMED3/DNM1/FCH01/BAIAP2L2/AP5Z1/C  |
| 6468 tags=58%, | 10053/2342GO_CC | AP1M2/TMED3/DNM1/FCH01/BAIAP2L2/AP5Z1/C  |
| 5134 tags=84%, | 6628/6633/GO_CC | SNRPB/SNRPD2/SNRPD1/SNRPA1/SF3A2/SNRPE/  |
| 1552 tags=83%, | 10809/1244GO_CC | STARD10/ABCC2/DPP4/ABCB11/ABCB4          |
| 1546 tags=60%, | 83594/1229GO_CC | NUDT12/ACOT4/NOS2/CRAT/ECH1/LONP2/HMGCL  |
| 1546 tags=60%, | 83594/1229GO_CC | NUDT12/ACOT4/NOS2/CRAT/ECH1/LONP2/HMGCL  |
| 7789 tags=68%, | 10537/5475GO_CC | UBD/FBLIM1/ORC6/DAB2/NFKBIE/TXNRD1/BOP1  |
| 3320 tags=16%, | 3880/6478GO_CC  | KRT19/MICAL1/KRT23/LMNB2/LMNB1/KRT17/KR  |
| 1227 tags=80%, | 8318/9837/GO_CC | CDC45/GINS1/GINS2/GINS4                  |
| 1942 tags=80%, | 4688/4689/GO_CC | NCF2/NCF4/NCF1/ADAM8                     |
| 4752 tags=66%, | 23246/2348GO_CC | BOP1/PES1/RRP7A/NOC2L/UTP18/FBXW9/RRP36  |
| 1349 tags=55%, | 1743/593/1GO_CC | DLST/BCKDHA/DBT/BCKDHB/DHTKD1/OGDHL      |
| 3698 tags=49%, | 3315/5698/GO_CC | HSPB1/PSMB9/PSMD14/PSMD2/PSMB2/PSME3/AD  |
| 4258 tags=51%, | 10112/5516GO_CC | KIF20A/CEP55/ECT2/RACGAP1/PKN1/PLCD3/RH  |
| 4003 tags=41%, | 1535/1627/GO_CC | CYBA/DBN1/FBLIM1/PDLIM7/TPM4/FHL3/ZYX/M  |
| 6494 tags=49%, | 3880/6513/GO_CC | KRT19/SLC2A1/ENO1/ANXA2/DBN1/MELK/ANLN/  |
| 6017 tags=48%, | 23423/1075GO_CC | TMED3/CTSC/KDEL3/STK26/FOLR1/ZDHHC13/C   |
| 4722 tags=42%, | 3880/6513/GO_CC | KRT19/SLC2A1/DBN1/ANLN/MISP/COR01A/FLNA  |
| 7539 tags=67%, | 4172/23649GO_CC | MCM3/POLA2/TAF6/POLR2G/CD3EAP/POLR3K/PO  |
| 6488 tags=63%, | 10053/972/GO_CC | AP1M2/CD74/SCAMP5/HLA-DRB1/RAB31/HLA-DQ  |
| 2256 tags=27%, | 1058/64151GO_CC | CENPA/NCAPG/NCAPD2/NCAPH/NCAPG2/SMC4/NC  |
| 1864 tags=41%, | 5826/25502GO_CC | ABCD4/MPV17L/ABCD3/PEX13/PEX12/PEX1/PEX  |
| 1864 tags=41%, | 5826/25502GO_CC | ABCD4/MPV17L/ABCD3/PEX13/PEX12/PEX1/PEX  |
| 3566 tags=29%, | 2539/6277/GO_CC | G6PD/S100A6/RGS2/RGS1/TGM3/GRAMD1A/SRC/  |
| 7539 tags=68%, | 4172/23649GO_CC | MCM3/POLA2/TAF6/POLR2G/CD3EAP/POLR3K/PO  |
| 4607 tags=50%, | 10053/2314GO_CC | AP1M2/FCH01/BAIAP2L2/CLTA/AP4M1/HIP1R/A  |
| 3380 tags=40%, | 3691/3675/GO_CC | ITGB4/ITGA3/ITGAM/ITGB2/ITGAV/ITGA5/ITG  |
| 6387 tags=58%, | 5888/10093GO_CC | RAD51/ARPC4/WDR76/MAD2L2/CBX1/RBBP8/ARPC |
| 6047 tags=48%, | 8877/1535/GO_CC | SPHK1/CYBA/NCF2/LPAR2/RAC2/CYBB/COR01A/  |
| 5574 tags=45%, | 54997/7957GO_CC | TESC/EPS8L3/REG1A/SRC/CD44/PLEKH01/KCNJ  |
| 6230 tags=50%, | 24137/1063GO_CC | KIF4A/CENPF/LMNB1/UHRF1/CENPW/PRKCD/CFL  |
| 7539 tags=67%, | 4172/23649GO_CC | MCM3/POLA2/TAF6/POLR2G/CD3EAP/POLR3K/PO  |
| 4258 tags=45%, | 10112/5516GO_CC | KIF20A/CEP55/ANLN/ECT2/RACGAP1/PKN1/PLC  |
| 3698 tags=48%, | 3315/5698/GO_CC | HSPB1/PSMB9/PSMD14/PSMD2/PSMB2/PSME3/AD  |
| 1135 tags=62%, | 2267/2244/GO_CC | FGL1/FGB/FGG/FGA/SERPINF2                |
| 1227 tags=34%, | 3479/1191/GO_CC | IGF1/CLU/F8/SERPINA1/ACTN2/PROS1/VWF/SE  |
| 6542 tags=52%, | 10053/2582GO_CC | AP1M2/BACE2/POSTN/PCSK1N/SNAP25/CD74/SC  |
| 4258 tags=47%, | 10112/5516GO_CC | KIF20A/CEP55/ANLN/ECT2/RACGAP1/PKN1/PLC  |
| 5718 tags=67%, | 23616/1115GO_CC | SH3BP1/COR01A/TRIP10/RAB31/LCP1/PIP5K1C  |
| 6592 tags=53%, | 1535/5880/GO_CC | CYBA/RAC2/CYBB/COR01A/FCH01/CD74/HLA-DR  |
| 3246 tags=44%, | 9296/533/2GO_CC | ATP6V1F/ATP6V0B/ATP6V0D2/ATP6V1C1/TCIRG  |
| 3001 tags=40%, | 4318/2919/GO_CC | MMP9/CXCL1/ALDOA/QSOX1/CSTB/LYZ/QPCT/TN  |
| 3406 tags=47%, | 1277/1278/GO_CC | COL1A1/COL1A2/COL4A5/COL3A1/COL5A1/COL5  |
| 7144 tags=65%, | 10397/5563GO_CC | NDRG1/SLC39A4/SCAMP5/PLEKHB2/LAMP5/ABHD  |

|                                  |                                          |
|----------------------------------|------------------------------------------|
| 4327 tags=73%, 1107/3065/GO_CC   | CHD3/HDAC1/HDAC2/MTA2/CHD4/RBBP4/RBBP7/  |
| 4327 tags=73%, 1107/3065/GO_CC   | CHD3/HDAC1/HDAC2/MTA2/CHD4/RBBP4/RBBP7/  |
| 2077 tags=58%, 7430/6404/GO_CC   | EZR/SELPLG/FLOT2/MSN/PIP5K1C/FLOT1/PSTP  |
| 2077 tags=58%, 7430/6404/GO_CC   | EZR/SELPLG/FLOT2/MSN/PIP5K1C/FLOT1/PSTP  |
| 4090 tags=67%, 9212/1469/GO_CC   | AURKB/KIF18B/RCC2/KIF18A/CENPE/CTTN/HNR1 |
| 6519 tags=51%, 10053/2342/GO_CC  | AP1M2/TMED3/CTSC/KDELR3/CD3D/DAB2/FOLR1  |
| 6229 tags=36%, 8877/9123/GO_CC   | SPHK1/SLC16A3/HOMER3/CRYAB/NTS/DBN1/KPN  |
| 3930 tags=42%, 6286/5315/GO_CC   | S100P/PKM/S100A9/S100A11/CXCL1/ALDOA/IM  |
| 3609 tags=67%, 6628/6633/GO_CC   | SNRBP/SNRPD2/SNRPD1/CD2BP2/SNRPE/TXNL4A  |
| 4582 tags=47%, 23149/972/GO_CC   | FCH01/CD74/HLA-DRB1/HLA-DQA1/HLA-DRA/HL  |
| 3581 tags=73%, 10095/1009/GO_CC  | ARPC1B/ARPC4/ARPC2/ARPC3/ARPC5L/ARPC1A/  |
| 3245 tags=88%, 8318/5165/GO_CC   | CDC45/GINS2/MCM10/GINS4/WDHD1/TIPIN/TIM  |
| 3750 tags=50%, 11004/1469/GO_CC  | KIF2C/KIF18B/CLIP2/SPAG5/MAPRE1/NCKAP5L  |
| 1349 tags=67%, 593/1629/GO_CC    | BCKDHA/DBT/SUCLG2/BCKDHB                 |
| 7889 tags=69%, 26147/6628/GO_CC  | PHF19/SNRPB/EZH2/SNRPD2/PRMT1/WDR4/SNRP  |
| 1361 tags=50%, 6403/3700/GO_CC   | SELP/ITIH4/TIMP3/CDC37L1/RARRES2/CLEC3B  |
| 7658 tags=55%, 3984/7086/GO_CC   | LIMK1/TKT/RMI2/CKAP4/CDC25C/DDX39A/SNRP  |
| 3980 tags=32%, 100133941/GO_CC   | CD24/ATP1B3/SLC2A1/ANXA2/ICAM1/SULF1/SR  |
| 4003 tags=43%, 1535/54751/GO_CC  | CYBA/FBLIM1/PDLIM7/TPM4/FHL3/ZYX/MICALL  |
| 4003 tags=43%, 1535/54751/GO_CC  | CYBA/FBLIM1/PDLIM7/TPM4/FHL3/ZYX/MICALL  |
| 3980 tags=32%, 100133941/GO_CC   | CD24/ATP1B3/SLC2A1/ANXA2/ICAM1/SULF1/SR  |
| 3439 tags=52%, 6286/768/GO_CC    | S100P/CA9/ITGAV/EZR/MSN/PROM1/SLC9A3R1/  |
| 1941 tags=55%, 3042/3045/GO_CC   | HBM/HBD/HBA1/HBA2/HBB/HP                 |
| 3211 tags=80%, 22948/908/GO_CC   | CCT5/CCT6A/CCT3/CCT2/CCT4/CCT7/TCP1/CCT  |
| 4547 tags=33%, 1759/5758/GO_CC   | DNM1/SYT13/PPT1/STX3/SNAP25/CDK16/SCAMP  |
| 7789 tags=65%, 10537/5475/GO_CC  | UBD/FBLIM1/ORC6/DAB2/NFKBIE/TXNRD1/TAX1  |
| 1372 tags=29%, 94121/6403/GO_CC  | SYTL4/SELP/IGF1/CLU/F8/SERPINA1/ACTN2/P  |
| 2917 tags=100%, 4172/2364/GO_CC  | MCM3/POLA2/PRIM1/POLA1/PRIM2             |
| 4486 tags=71%, 10213/5708/GO_CC  | PSMD14/PSMD2/ADRM1/PSMD13/PSMC4/PSMD10/  |
| 1104 tags=50%, 10203/9568/GO_CC  | CALCRL/GABBR2/RAMP3                      |
| 3380 tags=39%, 3691/3675/GO_CC   | ITGB4/ITGA3/ITGAM/ITGB2/ITGAV/ITGA5/ITG  |
| 4547 tags=33%, 1759/5538/GO_CC   | DNM1/PPT1/STX3/SNAP25/CDK16/SCAMP5/SLC6  |
| 3980 tags=31%, 100133941/GO_CC   | CD24/ATP1B3/SLC2A1/ANXA2/ICAM1/SULF1/SR  |
| 6423 tags=51%, 3880/6513/GO_CC   | KRT19/SLC2A1/ENO1/DBN1/ANLN/SH3BP1/SAPC  |
| 6511 tags=46%, 2539/6277/GO_CC   | G6PD/S100A6/RGS2/RGS1/TGM3/GRAMD1A/SRC/  |
| 3520 tags=57%, 9212/9787/GO_CC   | AURKB/DLGAP5/MISP/AURKA/NPM1/NDE1/EMD/N  |
| 6217 tags=75%, 6187/3921/GO_CC   | RPS2/RPSA/RPS5/RPS21/RPS3/RPS20/RPS19/R  |
| 5035 tags=41%, 23423/2839/GO_CC  | TMED3/HID1/GAL3ST4/RAB34/CANT1/B4GALT5/  |
| 6229 tags=38%, 7345/24137/GO_CC  | UCHL1/KIF4A/TPX2/NTS/DBN1/REG1A/MICAL1/  |
| 1104 tags=60%, 10203/1026/GO_CC  | CALCRL/RAMP1/RAMP3                       |
| 4288 tags=41%, 23423/7969/GO_CC  | TMED3/GAL3ST4/CANT1/B4GALT5/FUT4/CHPF2/  |
| 6596 tags=51%, 3159/6659/GO_CC   | HMGA1/SOX4/E2F1/SOX9/TEAD2/E2F5/TLE3/SO  |
| 8126 tags=72%, 63875/6183/GO_CC  | MRPL17/MRPS12/MRPL47/MRPL9/MRPL12/MRPS3  |
| 8126 tags=72%, 63875/6183/GO_CC  | MRPL17/MRPS12/MRPL47/MRPL9/MRPL12/MRPS3  |
| 3655 tags=46%, 3383/3958/GO_CC   | ICAM1/LGALS3/HAVCR2/CORO1A/EZR/CD53/CD3  |
| 955 tags=50%, 146909/126/GO_CC   | KIF18B/MISP/MAPRE1/KIF18A                |
| 5165 tags=100%, 51237/1052/GO_CC | MZB1/HYOU1/DNAJC10/PDIA6/HSPA5/PIIB/SDF  |
| 2857 tags=50%, 3912/3915/GO_CC   | LAMB1/LAMC1/LAMC2/LAMA5/LAMB3            |
| 3930 tags=41%, 6286/5315/GO_CC   | S100P/PKM/S100A9/S100A11/CXCL1/ALDOA/IM  |
| 5230 tags=34%, 7345/3880/GO_CC   | UCHL1/KRT19/KIF4A/SLC2A1/ENO1/ANXA2/DBN  |
| 6229 tags=40%, 4922/1627/GO_CC   | NTS/DBN1/REG1A/MICAL1/ITGA3/RGS10/NCS1/  |

|                 |                 |                                          |
|-----------------|-----------------|------------------------------------------|
| 6927 tags=47%,  | 991/79734/GO_CC | CDC20/KCTD17/UBE2S/BUB1B/CKS2/CCNF/CBX2, |
| 6466 tags=87%,  | 23246/5115GO_CC | BOP1/MRT04/PES1/RRS1/RRP1/NOC2L/ZNF593/  |
| 6437 tags=60%,  | 10053/2314GO_CC | AP1M2/FCH01/AP5Z1/AP4M1/HIP1R/AP3M2/AP2  |
| 1546 tags=51%,  | 196743/255GO_CC | PAOX/MPV17L/ABCD3/PEX13/NUDT12/PEX12/AC  |
| 1546 tags=51%,  | 196743/255GO_CC | PAOX/MPV17L/ABCD3/PEX13/NUDT12/PEX12/AC  |
| 8095 tags=57%,  | 1058/8318/GO_CC | CENPA/CDC45/GINS1/TONSL/GINS2/POLD1/MCM  |
| 3310 tags=78%,  | 6628/6633/GO_CC | SNRPB/SNRPD2/SNRPD1/SNRPE/SNRPF/SNRPG/P  |
| 6719 tags=77%,  | 23423/1101GO_CC | TMED3/KDEL3/PACS1/COPE/KDEL1/COPZ1/CO    |
| 4486 tags=67%,  | 10213/5708GO_CC | PSMD14/PSMD2/PSME3/ADRM1/PSMD13/PSMC4/P  |
| 5604 tags=92%,  | 6628/6633/GO_CC | SNRPB/SNRPD2/PRMT1/SNRPD1/WDR77/SNRPE/S  |
| 5511 tags=75%,  | 6628/23381GO_CC | SNRPB/SMG5/DKC1/SNRPE/NHP2/PTGES3/NAT10, |
| 4582 tags=58%,  | 23149/1211GO_CC | FCH01/CLTA/HIP1R/CLTB/AP2M1/AP2S1/EPS15  |
| 3930 tags=41%,  | 6286/5315/GO_CC | S100P/PKM/S100A9/S100A11/CXCL1/ALDOA/IM  |
| 5230 tags=48%,  | 3880/6513/GO_CC | KRT19/SLC2A1/DBN1/ANLN/MISP/CORO1A/CIB2, |
| 1138 tags=29%,  | 10652/4135GO_CC | YKT6/MAP2                                |
| 1036 tags=50%,  | 2022/721/7GO_CC | ENG/C4B/C8G/CLU/ACSM1/APCS/CP/HBA2/C1R/  |
| 5171 tags=60%,  | 1759/1488/GO_CC | DNM1/CTBP2/PACIN1/CACNA1D/NPHP4/ATP2A2   |
| 6885 tags=67%,  | 84733/2614GO_CC | CBX2/PHF19/CBX6/EZH2/PHC2/UBAP2L/HDAC2/  |
| 7063 tags=56%,  | 9961/23635GO_CC | MVP/NUP62/MX2/MAD2L1/RAN/RANGAP1/EIF5A2, |
| 3408 tags=57%,  | 9212/55145GO_CC | AURKB/CDCA8/OIP5/CBX1/INCENP/SCMH1/CBX5, |
| 7639 tags=76%,  | 6183/6187/GO_CC | MRPS12/RPS2/RPSA/RPS5/RPS21/MRPS34/RPS3, |
| 6296 tags=48%,  | 5315/891/9GO_CC | PKM/CCNB1/CCNB2/PYCARD/PFKP/CDK1/CKS2/C  |
| 4178 tags=31%,  | 1364/1192/GO_CC | CLDN4/CLIC1/TTYH3/CLIC3/SLC26A6/CLCN2/G  |
| 3924 tags=62%,  | 80331/3312GO_CC | DNAJC5/HSPA8/GAD1/SYT1/RAB3A             |
| 3924 tags=62%,  | 80331/3312GO_CC | DNAJC5/HSPA8/GAD1/SYT1/RAB3A             |
| 5915 tags=45%,  | 891/9133/2GO_CC | CCNB1/CCNB2/PYCARD/CDK1/CKS2/CCNE1/CCNA  |
| 5987 tags=58%,  | 11339/1735GO_CC | OIP5/DKC1/EFTUD2/FBL/NHP2/CDK2/LSM10/SN  |
| 3924 tags=42%,  | 80331/3312GO_CC | DNAJC5/HSPA8/GAD1/SYT1/RAB3A             |
| 5764 tags=79%,  | 5698/5690/GO_CC | PSMB9/PSMB2/PSMB4/PSMB8/PSMB10/PSMA5/PS  |
| 3069 tags=80%,  | 128869/94CGO_CC | PIGU/PIGS/GPAA1/PIGT                     |
| 6986 tags=53%,  | 1627/5967/GO_CC | DBN1/REG1A/ITGA3/GPRIN1/ARHGAP4/STX3/SN  |
| 3635 tags=86%,  | 7516/7517/GO_CC | XRCC2/XRCC3/SWI5/RAD51C/RAD51D/SFR1      |
| 4723 tags=100%, | 64151/9918GO_CC | NCAPG/NCAPD2/NCAPH/NCAPG2/SMC4/NCAPH2/N  |
| 6558 tags=54%,  | 2583/5768/GO_CC | B4GALNT1/QSOX1/CHST4/SLC39A13/SLC35B2/S  |
| 3246 tags=44%,  | 9296/533/2GO_CC | ATP6V1F/ATP6VOB/ATP6VOD2/ATP6V1C1/TCIRG  |
| 6437 tags=67%,  | 10053/2314GO_CC | AP1M2/FCH01/AP4M1/HIP1R/AP3M2/AP2M1/AP2  |
| 2779 tags=28%,  | 100133941/GO_CC | CD24/MELTF/FOLR1/GPC4/GPC3/PRNP/GPC1/FL  |
| 8126 tags=61%,  | 84419/569CGO_CC | C15orf48/NDUFA4L2/TOMM40/SLC25A6/MCUB/B  |
| 955 tags=36%,   | 146909/125GO_CC | KIF18B/MISP/MAPRE1/KIF18A                |
| 955 tags=36%,   | 146909/125GO_CC | KIF18B/MISP/MAPRE1/KIF18A                |
| 6365 tags=49%,  | 55353/302/GO_CC | LAPTM4B/ANXA2/SRC/MMD/ATP13A2/HLA-DMA/S  |
| 5339 tags=31%,  | 7345/1728/GO_CC | UCHL1/NQO1/PYCARD/CYBA/ENO2/TPX2/SNCG/H  |
| 6913 tags=58%,  | 79888/1097GO_CC | LPCAT1/CKAP4/SYNGR1/DNAJC5/DDOST/CD63/F  |
| 6423 tags=48%,  | 6277/5996/GO_CC | S100A6/RGS1/TGM3/GRAMD1A/SRC/SNAP25/CDK  |
| 4779 tags=46%,  | 7153/3838/GO_CC | TOP2A/KPNA2/NUP62/RAN/NUP210/VPS37C/GBP  |
| 4779 tags=46%,  | 7153/3838/GO_CC | TOP2A/KPNA2/NUP62/RAN/NUP210/VPS37C/GBP  |
| 1349 tags=60%,  | 593/1629/5GO_CC | BCKDHA/DBT/BCKDHB                        |
| 6986 tags=52%,  | 1627/5967/GO_CC | DBN1/REG1A/ITGA3/GPRIN1/ARHGAP4/STX3/SN  |
| 1726 tags=62%,  | 5984/79075GO_CC | RFC4/DSCC1/CHTF18/RFC2/DDX11             |
| 7171 tags=42%,  | 9123/9454/GO_CC | SLC16A3/HOMER3/CRYAB/DBN1/KPNA2/SRC/NCS  |
| 1582 tags=80%,  | 84823/4001GO_CC | LMNB2/LMNB1/NARF/LMNA                    |

|                                 |                                          |
|---------------------------------|------------------------------------------|
| 6851 tags=55%, 10397/5565GO_CC  | NDRG1/SLC39A4/TUBG1/SCAMP5/PLEKHB2/LAMP. |
| 5206 tags=68%, 960/3685/7GO_CC  | CD44/ITGAV/VASP/PLEK2/CFL1/SLC39A6/PLXN  |
| 1104 tags=50%, 10203/9568GO_CC  | CALCRL/GABBR2/RAMP1/RAMP3                |
| 873 tags=33%, 3838/23515GO_CC   | KPNA2/SCRIB                              |
| 5629 tags=55%, 79885/5156GO_CC  | HDAC11/HDAC7/BRMS1/CHD3/HDAC1/HDAC2/PHF  |
| 5764 tags=100%, 5698/5690/GO_CC | PSMB9/PSMB2/PSMB4/PSMB8/PSMB10/PSMB3/PS  |
| 2200 tags=50%, 9296/528/5GO_CC  | ATP6V1F/ATP6V1C1/ATP6AP1/ATP6V1H/ATP6V1  |
| 1546 tags=42%, 83594/5195GO_CC  | NUDT12/PEX12/ACOT4/PEX1/NOS2/PEX19/ZADH  |
| 7418 tags=54%, 10970/8878GO_CC  | CKAP4/SQSTM1/IGF2BP1/TUBB/MEX3A/HSF1/AP  |
| 1546 tags=42%, 83594/5195GO_CC  | NUDT12/PEX12/ACOT4/PEX1/NOS2/PEX19/ZADH  |
| 6700 tags=39%, 1627/3838/GO_CC  | DBN1/KPNA2/PFN2/SRC/NCS1/NDRG1/DNM1/CLS  |
| 5220 tags=82%, 84823/4001GO_CC  | LMNB2/LMNB1/NARF/PCNA/LMNA/EIF6/SUV39H1  |
| 7274 tags=68%, 3315/5698/GO_CC  | HSPB1/PSMB9/PSMD14/PSMD2/TAF6/PSMB2/PSM  |
| 3694 tags=62%, 2319/23605GO_CC  | FLOT2/CORO1C/FLOT1/CBL/CTNNA1            |
| 7171 tags=43%, 9123/9454/GO_CC  | SLC16A3/HOMER3/CRYAB/DBN1/SRC/NCS1/DNM1  |
| 1043 tags=38%, 302/4323/5GO_CC  | ANXA2/MMP14/CARMIL1                      |
| 1043 tags=38%, 302/4323/5GO_CC  | ANXA2/MMP14/CARMIL1                      |
| 3703 tags=62%, 1759/1211/GO_CC  | DNM1/CLTA/CLTB/RNF216/DNM2               |
| 4772 tags=51%, 8877/1601/GO_CC  | SPHK1/DAB2/LRP12/FCH01/LRP10/TFRC/CLTA/  |
| 7642 tags=81%, 4796/5424/GO_CC  | TONSL/POLD1/MCM3/POLA2/PCNA/PRIM1/DONSO  |
| 160 tags=12%, 226/1410/2GO_CC   | ALDOA/CRYAB/ENO1                         |
| 6127 tags=88%, 6628/6633/GO_CC  | SNRPB/SNRPD2/SNRPD1/SNRPE/SNRPF/GEMIN7/  |
| 3679 tags=35%, 27283/302/GO_CC  | TINAG/ANXA2/TIMP1/FBLN1/COL9A2/AGRN/COL  |
| 6273 tags=81%, 644150/849GO_CC  | WIPF3/TIGD5/WIPF1/HIP1R/CAPZA1/WAS/GMFG  |
| 6273 tags=81%, 644150/849GO_CC  | WIPF3/TIGD5/WIPF1/HIP1R/CAPZA1/WAS/GMFG  |
| 8040 tags=71%, 63875/5712GO_CC  | MRPL17/MRPL47/MRPL9/MRPL12/MRPL13/MRPL1  |
| 8040 tags=71%, 63875/5712GO_CC  | MRPL17/MRPL47/MRPL9/MRPL12/MRPL13/MRPL1  |
| 6558 tags=47%, 578/2583/2GO_CC  | BAK1/B4GALNT1/ATP13A2/CLSTN1/P2RX4/QSOX  |
| 1237 tags=27%, 486/483/47GO_CC  | FXYD2/ATP1B3/ATP1A1/SLC9A1               |
| 6567 tags=46%, 3159/8162GO_MF   | HMGA1/CDT1/CENPA/UBE2T/TOP2A/CDCA5/SOX9  |
| 7150 tags=50%, 9242/3159/GO_MF  | MSC/HMGA1/SSX1/SOX4/TRIP13/NFE2L3/CD3D/  |
| 5356 tags=35%, 5347/891/9GO_MF  | PLK1/CCNB1/CCNB2/LIMK1/AURKB/IKBKE/PKMY  |
| 6396 tags=45%, 1364/3159/GO_MF  | CLDN4/HMGA1/KRT19/CTHRC1/TUBA1C/TUBA4A/  |
| 5120 tags=38%, 100133941/GO_MF  | CD24/CCNB1/APOA4/CXCL1/RAP1GAP/PYCARD/R  |
| 4263 tags=34%, 6280/332/5GO_MF  | S100A9/BIRC5/PLK1/KIF2C/ALDOA/EPS8L3/TM  |
| 5950 tags=38%, 5315/8877/GO_MF  | PKM/SPHK1/HKDC1/PLK1/CCNB1/CCNB2/LIMK1/  |
| 5942 tags=44%, 486/11004/GO_MF  | FXYD2/KIF2C/RAP1GAP/KIF4A/RGS2/ATP1B3/K  |
| 5942 tags=44%, 486/11004/GO_MF  | FXYD2/KIF2C/RAP1GAP/KIF4A/RGS2/ATP1B3/K  |
| 5942 tags=44%, 486/11004/GO_MF  | FXYD2/KIF2C/RAP1GAP/KIF4A/RGS2/ATP1B3/K  |
| 5691 tags=44%, 486/11004/GO_MF  | FXYD2/KIF2C/RAP1GAP/KIF4A/RGS2/ATP1B3/K  |
| 6339 tags=50%, 2810/10015GO_MF  | SFN/CD24/PLK1/CCNB1/LAPTM4B/TREM2/CCNB2  |
| 6653 tags=53%, 2810/10015GO_MF  | SFN/CD24/PLK1/CCNB1/TREM2/CCNB2/TPX2/FO  |
| 4980 tags=41%, 2810/9232/GO_MF  | SFN/PTTG1/CAPG/PYCARD/CYBA/TEAD2/CABYR/  |
| 5120 tags=38%, 6690/2810/GO_MF  | SPINK1/SFN/CDC20/CD24/TESC/SPINT1/BIRC5  |
| 4630 tags=45%, 6696/6286/GO_MF  | SPP1/S100P/PKM/SFN/S100A11/ALDOA/CCNB2/  |
| 6523 tags=49%, 332/79574/GO_MF  | BIRC5/EPS8L3/RAP1GAP/ENO1/ANXA2/NCF2/RA  |
| 4256 tags=34%, 226/79574/GO_MF  | ALDOA/EPS8L3/TMSB10/CAPG/S100A4/MARCKSL  |
| 5974 tags=38%, 5347/3984/GO_MF  | PLK1/LIMK1/AURKB/IKBKE/PKMYT1/CDK1/MELK  |
| 5755 tags=45%, 486/11004/GO_MF  | FXYD2/KIF2C/KIF4A/ATP1B3/KIF20A/TOP2A/M  |
| 6625 tags=50%, 332/79574/GO_MF  | BIRC5/EPS8L3/RAP1GAP/ANXA2/NCF2/RAB3IL1  |
| 6625 tags=50%, 332/79574/GO_MF  | BIRC5/EPS8L3/RAP1GAP/ANXA2/NCF2/RAB3IL1  |

5120 tags=39%, 5909/5997/GO\_MF  
 4140 tags=37%, 6280/332/GO\_MF  
 4630 tags=48%, 6286/5315/GO\_MF  
 6290 tags=52%, 5909/5997/GO\_MF  
 4824 tags=35%, 6364/2919/GO\_MF  
 6005 tags=45%, 5909/5997/GO\_MF  
 5113 tags=39%, 5909/5997/GO\_MF  
 2906 tags=23%, 6696/6364/GO\_MF  
 4115 tags=36%, 6280/332/GO\_MF  
 6433 tags=54%, 3159/7153/GO\_MF  
 4337 tags=39%, 822/1627/GO\_MF  
 6047 tags=50%, 79574/468GO\_MF  
 4900 tags=44%, 2810/1001GO\_MF  
 5301 tags=46%, 991/7153/GO\_MF  
 6579 tags=52%, 55723/553GO\_MF  
 6644 tags=73%, 116832/61GO\_MF  
 4527 tags=46%, 4171/8318/GO\_MF  
 5383 tags=49%, 8877/9641/GO\_MF  
 4915 tags=50%, 9232/1535/GO\_MF  
 5117 tags=50%, 1410/8208/GO\_MF  
 4394 tags=44%, 6696/3383/GO\_MF  
 2864 tags=31%, 11004/241GO\_MF  
 4899 tags=54%, 7153/4171/GO\_MF  
 2743 tags=38%, 6282/302/GO\_MF  
 2702 tags=58%, 6282/302/GO\_MF  
 3686 tags=82%, 81620/588GO\_MF  
 332 tags=27%, 486/483/GO\_MF  
 332 tags=27%, 486/483/GO\_MF  
 2272 tags=73%, 6286/6280/GO\_MF  
 805 tags=60%, 3710/1103GO\_MF  
 5982 tags=39%, 5315/8877/GO\_MF  
 6646 tags=51%, 10644/729GO\_MF  
 5383 tags=46%, 8877/9641/GO\_MF  
 5603 tags=44%, 9401/4171/GO\_MF  
 6342 tags=54%, 23246/662GO\_MF  
 4405 tags=46%, 9401/4171/GO\_MF  
 1827 tags=38%, 7053/2162/GO\_MF  
 2230 tags=38%, 6536/2063GO\_MF  
 1235 tags=50%, 4688/4689/GO\_MF  
 1585 tags=62%, 5621/1005GO\_MF  
 1116 tags=67%, 2717/3965/GO\_MF  
 1369 tags=83%, 6280/241GO\_MF  
 288 tags=40%, 2207/3958 GO\_MF  
 4900 tags=41%, 2810/1001GO\_MF  
 3642 tags=34%, 55353/302/GO\_MF  
 5960 tags=64%, 79574/468GO\_MF  
 2808 tags=58%, 990/4171GO\_MF  
 4405 tags=76%, 4171/5984/GO\_MF  
 4405 tags=76%, 4171/5984/GO\_MF  
 4039 tags=67%, 1047/972GO\_MF  
 4405 tags=76%, 4171/5984/GO\_MF  
 RAP1GAP/RGS2/ATP1B3/RGS1/SH3BP1/RGS10/D  
 S100A9/BIRC5/PLK1/KIF2C/ALDOA/KIF4A/RGS  
 S100P/PKM/SFN/S100A11/ALDOA/CCNB2/CAPG/  
 RAP1GAP/RGS2/TUBA1C/RGS1/TUBA4A/TUBA1B/  
 CCL20/CXCL1/PYCARD/CXCL6/CXCL8/EPO/CXCL  
 RAP1GAP/RGS2/RGS1/SH3BP1/RGS10/DEPDC1B/  
 RAP1GAP/RGS2/RGS1/SH3BP1/RGS10/DEPDC1B/  
 SPP1/CCL20/CXCL1/CXCL6/CXCL8/EPO/CXCL5/  
 S100A9/BIRC5/PLK1/KIF2C/KIF4A/KIF20A/CR  
 HMGA1/TOP2A/RECQL4/MCM2/CDC45/GINS1/MCM  
 CAPG/DBN1/ARPC1B/MICAL1/MISP/POF1B/CORO  
 EPS8L3/NCF2/ANLN/SH3BP1/ARHGEF16/ECT2/I  
 SFN/CD24/TESC/CCNB1/CCNB2/PKIB/EPO/CKS2  
 CDC20/TOP2A/NCF2/MKI67/SRC/DAB2/DNM1/CE  
 ASF1B/HJURP/MCM2/CKS2/CHAF1B/TONSL/CBX2  
 RPL39L/RPL8/RPL36A/MRPL17/MRPS12/RPS2/M  
 MCM2/CDC45/MCM4/RAD51/NEIL3/MCM6/MCM10/  
 SPHK1/IKBKE/REG1A/NEK2/LGALS3/EIF4EBP1/  
 PTTG1/CYBA/CABYR/SH3BP1/MICAL1/DNM1/ENA  
 CRYAB/CHAF1B/CLGN/CCT5/SERPINH1/TUBB4B/  
 SPP1/ICAM1/ITGB4/SRC/ITGA3/MMP14/GPNMB/  
 KIF2C/KIF4A/KIF20A/KIF23/KIFC1/KIF18B/K  
 TOP2A/MCM2/RFC4/RAD51/RAD54L/MCM6/DSCC1  
 S100A11/ANXA2/EPCAM/DSG2/CDC42EP1/PKP3/  
 S100A11/ANXA2/EPCAM/CDC42EP1/PKP3/BAIAP  
 CDT1/RAD51/FANCI/FANCD2/NABP2/ACD/PCNA/  
 FXYD2/ATP1B3/ATP1A1  
 FXYD2/ATP1B3/ATP1A1  
 S100P/S100A9/S100A4/S100A8/HMGB2/FPR1/S  
 ITPR3/ADAP1/ADAP2  
 PKM/SPHK1/HKDC1/PLK1/CCNB1/CCNB2/LIMK1/  
 IGF2BP2/TYMS/RBM38/IGF2BP1/CCT5/LARP6/E  
 SPHK1/IKBKE/CTSC/REG1A/NEK2/LGALS3/TPRN  
 RECQL4/MCM2/CDC45/GINS1/MCM4/RFC4/RAD51  
 BOP1/SNRPB/NME1/EZH2/YBX3/EIF5A2/SNRPD1  
 RECQL4/MCM2/CDC45/GINS1/MCM4/RFC4/RAD51  
 TGM3/F13A1/TGM2  
 SLC6A9/SLC36A1/SLC38A5  
 NCF2/NCF4/NCF1/SH3PXD2B  
 PRNP/SAE1/DNAJC5/STX1A/HSP90AB1  
 GLA/LGALS9/LGALS2/LGALS4  
 S100A9/ALOX5AP/STX3/S100A8/FABP3  
 FCER1G/LGALS3  
 SFN/CD24/TESC/CCNB1/CCNB2/PKIB/EPO/CKS2  
 LAPTM4B/ANXA2/PFN2/ATP13A2/PLEK/ADAP1/P  
 EPS8L3/NCF2/SH3BP1/RCC2/ARHGAP4/FLNA/PK  
 CDC6/MCM2/CDC45/MCM4/ORC6/ORC1/MCM6/MCM  
 MCM2/RFC4/RAD51/MCM6/DSCC1/MCM7/PIF1/MCI  
 MCM2/RFC4/RAD51/MCM6/DSCC1/MCM7/PIF1/MCI  
 CLGN/CD74/HSPB1/HSPA6/HSPA8/PDCL3/CCT2/  
 MCM2/RFC4/RAD51/MCM6/DSCC1/MCM7/PIF1/MCI

|                                |                                          |
|--------------------------------|------------------------------------------|
| 2197 tags=57%, 6282/6277/GO_MF | S100A11/S100A6/ANXA2/EZR/CACYBP/IQGAP1/  |
| 2283 tags=73%, 1627/5574GO_MF  | DBN1/ENAH/VASP/FMNL1/RHOQ/WIPF1/ACTG1/C  |
| 512 tags=80%, 51/30/33/GO_MF   | ACOX1/ACAA1/ACADL/ACOX2                  |
| 1036 tags=100%, 6296/5498GO_MF | ACSM3/ACSM5/ACSM2B/ACSM2A                |
| 333 tags=80%, 140679/654GO_MF  | SLC32A1/SLC6A13/SLC6A12/SLC6A1           |
| 392 tags=60%, 8993/929/GO_MF   | PGLYRP1/CD14/PGLYRP2                     |
| 2322 tags=57%, 2316/1004GO_MF  | FLNA/IPLL5/JCHAIN/FGR                    |
| 751 tags=80%, 6280/241/GO_MF   | S100A9/ALOX5AP/STX3/S100A8               |
| 110 tags=86%, 128/130/GO_MF    | ADH5/ADH6/ADH1A/ADH1C/ADH1B/ADH4         |
| 1575 tags=86%, 4548/1118GO_MF  | MTR/INMT/TPMT/MGMT/BHMT2/BHMT            |
| 439 tags=71%, 6578/1145GO_MF   | SLC02A1/SLC22A9/MFSD2A/SLC27A2/SLC27A5   |
| 785 tags=57%, 1583/6600GO_MF   | CYP11A1/CYP4F12/CYP4F2/CYP4A11           |
| 2743 tags=36%, 6282/302/GO_MF  | S100A11/ANXA2/EPCAM/DSG2/CDC42EP1/PKP3/  |
| 1148 tags=75%, 3032/3033/GO_MF | HADHB/HADH/HSD17B4/HSD17B8/CRYL1/EHHADH  |
| 220 tags=88%, 128/1378GO_MF    | ADH5/ADHFE1/ADH6/ADH1A/ADH1C/ADH1B/ADH4  |
| 457 tags=88%, 1551/6481GO_MF   | CYP3A7/CYP3A43/CYP1A1/CYP3A5/CYP1A2/CYP  |
| 333 tags=50%, 6540/6539/GO_MF  | SLC6A13/SLC6A12/SLC6A1/SLC10A1           |
| 333 tags=40%, 6540/6539/GO_MF  | SLC6A13/SLC6A12/SLC6A1/SLC10A1           |
| 1197 tags=82%, 27034/37/GO_MF  | ACAD8/ACADVL/ACAD11/ACADS/IVD/GCDH/ACAD  |
| 1911 tags=53%, 9401/4171/GO_MF | RECQL4/MCM2/CDC45/GINS1/MCM6/GINS2/MCM7  |
| 4405 tags=75%, 4171/5984/GO_MF | MCM2/RFC4/RAD51/MCM6/DSCC1/MCM7/PIF1/MC  |
| 4405 tags=75%, 4171/5984/GO_MF | MCM2/RFC4/RAD51/MCM6/DSCC1/MCM7/PIF1/MC  |
| 457 tags=77%, 1551/6481GO_MF   | CYP3A7/CYP3A43/XDH/ACOX2/CYP3A5/AOX1/CY  |
| 445 tags=31%, 116362/837GO_MF  | RBP7/RBP5/RBP4/ADH4                      |
| 1491 tags=69%, 199974/11GO_MF  | CYP4Z1/CYP2U1/CYP4X1/CYP2C18/CYP2A13/CY  |
| 4967 tags=33%, 5315/8877/GO_MF | PKM/SPHK1/HKDC1/PLK1/CCNB1/CCNB2/LIMK1/  |
| 6074 tags=46%, 7345/891/GO_MF  | UCHL1/CCNB1/LAPTM4B/UBE2T/IKBKE/SRC/TUB  |
| 4955 tags=40%, 6714/1601/GO_MF | SRC/DAB2/ARHGAP4/COL1A2/NCK2/PAG1/RUSC1  |
| 1963 tags=78%, 3872/3117/GO_MF | KRT17/HLA-DQA1/HLA-DRA/HLA-DQB1/HLA-DPA  |
| 1212 tags=60%, 128/8659/GO_MF  | ADH5/ALDH4A1/ALDH3A2/ALDH1B1/ALDH9A1/AL  |
| 717 tags=80%, 1562/1573/GO_MF  | CYP2C18/CYP2J2/CYP2A13/CYP4F12/CYP2A7/C  |
| 1036 tags=71%, 116285/80GO_MF  | ACSM1/ACSF2/ACSL6/ACSM3/ACSL5/ACSL1/SLC  |
| 1432 tags=50%, 4843/5516GO_MF  | NOS2/PNPO/DHODH/POR/IYD/HAO2/HAO1        |
| 1197 tags=55%, 37/91452/GO_MF  | ACADVL/ACBD5/HMGCL/PNPLA3/ACBD4/ECI2/GC  |
| 907 tags=45%, 8228/2212GO_MF   | PNPLA4/CES5A/PNPLA3/LIPG/CES1/CES4A/LIP  |
| 1148 tags=61%, 3032/2346GO_MF  | HADHB/GCAT/ACSM1/ACAA1/ACAA2/ACAT1/ACSM  |
| 1063 tags=56%, 1071/5476GO_MF  | CETP/GRAMD1C/APOE/STARD5/APOB/ABCG8/ABC  |
| 1063 tags=56%, 1071/5476GO_MF  | CETP/GRAMD1C/APOE/STARD5/APOB/ABCG8/ABC  |
| 717 tags=81%, 1562/1573/GO_MF  | CYP2C18/CYP2J2/CYP2A13/CYP4F12/CYP1A1/C  |
| 934 tags=56%, 338821/657GO_MF  | SLC01B7/SLC01A2/AKR1C4/SLC02B1/ABCB11/S  |
| 934 tags=50%, 338821/657GO_MF  | SLC01B7/SLC01A2/SLC02A1/SLC22A9/SLC02B1  |
| 290 tags=42%, 5959/130/GO_MF   | RDH5/ADH6/RDH16/HSD17B6/ADH1A/ADH1C/ADH  |
| 476 tags=53%, 116285/23GO_MF   | ACSM1/ACSL6/ACSM3/ACSL5/ACSL1/SLC27A2/A  |
| 972 tags=52%, 275/2805/GO_MF   | AMT/GOT1/AADAT/GOT2/GPT2/GPT/AGXT2/ABAT  |
| 972 tags=52%, 275/2805/GO_MF   | AMT/GOT1/AADAT/GOT2/GPT2/GPT/GATM/AGXT2  |
| 6821 tags=52%, 7345/5535GO_MF  | UCHL1/LAPTM4B/UBE2T/IKBKE/SRC/TUBA1B/TR  |
| 3671 tags=69%, 5315/3108/GO_MF | PKM/HLA-DMA/CD74/HLA-DRB1/HLA-DRA/HLA-DI |
| 1036 tags=54%, 55902/116GO_MF  | ACSS2/ACSM1/ACSF2/ACSS3/ACSL6/ACSM3/ACS  |
| 663 tags=33%, 6505/9962/GO_MF  | SLC1A1/SLC23A2/SLC13A3/SLC6A13/SLC1A2/S  |
| 917 tags=33%, 169355/84GO_MF   | IDO2/BBOX1/BCO2/TDO2/ADI1/HAAO/HGD/CDO1  |
| 6545 tags=72%, 1058/2912GO_MF  | CENPA/UHRF1/PHF19/RCC1/SMARCA4/ACTL6A/HI |



|                 |                 |                                          |
|-----------------|-----------------|------------------------------------------|
| 917 tags=32%,   | 169355/842GO_MF | ID02/BB0X1/BC02/TD02/ADI1/HAA0/HGD/CD01, |
| 1036 tags=50%,  | 55902/1162GO_MF | ACSS2/ACSM1/ACSF2/SUCLG2/ACSS3/ACSL6/AC  |
| 1362 tags=32%,  | 6256/733/2GO_MF | RXRA/C8G/LCN12/CYP26A1/RBP7/SERPINA5/RB  |
| 1040 tags=38%,  | 51170/3294GO_MF | HSD17B11/HSD17B2/HSD17B4/HSD17B8/AKR1C4, |
| 4127 tags=44%,  | 891/9133/1GO_MF | CCNB1/CCNB2/CKS2/CCNE1/CCNA2/CCNF/CDKN2, |
| 717 tags=55%,   | 1562/1551/GO_MF | CYP2C18/CYP3A7/CYP2J2/CYP2A13/CYP4F12/C  |
| 547 tags=34%,   | 1408/51/79GO_MF | CRY2/ACOX1/STEAP4/KMO/PRODH2/LDHD/XDH/A  |
| 2230 tags=42%,  | 6510/81539GO_MF | SLC1A5/SLC38A1/SLC7A11/SFXN3/SLC6A9/SLC  |
| 648 tags=43%,   | 51170/3294GO_MF | HSD17B11/HSD17B2/SRD5A1/HSD17B4/HSD17B8, |
| 3873 tags=58%,  | 9401/55247GO_MF | RECQL4/NEIL3/HMGB3/HMGB2/NROB1/RBBP8/XR  |
| 3727 tags=57%,  | 3685/2817/GO_MF | ITGAV/GPC1/FGFR4/RPS2/FGFR1/FGFR3/CXCL1: |
| 3142 tags=26%,  | 11004/2413GO_MF | KIF2C/KIF4A/KIF20A/KIF23/KIFC1/KIF18B/K  |
| 1213 tags=42%,  | 6280/23643GO_MF | S100A9/LY96/SYK/S100A8/UNC93B1           |
| 2996 tags=42%,  | 6364/2919/GO_MF | CCL20/CXCL1/CXCL6/CXCL8/CXCL5/TFF2/S100. |
| 1056 tags=80%,  | 2327/2329/GO_MF | FMO2/FMO4/FMO5/FMO3                      |
| 888 tags=80%,   | 63826/3034GO_MF | SRR/HAL/SDS/FTCD                         |
| 355 tags=60%,   | 26061/5552GO_MF | HACL1/DHTKD1/OGDHL                       |
| 3752 tags=40%,  | 9833/6714/GO_MF | MELK/SRC/RIPK2/PRKCD/SYK/HCK/JAK3/PKDCC, |
| 3797 tags=56%,  | 6714/8878/GO_MF | SRC/SQSTM1/SHCBP1/LAT2/SYK/NUP62/PAG1/S  |
| 6174 tags=49%,  | 84790/7277GO_MF | TUBA1C/TUBA4A/TUBA1B/RAC2/TUBA3C/DNM1/A  |
| 6174 tags=49%,  | 84790/7277GO_MF | TUBA1C/TUBA4A/TUBA1B/RAC2/TUBA3C/DNM1/A  |
| 785 tags=60%,   | 1583/1562/GO_MF | CYP11A1/CYP2C18/CYP17A1/CYP3A7/CYP2J2/C  |
| 4163 tags=35%,  | 55353/302/GO_MF | LAPTM4B/ANXA2/PFN2/ATP13A2/RACGAP1/PLEK  |
| 1149 tags=56%,  | 1595/2327/GO_MF | CYP51A1/FMO2/CYP4F11/CYP26A1/MSM01/KMO/. |
| 1036 tags=34%,  | 116285/802GO_MF | ACSM1/ACSF2/SUCLG2/ACSS3/ACSL6/ACSM3/AC  |
| 946 tags=42%,   | 3040/875/1GO_MF | HBA2/CBS/CYP2C18/CYP17A1/CYP26A1/HBB/TD  |
| 1148 tags=83%,  | 39/3032/3GO_MF  | ACAT2/HADHB/ACAA1/ACAA2/ACAT1            |
| 3757 tags=35%,  | 991/7153/3GO_MF | CDC20/TOP2A/KPNA2/MAGEA1/PKN1/SMG5/ANKR  |
| 1115 tags=51%,  | 23464/3067GO_MF | GCAT/HDC/DDC/PNPO/PYGL/THNSL2/GOT1/CBS/. |
| 1115 tags=51%,  | 23464/3067GO_MF | GCAT/HDC/DDC/PNPO/PYGL/THNSL2/GOT1/CBS/. |
| 2708 tags=36%,  | 7053/2162/GO_MF | TGM3/F13A1/QPCT/TGM2/QPCTL               |
| 1560 tags=50%,  | 1535/4688/GO_MF | CYBA/NCF2/CYBB/NCF1/DUOX2                |
| 146 tags=38%,   | 991/5347/2GO_MF | CDC20/PLK1/UBE2S                         |
| 1099 tags=34%,  | 3067/1644/GO_MF | HDC/DDC/HMGCL/MLYCD/MOCS1/GOT1/CYP17A1/  |
| 2927 tags=62%,  | 10007/7167GO_MF | GNPDA1/TPI1/GPI/GNPDA2/RPIA              |
| 1867 tags=36%,  | 9975/405/8GO_MF | NR1D2/ARNT/NR4A3/NR5A2/NR4A2/RXRA/NR3C1, |
| 1349 tags=44%,  | 593/128/86GO_MF | BCKDHA/ADH5/ALDH4A1/ALDH3A2/ALDH1B1/ALD  |
| 1371 tags=28%,  | 4881/8484/GO_MF | NPR1/GALR3/CALCRL/NPR2/EDNRB/RAMP1/VIPR  |
| 1867 tags=36%,  | 9975/405/8GO_MF | NR1D2/ARNT/NR4A3/NR5A2/NR4A2/RXRA/NR3C1, |
| 1072 tags=33%,  | 6530/6579/GO_MF | SLC6A2/SLC01A2/AQP7/SLC22A3/AKR1C4/SLC0: |
| 1599 tags=67%,  | 64946/7272GO_MF | CENPH/TTK/CENPE/SPDL1                    |
| 751 tags=67%,   | 6280/241/6GO_MF | S100A9/ALOX5AP/STX3/S100A8               |
| 3121 tags=83%,  | 10528/1095GO_MF | NOP56/CBX1/HSP90AB1/CBX3/PRDM4           |
| 1803 tags=80%,  | 59342/545GO_MF  | SCPEP1/CPVL/CTSA/CPD                     |
| 5214 tags=100%, | 338376/344GO_MF | IFNE/IFNA5/IFNA21/IFNW1/IFNA4/IFNK/IFNA: |
| 987 tags=42%,   | 4284/363/3GO_MF | MIP/AQP6/AQP8/AQP7/AQP9                  |
| 987 tags=45%,   | 4284/363/3GO_MF | MIP/AQP6/AQP8/AQP7/AQP9                  |
| 3903 tags=45%,  | 6696/302/3GO_MF | SPP1/ANXA2/ITGA3/LGALS3/LGALS1/AGRN/ITG. |
| 476 tags=38%,   | 23305/517GO_MF  | ACSL6/ACSL5/ACSL1/SLC27A2/SLC27A5        |
| 1072 tags=31%,  | 6530/6557/GO_MF | SLC6A2/SLC12A1/SLC22A3/SLC22A1           |
| 2031 tags=77%,  | 3283/3284/GO_MF | HSD3B1/HSD3B2/EBP/IDI1/ECI1/ECH1/EBPL/E  |

|                                 |                                         |
|---------------------------------|-----------------------------------------|
| 445 tags=38%, 733/116362GO_MF   | C8G/RBP7/RBP5/RBP4/ADH4                 |
| 1092 tags=52%, 338821/516GO_MF  | SLC01B7/MPC1/SLC16A1/SLC16A12/SLC16A13/ |
| 6174 tags=48%, 84790/7277GO_MF  | TUBA1C/TUBA4A/TUBA1B/RAC2/TUBA3C/DNM1/A |
| 6174 tags=48%, 84790/7277GO_MF  | TUBA1C/TUBA4A/TUBA1B/RAC2/TUBA3C/DNM1/A |
| 1297 tags=19%, 1145/3357/GO_MF  | CHRNE/HTR2B/CBS/BCHE/SLC6A13/CRHBP/CHRN |
| 4127 tags=52%, 6714/1944/GO_MF  | SRC/EFNA3/EFNA4/EFNA5/EFNB1/SHC1/LYN/CD |
| 1318 tags=39%, 1632/549/2GO_MF  | ECI1/AUH/FH/HADHB/TGDS/PCBD1/CA2/NAXD/A |
| 6322 tags=60%, 9401/55247GO_MF  | RECQL4/NEIL3/FEN1/POLD1/HMGB2/FANCG/RBB |
| 7012 tags=50%, 55353/302/GO_MF  | LAPTM4B/ANXA2/PFN2/ITPR3/ATP13A2/RACGAP |
| 3875 tags=73%, 8767/837/6GO_MF  | RIPK2/CASP4/CARD9/CARD10/CARD19/CARD11/ |
| 1919 tags=39%, 10424/9975GO_MF  | PGRMC2/NR1D2/NR4A3/NR5A2/NR4A2/RXRA/NR3 |
| 1689 tags=40%, 2644/23576GO_MF  | GCHFR/DDAH1/SESN1/NOS2/SESN3/DDC/GCLC/T |
| 1949 tags=50%, 27034/6389GO_MF  | ACAD8/SDHA/PTGR1/DPYD/PTGR2/SDHD/ZADH2/ |
| 1362 tags=43%, 6256/9971/GO_MF  | RXRA/NR1H4/ADH5/PCCA/LCN12/DBT/CYP4F11/ |
| 927 tags=36%, 3248/23411GO_MF   | HPGD/SIRT1/BDH2/ALDH1B1/SIRT5/NNT/HIBAD |
| 1199 tags=80%, 3141/5095/GO_MF  | HLCS/PCCA/ACACB/PC                      |
| 21 tags=17%, 9123 GO_MF         | SLC16A3                                 |
| 737 tags=52%, 1071/54762GO_MF   | CETP/GRAMD1C/APOE/STARD5/TTPA/MTTP/APOB |
| 3671 tags=50%, 5315/3108/GO_MF  | PKM/HLA-DMA/CD74/HLA-DRB1/HLA-DRA/HLA-D |
| 2652 tags=59%, 3123/3117/GO_MF  | HLA-DRB1/HLA-DQA1/TAP1/SLC7A5/HLA-DRA/H |
| 6174 tags=48%, 84790/7277GO_MF  | TUBA1C/TUBA4A/TUBA1B/RAC2/TUBA3C/DNM1/A |
| 6481 tags=50%, 6714/1601/GO_MF  | SRC/DAB2/ARHGAP4/COL1A2/NCK2/PAG1/RUSC1 |
| 3674 tags=56%, 891/9212/9GO_MF  | CCNB1/AURKB/CDK1/AURKA/PKN1/CHEK1/CDK2/ |
| 515 tags=40%, 8659/2110/GO_MF   | ALDH4A1/ETFDH/QDPR/SARDH/PRODH2/ALDH1L1 |
| 4191 tags=37%, 3880/8479GO_MF   | KRT19/TUBA1C/TUBA4A/ARPC1B/TUBA1B/TUBA3 |
| 972 tags=30%, 57016/231/GO_MF   | AKR1B10/AKR1B1/AKR1C3                   |
| 1362 tags=33%, 6256/733/2GO_MF  | RXRA/C8G/LCN12/CYP26A1/RBP7/SERPINA5/RB |
| 6206 tags=69%, 3872/972/6GO_MF  | KRT17/CD74/TAP1/TUBB/TUBB4B/PILRA/BCAP3 |
| 2935 tags=57%, 128869/873GO_MF  | PIGU/GPAA1/THY1/DPEP1                   |
| 1614 tags=75%, 1632/549/3GO_MF  | ECI1/AUH/HADHB/ECHS1/ECHDC2/EHHADH      |
| 717 tags=75%, 1562/1592/GO_MF   | CYP2C18/CYP26A1/CYP3A7/CYP3A5/CYP2C8/CY |
| 512 tags=62%, 55316/51/3GO_MF   | RSAD1/ACOX1/ACAA1/ACADL/ACOX2           |
| 4684 tags=43%, 7345/7153/GO_MF  | UCHL1/TOP2A/CKS2/SQSTM1/HSPB1/UBXN11/NU |
| 713 tags=40%, 788/6581/6GO_MF   | SLC25A20/SLC22A3/SLC22A1/SLC25A47       |
| 280 tags=45%, 5825/2168/GO_MF   | ABCD3/FABP1/SLC27A2/FABP4/SLC27A5       |
| 4075 tags=42%, 332/29108/GO_MF  | BIRC5/PYCARD/BIRC3/RPS6KA1/BEX3/TNFAIP8 |
| 4677 tags=53%, 332/1104/5GO_MF  | BIRC5/RCC1/RANGAP1/NUTF2/NXT1/XPO6/CSE1 |
| 1560 tags=40%, 1535/4688/GO_MF  | CYBA/NCF2/MICAL1/CYBB/NCF1/DUOX2        |
| 1251 tags=27%, 10786/6575GO_MF  | SLC17A3/SLC20A2/SLC6A2/SLC4A4/SLC12A1/S |
| 26 tags=27%, 2904/2731/GO_MF    | GRIN2B/GLDC/SRR/GNMT                    |
| 3039 tags=45%, 7040/10042GO_MF  | TGFB1/IGLL5/HLA-DRB1/HLA-DQA1/TAP1/SLC7 |
| 1148 tags=29%, 3032/23483GO_MF  | HADHB/TGDS/PCBD1/CA2/NEIL1/NAXD/ACO1/TH |
| 6676 tags=62%, 4050/7186/GO_MF  | LTB/TRAF2/TRAF5/TNFSF9/BEX3/EDA/NOL3/ST |
| 1212 tags=40%, 128/8659/2GO_MF  | ADH5/ALDH4A1/ALDH3A2/ALDH1B1/ALDH9A1/AL |
| 4900 tags=47%, 2810/54997GO_MF  | SFN/TESC/PKIB/TRIB3/CDKN2A/HSPB1/CDKN2D |
| 1026 tags=57%, 84105/5092GO_MF  | PCBD2/PCBD1/AGMO/PAH                    |
| 1063 tags=53%, 1071/54762GO_MF  | CETP/GRAMD1C/APOE/STARD5/APOB/ABCG8/ABC |
| 5363 tags=65%, 991/57761/GO_MF  | CDC20/TRIB3/FBX05/UBE2L3/CBX8/RPL23/RPS |
| 3727 tags=29%, 115908/127GO_MF  | CTHRC1/COL1A1/POSTN/MFAP2/FBLN1/COL1A2/ |
| 747 tags=48%, 9645/27034GO_MF   | MICAL2/ACAD8/SDHA/COQ6/TXNRD3/MICAL3/DP |
| 7782 tags=100%, 50840/5726GO_MF | TAS2R14/TAS2R38/TAS2R4/TAS2R20/TAS2R1/T |

|                                 |                                          |
|---------------------------------|------------------------------------------|
| 3727 tags=48%, 3675/3958/GO_MF  | ITGA3/LGALS3/LGALS1/AGRN/ADAM9/GPC1/RPS. |
| 330 tags=22%, 2395/5264/GO_MF   | FXN/PHYH/HAAO/TF/CD01                    |
| 3590 tags=67%, 23640/108CGO_MF  | HSPBP1/HSPH1/PFN1/BAG3/GRPEL2/BAG2       |
| 4843 tags=28%, 6696/6364/GO_MF  | SPP1/CCL20/CXCL1/CXCL6/MDK/CXCL8/EPO/CX  |
| 3384 tags=75%, 6628/6632/GO_MF  | SNRPB/SNRPD1/SNRPA/SNRPC/PRPF31/SNRPB2   |
| 663 tags=44%, 6505/6484GO_MF    | SLC1A1/SLC13A3/SLC1A2/SLC13A5            |
| 1072 tags=40%, 6530/6557/GO_MF  | SLC6A2/SLC12A1/SLC22A3/SLC22A1           |
| 8574 tags=100%, 29991/3177GO_MF | OBP2A/VN1R5/OR8D1/OR8B8/OBP2B/VN1R2/VN1  |
| 1806 tags=48%, 22949/1806GO_MF  | PTGR1/DPYD/PTGR2/ZADH2/DECR2/DECR1/BDH2  |
| 5629 tags=76%, 1058/1104/GO_MF  | CENPA/RCC1/SMARCA4/ACTL6A/HDAC1/HDAC2/H  |
| 2935 tags=44%, 332/330/61GO_MF  | BIRC5/BIRC3/RPS6KA1/TNFAIP8/NOL3/LEF1/M  |
| 5377 tags=56%, 83442/7296GO_MF  | SH3BGRL3/TXNRD1/PDIA2/GSR/PGK1/PTGES2/S  |
| 5814 tags=43%, 302/5866/GO_MF   | ANXA2/RAB3IL1/MICAL1/NDRG1/CHML/UNC13D/  |
| 737 tags=21%, 733/10613/GO_MF   | C8G/ERLIN1/CETP/GRAMD1C/APOE/STARD5/RBP  |
| 6718 tags=69%, 10551/8489GO_MF  | AGR2/LINGO1/AREG/ITGA5/TGFA/CNOT9/SHC1/  |
| 3177 tags=43%, 6509/2063GO_MF   | SLC1A4/SLC36A1/SLC36A4                   |
| 626 tags=20%, 710/5037/GO_MF    | SERPING1/PEBP1/SERPINF1/SERPINA10/SERPI  |
| 6174 tags=47%, 84790/7277GO_MF  | TUBA1C/TUBA4A/TUBA1B/RAC2/TUBA3C/DNM1/A  |
| 6174 tags=47%, 84790/7277GO_MF  | TUBA1C/TUBA4A/TUBA1B/RAC2/TUBA3C/DNM1/A  |
| 4684 tags=46%, 7345/7153/GO_MF  | UCHL1/TOP2A/CKS2/SQSTM1/HSPB1/UBXN11/NU  |
| 557 tags=67%, 1468/25351GO_MF   | SLC25A10/SLC25A30/SLC13A3/SLC13A5        |
| 886 tags=83%, 224/219/22GO_MF   | ALDH3A2/ALDH1B1/ALDH9A1/ALDH7A1/ALDH2    |
| 3752 tags=29%, 9833/7301/GO_MF  | MELK/TYRO3/SRC/TTK/RIPK2/EFNA3/PRKCD/EF  |
| 714 tags=32%, 4843/1666/GO_MF   | NOS2/DECR1/FMO2/NNT/CBR4/HIBADH/POR/SRD  |
| 496 tags=86%, 51327/6521GO_MF   | AHSP/SLC4A1/HBD/HBB/HP/HPR               |
| 2318 tags=80%, 3684/3689/GO_MF  | ITGAM/ITGB2/VSIG4/PHB                    |
| 1056 tags=48%, 2327/2602GO_MF   | FMO2/CYP4X1/PCBD1/CYP4F22/CYP4F11/CYP11  |
| 1349 tags=44%, 593/594/5GO_MF   | BCKDHA/BCKDHB/DHTKD1/OGDHL               |
| 5241 tags=34%, 4318/4316/GO_MF  | MMP9/MMP7/MMP12/MMP11/MMP14/ADAM9/ADAM1  |
| 1040 tags=40%, 51170/3294GO_MF  | HSD17B11/HSD17B2/HSD17B8/HSD17B6         |
| 6199 tags=53%, 23466/2321GO_MF  | CBX6/JMJD6/POLR2G/MCRS1/RBM3/PABPC1/DDX  |
| 6686 tags=47%, 3159/5307/GO_MF  | HMGAI1/PITX1/E2F1/SOX9/TEAD2/SRC/CCNE1/C |
| 3246 tags=55%, 9296/533/GO_MF   | ATP6V1F/ATP6V0B/ATP6V0D2/ATP6V1C1/TCIRG  |
| 3246 tags=55%, 9296/533/GO_MF   | ATP6V1F/ATP6V0B/ATP6V0D2/ATP6V1C1/TCIRG  |
| 6596 tags=47%, 3159/6659/GO_MF  | HMGAI1/SOX4/NFE2L3/CD3D/CCNE1/PKN1/SMAR  |
| 7646 tags=56%, 54913/915GO_MF   | RPP25/EXO1/RNASEH2A/DDX39A/FEN1/PIF1/RN  |
| 3069 tags=80%, 128869/94GO_MF   | PIGU/PIGS/GPAA1/PIGT                     |
| 1191 tags=50%, 94097/6484GO_MF  | SFXN5/SLC13A3/SLC13A5                    |
| 1191 tags=50%, 94097/6484GO_MF  | SFXN5/SLC13A3/SLC13A5                    |
| 471 tags=67%, 338328/44GO_MF    | GPIHBP1/PLIN5/APOB/APOA5                 |
| 713 tags=20%, 788/6581/GO_MF    | SLC25A20/SLC22A3/SLC25A42/SLC22A1/SLC25  |
| 692 tags=32%, 4035/1191/GO_MF   | LRP1/CLU/APOE/APOB/APOA2/APOA1/APOA5/AP  |
| 737 tags=24%, 54762/348/GO_MF   | GRAMD1C/APOE/GPER1/RORA/STARD5/SULT1E1/  |
| 499 tags=57%, 291/9962/GO_MF    | SLC25A4/SLC23A2/SLC28A1/AQP9             |
| 3984 tags=73%, 7186/7188/GO_MF  | TRAF2/TRAF5/RAC1/TRAF3/CDC42/ADRA2A/HAU  |
| 4088 tags=50%, 4050/7186/GO_MF  | LTB/TRAF2/TRAF5/TNFSF9/EDA/STAT1/TNFSF1  |
| 3478 tags=56%, 3149/3148/GO_MF  | HMGB3/HMGB2/XRCC2/XRCC3/BLM/MSH2/RAD51C  |
| 2906 tags=41%, 6364/2919/GO_MF  | CCL20/CXCL1/CXCL6/CXCL8/CXCL5/CKLF/CCL5  |
| 734 tags=29%, 5146/5094GO_MF    | PDE6C/PDE11A/PDE2A/CNGA1                 |
| 1407 tags=24%, 1956/4881/GO_MF  | EGFR/NPR1/NR3C1/CHRNE/GALR3/ABHD2/CALCR  |
| 442 tags=18%, 7345/8015GO_MF    | UCHL1/ASRGL1                             |

|                                   |                                          |
|-----------------------------------|------------------------------------------|
| 1072 tags=23%, 6530/6505/GO_MF    | SLC6A2/SLC1A1/SLC6A13/SLC1A2/SLC6A12/SLC |
| 10303 tags=100%, 54429/9035/GO_MF | TAS2R5/PKD2L1/TAS2R14/TAS2R38/TAS2R4/TAS |
| 1197 tags=46%, 37/91452/GO_MF     | ACADVL/ACBD5/HMGCL/OXER1/PNPLA3/ACBD4/EP |
| 2511 tags=80%, 2264/2260/GO_MF    | FGFR4/FGFR1/FGFR3/FGFR2                  |
| 508 tags=40%, 445/1828/GO_MF      | ASS1/DSG1/EPHX2/ALB                      |
| 1115 tags=80%, 39/23464/GO_MF     | ACAT2/GCAT/ACAA2/ACAT1                   |
| 29 tags=40%, 132112/835/GO_MF     | RTP1/RTP3                                |
| 3332 tags=37%, 486/483/GO_MF      | FXVD2/ATP1B3/ANXA5/ATP13A2/ATP1A1/ATP6V  |
| 3332 tags=37%, 486/483/GO_MF      | FXVD2/ATP1B3/ANXA5/ATP13A2/ATP1A1/ATP6V  |
| 2108 tags=67%, 6628/6632/GO_MF    | SNRBP/SNRPD1/SNRPA/SNRPC                 |
| 737 tags=29%, 54762/348/GO_MF     | GRAMD1C/APOE/GLTPD2/STARD5/TMEM30B/ABCA  |
| 737 tags=32%, 1071/54762/GO_MF    | CETP/GRAMD1C/APOE/STARD5/APOB/ABCG8/ABCA |
| 1199 tags=21%, 5095/64087/GO_MF   | PCCA/MCCC2/ACSM1/PCCB/GCLC/ACSF2/ACACB/  |
| 1229 tags=35%, 348751/735/GO_MF   | FTCDNL1/C8G/PCCA/GCAT/HDC/DDC/PNPO/PYGL  |
| 1041 tags=35%, 260293/125/GO_MF   | CYP4X1/CYP4F22/HBA2/CYP4F11/FLVCR2/IDO2  |
| 1177 tags=24%, 54414/1105/GO_MF   | SIAE/ABHD2/CA2/CES5A/FAAH/ACOT1/PNPLA7/  |
| 591 tags=38%, 344/341/GO_MF       | APOC2/APOC1/APOA2/ANGPTL3/APOA1/APOC3    |
| 3008 tags=33%, 4318/4321/GO_MF    | MMP9/MMP12/ITGA3/CD44/ADAM9/DDR1/SERPIN  |
| 3664 tags=35%, 1277/1278/GO_MF    | COL1A1/COL1A2/COL9A2/COL4A5/COL16A1/COL  |
| 1072 tags=27%, 6006/51455/GO_MF   | RHCE/RHCG/SLC6A2/SLC25A20/SLC22A3/RHBG/  |
| 4158 tags=58%, 5360/23405/GO_MF   | PLTP/ATP13A2/NRGN/MICALL1/PITPNM1/UQCC3  |
| 3911 tags=29%, 6364/7345/GO_MF    | CCL20/UCLH1/CXCL1/CTHRC1/CXCL6/CXCL8/HO  |
| 7420 tags=51%, 9242/6756/GO_MF    | MSC/SSX1/TRIB3/TONSL/RELB/EZH2/HDAC7/TL  |
| 4638 tags=45%, 983/890/GO_MF      | CDK1/CCNA2/CDK16/CDK4/CDK2/CDK5/CDK18/C  |
| 8299 tags=100%, 79339/26210/GO_MF | OR51B4/OR2B6/OR1F1/OR2C3/OR51E2/OR7A5/O  |
| 691 tags=26%, 84869/11110/GO_MF   | CBR4/HIBADH/HADH/HSD17B2/HSD17B4/HSD17B  |
| 1589 tags=50%, 10331/8405/GO_MF   | B3GNT3/B3GNT5/B3GNT9/B3GNT7              |
| 1228 tags=46%, 1468/83735/GO_MF   | SLC25A10/SLC25A18/SLC25A13/SLC25A30/SLC  |
| 2925 tags=40%, 23636/10250/GO_MF  | NUP62/NUTF2/UPF3B/NUP93/NUP205/NDC1/NUP  |
| 1251 tags=21%, 10786/6575/GO_MF   | SLC17A3/SLC20A2/SLC6A2/SLC2A9/SLC4A4/SL  |
| 5694 tags=70%, 116372/4050/GO_MF  | LYPD1/LY6E/LYPD6B/CDK5/FNTA/LY6H/LYPD6   |
| 5694 tags=70%, 116372/4050/GO_MF  | LYPD1/LY6E/LYPD6B/CDK5/FNTA/LY6H/LYPD6   |
| 3359 tags=21%, 6696/6364/GO_MF    | SPP1/CCL20/CXCL1/CXCL6/MDK/CXCL8/EP0/CX  |
| 2577 tags=38%, 10331/79750/GO_MF  | B3GNT3/COLGALT1/B4GALT5/B3GNT5/B3GNT9/B  |
| 691 tags=26%, 84869/11110/GO_MF   | CBR4/HIBADH/HADH/HSD17B2/HSD17B4/HSD17B  |
| 1041 tags=33%, 260293/1250/GO_MF  | CYP4X1/CYP4F22/HBA2/CYP4F11/FLVCR2/IDO2  |
| 593 tags=40%, 3691/3685 GO_MF     | ITGB4/ITGAV                              |
| 5104 tags=62%, 302/23413/GO_MF    | ANXA2/NCS1/CDK5/CACNA1D/CNR1             |
| 1036 tags=83%, 116285/6250/GO_MF  | ACSM1/ACSM3/ACSM5/ACSM2B/ACSM2A          |
| 5255 tags=40%, 486/483/GO_MF      | FXVD2/ATP1B3/TOP2A/MCM2/ANXA5/ATP13A2/R  |
| 1903 tags=33%, 114569/8370/GO_MF  | MAL2/MARVELD1/PLLP                       |
| 3323 tags=56%, 80119/48310/GO_MF  | PIF1/NME2/DDX11/BLM/LONP1                |
| 1421 tags=24%, 6566/154050/GO_MF  | SLC16A1/SLC2A12/SLC38A2/SLC17A3/SLC25A1  |
| 3148 tags=60%, 1122/106350/GO_MF  | CHML/RGS14/GPSM1/GDI1/GPSM2/ARHGDIB/ITG  |
| 1228 tags=27%, 83733/10850/GO_MF  | SLC25A18/SLC26A1/ABCC2/SLC25A13/SLC19A2  |
| 737 tags=24%, 10613/10710/GO_MF   | ERLIN1/CETP/GRAMD1C/APOE/RORA/STARD5/SC  |
| 6337 tags=71%, 6628/233810/GO_MF  | SNRBP/SMG5/DKC1/NHP2/WRAP53/NOP10/GAR1/  |
| 4582 tags=46%, 1601/575850/GO_MF  | DAB2/SYT13/DNAJC6/CLTA/SYT8/BIN1/GPR107  |
| 6206 tags=81%, 6890/203050/GO_MF  | TAP1/TUBB/TUBB4B/PILRA/BCAP31/CD8A/VCP/  |
| 1251 tags=50%, 10786/65650/GO_MF  | SLC17A3/SLC17A1/SLC17A4/SLC17A2          |
| 3233 tags=67%, 9641/3654/GO_MF    | IKBKE/IRAK1/MAP3K14/PPP4C                |

|                 |                 |                                          |
|-----------------|-----------------|------------------------------------------|
| 1885 tags=50%,  | 3872/972/5GO_MF | KRT17/CD74/LAG3                          |
| 424 tags=17%,   | 1109/22977GO_MF | AKR1C4/AKR7A3/AKR1D1/ADH4                |
| 1045 tags=21%,  | 51279/8375GO_MF | C1RL/LONP2/C1R/C2/LPAL2/C1S/DPP4/CFI/F10 |
| 5194 tags=64%,  | 54503/2544GO_MF | ZDHC13/SLC41A1/TUSC3/CNNM4/MMGT1/NIPAL   |
| 5383 tags=58%,  | 8877/1978/GO_MF | SPHK1/EIF4EBP1/SMG5/STAT1/PPME1/STRN4/C  |
| 4701 tags=54%,  | 5315/4199/GO_MF | PKM/ME1/ATP1A1/ABCD1/TAP1/PGK1/RUVBL1/C  |
| 1226 tags=33%,  | 9446/4257/GO_MF | GSTO1/MGST1/MGST2/GSTM5/GSTZ1/GSTA2/GST  |
| 389 tags=67%,   | 2878/1734/GO_MF | GPX3/DIO2/DIO1/SELENBP1                  |
| 4127 tags=33%,  | 8878/1741/GO_MF | SQSTM1/DLG3/SCRIB/FLOT2/FLOT1/CACNG4/FU  |
| 957 tags=42%,   | 128/1629/5GO_MF | ADH5/DBT/CYP4F11/OXER1/PPARA/HNF4A/ACOX  |
| 1041 tags=31%,  | 260293/126GO_MF | CYP4X1/CYP4F22/HBA2/CYP4F11/FDX1/CYP11A  |
| 1130 tags=50%,  | 122970/555GO_MF | ACOT4/ACOT13/HIBCH/ACOT1/ACOT2/NUDT7/AC  |
| 3648 tags=48%,  | 128869/875GO_MF | PIGU/GPAA1/MANF/GLTP/THY1/LYN/DPEP1/CLI  |
| 5764 tags=79%,  | 5698/5690/GO_MF | PSMB9/PSMB2/PSMB4/PSMB8/PSMB10/PSMA5/PS  |
| 5764 tags=79%,  | 5698/5690/GO_MF | PSMB9/PSMB2/PSMB4/PSMB8/PSMB10/PSMA5/PS  |
| 7292 tags=46%,  | 9242/3159/GO_MF | MSC/HMGA1/SOX9/SPI1/RELB/NPAS2/BHLHE41/I |
| 5308 tags=67%,  | 112399/641GO_MF | EGLN3/P3H1/P4HA2/P3H3/EGLN2/P3H2/P4HB/O  |
| 1352 tags=20%,  | 112483/114GO_MF | SAT2/CHRNE/PCTP/SAT1/HTR2B/CETP/DRD1/BC  |
| 6337 tags=56%,  | 9156/2237/GO_MF | EXO1/FEN1/POLD1/EXOSC4/APEX2/ERI3/USB1/  |
| 7345 tags=46%,  | 29089/2735GO_MF | UBE2T/UBE2S/TRIM47/TRAIP/DTL/UHRF1/BIRC  |
| 1549 tags=83%,  | 6390/93055GO_MF | SDHB/COQ10A/SDHD/DHODH/ETFDH             |
| 2939 tags=35%,  | 54443/5585GO_MF | ANLN/PKN1/CDC42EP1/RTKN/PKN3/KCTD10/CDC  |
| 1099 tags=40%,  | 3965/81035GO_MF | LGALS9/COLEC12                           |
| 2868 tags=80%,  | 7345/333/1GO_MF | UCHL1/APLP1/ADRA2C/GRK2                  |
| 985 tags=30%,   | 10786/8375GO_MF | SLC17A3/SLC25A18/SFXN5/SLC16A12/SLC16A1  |
| 1251 tags=18%,  | 10786/6329GO_MF | SLC17A3/SCN4A/SLC20A2/SCN4B/KCNK1/SLC6A  |
| 1056 tags=33%,  | 2327/26029GO_MF | FMO2/CYP4X1/PCBD1/CYP4F22/CYP4F11/CYP11  |
| 1199 tags=71%,  | 5095/64087GO_MF | PCCA/MCCC2/PCCB/ACACB/PC                 |
| 985 tags=30%,   | 10786/8375GO_MF | SLC17A3/SLC25A18/SFXN5/SLC16A12/SLC16A1  |
| 3457 tags=37%,  | 23657/293/GO_MF | SLC7A11/SLC25A6/SLC26A6/SLC4A2/SLC37A1/  |
| 4701 tags=78%,  | 9401/641/4GO_MF | RECQL4/BLM/MSH2/RPS3/MUTYH/OGG1/MSH6     |
| 4701 tags=78%,  | 9401/641/4GO_MF | RECQL4/BLM/MSH2/RPS3/MUTYH/OGG1/MSH6     |
| 5452 tags=59%,  | 6627/6626/GO_MF | SNRPA1/SNRPA/LSM4/EFTUD2/NCBP2/LSM7/LSM  |
| 5184 tags=70%,  | 54751/140CGO_MF | FBLIM1/CRMP1/MICALL2/NEBL/DPYSL3/TMEM67  |
| 7311 tags=56%,  | 10644/5554GO_MF | IGF2BP2/RBM38/IGF2BP1/CCT5/EXOSC4/IGF2B  |
| 3332 tags=36%,  | 486/483/3CGO_MF | FXD2/ATP1B3/ANXA5/ATP13A2/ATP1A1/ATP6V   |
| 5895 tags=100%, | 4889/2834/GO_MF | NPY5R/PRLHR/PROKR2/NPY2R/QRFPR/NPY6R/NP  |
| 302 tags=38%,   | 6470/1084CGO_MF | SHMT1/ALDH1L1/FTCD                       |
| 3831 tags=37%,  | 10331/2585GO_MF | B3GNT3/B4GALNT1/GALNT10/B3GNT5/GBGT1/B3  |
| 955 tags=24%,   | 11004/7461GO_MF | KIF2C/CLIP2/MAPRE1/KIF18A                |
| 984 tags=40%,   | 2729/6505/GO_MF | GCLC/SLC1A1/GLUL/CPS1                    |
| 2022 tags=40%,  | 1649/26574GO_MF | DDIT3/AATF/DAPK3/ATF4                    |
| 4178 tags=29%,  | 1364/1192/GO_MF | CLDN4/CLIC1/FXD3/TTYH3/ANO9/CLIC3/SLC2   |
| 4952 tags=52%,  | 54913/9156GO_MF | RPP25/EXO1/RNASEH2A/FEN1/POP7/POP1/EDC3  |
| 2230 tags=33%,  | 6510/81539GO_MF | SLC1A5/SLC38A1/SLC7A7/SLC7A1/SLC7A11/SL  |
| 4288 tags=62%,  | 2526/2525/GO_MF | FUT4/FUT3/FUT2/FUT6/FUT1/POFUT2/FUT8/FU  |
| 6201 tags=64%,  | 8662/8894/GO_MF | EIF3B/EIF2S2/EIF3D/EIF3I/EIF2S3/DENR/EIF |
| 5304 tags=56%,  | 5768/64714GO_MF | QSOX1/PDIA2/ERO1A/PDIA6/GLRX2/PDIA3/P4H  |
| 5304 tags=56%,  | 5768/64714GO_MF | QSOX1/PDIA2/ERO1A/PDIA6/GLRX2/PDIA3/P4H  |
| 1981 tags=67%,  | 6510/81855GO_MF | SLC1A5/SFXN3/SLC1A4/SLC7A10              |
| 1487 tags=34%,  | 122970/209GO_MF | ACOT4/ESD/ACOT13/HIBCH/ACOT1/ACOT2/NUDT  |

|                                |                                          |
|--------------------------------|------------------------------------------|
| 476 tags=50%, 23305/5170GO_MF  | ACSL6/ACSL5/ACSL1/SLC27A2                |
| 476 tags=50%, 23305/5170GO_MF  | ACSL6/ACSL5/ACSL1/SLC27A2                |
| 3626 tags=37%, 29108/1075GO_MF | PYCARD/CTSC/FBLN1/PSMD14/BEX3/PSME3/ADRI |
| 6998 tags=40%, 4605/9242/GO_MF | MYBL2/MSC/ETV4/KIF2C/HMGA1/PITX1/FOXMI/; |
| 3894 tags=100%,10452/7416GO_MF | TOMM40/VDAC1/TOMM40L/VDAC3/VDAC2         |
| 1604 tags=43%, 128239/785GO_MF | IQGAP3/CXCR4/MY019                       |

A/AURKB/TPX2/CENPA/TACC3/KIF20A/TUBA1C/TUBA4A/CRYAB/NUF2/CDK1/NDC80/NEK2/STMN1/PTTG1/KIF2C/ASNS/CCNB2/CDT1/UBD/KIF4A/AURKB/TPX2/CENPA/FOXM1/SOX4/TACC3/CDC48/KDK/DBN1/ICAM1/POSTN/REG1A/STMN1/FBLIM1/TYRO3/PLXNA1/SRC/SEMA6A/SPINT2/RAC2/MELT2/PYCARD/CYBA/CXCL6/LY96/MDK/TNFRSF21/HOMER3/MMP12/IKBKE/FCER1G/POSTN/HILPDA/LGD/CYBA/CXCL6/LY96/MDK/TNFRSF21/HOMER3/MMP12/IKBKE/FCER1G/POSTN/HILPDA/LGALS9/SUMMP12/FCER1G/POSTN/HILPDA/LGALS9/SULF1/SRC/MAPK13/TYROBP/TGFB1/CYBB/GAPDH/RIPK2/EAD2/TGM3/SH3BP1/SULF1/PLXNA1/SRC/ETV5/SPINT2/DAB2/MMP14/LIF/SAPCD2/CSF1/TGFB1/OA/LPCAT1/IMPDH1/TREM2/PYCARD/CYBA/LCN2/MDK/ADGRE5/ANXA2/GLA/CTSC/FCER1G/ICAM1/L1/ALDOA/LPCAT1/IMPDH1/TREM2/PYCARD/CYBA/UBD/CXCL6/LCN2/CXCL8/ADGRE5/ANXA2/GLA/OA/LPCAT1/IMPDH1/TREM2/PYCARD/CYBA/LCN2/ADGRE5/ANXA2/GLA/CTSC/FCER1G/LGALS9/TMC/OA/LPCAT1/IMPDH1/PYCARD/CYBA/LCN2/ADGRE5/ANXA2/GLA/CTSC/FCER1G/TMC6/LGALS3/PLAU/OA/LPCAT1/IMPDH1/TREM2/PYCARD/CYBA/LCN2/MDK/ADGRE5/ANXA2/GLA/CTSC/FCER1G/ICAM1/ALDOA/GCNT3/LPCAT1/IMPDH1/PYCARD/CYBA/CXCL6/LCN2/ADGRE5/ANXA2/GLA/CTSC/FCER1G/OA/LPCAT1/IMPDH1/PYCARD/CYBA/CXCL6/LCN2/ADGRE5/ANXA2/GLA/CTSC/FCER1G/TMC6/LGALS/TOP2A/EPO/ANXA2/FCER1G/MELK/ANLN/LGALS9/BAK1/FOXJ1/TYRO3/SRC/CD3D/LGALS3/MMP14/1G/LGALS9/BAK1/FOXJ1/TYRO3/SRC/CD3D/MMP14/LIF/CSF1/TYROBP/TGFB1/CMTM7/SPI1/LGALPYCARD/CYBA/LIMK1/LY96/PGC/MDK/CXCL8/TNFRSF21/EPO/MMP12/IKBKE/CTSC/FCER1G/ICAM1KBKE/FCER1G/ARPC1B/TYRO3/SRC/CD3D/LGALS3/S100A14/ITGAM/FCGR3A/RIPK2/ADA/HAVCR2/SRC/CD3D/LGALS3/FCGR3A/RIPK2/ADA/CMTM3/PRKCD/LAT2/RELB/IGLL5/HLA-DRB1/PRNP/HRAKB/UBE2T/FOXM1/TOP2A/TRIP13/RRM2/CDCA5/CDC6/RECQL4/TK1/KPNA2/CDK1/MCM2/CDC45/NECQL4/CDK1/MCM2/CDC45/MCM4/NUDT1/RMI2/RFC4/CHAF1B/RAD51/TONSL/FANCI/EXO1/NEIL3/DB/CDK1/HJURP/MCM2/CDC45/MKI67/CCNA2/LIF/CHAF1B/CENPH/TGFB1/AURKA/SPI1/CBX2/HDAC39A/SNRPB/LAGE3/SF3B4/DCAF13/PUSL1/LARP6/EXOSC4/ALYREF/TSEN54/NOP56/ESRP1/RALY/17/EIF4EBP1/PTAFR/HSPB1/NCK2/IGF2BP1/LARP6/EEF1E1/CDK4/TCOF1/IGF2BP3/ZNF385A/RPOA/LPCAT1/IMPDH1/PYCARD/LGALS3BP/CYBA/LCN2/ADGRE5/TUBA4A/ANXA2/GLA/CTSC/FCER1G/MDK/CXCL8/CXCL5/FCER1G/LGALS9/VEGFB/PLXNA1/SRC/PLP2/SEMA6A/ARHGEF16/LGALS3/PLAU/UBE2T/FOXM1/SOX4/TOP2A/TRIP13/IER3/E2F1/CDCA5/RECQL4/IKBKE/CDK1/MCM2/CDC45/BAKC/KIF4A/AURKB/TPX2/CENPA/TACC3/KIF20A/TUBA1C/TUBA4A/CRYAB/NUF2/CDK1/NDC80/NEK2/DT1/UBD/AURKB/TPX2/SOX4/TACC3/TOP2A/TRIP13/E2F1/CDCA5/CDC6/TUBA4A/PKMYT1/CDK1/N6/CTHRC1/PYCARD/CYBA/FOXM1/SOX4/MDK/E2F1/SOX9/CDC6/EPO/MMP12/MARCKSL1/ANXA2/CXC/TSEN54/ESRP1/RALY/SNRPD2/SNRPD1/SNRPA1/CSTF2/SNRPA/SF3A2/CD2BP2/JMJD6/LSM4/HSPA17/AURKB/UBE2S/CDK1/BUB1B/DAB2/PBK/TRIB3/CCNF/AURKA/UBXN11/MAD2L1/PSMB9/GIPC1/DBD/AURKB/TPX2/FOXM1/SOX4/TACC3/KIF20A/TRIP13/RRM2/E2F1/CDCA5/SOX9/CDC6/TUBA4A/PYCARD/PKIB/LIMK1/AURKB/E2F1/CDCA5/ANXA2/ICAM1/ARPC1B/PFN2/NEK2/BAK1/DLGAP5/SRC/UBD/SOX4/TOP2A/E2F1/CTSC/MELK/LGALS9/ITM2C/BAK1/ANXA5/SRC/TSP0/ARHGEF16/PLAUR/C52A2/TOP2A/ANXA2/IKBKE/IL2RG/KPNA2/CDK1/ICAM1/LGALS9/BUB1/TYRO3/SRC/CCNA2/FBLNM38/DDX39A/SNRPB/PRKCD/HSPB1/SMG5/IGF2BP1/SF3B4/SMG9/EXOSC4/ALYREF/TSEN54/PKP3/SPI1/HDAC11/UHRF1/PHF19/PKN1/PRKCD/EZH2/DNMT1/HDAC7/MUC1/CHEK1/PRMT1/YEATS2/TRI/PYCARD/CXCL6/LCN2/CXCL8/EPO/MMP12/ANXA2/IKBKE/CXCL5/IL2RG/FCER1G/ICAM1/PLP2/TI/CCNB2/CAPG/TOP2A/MMP12/CDK1/STMN1/SH3BP1/MICAL1/TIMP1/TSP0/MMP11/ATP13A2/MMP14/RPD2/RAN/SNRPD1/MRT04/SF3A2/DHX37/RUVBL1/CD2BP2/LSM4/EIF3B/PES1/DKC1/NPM1/NOL3/MK1/MDK/DBN1/ICAM1/ANLN/ARPC1B/PFN2/STMN1/SH3BP1/FOXJ1/MICAL1/SRC/KIF23/RAC2/AT/ICAM1/ANLN/PFN2/NEK2/FOXJ1/SRC/RAC2/RHOV/RCC2/STK26/FLNA/EMP3/AGRN/CEP131/FXYD5/MK1/MDK/DBN1/ICAM1/ANLN/ARPC1B/PFN2/STMN1/SH3BP1/FOXJ1/MICAL1/SRC/KIF23/RAC2/TY/EPO/ANXA2/FCER1G/MELK/ANLN/LGALS9/BAK1/FOXJ1/TYRO3/SRC/CD3D/LGALS3/MMP14/LIF/C1G/SRC/LGALS3/LIF/CSF1/TYROBP/TGFB1/SPI1/GPC3/C1QC/CD74/BATF/RELB/EFNA4/NME1/CD1/SOX9/EPO/MMP12/COL1A1/ICAM1/POSTN/LGALS9/FOXJ1/EPCAM/PLXNA1/SRC/ITGA3/SEMA6A/TM4B/TREM2/KCTD17/UBD/BACE2/AURKB/PGC/SOX9/UBE2S/MMP12/ANXA2/CTSC/CDK1/BUB1B/TICARD/MDK/CXCL8/SOX9/COL1A1/ICAM1/POSTN/LGALS9/PFN2/VEGFB/SH3BP1/SULF1/PLXNA1/SR/CTHRC1/LIMK1/RGS2/MDK/TNFRSF21/EPO/DBN1/POSTN/REG1A/ITM2C/STMN1/PLXNA1/SRC/ITGA

KCTD17/LIMK1/RGS2/LCN2/MDK/EPO/DBN1/ICAM1/ANLN/REG1A/PFN2/ITM2C/PLXNA1/SRC/ITGA  
BE2S/CDCA3/TSP0/TRIM47/TRIB3/MAGEC2/CCNF/TRAIP/FANCI/RIPK2/DTL/UHRF1/BIRC3/BLMH  
D/SOX4/MDK/TNFRSF21/E2F1/CDCA5/SLC2A1/MMP12/CDK1/NDC80/FCER1G/POSTN/LGALS9/ANXA  
X9/MMP12/KPNA2/CDK1/NDC80/COL1A1/ANLN/KDEL3/SRC/TSP0/RAC2/LIF/ECT2/ARL2/TTK/TG  
A/SOX9/UBE2S/CRYAB/DBN1/ASF1B/HJURP/MCM2/ICAM1/CDC45/ANLN/ARPC1B/PFN2/STMN1/SRC  
2A6/NUDT1/GAPDH/ADA/IGF2BP2/YWHAZ/RNASEH2A/RBM38/FEN1/HK2/PFKFB4/PRKCD/HSPB1/SM  
E1/EXOSC4/TCOF1/TSEN54/NOP56/GTF3C6/RAN/NABP2/WDR4/INTS8/LIN28B/SLFN13/CSTF2/MR  
0A/LPCAT1/IMPDH1/PYCARD/CYBA/CXCL6/LCN2/CXCL8/ADGRE5/ANXA2/GLA/CTSC/FCER1G/TMC6  
CARD/MDK/CXCL8/SOX9/COL1A1/ICAM1/POSTN/LGALS9/PFN2/VEGFB/SH3BP1/SULF1/ANXA5/EPC  
/SOX9/COL1A1/ICAM1/POSTN/LGALS9/VEGFB/EPCAM/SRC/ITGA3/SEMA6A/LGALS3/RAC2/DAB2/M  
G/ICAM1/LGALS9/FOXJ1/SRC/CD3D/LGALS3/RAC2/TGFB1/GPNMB/LGALS1/RIPK2/ADA/HAVCR2/C  
0A/LPCAT1/IMPDH1/PYCARD/CYBA/CXCL6/LCN2/CXCL8/ADGRE5/ANXA2/GLA/CTSC/FCER1G/TMC6  
MDK/CXCL8/CXCL5/FCER1G/LGALS9/VEGFB/PLXNA1/SRC/PLP2/SEMA6A/ARHGEF16/LGALS3/PLAU  
17/EIF4EBP1/PTAFR/HSPB1/NCK2/SLC7A11/IGF2BP1/LARP6/EEF1E1/CDK4/TCOF1/IGF2BP3/ZN  
/UBD/SOX4/TOP2A/E2F1/CTSC/MELK/LGALS9/ITM2C/BAK1/ANXA5/SRC/TSP0/ARHGEF16/PLAUR/  
NS/AURKB/MDK/IER3/SOX9/EPO/CRYAB/ENO1/CDK1/FCER1G/ICAM1/CHST11/ANXA5/TYRO3/EPCA  
/UBD/SOX4/TOP2A/E2F1/CTSC/MELK/LGALS9/ITM2C/BAK1/ANXA5/SRC/TSP0/ARHGEF16/PLAUR/  
NS/AURKB/MDK/IER3/SOX9/EPO/CRYAB/ENO1/CDK1/FCER1G/ICAM1/CHST11/ANXA5/TYRO3/EPCA  
KB/UBE2S/CDK1/BUB1B/DAB2/PBK/TRIB3/CCNF/AURKA/UBXN11/MAD2L1/PSMB9/GIPC1/DDIT3/R  
/CDT1/CAPG/PYCARD/LIMK1/SOX9/CRYAB/DBN1/HJURP/ICAM1/ANLN/ARPC1B/PFN2/STMN1/FBLI  
AM1/ANLN/ARPC1B/PFN2/SRC/RAC2/ATP13A2/CLSTN1/ARL2/TGFB1/PSRC1/COR01A/FLNA/AGRN/  
CL8/SLC52A2/TOP2A/ANXA2/IKBKE/IL2RG/KPNA2/CDK1/ICAM1/LGALS9/BUB1/TYRO3/SRC/CCNA  
ENPA/CXCL8/SLC52A2/TOP2A/ANXA2/IKBKE/IL2RG/KPNA2/CDK1/ICAM1/REG1A/LGALS9/BUB1/T  
PTTG1/ALDOA/PAFAH1B3/PAEP/GTSF1/AFP/RGS2/MDK/TOP2A/TRIP13/E2F1/SOX9/SLC2A1/EPO/  
KB/TPX2/FOXJ1/SOX4/TACC3/TRIP13/RRM2/E2F1/CDCA5/CDC6/UBE2S/TUBA4A/CDKN3/PKMYT1/  
0A/LPCAT1/IMPDH1/PYCARD/LGALS3BP/CYBA/LCN2/ADGRE5/TUBA4A/ANXA2/GLA/CTSC/FCER1G/  
RD/CYBA/UBD/LY96/LCN2/MMP12/IKBKE/NCF2/FCER1G/ICAM1/LGALS9/TYRO3/SRC/LGALS3/CSF  
12/IKBKE/FCER1G/LGALS9/TYRO3/SRC/S100A14/ITGAM/RIPK2/HAVCR2/BIRC3/ITGB2/IRAK1/P  
1/LIMK1/RGS2/MDK/E2F1/SOX9/EPO/ANXA2/DBN1/COL1A1/REG1A/LGALS9/MAPK12/FOXJ1/PLXN  
0XM1/SOX4/CXCL8/TOP2A/TRIP13/RRM2/E2F1/CDC6/CDKN3/CDK1/NDC80/CDC45/NEK2/MAPK12/  
CARD/PKIB/RGS2/TPX2/CDC6/EPO/DUSP9/CDKN3/PKMYT1/CDK1/CDC25B/SRC/MMD/CKS2/RAC2/C  
0/FCER1G/ICAM1/LGALS9/BAK1/FOXJ1/TYRO3/SRC/CD3D/LGALS3/RAC2/MMP14/TYROBP/TGFB1/  
1/KIF2C/CDT1/KIF4A/AURKB/TPX2/TACC3/CDCA8/TOP2A/TRIP13/CDCA5/CDC6/UBE2S/NUF2/PK  
/TOP2A/EPO/ANXA2/FCER1G/MELK/ANLN/LGALS9/BAK1/FOXJ1/TYRO3/SRC/CD3D/LGALS3/MMP14  
MP12/TEAD2/TGM3/SH3BP1/SULF1/PLXNA1/ITGB4/SRC/ITGA3/ETV5/SPINT2/DAB2/MMP14/LIF/  
0/CTSC/FCER1G/LGALS9/FOXJ1/TYRO3/SRC/LGALS3/RAC2/MMP14/SERPINE2/TYROBP/TGFB1/IT  
/CXCL6/ATP1B3/MDK/CXCL8/CXCL5/COL1A1/FCER1G/ICAM1/LGALS9/VEGFB/SLC7A7/FOXJ1/EPC  
/TMSB10/RAP1GAP/CDT1/CAPG/AURKB/TOP2A/TRIP13/CRYAB/NDC80/MCM2/POSTN/PFN2/ITM2C/  
CARD/MDK/CXCL8/SOX9/COL1A1/ICAM1/POSTN/LGALS9/PFN2/VEGFB/STMN1/SH3BP1/SULF1/ANX  
/SOX9/COL1A1/ICAM1/POSTN/LGALS9/VEGFB/STMN1/EPCAM/SRC/ITGA3/SEMA6A/LGALS3/RAC2/  
NB2/PYCARD/PKIB/LIMK1/RGS2/AURKB/TPX2/CDC6/UBE2S/EPO/DUSP9/CDKN3/PKMYT1/CDK1/NE  
/RGS2/ATP1B3/RGS1/ICAM1/LGALS9/PFN2/BAK1/MAPK12/SH3BP1/FOXJ1/RGS10/LPAR2/ARHGEF  
X2/TACC3/MDK/DBN1/ICAM1/ARPC1B/PFN2/NEK2/STMN1/SH3BP1/ECT2/ARL2/CCNF/TGFB1/SKA1  
/CDCA8/CDCA5/TUBA4A/NUF2/CTSC/CDK1/NDC80/FCER1G/LGALS9/PFN2/NEK2/DLGAP5/KIF23/N  
/CDCA8/CDCA5/NUF2/CTSC/NDC80/FCER1G/LGALS9/PFN2/DLGAP5/KIF23/NCS1/RAC2/DNM1/CEN  
S2/MDK/TNFRSF21/E2F1/SOX9/EPO/DBN1/CTSC/CDK1/REG1A/ITM2C/PLXNA1/ITGA3/TSP0/SEMA  
K/E2F1/EPO/DBN1/REG1A/PLXNA1/ITGA3/TSP0/SEMA6A/MMD/ETV5/LIF/CLSTN1/SERPINE2/CSF  
2/LIMK1/RGS2/MDK/TNFRSF21/E2F1/SOX9/EPO/DBN1/CDK1/POSTN/REG1A/ITM2C/PLXNA1/ITGA  
5/SNCG/EPO/CRYAB/ANXA2/DBN1/CDK1/NDC80/FCER1G/LGALS9/PFN2/BAK1/SRC/ITGA3/ARHGEF  
R1/TREM2/ASNS/AURKB/SOX4/MDK/IER3/SOX9/EPO/CRYAB/ENO1/TEAD2/CDK1/FCER1G/ICAM1/C  
/CCNB2/AURKB/KIF20A/E2F1/CEP55/ANXA2/CTSC/CDK1/FCER1G/BAK1/SH3BP1/ETV5/CD3D/NDR



SOX4/UBE2S/CDK1/CDCA3/TSP0/TRIM47/CCNA2/TRIB3/MAGEC2/CCNF/TRAIP/FANCI/RIPK2/DTL4A/AURKB/TPX2/CENPA/TUBA4A/CDK1/ANLN/NEK2/FOXJ1/SRC/KIF23/WDR62/CENPF/KIFC1/MISXA2/FCER1G/ITGA3/ETV5/ARHGEF16/LYPD1/LGALS3/DAB2/MMP14/CLSTN1/TGFB1/ITGAM/GPC4/D/FOXM1/IER3/EPO/CRYAB/ENO1/BAK1/PBK/RMI2/RAD51/STK26/DKK1/RIPK2/GSTP1/CD44/CDKMK1/CRYAB/ANXA2/DBN1/COL1A1/ICAM1/ARPC1B/PFN2/STMN1/SH3BP1/MICAL1/SRC/MMP11/RACMDK/TNFRSF21/SOX9/EPO/ANXA2/ICAM1/LGALS9/FOXJ1/FBLIM1/TYRO3/EPCAM/SRC/CLIC1/LGAICAM1/ANLN/PFN2/NEK2/FOXJ1/RAC2/RCC2/STK26/FLNA/EMP3/AGRN/CEP131/FXYD5/TUBG1/S1KCTD17/LIMK1/RGS2/MDK/EPO/DBN1/ICAM1/ANLN/REG1A/PFN2/ITM2C/PLXNA1/SRC/ITGA3/SEM2/SOX4/TRIP13/E2F1/CDCA5/CDC6/TUBA4A/CDK1/NDC80/CDC45/ANLN/NEK2/BUB1/DLGAP5/CDCPTTG1/KIF2C/CCNB2/CDT1/UBD/KIF4A/AURKB/TPX2/CENPA/FOXM1/SOX4/TACC3/CDCA8/KIF20A4/LIF/CSF1/TYROBP/TGFB1/SPI1/RIPK2/ADA/C1QC/CD74/FANCD2/SLAMF8/NME1/SYK/IL18/NM1/NDC80/FCER1G/SRC/ITGA3/ARHGEF16/LYPD1/LGALS3/RAC2/ATP13A2/DAB2/CCNE1/MMP14/LICARD/MDK/CXCL8/SOX9/COL1A1/ICAM1/POSTN/LGALS9/PFN2/VEGFB/SH3BP1/SULF1/ANXA5/EPC/SOX9/COL1A1/ICAM1/POSTN/LGALS9/VEGFB/EPCAM/SRC/ITGA3/SEMA6A/LGALS3/RAC2/DAB2/MNRPD1/SNRPA1/CSTF2/SNRPA/SF3A2/CD2BP2/JMJD6/LSM4/HSPA8/UPF3B/POLR2G/EFTUD2/PPIHNRPD1/SNRPA1/CSTF2/SNRPA/SF3A2/CD2BP2/JMJD6/LSM4/HSPA8/UPF3B/POLR2G/EFTUD2/PPIHNRPD1/SNRPA1/CSTF2/SNRPA/SF3A2/CD2BP2/JMJD6/LSM4/HSPA8/UPF3B/POLR2G/EFTUD2/PPIHA1/EPO/CRYAB/ENO1/ICAM1/POSTN/HILPDA/REG1A/VEGFB/SRC/NDRG1/MMP14/CCNA2/TGFB1/ST0A/LPCAT1/IMPDH1/PYCARD/CYBA/CXCL6/LCN2/ADGRE5/ANXA2/GLA/CTSC/FCER1G/LGALS9/TMC0/CTSC/FCER1G/LGALS9/FOXJ1/TYRO3/SRC/LGALS3/RAC2/MMP14/TYROBP/TGFB1/ITGAM/GPNMBF21/IKBKE/FCER1G/ARPC1B/TYRO3/SRC/CD3D/LGALS3/S100A14/ITGAM/FCGR3A/RIPK2/ADA/HALYREF/TSEN54/ESRP1/RALY/SNRPD2/HSF1/SNRPD1/SNRPA1/CSTF2/SNRPA/SF3A2/CD2BP2/JMJD2/SNRPB/PRKCD/SMG5/SYK/NUP62/GTSE1/MX2/ALYREF/SNRPD2/RAN/RANGAP1/TRIM28/SNRPD1/NUPPO/ICAM1/LGALS9/FOXJ1/SRC/LGALS3/RAC2/PODXL2/TGFB1/GPNMB/LGALS1/RIPK2/ADA/HAVCR3BP1/SRC/ITGA3/ARHGEF16/RAC2/CCNA2/CSF1/DEPDC1B/ECT2/IQGAP3/RHOV/ARHGAP4/COL1A2/YWHAZ/KRT17/RBM38/EIF4EBP1/PTAFR/PRKCD/HSPB1/NCK2/IGF2BP1/NUP62/LARP6/EXOSC4/C0X4/TRIP13/RRM2/E2F1/CDC6/CDK1/NDC80/NEK2/BUB1/BUB1B/LIF/CENPF/ORC1/CCNF/TTK/RAN1/REG1A/ITM2C/PLXNA1/ITGA3/SEMA6A/NCS1/ARHGAP4/LGALS1/DKK1/TNFRSF12A/SNAP25/ROCOL1A1/ICAM1/POSTN/SULF1/MFAP2/ITGB4/TIMP1/ITGA3/MMP11/SPINT2/MMP14/MELTF/LOXL4/SOX9/COL1A1/ICAM1/POSTN/LGALS9/VEGFB/SRC/ITGA3/SEMA6A/LGALS3/RAC2/DAB2/MMP14/CF18B/ARHGEF2/SMARCD3/PLEK/TRIM54/ASPH/TWF2/MID1IP1/DNAJC6/KIF18A/CFL1/SMARCD1/CAURKB/TACC3/TOP2A/TRIP13/CDCA5/CDC6/NDC80/MCM2/CDC45/NEK2/BUB1/DLGAP5/BUB1B/MKIP/ICAM1/ARPC1B/PFN2/STMN1/FBLIM1/SRC/ARL2/TGFB1/DKK1/PSRC1/COR01A/PMEPA1/EIF4EBOA/LPCAT1/IMPDH1/PYCARD/CYBA/LCN2/ADGRE5/ANXA2/GLA/CTSC/FCER1G/LGALS9/TMC6/LGALO/LPCAT1/IMPDH1/PYCARD/CYBA/LCN2/ADGRE5/ANXA2/GLA/CTSC/FCER1G/TMC6/LGALS3/PLAUKB/TPX2/FOXM1/SOX4/TACC3/TRIP13/RRM2/E2F1/CDCA5/CDC6/UBE2S/TUBA4A/CDKN3/PKMYT1/F1/CDCA5/CDC6/CDK1/NDC80/CDC45/DLGAP5/CDC25B/SRC/KIF23/CKS2/CCNE1/ECT2/NUSAP1/TDX39A/SNRPB/PRKCD/SMG5/SYK/NUP62/GTSE1/MX2/ALYREF/SNRPD2/RAN/RANGAP1/TRIM28/SNRCCNB2/CDT1/KIF4A/AURKB/TPX2/CENPA/TACC3/CDCA8/MDK/KIF20A/TOP2A/TUBA1C/CDCA5/CEPPKIB/RGS2/CDC6/DUSP9/CDKN3/PKMYT1/CDK1/SRC/CKS2/CCNE1/CCNA2/TRIB3/CCNF/TGFB1/IQ2F1/EPO/ENO1/IKBKE/CTSC/ICAM1/MELK/LGALS9/ITM2C/BAK1/SRC/LGALS3/PLAUR/TRIB3/TYRM1/ARPC1B/PFN2/STMN1/SH3BP1/ARL2/PSRC1/COR01A/FLNA/COTL1/ARHGEF2/PRKCD/NCK2/BAIPB1/IGF2BP1/SF3B4/EXOSC4/PKP3/IGF2BP3/HSF1/PSMB9/PSMD14/YBX3/MAPKAPK2/DHX34/PCBO/FCER1G/SRC/ITGA3/ARHGEF16/LGALS3/RAC2/LIF/TYROBP/ECT2/TGFB1/ITGAM/STX3/SQSTM1G/ANLN/ITGA3/ARHGEF16/LYPD1/LGALS3/DAB2/MMP14/SAPCD2/CLSTN1/MISP/TGFB1/GPC4/STX1/KIF2C/CDT1/KIF4A/AURKB/TPX2/TACC3/CDCA8/TOP2A/TRIP13/CDCA5/CDC6/UBE2S/NUF2/PKCD3D/LGALS3/FCGR3A/RIPK2/ADA/CMTM3/PRKCD/LAT2/RELB/IGLL5/HLA-DRB1/PRNP/HRAS/SYKPRKCD/HSPB1/SMG5/IGF2BP1/SMG9/EXOSC4/PKP3/RNASE6/IGF2BP3/RPL8/PSMB9/PSMD14/YBX3G5/IGF2BP1/SMG9/EXOSC4/PKP3/IGF2BP3/RPL8/PSMB9/PSMD14/YBX3/MAPKAPK2/DHX34/PCBP4M1/ARPC1B/PFN2/STMN1/SH3BP1/MICAL1/SRC/RAC2/POF1B/ENAH/RHOV/COR01A/MARCKS/FLNA/1/CAPG/AURKB/TOP2A/TRIP13/NDC80/MCM2/PFN2/NEK2/STMN1/BUB1/BUB1B/SRC/TSP0/LIF/CE

S9/FOXJ1/EPCAM/SRC/LGALS3/SPINT2/SERPINE2/TGFB1/GPNMB/LGALS1/RIPK2/ADA/HAVCR2/C  
K/EPO/DBN1/ANLN/REG1A/PLXNA1/SRC/ITGA3/RAC2/TNFRSF12A/AGRN/ROBO1/SERPINI1/PLXNA  
1/ARPC1B/PFN2/SH3BP1/SEMA6A/ATP13A2/IQGAP3/ARHGAP4/CORO1A/TNFRSF12A/COTL1/PRKCD  
EN54/NOP56/WDR4/INTS8/LIN28B/CSTF2/MRT04/DHX37/PES1/DKC1/TRMU/FTSJ1/METTL1/RPS2  
A1/EPO/CRYAB/ENO1/ICAM1/POSTN/HILPDA/REG1A/VEGFB/SRC/NDRG1/MMP14/CCNA2/TGFB1/ST  
CXCL8/TOP2A/MMP12/ANXA2/KPNA2/LGALS9/TIMP1/LHFPL2/AURKA/LGALS1/GAPDH/RIPK2/ADA/  
GALS9/SRC/MMP14/TYROBP/TGFB1/ITGAM/LGALS1/RIPK2/ADA/HAVCR2/CORO1A/CLCF1/ITGB2/C  
2/CDK1/NEK2/SRC/CCNA2/RMI2/RFC4/TGFB1/RAD51/SPI1/CLCF1/DSCC1/PRKCD/SMG5/HRAS/PI  
J1/TYRO3/SRC/LGALS3/RAC2/MMP14/TYROBP/TGFB1/GPNMB/LGALS1/RIPK2/ADA/HAVCR2/CORO1  
/RECQL4/NEK2/TYRO3/SRC/TTF2/NCS1/RAC2/CCNE1/RFC4/CSF1/AKR1B1/TGFB1/RAD51/EXO1/C  
A1/EPO/CRYAB/ENO1/COL1A1/ICAM1/POSTN/HILPDA/REG1A/VEGFB/SRC/NDRG1/MMP14/CCNA2/T  
TGB2/SNAP25/ADORA1/PRNP/HRAS/RAB31/SCRIB/RPL8/UBL4A/RAB34/ANXA13/NCF1/CHMP4B/BA  
2/SOX4/TRIP13/E2F1/CDCA5/CDC6/TUBA4A/CDK1/NDC80/CDC45/ANLN/NEK2/BUB1/DLGAP5/CDC  
SC/ICAM1/LGALS9/ITM2C/BAK1/SRC/LGALS3/PLAUR/GSTP1/TNFRSF12A/YWHAZ/CD44/CD74/ARH  
GALS9/SRC/MMP14/TYROBP/TGFB1/ITGAM/LGALS1/RIPK2/ADA/HAVCR2/CORO1A/CLCF1/ITGB2/C  
1/MCM2/CDC45/GINS1/MCM4/ORC6/CCNE1/CCNA2/RMI2/RFC4/ORC1/CHAF1B/RAD51/TONSL/EXO1  
/KIF4A/AURKB/TACC3/CDCA8/TOP2A/TRIP13/CDCA5/CDC6/NUF2/NDC80/HJURP/NCAPG/NEK2/BU  
OX4/TOP2A/TRIP13/E2F1/CDC6/CDK1/NDC80/BUB1/BUB1B/ZWINT/CENPF/ORC1/TTK/TGFB1/AUR  
J1/SRC/LGALS3/RAC2/TGFB1/GPNMB/LGALS1/RIPK2/ADA/HAVCR2/CORO1A/CD74/CCDC88B/NCK2  
C1B/PFN2/STMN1/ARL2/PSRC1/CORO1A/TUBG1/COTL1/PRKCD/NCK2/BAIAP2L2/VASP/CDC42EP1/  
FOXJ1/LGALS3/RAC2/CSF1/TYROBP/TGFB1/GPNMB/RIPK2/ADA/HAVCR2/CORO1A/MZB1/CLCF1/CD  
4/DHX37/PES1/DKC1/NPM1/RPS2/RRS1/DDX49/RRP9/ERI3/REX04/RRP1/BRIX1/RRP7A/PA2G4/F  
5/FCER1G/LGALS9/VEGFB/ARHGEF16/LGALS3/RAC2/CSF1/S100A14/CORO1A/GSTP1/ITGB2/CD74  
GALS9/FOXJ1/LGALS3/RAC2/CSF1/TYROBP/TGFB1/GPNMB/RIPK2/ADA/HAVCR2/CORO1A/GSTP1/M  
S9/FOXJ1/SRC/LGALS3/TGFB1/GPNMB/LGALS1/RIPK2/ADA/HAVCR2/CORO1A/CD44/ITGB2/IRAK1  
PX2/LCN2/NCF2/CDK1/MELK/SRC/ETV5/MAPK13/ATP13A2/CCNA2/ECT2/TXNRD1/STK26/CYBB/GS  
M4/RMI2/TGFB1/RAD51/TONSL/EXO1/CLCF1/RAD54L/MCM6/FEN1/BATF/GINS2/MCM7/PIF1/MCM3  
IF23/KIFC1/KIF18B/CEP131/RACGAP1/KLC2/HSPB1/KIF11/WDR34/IFT57/KIF12/TMEM201/KIF  
P1/ADORA1/MVP/NUP62/MX2/ALYREF/IGF2BP3/SLC25A6/RAN/HSF1/EIF5A2/NUTF2/NUP210/SLC  
F3C6/SLFN13/MRT04/DHX37/PES1/DKC1/CD3EAP/SMARCA4/RPS2/PELO/RRS1/DDX49/RRP9/DDX1  
TRIM28/SIRT6/LIN28B/NUP210/NAA40/CNOT11/MAP2K2/POLR2G/PABPC1/HDAC1/NUP93/NUP205  
/STX3/CEP131/SNAP25/DDX39A/SMG5/HRAS/NUP62/WDR34/DLG3/ALYREF/EZR/SCRIB/IFT57/RA  
CMTM7/LGALS1/ADA/EXO1/MZB1/CLCF1/CD74/BATF/PKN1/PRKCD/LAT2/SLAMF8/IGLL5/SYK/HMG  
TUBA4A/PKMYT1/CDK1/MELK/NEK2/CDC25B/CCNA2/CENPF/ORC1/RCC2/AURKA/HMMR/CDC25C/DTL  
ROBP/TGFB1/LGALS1/RIPK2/ADA/HAVCR2/CORO1A/CLCF1/CD74/CCDC88B/NCK2/IGLL5/SYK/IL1  
O1/IKBKE/MELK/BAK1/SRC/PLAUR/TRIB3/CD44/CD74/ARHGEF2/BCL2A1/PRKCD/HSPB1/NCK2/HR  
IL2RG/FCER1G/ARPC1B/SH3BP1/TYRO3/SRC/TYROBP/TGFB1/ITGAM/FCGR3A/CORO1A/ITGB2/PRK  
DK1/MAPK12/TGFB1/AURKA/CDC25C/PRR11/CDKN2A/PRNP/HRAS/GTSE1/CDK4/MUC1/CDKN2D/ZNF  
2/FCER1G/ICAM1/KIF23/CTSV/CYBB/HLA-DMA/RACGAP1/CD74/KLC2/RELB/ITGAV/HLA-DRB1/HL  
VBL1/CD2BP2/LSM4/EIF3B/NPM1/NOL3/EIF2S2/HSP90AB1/DYNC1H1/TICRR/RRS1/WDR77/BRIX1  
TGFB1/PSRC1/CORO1A/NCK2/BAIAP2L2/VASP/PLEK/SYK/CDC42EP1/HCK/MAPRE1/ASAP1/MMP1/G  
3/CDK1/MCM2/CDC45/MCM4/ORC6/CCNE1/CCNA2/ORC1/IQGAP3/AURKA/GPNMB/TYMS/CDC25C/CDK  
FOXJ1/LGALS3/RAC2/TYROBP/TGFB1/GPNMB/RIPK2/ADA/HAVCR2/CORO1A/MZB1/CLCF1/CD74/CC  
/BAK1/CSF1/TGFB1/SPI1/ADA/CORO1A/CD74/PKN1/SLC7A11/EZH2/PRMT1/HMGB2/JAK3/HMOX1/  
T2/IGLL5/HLA-DRB1/PRNP/HRAS/SYK/HLA-DQA1/PAG1/HLA-DRA/EZR/HLA-DQB1/VTCN1/PSMB9/  
T1/NEK2/BUB1/CDC25B/BUB1B/CKS2/CCNE1/LIF/P3H4/TTK/RAD51/AURKA/EXO1/NCAPD2/CDC25  
E2F1/CDK1/NDRG1/RMI2/RFC4/AURKA/EXO1/CDC25C/BOP1/CD44/CD74/BATF/GTSE1/EEF1E1/MU  
CA5/CDC6/CDK1/NDC80/CDC45/DLGAP5/CDC25B/KIF23/CCNE1/ECT2/NUSAP1/TGFB1/RCC2/AURK  
1/KIF2C/CDT1/KIF4A/AURKB/TPX2/TACC3/CDCA8/TRIP13/CDCA5/CDC6/UBE2S/NUF2/PKMYT1/N  
CD2/CSF1/TGFB1/DKK1/GPC4/GPC3/ROBO1/FZD6/TNFRSF11B/MAGED1/FZD7/PSMB9/PSMD14/HNF  
3/CDK1/MCM2/CDC45/MCM4/ORC6/CCNE1/ORC1/IQGAP3/AURKA/GPNMB/TYMS/CDC25C/CDKN2A/MC

TUBA4A/PKMYT1/CDK1/MELK/NEK2/CDC25B/CCNA2/CENPF/ORC1/RCC2/AURKA/HMMR/CDC25C/DTL  
F/CSF1/TYROBP/TGFB1/SPI1/GPC3/C1QC/CD74/BATF/RELB/EFNA4/NME1/CD109/NME2/CSF1R/T  
N2/SH3BP1/MICAL1/ENAH/COR01A/COTL1/PRKCD/NCK2/BAIAP2L2/VASP/PLEK/CDC42EP1/HCK/T  
36A/POLR2G/SMARCA4/RPS2/HDAC1/NUP93/NUP205/NUP37/LEF1/NDC1/NELFE/POLR2H/NUP188/  
FB1/LGALS1/RIPK2/ADA/HAVCR2/COR01A/CD44/ITGB2/IRAK1/CD74/CCDC88B/PTAFR/NCK2/SYK  
X2/ALYREF/IGF2BP3/RAN/HSF1/EIF5A2/NUTF2/NUP210/NPM1/UPF3B/ZC3H3/RRS1/NUP93/NXT1  
X2/ALYREF/IGF2BP3/RAN/HSF1/EIF5A2/NUTF2/NUP210/NPM1/UPF3B/ZC3H3/RRS1/NUP93/NXT1  
GALS3/RAC2/TYROBP/TGFB1/GPNMB/RIPK2/ADA/HAVCR2/COR01A/MZB1/CLCF1/CD74/CCDC88B/P  
9/RECQL4/ASF1B/CDK1/HJURP/NCAPG/MCM2/CDC45/GINS1/MCM4/RFC4/CHAF1B/NUSAP1/CENPH/  
VBL1/CD2BP2/LSM4/EIF3B/NPM1/NOL3/EIF2S2/PELO/HSP90AB1/DYNC1H1/TICRR/RRS1/WDR77/  
/AURKB/TACC3/CDCA8/TOP2A/TRIP13/CDCA5/CDC6/NUF2/NDC80/NCAPG/NEK2/BUB1/DLGAP5/BU  
C1B/PFN2/STMN1/SH3BP1/COR01A/FLNA/COTL1/PRKCD/NCK2/BAIAP2L2/VASP/PLEK/CDC42EP1/  
IP13/E2F1/CDC6/CDK1/NDC80/BUB1/BUB1B/CENPF/ORC1/TTK/AURKA/GPNMB/CDC25C/DTL/CDKN  
B/LGALS9/BAK1/MICAL1/SRC/PLAUR/RIPK2/BIRC3/CD44/ROBO1/SYK/S100A8/ASPH/CASP4/CDK  
AD51AP1/EEF1E1/MUC1/CDKN2D/ANKRD1/ZNF385A/CHEK1/NPAS2/HSF1/TRIM28/SIRT6/MIF/WDR  
CT5/MX2/ALYREF/IGF2BP3/ZNF385A/RAN/HSF1/CCT6A/CCT3/EIF5A2/NUTF2/NUP210/RUVBL1/D  
NT2/SAPCD2/MISP/RHOV/ARHGEF2/MAD2L1/DLG3/SCRIB/RHOG/CFL1/RHOQ/FSCN1/RHOC/MAP2/F  
GALS3/RAC2/CSF1/TYROBP/TGFB1/GPNMB/RIPK2/ADA/HAVCR2/COR01A/MZB1/CLCF1/CD74/CCDC  
ALS1/RIPK2/ADA/HAVCR2/COR01A/CD74/CCDC88B/NCK2/SYK/IL18/VTCN1/TFRC/HLA-DPA1/HLA  
IP13/E2F1/CDC6/CDK1/NDC80/BUB1/BUB1B/CENPF/ORC1/TTK/AURKA/GPNMB/CDC25C/CDKN2A/G  
FB1/LGALS1/RIPK2/ADA/HAVCR2/COR01A/CD44/ITGB2/IRAK1/CD74/CCDC88B/PTAFR/NCK2/SYK  
P2A/TRIP13/E2F1/CDC6/CDK1/NDC80/CDC45/BUB1/BUB1B/ZWINT/CENPF/ORC1/TTK/TGFB1/AUR  
1/LSM4/RPL36A/PPP2R1A/UPF3B/POLR2G/RPS2/PELO/PABPC1/RNPS1/ZC3H12A/NCBP2/RPL17/R  
X37/PES1/DKC1/RPS2/RRS1/DDX49/RRP9/ERI3/REXO4/RRP1/RRP7A/PA2G4/FBL/DDX27/NOP2/G  
GRN/PFDN4/CCT6A/CCT3/P3H1/DNAJC5/HSPA6/FKBP1A/PDRG1/GNAZ/HSPA8/SUCO/NUDC/PIIH/P  
CHMP4B/SSR2/MTCL1/VPS37C/SEC61A1/ZDHHC7/RPL36A/MICALL1/PAK1/SLC51B/RPS2/GDI1/RP  
N2/STMN1/ARL2/PSRC1/COR01A/COTL1/PRKCD/NCK2/BAIAP2L2/VASP/CDC42EP1/HCK/MAPRE1/T  
B/LGALS9/BAK1/MICAL1/SRC/PLAUR/BIRC3/CD44/ROBO1/SYK/S100A8/CASP4/CDKN2D/IFT57/R  
ALS1/GAPDH/CD74/ITGAV/CSF1R/CFL1/APOBEC3C/TRIM6/CHMP4B/TRIM28/CCL5/CXCR4/TRIM11  
PDA/SRC/NDRG1/CCNA2/STC2/CYBB/IRAK1/EIF4EBP1/ANKRD1/PGK1/PSMB9/PSMD14/HMOX1/SLC  
/MCM2/CDC45/MCM4/CENPF/CHAF1B/CENPH/RAD51/MCM6/CENPW/SMARCD3/OIP5/MCM7/MCM3/NAP  
8/CXCL5/FCER1G/VEGFB/LGALS3/RAC2/MMP14/CSF1/S100A14/ITGB2/CD74/P2RX4/SLAMF8/NBL  
NEK2/CDC25B/CENPF/ORC1/RCC2/AURKA/HMMR/CDC25C/DTL/CEP131/TUBG1/SMARCD3/GTSE1/MA  
/AURKB/TACC3/CDCA8/TOP2A/TRIP13/CDCA5/CDC6/NUF2/NDC80/NCAPG/NEK2/BUB1/DLGAP5/BU  
M4/RMI2/RAD51/TONSL/RAD54L/MCM6/FEN1/GINS2/MCM7/MCM3/RAD51AP1/EME1/CDC7/CHEK1/H  
F/RAN/RANGAP1/NUTF2/NUP210/NPM1/UPF3B/RRS1/NUP93/NXT1/NUP205/NUP37/RNPS1/NDC1/X  
NEK2/CDC25B/CENPF/ORC1/RCC2/AURKA/HMMR/CDC25C/DTL/CEP131/TUBG1/SMARCD3/MAPRE1/T  
FBLN1/RIPK2/EFNA3/ROBO1/SYK/S100A8/ASPH/CASP4/IFT57/GRN/HSF1/CARD9/TRAF2/PSMD14  
5/FCER1G/LGALS9/VEGFB/LGALS3/RAC2/CSF1/S100A14/COR01A/ITGB2/CD74/SLAMF8/NBL1/SY  
A1/AURKA/PSRC1/SKA3/CEP131/ARHGEF2/TRIM54/KIF11/NUP62/SPAG5/MAPRE1/MID1IP1/CHEK  
/PRNP/HRAS/HLA-DQA1/PAG1/HLA-DRA/EZR/HLA-DQB1/VTCN1/PSMB9/HLA-DPA1/RBCK1/PSMD14  
F/RAN/RANGAP1/NUTF2/NUP210/NPM1/UPF3B/RRS1/LZTS2/NUP93/NXT1/NUP205/NUP37/RNPS1/  
X2/ALYREF/IGF2BP3/RAN/HSF1/EIF5A2/NUTF2/NUP210/NPM1/UPF3B/ZC3H3/RRS1/NUP93/NXT1  
C1/COR01A/FLNA/NCK2/PLXNA3/BAIAP2L2/VASP/PLEK/HRAS/CDC42EP1/NUP62/HCK/SPAG5/MAP  
F2BP1/EXOSC4/PKP3/IGF2BP3/PSMB9/PSMD14/YBX3/MAPKAPK2/DHX34/PCBP4/PSMD2/HSPA8/NP  
CD2/TGFB1/DKK1/GPC4/GPC3/FZD6/MAGED1/FZD7/PSMB9/PSMD14/HNF1B/SIRT6/PTK7/PSMD2/I  
36A/NPM1/POLR2G/EIF2S2/RPS2/PABPC1/TICRR/PPP1CA/NCBP2/RPL17/RPLP2/EIF3D/RPSA/AT  
B/TPX2/TACC3/NUF2/NDC80/NEK2/STMN1/PRC1/KIF23/WDR62/KIFC1/MISP/TTK/AURKA/PSRC1/  
80/PKP3/KRT7/ST14/SHARPIN/PERP/CNFN/KRT18/CAPN1/KRT8/CAPNS1/CYP26B1/EVPL  
2/FCER1G/KIF23/CTSV/CYBB/HLA-DMA/RACGAP1/CD74/KLC2/ITGAV/HLA-DRB1/HLA-DQA1/KIF1  
4/TGFB1/RAD51/CLCF1/DSCC1/PRKCD/HRAS/CCT5/DNMT1/CDC7/NPAS2/HSF1/NABP2/CCT6A/TFR

C25B/PRC1/KIF23/ORC6/KIF18B/ECT2/TGFB1/AURKA/RACGAP1/NUP62/PGF/GIT1/ASPM/GIPC1/A1/AURKA/PSRC1/SKA3/CEP131/ARHGEF2/TRIM54/KIF11/NUP62/SPAG5/MAPRE1/MID1IP1/CHEK GALS3/RAC2/CSF1/TYROBP/TGFB1/GPNMB/RIPK2/ADA/HAVCR2/COR01A/GSTP1/MZB1/CLCF1/CD7 3/CTSV/CYBB/HLA-DMA/RACGAP1/CD74/KLC2/ITGAV/HLA-DRB1/HLA-DQA1/KIF11/TAP1/HLA-DR NFRSF12A/PLXNA3/PLEK/CDK4/TWF2/TRPV2/SLC12A2/VAV1/SEMA4A/MAP2/SLC12A9/MSN/EFNA5 NT2/TGFB1/FOLR1/VASP/FZD6/SCRIB/IFT57/CFL1/HNF1B/MTHFD1L/PTK7/STIL/HIF1A/FZD1/S 3/CTSV/CYBB/HLA-DMA/RACGAP1/CD74/KLC2/ITGAV/HLA-DRB1/HLA-DQA1/KIF11/TAP1/HLA-DR /SNAP25/TUBG1/CPLX2/PLEK/MAPRE1/TUBB/YKT6/EZR/TUBB4B/TCTN2/MSN/RAB15/STXBP2/SSN N2/COR01A/COTL1/PRKCD/NCK2/BAIAP2L2/VASP/CDC42EP1/HCK/TMSB4X/TWF2/MICALL2/CARMI CCDC88B/HSPB1/WDR34/TUBB/IFT57/TMEM201/KIF3C/DTNBP1/MAP2/FLOT2/SSNA1/HIF1A/HSPA N2/SH3BP1/COR01A/COTL1/PRKCD/NCK2/BAIAP2L2/VASP/PLEK/CDC42EP1/HCK/TMSB4X/TWF2/C T2/SYK/HCK/PSMB9/WIPF3/PSMD14/WASF2/VAV1/ARPC4/PSMD2/MAPK3/PAK1/HSP90AB1/ARPC2/ GALS3/RAC2/TGFB1/GPNMB/RIPK2/HAVCR2/COR01A/CCDC88B/NCK2/ELF4/PRNP/SYK/IL18/CD15 F2BP1/EXOSC4/IGF2BP3/PSMB9/PSMD14/YBX3/MAPKAPK2/PCBP4/PSMD2/HSPA8/DKC1/NPM1/YBX 1/TRAIP/RIPK2/GSTP1/BIRC3/IRAK1/CD74/ROB01/SYK/CASP4/IFNGR2/SCRIB/TRAF2/RBCK1/T 44/CD74/EEF1E1/MUC1/ANKRD1/ZNF385A/CHEK1/RHNO1/MIF/RNF34/CHD3/PPP1R13L/TAF6/RBB GFB1/PHF19/FEN1/CCT5/DNMT1/MUC1/NABP2/CCT6A/CCT3/TRIM28/ESPL1/SIRT6/MAPK3/DKC1/ S9/VEGFB/LGALS3/RAC2/MMP14/CSF1/S100A14/TGFB1/ADA/CD74/PTAFR/P2RX4/SLAMF8/ADORA CLGN/HSPB1/NCK2/SERPINH1/CREB3L1/COMP/HSF1/DDIT3/BAX/HSPA6/CREB3/MANF/HSPA8/LMN N2/SH3BP1/COR01A/COTL1/PRKCD/NCK2/BAIAP2L2/VASP/PLEK/CDC42EP1/HCK/TMSB4X/TWF2/C LR2G/SMARCA4/RPS2/HDAC1/NUP93/NUP205/NUP37/LEF1/NDC1/NELFE/POLR2H/NUP188/RPL17/ I/DKK1/GPC3/WNK2/ASPM/PSMB9/PSMD14/PTK7/RUVBL1/PSMD2/EDA/MLLT3/SMARCA4/CSNK1E/F LHFPL2/AURKA/LGALS1/GAPDH/RIPK2/HAVCR2/CD74/PTAFR/SYK/PLCB1/CSF1R/GRN/CFL1/CHMP CDC45/MCM4/CENPF/CHAF1B/CENPH/RAD51/MCM6/CENPW/OIP5/MCM7/MCM3/NAP1L1/CENPO/CENP 4/TYMS/DTL/DSCC1/POLD1/SMG5/PIF1/CCT5/CDKN2D/ANKRD1/CCT6A/CCT3/POLA2/MAD2L2/CHT 5/TUBG1/CPLX2/PLEK/MAPRE1/TUBB/YKT6/TUBB4B/TCTN2/RAB15/STXBP2/SSNA1/PPP2R1A/STX /CDC25B/BUB1B/CKS2/CCNE1/LIF/P3H4/TTK/RAD51/AURKA/NCAPD2/CDC25C/RAD54L/TUBG1/NC /ITM2C/BAK1/PLAUR/TNFRSF12A/YWHAZ/PRKCD/NCK2/S100A8/MAGED1/DDIT3/TRAF2/RBCK1/BA 2A/CENPW/SMARCD3/OIP5/CENPO/CENPU/HMGB3/CHEK1/SMARCD1/CENPL/HMGB2/SIRT6/RUVBL1/ AD51/EXO1/FEN1/POLD1/SMG5/PIF1/CCT5/NABP2/CCT6A/CCT3/POLA2/SIRT6/PRKDC/MAPK3/DK BIRC3/IRAK1/RELB/IL18/TMSB4X/HDAC7/PSMB9/TRAF2/RBCK1/PSMD14/PRDX1/CARD10/NFKB2/ F2BP1/EXOSC4/IGF2BP3/PSMB9/PSMD14/YBX3/MAPKAPK2/PCBP4/PSMD2/HSPA8/NPM1/YBX1/PAB 1/LGALS3/DAB2/MMP14/TGFB1/ITGAM/GPC4/STX3/SQSTM1/YWHAZ/GPC3/ITGB2/KCNJ11/SLC7A1 5/CDC6/ANLN/STMN1/CDC25B/PRC1/KIF23/ECT2/NUSAP1/AURKA/UNC119/RACGAP1/NUP62/GIT1 /MCM4/ORC6/CCNE1/RFC4/ORC1/RAD51/TONSL/RNASEH2A/MCM6/FEN1/DSCC1/GINS2/MCM10/POL /TACC3/TRIP13/CDCA5/CDC6/PKMYT1/NDC80/ANLN/NEK2/BUB1/DLGAP5/BUB1B/MKI67/CENPF/N FNA3/ROB01/SYK/S100A8/ASPH/CASP4/IFT57/HSF1/CARD9/TRAF2/PSMD14/BAX/BEX3/PERP/PR 3/SYK/TMSB4X/CASP4/TNFRSF11B/PSMB9/LTB/TNFRSF18/TRAF2/RBCK1/PSMD14/TNFSF9/PSMD2 K2/FLNA/BIRC3/IRAK1/ZDHHC13/CD74/NUP62/CARD9/TRAF2/RBCK1/HMOX1/RHOC/TRAF5/FKBP1 DC80/CDC45/DLGAP5/CDC25B/CCNE1/NUSAP1/TGFB1/RCC2/AURKA/CDC25C/DTL/EIF4EBP1/SMAR X2/ALYREF/IGF2BP3/HSF1/EIF5A2/NUTF2/NUP210/UPF3B/ZC3H3/NUP93/NXT1/NUP205/NUP37/ /TACC3/TRIP13/CDCA5/CDC6/PKMYT1/NDC80/ANLN/NEK2/BUB1/DLGAP5/BUB1B/MKI67/LIF/CEN E1/AURKA/GPNMB/CDC25C/CDKN2A/PLCB1/GTSE1/EZH2/CDK4/MUC1/CDKN2D/ZNF385A/ARID3A/P /AURKB/TACC3/CDCA8/TRIP13/CDCA5/CDC6/NUF2/NDC80/NCAPG/NEK2/BUB1/DLGAP5/BUB1B/PR AD51/EXO1/FEN1/POLD1/SMG5/PIF1/CCT5/NABP2/CCT6A/CCT3/POLA2/SIRT6/PRKDC/MAPK3/DK 3/FZD6/DLG3/FZD7/PSMB9/PSMD14/MSN/BRK1/PTK7/PSMD2/FZD1/LAMA5/MLLT3/ARHGEF19/PS 1/TRAIP/RIPK2/GSTP1/BIRC3/IRAK1/CD74/ROB01/SYK/CASP4/IFNGR2/SCRIB/TRAF2/RBCK1/T N2/COR01A/COTL1/PRKCD/NCK2/BAIAP2L2/VASP/CDC42EP1/HCK/TMSB4X/TWF2/CARMIL1/PLEKH 6/CDK1/CDC45/ORC1/AURKA/CDC25C/DTL/GTSE1/MUC1/EME1/ZNF385A/ARID3A/CHEK1/RHNO1/P ZD7/PSMB9/PSMD14/PTK7/PSMD2/FZD1/MLLT3/ARHGEF19/PLCB3/CSNK1E/PSMB2/LEF1/SFRP5/P GALS3/RAC2/TGFB1/GPNMB/RIPK2/HAVCR2/COR01A/CCDC88B/NCK2/PRNP/SYK/IL18/VTN1/TFR

E1/AURKA/GPNMB/CDC25C/CDKN2A/PLCB1/GTSE1/EZH2/CDK4/MUC1/CDKN2D/ZNF385A/ARID3A/P  
D44/CD74/ARHGEF2/BCL2A1/HSPB1/NCK2/S100A8/MUC1/CDKN2D/ZNF385A/CREB3L1/DDIT3/YBX  
P2A/TRIP13/E2F1/CDC6/CDK1/NDC80/BUB1/BUB1B/ZWINT/CENPF/ORC1/TTK/TGFB1/AURKA/CDC  
/CDC25B/BUB1B/CKS2/CCNE1/LIF/P3H4/TTK/RAD51/AURKA/RAD54L/NCAPH/FANCD2/PLCB1/C11  
APK2/HSPA6/NUP210/MAPK3/HSPA8/SLC52A3/HSP90AB1/NUP93/NUP205/NUP37/NDC1/NUP188/M  
/COR01A/CLCF1/CD74/CCDC88B/NCK2/SYK/IL18/VTCN1/CD320/TFRC/HLA-DPA1/HLA-DMB/JAK3  
25A6/MICALL2/DDIT3/SAE1/BAX/TOMM34/GDAP1/TIMM17B/BMF/BID/TOMM5/UBE2J2/NPEPPS/HS  
25C/DTL/GTSE1/MUC1/EME1/ZNF385A/ARID3A/CHEK1/RHNO1/PRMT1/BAX/PCBP4/CASP2/BRSK1/  
AVCR2/COR01A/CLCF1/CD74/CCDC88B/NCK2/SYK/IL18/VTCN1/CD320/TFRC/HLA-DPA1/HLA-DMB  
G1/AURKA/CDC25C/DTL/CD44/CD74/BATF/GTSE1/EEF1E1/MUC1/ANKRD1/ZNF385A/ARID3A/CHEK  
S100A14/TGFB1/STX3/CD74/P2RX4/HSPB1/STK39/PGF/TMSB4X/CCL5/CXCR4/CCL26/CREB3/MAP  
1/UPF3B/RRS1/NUP93/NXT1/NUP205/NUP37/RNPS1/NDC1/NUP188/NCBP2/U2AF2/SRSF9/XPOT/S  
FB1/FOLR1/VASP/FZD6/SCRIB/IFT57/CFL1/HNF1B/MTHFD1L/PTK7/STIL/HIF1A/FZD1/ST14/IF  
5/FCER1G/LGALS3/RAC2/CSF1/S100A14/ITGB2/CD74/SLAMF8/SYK/CKLF/S100A8/CSF3R/CCL5/  
B/TPX2/CENPA/TACC3/NUF2/NDC80/NEK2/STMN1/PRC1/KIF23/WDR62/KIFC1/SAPCD2/MISP/NUS  
FB1/FOLR1/VASP/FZD6/SCRIB/IFT57/CFL1/HNF1B/MTHFD1L/PTK7/STIL/HIF1A/FZD1/ST14/IF  
1/UPF3B/RRS1/NUP93/NXT1/NUP205/NUP37/RNPS1/NDC1/NUP188/NCBP2/U2AF2/SRSF9/XPOT/S  
AVCR2/COR01A/CLCF1/CD74/CCDC88B/NCK2/SYK/IL18/VTCN1/CD320/TFRC/HLA-DPA1/HLA-DMB  
RPL36A/SEC61G/RPS2/BCAP31/RPL17/RPLP2/TRAM1L1/RPSA/KDEL1/RPS5/RPS21/RPL7/RPL28  
1/UPF3B/RRS1/NUP93/NXT1/NUP205/NUP37/RNPS1/NDC1/NUP188/NCBP2/U2AF2/SRSF9/XPOT/S  
25A6/MICALL2/DDIT3/SAE1/BAX/TOMM34/GDAP1/TIMM17B/BMF/BID/TOMM5/UBE2J2/NPEPPS/HS  
/TOP2A/TRIP13/NDC80/MCM2/BUB1/BUB1B/SRC/CENPF/TTK/SPI1/PIF1/MAD2L1/DNMT1/ESPL1/  
DLG3/FZD7/PSMB9/PSMD14/BRSK1/PTK7/PSMD2/FZD1/MLLT3/ARHGEF19/PSMB2/PSME3/DVL3/PL  
S9/VEGFB/LGALS3/RAC2/MMP14/CSF1/S100A14/TGFB1/CD74/PTAFR/P2RX4/STK39/PGF/TNFRSF  
DLG3/FZD7/PSMB9/PSMD14/BRSK1/PTK7/PSMD2/FZD1/MLLT3/ARHGEF19/PSMB2/PSME3/DVL3/PL  
/RAD54L/MCM6/FEN1/GINS2/MCM7/MCM3/RAD51AP1/CDC7/CHEK1/RHNO1/NABP2/MCM5/AP5Z1/PS  
SP/ARHGEF2/MAD2L1/SCRIB/CFL1/FSCN1/MAP2/FLOT2/MSN/BRSK1/PTK7/PAK1/HSP90AB1/SPDL  
9/ASF1B/CDK1/HJURP/NCAPG/MCM2/CHAF1B/NUSAP1/CENPH/NCAPD2/CDKN2A/CENPW/NCAPH/OIP  
/RAD54L/MCM6/FEN1/GINS2/MCM7/MCM3/RAD51AP1/CDC7/CHEK1/NABP2/MCM5/AP5Z1/PSMD14/S  
PS6KA1/HSF1/PSMB9/DDIT3/PSMD14/HMOX1/PSMD2/RGS14/HIF1A/E2F4/PSMB2/PSME3/MT3/ATF  
3B/RPS2/PABPC1/RNPS1/NCBP2/RPL17/RPLP2/RPSA/RPS5/RPS21/RPL7/RPL28/RPL39/RPL35A/  
SF1/PSMB9/DDIT3/PSMD14/HMOX1/PSMD2/HIF1A/E2F4/PSMB2/PSME3/MT3/ATF4/PSMB4/PSMB8/  
5/FCER1G/LGALS3/RAC2/CSF1/S100A14/ITGB2/CD74/SYK/CKLF/S100A8/CSF3R/CCL5/VAV1/CC  
4/RFC4/RAD51/RAD54L/MCM6/DSCC1/GINS2/MCM7/PIF1/MCM3/HMGB3/MCM5/HMGB2/GINS4/RUVB  
ZB1/CLCF1/CD74/PKN1/SLAMF8/IGLL5/SYK/HMGB3/CD320/TFRC/MIF/CD300A/MAD2L2/IL27RA/  
5/FCER1G/LGALS3/RAC2/ITGB2/CD74/SLAMF8/SYK/CKLF/S100A8/CSF3R/CCL5/VAV1/CCL26/JA  
ALS3/DAB2/MMP14/SAPCD2/MISP/TGFB1/GPC4/STX3/SQSTM1/KCNJ11/PRNP/HRAS/EZR/RHOG/AN  
UP93/NXT1/NUP205/NUP37/RNPS1/NDC1/NUP188/NCBP2/U2AF2/SRSF9/AKAP8L/CPSF1/THOC5/N  
1/SKA3/TUBG1/ARHGEF2/TRIM54/MAPRE1/MID1IP1/KIF18A/NCKAP5L/MAP2/MAP1S/PAK1/TPPP3  
UP93/NXT1/NUP205/NUP37/RNPS1/NDC1/NUP188/NCBP2/U2AF2/SRSF9/AKAP8L/CPSF1/THOC5/N  
RPL17/RPLP2/TRAM1L1/RPSA/RPS5/RPS21/RPL7/RPL28/RAB10/RPL39/RPL35A/RPS3/RPL27/SS  
FZD7/PSMB9/PSMD14/PTK7/PSMD2/FZD1/MLLT3/ARHGEF19/PSMB2/PSME3/DVL3/PLEKHA4/FZD2/  
C1/CARD9/PSMB9/PSMD14/PSMD2/PAK1/PSMB2/PSME3/CD209/LYN/CARD11/MUC3A/PSMB4/PSMB8  
/CHAF1B/CENPH/CDKN2A/CENPW/SMARCD3/OIP5/NAP1L1/CENPO/CENPU/SMARCD1/CENPL/HMGB2/  
/CHAF1B/CENPH/CENPW/SMARCD3/OIP5/NAP1L1/CENPO/CENPU/SMARCD1/CENPL/HMGB2/RUVBL1/  
C25C/CDKN2A/GTSE1/EZH2/CDK4/MUC1/CDKN2D/ZNF385A/ARID3A/PRMT1/BAX/PCBP4/CASP2/PR  
/HRAS/CDC7/CACYBP/GMNN/CHTF18/PPP2R1A/PCNA/TICRR/E2F8/RFC2/FGFR1/BLM/FBXO5/DBF4  
B/TPX2/TACC3/NUF2/NDC80/NEK2/STMN1/PRC1/KIF23/WDR62/KIFC1/MISP/TTK/AURKA/PSRC1/  
RKA/CDC25C/CD44/CD74/BATF/GTSE1/EEF1E1/MUC1/ANKRD1/ZNF385A/ARID3A/PRMT1/BAX/MIF  
C1/CARD9/PSMB9/PSMD14/PSMD2/PAK1/PSMB2/PSME3/CD209/LYN/CARD11/MUC3A/PSMB4/PSMB8  
RPL17/RPLP2/TRAM1L1/RPSA/RPS5/RPS21/RPL7/RPL28/RPL39/RPL35A/RPS3/RPL27/SSR3/RPL

MB9/PSMD14/PTK7/PSMD2/FZD1/MLLT3/ARHGEF19/PSMB2/PSME3/DVL3/PLEKHA4/FZD2/RAC1/PSRKA/CDC25C/GTSE1/CDK4/MUC1/ZNF385A/ARID3A/PRMT1/BAX/MIF/PCBP4/CASP2/CNOT11/BRCA1/IF23/CTSV/HLA-DMA/RACGAP1/CD74/KLC2/HLA-DRB1/HLA-DQA1/KIF11/HLA-DRA/HLA-DQB1/IFAM/RCC2/FLNA/ITGB2/FERMT3/ITGAV/PLEK/ADAM9/SYK/HCK/ZYX/NME2/ADAM15/COL16A1/COL35/FCER1G/LGALS3/RAC2/ITGB2/CD74/SYK/CKLF/S100A8/CSF3R/CCL5/VAV1/CCL26/JAML/C3AR1/AURKA/CDC25C/GTSE1/MUC1/EME1/ZNF385A/ARID3A/PRMT1/BAX/PCBP4/CASP2/BRSK1/PRKDC/NEK2/KIF23/KIFC1/MISP/AURKA/FLNA/RACGAP1/CENPW/KIF11/RCC1/SPAG5/MAPRE1/TUBB/AS/TACC3/TRIP13/CDCA5/CDC6/NDC80/NEK2/BUB1/DLGAP5/BUB1B/MKI67/CENPF/RMI2/ECT2/TTK/C25C/CDKN2A/GTSE1/EZH2/CDK4/MUC1/CDKN2D/ZNF385A/ARID3A/PRMT1/BAX/PCBP4/CASP2/PRIF23/CTSV/HLA-DMA/RACGAP1/CD74/KLC2/HLA-DRB1/HLA-DQA1/KIF11/HLA-DRA/HLA-DQB1/IFP2/TRAM1L1/RPSA/RPS5/RPS21/RPL7/RPL28/RPL39/RPL35A/RPS3/RPL27/SSR3/RPL35/RPS20/VASP/FZD6/SCRIB/IFT57/CFL1/MTHFD1L/PTK7/STIL/HIF1A/FZD1/ST14/DVL3/FZD2/TULP3/DE-DMA/RACGAP1/CD74/KLC2/HLA-DRB1/HLA-DQA1/KIF11/HLA-DRA/HLA-DQB1/IFI30/KIF3C/KIFOMM34/GDAP1/TIMM17B/BID/TOMM5/UBE2J2/NPEPPS/HSPA4/UBE2L3/GSK3A/BAG3/GRPEL2/TIMMK1/PSMB9/PSMD14/BRSK1/MIIP/PSMD2/CHMP4C/BRCA1/TICRR/PSMB2/PSME3/BLM/PSMB4/PSMB8SRC/CKS2/CCNE1/CCNA2/CCNF/PSRC1/CDC25C/CDKN2A/CDC25A/CDK4/CDKN2D/CKS1B/HSP90AB1PL36A/FTSJ1/EIF2S2/TICRR/RPL17/EIF3D/RPSA/RPS21/EIF3I/EIF2S3/DENR/RPL39/RPL35A/FI30/NCF1/PSMB9/PSMD14/PSMD2/HLA-A/ITGB5/PSMB2/PSME3/BCAP31/ERAP2/PSMB4/PSMB8/PAM1L1/RPSA/RPS5/RPS21/RPL7/RPL28/RPL39/RPL35A/RPS3/RPL27/SSR3/RPL35/RPS20/RPL18IAP2L2/VASP/CDC42EP1/HCK/CARMIL1/CCL26/ARPC4/BAIAP2L1/FCHSD1/BIN1/ARPC2/ARPC3/CEI1/TUBB/TUBB4B/TCTN2/SSNA1/PPP2R1A/TUBA1A/SFI1/DYNLL1/DYNC1H1/CSNK1E/CEP89/HAUSSRC/CKS2/CCNE1/CCNA2/CCNF/PSRC1/CDC25C/CDKN2A/CDC25A/CDK4/CDKN2D/CKS1B/CCNO/BLM01A/CCDC88B/NCK2/SYK/IL18/VTCN1/TFRC/HLA-DPA1/HLA-DMB/JAK3/CCL5/CD86/TNFSF9/ZP3K2/ITGAV/PGF/NCF4/SH2D2A/NCF1/WASF2/MAPKAPK2/VAV1/ITGA5/HIF1A/HGS/MT3/NCKAP1L/RP1/NUP62/NCF1/AREG/DOK1/RHBDF1/HGS/TGFA/HIP1R/SH3KBP1/CNOT9/SHC1/EPS15L1/MVB12A/CDC25B/CCNE1/TGFB1/RCC2/CDC25C/DTL/SMARCD3/PLCB1/EZH2/CDC25A/CDK4/CDC7/ESPL1/F1/PRKCD/CD320/TFRC/BAX/MIF/CD300A/SASH3/TNFRSF4/SLC39A10/MNDA/CTLA4/LEF1/NCKAP1TSE1/MUC1/EME1/ZNF385A/ARID3A/PRMT1/BAX/PCBP4/CASP2/BRSK1/PRKDC/CNOT11/PCNA/E2FIRC3/CD44/CDKN2D/RPS6KA1/BEX3/TNFAIP8/RNF34/BCL2L12/NOL3/LEF1/MT3/LAMP3/NLE1/BIF2/BCL2A1/HSPB1/MUC1/CDKN2D/ZNF385A/CREB3L1/YBX3/MIF/CREB3/HIF1A/BCL2L12/NOL3/HACOROA/CD74/PKN1/SLC7A11/JAK3/BAX/MIF/HIF1A/TCIRG1/SH2B2/NCKAP1L/PIK3CD/PMAIPKLC2/KIF11/KIF3C/KIF18A/RAB6B/CENPE/COPE/TMED9/ARF3/ARFGAP1/KDELRL1/KIF15/COPZ1/RAS/GIT1/ARPC4/EFNA5/EFNB1/PAK1/MMP2/EPHB6/ARPC2/PSENEN/ARPC3/EPHB3/ACTG1/LYN/R/TOP2A/TRIP13/CDC6/NDC80/BUB1/DLGAP5/BUB1B/CENPF/TTK/NCAPD2/NCAPH/MAD2L1/EME1/E/BRSK1/MIIP/PSMD2/CHMP4C/BRCA1/TICRR/PSMB2/PSME3/BLM/PSMB4/PSMB8/PSMB10/PSMA5/P/TGFB1/CTSV/CD44/DDR1/ADAM15/BSG/LAMC1/MMP1/FSCN1/CTSK/TIMP2/SH3PXD2B/LCP1/MMP1/BUB1B/AURKA/MAD2L1/PSMB9/PSMD14/PSMD2/PSMB2/PSME3/FBXO5/ANAPC7/CDK2/PSMB4/PSMB/TRIP13/CDCA5/CDC6/NDC80/BUB1/DLGAP5/BUB1B/CENPF/RMI2/TTK/FEN1/MAD2L1/ESPL1/LCMC25C/GTSE1/MUC1/ZNF385A/ARID3A/PRMT1/BAX/PCBP4/CASP2/CNOT11/BRCA1/PCNA/E2F8/E2FIRC3/CD44/CDKN2D/RPS6KA1/BEX3/TNFAIP8/RNF34/BCL2L12/NOL3/LEF1/MT3/LAMP3/NLE1/BIK/HCK/WIPF3/WASF2/VAV1/ARPC4/MAPK3/PAK1/HSP90AB1/ARPC2/ARPC3/WIPF1/ACTG1/NCKAP1K/HCK/WIPF3/WASF2/VAV1/ARPC4/MAPK3/PAK1/HSP90AB1/ARPC2/ARPC3/WIPF1/ACTG1/NCKAP1/CCNE1/P3H4/TTK/NCAPH/FANCD2/EME1/ESPL1/SGO2/PPP2R1A/SGO1/NDC1/SMC4/NCAPH2MAPK3/HSPA8/HSP90AB1/NUP93/NUP205/NUP37/NDC1/NUP188/MLST8/HSPH1/FKBP4/CHORDC1/N5/CCT6A/CCT3/MAPK3/DKC1/ACD/CCT2/HSP90AB1/CCT4/PNKP/NHP2/CCT7/TCP1/PARP1/TELO2/PINE2/CSF1/TGFB1/CLCF1/P2RX4/CXCR4/IL34/BIN1/HDAC1/HDAC2/LYN/IL1B/PPP1CC/PRKCI/CHAF1B/CENPH/CDKN2A/CENPW/OIP5/NAP1L1/CENPO/CENPU/CENPL/HMGB2/SIRT6/RUVBL1/NPM3/ECT2/AURKA/RACGAP1/NUP62/GIT1/GIPC1/CHMP4C/MY019/E2F8/INCENP/KIF14/RAB11FIP4/TTK/RCC2/CCT5/EZH2/NABP2/CCT6A/CCT3/DKC1/ACD/CCT2/SPDL1/CCT4/CCT7/TCP1/MSH2/RUVFI30/NCF1/PSMB9/PSMD14/PSMD2/HLA-A/ITGB5/PSMB2/PSME3/PSMB4/PSMB8/PSMB10/PSMA5/PCM6/FEN1/POLD1/MCM7/MCM3/CDC7/MCM5/POLA2/GMNN/PCNA/E2F8/RFC2/FGFR1/FBXO5/DBF4/L

/DLGAP5/CENPF/KIFC1/PSRC1/NUP62/SPAG5/KIF18A/CHMP4B/FAM83D/CENPE/CHMP4C/DYNC1H1  
5/ANLN/STMN1/KIF23/ECT2/NUSAP1/UNC119/RACGAP1/NUP62/CFL1/CHMP4B/RHOC/ESPL1/CHMP  
25C/DTL/GTSE1/MUC1/ZNF385A/ARID3A/CHEK1/PRMT1/BAX/PCBP4/CASP2/PRKDC/CNOT11/BRCA  
25C/DTL/GTSE1/MUC1/ZNF385A/ARID3A/CHEK1/PRMT1/BAX/PCBP4/CASP2/PRKDC/CNOT11/BRCA  
/CDC25B/CCNE1/TGFB1/RCC2/CDC25C/DTL/SMARCD3/PLCB1/CDC25A/CDK4/CDC7/ESPL1/NSMCE2  
IPF3/WASF2/VAV1/ARPC4/MAPK3/PAK1/HSP90AB1/ARPC2/ARPC3/WIPF1/ACTG1/NCKAP1L/MYO1G  
A/CCT3/MAPK3/DKC1/ACD/CCT2/HSP90AB1/PPIA/CCT4/PNKP/NHP2/CCT7/TCP1/TELO2/CCT8/PT  
2/CCT6A/CCT3/SIRT6/MAPK3/DKC1/ACD/CCT2/CCT4/PNKP/CCT7/TCP1/PML/PARP1/CCT8/GNL3/  
IPF3/WASF2/VAV1/ARPC4/MAPK3/PAK1/HSP90AB1/ARPC2/ARPC3/WIPF1/ACTG1/NCKAP1L/MYO1G  
C2L/GTPBP4/NHP2/NLE1/RPL10L/RPL7/RPL35A/SNU13/FTSJ3/RPL35/PPAN/RPLP0/LAS1L/RPL3  
X1/PDIA2/NCF4/GSR/NCF1/DDIT3/PRDX1/PTGES2/SLC11A1/GLRX3/TXN/ER01A/GPX1/DNAJC10/  
/DLGAP5/CENPF/KIFC1/PSRC1/NUP62/SPAG5/KIF18A/CHMP4B/FAM83D/CENPE/CHMP4C/DYNC1H1  
D74/PKN1/JAK3/CCL5/BAX/MIF/HIF1A/SLC39A10/PRELID1/PDCD1/NOC2L/ADAM8/KDELRL1/LYN/  
25C/DTL/GTSE1/MUC1/ZNF385A/ARID3A/CHEK1/PRMT1/BAX/PCBP4/CASP2/PRKDC/CNOT11/BRCA  
6A/CCT3/CHTF18/MAPK3/DKC1/ACD/FGFR4/CCT2/HSP90AB1/RFC2/CCT4/PNKP/CCT7/TCP1/PRKD  
/STMN1/KIF23/ECT2/NUSAP1/UNC119/RACGAP1/NUP62/CFL1/CHMP4B/RHOC/ESPL1/CHMP4C/LZT  
B9/PSMD14/PSMD2/HLA-A/ITGB5/PSMB2/PSME3/PSMB4/PSMB8/PSMB10/PSMA5/PSMD13/PSMC4/P  
/CCT3/MSN/ZP3/CCT2/UBAP2L/CCT4/CCT7/CD209/TCP1/FUT3/FOLR2/SPESP1/CD6/CCT8/HVCN1  
0/CENPU/CENPL/RUVBL1/VPS72/CHD3/NPM1/SMARCA4/ACTL6A/HDAC1/ITGB3BP/HDAC2/NASP/AC  
/MIF/MAD2L2/BCL2L12/PARPBP/DDIAS/BID/OTUB1/FBXO5/AUNIP/KDM1A/TAF9/THOC5/PSMD10/  
TGAM/CYBB/GSTP1/ITGB2/SOD3/PRKCD/ACP5/SYK/NCF4/NCF1/PRDX1/SH3PXD2B/DUOX2/F2RL1/  
/TRIP13/CDC6/NDC80/BUB1/DLGAP5/BUB1B/CENPF/TTK/MAD2L1/ESPL1/LCMT1/NAA10/MAD2L2/  
1/CD320/TFRC/MIF/CD300A/SASH3/TNFRSF4/SLC39A10/MNDA/CTLA4/NCKAP1L/LYN/CARD11/TN  
TSE1/MUC1/ZNF385A/ARID3A/PRMT1/BAX/PCBP4/CASP2/PRKDC/CNOT11/PCNA/E2F8/E2F4/CNOT  
AC7/EZR/VTCN1/CARD9/VSIG4/traf2/CD86/CD3E/SASH3/CD83/LAG3/SLC11A1/CARD11/IL1B/R  
PSA/NLE1/RPL10L/RPS5/VCX/PPAN/RPS19/RPLP0/RRP7BP/RPL38/RPL23A/MRPS7/traf7/MPV17  
TSE1/MUC1/ZNF385A/ARID3A/PRMT1/BAX/PCBP4/CASP2/PRKDC/CNOT11/PCNA/E2F8/E2F4/CNOT  
/UNC13D/HMOX1/CD300A/STXB2/PIK3CD/PLSCR1/LYN/S100A13/FGR/LCP2/CD300LF/IL4R/BTK  
/TRIP13/CDC6/NDC80/BUB1/DLGAP5/BUB1B/CENPF/TTK/MAD2L1/ESPL1/LCMT1/MAD2L2/CENPE/  
/TRIP13/CDC6/NDC80/BUB1/DLGAP5/BUB1B/CENPF/TTK/MAD2L1/ESPL1/LCMT1/MAD2L2/CENPE/  
/PKN1/JAK3/BAX/MIF/HIF1A/TCIRG1/SH2B2/NCKAP1L/PMAIP1/LYN/IL2RA/TNFSF13B/SIT1/FA  
B/CENPH/CENPW/OIP5/NAP1L1/CENPO/CENPU/CENPL/HMGB2/RUVBL1/NPM1/CHAF1A/ITGB3BP/NA  
A/CCT3/MAPK3/DKC1/ACD/CCT2/HSP90AB1/CCT4/PNKP/NHP2/CCT7/TCP1/TELO2/CCT8/PTGES3/  
CM6/FEN1/POLD1/MCM7/MCM3/CDC7/MCM5/POLA2/GMNN/PCNA/RFC2/FGFR1/DBF4/LIG1/PRIM1/D  
TSE1/MUC1/ZNF385A/ARID3A/PRMT1/BAX/PCBP4/CASP2/PRKDC/CNOT11/PCNA/E2F8/E2F4/CNOT  
1/CHMP4B/STIL/NPM1/CHMP4C/BRCA1/XRCC3/CEP85/CHORDC1/POC1A/CHMP3/PLK4/KAT2A/CHMP  
/CENPF/KIFC1/PSRC1/NUP62/SPAG5/KIF18A/CHMP4B/FAM83D/CENPE/CHMP4C/DYNC1H1/SPDL1/  
3/NDC80/BUB1/BUB1B/LIF/CENPF/TTK/MAD2L1/CHEK1/LCMT1/NAA10/MAD2L2/SPDL1/XRCC3/FB  
A/CCT3/MAPK3/DKC1/ACD/CCT2/CCT4/PNKP/CCT7/TCP1/PARP1/CCT8/NAT10/HNRNPU/EXOSC10/  
/TRIP13/CDC6/NDC80/BUB1/DLGAP5/BUB1B/CENPF/TTK/MAD2L1/ESPL1/LCMT1/MAD2L2/CENPE/  
3/CDC6/NDC80/BUB1/DLGAP5/BUB1B/CENPF/TTK/MAD2L1/ESPL1/LCMT1/MAD2L2/CENPE/NSMCE2  
TSE1/MUC1/ZNF385A/ARID3A/PRMT1/BAX/PCBP4/CASP2/PRKDC/CNOT11/PCNA/E2F8/E2F4/CNOT  
TSE1/MUC1/ZNF385A/ARID3A/PRMT1/BAX/PCBP4/CASP2/PRKDC/CNOT11/PCNA/E2F8/E2F4/CNOT  
TSE1/MUC1/ZNF385A/ARID3A/PRMT1/BAX/PCBP4/CASP2/PRKDC/CNOT11/PCNA/E2F8/E2F4/CNOT  
G5/MAPRE1/FAM83D/STIL/SNX10/RTKN/CSNK1D/DCTN2/FAM83H/CEP250/NSFL1C/BICD1/HNRNPU  
TSE1/MUC1/ZNF385A/ARID3A/PRMT1/BAX/PCBP4/CASP2/PRKDC/CNOT11/PCNA/E2F8/E2F4/CNOT  
TSE1/MUC1/ZNF385A/ARID3A/PRMT1/BAX/PCBP4/CASP2/PRKDC/CNOT11/PCNA/E2F8/E2F4/CNOT  
TSE1/MUC1/ZNF385A/ARID3A/PRMT1/BAX/PCBP4/CASP2/CNOT11/PCNA/E2F8/E2F4/CNOT9/CDK2  
3/CDC6/NDC80/BUB1/DLGAP5/BUB1B/CENPF/TTK/MAD2L1/ESPL1/LCMT1/MAD2L2/CENPE/NSMCE2  
/CD109/CD53/FLOT1/EHD1/CXCL9/EHD2/ADAM12/VASH2/MYOF/SBNO2/IL4R  
0BP/PRKCD/SYK/JAK3/SASH3/ISG15/F2RL1/CD83/BCL3/CD47/CLEC7A/HSPD1/FCGR2B/TUSC2/I

/NEK2/KIF23/KIFC1/MISP/FLNA/RACGAP1/KIF11/CHMP4B/CHMP4C/MSTO1/KPNB1/KIF2A/ZNF20  
/NDC80/BUB1/DLGAP5/BUB1B/CENPF/TTK/MAD2L1/ESPL1/LCMT1/MAD2L2/CENPE/NSMCE2/SPDL1  
/CD109/CD53/FLOT1/EHD1/CXCL9/EHD2/ADAM12/VASH2/MYOF/SBNO2/IL4R  
/NDC80/BUB1/DLGAP5/BUB1B/CENPF/TTK/MAD2L1/ESPL1/LCMT1/MAD2L2/CENPE/NSMCE2/SPDL1  
3/NDC80/BUB1/BUB1B/CENPF/TTK/MAD2L1/CHEK1/LCMT1/NAA10/MAD2L2/SPDL1/XRCC3/FBX05/  
/CD109/CD53/FLOT1/EHD1/CXCL9/EHD2/ADAM12/VASH2/MYOF/SBNO2/IL4R  
13D/ZP3/RAB15/STX1A/F2RL1/CDK5/FGR/IL4R/SYT1/DNM1L/STX4/RAB3D/VAMP8/CD177/RAB3A  
D/HMOX1/CD300A/STXBP2/SPON2/PIK3CD/LYN/S100A13/FGR/IL4R/BTK/CBL/VAMP8/MILR1/C12  
D/HMOX1/CD300A/STXBP2/PIK3CD/LYN/S100A13/FGR/IL4R/BTK/CBL/VAMP8/MILR1/C12orf4/S  
BCD1/ELOVL1/AKR1C3/ALOX5/FADS3/MIF/PTGES2/DEGS1/PTGS1/SCD5/IL1B/TBXAS1/FADS1/HP  
FMNL1/RHOQ/EPB41L2/WIPF3/TIGD5/WIPF1/NCKAP1L/RTKN/EHD2/CDK5/WAS/VIL1/CIT/LLGL1/  
FAAP24/FANCG/FANCE/XRCC3/FANCA/USP1/MCM8/RFD3/RPA2/RAD51D/DCLRE1B/FAAP20/RPS27  
2/TGFB1/CD74/CDK4/SIRT6/MIF/PRKDC  
GEF2/MAD2L1/ASPM/ESPL1/DYNC1H1/SPDL1/DYNLT1/GPSM2/KPNB1/MAP4/LLGL1/ACTL8/NDE1/N  
/BSG/TRIM28/MMP2/PPARD/ARHGDI1/FKBP4/IL1B/CALCA/SYDE1/AGO2/CALR  
4/HCLS1/PARP1/IL15/CDC42/APP/FADD/PTPN2/CASP8/VEGFA/TLR2/INHA  
3/NDC80/BUB1/BUB1B/CENPF/TTK/MAD2L1/ESPL1/LCMT1/NAA10/MAD2L2/SPDL1/XRCC3/FBX05  
D/HMOX1/CD300A/STXBP2/PIK3CD/LYN/S100A13/FGR/IL4R/BTK/CBL/VAMP8/MILR1/C12orf4/S  
GEF2/MAD2L1/ESPL1/DYNC1H1/SPDL1/DYNLT1/GPSM2/KPNB1/MAP4/LLGL1/ACTL8/NDE1/NSFL1C  
L1/PLCB1/CCL5/CREB3/MAPK3/SERPINE1/C3AR1/LYN/PLA2G7/CCR1/C5AR1/CMKLR1/S100A7/CX  
/KIFC1/PSRC1/NUP62/KIF18A/CHMP4B/CENPE/CHMP4C/SPDL1/RRS1/KIF14/KPNB1  
3/NDC80/BUB1/BUB1B/CENPF/TTK/MAD2L1/ESPL1/LCMT1/NAA10/MAD2L2/SPDL1/XRCC3/FBX05  
K/UNC13D/HMOX1/CD300A/STXBP2/F2RL1/LYN/FGR/ABR/IL4R/STX4/FCGR2B/VAMP8/C12orf4/C  
FMNL1/RHOQ/EPB41L2/WIPF3/TIGD5/WIPF1/NCKAP1L/RTKN/EHD2/CDK5/WAS/VIL1/CIT/LLGL1/  
0/CENPU/CENPL/RUVBL1/NPM1/ITGB3BP/NASP/CENPI/CENPK/RBBP4/HELLS/CENPN/RBBP7/CENP  
00A/STXBP2/LYN/FGR/IL4R/VAMP8/C12orf4/STXBP1/ADORA2B/IL13RA2/CD84  
0/CENPU/CENPL/RUVBL1/VPS72/NPM1/ITGB3BP/NASP/CENPI/CENPK/RBBP4/CENPN/RBBP7/CENP  
IRF1/CTLA4/PLA2G2D/LAG3/FANCA/CBFB/IL2RA/DROSHA/KAT2A/LILRB4/BTN2A2  
D3/CDC25A/CDK4/CDC7/NPM1/FBX05/APP/DBF4B/RAD51C/HSPA2/MTA3/RAB11A/MECP2  
ECT2/RCC2/RACGAP1/SPAG5/CENPE/SGO1/KNSTRN/CDC42/ZNF207  
00A/STXBP2/PLSCR1/LYN/FGR/CD300LF/IL4R/VAMP8/MILR1/C12orf4/STXBP1/ADORA2B/IL13R  
3/NDC80/BUB1/BUB1B/CENPF/TTK/MAD2L1/LCMT1/NAA10/MAD2L2/SPDL1/XRCC3/FBX05  
5/CENPO/CENPU/CENPL/RUVBL1/CENPE/NPM1/ITGB3BP/NASP/CENPI/CENPK/RBBP4/HELLS/RNF4  
4/CD52/GRN/NCF1/PIK3CD/SLC11A1/RAC1/JCHAIN/RPS19/CLEC7A/LBP  
3/NDC80/BUB1/BUB1B/CENPF/TTK/MAD2L1/LCMT1/MAD2L2/SPDL1/XRCC3/FBX05  
0/CENPU/CENPL/RUVBL1/NPM1/ITGB3BP/NASP/CENPI/CENPK/RBBP4/CENPN/RBBP7/CENPQ/MIS1  
IRF1/CTLA4/LAG3/FANCA/CBFB/IL2RA/DROSHA/KAT2A/LILRB4/BTN2A2  
AP2M1/AP2S1/AP1B1/PAK2/AP2A2/AP1S1/AP1S3/AP1S2/AP2B1/DOCK2/AP2A1/KPNA6/CD247/AR  
0/CENPU/CENPL/RUVBL1/NPM1/ITGB3BP/NASP/CENPI/CENPK/RBBP4/CENPN/RBBP7/CENPQ/MIS1  
3/NDC80/BUB1/BUB1B/CENPF/TTK/MAD2L1/LCMT1/MAD2L2/SPDL1/XRCC3/FBX05  
5/CENPO/CENPU/CENPL/RUVBL1/NPM1/ITGB3BP/NASP/CENPI/CENPK/RBBP4/CABIN1/CENPN/RBB  
STP1/ITGB2/PRKCD/ACP5/SYK/NCF1/DUOX2/F2RL1/AATF  
C1/MCM6/MCM10/MCM7/MCM3/MCM5/POLA2/TICRR/CDK2/PRIM1/POLE4/POLA1/PRIM2  
5/CENPO/CENPU/CENPL/RUVBL1/NPM1/ITGB3BP/NASP/CENPI/CENPK/RBBP4/CABIN1/CENPN/RBB  
GEF2/MAD2L1/ESPL1/SPDL1/DYNLT1/GPSM2/KPNB1/ACTL8/NDE1/NSFL1C/DCTN1  
0/BUB1/BUB1B/CENPF/TTK/MAD2L1/LCMT1/MAD2L2/SPDL1/XRCC3/FBX05/DYNC1LI1/ZNF207/RA  
2L/CCT4/CCT7/TCP1/CCT8/SPA17/VDAC2  
P62/GIPC1/KIF14/CIT/CDC42/CSPP1/KIF20B/RHOA  
0/BUB1/BUB1B/CENPF/TTK/MAD2L1/LCMT1/MAD2L2/SPDL1/XRCC3/FBX05/DYNC1LI1/ZNF207/RA  
KC1/ACD/CCT2/CCT4/PNKP/CCT7/TCP1  
0/BUB1/BUB1B/CENPF/TTK/MAD2L1/LCMT1/MAD2L2/SPDL1/XRCC3



0/BUB1/BUB1B/CENPF/TTK/MAD2L1/LCMT1/MAD2L2/SPDL1/XRCC3  
KC1/ACD/CCT2/CCT4/PNKP/CCT7/TCP1  
0/BUB1/BUB1B/CENPF/TTK/MAD2L1/LCMT1/MAD2L2/SPDL1/XRCC3  
0/BUB1/BUB1B/CENPF/TTK/MAD2L1/LCMT1/MAD2L2/SPDL1/XRCC3  
H/HSF1/PPP2R1A/FBX05/NCAPH2/RAD51C/SPIRE1/MASTL  
D3/CDC25A/CDK4/CDC7/FBX05/APP/DBF4B/RAD51C/HSPA2/MTA3/RAB11A/MECP2  
IF/SLC39A10/NOC2L/LYN  
7/MCM3/GINS3/GINS4/PCNA/LIG1/POLA1/POLD3/DNA2/DCLRE1B/NBN

IL4R/STX4/VAMP8/CD177/HLA-F/STXBP1/ADORA2B

7/MCM3/GINS3/GINS4/PCNA/LIG1/POLA1/POLD3/DNA2

P1/NDE1/NSFL1C

GFR1/LIG1/POLA1

HP2/CCT7/TCP1/RUVBL2/CCT8/NOP10  
/RAD9A/NAE1/TIMELESS/DNA2/CLSPN

C7/MCM5/GINS4  
A

EF16/RAC2/CCNA2/CSF1/ECT2/IQGAP3/RHOV/ARHGAP4/COL1A2/SQSTM1/CDKN2A/TAX1BP3/ARHG  
SPI1/HDAC11/UHRF1/PHF19/PKN1/PRKCD/EZH2/DNMT1/HDAC7/MUC1/CHEK1/PRMT1/YEATS2/BRM  
3BP1/FOXJ1/PLXNA1/RGS10/ARHGEF16/DEPDC1B/ECT2/ARL2/IQGAP3/RCC2/ARHGAP4/AGRN/RAC  
CARD/PKIB/RGS2/TPX2/CDC6/EPO/DUSP9/CDKN3/PKMYT1/CDK1/CDC25B/SRC/MMD/CKS2/RAC2/C  
S2/MDK/TNFRSF21/E2F1/SOX9/EPO/DBN1/CDK1/REG1A/ITM2C/PLXNA1/ITGA3/TSP0/SEMA6A/MM  
/EPO/DBN1/REG1A/PLXNA1/ITGA3/TSP0/SEMA6A/MMD/ETV5/LIF/SERPINE2/CSF1/ECT2/TGFB1/  
/LIMK1/LY96/PGC/TNFRSF21/MMP12/IKBKE/COL1A1/FCER1G/ICAM1/ARPC1B/LGALS9/FOXJ1/TY  
DC6/UBE2S/EPO/DUSP9/CDK1/NEK2/CDC25B/SRC/MMD/CKS2/RFC4/TRIB3/MAGEC2/CSF1/ECT2/T  
T11/ITM2C/VEGFB/GAL3ST1/VCAN/B3GAT3/GAL3ST4/PLCB1/NUDT14/TUSC3/DPM2/MUC1/CHST4/  
K1/MAPK12/SRC/MAPK13/LIF/TTK/TGFB1/AURKA/DKK1/RIPK2/CD44/PKN1/PRKCD/NCK2/SYK/ST  
KE/FCER1G/TYRO3/SRC/S100A14/ITGAM/RIPK2/HAVCR2/BIRC3/ITGB2/IRAK1/PRKCD/RELB/HRA  
/CDCA5/ANXA2/HJURP/NEK2/STMN1/BAK1/SRC/LGALS3/PLAUR/DAB2/LIF/TRIB3/TGFB1/BAMBI/  
ITGB4/ITGA3/KRT23/DSG2/CTSV/DKK1/COL1A2/KRT17/PI3/KRT80/ADAM9/CD109/ELOVL1/FZD6  
R1G/TYRO3/SRC/S100A14/ITGAM/RIPK2/HAVCR2/BIRC3/ITGB2/IRAK1/PRKCD/RELB/HRAS/SYK/  
S9/STMN1/SRC/FLNA/BIRC3/HSPB1/CCT5/UNC13D/EXOSC4/MX2/APOBEC3B/IFNGR2/RNASE6/CFL  
A3/ARHGEF16/LYPD1/LGALS3/DAB2/MMP14/TGFB1/STX3/SQSTM1/FLNA/KCNJ11/TSPAN15/PRNP/  
D74/CSF1R/CFL1/APOBEC3C/TRIM6/CHMP4B/TRIM28/CCL5/CXCR4/TRIM11/SLPI/ISG15/CHMP4C  
TGAM/FLNA/ITGB2/CEP131/PRKCD/B3GAT3/PRNP/HRAS/SYK/MTMR2/GTSE1/SPAG5/EZR/RAN/MIC  
PDA/SRC/NDRG1/CCNA2/STC2/CYBB/IRAK1/EIF4EBP1/ANKRD1/PGK1/PSMB9/PSMD14/HMOX1/SLC  
PDA/SRC/NDRG1/CCNA2/STC2/CYBB/IRAK1/EIF4EBP1/ANKRD1/PGK1/PSMB9/PSMD14/HMOX1/SLC  
2/CSF1/S100A14/TGFB1/GSTP1/STX3/CD74/P2RX4/ROBO1/HSPB1/SLAMF8/PLXNA3/NBL1/STK39

RC/RAC2/RCC2/AGRN/PRKCD/HRAS/CDC42EP1/TWF2/DCDC2/TRPM2/RHOG/PLEK2/RHOQ/FSCN1/WA  
IF/TGFB1/NME1/TMSB4X/MDFI/DDIT3/HMGB2/TRIM6/HMOX1/TRIM28/MAD2L2/ACD/LEF1/BCL3/S  
OLR1/VASP/FZD6/SCRIB/IFT57/CFL1/MTHFD1L/PTK7/STIL/HIF1A/FZD1/ST14/IFT52/DVL3/FZ  
4/RFC4/RAD51/MCM6/DSCC1/GINS2/MCM7/PIF1/MCM3/MCM5/GINS4/RUVBL1/CHTF18/CHD3/ERCC  
E1/P3H4/RAD51/AURKA/CDC25C/RAD54L/FANCD2/CDC25A/C11orf80/EME1/PSMC3IP/ESPL1/MND  
4/CD74/SLAMF8/NBL1/STK39/PGF/CCL5/MIF/CREB3/MAPK3/SERPINE1/ZNF580/C3AR1/F2RL1/N  
RHGEF2/PLEK/TRIM54/ASPH/TWF2/MID1IP1/DNAJC6/KIF18A/CFL1/CARMIL1/NCKAP5L/HSPA8/M  
P1/NUP62/NCF1/AREG/DOK1/RHBDF1/HGS/TGFA/HIP1R/SH3KBP1/CNOT9/SHC1/EPS15L1/MVB12A  
4/CD74/STK39/PGF/CCL5/CREB3/MAPK3/SERPINE1/ZNF580/C3AR1/F2RL1/NCKAP1L/CXCL13/RA  
ASP4/IFT57/TRAF2/BAX/BEX3/HIP1R/BID/BBC3/PMAIP1/F3/LCK/CASP1/PML/HSPE1/FADD/RAC  
PSMB2/PSME3/PSMB4/PSMB8/PSMB10/PSMA5/PSMD13/PSMC4/PSMD10/PSMD11/PSMD1/PSMA7/PSM  
2L/CCT4/CCT7/TCP1/FOLR2/SPESP1/CCT8/HVCN1/SPA17/VDAC2  
2/LEF1/SRI/CPNE1/HDAC2/KDM1A/ZNF593/IFI16/TFAP4/ANKRD33/HEY1/GZMA/ZNF675/MSX1  
A/CCT3/MAPK3/DKC1/ACD/CCT2/CCT4/PNKP/CCT7/TCP1/CCT8/NAT10/HNRNPU/EXOSC10/HNRNPA  
E2F8/RFC2/FGFR1/BLM/FBXO5/DBF4/CDK2/DONSON/TIPIN/TIMELESS/DBF4B/CHEK2/NBN/STOML  
2L1/MAD2L2/RPS2/FBXO5/AXIN1/UBE2L3/DCUN1D5/DNM1L/RPL23/ABL1/RPS7/BAG2/RPL5/MAST  
0BP/SYK/JAK3/SASH3/CD83/BCL3/CD47/CLEC7A/HSPD1/FCGR2B/TUSC2/IL20RB/TLR2/IDO1/XC  
/NDN/ADGRG1/RELN/MBOAT7/CCL2/CDK5/TGFB2/GPR183/CSPG4/CCL3/SRGAP2/HEXB/CDK5R1  
0B/ATP6VOD2/RAB32/ATP6V1C1/TCIRG1/RAB7B/ATP6V1H/RAB20/ATP6V1E1/ATP6VOC/ATP6VOE1  
NRPE/SNRPF/SNRPC/GEMIN7/SRSF12/PRPF3/PRPF6/SNRPG/PRPF31/PRPF19/SART1/SART3/TGS1  
5/SLC1A4/SLC43A2/SLC7A8/SLC3A2/SLC7A10/SLC36A1/SLC38A5  
00A/STXBP2/LYN/FGFR/IL4R/VAMP8/C12orf4/STXBP1/ADORA2B/IL13RA2/CD84  
D2L1/SPDL1/DYNLT1/GPSM2/ACTL8/NDE1/NSFL1C/DCTN1  
/PSPH/HSF1/MSN/CAD/NASP/GBA/CALR/CBL/BAD/THBS1/CSNK2B  
FR1/DBF4/CDK2/RAC1/DBF4B/DNA2/GLI1/STOML2/DHX9/FAF1/EREG/ATAD5/UCN/E2F7/KCTD13/  
D2L1/SPDL1/DYNLT1/GPSM2/MAP4/LLGL1/ACTL8/NDE1/NSFL1C/DCTN1/HTT/ACTR1A/LLGL2  
/CHEK1/MAPK3/RPS6KA4/CDK2/AKAP8L/IL1B/CDK5  
/PHPT1/BAIAP2L1/DAPK3/ARHGDIB/HCLS1/CDK5/CDC42/GMFG/ARHGDIA/SEMA3E/ABL1  
GAP1

/PRKCD/SYK/F2RL1/CLEC7A/MAPT/CD177/GNAI3  
/CENPE/SMC4/CENPK/RNF4/CENPN  
TAT5A  
1/CCT8/GNL3/WRAP53  
3AR1/C5AR1/CMKLR1/CCL3/CXCL17/AKIRIN1/THBS1  
/TNFSF13B/TNFAIP3/ADAM17  
4/CCT7/TCP1/CCT8/WRAP53  
/RTKN  
1/CCT8/WRAP53

TYRO3/SRC/ITGA3/DAB2/CCNE1/DEPDC1B/BAMBI/DKK1/FOLR1/GPC4/GPC3/TAX1BP3/PLCB1/BIC  
/AURKB/UBE2S/CDK1/BUB1B/DAB2/PBK/TRIB3/CCNF/AURKA/SQSTM1/DTL/UHRF1/UBXN11/MAD2L  
EM2/KCTD17/UBD/AURKB/UBE2S/ANXA2/CTSC/CDK1/BUB1B/ATP13A2/DAB2/PBK/TRIB3/MAGEC2/  
AUR/RAC2/ATP13A2/SQSTM1/YWHAZ/HK2/VAT1/PIF1/FUNDC2/MX2/MPV17/MTFP1/TOMM40/TYMP/  
/ARPC1B/PFN2/STMN1/SH3BP1/ECT2/TGFB1/RHOV/COR01A/FLNA/COTL1/PRKCD/NCK2/BAIAP2L2  
RC/ITGA3/CSF1/ARL2/TGFB1/LGALS1/RIPK2/ADA/HAVCR2/COR01A/STX3/FLNA/CD44/ITGB2/IR  
K1/MAPK12/SRC/MAPK13/LIF/TTK/TGFB1/AURKA/DKK1/RIPK2/CD44/PKN1/PRKCD/NCK2/SYK/ST  
O3/SRC/S100A14/ITGAM/RIPK2/HAVCR2/BIRC3/ITGB2/IRAK1/PRKCD/RELB/HRAS/SYK/HCK/S10  
SF1/TYROBP/TGFB1/RIPK2/ADA/C1QC/CD74/FANCD2/SLAMF8/NME1/SYK/IL18/NME2/HMGB3/TNF  
/RIPK2/ADA/CD74/BATF/RELB/FANCD2/SYK/IL18/FZD7/TNFRSF18/JAK3/CD86/VAV1/SEMA4A/T  
RHGEF2/PLEK/TRIM54/ASPH/TWF2/MID1IP1/DNAJC6/KIF18A/CFL1/CARMIL1/EIF5A2/NCKAP5L/  
ROBP/TGFB1/RIPK2/ADA/CD74/SYK/IL18/PRMT1/HMGB2/CD86/TNFSF9/IL34/HIF1A/ATP6AP1/S  
MB9/PSMD14/PTK7/RUVBL1/PSMD2/EDA/CSNK1E/FAM53B/PSMB2/PSME3/PLEKHA4/DAPK3/CSNK1D  
FB1/FOLR1/VASP/FZD6/SCRIB/IFT57/CFL1/HNF1B/MTHFD1L/PTK7/STIL/HIF1A/FZD1/ST14/ED  
OBO1/SYK/S100A8/ASPH/CASP4/IFT57/HSF1/CARD9/TRAF2/BAX/BEX3/PERP/HIP1R/BID/BCAP3  
LF1/CDC25B/SRC/TIMP1/LHFPL2/LIF/TTK/AURKA/ADA/CDC25C/PTAFR/PLCB1/CDC25A/ASPM/ZP  
P131/KIF11/NUP62/CHEK1/SAC3D1/CHMP4B/BRSK1/STIL/CHD3/NPM1/CHMP4C/BRCA1/XRCC2/SG  
O1A/NCK2/BAIAP2L2/VASP/CDC42EP1/HCK/MAPRE1/CARMIL1/CCL26/ARPC4/PAK1/BAIAP2L1/FC  
YK/S100A8/CASP4/IFT57/HSF1/CARD9/TRAF2/BAX/BEX3/HIP1R/BID/BCAP31/PRR7/BBC3/PMAI  
P131/KIF11/NUP62/CHEK1/SAC3D1/CHMP4B/BRSK1/STIL/CHD3/NPM1/CHMP4C/BRCA1/XRCC2/SG  
RAK1/RELB/SYK/HMGB2/PRKDC/NFKB2/ISG15/SIRPA/IRF1/IRF3/STAT1/NPLOC4/POLR3K/POLR2  
S3/TGFB1/ITGAM/STX3/SQSTM1/YWHAZ/ITGB2/KCNJ11/PRNP/HRAS/EZR/RHOG/ANXA13/MTCL1/P  
RAK1/RELB/SYK/HMGB2/PRKDC/NFKB2/ISG15/SIRPA/IRF1/IRF3/STAT1/NPLOC4/POLR3K/POLR2  
3/ADA/CDKN2A/CD74/PKN1/SLC7A11/JAK3/CCL5/BAX/MIF/HIF1A/SLC39A10/IRF3/PRELI1/PD  
5F6/BMF/NOL3/HIP1R/BID/DYNLT1/UQC3/HSPA4/YWHAH/BBC3/PMAIP1/ZNF205/GSK3A/YWHAQ/  
VASP/FZD6/SCRIB/IFT57/MTHFD1L/PTK7/STIL/FZD1/ST14/DVL3/FZD2/TULP3/DEAF1/TGFB2/D  
2/TGFB1/GSTP1/CD74/CDK4/BAX/SIRT6/MIF/CD300A/PRKDC/FTH1/NUPR1  
54/MAPRE1/MID1IP1/MAP2/MAP1S/PAK1/TUBB4A/RANGRF/CAMSAP2/FKBP4/RAC1/STMN3/INPP5J  
/TPPP3/FBXO5/TUBB4A/RANGRF/CSNK1D/CAMSAP2/FKBP4/RAC1/INPP5J/TUBG2/RPS3/ZNF207/N  
BGN/RNF113A/KRT10/THBS1  
IRT6/MAPK3/DKC1/ACD/CCT2/CCT4/PNKP/CCT7/TCP1/PML/CCT8/GNL3/NBN/ERCC1/HNRNPA1/MA  
8/CKLF/CCL5/MIF/MAPK3/C3AR1/CCL2/NUP85/C5AR1/CMKLR1/CCL3/EMILIN1/CXCL17/AKIRIN1  
A/PRELI1/BID/BBC3/PMAIP1/PSMD10/GPX1/ARRB2/DNM1L/PDCD5/MFF/BAD/BCL2L1  
1/CDC25A/ASPM/PPP2R1A/FBXO5/CALR/MSX1/WNT4/LFNG/RAD1  
2/TYMP/PUDP/CAD/AMD1/GMPS/IMPDH2/PRTFDC1/NME6/APRT/NME7/GUK1/NME3/DCK/TRMT12/NM  
PD2/NCAPH/NCAPG2/SMC4/AKAP8L/NCAPH2/BANF1/CHMP1A  
RCA1/CBX3/EHMT2/RBBP4/CBX5/PCGF2/RBBP7/E2F6/RNF2/PPP2R5B/UXT/TFDP1/DAB2IP  
PSF4/TNIP1/BAD/CASP8/BCL2L1/ATG7/SERPINB9/CCL8/PABPN1/VAPA/KPNA4/CD4  
1/CXCL9/EHD2/IL4R  
/PRKCD/ACP5/SYK/F2RL1/AATF/CLEC7A/MAPT/CD177/GNAI3  
L13/KIF14/ITGB1BP1/CDH17/PIEZO1  
4/CCT7/TCP1/RUVBL2/CCT8/WRAP53/PIH1D1  
R2/GRB2/DNAJB6  
HP2/CCT7/TCP1/RUVBL2/CCT8/WRAP53/NOP10/EXOSC10  
HP2/CCT7/TCP1/RUVBL2/CCT8/WRAP53/NOP10/EXOSC10  
HP2/CCT7/TCP1/RUVBL2/CCT8/WRAP53/NOP10/EXOSC10  
HP2/CCT7/TCP1/RUVBL2/CCT8/WRAP53/NOP10/EXOSC10  
P1/NDE1/NSFL1C  
A/LBP

1/CCT8/WRAP53  
1/CCT8/WRAP53  
1/CCT8/WRAP53

A2/PCSK1N/GAPDH/IGF2BP2/GSTP1/TYMS/KRT17/EIF4EBP1/PTAFR/HSPB1/NCK2/SLC7A11/IGF2  
BE2S/CDCA3/TSP0/TRIM47/TRIB3/MAGEC2/CCNF/TRAIP/FANCI/RIPK2/DTL/UHRF1/BIRC3/BLMH  
/AURKB/UBE2S/CDK1/BUB1B/DAB2/PBK/TRIB3/CCNF/AURKA/SQSTM1/DTL/UHRF1/UBXN11/MAD2L  
17/UBD/AURKB/UBE2S/CTSC/CDK1/BUB1B/DAB2/PBK/TRIB3/CCNF/AURKA/CTSV/SCPEP1/SQSTM1  
TYRO3/SRC/ITGA3/DAB2/CCNE1/DEPDC1B/BAMBI/DKK1/FOLR1/GPC4/GPC3/TAX1BP3/PLCB1/BIC  
/IMPDH1/TREM2/ENO2/PFKP/ST6GALNAC4/BACE2/RENB/RRM2/TKT/TK1/ENO1/CHST11/ITM2C/V  
D/S100A4/SOX9/EPO/IKBKE/DUSP9/CDK1/ICAM1/LGALS9/SRC/PTP4A3/RAC2/LIF/CSF1/AKR1B1  
12/CHST11/ITM2C/VEGFB/SULF1/GAL3ST1/VCAN/B3GAT3/GAL3ST4/PLCB1/GPC1/NUDT14/TUSC3  
G1/DNM1/SERPINE2/SQSTM1/YWHAZ/ANO9/FCH01/DMKN/PRKCD/REEP4/BAIAP2L2/ABCD1/ASAP1/  
CDK1/ICAM1/LGALS9/TYRO3/LGALS1/CD74/ITGAV/NUP62/NECTIN1/RAN/TFRC/APOBEC3C/TRIM6  
/CD3D/MMP14/TGFB1/CMTM7/SPI1/LGALS1/RIPK2/ADA/CLCF1/CD74/BATF/RELB/FANCD2/SLAMF  
/MDK/MMP12/IKBKE/CTSC/FCER1G/TYRO3/SRC/MAPK13/S100A14/ITGAM/RIPK2/HAVCR2/OSMR/B  
/CEP131/TUBG1/CCDC28B/WDR34/MAPRE1/TUBB/ASAP1/DCDC2/IFT57/TUBB4B/KIF3C/ABCC4/RA  
TYRO3/ATP13A2/CSF1/TYROBP/ITGAM/PPT1/GPNMB/DKK1/GAPDH/CORO1A/CLCF1/ITGB2/C1QA/S  
/ARPC1B/PFN2/STMN1/SH3BP1/ATP1A1/DSG2/ECT2/TGFB1/RHOV/CORO1A/FLNA/COTL1/PRKCD/N  
/CEP131/TUBG1/CCDC28B/WDR34/MAPRE1/TUBB/ASAP1/DCDC2/IFT57/TUBB4B/KIF3C/ABCC4/RA

F1/SOX9/CDK1/TSP0/ETV5/NDRG1/MMP14/LIF/SERPINE2/CSF1/TGFB1/HDAC11/GSTP1/CLCF1/P

SF21/COL1A1/ICAM1/POSTN/TRAIP/GSTP1/TNFRSF12A/BIRC3/KCNJ11/ARHGEF2/SYK/TMSB4X/C  
2/LGALS1/RIPK2/GSTP1/SQSTM1/FLNA/BIRC3/IRAK1/ZDHHC13/CD74/HSPB1/RELB/NUP62/CARD  
3/TYROBP/ITGAM/PPT1/GAPDH/CORO1A/CLCF1/PRNP/HRAS/FOXQ1/UNC5B/GRN/DDIT3/HMOX1/BA  
8/CXCL5/ICAM1/SRC/TSP0/TGFB1/RIPK2/HAVCR2/GSTP1/IRAK1/PTAFR/ADAM9/HCK/IL18/CDK4  
TP1/CD44/CD74/ARHGEF2/BCL2A1/HSPB1/ITGAV/MAPK8IP2/MUC1/UNC5B/CDKN2D/ZNF385A/CRE

YWHAZ/ROBO1/VCAN/NCK2/IGLL5/CCT5/BSG/CCT3/CXCR4/COLEC12/MFGE8/NDN/MSN/ZP3/JMJD6  
D74/APOBEC3C/TRIM6/CHMP4B/TRIM28/CCL5/TRIM11/SLPI/ISG15/CHMP4C/PPIH/TRIM59/PABP  
IN28B/CSTF2/SNRPA/DKC1/UPF3B/ZC3H3/PABPC1/POLR3K/RNPS1/ERI3/NELFE/FBL/NCBP2/USB  
ANCD2/SYK/IL18/TNFRSF18/JAK3/CD86/TNFSF9/CD2/SASH3/SOCS1/IRF1/CTLA4/CD83/PRELID  
K2/BAX/SLC35F6/BMF/NOL3/LMNA/GGCT/PRELID1/PIM2/HIP1R/AIFM2/BID/YWHAH/BBC3/PMAIP  
F1R/CFL1/CHMP4B/CCL5/TRIM11/CHMP4C/POLR2G/SMARCA4/PPIH/PABPC1/LEF1/NELFE/POLR2H  
/HCK/CSF1R/EZR/TRPM2/PLEK2/MICALL2/DTNBP1/PHPT1/PTK7/PAK1/CAPN10/BAIAP2L1/SHC1/  
EP1/TWF2/PLEK2/RHOQ/FSCN1/WASF2/F2RL1/ARPC2/DYNLL1/RAC1/MIEN1/PFN1/CROCC/RALA/C  
VASP/FZD6/SCRIB/IFT57/MTHFD1L/PTK7/STIL/FZD1/ST14/DVL3/FZD2/TULP3/DEAF1/TGFB2/D  
RIPK2/HAVCR2/GSTP1/CD74/SYK/IL18/S100A8/CSF1R/HMOX1/MIF/HIF1A/SIRPA/F2RL1/IL1B/  
2/TGFB1/GSTP1/CD74/CDK4/BAX/SIRT6/MIF/CD300A/PRKDC/FTH1/NUPR1/WNT7B/B4GALT7/PDG  
/ADAM9/SYK/MUC1/COL16A1/PLAU/CCL5/ITGA5/SERPINE1/CD3E/ITGB5/FERMT1/NCKAP1L/CXCL  
A8/CCT2/UNC45A/HSPH1/FKBP4/CHORDC1/DNAJB2/ERO1A/DFFA/HSPE1/PDCD5/SGTB/DNAJC7/PT

A/RANGRF/CAMSAP2/FKBP4/RAC1/INPP5J/RPS3/CLIP3/DRG1/MAPT/ABL1/TBCD/STMN2/DCTN1/E  
LGALT1/SERPINH1/COL3A1/COMP/PLOD1/COL5A1/FMOD/PLOD2/PLOD3/COL5A2/LOXL2/TGFB2/LO  
P1/KIF18A/NCKAP5L/MAP1S/CAMSAP2/STMN3/KIF2A/KATNB1/CKAP2/CKAP5/STMN2/CCSAP/MAP1  
PPAN/RPLP0/RPL38/RPL23A/TRAFF7/RPL5/RPF2/RPL6/MRPL11/DHX30/RPL24/RPL11/RPL10/MRP  
MS/PCNA/E2F4/FBX05  
SASH3/CD83/LEF1  
NSMCE2/DDX11/SFPQ/ANAPC11/RAD21/HNRNPU/RAD18/BECN1/ANAPC5/ANAPC4  
2/PTGS1/IL1B/TBXAS1/HPGDS/PTGES3  
P3H3/PLOD2/PLOD3/JMJD4/EGLN2/P3H2/P4HB/OGFOD1/VPS33B/HIF1AN/CRTAP  
2/PTGS1/IL1B/TBXAS1/HPGDS/PTGES3

IVD/GCDH/ACADM/ACADL

4  
7A5

1

1IP

/APOC3  
GXT  
/APOC3

4A11/CYP2C8/CYP2C9  
1/CCT8/GNL3/WRAP53  
/AURKB/UBE2S/CDK1/BUB1B/DAB2/PBK/TRIB3/CCNF/AURKA/SQSTM1/DTL/UHRF1/UBXN11/MAD2L  
PAEP/GTSF1/AFP/RGS2/MDK/TOP2A/TRIP13/E2F1/SOX9/ASF1B/CDK1/CABYR/FOXJ1/TYR03/CDC  
1B3/PAEP/GTSF1/AFP/RGS2/MDK/TOP2A/TRIP13/E2F1/SOX9/ASF1B/LGALS9/CABYR/FOXJ1/TYR  
1B3/PAEP/GTSF1/AFP/RGS2/MDK/TOP2A/TRIP13/E2F1/SOX9/ASF1B/LGALS9/CABYR/FOXJ1/TYR  
NCS1/RAC2/ATP13A2/DAB2/ECT2/TGFB1/ITGAM/FLNA/ITGB2/CEP131/CPLX2/PRKCD/B3GAT3/PR

FB1/IQGAP3/DKK1/RIPK2/GSTP1/GDF15/IRAK1/S1PR2/CD74/PKN1/DUSP5/PRKCD/ROBO1/ADORA

MBI/DKK1/FOLR1/GPC3/BICC1/WNK2/FZD6/ASPM/TLE3/FZD7/CTNND2/PSMB9/DDIT3/PSMD14/PT  
1/CCT8

1/CCT8

12/POSTN/LGALS9/SRC/PTP4A3/RAC2/ATP13A2/ECT2/TGFB1/ITGAM/AACS/GAPDH/RIPK2/HAVCR  
13A2/CSF1/TYROBP/ITGAM/PPT1/GPNMB/DKK1/CORO1A/CLCF1/ITGB2/C1QA/SLC7A11/ADORA1/P  
MBI/DKK1/FOLR1/GPC3/BICC1/WNK2/FZD6/ASPM/TLE3/FZD7/CTNND2/PSMB9/DDIT3/PSMD14/PT

LS1/RIPK2/GSTP1/SQSTM1/FLNA/BIRC3/IRAK1/ZDHHC13/CD74/HSPB1/NUP62/CARD9/TRAF2/RB  
/SEMA6A/CSF1/TGFB1/ARHGAP4/AURKA/TNFRSF12A/PLXNA3/DDR1/TWF2/TRPV2/HNF1B/AREG/TR  
ITGAM/PPT1/CORO1A/CLCF1/PRNP/HRAS/FOXQ1/UNC5B/GRN/DDIT3/HMOX1/BAX/DNAJC5/CASP2/  
ALS9/TIMP1/ITGA3/ACSL4/LIF/SERPINE2/AKR1B1/DSG2/FBLN1/TGFB1/STC2/CTSV/HAVCR2/PT  
GALS9/TYRO3/SRC/TGFB1/LGALS1/GAPDH/TYMS/CD74/ITGAV/NECTIN1/ALYREF/SCRIB/TFRC/CH  
C1/CORO1A/FLNA/NCK2/BAIAP2L2/VASP/PLEK/CDC42EP1/COLGALT1/HCK/MAPRE1/CFL1/S100A1  
TRIB3/MAGEC2/FANCI/RIPK2/BIRC3/MAD2L1/FKBP1A/MAD2L2/UBE2I/ISG15/BRCA1/COPS9/RPS  
AC2/RCC2/AGRN/PRKCD/HRAS/CDC42EP1/TWF2/DCDC2/TRPM2/RHOG/PLEK2/RHOQ/FSCN1/WASF2/  
S3/PLAUR/TRIB3/TGFB1/BAMBI/RIPK2/NME1/MAPRE1/LARP6/RAN/HSF1/S100A10/TRAF2/HMGB2  
P1/MX2/YKT6/RAB34/CXCR4/ANKRD27/STX1A/STX6/RAB7B/STX10/PPIA/RABIF/RAB20/CHMP3/F  
/HMGB2/JAK3/HMOX1/BAX/PRDX1/FLVCR1/HIF1A/JMJD6/ISG15/STAT1/AMPD3/NCAPG2/NCKAP1L  
PO/TYROBP/GPNMB/CYBB/RIPK2/HAVCR2/GSTP1/PTAFR/ARHGEF2/HSPB1/ACP5/SYK/HSF1/CARD9  
CLGN/NCK2/CREB3L1/HSF1/DDIT3/BAX/HSPA6/CREB3/HSPA8/LMNA/DDX11/HYOU1/ARFGAP1/EXT  
ORD/UGT2B15

DH1A/ADH1C/ADH1B/ADH4

/GLYAT

1/AASS/PIPOX

/ALDH7A1/SHMT1/ACADL/DMGDH/BHMT

A5/APOC3

SLC25A47

ORD/UGT2B15

3

0A1/APOA5/APOC3

2C9/CYP3A4

7A5

/TAT

LDH1L1/ADHFE1

C/APOA2/LCAT/APOA1/APOC3

/MCEE/ACADS/PHYH/ALDH5A1/PCK2/PCK1

E1/P3H4/RAD51/AURKA/RAD54L/FANCD2/C11orf80/EME1/PSMC3IP/ESPL1/MND1/NDC1/FBXO5/P  
2/MUC1/CHST4/B4GALT5/GALNT10/B3GNT5/GALNT18/B3GNT7/PLOD3/ST3GAL4/MUC3A/POMT2/MU  
1A/TFF2/ROBO1/STK39/CCL5/SLC12A2/CXCR4/CCL26/GPR35/HIF1A/CCL13/ZC3H12A/CCL2/CXC  
1A/TFF2/ROBO1/STK39/CCL5/SLC12A2/CXCR4/CCL26/GPR35/HIF1A/CCL13/ZC3H12A/CCL2/CXC  
MT1M/MT1G/MT1E/MT1X

MF8/NBL1/PLCB1/CCL5/CCL26/CREB3/MAPK3/SERPINE1/JAML/SIRPA/C3AR1/CCL13/TNFRSF11A  
D74/SLC7A11/JAK3/CCL5/BAX/MIF/HIF1A/SLC39A10/PRELI1/PDCD1/IRF7/NOC2L/ADAM8/PIK  
YBB/RIPK2/HAVCR2/PTAFR/ARHGEF2/HSPB1/SYK/CARD9/CD86/MAPKAPK2/MIF/CD2/SASH3/SPON

P1/MASP2  
ARG1/NAGS/OTC/CPS1  
1/AASS/PIPOX  
AGXT  
1/ACADL  
/MT1X

P1A1/CYP2A7/CYP1A2/CYP4F2/CYP2B6/CYP4A11/CYP2E1/CYP2C8/CYP2C9/CYP2A6  
PS1/CYP2C9  
CR/SCP2/ACOX2/EHHADH  
APOA2/LCAT/APOA1/APOA5/APOC3

D1/APOA1/APOC3

/HRG  
OTC/CPS1/CYP2C9  
/MT1X  
AD2L2/IL27RA/BCL3/CDH17/MSH2/SWAP70/GPR183/EXOSC3/MFNG/HSPD1/LFNG/ABL1/FCGR2B/N  
D/RAB34/HMOX1/CD300A/STXBP2/PLEKHM2/PIK3CD/LYN/LAMTOR1/S100A13/FGR/KXD1/IL4R/BT  
GLL5/RAB31/MFGE8/CD300A/GULP1/HGS/F2RL1/NCKAP1L/MSR1/ITGA2/CDC42/FCGR2B/BIN2/SP  
A-DPA1/ZP3/HLA-DPB1/CD2/EBI3/CD276/IL27RA/CD3E/SASH3/BCL3/SLC11A1/IL1B/IL12RB1/

9/KNG1/SERPINC1  
OC1/APOA2/LCAT/ALB/APOA1/APOC3  
C6A1  
/LMNA/GGCT/PRELID1/BID/BBC3/PMAIP1/PSMD10/GPX1/ARRB2/DNM1L/PDCD5/TIMM50/MFF/BAD  
4/TRAF2/RBCK1/SHARPIN/NOL3/F2RL1/CPNE1/CASP1/CARD16/IKBKG/RACK1/ZNF675/CLIP3/PE  
ESPL1/NAA10/SGO2/PPP2R1A/NSMCE2/SGO1/DDX11/SFPQ/RAD21/ESCO2/RAD51C/BOD1  
1/CARD9/VSIG4/TRAF2/CD86/CD3E/SASH3/CD83/LAG3/CARD11/IL1B/RPS3/PRKD2/CLEC7A/ABL  
H/FKBP11/FKBP9/PIIA/FKBP4/PPIL1/PTPA/CWC27/NTMT1/FKBP8/EGLN2/AIP/PIIE/PIIB/FKBP  
1A1/SULT1E1/SULT1B1/ALDH2/ADH6/SULT2A1/ADH1A/ADH1C/ADH1B/ADH4  
BX1/PABPC1/SLC11A1/HNRNPU/DHX9/RBM10/RBM24/LARP1/HNRNPA0/HNRNPD/HNRNPC/SYNCRIP/  
2/TYMP/PUDP/CAD/AMD1/GMPS/IMPDH2/PRTFDC1/NME6/APRT/NME7/GUK1/NME3/DCK  
BBP8/BRCA1/CBX3/EHMT2/RBBP4/CBX5/PCGF2/RBBP7/E2F6/RNF2/PPP2R5B/UXT/TFDP1/DAB2IP  
P/CDK5/AP2M1/AP2S1/MVB12A/PTPN1/SH3GLB1/AP2A2/CLTC/AP2B1/LGMN/BECN1/AP2A1  
BBP8/BRCA1/CBX3/EHMT2/RBBP4/CBX5/PCGF2/RBBP7/E2F6/RNF2/PPP2R5B/UXT/TFDP1/DAB2IP  
MIF/MAPK3/C3AR1/C5AR1/CMKLR1/CCL3/EMILIN1/CXCL17/AKIRIN1/CYP19A1/THBS1  
SRC/LIF/TTK/TGFB1/RIPK2/UNC119/CLCF1/CD44/ITGB2/CD74/ARHGEF2/PRKCD/NCK2/ADORA1/  
SRC/LIF/TTK/TGFB1/RIPK2/UNC119/CLCF1/CD44/ITGB2/CD74/ARHGEF2/PRKCD/NCK2/ADORA1/  
TNFRSF21/COL1A1/ICAM1/POSTN/TRAIP/GSTP1/TNFRSF12A/BIRC3/KCNJ11/ARHGEF2/ADAM9/SY  
8/CXCL5/ICAM1/SRC/TSPO/TGFB1/RIPK2/HAVCR2/GSTP1/IRAK1/PTAFR/ADAM9/SYK/HCK/IL18/  
5/ICAM1/SRC/TSPO/TGFB1/RIPK2/HAVCR2/GSTP1/IRAK1/PTAFR/ADAM9/HCK/IL18/CDK4/ANKRD  
WDR4/SLFN13/CSTF2/TRMU/FTSJ1/METTL1/POLR3K/PUS1/POP7/URM1/DTD1/TRMT1/SSB/TRMT61  
YBX3/EIF5A2/CCL5/MAPK3/SMPD2/NPM1/UPF3B/POLR2G/NSMAF/RBM3/PABPC1/BCL3/EIF3D/ITG  
PO/TYROBP/GPNMB/CYBB/RIPK2/HAVCR2/GSTP1/PTAFR/ARHGEF2/HSPB1/ACP5/SYK/HSF1/CARD9  
HP2/CCT7/TCP1/RUVBL2/CCT8/NOP10/EXOSC10

CK2/ADORA1/SHKBP1/NUP62/NCF1/AREG/DOK1/IQGAP1/RHBDF1/HGS/TGFA/HIP1R/SH3KBP1/CNO

RT6/NUP210/NAA40/MAP2K2/POLR2G/NUP93/NUP205/NUP37/NDC1/POLR2H/NUP188/ZC3H12A/CD  
1/CCT8/WRAP53  
/BCKDHB/IVD/ACAT1/ACADSB/ALDH6A1  
/BCKDHB/IVD/ACAT1/ACADSB/ALDH6A1  
F3B/ZC3H3/PABPC1/RNPS1/NELFE/NCBP2/U2AF2/SRSF9/CPSF1/THOC5/THOC6/CPSF6/EIF4A3/B  
DH5A1/DMGDH/ABAT/BHMT  
1A2/CYP2B6/CYP2E1/CYP2C8/CYP2C9/CYP2A6/CYP3A4  
RIDA/SDS/AASS/MAT1A/PIPOX  
AT/ACMSD/TDO2/KMO/ALDH7A1/SARDH/HAAO/DMGDH/BHMT  
CTH/PON3/CYP1A2  
AO/ALDH8A1/PON3/GSTM1/CYP2E1  
E2J2/NPEPPS/YWHAH/BBC3/PMAIP1/UBE2L3/GSK3A/YWHAQ/YWHAB/BAG3/GZMB/PDCD5/MAPT/BAD  
A/GAPDH/RNASE6/CCL13/CXCL9/CXCL3/CXCL13/DEFB1/RPL39/PF4V1/REG1B/CXCL11/RPS19/RO  
RPS5/RPS21/BYSL/RRP36/RPS19/RRP7BP/TSR3/UTP4/RPL38/MRPS7/NAT10/UTP6/HEATR1/KRI1  
RFGAP1/EXTL3/SHC1/WFS1/GSK3A/ZBTB17/DNAJB11/PDIA6/CXXC1/ATP6VOD1/SRPRB/WIP11/TA  
CL26/MSN/IL27RA/ADAM8/MY01G/CCL2/PIK3CD/CXCL13/CXCR3/CXCL16/CXCL11/XCL2/APP/FAD  
/AKR1C4/SLC02B1/ABCB11/SLC51A/SLC01B3/SLC01B1/SLC27A5/AQP9/SLC10A1  
RG  
CYP4F2/APOC3  
ARDH/ACADL/ALDH1L1/DMGDH/BHMT  
MO/HAAO  
8A1/CYP3A5/ADH6/ADH1A/ADH1C/CYP2C8/ADH1B/CYP3A4  
/PLIN5/ACADL/APOC1/INSIG1/CYP7A1/APOC3  
CPS1/GCGR/PCK1  
RG  
1/DOK1/TGFA/HIP1R/CNOT9/ADRA2A/CBL/ARAP1/ADAM17  
1/DOK1/TGFA/HIP1R/CNOT9/ADRA2A/CBL/ARAP1/ADAM17/RBPJ/EREG/EGF/NEURL1/PDE6G  
CD2/BATF2/LTBR/BATF3  
GAL/HPSE/OVOL2/KDF1/TRADD/KRT10/NOTCH1/SFRP4/ALOX15B/CYP27B1  
RD27/SNF8/CHMP3/PTPN23/SNX12/WDR91/HOOK2/LMTK2/VPS11/BECN1/SNX3/SNX16  
PK3/C3AR1/CCL2/NUP85/C5AR1/CMKLR1/CCL3/CXCL17/AKIRIN1/CYP19A1/THBS1  
/BBC3/PMAIP1/ZNF205/GSK3A/YWHAQ/YWHAB/GZMB/BAD/CASP8  
PYCARD/TPX2/SOX9/CDC6/EPO/ANXA2/DUSP9/CDK1/ICAM1/LGALS9/PFN2/VEGFB/CDC25B/SRC/M  
XJ1/RGS10/ARHGEF16/DEPDC1B/ECT2/RCC2/ARHGAP4/AGRN/RACGAP1/TAX1BP3/CHML/HRAS/ADA  
/DNMT1/CHEK1/RAN/SMARCD1/TRIM28/SIRT6/LIN28B/NUP210/NAA40/MAP2K2/BRCA1/POLR2G/C  
3ST1/B3GAT3/NUDT14/TUSC3/DPM2/MUC1/CHST4/ALG3/MGAT5/DDOST/B4GALT5/TMEM165/GALNT  
3ST1/B3GAT3/NUDT14/TUSC3/DPM2/MUC1/CHST4/ALG3/MGAT5/DDOST/B4GALT5/TMEM165/GALNT  
TRIB3/MAGEC2/FANCI/RIPK2/BIRC3/MAD2L1/FKBP1A/MAD2L2/ISG15/BRCA1/RPS2/HSP90AB1/S  
ALS9/TIMP1/ITGA3/ACSL4/LIF/AKR1B1/DSG2/FBLN1/TGFB1/STC2/CTSV/HAVCR2/PGF/DDR1/PT  
/RUVBL2/PTPRF  
ALS1/RIPK2/ADA/EXO1/HAVCR2/CORO1A/CLCF1/BATF/RELB/UNC13D/IL18/TFRC/HLA-DMB/JAK3  
PO/TYROBP/GPNMB/CYBB/RIPK2/HAVCR2/GSTP1/PTAFR/ARHGEF2/HSPB1/ACP5/SYK/HSF1/CARD9  
PO/TYROBP/GPNMB/CYBB/RIPK2/HAVCR2/GSTP1/PTAFR/ARHGEF2/HSPB1/ACP5/SYK/HSF1/CARD9  
TYROBP/TGFB1/GPNMB/HAVCR2/CD74/PKN1/PRNP/PAG1/HMGB3/TNFAIP8L2/VTCN1/VSIG4/JAK3/  
17B8/ESR1/AKR1C4/PPARGC1A/UGT2B7/SRD5A2/AKR1D1/HSD17B6/CYP3A4  
POA2/LCAT/APOA1/APOA5/APOC3  
S6/SERPINF2/APOH/CPB2/KLKB1/F12/PLG/HRG  
YP1A2/CYP2E1/CYP2C8/CYP2C9/CYP3A4  
RG  
MT1G/MT1E/CYP1A1/MT1X/CYP1A2  
F7/APOH/KLKB1/F12/F9/KNG1/SERPINC1



SF1/TRIM28/SIRT6/PRKDC/MAD2L2/BRCA1/PCNA/PARPBP/DDX11/OTUB1/AUNIP/KDM1A/WAS/PML  
/CYP39A1/ABCB11/ACOX2/BAAT/SLC27A2/AKR1D1/CYP7A1/SLC27A5/CYP8B1  
/FABP1/APOB/GPLD1/AADAC/FABP4/APOA1/APOA5/APOC3/CPS1  
BAD/CASP8/LGMN  
B1BP1/TACSTD2  
AP4/PLXNA3/LINGO1/SEMA4A/MAP2/EFNA5/THY1/CORO1C/GDI1/MT3/YWHAH/ITGB1BP1/CDK5/TA  
1/GPC3/EFNA4/CD109/CSF1R/TFRC/TCIRG1/ATP6AP1/UBASH3B/TNFRSF11A/FSTL3/TFE3/SNX10  
PLIN5/AGMO/GPAM/ACSL1/ANG/PCK2/GPLD1/RGN/THRSP/MOGAT2/PCK1  
PLIN5/AGMO/GPAM/ACSL1/ANG/PCK2/GPLD1/RGN/THRSP/MOGAT2/PCK1  
1/C1S/CFI/C3/C4BPB/C7/MBL2/C8B/MASP2/C8A/C4BPA/C6  
FOXO1/IRS1/IRS2/GCK/DGAT2/PPARGC1A/GPLD1/RGN/IGF2  
38A3/ABAT/SLC6A1/CYP4F2/CYP4A11  
DH6/RDH16/CYP1A2/TTR/ADH1A/ADH1C/ADH1B/ADH4/CYP3A4

PLIN5/AGMO/GPAM/ACSL1/PCK2/GPLD1/RGN/THRSP/MOGAT2/PCK1  
CDO1/CPS1/GCGR/PCK1  
TP/HNF4A/APOE/RORA/APOC2/LIPG/GCKR/GPIHBP1/DGAT2/APOC4/ANGPTL4/LIPC/MLXIPL/PLA2  
TP/HNF4A/APOE/RORA/APOC2/LIPG/GCKR/GPIHBP1/DGAT2/APOC4/ANGPTL4/LIPC/MLXIPL/PLA2  
C3/PLIN5/GPLD1/AADAC/RGN/THRSP/APOA5/APOC3  
/IRF1/IRF3/STAT1/POLR3K/POLR2H/IRF7/FLOT1/PQBP1/IFI16/POLR2L/DDX41/POLR2K/XRCC6  
4/CYP3A7/HSD17B8/CYP1A1/CYP3A5/CYP1A2/CYP2C8/CYP2C9/CYP3A4  
/QDPR/ACMSD/GCDH/TDO2/KMO/HAAO/HGD/IYD/MTHFD1/AMDHD1/PAH/FTCD/UROC1/HPD/TAT  
1/APOM/LIPC/APOB/APOC1/LPA/APOA2/LCAT/ALB/APOA1/APOA5/APOC3

SLC39A10/THY1/LYN/CBFB/NFAM1/LCK/PTPN6/RPS3/PRKD2/LILRB4/BTN2A2/FCGR2B/KCNN4/BC  
/QDPR/ACMSD/TDO2/KMO/HAAO/HGD/AMDHD1/PAH/FTCD/UROC1/HPD/TAT  
1/APOM/LIPC/APOB/APOC1/LPA/APOA2/LCAT/ALB/APOA1/APOA5/APOC3  
1/APOM/LIPC/APOB/APOC1/LPA/APOA2/LCAT/ALB/APOA1/APOA5/APOC3

B/PPP2R1A/LMNA/NUP93/AKAP8L/BANF1/TMEM43/NUP155/CTDNEP1/DMPK/VRK1/ANKLE2/EMD/NS  
D/MTHFD1/MAT1A/CTH/CDO1/AGXT/CPS1/GNMT/BHMT  
7/GSTZ1/AADAT/ACAT1/TDO2/AASS/ACOT12/PIPOX/PDK4/HMGCS2  
GLUD1/AADAT/GOT2/NAGS/GLS2/PRODH2/ALDH5A1/ADHFE1/AMDHD1/FTCD/UROC1/TAT  
5/C6/HRG  
POC2/APOM/APOB/APOC1/ABCG8/ABCG5/APOA2/PON1/APOA1/APOA5/APOC3

POA2/LCAT/APOA1/APOA5/APOC3  
CAA1/HSD17B4/CYP4F12/SLC27A2/CYP4F2/SLC27A5  
1/UGP2/IRS1/IRS2/GCK/PPP1R3B/IGF2/GYS2  
7A1/TTPA/CYP1A1/CYP4F2/CYP3A4  
1/UGP2/IRS1/IRS2/GCK/PPP1R3B/IGF2/GYS2  
/ACACB/CPT1A/IRS1/IRS2/DGAT2/PLIN5/PPARGC1A/FABP1/ACADL/PDK4  
/PLIN5/LIPC/FABP1/APOB/APOA2/GPLD1/AADAC/FABP4/APOA1/APOA5/APOC3/CPS1  
/PLIN5/LIPC/FABP1/APOB/APOA2/GPLD1/AADAC/FABP4/APOA1/APOA5/APOC3/CPS1

VEGFB/STMN1/SULF1/TYRO3/SRC/SEMA6A/PTP4A3/PLAUR/DNM1/MPZL1/CSF1/TGFB1/CYBB/RHBD  
TSF1/AFP/RGS2/MDK/TOP2A/TRIP13/E2F1/SOX9/ASF1B/CABYR/FOXJ1/TYRO3/CDC25B/B4GALNT  
YCARD/PKIB/LIMK1/RGS2/FOXN1/SOX4/DUSP9/BAK1/MICAL1/TSP0/SEMA6A/LGALS3/LIF/PBK/T  
TGA3/DAB2/DEPDC1B/BAMBI/DKK1/FOLR1/GPC3/TAX1BP3/BICC1/WNK2/FZD6/ASPM/TLE3/DCDC2  
TM1/QSOX1/TOMM40/ATP6V0B/ATP6V0D2/CHMP4B/HMOX1/VPS37C/ATP6V1C1/RRAGD/FUNDC1/HIF

ABPC1/SLC11A1/HNRNPU/DHX9/RBM10/RBM24/LARP1/HNRNPA0/HNRNPD/HNRNPC/SYNCRIP/ELAVL  
CK/PTPN6/RPS3/PRKD2/LILRB4/BTN2A2/KCNN4/BCL10/PTPN2/RAB29/DUSP22/NECTIN2  
B1/RIPK2/UNC119/CLCF1/CD44/ITGB2/CD74/ARHGEF2/PRKCD/NCK2/ADORA1/PRNP/MVP/SYK/IL  
/CD3E/SASH3/CD83/LEF1  
N1/BAK1/SRC/LGALS3/DAB2/TRIB3/BAMBI/AURKA/DKK1/RIPK2/PRKCD/SMARCD3/MAPRE1/ADAM1  
7/NDC1/NUP188/NCBP2/XPOT/SSB/NUP85/NUP43/RAE1/NUP155/NUP107/SEC13/NOL6  
/AP5Z1/CHMP4B/SNX8/RAB6B/VPS37C/MICALL1/CHMP4C/ANKRD27/CORO1C/STX6/HGS/RAB7B/SO  
/PRKCD/HLA-DRB1/HLA-DQA1/HCK/ZYX/HLA-DRA/IFNGR2/HLA-DQB1/IFI30/SLC26A6/GBP5/HLA  
CLGN/HSPB1/NCK2/SERPINH1/CREB3L1/COMP/HSF1/DDIT3/BAX/HSPA6/CREB3/MANF/HSPA8/LMN  
CD74/FANCD2/SLAMF8/SYK/IL18/HMGB3/TNFRSF18/JAK3/CD86/TNFSF9/CD2/SASH3/SOCS1/IRF  
ROBP/TGFB1/RIPK2/ADA/CD74/SYK/IL18/CD86/TNFSF9/IL34/ATP6AP1/SASH3/SOCS1/CD83/LE

CK2/ADORA1/MVP/SHKBP1/NUP62/NCF1/AREG/DOK1/IQGAP1/RHBDF1/HGS/TGFA/HIP1R/SH3KBP1  
YP27A1/CYP39A1/ABCB11/ACOX2/BAAT/SLC27A2/AKR1D1/CYP7A1/SULT2A1/SLC27A5/CYP8B1  
IPG/SCP2/APOC1/ABCG8/ABCG5/APOA2/ABCB4/PON1/APOA1/APOA5/APOC3  
IPG/SCP2/APOC1/ABCG8/ABCG5/APOA2/ABCB4/PON1/APOA1/APOA5/APOC3  
/MLXIPL/ACADL/APOC1/INSIG1/RGN/PDK4/APOA5/CYP7A1/APOC3  
/HMGB2/CHMP4B/PYGO2/PES1/PPP2R1A/CHMP4C/BIN1/LMNA/NUP93/NUP205/NDC1/EMG1/AKAP8L  
KN1/PRKCD/STK39/CDC7/CHEK1/TRIM6/SPRED1/CAD/DYRK2/CSNK1E/MARK2/DDIT4/CSNK1D/AXI  
/KDF1/UGCG/SRF

1/SFPQ/RAD21

RTFDC1/NME6/APRT/NME7/GUK1/NME3/NME4

RTFDC1/NME6/APRT/NME7/GUK1/NME3/NME4

1/UGCG

AD/SHMT1/RIDA/SDS/BAAT/MTHFD1/AGXT2/CTH/DAO/CD01/AGXT/GLYAT

1/APOM/APOC4/LIPC/MTPP/APOB/APOC1/LPA/APOA2/LCAT/ALB/APOA1/APOA5/APOC3

SMD2/MAPK3/PSMB2/RPS6KA4/PSME3/TNIP2/PSMB4/IL1B/PSMB8/PSMB10/PSMA5/PSMD13/PSMC4  
1/C1S/CFI/C3/C4BPB/C7/MBL2/C8B/MASP2/C8A/C4BPA/HPX/C6

M1/IL6R/ASS1/ORM2/HAMP/SAA4/MBL2/F2/SERPINF2/TFR2/HP/AHSG

ACACB/APOE/POR/SC5D/TM7SF2/GPAM/APOB/SEC14L2/CYP7A1

ACACB/APOE/POR/SC5D/TM7SF2/GPAM/APOB/SEC14L2/CYP7A1

DAB2/MMP14/TGFB1/STX3/SQSTM1/KCNJ11/PRNP/EZR/RHOG/ANXA13/RHOQ/PKDCC/CNPY4/RANGL  
2/ROBO1/STK39/CCL5/CXCR4/CCL26/GPR35/HIF1A/CCL13/CCL2/CXCL9/CXCL3/CXCL13/CXCR3/  
B/LCP1

YBB/RIPK2/HAVCR2/PTAFR/ARHGEF2/HSPB1/SYK/CARD9/MAPKAPK2/MIF/CD2/SASH3/SPON2/HDA  
3/CBFB/PSMB4/PSMB8/PSMB10/PSMA5/PSMD13/PSMC4/PSMD10/PSMD11/PSMD1/PSMA7/PSMB3/PS

GUK1/NME3/NME4

/GTSE1/CCT5/RAN/GLIS2/CCT6A/CCT3/TRIM28/NUTF2/CARD10/DKC1/MCRS1/CCT2/ZC3H12A/CC  
B/HAVCR2/GSTP1/PKN1/PRNP/VTCN1/VSIG4/CD86/CD300A/MNDA/CTLA4/PLA2G2D/LYN/IL2RA/P  
SEMA4D

AB7B/MT3/CLN3/RAB20/GBA/LAMTOR1/CLN6/VPS18/NAGPA/TMEM199/HPS1/HOOK2/VPS35/HEXB/

AB7B/MT3/CLN3/RAB20/GBA/LAMTOR1/CLN6/VPS18/NAGPA/TMEM199/HPS1/HOOK2/VPS35/HEXB/

PYCARD/TPX2/SOX9/CDC6/EPO/ANXA2/DUSP9/CDK1/ICAM1/LGALS9/PFN2/VEGFB/CDC25B/SRC/M  
25B/SRC/MMD/CKS2/CSF1/ECT2/TGFB1/IQGAP3/STK26/DKK1/RIPK2/UNC119/PSRC1/GDF15/IRA

B9/TRAF2/PSMD14/FOXK1/RUVBL1/PSMD2/HIF1A/JOSD2/BRCA1/MCRS1/HGS/ACTL6A/FOXK2/PSM  
AUR/RAC2/ATP13A2/SQSTM1/YWHAZ/HK2/VAT1/MICALL2/SAE1/BAX/HIF1A/SLC35F6/BMF/NOL3/  
/ASAP1/EZR/DCDC2/FSCN1/CHMP4B/RABEP2/MSN/STIL/NUPR1/LCP1/NPM1/CHMP4C/BRCA1/DYNL  
SX1/WNT4/RAD1

1/CXCL9/EHD2/IL4R

2/PSMB2/PSME3/LBH/JAG1/CBFB/NELFB/PSMB4/PSMB8/PSMB10/PSMA5/TGFB2/PSMD13/PSMC4/P  
/SULT1A2/DDC/MAOA/GCH1/DRD1/MAOB/DBH/ABAT/PAH/DAO  
/SULT1A2/DDC/MAOA/GCH1/DRD1/MAOB/DBH/ABAT/PAH/DAO

X2/CYP1A1/CYP2A7/CYP1A2/CYP4F2/CYP2B6/CYP4A11/CYP2E1/CYP2C8/CYP2C9/CYP2A6

R2/GPD1/CRHBP/CPS1/PCK1/AQP9

R1A/KMO/SLC38A3/ABAT/ABCB4/SLC6A1/APOA1/CYP4F2/CYP4A11

G2/TGFB2/VDR/PAX8

S/CFI/CPN1/CFB/C3/CFH/VTN/CD5L/CFHR1/C4BPB/CFHR2/C7/C8B/F2/CPN2/CPB2/C8A/C4BPA/

/FA2H/MYADM/PACSLN2/DOCK2/CAV2/CAV1/PTPRC/ABCA7

1/APOM/APOC4/LIPC/MTTP/APOB/APOC1/LPA/APOA2/LCAT/ALB/APOA1/APOA5/APOC3

OT2/GCDH/BHMT2/ALDH7A1/ADI1/RIDA/SDS/AASS/MTHFD1/MAT1A/PIPOX/GNMT/BHMT

MT1G/MT1E/ALAD/ARG1/KHK/HAAO/MT1X/OTC/CPS1

S/CFI/CPN1/CFB/C3/CFH/VTN/CD5L/CFHR1/C4BPB/CFHR2/C7/C8B/F2/CPN2/CPB2/C8A/C4BPA/

AADAT/ACMSD/GCDH/TDO2/DBH/KMO/ALDH7A1/SULT1B1/SARDH/HAAO/DMGDH/BHMT

A/F2/F11/TMPRSS6/SERPINF2/APOH/CPB2/KLKB1/ABAT/F12/KNG1/PLG/HRG

POM/DGAT2/APOC4/LIPC/APOB/APOC1/APOA2/CES3/GPLD1/APOA1/APOC3

B1/CYP27A1/CYP39A1/ALDH2/SORD/AKR1D1/HA01/CYP7A1/SULT2A1/ADH4

/PLPP3/VTN/F2/F7/SERPINF2/APOH/CPB2/F12/PLG/HRG

A/F2/F11/TMPRSS6/SERPINF2/APOH/CPB2/KLKB1/ABAT/F12/KNG1/PLG/HRG

YN/BTK/BCL10

LIP3/TBCD/STMN2/EML2

4/CENPN

TAT5A

/IL2RB/GRB2

K1D

E2J2/NPEPPS/YWHAH/BBC3/PMAIP1/UBE2L3/GSK3A/YWHAQ/YWHAB/GZMB/PDCD5/BAD/CASP8/SH3

C3

7A5

A/F2/F11/TMPRSS6/SERPINF2/APOH/CPB2/KLKB1/ABAT/F12/KNG1/PLG/HRG

RA/ACACB/PDE3B/CPT1A/APOC2/IRS1/RARRES2/SORL1/IRS2/PLIN5/FABP1/APOC1/APOA2/GPLD

BG2

TAT5A

1/CCT8/WRAP53

/EPO/DBN1/REG1A/PLXNA1/ITGA3/TSP0/SEMA6A/MMD/ETV5/LIF/SERPINE2/CSF1/TYROBP/ECT2  
1/POSTN/REG1A/STMN1/PLXNA1/SRC/SEMA6A/RAC2/PDLIM7/ENAH/ARHGAP4/AURKA/STK26/EFNA  
PO/DBN1/REG1A/ITM2C/PLXNA1/ITGA3/SEMA6A/MMD/ETV5/NCS1/ECT2/ARHGAP4/LGALS1/DKK1/  
1/POSTN/REG1A/STMN1/PLXNA1/SRC/SEMA6A/RAC2/PDLIM7/ENAH/ARHGAP4/AURKA/STK26/EFNA  
/PGC/TNFRSF21/MMP12/IKBKE/FCER1G/ARPC1B/LGALS9/TYR03/SRC/CD3D/LGALS3/S100A14/TG  
EBP1/PTAFR/HSPB1/NCK2/IGF2BP1/LARP6/CDK4/TCOF1/IGF2BP3/ZNF385A/RPS6KA1/YBX3/EIF  
C5/PTTG1/PYCARD/RENBP/CRYAB/LGALS9/BAK1/MAPK12/MICAL1/SRC/TIMP1/PLAUR/SPINT2/AT  
6/LCN2/PGC/MMP12/FCER1G/S100A14/TGFB1/GAPDH/RIPK2/HAVCR2/FLNA/BIRC3/BATF/CCDC88  
GS2/CRYAB/ENO1/DBN1/REG1A/SEMA6A/MMP14/CLSTN1/SERPINE2/TGFB1/ARHGAP4/PPT1/PSRC1  
BAX/MIF/HIF1A/SLC39A10/PRELID1/PDCD1/NOC2L/ADAM8/LYN/BIRC7/CD27/FADD/BTK  
B9/TRAF2/PSMD14/FOXK1/RUVBL1/PSMD2/HIF1A/JOSD2/BRCA1/MCRS1/HGS/ACTL6A/FOXK2/PSM  
ALNT1/GAL3ST1/B3GAT3/NUDT14/TUSC3/DPM2/MUC1/CHST4/ALG3/MGAT5/DDOST/B4GALT5/TMEM  
/WDR77/FBX05/ARHGDIB/CALR/PRDX4/HPGDS/WNT4/RAD1  
URKA/GPNMB/STK26/IRAK1/MVP/SYK/STK39/HCK/DDR1/WNK2/NME2/CSF1R/TRIM28/MAPKAPK2/I  
6/LCN2/PGC/FCER1G/S100A14/RIPK2/HAVCR2/PRKCD/SLAMF8/IGLL5/ACP5/SYK/S100A8/LYZ/R  
S2/KMO/ARG1/SLC38A3/ABAT/SLC6A1/CYP4F2/CYP4A11  
TYROBP/TGFB1/GPNMB/HAVCR2/CD74/PKN1/PRNP/PAG1/HMGB3/TNFAIP8L2/VTCN1/GRN/VSIG4/J  
STP1/CDKN2A/DUSP5/PRKCD/HSPB1/NUP62/CDKN2D/DTNBP1/CD300A/RGS14/PPP2R1A/SPRED1/D  
AO  
O/HAAO

P

JA4/HSPD1/HSPA2/HSP90AA1/HSPA5/HSPA14/PIIE/PPIB/PDCL/HSPA13/PPIC/SNRNP70  
HRSP/SLC27A5  
5/CPLX2/VAT1/TAP1/RAB34/BAX/GDAP1/ANKRD27/STX1A/STX6/RAB7B/STX10/RAB20/CHMP3/VP  
C/ARPC2/COR01B/RAC1/VIL1/CDC42/BRK1/AKIRIN1/DNM2/ENPP2/ATP7A/NCKAP1  
P5K1C/HIP1R/CLTB/AP2M1/AP2S1/DNM2/TNK2/AAK1/SMAP1/CANX/AP2A2/CLTC/GAK/AP2B1/FNB

1

L2A1/MUC1/CDKN2D/ZNF385A/HMOX1/BAX/MIF/CASP2/PRKDC/NUPR1/BRCA1/BCL2L12/DDIAS/DY  
/TGFB1/COL1A2/SERPINH1/LARP6/ADAM15/MMP1/CREB3L1/PLOD1/MRC2/CTSK/P3H1/COL5A1/HI

CYP7A1/APOC3  
/IGF2  
T1G/MT1E/MT1X  
CT2/STK26/PRKCD/EZH2/TRPM2/HSF1/PCNA/ZNF580/SIRPA/HDAC2/TXN/RPS3/CBX8/PCGF2/MAP

HNF1B/CCDC24/ZP3/GINS4/RBBP8/ACTL6A/PELO/HOPX/NCAPG2/RRP7A/NLE1/NASP/EMG1/HCFC1  
1/TGFB1/ANKRD1/CHEK1/CASP2/SLC9A1/MAPK3/IRF1/RAC1/ITGA2/IL1B/CASP1/MAP3K14/LTBR  
R5  
KAT2B/FOXO1/IRS1/IRS2/GCK/DGAT2/PPARGC1A/PFKFB1/GPLD1/RGN/IGF2  
H1B1/NNT/SULT1E1/HBB/SULT1B1/CAT/ALDH2/PCK2/HP/SULT2A1/PCK1/ADH4

2/APOA1/APOA5  
ASS1/SERPINF1/ARG1/KLF9/PCK2/PCK1  
/SOD1/LDLR/HMGCS1/ACACB/APOE/POR/SC5D/DGAT2/TM7SF2/GPAM/APOB/ACADL/EPHX2/SEC14L  
C/RGN/APOA5

320/TFRC/MIF/MAD2L2/SASH3/TNFRSF4/SLC39A10/TNIP2/NCKAP1L/CARD11/TNFSF13B/CD27/M  
B/PSMB4/PSMB8/PSMB10/PSMA5/PSMD13/PSMC4/PSMD10/PSMD11/PSMD1/PSMA7/PSMB3/PSMD4/P  
RT6/PRKDC/MAD2L2/PARPBP/DDX11/OTUB1/AUNIP/KDM1A/WAS/PML/PARP1/POLQ/FUS/OGG1/RPA  
RS1/IRS2/PLIN5/FABP1

CARD/LGALS3BP/CYBA/LIMK1/RGS2/ATP1B3/CXCL8/TINAG/ANXA2/NCF2/IL2RG/FCER1G/ARPC1B  
EG1A/FBLIM1/PLXNA1/SRC/SEMA6A/MELTF/FBLN1/BAMBI/RHOV/RCC2/ARHGAP4/CORO1A/TNFRSF  
25B/SRC/MMD/CKS2/CSF1/ECT2/TGFB1/IQGAP3/STK26/DKK1/RIPK2/UNC119/PSRC1/GDF15/IRA  
ALT5/CERS5/SMPD2/NSMAF/DEGS1/ORMDL2/B4GALT3/ASAH1/GBA/FA2H/SMPD4/ST3GAL5/RACK1/  
SV/DKK1/KRT17/PI3/MAFG/KRT80/ADAM9/USH1C/CD109/ELF3/EZH2/FZD6/NME2/PTHLH/FOXQ1/

CXCL17/AKIRIN1/THBS1

GLL5/RAB31/MFGE8/CD300A/GULP1/F2RL1/NCKAP1L/MSR1/ITGA2/CDC42/FCGR2B/BIN2/SPIRE1

RN/CDC42/HNRNPU/BECN1

RO1A/ITGB2/PLEKH01/PLXNA3/CDC42EP1/HCK/FGD3/FMNL2/CSF1R/EZR/RHOG/FMNL1/RHOQ/RHO  
T57/TMEM201/KIF3C/DTNBP1/MAP2/FLOT2/SSNA1/HIF1A/HSPA8/MAP1S/KLC3/DYNLRB1/IFT52/  
T57/TMEM201/KIF3C/DTNBP1/MAP2/FLOT2/SSNA1/HIF1A/HSPA8/MAP1S/KLC3/DYNLRB1/IFT52/  
RC/MAPK13/CCNA2/ECT2/STK26/SOD3/PRKCD/EZH2/MPV17/TRPM2/HSF1/NCF1/AKR1C3/TRAF2/P  
KN1/PRKCD/STK39/CDC7/CHEK1/TRIM6/SPRED1/CAD/DYRK2/CSNK1E/MARK2/DDIT4/CSNK1D/AXI  
XJ1/MAPK13/TYROBP/RIPK2/HAVCR2/CD74/PTAFR/ARHGEF2/SYK/CARD9/MAPKAPK2/IL27RA/SIR

AT2/PCK1

/GSTM1/GSTA1

/GSTM1/GSTA1

/CCT2/HSP90AB1/CCT4/PNKP/TCP1/PARM1/PTGES3/WRAP53/HSP90AA1/NVL/MAPKAPK5/PPARG/H  
O/ETV5/LIF/SERPINE2/CSF1/TGFB1/CLCF1/P2RX4/EZH2/CXCR4/IL34/BIN1/HDAC1/HDAC2/LYN

B/CHMP4C/DYNC1H1/GPSM2/RAE1/CHMP1A/RNF4/DRG1/CCSAP/DCTN1/HNRNPU/CLTC/PKD1/BORA  
1/NUP188/XPOT/SSB/NUP85/NUP43/RAE1/NUP155/NUP107/SEC13/NOL6

1/NUP188/XPOT/SSB/NUP85/NUP43/RAE1/NUP155/NUP107/SEC13/NOL6

3/MRPL12/MRPS34/TRMT112/MRPL13/GADD45GIP1/MRPL10/MRPL52/MRPL48/DAP3/MRPS7/MRPL5  
AP1/NUP62/CHMP4B/CHMP4C/RTKN/ANXA11/CHMP3/KLHDC8B/CHMP1A/SPIRE1/KIF20B/MITD1/RH  
GCN1/HSF2/MAPK7/NOTCH1/VEGFA/HSF4/HSPA5/RBPJ

/PMAIP1/DNM1L/PDCD5/MFF/BAD

AG2/AGL/ENPP1/STBD1/UGP2/IRS1/IRS2/GCK/PPP1R3B/PPP1R1A/KHK/LEPR/IGF2/GYS2/GCGR/  
POE/CPT1A/IRS2/PLA2G12B/FABP1/ACSL1/SLC27A2/THRSP/FABP4/SLC27A5

1/GOT2/BHMT2/ADI1/SHMT1/NAGS/GLS2/GATM/AASS/MTHFD1/AGXT2/CTH/PAH/OTC/AGXT/CPS1/  
/MYLK/PLPP3/VTN/F2/F7/SERPINF2/APOH/CPB2/F12/PLG/HRG

YK/IL18/CD86/TNFSF9/SASH3/SOCS1/CD83/NCKAP1L/ADAM8/CBFB/IL2RA/CD27/IL12RB1/IL15  
CL2/SOCS3/PLK4/DNAJB6/CASP8/STK3

LYREF/CHEK1/TFRC/SIRT6/MAD2L2/IL27RA/PARPBP/BLM/KDM1A/WAS/PARP1/MSH2/POLQ/FUS/R  
SASH3

1/CSK/TMBIM1/BCL2L1/CLTC/MRAP2

BR4/ACAA1/ACMSD/AKR1C4/CYP2A13/CYP1A1/AKR7A3/CYP2A7/CTH/PON3/CYP1A2/CYP2A6

SORL1/PLIN5/LIPC/FABP1/APOB/APOC1/APOA2/GPLD1/AADAC/FABP4/APOA1/APOA5/APOC3/CPS  
R/KDM8/CYP3A7/CYP3A43/CYP1A1/CYP3A5/CYP1A2/CYP2C8/CYP2C9/CYP3A4

RD5A1/ASS1/SERPINF1/ARG1/KLF9/PCK2/PCK1  
M/ITGB2/C1QA/IL18/GRN/NUPR1/IL1B/C5AR1/CST7/APP/MAPT/CCL3  
MK1/CXCL8/TINAG/ANXA2/NCF2/IL2RG/FCER1G/ARPC1B/TMPRSS3/SH3BP1/TYRO3/SRC/LGALS3/  
RGS2/TRIP13/E2F1/SOX9/ASF1B/CABYR/FOXJ1/TYRO3/B4GALNT1/ETV5/RPL39L/KIFC1/GAL3ST  
YMS/KRT17/EIF4EBP1/PTAFR/PRKCD/HSPB1/NCK2/SLC7A11/IGF2BP1/PRNP/LARP6/CDK4/TCOF1  
CLGN/NCK2/SCAMP5/PDIA2/CASP4/CREB3L1/DDIT3/TRAF2/BAX/CREB3/NUPR1/MANF/HM13/LMNA  
R3/IKBKE/LGALS9/FOXJ1/TSP0/TYROBP/TGFB1/TRAIP/GPNMB/HAVCR2/GSTP1/RELB/ABCD1/ACP  
D3E/PAK1/CTLA4/PDCD1/LYN/CARD11/RAC1/TNFSF13B/LCK/PTPN6/GRB2/CDC42/CSK/PAK2/TNF  
09/RACGAP1/PTAFR/PRNP/CLIC3/SLC26A6/ANO10/MFSD5/SLC12A2/CLCN2/SLC12A9/SLC1A4/P2  
XJ1/MAPK13/TYROBP/RIPK2/HAVCR2/CD74/PTAFR/ARHGEF2/SYK/IL18/CARD9/MAPKAPK2/IL27R  
CSF1R/F2RL1/CTTN/KIFC3/HOMER1/ZMYND8/IGF1R/FCGR2B/DCTN1/VPS35/MTHFR/CD177/CTBP2  
8/SYK/HMGB3/JAK3/TCF3/BAX/PRKDC/TCIRG1/TPD52/BCL3/NCKAP1L/CARD11/NFAM1/CDH17/PT  
L4A2  
/BECN1/SEH1L  
1/IRF3/IRF7/FLOT1/TRAF3/POLR3D/POLR3C/RNF216/MAVS/IRF5/TLR2/NMI/DHX9/TLR7/TLR8/  
NPLOC4/RFC2/MSH2/UBE2A/UBE2L6/RPA2/POLD3/TRIM25/VCP/FAAP20/RPS27A/RAD18/UBA52/R  
100A7  
A/TAF9  
IF5A2/CCL5/MAPK3/NPM1/UPF3B/POLR2G/RBM3/PABPC1/BCL3/EIF3D/ITGA2/EIF2S3/CDC123/E  
AG2/AGL/ENPP1/STBD1/UGP2/IRS1/IRS2/GCK/PPP1R3B/PPP1R1A/KHK/LEPR/IGF2/GYS2/GCGR/  
AG2/AGL/ENPP1/STBD1/UGP2/IRS1/IRS2/GCK/PPP1R3B/PPP1R1A/KHK/LEPR/IGF2/GYS2/GCGR/  
  
RD18  
RD18  
P3/PTPN23/SNX12  
A/PLXNA3/TWF2/TRPV2/SEMA4A/MAP2/EFNA5/PAK1/CRABP2/NRCAM/GDI1/MT3/CDK5/CTTN/SEMA  
/TMEM30B/SCP2/MTTP/APOC1/ABCG8/MFSD2A/APOA2/ABCB4/APOA1/APOA5/APOC3  
/PTK7/PDZD11/MARK2/SLC9A3R1/ARF4/CDC42/PRKCI/WDR1/SYNE4/PARD3/RHOA  
/PTK7/PDZD11/MARK2/SLC9A3R1/ARF4/CDC42/PRKCI/WDR1/SYNE4/PARD3/RHOA  
HPGDS/PTGES3  
GPNMB/HAVCR2/CD74/PRNP/PAG1/TNFAIP8L2/VTCN1/VSIG4/JAK3/CD86/CD300A/SOCS1/IRF1/C  
AT/ACMSD/TDO2/KMO/ALDH7A1/SARDH/HAAO/DMGDH/BHMT  
C/APOC1/APOH/ANGPTL3/APOA5/APOC3  
MAIP1/YWHAQ/YWHAB/GZMB/BAD/CASP8/YWHAG/TFDP1  
1/DAZAP1/VDR  
PO/ALDH3A2/ALDH9A1/ALDH1A1/HOGA1/BCO2/GOT2/TKFC/GLYCK/HAGH/ALDH7A1/GRHPR/PRODH  
/LONP2/MLYCD/BDH2/ETFBKMT/CPT2/HIBCH/PPARA/ACAD11/ACACB/CPT1A/ECHS1/HADH/ACADS/  
POE/MAOB/SULT1E1/TKFC/DBH/CYP4F12/SULT1B1/CYP27A1/CYP39A1/LDHD/ALDH2/CYP4F3/SOR  
4C/DYNC1H1/GPSM2/RAE1/CHMP1A/DRG1/CCSAP/DCTN1/HNRNPU/CLTC/PKD1/BORA  
YROBP/RIPK2/CD74/PTAFR/ARHGEF2/SYK/CARD9/SPON2/F2RL1/RAB7B/IL1B/APP/CLEC7A/LBP/  
  
A3/SLC1A2/ABAT/SLC13A5  
3/MOGAT2/PCK1  
  
H/CPB2/KLKB1/F12  
OC1/APOA2/GPLD1/APOC3  
/COPS7B/ISY1/CDK7/POLR2L/POLR2K/HMGN1/RBX1/RPA2/CUL4B/POLD3/PRPF19/COPS6/RPS27A  
C1B/CHST11/VEGFB/STMN1/SULF1/TYRO3/SRC/ITGA3/HTRA3/SEMA6A/PTP4A3/PLAUR/DAB2/DNM  
1/PLA2G7/CCR1/S100A7/CXCL17/LGMN/CXCL10/MOSPD2/CCR2  
STN/REG1A/STMN1/PLXNA1/SRC/SEMA6A/RAC2/PDLIM7/ENAH/ARHGAP4/AURKA/STK26/EFNA3/TN

RGS2/TRIP13/E2F1/SOX9/ASF1B/CABYR/FOXJ1/TYRO3/B4GALNT1/ETV5/RPL39L/KIFC1/GAL3ST  
C5/PTTG1/PYCARD/RENBP/CRYAB/LGALS9/BAK1/MICAL1/SRC/TIMP1/PLAUR/SPINT2/ATP13A2/P  
D2/NCAPH/FANCD2/SGO2/PPP2R1A/NDC1/SMC4/NCAPH2  
ECR2/CRAT/ECH1/LONP2/HMGCL/MLYCD/ACOT2/NUDT7/ECI2/ACOX1/ACAA1/HSD17B4/AMACR/PEC  
FS/ART4/GLUL/GLUD1/AADAT/ASS1/GOT2/ARG1/NAGS/GLS2/PRODH2/ALDH5A1/ADHFE1/AMDHD1/  
/SOD1/HMGCS1/PRKAG2/ACACB/APOE/POR/SC5D/CES1/MSM01/ACAA2/TM7SF2/GPAM/FAXDC2/APO  
/FGG/PROC/FGA/F2/F11/TMPRSS6/SERPINF2/APOH/CPB2/KLKB1/ABAT/F12/KNG1/PLG/HRG  
ECR2/CRAT/ECH1/LONP2/HMGCL/MLYCD/ACOT2/NUDT7/ECI2/ACOX1/ACAA1/HSD17B4/AMACR/PEC  
ECR2/CRAT/ECH1/LONP2/HMGCL/MLYCD/ACOT2/NUDT7/ECI2/ACOX1/ACAA1/HSD17B4/AMACR/PEC  
HGAP4/LGALS1/DKK1/PRKCD/PLXNA3/PRNP/ASAP1/CRMP1/LINGO1/SEMA4A/MAP2/THY1/RTN4RL2  
CD/HLA-DRB1/HLA-DQA1/HCK/ZYX/HLA-DRA/IFNGR2/HLA-DQB1/IFI30/SLC26A6/GBP5/HLA-DPA  
13/ITGAM/ITGB2/CPLX2/PTAFR/SCAMP5/SYK/UNC13D/GIT1/GIPC1/DTNBP1/HMOX1/CD300A/ZP3  
P39A1/CYP1A2/AKR1D1/CYP7A1/HSD17B6/CYP3A4  
FTCD/GNMT  
GOT2/ARG1/GLS2/PRODH2/ADHFE1/DAO  
/APOA2/AADAC/ANGPTL3/APOA5

DX1/FLVCR1/HIF1A/JMJD6/ISG15/STAT1/AMPD3/NCAPG2/NCKAP1L/HCLS1/LYN/LYAR/PTBP3/MB  
2/STX1A/RAB3B/RAB10/VPS18/PPF1A3/RALB/RAB3D/VPS45/CFTR/CTBP2/RAB3A/VPS11/STXBP1

IRC3/CD74/HRAS/NUP62/RCC1/S100A10/TRAF2/C1QTNF1/GNB1/CHMP3/COL6A2/FARSB/CPSF6/P

NCKAP1L/LYN/TNFSF13B/ABL1/TNFAIP3/BCL10  
MAIP1/YWHAQ/YWHAB/GZMB/BAD/CASP8/YWHAG/TFDP1  
S/CFI/CPN1/CFB/C3/CFH/VTN/CD5L/CFHR1/C4BPB/CFHR2/C7/C8B/F2/CPN2/CPB2/C8A/C4BPA/  
C25A13/GOT1/PPARA/PC/KAT2B/FOXO1/GOT2/GCK/DGAT2/PPARGC1A/GPD1/MST1/LEPR/ENO3/SD  
/SOD1/HMGCS1/ACACB/APOE/POR/SC5D/CES1/MSM01/ACAA2/TM7SF2/GPAM/APOB/INSIG1/SEC14  
/FCN3/C5/FCN2/SERPING1/C1S/COLEC10/CFI/CPN1/CFB/C3/CFH/VTN/CD5L/CFHR1/C4BPB/CFH  
OR/SRD5A1/HSD17B8/DIO1/PPARGC1A/CYP27A1/SRD5A2/HSD11B1/HSD17B6/CYP3A4  
ECR2/CRAT/ECH1/LONP2/HMGCL/MLYCD/ACOT2/NUDT7/ECI2/ACOX1/ACAA1/HSD17B4/AMACR/PEC  
/SOD1/HMGCS1/ACACB/APOE/POR/SC5D/CES1/MSM01/ACAA2/TM7SF2/GPAM/APOB/INSIG1/SEC14  
83/BCL3/CLEC7A/HSPD1/TUSC2/IL20RB/TLR2  
TGFB1/RACGAP1/NUP62/PGF/GIPC1/YBX1/TGFA/LBH/KIF14/ITGB1BP1/IL1B/PDGFA/TGFB2/FGF  
B/PSMB4/PSMB8/PSMB10/PSMA5/PSMD13/PSMC4/PSMD10/PSMD11/PSMD1/PSMA7/PSMB3/PSMD4/P  
1/POSTN/STMN1/TYRO3/PLXNA1/SRC/SEMA6A/SPINT2/RAC2/MELTF/FBLN1/POF1B/PDLIM7/ENAH  
P62/EZH2/DNMT1/MUC1/CHEK1/PLOD1/RANGAP1/YEATS2/SAE1/TRIM28/NUP210/NAA40/RUVBL1/  
/LAMC1/HNF1B/COL5A1/ITGA5/MMP2/ITGB5/PELO/HDAC1/COL5A2/COL4A2/LAMB3/HSBP1/MED12  
B/HAVCR2/PKN1/PRNP/VTCN1/VSIG4/CD86/CD300A/MNDA/CTLA4/PLA2G2D/LYN/IL2RA/PTPN6/L  
B/HAVCR2/PKN1/PRNP/VTCN1/VSIG4/CD86/CD300A/MNDA/CTLA4/PLA2G2D/LYN/IL2RA/PTPN6/L  
HX34/YBX1/PABPC1/RNPS1/NELFE/U2AF2/SLC11A1/SRSF9/SRSF12/BARD1/SUPT5H/RBM42/PTBP  
N/LGALS9/SRC/GAPDH/RIPK2/HAVCR2/ITGAV/SCAMP5/SYK/TMSB4X/CSF1R/EZR/VTCN1/GBP5/TR  
X2/APOBEC3B/RNASE6/CARD9/APOBEC3C/TRIM6/SLFN13/UNC93B1/NT5C3A/TRIM11/ISG15/SPON  
/UCP2/TOMM40/SLC25A6/MID1IP1/MCUB/MICALL2/SAE1/BAX/SLC25A24/SLC9A1/FLVCR1/TOMM3  
F1R/PSMB9/PSMD14/TCF3/PRKDC/PSMD2/RRS1/FSTL3/PSMB2/PSME3/CBFB/PSMB4/PSMB8/PSMB1  
11/SLC6A9/PRAF2/SLC7A5/SLC1A7/SLC1A4/SLC43A2/SLC1A3/SLC25A22/SLC7A8/SLC3A2/SLC7  
LXNA3/ASAP1/CRMP1/LINGO1/SEMA4A/MAP2/THY1/RTN4RL2/GDI1/MT3/HDAC2/RAP1GAP2/YWHAH  
F11B/TFRC/CTSK/TCIRG1/ATP6AP1/UBASH3B/TNFRSF11A/SNX10/ADAM8/RAC1/CALCA/TMEM119/  
FLNA/IRAK1/CDKN2A/PRNP/EZH2/TMSB4X/FZD6/GLIS2/FOXO1/MDFI/DDIT3/RBCK1/HMOX1/BRMS  
KAT2B/FOXO1/IRS1/ENTPD5/IRS2/GCK/DGAT2/MLXIPL/PPARGC1A/GPD1/PFKFB1/GPLD1/RGN/IG

4/B4GALT5/GALNT10/B3GNT5/B3GNT7/ST3GAL4/MUC3A/MUC5B/GALNT6/MUC20/POMGNT1/GALNT7  
SLC9A3R1/BID/BCAP31/BBC3/PMAIP1/SFPQ/LCK/RPS3/DNM1L/RACK1/MSX1/RAD9A/IL20RA/RPS  
/VCAN/B3GAT3/GPC1/ABCC5/B4GALT5/B3GNT5/CHST1/B3GNT9/B3GNT7/FMOD/CHPF2/B4GALT3/S  
G/GAMT/ASS1/GOT2/FOLH1/BHMT2/ADI1/GPT2/SHMT1/NAGS/GLS2/GPT/GATM/AASS/MTHFD1/AGX  
DL3/SOD1/ETFBKMT/ACACB/PDE3B/APOE/GPER1/PROX1/APOC2/SORL1/DGAT2/PLIN5/ACADL/APO  
APOE/RORA/APOC2/LIPG/GPIHBP1/APOM/DGAT2/ACSM3/LIPC/PLA2G12B/CYP39A1/MTTP/APOB/A  
OC/FGA/F2/F11/TMPRSS6/F7/SERPINF2/APOH/CPB2/KLKB1/ABAT/F12/KNG1/PLG/HRG/SERPINC

/ALDH2/SULT2A1  
17B6

/TRAF2/TRIM6/CXCR4/HIF1A/IRF3/IRF7/CPNE1/NLRC5/CD300LF/AGPAT2/CASP1/AXL/FADD  
D/MMAA/SLC19A2/ENPP1/MTHFS/AMN/CLYBL/PC/SLC23A2/KMO/SHMT1/CYB5A/HAAO/ALDH1L1/MT  
YT7/SHH/CD36/APOE/APOC2/STARD5/LIPG/CES1/APOM/LIPC/SCP2/APOB/APOC1/ABCG8/ABCG5/  
2/PLIN5/MLXIPL/PPARGC1A/FABP1/RGN/APOA5  
OC/FGA/F2/F11/TMPRSS6/F7/SERPINF2/APOH/CPB2/KLKB1/ABAT/F12/KNG1/PLG/HRG/SERPINC  
GB2/CD74/C1QA/SYK/GRN/VSIG4/MIF/JMJD6/ZC3H12A/TNIP2/SLC11A1/C5AR1/SBN02/CST7/IL

RAP2A/TNIK

1/RPS3/USP1/RBX1/RPA2/CUL4B/POLD3/RPS27A/RAD18/UBA52/RFC5/RPA1/HMGA2/DDB1/MRPS2  
YGL/PGM1/PRKAG2/AGL/ENPP1/STBD1/UGP2/IRS1/IRS2/GCK/PPP1R3B/PPP1R1A/KHK/LEPR/IGF  
OS2/PEX19/DECR2/CRAT/ECH1/SEC16B/LONP2/HMGCL/MLYCD/ACOT2/NUDT7/PEX11A/PEX11G/EC  
OC/FGA/F2/F11/TMPRSS6/F7/SERPINF2/APOH/CPB2/KLKB1/ABAT/F12/KNG1/PLG/HRG/SERPINC  
ALDH3A2/ALDH1B1/NAAA/CYP11A1/CBR4/ALDH1A1/SULT1E1/DGAT2/AKR1C4/PECR/GPD1/SULT1B  
APOE/RORA/APOC2/LIPG/GPIHBP1/APOM/DGAT2/ACSM3/LIPC/PLA2G12B/CYP39A1/MTTP/APOB/A  
OE/POR/APOC2/AVPR1A/DGAT2/PLIN5/MLXIPL/PPARGC1A/GPLD1/RGN/APOA1/APOA5/CYP7A1/HS  
/TREM2/PYCARD/CYBA/CXCL6/LY96/LCN2/PGC/CXCL8/RGS1/C15orf48/EPO/MMP12/ENO1/IKBKE  
STN/REG1A/STMN1/PLXNA1/SRC/SEMA6A/RAC2/PDLIM7/ENAH/ARHGAP4/AURKA/STK26/EFNA3/TN  
/TREM2/PYCARD/CYBA/CXCL6/LY96/LCN2/PGC/CXCL8/RGS1/C15orf48/EPO/MMP12/ENO1/IKBKE  
B1/YWHAZ/FLNA/HK2/PRKCD/LAMP5/SYK/NUP62/CCT5/MPV17/TOMM40/SCRIB/SLC25A6/RPL8/RA  
/PDGFA/TGFB2/PLXND1/FGFR2/TGFB3/SEMA3C/TWSG1  
PARBP/KDM1A/WAS/PARP1/POLQ/FUS/RPA2/PPP4C/TIMELESS/WRAP53/UBQLN4/MAGEF1  
/SRC/ITGA3/RAC2/MMP14/MELTF/CSF1/FBLN1/ARL2/RCC2/LGALS1/CORO1A/TNFRSF12A/FLNA/C

AVCR2/GSTP1/CD74/SYK/CSF1R/HMOX1/MIF/HIF1A/SIRPA/F2RL1/IL1B/IL4R/APP/CLEC7A/LBP  
/SLC38A3/ABAT/SLC6A1  
FOXJ1/EPCAM/PLXNA1/SRC/SEMA6A/LGALS3/SPINT2/MMP14/MELTF/SERPINE2/FBLN1/TGFB1/RC  
FBKMT/PRKAG2/PPARA/ACACB/CPT1A/APOC2/IRS1/AVPR1A/GSTZ1/IRS2/DGAT2/PLIN5/MLXIPL/

2/STX1A/STX6/RAB3B/STX10/NDRG4/RAB10/VPS18/SYT1/PPFIA3/STX4/RALB/NSF/RAB3D/STX7  
LG/JAML/IL27RA/THY1/SIRPA/ADAM8/CCL2/PIK3CD/CCL28/CD47/ABR/FADD/PTGER4/VCAM1/CD



QSTM1/KCNJ11/PRNP/EZR/RHOG/ANXA13/EPB41L2/CNPY4/GPSM2/RANGRF/VIL1/STAC3/ACSL3/P  
/ARHGEF2/PRKCD/TRIM54/MAPRE1/TMSB4X/TWF2/MID1IP1/CARMIL1/WASF2/MAP2/NPM1/BRCA1/  
IRF5/DHX9/TLR7/TLR8  
TGFB2/RAB10/FGFR2/AKNA/NOTCH1/TEAD3  
X8/HOXB7/VEGFA/SIX1  
M1  
1/APOA5  
N2/CASP8/INHA

POA1/APOC3  
/IGF2  
7

AMN/APOE/APOC2/LIPG/GPIHBP1/APOM/DGAT2/APOC4/LIPC/MTTP/APOB/APOC1/LPA/APOA2/CES  
APOA2/CYP4F2/APOC3  
DOA/FCGR2B/THBS1/CCL19/YTHDF1/HLA-DOB/NOD1/NOD2/FGL2/LILRB2  
EG/IL34/LYN/IL1B/ASCL2/PPP1CC/PRKCI/NF2/NOTCH1/LGI4  
1/APOA5  
3R1/CDC42/PRKCI/SYNE4/RHOA  
/PPARGC1A/FABP1  
P1/RAB34/ANKRD27/STX1A/STX6/RAB7B/STX10/RAB20/CHMP3/VPS18/CALR/SYT1/STX4/BNIP1/  
/COL5A1/ITGA5/MMP2/ITGB5/COL5A2/COL4A2/LAMB3/HSBP1  
O1/PTGER4  
/GRB2/STAT5A  
/GRB2/STAT5A  
RC/TSP0/ATP13A2/TRIB3/GAPDH/RIPK2/SQSTM1/HK2/DRAM1/HSPB1/QSOX1/RGS19/FUNDC2/S10  
/TREM2/PYCARD/CYBA/CXCL6/LY96/LCN2/PGC/CXCL8/RGS1/C15orf48/EPO/MMP12/ENO1/IKBKE  
L39L/ACSL4/ACSS1/GAL3ST1/PPT1/GAPDH/IGF2BP2/TYMS/KRT17/EIF4EBP1/PTAFR/PRKCD/HSP  
RC/TSP0/ATP13A2/TRIB3/GAPDH/RIPK2/SQSTM1/HK2/DRAM1/HSPB1/QSOX1/RGS19/FUNDC2/S10

G3/CSF1R/NCF1/CCL5/RAP2B/THY1/TGFA/RELN/NCAPG2/SHC1/GPRC5B/DVL2/LRP8/VPS25/APP/  
CAM1/FOXJ1/CD3D/TGFB1/RIPK2/ADA/EXO1/HLA-DMA/HAVCR2/CLCF1/CD7/C1QB/SUSD4/C1QC/C  
9A1/SLC35F6/BMF/NOL3/HIP1R/BID/MT3/DYNLT1/YWHAH/BBC3/PMAIP1/ZNF205/GSK3A/YWHAQ/  
SCRIB/RAB15/STXBP2/STX1A/RAB3B/SV2A/LYN/RAB10/VPS18/SYT1/PPFIA3/BTK/STX4/RALB/R  
AP8L/NCAPH2/CHMP1A  
/RFC2/UBE2L6/RPA2/POLD3/TRIM25/VCP/FAAP20/RPS27A/UBA52/RFC5/RPA1/POLE2/PARP10  
CARD11/IL1B/RPS3/PRKD2/CLEC7A/ABL1/GLMN/PTPRC/MAP3K7/IRF4/PDE4B/CD4/ANXA1/CCR2/  
1/NUP188/XPOT/SSB/NUP85/NUP43/RAE1/NUP155/NUP107/SEC13/NOL6

/ADRB1/CTSG/RASL10B/AGTR1/ADRA1B/ADRA1A/ACE2/AVPR1A/CES1/ENPEP/MME/ADRB2/REN/CY  
/IGF1/PPARA/ENPP1/GPER1/KAT2B/FOXO1/IRS1/IRS2/GCK/DGAT2/PPP1R3B/PPARGC1A/MST1/L  
CBR4/TDO2/SHMT1/CAT/ALDH5A1/ACADL/DCXR/MAT1A/CTH/FBP1/DPYS/UPB1/GNMT  
/ELOVL2/ACSS3/AVPR1A/ACSL6/GCDH/ACAT1/HSD17B8/ACSL5/ACSL1/BDH1/HMGCS2/CYP2C8/SL  
1/SLC9A3R1/RAP2A/GLDN/VIL1/TNIF

TD2/PAX8/HOXB7/VEGFA/SIX1  
K1/CTLA4/PDCD1/LYN/CARD11/RAC1/TNFSF13B/LCK/PTPN6/GRB2/CDC42/CSK/PAK2/TNFRSF14/  
ROM1/PRKX/BASP1/STAT1/SIX2/PDGFA/TACSTD2/PAX8/HOXB7/WNT4  
/MAPK3/PAK1/PSMB2/PSME3/SHC1/LYN/CARD11/RAC1/PSMB4/PSMB8/PSMB10/LCP2/PSMA5/PSMD

1/IRF3/IRF7/FLOT1/TRAF3/POLR3D/POLR3C/RNF216/MAVS/IRF5/TLR2/NMI/DHX9/TLR7/TLR8/  
2B/FOXO1/GOT2/GCK/DGAT2/PPARGC1A/GPD1/MST1/LEPR/ENO3/SDS/PFKFB1/SORD/PCK2/FBP1/  
/FGG/PROC/FGA/F2/F11/TMPRSS6/SERPINF2/APOH/CPB2/KLKB1/ABAT/F12/KNG1/PLG/HRG  
1/DBN1/STMN1/PLXNA1/SRC/TSP0/SEMA6A/RAC2/PDLIM7/ENAH/ARHGAP4/EFNA3/FOLR1/TNFRSF  
NFKBIE/TGFB1/TRAIP/TONSL/RIPK2/HAVCR2/FLNA/ITGB2/IRAK1/CDKN2A/ZIC2/ARHGEF2/FANC  
8/SIRT6/NAA40/HDAC1/HDAC2/CHRA1/DNMT3A/ATAD2/RBBP4/BEND3/MTF2/HELLS/PCGF2/RBBP  
IF/ECT2/ARL2/TGFB1/FLNA/PRKCD/SYK/NUP62/GTSE1/CCT5/RAN/GLIS2/CCT6A/RANGAP1/CCT3  
IPK2/GDF15/IRAK1/S1PR2/CD74/PKN1/DUSP5/ROBO1/ADORA1/ADAM9/HRAS/SYK/STK39/EZH2/M  
G1A/PLXNA1/SEMA6A/ARHGAP4/AURKA/TNFRSF12A/PLXNA3/DDR1/TWF2/TRPV2/CXCR4/SEMA4A/S  
DNRB/C5/SERPING1/C1S/CFI/CPN1/CFB/C3/CFH/VTN/CD5L/CFHR1/C4BPB/CFHR2/C7/C8B/F2/C  
SPA/MTHFS/SUCLG2/GLUL/GLUD1/HOGA1/AADAT/ASS1/GOT2/ACMSD/KMO/GRHPR/GPT2/PHYH/SHM  
2/APOE/ACE2/AVPR1A/CRY2/IRS2/KMO/ARG1/SLC38A3/ABAT/ABCB4/SLC6A1/APOA1/CYP4F2/CY  
OS1/VWF/FCN3/C5/FCN2/SERPING1/C1S/COLEC10/CFI/F10/CPN1/CFB/C3/CFH/VTN/FGB/CD5L/  
IL18/TRAF2/RBCK1/CARD10/EDA/IL1B/CD27/RPS3/CALR/APP/LIMS1/TRIP6/TRADD/TNFSF15/T  
1/BLM/DONSON/TIPIN/RFWD3/TIMELESS/DNA2/EME2/SMARCA1/THOC1/MMS22L  
K1/DCTN1/NEK6  
K1/DCTN1/NEK6  
S7/BAG2/RPL5/RPL11/PARK7  
SYT1/RAB3A/VPS11/STXBP1/VPS16/C2CD5/KIF5B/ANXA1/VAMP1  
ELFE/POLR2H/TRIM31/NELFB/CCL4/SMARCB1/TFAP4/POLR2L/POLR2K/SUPT5H/CCL3/TRIM21/TA

AC2/YWHAZ/HK2/MICALL2/SAE1/BAX/HIF1A/BMF/HIP1R/BID/UBE2J2/NPEPPS/YWHAH/BBC3/PMA  
ES2/BCO2/GPIHBP1/CYP3A7/APOM/DGAT2/AKR1C4/CYP4V2/RDH5/APOB/CYP1A1/APOA2/ALDH8A1  
BCC2/SLC25A13/SLC19A2/SLC1A1/APBA1/SLC25A30/AVPR1A/SLC13A3/KMO/GLS2/SLC1A2/ABAT  
ACACB/SLC25A20/APOE/CPT1A/IRS2/GOT2/SLC02A1/SLC22A9/PLA2G12B/FABP1/ACSL1/MFSD2A  
YT7/SHH/CD36/GRAMD1C/APOE/APOC2/STARD5/LIPG/CES1/APOM/LIPC/SCP2/APOB/APOC1/ABCG  
RS1/IRS2/GCK/PPP1R3B/PPP1R1A/KHK/LEPR/IGF2/GYS2/GCGR/G6PC/GNMT  
2B/FOXO1/GOT2/GCK/DGAT2/PPARGC1A/GPD1/MST1/LEPR/ENO3/SDS/PFKFB1/SORD/PCK2/RGN/F  
SS1/PDE2A/DUSP1/FOSB/REN/ITPR2/GPD1/CRHBP/PKLR/PFKFB1/CD01/AGXT/CPS1/PCK1/AQP9  
ROB2/GPER1/VSNL1/GLUL/GLUD1/IRS2/SYBU/GCK/FGB/FGG/FGA/MYRIP/TFR2/GPLD1/ANO1/ABA  
  
IL18/TMSB4X/HDAC7/TRAF2/RBCK1/PRDX1/CARD10/EDA/NOL3/ZC3H12A/BCL3/CPNE1/IL1B/CD2  
APP/CLEC7A/BCL10/EREG/INPP5D  
QSTM1/KCNJ11/PRNP/EZR/RHOG/ANXA13/CNPY4/RANGRF/VIL1/STAC3/ACSL3/PRKCI/STX4/RACK

NA/FERMT3/ITGAV/LAMB1/UNC13D/LAMC1/FZD7/MICALL2/S100A10/CARMIL1/EFNA5/LAMC2/LAM  
EZH2/FZD7/CD53/BHLHE41/PAK1/FLOT1/EHD1/CXCL9/EHD2/GSK3A/CYP26B1/MAMSTR/ARRB2/KA

SF21/E2F1/SLC2A1/MMP12/POSTN/LGALS9/ANXA5/ITPR3/SRC/PTP4A3/RAC2/ATP13A2/ECT2/AR  
RIB3/GAPDH/RIPK2/HK2/DRAM1/HSPB1/QSOX1/CTSA/ATP6V0B/DDIT3/TPCN1/ATP6V0D2/CHMP4B

R2H/NCBP2/USB1/NHP2/SNAPC2/TAF9/INTS1/CDK7/EXOSC5/SRRT/POLR2L/POLR2K/NABP1/EXOS  
/B4GALT5/NEU1/GM2A/CERS5/PPP2R1A/SMPD2/NSMAF/DEGS1/ORMDL2/B4GALT3/ASAH1/CLN3/GB  
RMT1/HMGB2/IL34/HIF1A/ATP6AP1/ISG15/STAT1/RAB7B/LEF1/NCKAP1L/EVI2B/HCLS1/JAG1/C  
107/CCT8/BAD

8/CD86/TNFSF9/SASH3/SOCS1/CD83/NCKAP1L/ADAM8/CBFB/IL2RA/CD27/IL12RB1/IL4R/PNP/L  
TP6V0B/ATP6V0D2/CHMP4B/HMOX1/ATP6V1C1/RRAGD/HIF1A/MAPK3/NUPR1/RRAGC/NPC1/GPSM1/  
NFRSF12A/ROBO1/PLXNA3/TWF2/TRPV2/LINGO1/SEMA4A/MAP2/BRSK1/EFNA5/PAK1/CRABP2/NRC  
RF/KIF14/CST7/RARG/TMEM98/FIG4/LGI4/ZPR1/PARD3/SLC25A12

APK3/C3AR1/NCKAP1L/RAC1/C5AR1/CMKLR1/LBP/S100A7/CXCL17/AKIRIN1/THBS1

RPM2/F2RL1/BATF2/LYN/LTBR/BATF3/AXL/FCGR2B

2K2/ANKRD27/SNF8/CHMP3/PTPN23/SNX12/WDR91/HOOK2/LMTK2/VPS11/BECN1/SNX3/SNX16/MY  
CLGN/NCK2/CREB3L1/HSF1/DDIT3/BAX/HSPA6/CREB3/HSPA8/LMNA/DDX11/HYOU1/ARFGAP1/EXT  
RKCD/TMSB4X/ADAM15/CRMP1/MDFI/DDIT3/DTNBP1/HMOX1/BAX/MAP2/MAD2L2/MAPK3/SLPI/GPS  
C1LI1

C1LI1

C1LI1

GAPDH/RIPK2/HAVCR2/SCAMP5/SYK/CSF1R/VTCN1/TRIM6/MIF/CD2/MAPK3/CD58/IRF3/F2RL1/F  
H3B1/PRKCD/PIGU/SGPP2/GAL3ST4/ELOVL1/DPM2/PIGS/GPAA1/B4GALT5/CERS5/B3GNT5/GBGT1  
P93/NUP205/NUP37/NDC1/NUP188/DYNLT1/KPNB1/CD209/TCP1/THOC5/NUP85/NUP43/VPS28/TH  
P93/NUP205/NUP37/NDC1/NUP188/DYNLT1/KPNB1/CD209/TCP1/THOC5/NUP85/NUP43/VPS28/TH  
C25B/SRC/TTK/AURKA/PAQR5/NCAPH/ASPM/TNFAIP6/HSF1/ZP3/PPP2R1A/FBXO5/NCAPH2/ETV6/  
/HBB/DBH/SLC7A2/SHMT1/AGXT2/RGN/ABAT/PAH/AGXT/UPB1

/SELE/ADRA1A/POR/APOC2/AVPR1A/GPIHBP1/ESR1/PLIN5/ANGPTL4/PCSK6/LIPC/APOC1/ANG/A  
RKDC/MAD2L2/IL27RA/LEF1/MSH2/SWAP70/XRCC4/EXOSC3/HSPD1/NBN/ERCC1/RNF8/MSH6/TP53  
RKDC/MAD2L2/IL27RA/LEF1/MSH2/SWAP70/XRCC4/EXOSC3/HSPD1/NBN/ERCC1/RNF8/MSH6/TP53  
DSG2/STC2/CTSV/HAVCR2/BSG/MAPK3/PPARD/LDOC1/PAM/DAZAP1/VDR/UBE2A/ANGPT2/APOL2/W  
LYN/BTK/FCGR2B

MP4B/CCL5/TRIM11/CHMP4C/PPIH/PABPC1/PPIA/CHMP3/SRPK1/NOTCH1/TRIM21/TARBP2/VPS37

0/MNDA/CTLA4/NCKAP1L/PIK3CD/LYN/CBFB/BCAR1/NFAM1/LCK/PTPN6/CD79A/BTK/ABL1/FCGR2  
TR1/ADRA1B/ADRA1A/ACE2/AVPR1A/CES1/ENPEP/MME/ADRB2/REN/SERPINF2

AT1/CSAD/MAT1A/CTH/CD01/AGXT

8/CCL2/CXCL13/CCL4/PADI2/STK10/XCL2/APP/FADD/ECM1/CCL3/S100A7/SLC8B1/ADAM17/RHO

1/CCT5/ANKRD1/CCT6A/CCT3/CHTF18/MAPK3/DKC1/ACD/FGFR4/CCT2/HSP90AB1/RFC2/CCT4/PN  
/PRNP/CLIC3/SLC26A6/ANO10/SLC12A2/CLCN2/SLC12A9/SLC1A4/P2RY6/SLC12A8/SLC1A3/GAB  
D2

C/GPLD1/CYP7A1

LC11A1/CLN6/ATP6V0E1/TMEM199/ATP6V0D1

P8/BCL2L1/ATG7/CCL8/PABPN1/VAPA/KPNA4/CD4

2/FOXM1/SOX9/EPO/CRYAB/DUSP9/IL2RG/CDK1/ICAM1/LGALS9/MAPK12/SRC/SEMA6A/MAPK13/L  
/TNFRSF21/IKBKE/FCER1G/ARPC1B/TYRO3/SRC/CD3D/LGALS3/S100A14/ITGAM/FCGR3A/RIPK2/  
NTS/DBN1/ICAM1/ARPC1B/PFN2/SH3BP1/SEMA6A/ATP13A2/IQGAP3/ARHGAP4/CORO1A/SCPEP1/T  
TYRO3/SRC/ITGA3/DAB2/CCNE1/DEPDC1B/ITGAM/BAMBI/DKK1/FOLR1/GPC4/GPC3/S1PR2/TAX1B  
XNA1/ITGA3/TNFRSF12A/ROBO1/SERPINI1/PLXNA3/NME1/ITPKA/EZH2/NME2/TWF2/ANKRD1/TRP  
H3B1/PRKCD/SGPP2/ELOVL1/B4GALT5/CERS5/SMPD2/NSMAF/DEGS1/ORMDL2/B4GALT3/ASAHI/GB  
P1/RAB34/ANKRD27/STX1A/STX6/RAB7B/STX10/RAB20/VPS18/CALR/SYT1/STX4/STX7/GNAI3/R  
2/MRPS34/MRPL13/GADD45GIP1/MRPL10/MRPL52/MRPL48/DAP3/MRPS7/MRPL53/MRPS17/MRPS21  
6/SLC7A1/SLC7A11/SLC6A9/STK39/PRAF2/SLC7A5/SLC1A7/SLC1A4/SLC43A2/SLC1A3/SLC25A2  
P2K2/POLR2G/PABPC1/NUP93/NUP205/NUP37/NDC1/POLR2H/NUP188/ZC3H12A/NCBP2/CNOT9/ME  
/BHMT  
GFBP2/PKLR/FABP4

GEF2/PRKCD/TRIM54/MAPRE1/TMSB4X/TWF2/MID1IP1/CARMIL1/WASF2/MAP2/HSPA8/CORO1B/HI  
CI/RIPK2/BIRC3/FKBP1A/UBE2I/BRCA1/RPS2/ZC3H12A/HSPBP1/AXIN1/KDM1A/BIRC7/PIAS3/W

U/FTSJ1/METTL1/POLR3K/PUS1/POP7/URM1/TRMT1/SSB/TRMT61A/POP1/CPSF1/TRMT112/TRMT6

CK2/CREB3L1/DDIT3/BAX/CREB3/LMNA/DDX11/HYOU1/ARFGAP1/EXTL3/CCL2/SHC1/ATF4/WFS1/  
4/CCT7/TCP1/CCT8/GNL3/WRAP53  
/VCAN/B3GAT3/GPC1/ABCC5/B4GALT5/CHST1/B3GNT7/FMOD/CHPF2/B4GALT3/ST3GAL4/EXTL3/B

/PDPN

CYP4F2/CYP4A11

K/PPP1R3B/IGF2

K/PPP1R3B/IGF2

BAX/CASP2/UBE2M/NUPR1/ATF4/CDK5/TGFB2

GS2/SOX9/CRYAB/ENO1/DBN1/POSTN/REG1A/PLXNA1/SEMA6A/MMP14/CLSTN1/SERPINE2/TGFB1/

APP/CLEC7A

R1A/PEA15/PPP1CA/BID/DAPK3/PMAIP1/PML/LTBR/TNFSF12/FADD/BCL10/CTNNA1/THBS1/PAK2  
DBN1/CDK1/REG1A/MMP14/CSF1/TNFRSF12A/KRT17/AGRN/PLCB1/EXOSC4/S100A8/TWF2/EZR/TR  
SLPI/ISG15/PPIH/PABPC1/PPIA/ZC3H12A/PLSCR1/APOBEC3G/IFI16/BANF1/ILF3/ISG20/APOB  
2/MRPS34/MRPL13/GADD45GIP1/MRPL10/MRPL52/MRPL48/DAP3/MRPS7/MRPL53/MRPS17/MRPS21  
GN/PLCB1/CCT5/CCT3/MFGE8/ZP3/SYT8/CCT2/UBAP2L/CCT4/SPAG1/CCT7/KDM5B/TCP1/FOLR2/  
GAM/RIPK2/HAVCR2/BIRC3/ITGB2/IRAK1/S100A8/CTSK/MAPKAPK2/COLEC12/CD300A/UNC93B1/  
RAD54L/FANCD2/HRAS/RAD51AP1/HSF1/RHN01/NABP2/BAX/PRKDC/BRCA1/XRCC2/TICRR/EEF1D/

/SLC02B1/SLC01B3/SLC01B1

ITGA5/PDCD10/ADAM17/RHOA/PDPN/HBEGF

ITGA5/PDCD10/ADAM17/RHOA/PDPN/HBEGF

3/LPIN2/APOE/CPT1A/APOC2/LIPG/SORL1/DGAT2/C3/PLIN5/LIPC/AGMO/GPAM/FABP1/CAT/APO  
CNB1/DRD1/ACE2/AVPR1A/KMO/ARG1/CHRNA4/SLC38A3/ABAT/SLC6A1/AQP9  
SULT1A2/DDC/RAPGEF2/FAH/MAOA/GCH1/DRD1/MAOB/SRD5A1/DBH/HPN/DIO1/SULT1B1/IYD/ABA  
P/FABP1/ABCG8/ABCG5/APOA2/PBLD/RBP4/MOGAT2/APOA1/APOA5/SLC2A2  
SOD1/PID1/ETFBKMT/PPARA/ACACB/APOE/PROX1/ACMSD/GCK/DGAT2/PLIN5/MLXIPL/PPARGC1A/  
ATP6V1F/SLC26A6/GRN/ATP6V0B/ATP6V0D2/ATP6V1C1/SLC9A1/TMEM165/MAPK3/TCIRG1/SLC4A  
RT7/ST14/PERP/KRT18/CAPN1/KRT8/CAPNS1/CYP26B1/EVPL

F/STX4/MAP1A/CD247/TM9SF4/ABCA7

/TRAF2/TRIM6/CXCR4/HIF1A/IRF3/IRF7/CPNE1/NLRC5/CD300LF/TAF9/AGPAT2/CASP1/AXL/FA  
CAM1/LGALS9/SRC/MAPK13/RIPK2/SQSTM1/IRAK1/PLCB1/ANKRD1/PSMB9/PSMD14/CCL5/CCL26/  
HAQ/YWHAB/GZMB/BAD/CASP8/YWHAG/TFDP1  
HAQ/YWHAB/GZMB/BAD/CASP8/YWHAG/TFDP1  
/APOA5  
/APOA5  
/APOA5  
FD1

PRE1/FAM83D/STIL/SNX10/CSNK1D/DCTN2/CEP250/NSFL1C/BICD1/HNRNPU/MAP1A/MARK4/NEDD  
/NPLOC4/RFC2/POLA1/UBE2L6/RPA2/POLD3/TRIM25/VCP/FAAP20/RPS27A/UBA52/RFC5/RPA1/P  
B2/C1QA/GRN/IL1B/C5AR1/CST7/APP/MAPT/CCL3  
/PPT1/ALDH3B1/PRKCD/SGPP2/ELOVL1/CTSA/BAX/B4GALT5/NEU1/GM2A/GLTP/CERS5/PPP2R1A/  
GCL/MLYCD/HMGCS1/ACOT1/ACOT2/ACACB/CBR4/SUCLG2/MCEE/NUDT7/ELOVL2/GSTZ1/AADAT/AC  
GCL/MLYCD/HMGCS1/ACOT1/ACOT2/ACACB/CBR4/SUCLG2/MCEE/NUDT7/ELOVL2/GSTZ1/AADAT/AC  
HEY1/ZNF675/MSX1  
/MTCL1/PAK1/SLC51B/GDI1/UBE2J2/NPEPPS/ITGB1BP1/CDK5/UBE2L3/GSK3A/BAG3/PDCD5/CEM

4A/ENPP1/APOE/LIPG/DGAT2/MLXIPL/ANGPTL3/APOA1/OTC/CPS1

NSMCE2/STX1A/NUP93/NUP205/NUP37/NDC1/NUP188/PIAS3/CBX4/NUP85/NUP43/RAE1/ZMIZ2/N

RSF4/SLC39A10/NCKAP1L/CARD11/TNFSF13B/PELI1/GPR183  
A1/APOA5/CYP7A1  
1/MAVS/IRF5/NMI/DHX9/TLR7/TLR8  
90AB1/CCT4/PNKP/TCP1/PARM1/PTGES3/WRAP53/HSP90AA1/NVL/MAPKAPK5/HNRNPD/MYC/MAPK1  
RF7/NLRC5/PTPN6/FADD/PTPN2/PTPN1/MAVS/IFNAR2/CDC37/YTHDF2/METTL3/ADAR/MUL1/ZBP1  
OLE4/POLA1/PRIM2/RPA2/POLD3/DNA2/RFC5/POLE3/RPA1/POLE2  
LGALS3/TGFB1/CDC25C/PPP1R14D/PPP1R14B/DUSP5/PRKCD/B3GAT3/ADORA1/MTMR2/CDC25A/DN  
1/TTR/CPS1

PTPN2/PTPN1

/HADHB/ECH1/ACBD5/PCCB/LONP2/MLYCD/BDH2/ETFBKMT/MMAA/ALDH3A2/CPT2/FAAH/HIBCH/PP  
A1/ALDH1A1/RARRES2/SRD5A1/BCO2/GPIHBP1/CYP3A7/APOM/DGAT2/AKR1C4/PECR/CYP4V2/RDH  
/DECR2/CRAT/ETFA/DECR1/ACADVL/HADHB/ECH1/ACSM1/LONP2/MLYCD/BDH2/ETFBKMT/ALDH3A2

E2/TGFB1/ARHGAP4/PPT1/PSRC1/CDKN2A/PLXNA3/NDRG3/ADAM15/CDKN2D/BDKRB1/SEMA4A/MAP

11/PRAF2/SLC7A5/SLC1A7/SLC43A2/SLC1A3/SLC25A22/SLC7A8/SLC3A2/SLC7A10/SLC7A6  
NUP205/NUP37/NDC1/POLR2H/NUP188/ZC3H12A/NUP85/NUP43/RAE1/XPO5/POLR2L/NUP155/AGO  
NUP205/NUP37/NDC1/POLR2H/NUP188/ZC3H12A/NUP85/NUP43/RAE1/XPO5/POLR2L/NUP155/AGO

AO

AO

B4X/TWF2/CARMIL1/MAP2/HIP1R/TUBB4A/CAPZA1/MKKS/FHOD3/FKBP4/MYADM/VIL1/PFN1/INPP  
/AKR1C4/CYP2J2/CYP2A13/CYP4F12/EPHX2/CYP1A1/CES2/CYP4F3/CYP2A7/PON3/PON1/CYP1A2  
POE/APOC2/GLTPD2/TMEM30B/SLC25A42/SLC25A25/SCP2/MTTP/APOC1/ABCG8/MFSD2A/APOA2/A  
G/IRS2/REN/SCP2/APOC1/ABCG8/ABCG5/APOA2/ABCB4/PON1/APOA1/CYP4F2/APOA5/APOC3/CYP  
B4/AKR1C4/CYP2J2/CYP2A13/SCP2/CYP4F12/ACSL1/EPHX2/CYP1A1/CES2/CYP4F3/CYP2A7/CYP  
/DECR2/CRAT/ETFA/DECR1/ACADVL/HADHB/ECH1/ACSM1/LONP2/MLYCD/BDH2/ETFBKMT/ALDH3A2  
NCBP2/SNRPF/LSM10/CPSF1/MAZ/CDK7/TTF2/POLR2L/CPSF4/POLR2K/SNRPG/SLBP/SYMPK/CPSF

18/VTCN1/HLA-DPA1/ZP3/HLA-DPB1/CD2/EBI3/CD276/IL27RA/CD3E/TCIRG1/SASH3/ISG15/SI

SK3A/TMEM119/MSX1/NOTCH1/BHLHA15/HDAC5/BMP2/CTDP1/CXCL10/PLPP7/RGS4  
GS2/DUSP9/SRC/TRIB3/GSTP1/CDKN2A/PKN1/DUSP5/PRKCD/HSPB1/MVP/PIF1/NUP62/MAD2L1/C

F3

C18/CPT1A/ELOVL2/ACOX1/ACAA1/ACSL6/HSD17B4/CYP2J2/ACSL5/CYP2A13/SCP2/CYP4F12/AC  
RS1/IRS2/GCK/PPP1R3B/PPP1R1A/KHK/LEPR/IGF2/GYS2/GCGR/G6PC/GNMT  
/IGF1/MLYCD/PPARA/ENPP1/ACACB/IGFBP4/RORA/KAT2B/FOXO1/IRS1/GCKR/IRS2/GCK/DGAT2/  
/HBB/ACAT1/AMBP/CAT/ALDH1L1/HP/CYP4F2/ASPDH  
IDO2/FAH/HAL/HIBCH/THNSL2/GOT1/CBS/ASPA/HNMT/HIBADH/GLUL/GLUD1/GSTZ1/HOGA1/AADA  
DOCK8/PRF1  
/COL5A1/ITGA5/MMP2/ITGB5/COL5A2/COL4A2/LAMB3/HSBP1

3/VPS28/MVB12A/CHMP1A/TMEM50A/VPS25/VCP/VPS37B

ABCA7

POA2/MOGAT2/APOA1/APOA5/SLC2A2

SLPI/ISG15/PIIH/PABPC1/PPIA/ZC3H12A/CCL2/PLSCR1/CD209/LAMTOR5/APOBEC3G/IFI16/BA  
AB31/MFGE8/CD300A/GULP1/F2RL1/NCKAP1L/MSR1/ITGA2/CDC42/FCGR2B/BIN2/THBS1/XKR8/B  
1A/EDNRB/AMN/AVPR1A/GRHPR/ABCG8/ABCG5/AQP9

SLC30A1/MT2A/MT1A/MT1M/MT1G/MT1E/ALAD/ARG1/CYB5A/CAT/HAAO/SORD/MT1X/CYP1A2

A1/ASS1/SERPINF1/ARG1/PCK2/PCK1

CD36/GCH1/NNT/APOE/GSTZ1/HBB/FBLN5/APOM/ABCG2/FABP1/CAT/IYD/HP/RGN/ALB/GSTM1/GS  
D3/DAGLA/ASPM/HMGB2/SIRT6/HIF1A/NUMBL/LEF1/FGFR1/FERMT1/SIX2/KDM1A/WNT7B/ETV6/R

/EBI3/IL27RA/LEF1/BCL3/IL18BP/SLC11A1/IL1B/IL12RB1/IL4R

2/FOXM1/SOX9/EPO/CRYAB/DUSP9/IL2RG/CDK1/ICAM1/LGALS9/MAPK12/SRC/SEMA6A/MAPK13/L  
A/GRN/C5AR1/CST7/APP/MAPT/CCL3

A/GRN/C5AR1/CST7/APP/MAPT/CCL3

B1/IQGAP3/DKK1/RIPK2/PSRC1/GDF15/IRAK1/S1PR2/CD74/PKN1/DUSP5/ROBO1/ADORA1/ADAM9  
CCL5/IQGAP1/P2RY6/SERPINE1/PAK1/PPARD/CORO1B/ITGA2/PDGFA/NDRG4

F2/BAX/CREB3/HYOU1/ATF4/BBC3/PMAIP1/WFS1/PML/ERO1A/DNAJC10/PPP1R15A/GRINA/ERP29  
XNA1/ITGA3/MMD/ETV5/ECT2/DKK1/TNFRSF12A/ARHGEF2/ROBO1/SERPINI1/PLXNA3/NME1/NBL1  
BMF/HIP1R/BID/MT3/YWHAH/BBC3/PMAIP1/ZNF205/GSK3A/YWHAQ/YWHAB/GZMB/STPG1/RHOT2/S

CD1/ASAP1/TLCD1/COL5A1/CXCR4/MICALL1/BAIAP2L1/BIN1/PLEKHM2/MYRF/FLOT1/PLSCR1/EH  
18/HLA-DPA1/ZP3/HLA-DPB1/CD2/EBI3/CD276/IL27RA/CD3E/SASH3/ISG15/SIRPA/ZC3H12A/B  
G2/TGFB2/VDR/PAX8/NOTCH1/ZPR1/XKR8  
SP9/TRIB3/GSTP1/CDKN2A/PKN1/DUSP5/PRKCD/HSPB1/MVP/NUP62/CDKN2D/DTNBP1/CD300A/RG

/ADORA1/PRNP/GRN/DDIT3/BAX/CASP2/UBE2M/NUPR1/DDIT4/ATF4/CDK5/TGFB2/PARP1/TFAP2A  
N/EFNA4/ACP5/SYK/CSF1R/TNFRSF11B/TFRC/CTSK/TCIRG1/SUCO/ATP6AP1/UBASH3B/TNFRSF11  
HLA-A/ISG15/IRF1/IRF3/HSP90AB1/STAT1/IFI35/IRF7/NLRC5/PSMB8/PTPN6/ISG20/HLA-B/F  
HLA-A/ISG15/IRF1/IRF3/HSP90AB1/STAT1/IFI35/IRF7/NLRC5/PSMB8/PTPN6/ISG20/HLA-B/F  
/SYK/NUP62/SNRPD2/RAN/TRIM28/SNRPD1/NUTF2/LMNA/NUP93/NXT1/FAM53B/SNRPE/NUP188/Z

RC/MAD2L2/IL27RA/MSH2/SWAP70/BTK/EXOSC3/HSPD1/NBN/ERCC1/RNF8/XCL1/MSH6/TP53BP1/  
L1/NDC1  
NCF1/CCL5/TGFA/RELN/NCAPG2/GPRC5B/DVL2/LRP8/ADRA2A/ADAM17/PTPN1/PAK2  
LR2G/NUP93/NUP205/NUP37/NDC1/POLR2H/NUP188/ZC3H12A/MEG3/NUP85/NUP43/RAE1/XPO5/S  
83/MFNG/LFNG/FCGR2B/NOTCH2/DOCK10/DOCK11/CD19/POU2F2  
/NUP62/GTSE1/CCT5/RAN/GLIS2/CCT6A/CCT3/TRIM28/NUTF2/CARD10/DKC1/MCRS1/CCT2/LMNA

4/TDG/CTBP2  
/KCNN4/RAB29/PTPRC/NECTIN2/RELA/PRKCB  
/POLR2H/PNKP/LIG1/COPS7B/ISY1/PARP1/CDK7/POLR2L/POLR2K/CETN2/HMG1/RBX1/OGG1/RP  
IF1A/JMJD6/ISG15/STAT1/NCAPG2/NCKAP1L/HCLS1/LYN/LYAR/PTBP3/MB/DNASE2/RPS19/ACVR  
N/GPC1/CHIT1/SLC9A1/FMOD/GNS/GALNS/BGN/LUM/CSPG5/HPSE/CSPG4/SGSH/CEMIP/HEXB/BCA  
/MNDA/CTLA4/LYN/SAMSN1/BTK/FCGR2B/TNFAIP3/INHA/THOC1/INPP5D/CASP3  
CL5/MIF/MAPK3/IRF3/LY86/CCL2/LYN/IL1B/CD6/CARD16/LBP/CCL3/TNFAIP3/BCL10/TLR2  
4/TGFB1/MAGEA1/ROBO1/TSPAN15/ELF3/HNF1B/DTX3/CFD/PERP/CDH6/YBX1/STAT1/PSENEN/DT  
TB/JAK3/MAST2/IRF1/CD47/MAPK11/ARRB2/CMKLR1/CLEC7A/HSPD1/THBS1/IRF5/TLR2/IDO1/C  
HGAP4/AURKA/TNFRSF12A/PLXNA3/DDR1/TWF2/TRPV2/CXCR4/SEMA4A/NDN/MAP2/IQGAP1/PAK1/  
PHF19/DNMT1/MUC1/CHEK1/TRIM28/SIRT6/NAA40/MAPK3/PYGO2/MAP1S/BRCA1/LMNA/NELFE/RP  
CL9/EHD2/ADAM12/MYOF/IL4R  
OLR1/VASP/FZD6/SCRIB/IFT57/CFL1/MTHFD1L/PTK7/STIL/HIF1A/FZD1/ST14/IFT52/PLOD3/S  
O1/GCK/DGAT2/PPARGC1A/MST1/LEPR/FPB1/GNMT

1/HCK/HLA-DRA/IFNGR2/HLA-DQB1/IFI30/HLA-DPA1/HLA-DPB1/GBP2/HLA-DQB2/HLA-A/SOCS1  
HD1/WASF1/EIF4A3/RPS3/KAT2A/APP/CBL/MAPT/STMN2/HSPA5/RAPGEF1

5F6/BMF/NOL3/HIP1R/BID/DYNLT1/YWHAH/BBC3/PMAIP1/ZNF205/GSK3A/YWHAQ/YWHAB/GZMB/S

3B/RAB7B/GDI1/RAB35/RAB24/RAB20/RAB10/RAB4B/RAB3D/RAB5C/SGSM3/RAB3A/RAB11A/DENNA/TAF9  
A/MAP2/THY1/GDI1/MT3/CDK5/SEMA4B/SEMA4D/SEMA4F/SEMA5B/ARHGDIA/SEMA3C/SEMA3E/PTK

SPD1/THBS1  
2/CYP26A1/ALDH1A1/RARRES2/SRD5A1/BCO2/GPIHBP1/CYP3A7/APOM/DGAT2/AKR1C4/PECR/CYP

D1/TRAF3/IKBKG/FADD/CASP8/RPS27A/UBA52/UBE2D2  
L2/APP/FADD/S100A7/ADAM17/RHOA/TNFRSF14/XCL1/TMEM102/CXCL10/DOCK8/CCR2/WNK1  
1/ALDOB  
LIN5  
MME/REN/SERPINF2  
TCD

KDC/XRCC2/KDM1A/PML/PARP1/GPX1/XRCC6/CBL/CHEK2/TMEM109/HSPA5/BCL2L1/TIGAR/POLE3  
/SCRIB/SSNA1/THY1/RELN/ITGB1BP1/CDK5  
CXCR3/CXCL16/CXCL11/XCL2/GPR183/CCL3/S100A7/ADAM17/XCL1/TMEM102/CXCL10/CCR2/WNK  
/REG1A/GAPDH/PI3/S100A8/LYZ/RNASE6/BPIFB2/SLPI/PDZD11/SPON2/PRSS3/CCL13/BCL3/CX  
1/RNASE1/EXOSC4/C11orf80/TSEN54/EME1/RNASE6/HSF1/HMGB2/BAX/SLFN13/CSTF2/APEX2/R  
HAVCR2/GSTP1/HSPB1/ACP5/GBP5/MNDA/SIRPA/F2RL1/SERPINB1/ZC3H12A/HDAC2/IL1B/S100A

/SMAP1/PIK3CB/SYT11/UBQLN2  
L1A1/POSTN/BAK1/SRC/MMP14/SERPINE2/ATP1A1/TGFB1/COL3A1/ANKRD1/PSPH/CHEK1/BDKRB1

/S100A7/CXCL17/LGMN/CXCL10/MOSPD2/CCR2  
FBP3/CCL5/IQGAP1/P2RY6/SERPINE1/PAK1/PPARD/CORO1B/ITGA2/PDGFA/NDRG4  
1/RCC2/LGALS1/CDKN2A/ADAM15/FZD7/EFNA5/SERPINE1/CORO1C/JAG1/ITGB1BP1/SPOCK1/TAC  
FAM1/PTPN6/CD27/BTK/BAD/INHA/INPP5D/IKZF3  
/LIG1/RPS3/POLQ/MUTYH/OGG1/RPA2/DNA2/TDG/RPA1/SMUG1/HMGA2/HUWE1/UNG/PRMT6/LIG3/  
/LBH/EVI2B/TGFB2/RAB10/NAP1L2/FGFR2/GNL3/SFRP2/AKNA/CDK2AP2/NOTCH1/TEAD3

/BAK1/SRC/MAPK13/ECT2/STK26/ADA/PRKCD/ADAM9/EZH2/TRPM2/HSF1/AREG/HMOX1/PCNA/ZNF  
L4/XCL2/APP/FADD/CCL3/S100A7/ADAM17/RHOA/TNFRSF14/XCL1/TMEM102/CXCL10/DOCK8  
1/TCIRG1/ATP6V1H/RAB20/ATP6V1E1/ATP6VOC/ATP6VOE1/ATP6VOD1  
/SMARCB1/PADI2/SMARCC1

BMF/HIP1R/BID/YWHAH/BBC3/PMAIP1/ZNF205/GSK3A/YWHAQ/YWHAB/GZMB/STPG1/RHOT2/SLC25  
205/NUP37/NDC1/NUP188/DYNLT1/KPNB1/CD209/NUP85/NUP43/VPS28/RAE1/MVB12A/NUP155/N

NME4  
NM2/SH3GLB1/PACSIN2/PACSIN1/FNBP1L  
MBIM1/BCL2L1/CLTC/MRAP2

CT2/STK26/SPI1/CYBB/PRKCD/EZH2/TRPM2/HSF1/SLC9A1/EFNA5/PCNA/ZNF580/SIRPA/DDX11/



MEPA1/EIF4EBP1/ARHGEF2/PRKCD/MAPRE1/TMSB4X/TWF2/CARMIL1/MAP2/LCMT1/ANKRD27/HIP1  
HLA-A/ISG15/IRF1/IRF3/HSP90AB1/STAT1/IFI35/IRF7/NLRC5/PSMB8/PTPN6/ISG20/HLA-B/F  
205/NUP37/NDC1/NUP188/DYNLT1/KPNB1/CD209/NUP85/NUP43/VPS28/RAE1/MVB12A/NUP155/N

PB1/IGF2BP1/SYK/IL18/IGF2BP3/CARD9/LTB/HMOX1/CD86/MAPKAPK2/EBI3/CD276/CD3E/MAST  
C31A1/ABCC2/SLC25A13/SLC19A2/SLC22A3/SLC1A1/SLC25A30/SLC13A3/SLC7A2/SLC47A1/SLC  
N5/SCP2/APOB/ABCB4/PON1/APOA1/CYP4F2/CYP4A11  
26/RIPK2/GDF15/IRAK1/S1PR2/CD74/PKN1/DUSP5/PRKCD/ADORA1/PRNP/ADAM9/SYK/STK39/IL  
RHOG/CARMIL1/CORO1C/CORO1B/SNX10/RAC1/PFN1/TACSTD2/ARFIP2/DBNL/INPPL1/LIMA1/DEF

KN1C/SOCS3/FGFR2/GRB2/DNAJB6  
M5/AS3MT/HNF4A/CYP2C18/ACY1/AKR7L/POR/RORA/CYP26A1/ACY3/CES1/ACAA1/BPHL/CYP3A7/

FB/C3/CFH/VTN/CD5L/CFHR1/C4BPB/CFHR2/CLEC3B/C7/C8B/F2/SERPINF2/CPN2/CPB2/C8A/KL  
3/NIPAL2/NIPA1/NIPA2  
/FLNA/RACGAP1/SHCBP1/ARHGEF2/SMARCD3/IGF2BP1/NAP1L1/DAGLA/FZD6/ASPM/HIF1A/ADGRG  
/BCL2L12/DYRK2/DDIT4/BCL3/KDM1A/TAF9/IFI16/PML/MSH2

M1L/RPL23/RPS7/BAG2/RPL5/MASTL

HAVCR2/GSTP1/HSPB1/ACP5/MNDA/SIRPA/SERPINB1/ZC3H12A/HDAC2/IFI16/CASP1/PML/IL1R2  
1R/BID/YWHAH/BBC3/PMAIP1/ZNF205/GSK3A/YWHAQ/YWHAB/GZMB/STPG1/RHOT2/SLC25A5/BAD/  
MN1/PLXNA1/SRC/SEMA6A/RAC2/PDLIM7/ENAH/ARHGAP4/EFNA3/TNFRSF12A/AGRN/ROBO1/PLXNA  
C/LGALS9/BAK1/MAPK12/SRC/DAB2/MMP14/MELTF/TRIB3/FBLN1/AURKA/RIPK2/EFNA3/ROBO1/A  
/TGFB2/PLXND1/FGFR2/TGFB3/SEMA3C/TWSG1  
1/CORO1A/CIB2/P2RX4/ITGAV/PRNP/PLCB1/CD52/TRPM2/GNA15/DDIT3/TPCN1/BDKRB1/BAX/CX  
AD2L2/IL27RA/MSH2/SWAP70/XRCC4/EXOSC3/HSPD1/NBN/ERCC1/RNF8/MSH6/TP53BP1/ATAD5/T  
GR2B/CD177  
S14/HIF1A/ASIC1/RELN/RIN1/CLN3/CDK5/DEAF1/B4GALT2/NDRG4/PPP1R1B/EIF4A3/APP/RIC8  
/CD2/SERPINE1/ZNF580/CD58/F2RL1/BCL3/IL1B/ANXA4/PRKD2/TLR5/FADD/CLEC7A/LBP/CD33

IN1/CYP51A1/SOD1/LDLR/AGTR1/HMGCS1/ACACB/APOE/POR/RORA/PROX1/SC5D/DGAT2/PPARGC1  
13/TGFB2/PTPN6/PIEZO1/SFRP2  
SFRP4/ALOX15B/CYP27B1  
3R1/CDC42/PRKCI/SYNE4/RHOA  
PDA1/GPC4/GPC3/CD44/AGRN/SDC3/PRKCD/VCAN/ABCD1/UPP1/GPC1/APOBEC3B/TYMP/NPL/GPD1  
E/DRD1/ADRB2/KNG1/CPS1  
CCDC22/PSMD10/YWHAB/FAF1/DZIP1/GET4/PKD1/NFKBIL1  
1L/RAC1/C5AR1/LBP/S100A7  
N/GPC1/SLC9A1/FMOD/GNS/GALNS/BGN/LUM/CSPG5/HPSE/CSPG4/SGSH/CEMIP/HEXB/BCAN/ACAN

R4/IL34/BIN1/HDAC1/HDAC2  
/TRIM28/PRKDC/MAD2L2/SPRED1/BRCA1/PCNA/DDX11/PMAIP1/WAS/PARP1/RPS3/CBX8/FUS/BAB

D1/TRAF3/IKBK/ADD/CASP8/RPS27A/UBA52/UBE2D2  
CORO1A/FOLR1/STX3/SQSTM1/SNAP25/CPLX2/TAP1/ZNF385A/RAB34/S100A10/DTNBP1/AREG/CH

/FAAH/PNPLA3/ABHD6/LPIN2/APOE/CPT1A/APOC2/LIPG/SORL1/DGAT2/C3/PLIN5/LIPC/AGMO/G  
/HSD17B2/CYP26A1/ALDH1A1/SULT1E1/SRD5A1/BCO2/HSD17B4/CYP3A7/HSD17B8/DHRS2/DGAT2  
R8D1/OR10J3/OR1F2P/OR51B5/OR2H2/OR51Q1/OR3A3/OR2B2/OR4K1/OR2W3/OR3A2/OR12D2/OR5  
/MGST1/PRDX3/MGST2/HBA2/SOD1/ABCC2/CD36/GCH1/NNT/APOE/SLC30A1/GSTZ1/ACAA1/HBB/M  
FB/C3/CFH/VTN/CD5L/CFHR1/C4BPB/CFHR2/CLEC3B/C7/C8B/F2/SERPINF2/TFR2/CPN2/CPB2/C  
/SPI1/C1QC/CD74/NME1/NME2/CSF3R/HMGB3/PRMT1/HMGB2/IL34/HIF1A/ATP6AP1/ISG15/UBAS

3EAP/SMARCA4/DDX11/POLR2H/NCBP2/SNAPC2/NPM3/TAF9/SIRT7/INTS1/SMARCB1/CDK7/SRRT/  
EX11A/ADRB2/PPARGC1A/ALDH6A1/FABP4/FNDC5  
K/PPP1R3B/KHK/IGF2/GCGR  
D6/DKC1/TRMU/FTSJ1/METTL1/FBL/NOP2/NHP2/PUS1/URM1/EMG1/TRMT1/SSB/TRMT61A/APOBEC  
6B/MAP2/MSN/MAPK3/MAP2K2/AP4M1/ANKRD27/STX6/CORO7/RAB7B/SORT1/STX10/TBC1D10B/SN  
NJ11/P2RX4/CSF1R/NOL3/HYOU1

ASP1/STAT1/SIX2/JAG1  
F1/IL15/RASAL3/TWSG1/DOCK2/TNFRSF14/XCL1/PTPRC/SH3RF1/CCR2/HLA-E/ARG2/ZBTB7B/CD  
PB1/IGF2BP1/SYK/IL18/IGF2BP3/CARD9/LTB/HMOX1/CD86/MAPKAPK2/EBI3/CD276/CD3E/MAST  
3/MAFG/KRT80/ADAM9/USH1C/CD109/EZH2/NME2/PKP3/KRT7/ESRP1/SCRIB/AKR1C3/CTSK/ST14

P1/CTSK/PPARD/FERMT1/SULT2B1/CBFB/TGFB2/VDR/MAFF/GAL/HPSE/OVOL2/KDF1/TRADD/KRT1  
NUP205/NUP37/NDC1/POLR2H/NUP188/ZC3H12A/NUP85/NUP43/RAE1/POLR2L/NUP155/AGO2/NUP

12A8/KCTD7/SLC12A7  
S9/SVBP/OTUB1/FBXO5/GTPBP4/PRR7/U2AF2/PIAS3/CDK5/VPS28/RPS3/ARRB2/RPL23/UBXN1/A

LDH1L1/CYP4F2/ASPDH

4

1/SERPINE1/SULT2B1/VDR/PAX8/OVOL2/KDF1/BAD/NOTCH1/SFRP4/MESP1/ALOX15B/VEZF1  
PON1/APOA1  
PON1/APOA1

2/MRPS34/MRPL13/UQCC2/GADD45GIP1/MRPL10/MRPL52/MRPL48/DAP3/MRPS7/MRPL53/MPV17L2  
XA13/PKDCC/MICALL1/ANKRD27/KRT18/ARF3/CCDC22/RAB10/SNX27/ARF4/ACSL3/LLGL1/CCDC9  
APN2  
P6V0B/ATP6VOD2/ATP6V1C1/SLC9A1/TMEM165/MAPK3/TCIRG1/SLC4A2/ATP6AP1/ATP6V1H/CLN3

1/MAVS/IRF5/NMI/DHX9/TLR7/TLR8  
D1L/HSP90AB1/LEPROTL1/RANGRF/STX4/KCNAB2/MAP1A/CD247/EGF/TM9SF4/ABCA7  
D74/NME1/NME2/IL34/ATP6AP1/UBASH3B/FSTL3/TFE3/LEF1/IRF7/EVI2B/HCLS1/MITF/LYN/PI

3/MAST2/IRF1/CD47/MAPK11/ARRB2/CMKLR1/CLEC7A/HSPD1/THBS1/IRF5/TLR2/IDO1/CCL19/T  
YK/CSF1R/HMOX1/MIF/HIF1A/IL1B/IL4R/APP/CLEC7A/LBP/ADAM17/MAVS/TLR2/ALOX15B/TWIS  
ITGA5  
RHOG/TBC1D16/RANGAP1/CORO1C/TBC1D1/TBC1D10B/CXCL13/TBC1D30/TBC1D13/ABR/SYDE1/RU  
ISG15/TRIM59/ZC3H12A/TRIM31/PLSCR1/APOBEC3G/CHMP3/IFI16/BANF1/PML/ILF3/ISG20/AP

AB34/CHMP4B/TMEM165/NUPR1/RAB7B/MT3/ATG101/PIP4K2A/CLN3/RAB20/GBA/LAMTOR1/CLN6/

LR2G/NUP93/NUP205/NUP37/NDC1/POLR2H/NUP188/ZC3H12A/MEG3/NUP85/NUP43/RAE1/XPO5/S  
OAZ1/ODC1/PSMB2/PSME3/OAZ3/PSMB4/PSMB8/PSMB10/PSMA5/PSMD13/PSMC4/PSMD10/PSMD11/  
LAMF7/TUBB4B/VAV1/PRDX1/LAG3/ULBP2/PTPN6/ARRB2/GZMB  
1R/BID/YWHAH/BBC3/PMAIP1/ZNF205/GSK3A/YWHAQ/YWHAB/GZMB/STPG1/RHOT2/SLC25A5/BAD/  
IF1A/MAP1S/DYNC1H1/BLOC1S4/CLN3/AP3M2/WASF1/CDC42/ACTL8/AP3D1/COPG1/NDE1/MAPT/B  
/THRSP

R/CCR5/TRPM4/GPR183

ED1/KDM1A/PMAIP1/KMT5A/PSMD10/MSX1/PTTG1IP

D8/IGF1R/FCGR2B/VPS35

PRNP/PLCB1/TRPM2/MCUB/DDIT3/TPCN1/BDKRB1/BAX/FKBP1A/P2RY6/THY1/UBASH3B/NOL3/PLC

/FAAH/PNPLA3/ABHD6/LPIN2/APOE/CPT1A/APOC2/LIPG/SORL1/DGAT2/C3/PLIN5/LIPC/AGMO/G  
GK1/OXT/ABCC2/SLC1A1/APBA1/AVPR1A/KMO/PLA2G12B/GLS2/ABCB11/SLC51A/SLC1A2/ABAT/A  
P131/PRKCD/B3GAT3/PRNP/HRAS/GTSE1/RAN/MICALL2/SAE1/TRIM28/NUTF2/MTCL1/OAZ1/PAK1  
SASH3/SPON2/F2RL1/GPRC5B/IL1B/HK1/BCL10/MAVS/HLA-F/TNFRSF14/XCL1/MAP3K7/FFAR2/H  
HD1/WASF1/EIF4A3/RPS3/KAT2A/APP/CBL/MAPT/STMN2/HSPA5/RAPGEF1

GSTP1/HSPB1/ACP5/MNDA/SIRPA/SERPINB1/ZC3H12A/IFI16/CASP1/PML/GSDMD/ARRB2/APP/HK  
NKP/DCLRE1B/NBN/ERCC1/MAPKAPK5/DCLRE1C/TFIP11/HNRNPD/MAPK15/TERF1  
/ZNF703/LEF1/HDAC2/JAG1/IL1B/LOXL2/TGFB2/TGFB3/ACVR1/NOTCH1/BCL9L/TWIST1/PDPN  
/MSN/TALDO1/LCP1/SIRPA/PPIA/CAPZA1/CD47/TCP1/IL12RB1/RALA/CNN2/CDC42/RPLP0  
12A2

OL1A1/BAK1/TSP0/MAPK13/PBK/ATP1A1/AKR1B1/ECT2/TGFB1/RAD51/PTAFR/ARHGEF2/RELB/PO  
OL1A1/BAK1/TSP0/MAPK13/PBK/ATP1A1/AKR1B1/ECT2/TGFB1/RAD51/PTAFR/ARHGEF2/RELB/PO

/CCL28/ABR/FADD/PTGER4

CI/RIPK2/BIRC3/FKBP1A/BRCA1/RPS2/HSPBP1/AXIN1/KDM1A/BIRC7/WFS1/UBE2L3/GSK3A/UBE  
B/SNRPG/SLBP/CPSF3/EXOSC10/LSM1/SNRPD3/ZNF473/DCP2

GK/GNPDA2/UGDH/NANS/GMDS/AMDHD2/GFPT1/GMPBP/PMM2

NG

12A/KPNB1/CD209/CPSF4/TNIP1/BAD/CASP8/BCL2L1/KPNA6/ATG7/SERPINB9/CCL8/PABPN1/VA  
D6/TLE3/PSMB9/DDIT3/PSMD14/MAD2L2/PSMD2/FZD1/IGFBP6/MLLT3/HDAC1/LZTS2/PSMB2/SFR  
AFR/SYK/UNC13D/HMOX1/CD300A/STXBP2/F2RL1/LYN/FGR/ABR/IL4R/BTK/STX4/FCGR2B/VAMP8

ALS14/NFKBID/TP53/WNT5A/CD274

C3H12A/PLSCR1/APOBEC3G/IFI16/BANF1/ILF3/ISG20/APOBEC3D/TNIP1/SRPK1/MAVS/OAS3/IF

MIF/ZC3H12A/TNIP2/CST7/IL4R/LBP/CCL3/HSPD1/FCGR2B/THBS1

G1/NCKAP1L/PMAIP1/IL2RA/SIT1/FADD  
LD1/APOC3

RSF9/SNRPC/SRSF12/ISY1/PRPF6/SF3A3/SNRPG/PRPF19/SRPK1/DDX23/RBMX/ZRSR2/USP39/LU  
3/HIP1R/BID/YWHAH/BBC3/PMAIP1/ZNF205/GSK3A/YWHAQ/YWHAB/GZMB/STPG1/RHOT2/SLC25A5  
RAF2/RBCK1/PSMD14/FBXL19/TRIM6/PSMD2/RNF34/UBE2Q2/RNF19B/SHARPIN/BRCA1/PSMB2/PS  
APK13/PBK/AKR1B1/STK26/DKK1/RIPK2/GSTP1/IRAK1/PKN1/HRAS/SYK/PLCB1/STK39/MAPK8IP  
2/ARL2/FLNC/RCC2/FLNA/VASP/HDAC7/CD151/PKP3/COL16A1/LAMC1/CTNND2/MICAL2/S100A1

ERMT3/PRKCD/HSPB1/SLC7A11/PLEK/SYK/COMP/CCL5/RAP2B/UBASH3B/C1QTNF1/ZNF703/BLOC1  
CYP26B1/MAMSTR/IL4R  
/MARK2/SLC9A3R1/ARF4/CDC42/PRKCI/WDR1/SYNE4/PARD3/RHOA

OLR2H/ATF4/SMARCB1/CDK7/NCL/POLR2L/POLR2K/HEATR1/TAF1D/UBTF/PIH1D1/BAZ2A/WDR75/  
HK2/TFRC/SYNGR1/CACYBP/BSPRY/GFPT2/SNX10/KDM5B/SPOCK2/PML/SOCS3/ADAM23/PADI2/NC  
HK2/TFRC/SYNGR1/CACYBP/BSPRY/GFPT2/SNX10/KDM5B/SPOCK2/PML/SOCS3/ADAM23/PADI2/NC  
L34/ATP6AP1/LEF1/EVI2B/HCLS1/CCR1

1R/BID/YWHAH/BBC3/PMAIP1/ZNF205/GSK3A/YWHAQ/YWHAB/GZMB/RHOT2/SLC25A5/BAD/CASP8/  
/CD2/SERPINE1/ZNF580/CD58/F2RL1/BCL3/IL1B/ANXA4/PRKD2/TLR5/FADD/CLEC7A/LBP/CD33  
PDL3B/ASAHI/GBA/SMPD4

B

B

F1/MAZ/TTF2/CPSF4/SNRPG/SLBP/SYMPK/CPSF3/SSU72/PABPN1/FIP1L1/CSTF3/SNRPD3/ZNF47  
K11/CLEC7A/HSPD1/IRF5/TLR2/IDO1/CCL19

P2RX4/GRN/RANGAP1/BAX/RTN4RL2/GIPR/LYN/TNC/NREP

1/MAPK13/PBK/ECT2/TGFB1/RAD51/UNC119/DTL/RAD54L/FEN1/FANCD2/SLC7A11/POLD1/HRAS/  
SPB8/PYCARD/E2F1/SOX9/ANXA2/CTSC/SLC2A6/TIMP1/TSP0/ATP13A2/DAB2/PBK/SERPINE2/TR  
/F8/SERPINA1/ACTN2/SOD1/PROS1/CD36/VWF/SERPING1/ORM1/RARRES2/ORM2/FGB/F5/FGG/CL  
L1/HAMP/PPARGC1A/CYP39A1/FABP1/ABCG8/ABCG5/APOA2/PBLD/RBP4/MOGAT2/AKR1D1/APOA1/  
/HADHB/ECH1/ACBD5/PCCB/LONP2/MLYCD/XLB/BDH2/ETFBKMT/FAH/MMAA/ALDH3A2/CPT2/FAAH  
P1/AP2M1/CSK/TMBIM1/BCL2L1/CLTC/MRAP2

6A/LEF1/HCFC1/SMARCB1/RUVBL2/USP22/JADE2/KAT2A/BEND3/HAT1/WDR5/PIH1D1/MORF4L2/A  
TRIM28/LCMT1/PYG02/BRCA1/FTSJ1/RAB3B/METTL1/LMNA/PRMT2/NELFE/FBL/NOP2/KDM1A/EMG  
A3/ABAT/SLC6A1

N/LGALS9/SRC/GAPDH/RIPK2/HAVCR2/SCAMP5/SYK/TMSB4X/CSF1R/EZR/VTCN1/TRIM6/MIF/CD2  
GSTP1/HSPB1/ACP5/GBP5/MNDA/SIRPA/F2RL1/SERPINB1/ZC3H12A/IL1B/IFI16/CASP1/PML/GS

1/NECTIN1/CSF3R/BSG/TNFRSF11B/BAX/TUFT1/SERPINE1/TCIRG1/PERP/LAMA5/EDA/HDAC1/LE  
K1D/IFT80/ABL1/SFRP2/SFRP4/RNF213

LR2G/NUP93/NUP205/NUP37/NDC1/POLR2H/NUP188/ZC3H12A/MEG3/NUP85/NUP43/RAE1/XPO5/S  
PO/SEMA6A/MELTF/FBLN1/TGFB1/RCC2/ARHGAP4/LGALS1/DKK1/ARHGEF2/PLXNA3/HES4/ASAP1/  
TCD

14/PSMB4/PSMB8/PSMB10/PSMA5/PSMD13/PSMC4/PSMD10/PSMD11/PSMD1/PSMA7/FBXL6/PSMB3/

/UBE2F/NEDD8/RPL11

AOA/ALDH1B1/CYP2C18/MTHFS/NNT/POR/MAOB/SULT1E1/GSTZ1/AADAT/HBB/CPN1/QDPR/ACAT1/  
HX34/YBX1/PABPC1/SLC11A1/HNRNPU/DHX9/RBM10/RBM24/LARP1/HNRNPA0/HNRNPD/HNRNPC/SY

/PFKFB1/HP/FBP1

1A1/CYP1A2/HPX

TYRO3/SRC/LGALS1/CD74/ITGAV/NECTIN1/TFRC/CD86/CXCR4/ITGA5/SELPLG/HAVCR1/TRIM11/

TYRO3/SRC/LGALS1/CD74/ITGAV/NECTIN1/TFRC/CD86/CXCR4/ITGA5/SELPLG/HAVCR1/TRIM11/  
TYRO3/SRC/LGALS1/CD74/ITGAV/NECTIN1/TFRC/CD86/CXCR4/ITGA5/SELPLG/HAVCR1/TRIM11/  
TYRO3/SRC/LGALS1/CD74/ITGAV/NECTIN1/TFRC/CD86/CXCR4/ITGA5/SELPLG/HAVCR1/TRIM11/

HX34/DKC1/YBX1/PABPC1/SLC11A1/HNRNPU/DHX9/RBM10/RBM24/LARP1/HNRNPA0/LRPPRC/HNRN

H/RPA2/POLD3/ABL1/TDG/HDAC10/ERCC1/RPA1/MSH6  
F1/TCIRG1/MNDA/CXCL9/C5AR1/CCR5/CLEC5A/LBP/CD300C/GNLY/BCL10/VEZF1/ADORA2B/BECN  
LA/BTK/IGF1R/ABL1/PTK2/TNK2/VEGFA

DR/TRIM25/PHEx/CYP27B1/CXCL10/ATP2B1/BGLAP/CD4  
FD1/PIPOX/FTCD  
PINF1/ARG1/PCK2/CPS1/PCK1  
ID/YWHAH/BBC3/PMAIP1/ZNF205/GSK3A/YWHAQ/YWHAB/GZMB/SLC25A5/BAD/CASP8/YWHAQ/TFDP  
ENO1/SLC2A6/DTYMK/TGFB1/GAPDH/TYMS/UCK2/HK2/PFKFB4/NME1/NUP62/PFKFB3/TMSB4X/NME

MAPK3/FGFR4/SPRED1/POLR2G/POLR2H/FGFR1/NCBP2/FGFR3/FIBP/FGFR2/PRKD2/GRB2/POLR2L  
RORC/GPLD1/CYP7A1

H2/SOCS3/FGFR2/GRB2/DNAJB6/HEY1/OVOL2/VASH1/CASP8/RBPJ/ADM  
12/DDIAS/BID/KDM1A/TAF9/SFRP2/BCL2L1/CCAR2/ATAD5/TRIM32/ING2/TMEM161A/ACKR3  
CARD/E2F1/ANXA2/CTSC/SLC2A6/TIMP1/TSP0/ATP13A2/DAB2/PBK/TRIB3/AURKA/GAPDH/RIPK2  
GCL/IDO2/FAH/HAL/HIBCH/THNSL2/PCYOX1/GOT1/CBS/ASPA/HNMT/HIBADH/BCKDHB/GLUL/GLUD

/ACSM1/LDLR/GOT1/PNPLA3/HNF4A/APOE/RORA/APOC2/LIPG/GCKR/ACOX1/IRS2/GPIHBP1/APOM  
35D1/CPT1A/SLC1A1/SLC25A30/SLC23A2/SLC13A3/IRS2/SLC7A2/SLC25A15/SLC38A3/SLC16A1  
35D1/CPT1A/SLC1A1/SLC25A30/SLC23A2/SLC13A3/IRS2/SLC7A2/SLC25A15/SLC38A3/SLC16A1  
NA3/TWF2/TRPV2/SEMA4A/MAP2/PAK1/NRCAM/GDI1/MT3/CDK5/CTTN/SEMA4B/SEMA4D/SEMA4F/S

RSK1/STIL/NPM1/CHMP4C/BRCA1/XRCC3/CDK2/CHORDC1/POC1A/CHMP3/PLK4/KAT2A/CHMP1A/CE  
RFWD3/DNA2/EME2/SMARCA1/THOC1/MMS22L  
2/TUBB4A/CAMSAP2/FKBP4/INPP5J/KATNB1/CLIP3/CKAP2/TBCD/STMN2/EML2/CAMSAP1/CIB1  
NT1/GAL3ST1/PPT1/ALDH3B1/PRKCD/PIGU/SGPP2/GAL3ST4/ELOVL1/DPM2/CTSA/PIGS/BAX/GPA  
RPL35/LAS1L/RPL7A/RPF2/RSL1D1/NOL9/WDR12/RPL10A/ZNHIT3/ZNHIT6  
P/GRINA  
2/UNC119/CLCF1/CD44/CD74/ARHGEF2/ADORA1/PRNP/SYK/IL18/DLG3/CSF1R/HSF1/NCF1/TNFR

/FOXK1/HK3/TPI1/FOXK2/GPI/PFKM/ALDOC/HK1  
/FOXK1/HK3/TPI1/FOXK2/GPI/PFKM/ALDOC/HK1  
/FOXK1/HK3/TPI1/FOXK2/GPI/PFKM/ALDOC/HK1

PB1/IGF2BP1/SYK/IGF2BP3/CARD9/LTB/HMOX1/CD86/MAPKAPK2/EBI3/CD276/CD3E/MAST2/IRF  
/CLIC3/SLC26A6/SLC12A2/CLCN2/SLC12A9/SLC1A4/SLC37A1/SLC12A8/SLC1A3/GABRA3/CLCN7

9A10/HSP90AB1/GBA/CDCA2/NSMF/PTPA/PPP1R15A/ANKLE2/SYMPK/CALM2/PTBP1/CD33/SPPL3/PAK1/TNFRSF11A/DVL3/WNT7B/BIRC7/MLKL/TNIN/DVL2/RPS3/MAP3K6/ZNF675/SFRP2/DBNL/PTVCR2/BATF/RELB/IL18/HLA-DMB/JAK3/CD86/APBB1IP/SEMA4A/LCP1/F2RL1/LEF1/ZC3H12A/BC

P1A1/UCP2/ATP6V1F/TMSB4X/ATP6V0B/ATP6V0D2/ATP6V1C1/SLC9A1/TCIRG1/ATP6AP1/CYC1/TB/ECT2/ARL2/TGFB1/FLNC/RCC2/FLNA/VASP/CSF1R/HDAC7/NECTIN1/CD151/PPK3/COL16A1/LA

/RAC1/PLXND1/SEMA4B/SEMA4D/SEMA4F/SEMA5B/ARHGDIA/SEMA3C/SEMA3E/PLXNC1Y1/SLC35C1/LFNG/CBFA2T2/RITA1/NOTCH3/ARRDC1/EGF/YTHDF2/CHAC1/METTTL3/EGFL7/NEURL

RD5A1/ASS1/QDPR/ACAT1/HAMP/HPN/VTN/ARG1/CYP1A1/BAAT/PCK2/CPB2/RGN/OTC/CPS1/PCK1/CYP19A1/VCAM1/THBS1/IDO1/ADORA2B  
X2/RAN/RANGAP1/TRIM28/NUTF2/ZC3H12A/NCBP2/FERMT1/HCLS1/AKAP8L/IL1B/CDK5/TXN/PPP

SOX4/SOX9/TEAD2/DBN1/ASF1B/COL1A1/CHST11/NEK2/GINS1/SULF1/TM4SF1/SPINT2/MMP14/LRC/ITGA3/ARHGEF16/RAC2/CSF1/DEPDC1B/ECT2/RHOV/ARHGAP4/SQSTM1/RACGAP1/ARHGEF2/CY/FOXK1/HK3/TPI1/FOXK2/GPI/PFKM/ALDOC/HK1  
/FOXK1/HK3/TPI1/FOXK2/GPI/PFKM/ALDOC/HK1

5

PK2/MAPRE1/RAN/HSF1/TRAF2/FKBP1A/HSP90AB1/HIP1R/FLOT1/CDK5/PLXND1/APP/RALB/STPG14/LIF/P3H4/TGFB1/GPNMB/NCDN/EFNA4/ACP5/SYK/ELF3/IL18/CSF1R/TNFRSF11B/TFRC/CTSKD1/BAX/BASP1/FGFR1/JAG1/TGFB2/FGFR2/VDR/PAX8/HOXB7/SEMA3C/TFAP2A/WNT4/ACVR1/TNFPPP1R3B/PCK2/FBP1/IGF2/GYS2/PCK1

FCGR2B/NOTCH2/DOCK10

1/FADD/PELI1/TNFAIP3/CASP8

C1/ESRP1/CREB3L1/CCL5/IQGAP1/MAPK3/FGFR4/SPRED1/POLR2G/POLR2H/FGFR1/NCBP2/FGFR3/EZH2/TCOF1/ADAM15/GLIPR2/TRIM28/FAM83D/MAD2L2/HIF1A/MCRIP1/ZNF703/LEF1/HEYL/HD  
C25A/CDKN2D/CHEK1/RHN01/BAX/BRSK1/NPM1/PCNA/BMF/COPS9/E2F4/BCL3/NOC2L/ATF4/KDM1

/IGF1/MLYCD/PPARA/ENPP1/ACACB/IGFBP4/GPER1/RORA/KAT2B/FOXO1/IRS1/GCKR/IRS2/GCK/VL6/MCCC2/ACOT13/SULT1A2/ACSM1/SLC26A1/ACSF2/HMGCL/MLYCD/HMGCS1/ABHD14B/PAPSS2/VL6/MCCC2/ACOT13/SULT1A2/ACSM1/SLC26A1/ACSF2/HMGCL/MLYCD/HMGCS1/ABHD14B/PAPSS2/VL6/MCCC2/ACOT13/SULT1A2/ACSM1/SLC26A1/ACSF2/HMGCL/MLYCD/HMGCS1/ABHD14B/PAPSS2/2B/ITGA1/GCLC/SOD1/AGTR1/ADRA1B/ADRA1A/GCH1/EDNRB/APOE/DRD1/GPER1/ACE2/AVPR1A/H1A/LDLR/PPARA/APOE/PEMT/APOLD1/GLUL/LIPG/APOM/DGAT2/MTTP/APOB/APOC1/APOA2/NOTUM  
EK/PER1/SRD5A1/ASS1/PDE2A/DUSP1/FOSB/REN/ITPR2/GPD1/CRHBP/PKLR/PFKFB1/CD01/AGXT2B/ITGA1/GCLC/SOD1/AGTR1/ADRA1B/ADRA1A/GCH1/EDNRB/APOE/DRD1/GPER1/ACE2/AVPR1A/H  
P/RREB1/KANK1/PHLDB2/APCS/PROS1/CD36/APOE/SERPING1/MYLK/PLPP3/VTN/FGF/FGG/PROC/2B/ITGA1/GCLC/SOD1/AGTR1/ADRA1B/ADRA1A/GCH1/EDNRB/APOE/DRD1/GPER1/ACE2/AVPR1A/H  
E/FITM1/APOC2/LIPG/IRS2/APOC4/C3/PLIN5/REN/SCP2/APOB/APOC1/ABCG8/ABCG5/APOA2/AB  
A/ATAD2/SET/SMARCB1/MTF2/PIH1D1/UBR5/TWIST1/MLLT6/DNMT3B/CTBP1/UCN/PHF1/BCOR/PR  
IGU/GAL3ST4/DPM2/CTSA/PIGS/BAX/GPAA1/B4GALT5/NEU1/GM2A/GLTP/B3GNT5/GBGT1/SMPD2/  
GB1BP1/MTA2

ENO1/SLC2A6/TGFB1/GAPDH/HK2/PFKFB4/NME1/NUP62/PFKFB3/TMSB4X/NME2/PGK1/SIRT6/NUP  
N

CCNB1/CCNB2/CYBA/LIMK1/RGS2/TKT/CRYAB/ENO1/DBN1/CDK1/REG1A/SEMA6A/MMP14/CLSTN1/  
ER3/EPO/ENO1/DUSP9/STMN1/SH3BP1/SRC/ITGA3/SEMA6A/PLAUR/LIF/PBK/SERPINE2/TRIB3/F  
7A/LBP/THBS1

EN54/SLFN13/RNASET2/RRS1/ZC3H12A/POP7/RPS21/POP1/EDC3/DROSHA/AGO2/PIWIL4/KRI1/C

P/OTUB1/FBXO5/GTPBP4/PRR7/U2AF2/CDK5/VPS28/RPS3/ARRB2/RPL23/UBXN1/ABL1/TNFAIP3/

4C/BRCA1/XRCC3/CHORDC1/POC1A/CHMP3/PLK4/KAT2A/CHMP1A/FBXW5/TRIM37/CENPJ/RBM14

2/ITGAV/LAMB1/FZD7/HNF1B/COL5A1/ITGA5/MMP2/ITGB5/LEF1/FGFR1/COL5A2/SIX2/ITGA2/F  
KLHDC8B/CHMP1A/KIF20B/MITD1/RHOA/ARF1/VPS4A/CHMP6/CNTROB/CHMP4A/BIN3/CHMP2B/CHM

/BTN2A2/PTPN2

3

2/CYP26A1/ALDH1A1/RARRES2/SRD5A1/BCO2/GPIHBP1/CYP3A7/APOM/DGAT2/AKR1C4/PECR/PHY  
P4F11/BTD/MMAA/CYP11A1/SLC19A2/ENPP1/MTHFS/AMN/CLYBL/PC/CYP26A1/SLC23A2/KMO/GC/  
/IGFBP2/DUSP1/SSTR1/SOCS2/PPARGC1A/CRHBP/CAT/APOB/F7/SLC6A1/CYP1A2

2B/ITGA1/GCLC/SOD1/AGTR1/ADRA1B/ADRA1A/GCH1/EDNRB/APOE/DRD1/GPER1/ACE2/AVPR1A/H  
OA1/APOA5

/MT1A/MT1M/MT1G/MT1E/CYP1A1/SORD/MT1X/CYP1A2

RD5A1/ASS1/QDPR/ACAT1/HAMP/HPN/VTN/ARG1/CYP1A1/BAAT/PCK2/CPB2/RGN/OTC/CPS1/PCK1  
C/CORO1C/STX6/HGS/SNX10/SNF8/LAMTOR1/RNF26/CHMP3/VPS28/MVB12A/VPS18/CHMP1A/PLEK  
PRKX/BASP1/STAT1/SIX2/JAG1

ENO1/SLC2A6/TGFB1/GAPDH/UCK2/HK2/PFKFB4/NME1/NUP62/PFKFB3/TMSB4X/NME2/PGK1/SIRT  
GPNMB/HAVCR2/CD74/PRNP/PAG1/TNFAIP8L2/VTCN1/VSIG4/JAK3/CD86/CD300A/SOCS1/IRF1/C  
RUVBL1/MAPK3/PYGO2/MRGBP/BRCA1/MCRS1/ACTL6A/LEF1/RPS6KA4/NOC2L/HCF1/IL1B/TAF9/  
RKA/NUP62/ESPL1/NSMCE2/TGFA/IL1B/ANAPC11/RANBP1/NSFL1C/HNRNPU/BTC/BECN1/ANAPC5/  
F1A/PRELI1D1/PDCD1/ADAM8/KDELRL1/IL2RA/CD27/DFFA/FADD/BCL10/IDO1/LGALS14/DOCK8/RP  
/GPI/PGLS/RPIA/HK1

/EXOSC9/EXOSC10/EXOSC7/EXOSC2

STN/LGALS9/SRC/RAC2/ATP13A2/ECT2/TGFB1/ITGAM/AACS/GAPDH/RIPK2/HAVCR2/FLNA/ITGB2  
MP12/ANXA2/COL1A1/ICAM1/POSTN/SULF1/MFAP2/ITGB4/TIMP1/ITGA3/MMP11/SPINT2/MMP14/

MA7/PSMB3/PSMA1/PSMB5/PSMA4/PSMB1/PSMB6/ENC1/PSMA3/PSMB7  
RL1/RAB7B/LYN/PELI1/LBP/TNFAIP3

2RX5/CCL4/CCL3/LMCD1/CALM2/PTBP1/SPPL3/HTT/CALM3/CIB1  
1/UBE2L3/DCUN1D5/MASTL/UBE2N/STUB1/RAB1A/PIN1  
51A1/SOD1/HMGCS1/ACACB/APOE/POR/PROX1/SC5D/PPARGC1A/TM7SF2/GPAM/APOB/INSIG1/SEC  
LAMF7/TUBB4B/VAV1/PRDX1/LAG3/ULBP2/PTPN6/ARRB2/GZMB  
2/KDM1A/TAF9/PSMD10/PTTG1IP/TWIST1/ATAD5/BDKRB2/ING2/DYRK3  
1/RHNO1/BAX/NPM1/PCNA/BMF/COPS9/E2F4/NOC2L/ATF4/KDM1A/PARP1/CRIP1/RUVBL2/CARD16  
5/SERPINE1/CORO1C/JAG1/ITGB1BP1  
L4B/POLD3/CHD1L/RPS27A/ERCC1/UBA52/RFC5/GTF2H1/RPA1/ERCC3/DDB1  
DBNL/PTPN1/MAP3K10/DAXX/CCL19/MAP4K1/MAP4K2/DAB2IP/MAP3K9/MAP3K11/MUL1/MAP3K12/  
MIF/NUPR1/PERP/BCL2L12/DYRK2/DDIT4/BCL3/KDM1A/PMAIP1/TAF9/IFI16/PML/E2F2/MSH2/M  
X9/CDK1/NDRG1/LIF/SERPINE2/TGFB1/HDAC11/GSTP1/CLCF1/C1QA/GPC1/S100A8/GRN/CXCR4/

/CDC25B/AURKA/TYMS/AGRN/C1QA/C1QL1/SLC26A6/B4GALT5/FLVCR1/HIF1A/PPP2R1A/NRCAM/F  
S/DLG3/SCRIB  
/CROCC/WRAP73/TBC1D7/DNM2/TCTEX1D2/ODF2L/VDAC3/MARK4/CENPJ/IFT20/HTT/DZIP1/EVI5  
/POLR3C/MAVS/IRF5/TLR2/DHX9/TLR7/TLR8/POLR3F/POLR3A/RNF135/TICAM1  
/DRG1/MAPT/STMN2/DCTN1/MECP2/CDK5R1/NIN  
8/JAK3/CD86/SEMA4A/CD300A/EBI3/CD3E/TCIRG1/SASH3/SOCS1/IRF1/CD83/PLA2G2D/LEF1/Z  
XO4/AUNIP/POLA1/BARD1/XRCC6/POLQ/BABAM1/XRCC4/OGG1/PRPF19/WRAP53/DCLRE1B/NBN/PI

6/PDSS1/XRCC6/RRM1/FARSA/KRT10  
AM8/PIK3CD/LYN/HCAR2/ID01/LGALS14/PIK3CB/NFKBID/ANXA1/TP53/WNT5A/CD274

C1/ESRP1/CREB3L1/CCL5/IQGAP1/MAPK3/FGFR4/SPRED1/POLR2G/POLR2H/FGFR1/NCBP2/FGFR3  
GNA12/PDCL3/DDA1/HSP90AB1/CSNK1E/HSPBP1/BCAP31/CSNK1D/AXIN1/CCDC22/GBA/DNAJB2/T  
/ITGB8/HEXB  
SOX4/SOX9/TEAD2/DBN1/ASF1B/COL1A1/CHST11/NEK2/GINS1/SULF1/TM4SF1/ACSL4/SPINT2/M  
ALT5/NEU1/GM2A/GLTP/SMPD2/B4GALT3/B3GALNT1/ASAHI/CLN3/GBA/CLN6/FA2H/SMPD4/A4GAL  
K1D/DCTN2/CEP250/NSFL1C/BICD1/MARK4/NEDD1

SAL3/TWSG1/TNFRSF14/XCL1/PTPRC/SH3RF1/CCR2/HLA-E/ARG2/ZBTB7B/CD274/ZAP70

BICC1/FZD6/TLE3/MDFI/PSMB9/DDIT3/PSMD14/MAD2L2/PSMD2/FZD1/IGFBP6/MLLT3/HDAC1/LZ  
SERPINE2/TYROBP/TGFB1/GPNMB/HAVCR2/CD74/PKN1/PRKCD/PRNP/PAG1/HMGB3/TNFAIP8L2/VT  
OXF2

2/CHMP3/PTPN23/SNX12/RAB29/VPS11/SNX3  
ENO1/SLC2A6/TGFB1/GAPDH/HK2/PFKFB4/NME1/NUP62/PFKFB3/TMSB4X/NME2/PGK1/SIRT6/NUP



R3B/SORD/GBA3/G6PC  
/NEURL1

/PYCARD/ST6GALNAC4/TMEM132A/SLC2A1/PKMYT1/CTSC/CHST11/KDEL3/B4GALNT1/CLSTN1/HIA/E2F1/CDCA5/NUF2/ASF1B/CDK1/NDC80/MCM2/CDC45/NEK2/GINS1/BUB1/BUB1B/MCM4/ORC6/OI1/PYCARD/PLBD1/ANXA2/NCF2/GLA/CTSC/ITM2C/SLC2A6/SRC/MMD/ATP13A2/DAB2/LAPTM5/FA/MCM2/CENPF/CHAF1B/RAD51/SPI1/CBX2/UHRF1/CDKN2A/DSCC1/SMARCD3/OIP5/CBX6/MCM7/PLM/HMGA1/CDT1/KIF4A/AURKB/CENPA/CDCA8/TOP2A/TRIP13/E2F1/CDCA5/RECQL4/NUF2/ASF1B/2T/CDCA8/TOP2A/NCF2/PKMYT1/HJURP/NEK2/FBLIM1/ITPR3/MKI67/ORC6/DAB2/NFKBIE/SAPCDI1/PYCARD/PLBD1/ANXA2/NCF2/GLA/CTSC/ITM2C/SLC2A6/SRC/MMD/ATP13A2/DAB2/LAPTM5/FA/MMD/ATP13A2/DAB2/LAPTM5/CKAP4/HLA-DMA/CD74/P2RX4/DRAM1/HLA-DRB1/ABCD1/LAMP5/HLI1/PYCARD/PLBD1/ANXA2/NCF2/GLA/CTSC/ITM2C/SLC2A6/SRC/MMD/ATP13A2/DAB2/LAPTM5/FAB/E2F1/CEP55/CTSC/CDK1/NDC80/CDC45/NEK2/DLGAP5/CDC25B/KIF23/NDRG1/WDR62/CCNE1/C/AURKB/TPX2/TACC3/TOP2A/E2F1/CEP55/SNCG/CTSC/CDK1/NDC80/CDC45/NEK2/DLGAP5/CDC25/TPX2/TACC3/CDCA8/KIF20A/CDC6/SNCG/CDK1/NEK2/DLGAP5/CDC25B/BUB1B/PRC1/KIF23/WDRCAM1/ARPC1B/SH3BP1/FBLIM1/ANXA5/CDCA3/ITGB4/ITGA3/KIF23/NDRG1/PLAUR/RAC2/DAB2/M1/ATP13A2/RHOV/RCC2/GPNMB/DKK1/HLA-DMA/SLC39A4/PMEPA1/IRAK1/PLIN3/STEAP1/SCAMP5/CER1G/KDEL3/TMC6/ITPR3/LHFPL2/CD3D/LGALS3/PLAUR/RAC2/ATP13A2/DAB2/FABP5/TYROBP/ANLN/ARPC1B/FBLIM1/MICAL1/SRC/RAC2/MISP/POF1B/PDLIM7/CORO1A/MARCKS/FLNA/TNNT1/67/ZWINT/RMI2/KIF18B/S100A14/CKAP4/RAD51/TONSL/EXO1/CDC25C/SQSTM1/DDX39A/ZIC2/S13/PPT1/FOLR1/STX3/SNAP25/CDK16/PLIN3/CD74/SCGN/SCAMP5/HLA-DRB1/SLC6A9/LAMP5/HLOA/LPCAT1/IMPDH1/PYCARD/LGALS3BP/CYBA/BACE2/LCN2/ADGRE5/ANXA2/NCF2/GLA/CTSC/COLCER1G/KDEL3/TMC6/ITPR3/LHFPL2/CD3D/LGALS3/PLAUR/RAC2/DAB2/FABP5/TYROBP/CKAP4/IM/HMGA1/CDT1/AURKB/CENPA/CDCA8/E2F1/CDCA5/RECQL4/NUF2/ASF1B/CDK1/NDC80/HJURP/NCAP1GAP/PYCARD/ST6GALNAC4/BACE2/TMEM132A/SLC2A1/PKMYT1/CTSC/POSTN/CHST11/KDEL3/2/GLA/CTSC/ITM2C/SLC2A6/MMD/ATP13A2/DAB2/LAPTM5/FABP5/CKAP4/PYGB/PPT1/CTSV/HLA-1/ATP13A2/RHOV/RCC2/GPNMB/DKK1/HLA-DMA/SLC39A4/PMEPA1/IRAK1/PLIN3/STEAP1/SCAMP5/NUF2/ASF1B/CDK1/NDC80/MCM2/CDC45/GINS1/BUB1/BUB1B/MCM4/ORC6/ORC1/CHAF1B/P3H4/RDS/SNCG/ANXA2/CDKN3/REG1A/ITM2C/BUB1B/SRC/ITGA3/CLIC1/NCS1/NDRG1/NFKBIE/CENPF/CAM1/ARPC1B/SH3BP1/FBLIM1/ANXA5/CDCA3/ITGB4/ITGA3/KIF23/NDRG1/PLAUR/RAC2/DAB2/M/PYCARD/ST6GALNAC4/BACE2/TMEM132A/SLC2A1/PKMYT1/CTSC/POSTN/CHST11/KDEL3/SULF1/MMD/ATP13A2/DAB2/LAPTM5/CKAP4/HLA-DMA/CD74/P2RX4/DRAM1/HLA-DRB1/ABCD1/LAMP5/HLB/TPX2/KIF20A/TUBA1C/SLC2A1/TUBA4A/CRYAB/ENO1/DBN1/CDK1/COL1A1/NEK2/STMN1/MFAP2B/TPX2/KIF20A/TUBA1C/SLC2A1/TUBA4A/CRYAB/ENO1/DBN1/CDK1/COL1A1/NEK2/STMN1/MFAP2OA/LPCAT1/IMPDH1/PYCARD/LGALS3BP/CYBA/BACE2/LCN2/ADGRE5/ANXA2/NCF2/GLA/CTSC/COLB/TPX2/KIF20A/TUBA1C/SLC2A1/TUBA4A/CRYAB/ENO1/DBN1/CDK1/COL1A1/NEK2/STMN1/MFAP2/KIF20A/TUBA1C/TUBA4A/DBN1/CDK1/NEK2/STMN1/MICAL1/SRC/PRC1/KIF23/KRT23/TUBA1B/NQSTM1/BOP1/RBM38/SNRPB/SMG5/IGF2BP1/SF3B4/DCAF13/NUP62/TUBB/LARP6/MEX3A/ALYREF/51/SPI1/UHRF1/SMARCD3/PLCB1/RAD51AP1/RCC1/EZH2/MUC1/EME1/ZNF385A/HMGB3/CREB3L1/A/TUBA1C/TUBA4A/CDK1/NEK2/STMN1/PRC1/KIF23/TUBA1B/NDRG1/TUBA3C/DNM1/KIFC1/KIF18LIM1/ANXA5/ITGB4/ITGA3/KIF23/PLAUR/RAC2/DAB2/MMP14/MPZL1/MISP/PDLIM7/ARL2/FLNC/LIM1/ANXA5/ITGB4/ITGA3/KIF23/PLAUR/RAC2/DAB2/MMP14/MPZL1/MISP/PDLIM7/ARL2/FLNC/LIM1/ANXA5/ITGB4/ITGA3/KIF23/PLAUR/RAC2/DAB2/MMP14/MPZL1/MISP/PDLIM7/ARL2/FLNC/FPL2/LGALS3/PLAUR/FABP5/TYROBP/CKAP4/ITGAM/CYBB/STX3/CD44/ITGB2/ALDH3B1/SNAP25/NXA2/DBN1/REG1A/SH3BP1/ITGB4/SRC/RAC2/PDLIM7/ENAH/CORO1A/STX3/TNFRSF12A/CD44/PL/CENPA/CDCA8/CDCA5/RECQL4/NUF2/CDK1/NDC80/HJURP/NCAPG/MCM2/NEK2/BUB1/BUB1B/MCM4/MMD/ATP13A2/DAB2/LAPTM5/CKAP4/HLA-DMA/CD74/P2RX4/DRAM1/HLA-DRB1/ABCD1/LAMP5/HLP512/RPS2/MRPL47/MRPL9/MT3/RPL17/RPLP2/MRPS23/RPSA/RPL10L/RPS5/RPS21/MRPL12/RPLNCS1/BCAS4/SNAP25/EIF4EBP1/CCT5/CASP4/RPL8/UBL4A/CCT6A/DTNBP1/PSMD14/CCT3/PSMD2/CENPA/TOP2A/CDCA5/NUF2/NDC80/HJURP/NCAPG/NEK2/BUB1/BUB1B/MKI67/ZWINT/CENPF/P3H

OR01A/STX3/CD44/ITGAV/IGF2BP1/VASP/FGD3/NME2/TWF2/SCRIB/PLEK2/CFL1/FSCN1/CARMIL  
/CENPA/CDCA8/CDCA5/NUF2/NDC80/HJURP/NCAPG/NEK2/BUB1/BUB1B/ZWINT/CENPF/CENPH/TTK  
NRPD1/SNRPA1/SNRPA/SF3A2/LSM4/HSPA8/EFTUD2/PPIH/RBM3/YBX1/PABPC1/SNRPE/TXNL4A/S  
PS2/MRPL47/MRPL9/RPL17/RPLP2/RPSA/RPL10L/RPS5/RPS21/MRPL12/RPL7/RPL28/MRPS34/RP  
P1/ITGB2/COTL1/MVP/CSTB/NME2/TRPM2/QPCT/TNFAIP6/ATAD3B/PSMD14/TIMP2/HSPA6/ALOX5  
BP5/PYGB/PPT1/CTSV/GPC4/GPC3/AGRN/SDC3/CD74/PRKCD/VCAN/VAT1/GPC1/UNC13D/TUBB/LY  
NEK2/DLGAP5/CDC25B/PRC1/WDR62/CENPF/MISP/AURKA/UNC119/PSRC1/TUBG1/FAM110A/KIF11  
RC/PDLIM7/TNFRSF12A/PLEKH01/ARHGEF2/ITGAV/NME1/PLEK/FGD3/NME2/EZR/KIF18A/CFL1/F  
A/CEP55/SLC2A1/ANXA2/CDK1/ANLN/NEK2/MICAL1/PRC1/KIF23/CENPF/ECT2/RCC2/AURKA/PSR  
3/ITGAM/CYBB/ITGB2/SNAP25/PTAFR/QSOX1/CSTB/LYZ/TRPM2/QPCT/TNFAIP6/CD53/PLAU/ATA  
P5/CKAP4/PYGB/STX3/PRKCD/VAT1/UNC13D/TUBB/LYZ/CTSA/TUBB4B/GRN/SYNGR1/DNAJC5/DDO  
F23/KIFC1/KIF18B/AURKA/CLIP2/KLC2/TRIM54/KIF11/WDR34/KIF12/KIF3C/KIF18A/KIF21B/  
P5/CKAP4/PYGB/STX3/PRKCD/VAT1/UNC13D/TUBB/LYZ/CTSA/TUBB4B/GRN/SYNGR1/DNAJC5/DDO  
EN1/POLD1/MCM7/PIF1/MCM3/EZH2/ALYREF/CHEK1/NABP2/MCM5/SIRT6/PRKDC/CBX1/ACD/NSMC  
SYK/TAP1/ZYX/NCF4/FMNL1/RAB34/NCF1/ATP6VOB/ATP6VOD2/RAB32/UNC93B1/STXBP2/TCIRG1  
/CENPA/NUF2/NDC80/HJURP/NEK2/BUB1/BUB1B/ZWINT/CENPF/CENPH/TTK/SKA1/SPC24/SKA3/S  
STB/NME2/QPCT/TNFAIP6/PSMD14/TIMP2/HSPA6/ALOX5/PLEKH02/MIF/CANT1/CFD/FTH1/PSMD2  
RPL9/RPL17/RPLP2/RPL10L/MRPL12/RPL7/RPL28/RPL39/RPL35A/MRPL13/RPL27/RPL35/RPL18  
/CENPA/NUF2/NDC80/HJURP/NCAPG/NEK2/BUB1/BUB1B/ZWINT/CENPF/CENPH/SKA1/AURKA/SPC2  
FLNA/TPM4/COTL1/HCK/TWF2/EZR/RHOQ/WIPF3/CARMIL1/TPM2/IQGAP1/LCP1/TPM3/PAK1/PALL  
/NUF2/NDC80/HJURP/NEK2/BUB1/BUB1B/ZWINT/CENPF/CENPH/SKA1/SPC24/SKA3/SPC25/CENPW  
D1/MCM7/PIF1/MCM3/ALYREF/NABP2/MCM5/SIRT6/PRKDC/CBX1/ACD/PCNA/XRCC3/PPP1CA/CBX3  
1/HLA-DQA1/NRGN/HLA-DRA/HLA-DQB1/RHOQ/HLA-DPA1/AREG/HLA-DPB1/CLTA/HLA-DQB2/HLA-  
TP1A1/GPNMB/STX3/YWHAZ/NAP1L1/BSG/TRPV2/CALU/RAN/TFRC/DTNBP1/SYNGR1/DNAJC5/RAB3  
TP1A1/GPNMB/STX3/YWHAZ/NAP1L1/BSG/TRPV2/CALU/RAN/TFRC/DTNBP1/SYNGR1/DNAJC5/RAB3  
A/RPL10L/RPS5/RPS21/RPL7/RPL28/RPL39/RPL35A/RPS3/RPL27/RPL35/RPS20/RPL18A/RPS19  
KIF18B/MISP/ECT2/NUSAP1/SKA1/RCC2/AURKA/RACGAP1/KIF11/NUP62/SPAG5/MAPRE1/MAD2L1  
C3/CD74/VCAN/GPC1/CTSA/IFI30/CTSK/TCN2/EPDR1/HSPA8/NEU1/GM2A/RNASET2/GYG1/FMOD/  
BUB1/BUB1B/P3H4/RAD51/AURKA/NCAPD2/TUBG1/NCAPH/RCC1/CENPO/CHEK1/UBE2I/BRCA1/SGO  
LSM4/EFTUD2/SNRPE/TXNL4A/SNRPF/LSM7/U2AF2/SF3B5/SNRPC/BUD31/SNRNP40/PPIL1/RBMX2  
/PRKCD/VAT1/UNC13D/TUBB/LYZ/CTSA/TUBB4B/GRN/GM2A/FUCA2/STK11IP/RNASET2/MNDA/PTG  
SF3A2/EFTUD2/PABPC1/SNRPE/SNRPF/LSM7/BUD31/SNRNP40/PPIL1/LSM2/ISY1/EIF4A3/PRPF6  
1QA/COL4A5/EMILIN2/C1QL1/COL16A1/COL3A1/COL5A1/COLEC12/EDA/C1QTNF1/COL5A2/COL6A  
CD2BP2/LSM4/EFTUD2/PPIH/SNRPE/TXNL4A/SNRPF/LSM7/LSM10/SF3B5/SNRPC/GEMIN7/SNRNP4  
5/PTAFR/TRPM2/CD53/PLAU/CD300A/ITGAX/RAP2B/SIRPA/DYNLL1/NBEAL2/OLR1/ADAM8/SLC11  
CD2BP2/LSM4/EFTUD2/PPIH/SNRPE/TXNL4A/SNRPF/LSM7/LSM10/SF3B5/SNRPC/SNRNP40/RBMX2  
RRP1/RRP7A/FBL/NOC2L/EMG1/NOP58/ZNF593/UTP18/UTP14A/FBXW9/BYSL/RRP36/SNU13/FTSJ  
1/PIF1/MCM3/DNMT1/POLA2/GINS4/PCNA/XRCC2/XRCC3/RFC2/BLM/PRIM1/WDHD1/ZMIZ2/DONSO  
PL7/RPL28/RPL39/RPL35A/RPL27/RPL35/RPL18A/RPLP0/RPL18/RPL23/RPL38/RPL23A/RPL7A/  
CD2BP2/LSM4/EFTUD2/PPIH/SNRPE/TXNL4A/SNRPF/LSM7/SF3B5/SNRPC/SNRNP40/RBMX2/LSM2/  
/MISP/NUSAP1/SKA1/AURKA/PSRC1/SKA3/TUBG1/KIF11/MAPRE1/KIF18A/CENPE/CAPN6/KNTC1/  
F23/UNC119/CEP131/QSOX1/CDC7/GSTM3/PPP1R13L/RFXANK/TRIM45/RAB35/AGBL5/USB1/EHD2  
LC2/KIF11/KIF12/KIF3C/KIF18A/KIF21B/CENPE/KLC3/KIFC2/KIF14/KIFC3/KIF15/KIF2A  
LSM4/EFTUD2/SNRPE/TXNL4A/SNRPF/LSM7/SF3B5/RBMX2/LSM2/RNF113A/PRPF3/SNU13/PRPF6/  
LSM4/EFTUD2/SNRPE/TXNL4A/SNRPF/LSM7/SF3B5/RBMX2/LSM2/RNF113A/PRPF3/SNU13/PRPF6/  
CDK4/CDKN2D/PCNA/CKS1B/CCNO/CDK2/CDK7/CCND2/CCND3/CCNJL/CCNE2  
/UNC119/RACGAP1/MAPRE1/KIF18A/CENPE/KIF14/CTTN/CDC42/APP  
BUB1B/AURKA/CENPO/SGO1/CENPK/DSN1/KMT5C/CENPB  
CENPO  
SKA3

HLA-DQB1/HLA-DPA1/HLA-DMB/HLA-DPB1/HLA-DQB2/HLA-DQA2/HLA-DRB5

A2/IKBKE/IL2RG/SRC/MMD/PTP4A3/NDRG1/ATP13A2/MMP14/KIFC1/CLSTN1/ATP1A1/RHOV/RCC2  
P/UBE2S/CDK1/BUB1B/CKS2/CCNE1/CCNA2/CCNF/CBX2/DTL/PHF19/SNRPB/CHML/POLD1/DCAF13  
CYBB/STX3/ITGB2/ALDH3B1/SNAP25/QSOX1/ITGAV/LYZ/TRPM2/QPCT/CD53/PLAU/CHIT1/TIMP2  
ALDH3B1/SNAP25/ITGAV/TRPM2/CD53/PLAU/DNAJC5/RAP2B/DEGS1/C3AR1/OLR1/SLC2A5/ADAM8  
1/EME1/HSF1/TRIM28/SIRT6/WDR76/CBX1/PHC2/HDAC1/INCENP/CBX3/TCP1/DNMT3A/SIRT7/PM  
/ITGAX/TCIRG1/DOK3/FPR1/SIRPA/CD58/DYNLL1/NBEAL2/NCKAP1L/ADAM8/SLC11A1/RAC1/LAM  
18A/RPL18/RPL38/LARP4B/RPL7A/RPS23/RPL6/RPL36/RPL19/DHX9/RPL32/RPL30/LARP1/RPL4  
/TCP1/DNMT3A/SIRT7/KMT5C/CENPB/BEND3/CBX5/PCGF2/ESCO2/RNF2/NCAPD3  
PXD2B/LCP1/PALLD/ADAM8/CTTN/SH3GL1/WDR1/VCL/BIN2/DBNL/PTPN12/VCAM1  
RPE/TXNL4A/SNRPF/LSM7/LSM2/PRPF3/SNU13/PRPF6/SNRPG/PRPF31/SART1/LSM8/USP39/PRPF  
RPE/TXNL4A/SNRPF/LSM7/LSM2/PRPF3/SNU13/PRPF6/SNRPG/PRPF31/SART1/LSM8/USP39/PRPF  
CD/CFL1/ALOX5/MAP2/RUVBL1/NARF/PCNA/LMNA/CAD/NUP93/NUP205/ZNF703/BLM/NONO/ATF4/

CANT1/B4GALT5/FUT4/CHPF2/PSENEN/SORT1/B4GALT3/PITPNM1/ST3GAL4/BCAP31/LYPLA2/CLN  
RB1/TSPAN15/LAMP5/HLA-DRA/STARD3NL/HLA-DMB/CHMP4B/VPS37C/TMEM165/MICALL1/CD63/C  
S21/VBP1/RPL39/GCN1/MSI2/RPS3/MSI1/EIF3H/AGO2/CALR/RPL18A/FUS/RPL18/VIM/RPL38/D  
ATP6V0B/ATP6V0D2/RAB32/TCIRG1/HLA-A/RAB7B/SLC11A1/RAB20/RAB10/ATP6V0C/HLA-B/ATP

COL3A1/LAMC1/COL5A1/LAMC2/LAMA5/ADAMTSL5/COL5A2/TNC/LUM/COL4A2/LAMB3/EMILIN1/CO  
1/ANAPC7/CBX4/ANAPC11/BARD1/CBX8/PCGF2/RBX1/RNF7/RNF2/ANAPC5/CDC27/PCGF3/ANAPC4  
2/GINS4/PCNA/PRIM1/WDHD1/ZMIZ2/TIPIN/POLA1/PRIM2/RPA2/POLD3/TIMELESS/PRPF19/SMA

/HLA-DPA1/HLA-DPB1/HLA-DQB2/HLA-A/HM13/BCAP31/HLA-DQA2/HLA-DRB5/HLA-B/CALR/SPPL  
/HLA-DPA1/HLA-DPB1/HLA-DQB2/HLA-A/HM13/BCAP31/HLA-DQA2/HLA-DRB5/HLA-B/CALR/SPPL  
P7/NOP58/SNRNP40/POP1/SNU13/NOP10/GAR1/POP5

HLA-DQB1/HLA-DPA1/HLA-DMB/HLA-DPB1/HLA-DQB2/HLA-A/HLA-DQA2/HLA-DRB5/HLA-B  
HSP90AB1/CCT4/CCT7/TCP1/BAG3/PPP5C/CCT8/PTGES3/BAG2/CDC37  
EAD4/E2F5/HES6/ARNTL2/ARNT2/CDK4/TLE3/SOX12/MXD3/GTF3C6/NPAS2/DDIT3/HNF1B/TCF3/  
ITGA3/PLAUR/SLC34A2/FOLR1/CD44/PLEKH01/KCNJ11/ARHGEF2/ITGAV/SLC7A11/NME1/VASP/A  
/DHTKD1/OGDHL

3/SERPINA4/APOH/SPP2

0A1

APOA5/APOC3

/APOA2/APOH/APOA1/APOA5/APOC3

/APOA2/APOH/APOA1/APOA5/APOC3

MC6/ITPR3/CLIC1/NUDT1/RAC2/LMNB2/ALOX5AP/CENPF/LMNB1/CYBB/GAPDH/CLGN/DTL/CMTM3/  
ME1/PLEK/EZR/CFL1/ITGA5/PDE4A/LCP1/PAK1/CORO1C/PPP1R9B/PIP5K1C/HIP1R/FERMT1/RAC  
COL11A1

COL11A1

4/APOB/APOC1/APOA2/APOF/APOH/LCAT/PON1/HPR/APOA1/APOA5/APOC3

L3/ZYX/MICALL2/FSCN1/LCP1/TPM3/LIMCH1/PDLIM3/SH2B2/CORO1B/VIL1/MST1R/SIPA1L3/BA  
RPF/LSM7/SF3B5/SNRPG/ZMAT5/PHF5A/ZRSR2/SF3B3/DHX15/SNRNP25/SF3B2/SF3B6/SNRPD3

HLA-DRB1/HLA-DQA1/NRGN/UNC13D/HLA-DRA/HLA-DQB1/TFRC/HLA-DPA1/AREG/DNAJC5/HLA-DP

1/CD74/HLA-DRB1/HLA-DQA1/NRGN/HLA-DRA/HLA-DQB1/TFRC/HLA-DPA1/AREG/DNAJC5/HLA-DP  
-DQA1/NRGN/HLA-DRA/HLA-DQB1/TFRC/HLA-DPA1/AREG/DNAJC5/HLA-DPB1/CLTA/HSPA8/HLA-D

POM/APOC4/LIPC/SAA4/APOB/APOC1/LPA/APOA2/APOF/APOH/LCAT/PON1/HPR/APOA1/APOA5/AP  
POM/APOC4/LIPC/SAA4/APOB/APOC1/LPA/APOA2/APOF/APOH/LCAT/PON1/HPR/APOA1/APOA5/AP

UTP14A/SNU13/NOC4L/UTP11/UTP4/UTP6/HEATR1/RPS7/NOL6/UTP20/NOL10/UTP23/WDR46/IMP  
LAMP5/HLA-DQA1/NRGN/HLA-DRA/SYNGR2/HLA-DQB1/RAB11FIP5/HLA-DPA1/DTNBP1/AREG/SYNG  
POM/APOC4/LIPC/SAA4/APOB/APOC1/LPA/APOA2/APOF/APOH/LCAT/PON1/HPR/APOA1/APOA5/AP  
PM/NCKAP5L/CAMSAP2/KNSTRN/MYO5A/CKAP5/DCTN1  
HMP4B/CLTA/AP4M1/COPE/HIP1R/COPZ1/AP3M2/NECAP2/CLTB/AP2M1/NCALD/AP2S1/EPS15L1/V  
HMP4B/CLTA/AP4M1/COPE/HIP1R/COPZ1/AP3M2/NECAP2/CLTB/AP2M1/NCALD/AP2S1/EPS15L1/V  
SF3B5/RBMX2/SF3A3/SNRPG/SNRPB2/PHF5A/HTATSF1/SF3B2/SF3B6/SNRPD3

/MLYCD/ACOT2/NUDT7/ECI2/ACOX1/ACAA1/HSD17B4/AMACR/GRHPR/SCP2/PHYH/FABP1/CAT/EPH  
/MLYCD/ACOT2/NUDT7/ECI2/ACOX1/ACAA1/HSD17B4/AMACR/GRHPR/SCP2/PHYH/FABP1/CAT/EPH  
/TAX1BP3/E2F5/CCDC137/TCOF1/EZR/ANKRD1/NOP56/CD2BP2/APEX2/PES1/DKC1/CDCA7L/CD3E  
T80/NME1/NME2/KRT7/IFFO2/SLC1A4/PLEC/NARF/LMNA/KRT18/KRT8/FAM83H/EVPL/NES/MYO5A

/NOC4L/RRP7BP/UTP4/UTP6/HEATR1/KRI1/NOL6/UTP20/FAM207A/BMS1/RSL1D1/IMP4

RM1/PSMB4/PSMB8/PSMB10/PSMA5/DNAJB2/PSMD13/PSMC4/USP14/PSMD10/PSMD11/PSMD1/PSMA  
OC/PITPNM1/PSTPIP1/RAB11FIP4/PPP1CC/CIT/PLK4/KLHDC8B/RALA/HTR3A/NDE1/NF2/SPIRE1  
ICALL2/FSCN1/LCP1/TPM3/STX1A/LIMCH1/PDLIM3/SH2B2/CORO1B/MST1R/SIPA1L3/BAG3/FHOD  
SH3BP1/SAPCD2/MISP/RHOV/CORO1A/MARCKS/AGTRAP/FLNA/CIB2/TPM4/COTL1/TRIP10/MAPRE1  
D74/HLA-DRB1/HLA-DQA1/NRGN/PACS1/HLA-DRA/HLA-DQB1/RHOQ/HLA-DPA1/AREG/HLA-DPB1/C  
/CIB2/TPM4/COTL1/MAPRE1/EZR/DCDC2/CFL1/EPB41L2/WIPF3/FLOT2/FCHSD1/TIGD5/WIPF1/H  
LR2H/PRIM1/TAF9/CDK7/POLA1/POLR2L/KAT2A/PRIM2/POLR2K/POLR3D/POLR3H/POLR3C/TAF12  
A1/HLA-DRA/SCAMP3/HLA-DQB1/HLA-DPA1/HLA-DPB1/CLTA/TMEM165/HLA-DQB2/AP4M1/STX6/S  
APH2

19/DECR2/ACBD5/MGST1/ALDH3A2/SYT7/PEX11A/PEX11G/ACOX1/PXMP2/ACSL6/HSD17B4/PECR/  
19/DECR2/ACBD5/MGST1/ALDH3A2/SYT7/PEX11A/PEX11G/ACOX1/PXMP2/ACSL6/HSD17B4/PECR/  
SNAP25/CDK16/RACGAP1/CBX6/NPTX2/HCK/EZR/GNA15/TRAFF2/CHMP4B/TRAFF5/IQGAP1/GNAZ/CD  
LR2H/PRIM1/TAF9/CDK7/POLA1/POLR2L/KAT2A/PRIM2/POLR2K/POLR3D/POLR3H/POLR3C/TAF12  
P3M2/NECAP2/CLTB/AP2M1/NCALD/AP2S1/EPS15L1/AP1G2/AP1B1/AP2A2/AP3B1/CLTC/AP1S1/A  
AX/ITGB5/LYN/ITGA2/ITGB8/EMILIN1

C2/ARPC3/CBX3/AUNIP/WAS/PARP1/CBX5/RFWD3/RPA2/TIMELESS/ARPC1A/PRPF19/ESCO2/ARPC  
FCH01/CD74/ITGAV/HLA-DRB1/RAB31/SYK/HLA-DQA1/TAP1/ZYX/HLA-DRA/NCF4/HLA-DQB1/FMN  
11/ARHGEF2/ITGAV/NME1/VASP/ADORA1/PLEK/LAMP5/EZR/PLEK2/CFL1/ITGA5/PDE4A/LCP1/PA  
1/ALOX5/RUVBL1/CAD/ZNF703/BLM/NONO/KRT8/ATN1/XPOT/AKAP8L/SFPQ/DNMT3A/PML/NSMF/R  
LR2H/PRIM1/TAF9/CDK7/POLA1/POLR2L/KAT2A/PRIM2/POLR2K/POLR3D/POLR3H/POLR3C/TAF12  
D3/RHOC/RHOF/PITPNM1/RTKN/PSTPIP1/RAB11FIP4/PPP1CC/CIT/PLK4/KLHDC8B/RALA/HTR3A/  
RM1/PSMB4/PSMB8/PSMB10/PSMA5/DNAJB2/PSMD13/PSMC4/USP14/PSMD10/PSMD11/PSMD1/PSMA

RPING1/ORM1/ORM2/FGB/F5/FGG/FGA/SERPINF2/ALB/IGF2/KNG1/A1BG/PLG/AHSG/HRG  
AMP5/HLA-DRB1/RAB31/HLA-DQA1/HLA-DRA/SCAMP3/HLA-DQB1/CHST4/GRN/HLA-DPA1/RAB32/H  
D3/RHOC/PITPNM1/RTKN/PSTPIP1/RAB11FIP4/PPP1CC/CIT/PLK4/KLHDC8B/RALA/HTR3A/NDE1/  
/MYO1G/CDC42SE2/RACK1/BIN2/DNM2/SNX5/ABCA7/SYT11/ARHGAP25/ANXA1  
B1/RAB31/HLA-DQA1/TAP1/HLA-DRA/HLA-DQB1/RAB34/ATP6V0B/HLA-DPA1/ATP6V0D2/RAB32/C  
1/ATP6AP1/ATP6V1H/ATP6V1E1/ATP6V0C/ATP6V0E1/TMEM199/ATP6V0D1  
FAIP6/CHIT1/TIMP2/CANT1/FTH1/PRSS3/ILF2/ASA1/CTSS/PTPN6/GSDMD/CNN2/ALDOC/CTSD  
A2/LUM/COL4A2/COL11A1  
17C/SCAMP3/FZD7/RAB11FIP5/MICALL1/HLA-A/RAP2B/SCAMP4/RAB35/EHD1/RAB11FIP4/RAC1/

MTA3/CSNK2A1/MBD3/GATAD2A

MTA3/CSNK2A1/MBD3/GATAD2A

IP1

IP1

NPU/KIF20B

/FCH01/CD74/RGS19/HLA-DRB1/HLA-DQA1/NRGN/UNC13D/PACS1/HLA-DRA/HLA-DQB1/TFRC/HLA  
A2/PFN2/MICAL1/SRC/ITGA3/RGS10/NCS1/DNM1/FABP5/CLSTN1/ATP1A1/PPT1/GPC4/STX3/C1Q  
PDH1/PYCARD/LGALS3BP/LCN2/ANXA2/GLA/CTSC/VEGFB/TIMP1/FABP5/PYGB/TGFB1/GSTP1/COT  
/SNRNP40/PRPF6/SNRPG/DDX23

A-DQB1/HLA-DPA1/HLA-DPB1/CLTA/HLA-DQB2/CTLA4/RAB35/HIP1R/HLA-DQA2/FZD2/HLA-DRB5  
ARPC5/ACTR3

ELESS

/KNSTRN/MYO5A/CKAP5/DCTN1

D1/RUVBL1/TAF6/MCRS1/WDR77/SNRPE/SNRPF/HDAC2/HCFC1/TRMT61A/KDM5B/TAF9/TRMT6/KDM  
/ITIH3/SERPINA4/APOH/SPP2

N/OIP5/PLCB1/ALYREF/GLIS2/AP5Z1/CARMIL1/TCF3/NROB1/SNRPA1/STK17A/SF3A2/SDCBP2/C  
C/TUBA1B/ATP1A1/ITGAM/PPT1/BIRC3/ITGB2/MAL2/LAT2/RGS19/PRNP/HCK/GPC1/TUBB/SERPI  
2/FSCN1/LCP1/TPM3/LIMCH1/PDLIM3/SH2B2/CORO1B/MST1R/SIPA1L3/BAG3/FHOD1/CNN2/TRIP  
2/FSCN1/LCP1/TPM3/LIMCH1/PDLIM3/SH2B2/CORO1B/MST1R/SIPA1L3/BAG3/FHOD1/CNN2/TRIP  
C/TUBA1B/ATP1A1/ITGAM/PPT1/BIRC3/ITGB2/MAL2/LAT2/RGS19/PRNP/HCK/GPC1/TUBB/SERPI  
SYTL1/MUC20/DPEP1/SLC26A2/CDHR2

8

5/SLC6A9/LAMP5/MTMR2/UNC13D/SYNGR2/GIPC1/DTNBP1/SYNGR1/DNAJC5/TRAPPC4/BRSK1/RAB  
BP3/E2F5/CCDC137/TCOF1/EZR/ANKRD1/NOP56/CD2BP2/APEX2/DKC1/CDCA7L/CD3EAP/B3GNT9/  
ROS1/CD36/VWF/SERPING1/ORM1/ORM2/FGB/F5/FGG/SERPINA5/FGA/SERPINF2/ALB/IGF2/KNG1

PSMD11/PSMD1/PSMD4/PSMD3/PSMD7/PSMD8/PSMD9/PSMC3/PSMC5

AX/ITGB5/CTLA4/LYN/ITGA2/ITGB8/EMILIN1

A9/LAMP5/MTMR2/SYNGR2/GIPC1/DTNBP1/SYNGR1/DNAJC5/TRAPPC4/BRSK1/RAB15/CLTA/SYT8/  
C/TUBA1B/ATP1A1/ITGAM/PPT1/BIRC3/ITGB2/MAL2/LAT2/RGS19/PRNP/NUP62/HCK/GPC1/TUBB  
D2/MISP/CORO1A/FLNA/CIB2/TPM4/COTL1/MAPRE1/ASPH/EZR/DCDC2/CFL1/EPB41L2/WIPF3/FL  
SNAP25/CDK16/RACGAP1/CBX6/NPTX2/HCK/EZR/GNA15/TRAFF2/CHMP4B/TRAFF5/FKBP1A/IQGAP1/  
SFL1C

ACK1/MCTS1/RPS7/RPS23/RPS10/RPS15/RPS16/RPS27A/RPS12/RPS4X/UBA52/RPS11/RPS9/RPS  
FUT4/CHPF2/PSENNEN/SORT1/B4GALT3/PITPNM1/ST3GAL4/BCAP31/UXS1/B4GALT7/B4GALT2/FUT  
ITGA3/RGS10/NCS1/GPRIN1/DNM1/ARHGAP4/AURKA/STX3/SNAP25/CPLX2/KCNJ11/P2RX4/HSPB1

PSENNEN/SORT1/B4GALT3/PITPNM1/ST3GAL4/BCAP31/UXS1/B4GALT7/B4GALT2/FUT3/GOLGA3/FU  
X12/MXD3/GTF3C6/DDIT3/TCF3/TRIM28/HIF1A/PYGO2/BCL9/TAF6/CD3EAP/E2F8/E2F3/E2F4/P  
4/MRPL13/MRPL10/MRPL52/MRPL48/DAP3/MRPS7/MRPL53/MPV17L2/MRPS17/MRPS21/MRPS15/MR  
4/MRPL13/MRPL10/MRPL52/MRPL48/DAP3/MRPS7/MRPL53/MPV17L2/MRPS17/MRPS21/MRPS15/MR  
7/CD3E/CARD11/LCK/SNX27/CD6/GZMB/GZMA/STX7/BCL10

2L1/HSP90B1/HSPA13/P4HB

PDH1/PYCARD/LGALS3BP/LCN2/ANXA2/GLA/CTSC/VEGFB/TIMP1/FABP5/PYGB/TGFB1/ADA/GSTP1  
1/MELK/ANLN/SH3BP1/CENPF/SAPCD2/AKR1B1/MISP/RHOV/ADA/CORO1A/MARCKS/AGTRAP/FLNA/  
GPRIN1/ARHGAP4/STX3/SNAP25/CPLX2/P2RX4/CBX6/IGF2BP1/ADORA1/LAMP5/NPTX2/GIT1/TWF

/DTL/DCAF13/TRAF2/RBCK1/FBXL19/CACYBP/MAD2L2/RNF19B/SHARPIN/PHC2/BRCA1/MED10/CK  
 FBXW9/FTSJ3/PPAN/LAS1L/EBNA1BP2/EIF6/NIP7/RPF1/WDR12/ZNF622/RRP15/MAK16/WDR74  
 M1/AP2S1/VPS18/AP1G2/AP3D1/AP1B1/AP2A2/AP3B1/AP1S1/AP1S2/AP2B1/AP2A1/VPS33A/AP5  
 OT4/PEX1/NOS2/PEX19/DECR2/CRAT/ECH1/ACBD5/MGST1/LONP2/HMGCL/MLYCD/ALDH3A2/SYT7/  
 OT4/PEX1/NOS2/PEX19/DECR2/CRAT/ECH1/ACBD5/MGST1/LONP2/HMGCL/MLYCD/ALDH3A2/SYT7/  
 3/SOX12/DDIT3/POLA2/GINS4/PRKDC/NUPR1/ACD/NPM1/PCNA/LEF1/POLR2H/PRIM1/PARP1/DON  
 RPF31  
 PG1/TMEM199/COPG2/PACIN1/COPB2/COPB1/ARF1/COPA/ACTR1A/CCDC88A/ARCN1/ARFGAP3/SC  
 SMD10/PSMD11/PSMD1/PSMD4/PSMD3/PSMD7/PSMD8/PSMD9/PSMC3/PSMC5  
 NRPF/SNRPG/SNRPD3/PRMT5/ERH  
 /WRAP53/NOP10/GAR1/HNRNPU/NVL/SNRPD3/SMG7/HNRNPC  
 L1/AP2A2/CLTC/AP2B1/AP2A1  
 PDH1/PYCARD/LGALS3BP/LCN2/ANXA2/GLA/CTSC/VEGFB/TIMP1/FABP5/PYGB/TGFB1/ADA/GSTP1  
 /COTL1/DCDC2/CFL1/EPB41L2/WIPF3/FLOT2/FCHSD1/TIGD5/WIPF1/HIP1R/LASP1/FLOT1/CAP1  
  
 PZP/PROS1/APOE/FCN3/FCN2/SERPING1/ORM1/C1S/HBB/ORM2/CFB/C3/CFH/ANGPTL4/VTN/FGB/  
  
 CBX4/RBBP4/MTF2/CBX8/PCGF2/RBBP7/CSNK2A1/RNF2/CSNK2B/TRIM37/PCGF3/CSNK2A2/ASXL1  
 /NUTF2/NUP210/NUP93/NXT1/NUP205/NUP37/NDC1/NUP188/KPNB1/XPOT/NUP85/NUP43/AGFG1/  
 /ESCO2  
 /RPS20/RPS19/RACK1/MCTS1/DAP3/MRPS7/RPS7/RPS23/RPS10/MRPS17/MRPS21/RPS15/RPS16/  
 CNE1/CCNA2/CCNF/POLD1/MCM3/CDK4/CDKN2D/POLA2/MAD2L2/TAF6/POLR2G/PCNA/CD3EAP/SOC  
 ABRA3/GABRR3/BEST1/TTYH2/GABRD/TTYH1/CFTR/GABRB3/CLCNKA  
  
 2/CCNF/CDK4/CDKN2D/PCNA/CKS1B/CCNO/CDK2/CDK5/CDK7/CCND2/IKBK/ACVR1/CCND3/ACVR1  
 RPC/NOP58/ISG20/PRPF3/PRPF31/FAM118B/SART1/WRAP53/NOP10/GAR1/ZPR1/HSPB7/SART3/T  
  
 MA7/PSMB3/PSMA1/PSMB5/PSMA4/PSMB1/PSMB6/PSMA3/PSMB7  
  
 AP25/CBX6/IGF2BP1/LAMP5/NPTX2/TWF2/DLG3/NECTIN1/TRPV2/ORAI2/KIF21B/DTNBP1/FSCN1  
  
 CAPD3/SMC2  
 LC35A2/A4GALT/CHST2/TPST1/POMGNT1/CHST12/MFNG/LFNG/B4GALNT2/SYS1/SLC35B1/SLC35A  
 1/ATP6AP1/ATP6V1H/ATP6VOC/ATP6VOE1/TMEM199/ATP6VOD1  
 S1/AP1G2/AP1B1/AP2A2/AP3B1/AP1S1/AP2B1/AP2A1/AP4B1/HIP1/AFTPH/AP3M1  
 OT2/EFNA5/CD2/THY1/RTN4RL2/ULBP2/PRSS22/FOLR2/LYPD3  
 AX/UQCRH/MRPL17/CYC1/TIMM17B/MRPS12/MRPL47/MRPL9/TOMM5/UQCC3/MCU/DLAT/VDAC1/MRP  
  
 QSTM1/ANKRD13D/CD74/HLA-DRB1/TSPAN15/LAMP5/UNC13D/HLA-DRA/STARD3NL/GRN/DDIT3/HL  
 OMER3/CRYAB/DBN1/REG1A/NRSN2/TMPRSS3/ITPR3/RGS10/ZWINT/ACSL4/NCS1/ATP13A2/DNM1/  
 PR1/C3AR1/CD68/CPNE1/LAMTOR1/NFAM1/ATP6VOC/RAB3D/VAMP8/RAB5C/PSAP/GLIPR1/MANBA/  
 16/RACGAP1/HCK/GNA15/IQGAP1/GNAZ/GNA12/GNGT1/PLEKHA4/LYN/GNG5/GNB1/FGR/LCK/STAC  
 2/NUP93/NUP205/NUP37/NDC1/NUP188/DYNLT1/KPNB1/CD209/NUP85/NUP43/VPS28/RAE1/MVB1  
 2/NUP93/NUP205/NUP37/NDC1/NUP188/DYNLT1/KPNB1/CD209/NUP85/NUP43/VPS28/RAE1/MVB1  
  
 AP25/CBX6/IGF2BP1/LAMP5/NPTX2/TWF2/DLG3/NECTIN1/TRPV2/ORAI2/KIF21B/DTNBP1/FSCN1  
  
 1/DNM1/FABP5/CLSTN1/ATP1A1/ARHGEF2/P2RX4/NCK2/SLC6A9/ADORA1/PRNP/ABHD17C/MTMR2/



EPDC1B/ECT2/ARL2/ARHGAP4/RACGAP1/CHML/NCAPH/ADAP1/PLCB1/DEPDC1/GMIP/GIT1/ASAP1/  
2/KIF20A/CRYAB/STMN1/PRC1/KIF23/NDRG1/DNM1/KIFC1/KIF18B/NUSAP1/SKA1/RCC2/GAPDH/  
PFKP/ENO1/ANXA2/DBN1/ANLN/EPCAM/SRC/CLIC1/ARHGEF16/NDRG1/YWHAZ/FLNA/FXYD5/PLIN3  
RGS10/NUDT1/RAC2/TUBA3C/DNM1/ARL2/RHOV/ARL4C/TUBG1/RGS19/RAB42/HRAS/RAB31/TUBB/  
5/VEGFB/TFF2/LIF/CSF1/S100A14/TGFB1/BAMBI/CLCF1/GDF15/SYK/CKLF/PGF/IL18/LTB/TRA  
ECT2/ARL2/ARHGAP4/RACGAP1/CHML/ADAP1/PLCB1/DEPDC1/GMIP/GIT1/ASAP1/ADAP2/TBC1D16  
ECT2/ARHGAP4/RACGAP1/CHML/ADAP1/PLCB1/DEPDC1/GMIP/GIT1/ASAP1/ADAP2/TBC1D16/RANG  
TIMP1/LIF/CSF1/TGFB1/CMTM7/CLCF1/GDF15/CMTM3/CKLF/IL18/TNFRSF11B/GRN/LTB/AREG/C  
YAB/PRC1/KIF23/NDRG1/DNM1/KIFC1/KIF18B/NUSAP1/SKA1/RCC2/GAPDH/PSRC1/CLIP2/FCH01  
4/RFC4/RAD51/EXO1/NEIL3/RAD54L/MCM6/FEN1/DSCC1/GINS2/POLD1/MCM7/NME1/PIF1/MCM3/  
1A/MARCKS/FLNA/TPM4/COTL1/USH1C/TWF2/EZR/FMNL1/TMEM201/CFL1/MICALL2/FSCN1/WIPF3  
QGAP3/RCC2/ARHGAP4/FLNA/PKN1/ARHGEF2/ITPKA/CDC42EP1/FGD3/FMNL2/FMNL1/ARHGEF39/Y  
/RAC2/CCNE1/CCNA2/TRIB3/CCNF/TGFB1/CDKN2A/HSPB1/CDK4/CDKN2D/CCL5/IQGAP1/EFNA5/M  
NPF/FBLN1/RAD51/STIP1/CORO1A/KCNJ11/TAX1BP3/HRAS/MAPRE1/MAD2L1/DLG3/EZR/MID1IP1  
/NCAPD2/UHRF1/PHF19/PKN1/RCC1/YEATS2/PYGO2/VPS72/NPM1/MLLT3/SMARCA4/CKS1B/STAT1  
RPL47/MRPL9/RPL17/RPLP2/MRPS23/RPSA/RPL10L/RPS5/RPS21/MRPL12/RPL7/RPL28/MRPS34/  
MCM7/NME1/MCM3/RAD51AP1/HSF1/NABP2/MCM5/HMGB2/RBBP8/POLR2G/YBX1/DDX11/SUB1/REXO  
SMG5/MVP/DLG3/CSF1R/TRAFF2/JAK3/IQGAP1/SLC9A1/SIRPA/PPP6R1/STAT1/PPP1R9B/PPP1CA/  
H/VASP/ADAM9/ADAM15/SH2D2A/DNAJC6/NCF1/WIPF3/WASF2/CD3E/SIRPA/WIPF1/HIP1R/SH3KB  
PFDN4/CCT6A/CCT3/HSPA6/PDRG1/HSPA8/NUDC/NPM1/CHAF1A/PPIH/CCT2/HSP90AB1/PPIA/CCT  
ITGB2/CIB2/S1PR2/FERMT3/ITGAV/LAMB1/ADAM9/SYK/ADAM15/CD151/COL16A1/COL3A1/COMP/  
LC2/KIF11/WDR34/KIF12/KIF3C/KIF18A/KIF21B/CENPE/KLC3/DYNLRB1/DYNLL1/DYNC1H1/KIF  
/MCM7/PIF1/MCM5/CHTF18/CHD3/XRCC2/SMARCA4/XRCC3/ERCC6L/RFC2/DDX11/BLM/CDK7/MSH2  
BSG/BAIAP2L1/NRCAM/SIRPA/PALLD/KRT18/PPP1CA/PAK4/CD47/GLDN/RAB10/TACSTD2/EMB  
2L1/KRT18/PPP1CA/PAK4/RAB10/TACSTD2  
SMARCA4/HSP90AB1/LONP1/PTGES3/NAT10/HSP90AA1/CDK2AP1

100B/S100A13

PFKP/AURKB/TK1/IKBKE/PKMYT1/CDK1/MELK/NEK2/MAPK12/UAP1L1/BUB1/TYRO3/BUB1B/SRC/M  
XOSC4/IGF2BP3/ZNF385A/ESRP1/YBX3/CSTF2/PCBP4/SLPI/UPF3B/RBM3/EIF2S2/RPS2/PABPC1  
/EIF4EBP1/SMG5/MVP/SYK/DLG3/CSF1R/TRAFF2/JAK3/IQGAP1/PPP1R18/SLC9A1/SIGLEC10/MAP  
/RAD54L/MCM6/DDX39A/DSCC1/GINS2/MCM7/PIF1/MCM3/MCM5/DHX34/GINS4/DHX37/RUVBL1/CH  
/NAA10/SNRPA/SEC61A1/OLA1/CD2BP2/PES1/NPM1/PPIH/RBM3/PELO/PPP1CA/ZC3H12A/RPSA/S  
/MCM6/DSCC1/GINS2/MCM7/PIF1/MCM3/MCM5/GINS4/RUVBL1/CHTF18/CHD3/ERCC6L/RFC2/DDX11

/RAC2/CCNE1/CCNA2/TRIB3/CCNF/TGFB1/GSTP1/CDKN2A/HSPB1/CDK4/CDKN2D/CCL5/IQGAP1/E  
LCB1/TWF2/ASAP1/ADAP2/FZD7/PLEK2/NCF1/TPCN1/SH3PXD2B/SLC9A1/SDCBP2/RAB35/HIP1R/  
N1/ARHGEF2/ITPKA/FMNL1/VAV1/IQGAP1/PAK1/CORO1C/DVL3/NCKAP1L/PAK4/ARHGDIB/WAS/DV  
10/MCM7/MCM3/MCM5/DDX11/POLA1/MCM8  
M5/CHTF18/CHD3/RFC2/POLQ/DNA2/RAD18/RFC5/DHX9  
M5/CHTF18/CHD3/RFC2/POLQ/DNA2/RAD18/RFC5/DHX9  
PFDN2/PFDN1/DFFA/CALR/HSPA2/HSPA5/HSPA14  
M5/CHTF18/CHD3/RFC2/POLQ/DNA2/RAD18/RFC5/DHX9



S100B/ANXA11  
TTN

BSG/BAIAP2L1/NRCAM/SIRPA/PALLD/KRT18/PPP1CA/PAK4/RPSA/ITGA2/CD47/GLDN/RAB10/TAC

2C8/CYP3A4

M/ACADL/ACADSB  
/MCM5/GINS4/BLM  
M5/CHTF18/RFC2/POLQ/DNA2/RAD18/RFC5/DHX9  
M5/CHTF18/RFC2/POLQ/DNA2/RAD18/RFC5/DHX9  
P1A2/CYP2C8/CYP2C9/CYP3A4

P4F12/CYP3A43/CYP3A5/CYP2A7  
PFKP/AURKB/IKBKE/PKMYT1/CDK1/MELK/NEK2/MAPK12/BUB1/TYRO3/BUB1B/SRC/MMD/MAPK13/C  
A1B/TRIB3/MAGEC2/AURKA/SQSTM1/YWHAZ/SMG5/TUBB/FZD6/DLG3/SCAMP3/RANGAP1/TRAF2/TR  
/MAPK8IP2/ADAP2/SH2D2A/DOK2/SMARCD1/FSCN1/TRIM6/IQGAP1/ARPC4/SLC9A1/SH2D3A/HSPA  
1/HLA-DQB2/HLA-DQA2  
DH1A1/ALDH7A1/ALDH1L1/ALDH2  
YP4F2/CYP2B6/CYP4A11/CYP2E1/CYP2C8/CYP2C9/CYP2A6  
27A2/ACSM5/ACSM2B/ACSM2A

DH/SCP2/ACADL/ACOT12/ALDH6A1  
C/CES3/AADAC  
3/SCP2/ACSM5/ACSM2B/ACSM2A  
G5/APOA2/APOA1/APOA5  
G5/APOA2/APOA1/APOA5  
YP2A7/CYP4F2/CYP2B6/CYP4A11/CYP2E1/CYP2C8/CYP2C9/CYP2A6  
LC51A/SLC01B3/SLC01B1/SLC10A1  
/SLC01B3/SLC01B1/SLC22A7  
1B/ADH4  
CSM5/ACSM2B/ACSM2A/SLC27A5  
/ETNPPL/AGXT/TAT  
/ABAT/ETNPPL/AGXT/TAT  
IB3/MAGEC2/AURKA/SQSTM1/YWHAZ/SMG5/TUBB/FZD6/DLG3/SCAMP3/RANGAP1/TRAF2/TRIM28/C  
MB/HSPA8/HSP90AB1/ANXA11/HLA-DOA/HSP90AA1  
L5/ACSL1/SLC27A2/ACSM5/ACSM2B/ACSM2A/SLC27A5  
LC6A12/SLC6A1/SLC13A5/SLC10A1  
/HPD  
DAC1/NOC2L/HDAC2/HMG4/SSRP1/ACTB/MTA2/NAP1L4/SMARCB1/CHD4/RBBP4/SMARCC1/CABIN1

/HPD  
SM3/ACSL5/ACSL1/SLC27A2/ACSM5/ACSM2B/ACSM2A/SLC27A5  
P5/RBP4/ADH4  
/RDH5/SRD5A2/RDH16/HSD11B1/HSD17B6  
A/CDK4/CDKN2D/CKS1B/CCNO/CDKN2B/CDKN1C/CDKN2C/CCND2/CCND3/CCNJL/CCNE2/CDK5R1  
YP3A43/CYP1A1/CYP3A5/CYP2A7/CYP1A2/CYP2B6/CYP2E1/CYP2C8/CYP2C9/CYP2A6/CYP3A4  
COX2/AOX1/DAO  
7A5/SLC1A4/SLC43A2/SLC7A8/SLC3A2/SLC7A10/SLC36A1/SLC38A5  
/AKR1C4/RDH5/SRD5A2/RDH16/AKR1D1/HSD11B1/HSD17B6/HSD17B13  
CC2/XRCC3/BLM/MSH2/RAD51C/ABL1/RAD51D/RAD18  
3/S100A13/FIBP/FGFR2/RPS19/GLG1/THBS1  
LC2/KIF11/WDR34/KIF12/KIF3C/KIF18A/KIF21B/MYL6B/CENPE/KLC3/DYNLRB1/DYNLL1/DYNC1  
  
A14/CKLF/CCL5/CCL26/STAT1/CCL13/CNIH4/CCL2/CXCL9/CXCL3/CXCL13/DEFB1/CCL28/CCL4/

/LYN/FGR/LCK/SLA/MATK/BTK/ABL1/CSK/PTK2/TNK2  
H3PXD2B/SIGLEC10/FGFR1/SYNGR3/LCK/PTPN6/SIT1/AFAP1/RACK1/ABL1/RUFY1/PTK2/INPPL1  
RL2/RHOV/ADA/ARL4C/TUBG1/ARL14/RAB42/NME1/ADORA1/HRAS/RAB31/TUBB/MX2/NME2/GUCY2  
RL2/RHOV/ADA/ARL4C/TUBG1/ARL14/RAB42/NME1/ADORA1/HRAS/RAB31/TUBB/MX2/NME2/GUCY2  
YP2A13/CYP27A1/CYP39A1/CYP3A43/CYP1A1/CYP3A5/CYP2A7/CYP1A2/CYP7A1/CYP2B6/CYP2E1  
HB2/PLEK/ADAP1/PLCB1/NRGN/TWF2/ASAP1/ADAP2/NCF4/FZD7/PLEK2/NCF1/TPCN1/IQGAP1/SH  
AKR1C4/CYP4F12/CYP27A1/FMO4/FAXDC2/FMO5/CYP1A1/CYP4F3/FMO3/AKR1D1/CYP4F2/CYP7A1  
SL5/ACSL1/SLC27A2/ACSM5/ACSM2B/ACSM2A/SLC27A5  
O2/CYP3A7/CYP1A1/CYP3A5/CYP2A7/ALB/CYP2E1/CYP8B1/CYP3A4

D1/BHLHE41/BRMS1/GMNN/HIF1A/RFXANK/HSP90AB1/HDAC1/BEX4/LEF1/HDAC2/RAC1/AKAP8L/M  
AADAT/GOT2/ALAS1/CSAD/GPT2/SHMT1/GPT/SDS/AGXT2/CTH/ABAT/ALB/ETNPPL/AGXT/TAT  
AADAT/GOT2/ALAS1/CSAD/GPT2/SHMT1/GPT/SDS/AGXT2/CTH/ABAT/ALB/ETNPPL/AGXT/TAT

CLYBL/HOGA1/ACMSD/CSAD/SHMT1/PCK2/ALDOB/PCK1

/NR1H4/NR4A1/THRB/PPARA/RORA/ESR1/AR/RORC/NR1I2/NR1I3  
H9A1/BCKDHB/ALDH1A1/AKR1C4/ALDH7A1/DHTKD1/ALDH5A1/ALDH1L1/OGDHL/ALDH2/ALDH8A1/A  
1/AVPR1A/PIK3R1/CRHBP/LEPR/GHR/GCGR  
/NR1H4/NR4A1/THRB/PPARA/RORA/ESR1/AR/RORC/NR1I2/NR1I3  
2B1/ABCB11/SLC51A/SLC01B3/RBP4/SLC01B1/SLC22A1/AQP9/SLC10A1

2/IFNA8/IFNA6/IFNA16/IFNA10

AV/ADAM9/GPC1/ADGRG1/CD248/RPSA/ITGA2/CTSS/SPOCK2/SPOCK1/PLEKHA2/BGN/LYPD3/ECM1

CI2/EHHADH/GSTA1

SLC16A4/SLC01A2/SLC02A1/AKR1C4/SLC22A9/SLC6A13/SLC16A2/SLC02B1/ABCB11/MFSD2A/SL  
RL2/RHOV/ARL4C/TUBG1/ARL14/RAB42/NME1/HRAS/RAB31/TUBB/MX2/NME2/GUCY2C/RABL6/RHO  
RL2/RHOV/ARL4C/TUBG1/ARL14/RAB42/NME1/HRAS/RAB31/TUBB/MX2/NME2/GUCY2C/RABL6/RHO  
A4/SLC6A12/SLC6A1/GNMT

K5/GRB2/CBL/CHN1/ABL1/PTPN1/CDK5R1

CO1/CA4/CBS/ECHS1/ECHDC2/HSD17B4/CA14/ALAD/CA5A/ENO3/EHHADH/UROCI

P8/BRCA1/PCNA/PNKP/BLM/AUNIP/MSH2/RPS3/XRCC6/POLQ/MUTYH/OGG1/RPA2/CUL4B/DCLRE1B  
1/PIGU/PLEKHB2/PLEK/ADAP1/PLCB1/NRGN/TWF2/ASAP1/ADAP2/NCF4/FZD7/PLEK2/NCF1/SNX7  
CASP1/CARD16/CARD18/BCL10/MAVS

C1/NR1H4/NR4A1/ABHD2/NROB2/NR3C2/THRB/PPARA/HNF4A/GPER1/RORA/ESR1/AR/RORC/NR1I2  
HNSL2/SLC1A1/GLUL/GLUD1/ASS1/GOT2/TDO2/SHMT1/NAGS/DPYS/OTC/AGXT/CPS1/GNMT/TAT  
DECR2/DECR1/ACADVL/BDH2/RETSAT/DHODH/ACAD11/ACADS/SRD5A1/ACOX1/ACAA1/IVD/GCDH/A  
PYGL/OXER1/PPARA/HNF4A/ACACB/PC/CYP26A1/STARD5/ACOX1/SCP2/RIDA/FABP1/SERPINA5/A  
H/HADH/NUDT6/GLUD1/ALDH1A1/QDPR/HSD17B8/GRHPR/GPD1/CRYL1/ALDH2/SORD/AOX1/ADH4

/ABCG8/ABCG5/APOA2/APOA1/APOA5

MB/HSPA8/HSP90AB1/ANXA11/CD8A/HLA-DOA/HSP90AA1

LA-DQB1/HLA-DPA1/HLA-DPB1/HLA-A/SLC7A8/CD209/HLA-DRB5/HLA-B

RL2/RHOV/ARL4C/TUBG1/ARL14/RAB42/NME1/HRAS/RAB31/TUBB/MX2/GUCY2C/RABL6/RHOG/TUB  
/ADAP2/SH2D2A/DOK2/FSCN1/TRIM6/ARPC4/SLC9A1/SH2D3A/HSPA8/STX1A/SH2B2/HIP1R/LASP  
VRK1/PRKAA2

/AASS/MTHFD1/PIPOX/DMGDH

C/KRT17/AGRN/TUBG1/TUBB/TUBB4B/MSN/ARPC4/PLEC/TUBB6/TUBA1A/TUBB2A/ARPC2/ARPC3/A

P5/RBP4/ADH4

1/LAG3/CD8A/CLEC7A/VCP/TAPBP/TAP2/CD4/HLA-E/DERL1/LILRB1/LILRB2

P3A4

P62/RBCK1/CXCR4/RNF19B/SHARPIN/CKS1B/NPLOC4/OTUB1/ADRM1/CBX4/DNAJB2/PML/VPS28/R

/NOL3/LEF1/MT3/BIRC7/VIL1/CD27/CASP1/DPEP1/RACK1/BAD/PRDX5

L/RANGRF/KPNB1/XPOT/XP05/RANBP1/SERGEF/IP013/XP07/TNP01/IP09/IP04/RANBP3

LC22A3/SLC1A1/SLC23A2/SLC13A3/SLC28A1/SLC6A13/SLC17A4/SLC1A2/SLC6A12/SLC17A2/SL

A5/HLA-DRA/HLA-DQB1/HLA-DPA1/HLA-DPB1/HLA-A/PPP2R1A/SIRPA/SPON2/SLC7A8/LAG3/CD2  
NSL2/CA4/CBS/ECHS1/ECHDC2/HSD17B4/CA14/ALAD/CA5A/ENO3/ETNPPL/EHHADH/UROCI

AT1/BID/TNFSF13B/TNFSF12/TRAF3/FADD/PIDD1/TRADD/TNFSF15/CASP8/TRAF4/TMBIM1/TRIM  
DH1A1/AKR1C4/ALDH7A1/ALDH5A1/ALDH1L1/ALDH2/ALDH8A1/ALDH6A1/ADH4

/NPM1/SPRED1/SOCS1/CDKN2B/CDKN1C/SOCS3/PPP1R1B/CDKN2C/GMFG/RACK1/PKIA/PRKRIP1/D

G5/APOA2/APOA1/APOA5

7/RPL5/GLMN/AUP1/RPL11

COL9A2/AGRN/VCAN/COL4A5/EMILIN2/LAMB1/COL16A1/COL3A1/LAMC1/COMP/COL5A1/MFGE8/FR  
YD/CHDH/MMACHC/NOS2/ETFA/ACADVL/FMO2/ACAD11/ACADS/POR/MAOB/CRY2/ETFDH/ACOX1/IVD  
AS2R43/TAS2R19/TAS2R46/TAS2R31/TAS2R10/TAS2R8/TAS2R9/TAS2R50/TAS2R39/TAS2R16/TA

A/ITGA2/CTSS/PLEKHA2/LYPD3/ECM1/ACHE/THBS1

CL5/NTS/REG1A/VEGFB/TIMP1/SEMA6A/NMB/LYPD1/LGALS3/LIF/CSF1/TGFB1/CMTM7/GPNMB/ST

R4/OR5F1/OR5P2/OR5I1/OR5P3/OR8H1/OR5L2/OR5H1/OR8U1/OR8K3/OR8J1/OR5AP2/OR5A1/OR8  
/SRD5A1/PECR/TM7SF2/SRD5A2/AKR1D1  
MGN4/ACTB/MTA2/SMARCB1/CHD4/RBBP4/SMARCC1/HMGN1/MBD3/HMGN2/HMGA2/HNRNPC/MBD2  
T3/BIRC7/VIL1/CD27/DPEP1  
TAB1/GLRX3/TXN/ERO1A/DNAJC10/PDIA6/TXNDC17/TXNDC12/ENOX2/GFER/GLRX2/PDIA3/SC02/  
RAB11FIP5/TBC1D16/MICALL2/TRAPPC4/MICALL1/ATP6AP1/ANKRD27/DENND2D/TBC1D1/GDI1/T  
7/ITPR2/SCP2/RBP5/APOA2/APOF/RBP4/APOA1/APOA5/APOC3/ADH4  
PLSCR1/ARF4/GRB2/CBL/TNK2/HBEGF/BTC/EREG/EGF/RNF126/VAV3/ATXN2/HIP1/SOCS5/SNX2

NA6/SERPINA5/AMBP/ITIH2/SERPINA7/SERPINA11/SERPINF2/ITIH3/SERPINA4/ITIH1/SERPIN  
RL2/RHOV/ARL4C/TUBG1/ARL14/RAB42/NME1/HRAS/RAB31/TUBB/MX2/NME2/GUCY2C/RABL6/RHO  
RL2/RHOV/ARL4C/TUBG1/ARL14/RAB42/NME1/HRAS/RAB31/TUBB/MX2/NME2/GUCY2C/RABL6/RHO  
P62/RBCK1/CXCR4/RNF19B/SHARPIN/CKS1B/NPLOC4/OTUB1/ADRM1/DNAJB2/VPS28/RAE1/MVB12

NA4/SYK/HCK/DDR1/CSF1R/JAK3/PKDCC/PDGFRL/MAP2K2/FGFR4/EPHB6/DYRK2/EPHB3/FGFR1/F  
5A1/QDPR/GRHPR/TM7SF2/FMO4/CAT/FMO5/FMO3/ASPDH

A1/CYP2C18/CYP17A1/CYP26A1/MSMO1/CYP3A7/DBH/KMO/AKR1C4/CYP2J2/CYP2A13/CYP4F12/A

5/MMP1/ADAMDEC1/MMP10/MEP1A/MMP2/ECE2/ADAM8/RCE1/ADAM12/ADAM19/ADAMTS9/ADAM23/M

11/PUS1/U2AF2/SNRPC/SSB/DAZAP1/CBX4/MSI2/EIF4A3/ILF3/MSI1/AGO2/RBPMS/CBX8/PABPC  
ENPF/SPI1/HDAC11/YWHAZ/FLNA/TEAD4/CDKN2A/PKN1/E2F5/ARHGEF2/SMARCD3/HES6/ARNT2/D  
1/ATP6AP1/ATP6V1H/ATP6V1E1/ATP6VOC/ATP6VOE1/ATP6VOD1  
1/ATP6AP1/ATP6V1H/ATP6V1E1/ATP6VOC/ATP6VOE1/ATP6VOD1  
D3/ELF3/NME2/ANKRD1/MAGED1/SOX12/PSMC3IP/SMARCD1/HMGB2/TCF3/TRIM28/NFKB2/RUVBL1  
ASE1/EXOSC4/TSEN54/RNASE6/WDR4/SLFN13/DHX34/DHX37/NT5C3A/JMJD6/RNASET2/POLR2G/F

A47

OC3

PGRMC1/SHBG/ESR1/GC/SCP2/SERPINA6/APOA2/AR/RORC/APOF/AKR1D1/APOA1/APOA5/HSD11B1

S7/TRAF4

3B/TNFSF12/TRAF3/FADD/TRADD/TNFSF15/CASP8/TRAF4/TRIM37

/ABL1/RAD51D

/CCL26/CCL13/CCL2/CXCL9/CXCL3/CXCL13/CCL28/CCL4/CXCL16/PF4V1/CXCL11/XCL2

L/NPR2/THRB/EDNRB/GPER1/RAMP1/VIPR1/ALDH1A1/AVPR1A/PIK3R1/SHBG/CRHBP/LEPR/CHRNA

C6A1

S2R20/TAS2R1/TAS1R1/TAS2R43/TAS2R19/TAS2R46/TAS2R31/TAS2R10/TAS1R2/TAS2R8/TAS2R  
CI2/GCDH/SCP2/ACADL/ACOT12/ALDH6A1

1F/ATP6V0B/ABCC4/ATP6V0D2/ATP6V1C1/TCIRG1/ATP6AP1/ATP13A1/ATP6V1H/ATP6V1E1/ATP6  
1F/ATP6V0B/ABCC4/ATP6V0D2/ATP6V1C1/TCIRG1/ATP6AP1/ATP13A1/ATP6V1H/ATP6V1E1/ATP6

9/APOM/SLC02A1/AKR1C4/APOC4/SLC22A9/FABP1/SLC02B1/TTPA/MTTP/APOB/ABCA8/ABCG8/AB  
G5/APOA2/APOA1/APOA5

MTHFS/SUCLG2/PC/GLUL/ACSS3/ASS1/ACSL6/ACSM3/ACSL5/ACSL1/MTHFD1/SLC27A2/ACSM5/AC  
/THNSL2/GOT1/CBS/ACACB/MTHFS/PC/AADAT/GOT2/DBH/RBP7/ALAS1/DHTKD1/GC/CSAD/GPT2/P  
/SUOX/CYP11A1/CBS/CYP2C18/CYP17A1/CYP26A1/CYB5D2/HBB/STEAP4/TDO2/CYP3A7/CYP2J2/  
PNPLA3/ABHD6/ACOT2/ASPG/LIPG/CES1/ABHD1/BPHL/CES4A/LIPC/PLA2G12B/BCHE/BAAT/CES2

H1/COMP/MRC2/CTSK/P3H1/PAK1/ADGRG1/C1QTNF1/ITGA2/CTSS/PDGFA/SPOCK2/SPOCK1/COCH/  
3A1/COL5A1/COL5A2/COL6A3/COL6A2/COL4A2/COL8A2/COL11A1/COL9A3

SLC22A1/SLC25A47

/GRAMD1B/GSDMD/PLEKHN1/PACSLN2/SESTD1

MER3/CXCL5/ITGB4/TFF2/NMB/DNM1/S100A14/BAMBI/FLNA/S1PR2/ADORA1/PRNP/APLP1/CKLF/  
E3/ANKRD1/DDIT3/BHLHE41/YBX3/TRIM28/NROB1/SIRT6/GMNN/PPP1R13L/RBBP8/BASP1/SMAR  
DK7/CDK19/CCND3/CDK11B/CDK20/CDK11A

R8D1/OR10J3/OR1F2P/OR51B5/OR2H2/OR51Q1/OR3A3/OR2B2/OR4K1/OR2W3/OR3A2/OR12D2/OR5  
8/DHRS2/AKR1C4/GRHPR/GPD1/CRYL1/RDH5/LDHD/ADHFE1/SRD5A2/DCXR/AKR7A3/BDH1/SORD/A

13A3/SLC13A5

188/NUP85/NUP155/NUP107

C2A10/SLC12A1/SLC22A3/SLC1A1/SLC23A2/SLC13A3/SLC28A1/SLC6A13/SLC17A4/SLC1A2/SLC

CL5/NTS/REG1A/VEGFB/TIMP1/SEMA6A/NMB/LGALS3/LIF/CSF1/TGFB1/CMTM7/GPNMB/STC2/DKK  
3GNT7/PLOD3/B4GALT3/B3GALNT1/B4GALT7/B4GALT2/A4GALT

8/DHRS2/AKR1C4/GRHPR/GPD1/CRYL1/RDH5/LDHD/ADHFE1/SRD5A2/DCXR/AKR7A3/BDH1/SORD/A  
/SUOX/CYP11A1/CBS/CYP2C18/CYP17A1/CYP26A1/CYB5D2/HBB/STEAP4/TDO2/CYP3A7/CYP2J2/

FC4/KIF18B/ATP1A1/RAD51/RAD54L/TNNT1/MCM6/DSCC1/MCM7/ABCD1/KIF11/PIF1/ATP6V1F/W

8/SLC20A2/SLC16A12/SLC6A2/SLC16A13/SLC16A4/SLC2A9/SLC4A4/SLC2A10/SLC12A1/SLC22A  
B1BP1/RANBP1/ARHGDI1A

/SLC1A1/SLC25A30/SLC13A3/SLC1A2/SLC13A5

P2/APOA2/RORC/APOF/APOA1/APOA5/APOC3

HNRNPU/EXOSC10/SNRPD3/SMG7/DCP2/HNRNPC/TEP1/PARN

/HIP1R/DNER/CLTB/AP2M1/NCALD/AP2S1/SYT12/SYT1/DNM1L/SYT3/AP1B1/CEMIP/SMAP1/AP2A  
TAPBP/TAP2/HLA-E/DERL1/LILRB1/LILRB2

0/HPN/CFB/PCSK6/PROC/MST1/MASP1/F2/F11/TMPRSS6/F7/LPA/PROZ/MASP2/HP/KLKB1/F12/H  
3/NIPAL2/NIPA1/NIPA2  
TTNBP2NL/PTPA/IGBP1/MAPT/ANKLE2/BOD1/PTPN1/MASTL/DAB2IP/ENSA/SMG7/MFHAS1  
HORDC1/MSH2/RUVBL2/MY09B/PPP5C/ABCG1/LONP1/VCP/CYB5R3/MY06/PRKAG1/MSH6  
M1/GSTA1

S/NSF/CANX/CDK5R1  
1/SCP2/RIDA/FABP1/APOC1/ACOX2/ALB/FABP4  
1/CYP2C18/CYP17A1/CYP26A1/SC5D/BBOX1/MSM01/CYP3A7/ADI1/CYP2J2/CYP2A13/CYP4F12/A  
AA2/GCDH/BAAT/ACOT12  
P3/HSPA2/PSAP  
MA7/PSMB3/PSMA1/PSMB5/PSMA4/PSMB1/PSMB6/PSMA3/PSMB7  
MA7/PSMB3/PSMA1/PSMB5/PSMA4/PSMB1/PSMB6/PSMA3/PSMB7  
HMGB2/TCF3/SMARCA4/ACTL6A/HDAC1/LEF1/IRF7/NONO/HDAC2/ATF4/SPIB/ACTB/SFPQ/RAI1/S  
GFOD1  
HE/SERPINA5/APOC1/CHRNA4/APOA2/APOA5  
ISG20/EXOSC5/TATDN1/RAD9A/EXOSC3/REX02/DCLRE1B/RAD1/EXOSC9/EXOSC10/EXOSC7/TOE1/  
3/PJA1/RNF24/RNF145/UBL4A/TRAF2/RBCK1/TRIM6/TRIM28/UBE2M/UBE2Z/TRIM11/RNF34/UBE

42EP2

3/SLC26A1/SLC16A4/SLC01A2/ABCC2/SFXN1/SLC25A13/SLC19A2/SLC1A1/SLC17A1/SLC25A30/  
2/HCN3/SLC4A4/SCNN1D/SLC12A1/SLC22A3/SLC1A1/SLC9B2/SLC23A2/SLC13A3/SLC28A1/SLC6  
A1/CYP2C18/CYP17A1/POR/CYP26A1/SC5D/KDM8/BBOX1/MSM01/CYP3A7/DBH/KMO/AKR1C4/CYP2

3/SLC26A1/SLC16A4/SLC01A2/ABCC2/SFXN1/SLC25A13/SLC19A2/SLC1A1/SLC17A1/SLC25A30/  
SLC26A11/SLC37A2/SLC4A3/SLC4A11/SLC26A2/SLC25A5

10/LSM2/ISG20/SNU13/PRPF31/SNRPB2/HNRNPU/LSM8/EIF5A/SART3/TOE1/PRPF4/SNRNP70/CO  
/DPYSL4  
P3/ZNF385A/YBX3/PCBP4/RBM3/PABPC1/RNPS1/ZC3H12A/DAZAP1/CPSF1/ILF3/PABPC4/RPS7/R  
1F/ATP6V0B/ATP6V0D2/ATP6V1C1/TCIRG1/ATP6AP1/ATP13A1/ATP6V1H/ATP6V1E1/ATP6V0C/AT  
Y1R

GNT9/GALNT18/B3GNT7/CHPF2/B3GALNT1/GALNT6/CHPF/B4GALNT3/B4GALNT4/B4GALNT2/GALNT

6A6/ANO10/CLCN2/SLC1A4/GABRA3/CLCN7/GABRR3/VDAC1/LRRC8B/BEST1/TTYH2/GABRD/PIDD1  
/DROSHA/AGO2/POP5/RPP30/RNASEH1/DBR1  
C6A9/SLC7A5/SLC1A7/SLC1A4/SLC43A2/SLC1A3/SLC25A22/SLC7A8/SLC7A10/SLC7A6/SLC36A1  
T11  
F3H/AGO2/EIF2B5/MCTS1/EIF3K/EIF3M/COPS5/EIF1AD/EIF3E/EIF6/EIF4G2/EIF4G3/EIF3G/E  
B/QSOX2/PDIA4  
B/QSOX2/PDIA4

7/ACAA2/GCDH/HAGH/BAAT/ACOT12

M1/CASP1/APP/RACK1/VCP/SFRP2/BAD

SOX4/E2F1/SOX9/CDC6/EN01/MCM2/CDC45/FOXJ1/NFE2L3/MCM4/ETV5/ORC6/ORC1/RAD51/LMNB

PRC1/KIF23/TUBA1B/WDR62/KIFC1/SAPCD2/KIF18B/MISP/NUSAP1/ARL2/CCNF/TTK/SKA1/AURK  
IF20A/TOP2A/TRIP13/TUBA1C/RRM2/E2F1/CDCA5/CEP55/CDC6/UBE2S/TUBA4A/NUF2/CDKN3/PK  
F/FBLN1/POF1B/PDLIM7/ECT2/BAMBI/ENAH/RHOV/RCC2/ARHGAP4/AURKA/STK26/DKK1/CORO1A/  
ALS9/SULF1/FOXJ1/SRC/TSP0/MAPK13/TYROBP/TGFB1/TRAIP/GPNMB/CYBB/GAPDH/RIPK2/HAVC  
LF1/FOXJ1/SRC/TSP0/MAPK13/TYROBP/TGFB1/TRAIP/GPNMB/CYBB/GAPDH/RIPK2/HAVCR2/IGF2  
HAVCR2/BIRC3/IRAK1/CD74/CCDC88B/PTAFR/ARHGEF2/HSPB1/SCAMP5/HRAS/SYK/PLCB1/IL18/  
DKK1/FOLR1/GPC4/KRT17/GPC3/FLNA/CD44/VASP/PGF/DDR1/FZD6/DLG3/CSF1R/FOXQ1/CD151/  
LGALS9/TMC6/LGALS3/PLAUR/RAC2/FABP5/TYROBP/CKAP4/PYGB/TGFB1/ITGAM/CYBB/LGALS1/R  
CTSC/FCER1G/LGALS9/TMC6/NDRG1/LGALS3/PLAUR/RAC2/FABP5/CSF1/TYROBP/CKAP4/PYGB/TG  
6/LGALS3/PLAUR/RAC2/FABP5/TYROBP/CKAP4/PYGB/ITGAM/CYBB/HAVCR2/GSTP1/CD44/ITGB2/  
R/FABP5/TYROBP/CKAP4/PYGB/ITGAM/CYBB/GSTP1/CD44/ITGB2/ALDH3B1/SNAP25/PTAFR/COTL  
LGALS9/TMC6/LGALS3/PLAUR/RAC2/FABP5/TYROBP/CKAP4/PYGB/TGFB1/ITGAM/CYBB/LGALS1/R  
ICAM1/LGALS9/FOXJ1/TMC6/LGALS3/PLAUR/RAC2/FABP5/TYROBP/CKAP4/PYGB/TGFB1/ITGAM/C  
3/PLAUR/FABP5/TYROBP/CKAP4/PYGB/ITGAM/CYBB/GSTP1/CD44/ITGB2/ALDH3B1/SNAP25/PTAF  
/LIF/CSF1/TYROBP/TGFB1/CMTM7/SPI1/LGALS1/RIPK2/ADA/EXO1/HAVCR2/CLCF1/GPC3/C1QC/  
S1/RIPK2/ADA/CLCF1/GPC3/C1QC/CD74/BATF/RELB/FANCD2/SLAMF8/EFNA4/NME1/SYK/CD109/  
/ARPC1B/LGALS9/VEGFB/FOXJ1/TYRO3/SRC/CD3D/LGALS3/RAC2/MMP14/LIF/CSF1/TYROBP/S10  
BIRC3/ITGB2/IRAK1/CMTM3/PRKCD/LAT2/RELB/IGLL5/HLA-DRB1/PRNP/HRAS/SYK/HLA-DQA1/H  
S/SYK/HLA-DQA1/HCK/PAG1/HLA-DRA/MUC1/EZR/HLA-DQB1/VTCN1/CARD9/PSMB9/HLA-DPA1/WI  
K2/GINS1/SRC/MCM4/NUDT1/ORC6/CCNE1/CCNA2/CENPF/RMI2/RFC4/ORC1/CHAF1B/TGFB1/RAD5  
TL/UHRF1/RAD54L/RNASEH2A/MCM6/FEN1/GINS2/FANCD2/POLD1/MCM7/PIF1/MCM3/RAD51AP1/E  
11/UHRF1/PHF19/CDKN2A/CENPW/PKN1/PRKCD/SMARCD3/OIP5/CBX6/NAP1L1/CENPO/EZH2/DNMT  
SNRPD2/HSF1/SNHG7/WDR4/SNRPD1/SNRPA1/INTS8/LIN28B/CSTF2/SNRPA/SNHG12/MRT04/SF3A  
L8/RPS6KA1/YBX3/EIF5A2/CCL5/DPH2/CNOT11/MAPK3/EIF3B/RPL36A/MRPL17/NPM1/UPF3B/PO  
LGALS9/PFN2/VEGFB/ANXA5/TMC6/MICAL1/TIMP1/LHFPL2/NCS1/LGALS3/PLAUR/RAC2/ATP13A2  
R/RAC2/CSF1/PDLIM7/S100A14/TGFB1/CMTM7/ENAH/GPNMB/CORO1A/EFNA3/GSTP1/STX3/ITGB2  
1/MAPK12/MCM4/NUDT1/NDRG1/RMI2/RFC4/CHAF1B/RAD51/TONSL/FANCI/AURKA/EXO1/NEIL3/C  
CABYR/STMN1/DLGAP5/PRC1/KIF23/TUBA1B/WDR62/TUBA3C/KIFC1/SAPCD2/KIF18B/MISP/NUSA  
DC80/CDC45/ANLN/NEK2/BUB1/DLGAP5/CDC25B/BUB1B/MKI67/ZWINT/CKS2/CCNE1/CENPF/ORC1  
L5/CDK1/HILPDA/REG1A/LGALS9/VEGFB/EPCAM/CDC25B/TIMP1/TSP0/PRC1/NMB/ETV5/RAC2/CC  
8/RRAGC/PPP2R1A/UPF3B/POLR2G/EFTUD2/PPIH/NOL3/RBM3/YBX1/PABPC1/PPP1R9B/PUF60/WD  
DIT3/RBCK1/PSMD14/FBXL19/PSMD2/NUPR1/RHBDF1/RNF34/RNF19B/SHARPIN/HM13/GNA12/DDA  
KMYT1/CDK1/NDC80/CDC45/ANLN/NEK2/BUB1/DLGAP5/CDC25B/BUB1B/MKI67/PRC1/KIF23/CCNE  
/PLAUR/RAC2/LIF/NUSAP1/ARL2/TGFB1/AURKA/PSRC1/CORO1A/YWHAZ/FLNA/PHF19/FEN1/HK2/  
TYROBP/ECT2/TGFB1/ITGAM/PNMA1/DKK1/GAPDH/RIPK2/SQSTM1/TNFRSF12A/YWHAZ/ITGB2/CDK  
1/TGFB1/LGALS1/TYMS/CDC25C/IRAK1/CD74/C1QA/ITGAV/SYK/NUP62/RCC1/HCK/TAP1/ZYX/PA  
IGF2BP3/ESRP1/RALY/RPL8/SNRPD2/HSF1/PSMB9/DDIT3/PSMD14/YBX3/SNRPD1/MAPKAPK2/SNR  
M28/BRMS1/SIRT6/NAA40/RUVBL1/JMJD6/MAPK3/PYGO2/MRGBP/BRCA1/MCRS1/ACTL6A/LMNA/HD  
MP1/TFF2/LIF/CSF1/TGFB1/TRAIP/ITGAM/LMNB1/SPI1/RIPK2/GSTP1/STX3/COL1A2/CLCF1/SQ  
MELTF/KIF18B/TGFB1/ITGAM/CTSV/DKK1/SQSTM1/C1QB/CD44/C1QC/HK2/ARHGEF2/C1QA/SMARC  
EIF2S2/RPS2/HSP90AB1/DYNC1H1/TICRR/RRS1/DDX49/RRP9/WDR77/ERI3/REX04/RRP1/BRIX1/  
P1A1/DSG2/TYROBP/POF1B/PDLIM7/ECT2/TGFB1/ENAH/RHOV/CORO1A/MARCKS/FLNA/TNNT1/TPM  
/TUBG1/S1PR2/PRKCD/NCK2/CCDC28B/HRAS/CDC42EP1/WDR34/MAPRE1/TUBB/FGD3/TWF2/ASAP1  
ROBP/POF1B/PDLIM7/ECT2/TGFB1/ENAH/RHOV/CORO1A/MARCKS/FLNA/TNNT1/TPM4/S1PR2/RACG  
SF1/TYROBP/TGFB1/CMTM7/SPI1/LGALS1/RIPK2/ADA/CLCF1/GPC3/C1QC/CD74/BATF/RELB/FAN  
109/NME2/CSF1R/CSF3R/ZNF385A/HMGB3/PRMT1/TFRC/HMGB2/JAK3/WASF2/IL34/FLVCR1/HIF1  
LGALS3/SPINT2/RAC2/MMP14/MELTF/SERPINE2/CSF1/FBLN1/ARL2/TGFB1/RCC2/GPNMB/LGALS1  
MP1/ATP13A2/DAB2/PBK/SERPINE2/TRIB3/MAGEC2/CCNF/AURKA/PPT1/CTSV/SCPEP1/SQSTM1/D  
C/TIMP1/ITGA3/SEMA6A/LGALS3/RAC2/DAB2/MMP14/SERPINE2/CSF1/S100A14/TGFB1/RCC2/AR  
3/TSP0/SEMA6A/ACSL4/NCS1/RAC2/GPRIN1/LRP12/PDLIM7/ENAH/ARHGAP4/AURKA/STK26/LGAL



3/SEMA6A/NCS1/RAC2/RCC2/ARHGAP4/LGALS1/DKK1/TNFRSF12A/CD44/AGRN/SNAP25/PRKCD/RO  
/DCAF13/NUP62/RUSC1/PJA1/MAD2L1/RNF24/RNF145/RANGAP1/PSMB9/TRAF2/RBCK1/PSMD14/S  
5/ITPR3/SRC/ITGA3/MMD/PTP4A3/ARHGEF16/LYPD1/LGALS3/RAC2/ATP13A2/DAB2/CCNE1/MMP1  
FB1/RCC2/AURKA/GPC4/YWHAZ/FLNA/CEP131/HK2/PRKCD/LAMP5/HRAS/PDIA2/SYK/ABHD17C/NU  
/MCM4/CENPF/CHAF1B/ARL2/CENPH/TGFB1/RAD51/PSRC1/HLA-DMA/CORO1A/PMEPA1/BOP1/FCHO  
G5/ABCD1/UPP1/IGF2BP1/NUP62/PFKFB3/SMG9/EXOSC4/APOBEC3B/ENTPD2/PKP3/RNASE6/TYMP  
TO4/DHX37/PES1/DKC1/TAF6/POLR2G/TRMU/FTSJ1/CD3EAP/SMARCA4/METTL1/RPS2/PELO/RRS1  
/LGALS3/PLAUR/FABP5/TYROBP/CKAP4/PYGB/ITGAM/CYBB/GSTP1/CD44/ITGB2/ALDH3B1/SNAP2  
AM/PLXNA1/SRC/TIMP1/ITGA3/SEMA6A/LGALS3/SPINT2/RAC2/DAB2/MMP14/SERPINE2/CSF1/FB  
MP14/CSF1/S100A14/TGFB1/GPNMB/CORO1A/STX3/FLNA/CD74/PTAFR/FERMT3/ARHGEF2/P2RX4/  
ORO1A/CD7/CD44/CD74/BATF/CCDC88B/RELB/NCK2/FANCD2/ELF4/PRNP/SYK/IL18/PAG1/CD151  
/LGALS3/PLAUR/FABP5/TYROBP/CKAP4/PYGB/ITGAM/CYBB/GSTP1/CD44/ITGB2/ALDH3B1/SNAP2  
R/RAC2/CSF1/PDLIM7/S100A14/TGFB1/CMTM7/ENAH/GPNMB/CORO1A/EFNA3/GSTP1/STX3/ITGB2  
F385A/RPL8/RPS6KA1/YBX3/EIF5A2/CCL5/DPH2/CNOT11/MAPK3/EIF3B/RPL36A/MRPL17/NPM1/  
TYROBP/ECT2/TGFB1/ITGAM/PNMA1/GAPDH/RIPK2/SQSTM1/TNFRSF12A/YWHAZ/CDKN2A/ARHGEF2  
M/MICAL1/SRC/TIMP1/LGALS3/PLAUR/DAB2/AKR1B1/AURKA/PPT1/DKK1/RIPK2/ADA/CORO1A/GS  
TYROBP/ECT2/TGFB1/ITGAM/PNMA1/GAPDH/RIPK2/SQSTM1/TNFRSF12A/YWHAZ/CDKN2A/ARHGEF2  
M/MICAL1/SRC/TIMP1/LGALS3/PLAUR/DAB2/AKR1B1/AURKA/PPT1/DKK1/RIPK2/ADA/CORO1A/GS  
BCK1/PSMD14/FBXL19/PSMD2/RNF34/RNF19B/SHARPIN/GNA12/DDA1/HSP90AB1/NPLOC4/CSNK1E  
M1/SRC/RAC2/ATP13A2/MMP14/CLSTN1/ECT2/ARL2/TGFB1/RCC2/DKK1/PSRC1/CORO1A/GPC4/PM  
NCK2/BAIAP2L2/VASP/PLEK/HRAS/SYK/CDC42EP1/NUP62/HCK/SPAG5/MAPRE1/TWF2/ASAP1/COL  
2/FBLN1/TGFB1/LGALS1/GAPDH/TYMS/CDC25C/IRAK1/CD74/C1QA/ITGAV/SYK/NUP62/RCC1/HCK  
YRO3/SRC/CCNA2/FBLN1/TGFB1/LGALS1/GAPDH/TYMS/CDC25C/IRAK1/CD74/C1QA/ITGAV/SYK/N  
ASF1B/CDK1/LGALS9/CABYR/FOXJ1/TYRO3/CDC25B/B4GALNT1/SRC/TIMP1/ITGA3/LHFPL2/ETV5  
CDK1/NDC80/MCM2/CDC45/MELK/ANLN/NEK2/BUB1/DLGAP5/CDC25B/BUB1B/MCM4/CKS2/ORC6/CC  
LGALS9/PFN2/VEGFB/ANXA5/TMC6/MICAL1/TIMP1/LHFPL2/NCS1/LGALS3/PLAUR/RAC2/SYT13/F  
1/TYROBP/S100A14/TGFB1/ITGAM/CYBB/GAPDH/RIPK2/HAVCR2/CORO1A/C1QB/SUSD4/BIRC3/CD  
RKCD/RELB/SLAMF8/HRAS/SYK/HCK/S100A8/MUC1/IFNGR2/SCRIB/HMGB3/GRN/GPB5/CARD9/PSM  
A1/ITGA3/TSPO/CLIC1/SEMA6A/MMD/ETV5/DAB2/MMP14/LIF/SERPINE2/CSF1/TYROBP/PDLIM7/  
BUB1/BUB1B/ZWINT/LIF/CENPF/ORC1/CCNF/TTK/TGFB1/RAD51/AURKA/GPNMB/CDC25C/DTL/PRR  
CNE1/CCNA2/TRIB3/CSF1/ECT2/CCNF/TGFB1/IQGAP3/STK26/DKK1/RIPK2/UNC119/PSRC1/GSTP  
CMTM7/GPNMB/SPI1/LGALS1/RIPK2/ADA/EXO1/HAVCR2/CORO1A/MZB1/CLCF1/CD7/CD44/ITGB2/  
MYT1/NDC80/NCAPG/ANLN/NEK2/BUB1/DLGAP5/CDC25B/BUB1B/MKI67/PRC1/KIF23/ZWINT/CKS2  
/LIF/CSF1/TYROBP/TGFB1/CMTM7/SPI1/LGALS1/RIPK2/ADA/CLCF1/GPC3/C1QC/CD74/BATF/PK  
SAPCD2/CSF1/TGFB1/TXNRD1/DKK1/FOLR1/GPC4/KRT17/GPC3/FLNA/CD44/ROBO1/VASP/PGF/DD  
GAM/GPNMB/LGALS1/RIPK2/ADA/HAVCR2/CORO1A/MZB1/CLCF1/ITGB2/CD74/CCDC88B/PKN1/PTA  
AM/SRC/ITGA3/LGALS3/RAC2/MMP14/CSF1/PODXL2/S100A14/TGFB1/ITGAM/ADA/CORO1A/COL1A  
NEK2/STMN1/BUB1/BUB1B/SRC/ITGA3/TSPO/SEMA6A/LGALS3/MMP14/MELTF/LIF/CENPF/FBLN1/  
A5/EPCAM/PLXNA1/SRC/TIMP1/ITGA3/SEMA6A/LGALS3/SPINT2/RAC2/DAB2/MMP14/SERPINE2/A  
DAB2/MMP14/CSF1/S100A14/TGFB1/GPNMB/CORO1A/FLNA/CD74/PTAFR/FERMT3/ARHGEF2/P2RX4  
K2/CDC25B/SRC/MMD/CKS2/RAC2/CCNE1/CCNA2/RFC4/TRIB3/MAGEC2/CSF1/ECT2/CCNF/TGFB1/  
16/DEPDC1B/FBLN1/ECT2/RCC2/ARHGAP4/RIPK2/EFNA3/UHRF1/PPP1R14D/AGRN/RACGAP1/TAX1  
/RHOF/AURKA/PSRC1/CORO1A/SKA3/FLNA/CEP131/COTL1/ARHGEF2/PRKCD/NCK2/PLXNA3/BAIAP  
CS1/RAC2/DNM1/CENPF/KIFC1/SAPCD2/MISP/NUSAP1/AURKA/PSRC1/FOLR1/STX3/YWHAZ/CEP13  
PF/KIFC1/SAPCD2/MISP/NUSAP1/PSRC1/FOLR1/STX3/YWHAZ/SNAP25/CPLX2/ARHGEF2/LAT2/SY  
6A/MMD/ETV5/NCS1/LIF/CLSTN1/SERPINE2/CSF1/ECT2/TGFB1/ARHGAP4/LGALS1/DKK1/GPC4/C  
1/ECT2/TGFB1/DKK1/CLCF1/TNFRSF12A/FLNA/AGRN/ARHGEF2/P2RX4/ROBO1/SERPINI1/PLXNA3  
3/TSPO/SEMA6A/MMD/ETV5/NCS1/MELTF/LIF/SERPINE2/CSF1/FBLN1/TYROBP/ECT2/TGFB1/RCC  
16/NCS1/LYPD1/LGALS3/RAC2/ATP13A2/DAB2/CCNE1/DNM1/MMP14/LIF/SAPCD2/MISP/TYROBP/  
HST11/ANXA5/TYRO3/EPCAM/MICAL1/SRC/TIMP1/LGALS3/PLAUR/ATP13A2/DAB2/CSF1/AKR1B1/  
G1/DAB2/DNM1/CLSTN1/ITGAM/PPT1/CORO1A/FOLR1/STX3/YWHAZ/ANO9/FCHO1/ITGB2/AGRN/SN

/UHRF1/BIRC3/BLMH/DCAF13/NUP62/CDC25A/RUSC1/PJA1/MAD2L1/RNF24/RNF145/RANGAP1/PS  
P/CENPH/AURKA/CORO1A/BOP1/FLNA/TNNT1/CEP131/TUBG1/RACGAP1/CENPW/ARHGEF2/CCDC28B  
STX3/SQSTM1/YWHAZ/GPC3/FLNA/ITGB2/AGRN/SNAP25/KCNJ11/SLC7A11/TSPAN15/ADORA1/PRN  
N2A/CD74/PKN1/ARHGEF2/PRKCD/HSPB1/NCK2/SLC7A11/ABCD1/HRAS/SYK/PLCB1/NUP62/RAD51  
2/LOXL4/KIF18B/POF1B/ARL2/P3H4/ENAH/RHOV/PSRC1/CORO1A/MARCKS/COL1A2/KRT17/FLNA/  
LS3/SPINT2/RAC2/CLSTN1/SERPINE2/DSG2/PODXL2/TGFB1/ITGAM/GPNMB/LGALS1/RIPK2/ADA/  
PR2/PRKCD/NCK2/CCDC28B/HRAS/CDC42EP1/WDR34/MAPRE1/TUBB/FGD3/TWF2/ASAP1/EZR/DCDC  
A6A/NCS1/RAC2/RCC2/ARHGAP4/LGALS1/DKK1/TNFRSF12A/CD44/AGRN/SNAP25/PRKCD/ROBO1/S  
25B/BUB1B/CCNE1/CENPF/ORC1/TTK/TGFB1/RCC2/AURKA/GPNMB/HMMR/CDC25C/DTL/CEP131/CD  
/TOP2A/TRIP13/RRM2/E2F1/CDCA5/CEP55/CDC6/UBE2S/TUBA4A/NUF2/CDKN3/PKMYT1/CDK1/ND  
E2/CSF3R/HMGB3/PRMT1/PSMB9/TNFRSF18/PSMD14/HMGB2/JAK3/TCF3/CD86/TNFSF9/CD2/IL34  
F/SAPCD2/MISP/TYROBP/ECT2/TGFB1/ITGAM/GPC4/STX3/SQSTM1/YWHAZ/GPC3/FLNA/ITGB2/CE  
AM/PLXNA1/SRC/TIMP1/ITGA3/SEMA6A/LGALS3/SPINT2/RAC2/DAB2/MMP14/SERPINE2/CSF1/FB  
MP14/CSF1/S100A14/TGFB1/GPNMB/CORO1A/FLNA/CD74/PTAFR/FERMT3/ARHGEF2/P2RX4/HSPB1  
/NOL3/RBM3/YBX1/PABPC1/PUF60/WDR77/RNPS1/SNRPE/POLR2H/TXNL4A/NCBP2/SNRPF/LSM7/U  
/NOL3/RBM3/YBX1/PABPC1/PUF60/WDR77/RNPS1/SNRPE/POLR2H/TXNL4A/NCBP2/SNRPF/LSM7/U  
/NOL3/RBM3/YBX1/PABPC1/PUF60/WDR77/RNPS1/SNRPE/POLR2H/TXNL4A/NCBP2/SNRPF/LSM7/U  
C2/CYBB/ADA/AGTRAP/IRAK1/EIF4EBP1/HK2/SOD3/ADORA1/ARNT2/UCP2/PGF/ADAM15/ANKRD1/  
6/LGALS3/PLAUR/RAC2/FABP5/TYROBP/CKAP4/PYGB/ITGAM/CYBB/GSTP1/CD44/ITGB2/ALDH3B1  
/LGALS1/RIPK2/ADA/HAVCR2/CORO1A/MZB1/CLCF1/ITGB2/CD74/CCDC88B/PKN1/PTAFR/NCK2/F  
VCR2/BIRC3/ITGB2/IRAK1/CMTM3/PRKCD/LAT2/RELB/IGLL5/HLA-DRB1/PRNP/HRAS/SYK/HLA-D  
6/LSM4/HSPA8/UPF3B/POLR2G/ZC3H3/EFTUD2/PIIH/NOL3/RBM3/YBX1/PABPC1/PUF60/WDR77/R  
TF2/NUP210/RGS14/NPM1/UPF3B/LMNA/RRS1/LZTS2/NUP93/NXT1/FAM53B/NUP205/NUP37/RNPS  
2/CORO1A/CD44/ITGB2/IRAK1/CERCAM/CD74/CCDC88B/PTAFR/FERMT3/NCK2/PRNP/SYK/IL18/P  
/SQSTM1/CDKN2A/RACGAP1/TAX1BP3/CHML/ARHGEF2/CYTH4/ROBO1/TRIP10/RGS19/RAB42/HRAS  
DK4/TCOF1/IGF2BP3/ZNF385A/RAN/RPS6KA1/PSMB9/PSMD14/YBX3/EIF5A2/CCL5/MAPKAPK2/DP  
D51/AURKA/GPNMB/CDC25C/DTL/CDKN2A/GTSE1/EZH2/CDK4/MAD2L1/MUC1/CDKN2D/ZNF385A/AR  
BO1/SERPINI1/PLXNA3/NME1/ITPKA/EZH2/NME2/TWF2/ASAP1/ANKRD1/TRPV2/GRN/CRMP1/CFL1  
/FBLN1/P3H4/TGFB1/ITGAM/CTSV/COL1A2/COL9A2/CD44/ITGB2/AGRN/QSOX1/VCAN/COL4A5/IT  
SF1/S100A14/TGFB1/GPNMB/CORO1A/FLNA/CD74/PTAFR/FERMT3/ARHGEF2/P2RX4/HSPB1/ITGAV  
ARMIL1/EIF5A2/NCKAP5L/HSPA8/FZD1/MAP1S/MRPL17/SMARCA4/MRPS12/PELO/F2RL1/MRPL47/  
67/SRC/LIF/CENPF/RMI2/TTK/TGFB1/SPI1/PHF19/FEN1/SMG5/PIF1/CCT5/MAD2L1/DNMT1/MUC  
P1/COTL1/ARHGEF2/PRKCD/NCK2/BAIAP2L2/VASP/PLEK/SYK/CDC42EP1/HCK/MAPRE1/TMSB4X/T  
S3/PLAUR/RAC2/FABP5/TYROBP/CKAP4/PYGB/ITGAM/CYBB/CORO1A/GSTP1/CD44/ITGB2/ALDH3B  
R/FABP5/TYROBP/CKAP4/PYGB/ITGAM/CYBB/GSTP1/CD44/ITGB2/ALDH3B1/SNAP25/PTAFR/COTL  
CDK1/NDC80/MCM2/CDC45/MELK/ANLN/NEK2/BUB1/DLGAP5/CDC25B/BUB1B/MCM4/CKS2/ORC6/CC  
GFB1/RCC2/AURKA/PSRC1/CDC25C/DTL/FEN1/RACGAP1/EIF4EBP1/SMARCD3/PLCB1/NUP62/GTSE  
PD1/NUTF2/NUP210/RGS14/NPM1/UPF3B/LMNA/RRS1/LZTS2/NUP93/NXT1/FAM53B/NUP205/NUP3  
55/CDC6/UBE2S/NUF2/CDK1/NDC80/NCAPG/ANLN/VEGFB/NEK2/STMN1/BUB1/CDC25B/CDCA3/BUB  
GAP3/DKK1/RIPK2/PSRC1/GSTP1/CDC25C/GDF15/IRAK1/CDKN2A/S1PR2/CD74/PKN1/DUSP5/PRK  
OBP/TGFB1/ITGAM/GSTP1/TNFRSF12A/YWHAZ/CD44/CD74/ARHGEF2/BCL2A1/P2RX4/PRKCD/HSPB  
AP2L2/VASP/PLEK/TRIM54/CDC42EP1/COLGALT1/HCK/MAPRE1/TMSB4X/TWF2/MID1IP1/CFL1/S1  
P4/SNRPA/PSMD2/JMJD6/HSPA8/NPM1/POLR2G/ZC3H3/RBM3/YBX1/PABPC1/RNPS1/PSMB2/NELFE  
/YWHAZ/FLNA/ITGB2/CEP131/KCNJ11/PRKCD/B3GAT3/PRNP/HRAS/ABHD17C/NUP62/GTSE1/CCT5  
3/SQSTM1/FLNA/SNAP25/KCNJ11/TSPAN15/PRNP/HRAS/RAB31/PACS1/PKP3/EZR/BSG/SCRIB/RH  
MYT1/NDC80/NCAPG/ANLN/NEK2/BUB1/DLGAP5/CDC25B/BUB1B/MKI67/PRC1/KIF23/ZWINT/CKS2  
/HLA-DQA1/HCK/PAG1/HLA-DRA/MUC1/EZR/HLA-DQB1/VTCN1/CARD9/PSMB9/HLA-DPA1/WIPF3/R  
/MAPKAPK2/LIN28B/SLFN13/DHX34/PCBP4/MRT04/CNOT11/PSMD2/LSM4/HSPA8/RPL36A/DKC1/P  
/MRT04/CNOT11/PSMD2/LSM4/HSPA8/RPL36A/PPP2R1A/NPM1/UPF3B/POLR2G/YBX1/RPS2/PELO/  
TPM4/COTL1/ARHGEF2/PRKCD/NCK2/BAIAP2L2/VASP/PLEK/CDC42EP1/USH1C/HCK/ZYX/TMSB4X/  
NPF/CCNF/TTK/SPI1/CORO1A/ARHGEF2/PRKCD/VAT1/TRIM54/PIF1/MAPRE1/TMSB4X/TWF2/MAD2

OR01A/CD44/ITGB2/IRAK1/FXYD5/CD74/CCDC88B/PTAFR/FERMT3/PRKCD/NCK2/PRNP/SYK/IL18  
3/NME1/ITPKA/HRAS/CDC42EP1/EZH2/NME2/TWF2/ANKRD1/TRPV2/PLEK2/GRN/RHOQ/FSCN1/CAR  
/NCK2/PLXNA3/BAIAP2L2/VASP/PLEK/CDC42EP1/USH1C/HCK/TMSB4X/CDK4/TWF2/EZR/TRPV2/C  
/RRS1/DDX49/RRP9/POLR3K/ERI3/REX04/RRP1/RRP7A/PA2G4/FBL/USB1/DDX27/NOP2/GTPBP4/  
C2/CYBB/ADA/AGTRAP/IRAK1/EIF4EBP1/HK2/SOD3/ADORA1/ARNT2/UCP2/PGF/ADAM15/ANKRD1/  
HAVCR2/BIRC3/CD74/PTAFR/ITGAV/SYK/PLCB1/CSF1R/GRN/CFL1/APOBEC3C/TRIM6/CHMP4B/TR  
D74/CCDC88B/PTAFR/NCK2/IGLL5/PLEK/SYK/IL18/VTCN1/CD320/RPS6KA1/TFRC/HLA-DPA1/HL  
F1/RAD51AP1/CCT5/DNMT1/ALYREF/ANKRD1/CDC7/CHEK1/NPAS2/HSF1/NABP2/CCT6A/TFRC/CCT  
A/MZB1/CLCF1/CD74/CCDC88B/PKN1/NCK2/FANCD2/SLAMF8/IGLL5/PRNP/SYK/IL18/PAG1/HMGB  
OR01A/ZG16B/NCDN/CIB2/FEN1/SCGN/P2RX4/HSPB1/POLD1/SMG5/ACP5/ADORA1/SYK/USH1C/PI  
GFB1/STC2/CYBB/ADA/AGTRAP/IRAK1/EIF4EBP1/HK2/SOD3/ADORA1/ARNT2/UCP2/PGF/CDK4/AD  
X/SSR2/MTCL1/VPS37C/PKDCC/SEC61A1/ZDHHC7/RPL36A/MICALL1/PAK1/BMF/SLC51B/NPC1/RP  
25B/BUB1B/CCNE1/CENPF/ORC1/TTK/TGFB1/RCC2/AURKA/GPNMB/HMMR/CDC25C/DTL/CEP131/CD  
GEF2/BCL2A1/PRKCD/HSPB1/NCK2/ITGAV/S100A8/MAPK8IP2/MUC1/UNC5B/CDKN2D/ZNF385A/MA  
D74/CCDC88B/PTAFR/NCK2/IGLL5/SYK/IL18/VTCN1/CD320/TFRC/HLA-DPA1/HLA-DMB/JAK3/CC  
/DTL/RNASEH2A/MCM6/FEN1/DSCC1/GINS2/MCM10/POLD1/MCM7/HRAS/PIF1/MCM3/NAP1L1/ALYR  
B1/DLGAP5/BUB1B/MKI67/PRC1/KIF23/ZWINT/CCNE1/CENPF/KIFC1/RMI2/KIF18B/ECT2/NUSAP  
KA/GPNMB/CDC25C/CDKN2A/HRAS/GTSE1/EZH2/CDK4/MAD2L1/MUC1/EME1/CDKN2D/ZNF385A/ARI  
/FANCD2/PRNP/SYK/IL18/PAG1/TNFAIP8L2/VTCN1/TFRC/HLA-DPA1/HLA-DMB/TNFRSF18/VSIG4  
HCK/MAPRE1/TMSB4X/MX2/TWF2/MID1IP1/MICALL2/TRIM6/CARMIL1/PLEKHG2/CCL26/MAP2/ARP  
74/CCDC88B/PKN1/PRKCD/NCK2/ELF4/PRNP/SYK/IL18/CD151/VTCN1/CD320/TFRC/HLA-DPA1/H  
BL/DDX27/NOP2/AATF/NOC2L/GTPBP4/NHP2/POP7/RPSA/NLE1/RPL10L/EMG1/NOP58/RPS5/ZNF5  
/P2RX4/PRKCD/HSPB1/SLAMF8/NBL1/SYK/STK39/CKLF/PGF/TMSB4X/S100A8/CSF3R/TRPM2/RHO  
ZB1/CLCF1/CD74/CCDC88B/PKN1/PRKCD/NCK2/ELF4/PRNP/SYK/IL18/CSF1R/CD151/VTCN1/CD3  
/CD74/CCDC88B/PTAFR/NCK2/PRNP/SYK/IL18/PAG1/TNFAIP8L2/VTCN1/TFRC/HLA-DPA1/HLA-D  
TP1/ALDH3B1/SOD3/PRKCD/HSPB1/FANCD2/SLC7A11/ABCD1/EZH2/NME2/MPV17/NCF4/GSR/TRPM  
/RAD51AP1/C11orf80/ALYREF/EME1/CDC7/HMGB3/CHEK1/RHNO1/NABP2/MCM5/TFRC/PSMC3IP/A  
3C/KIF18A/KIF21B/DTNBP1/MAP2/FLOT2/SSNA1/HIF1A/HSPA8/MAP1S/CENPE/KLC3/TTL1/DYN  
25A24/NPM1/UPF3B/ZC3H3/RRS1/NUP93/NXT1/NUP205/NUP37/RNPS1/NDC1/NUP188/NCBP2/FLO  
1/ERI3/REX04/RRP1/RRP7A/PA2G4/FBL/DDX27/NOP2/GTPBP4/NHP2/POP7/EMG1/NOP58/UTP18/  
/NUP37/NDC1/POLR2H/NUP188/ZC3H12A/NCBP2/CNOT9/SCMH1/KCNQ1/HDAC2/CDK2/CHAC1/MEG  
N/KIF3C/NUP210/SSNA1/NPM1/UPF3B/TNFAIP2/DYNLRB1/IFT52/DYNLL1/RRS1/RELN/NUP93/NX  
B3/CD320/TFRC/JAK3/TCF3/BAX/MIF/CD300A/PRKDC/MAD2L2/IL27RA/TCIRG1/SASH3/TPD52/T  
/CEP131/TUBG1/SMARCD3/PLCB1/USH1C/GTSE1/MAPRE1/TUBB/CDC25A/CDK4/CDC7/TUBB4B/CHE  
8/VTCN1/CD320/TFRC/HLA-DPA1/HLA-DMB/JAK3/CCL5/CD86/VAV1/TNFSF9/MIF/FLOT2/ZP3/HL  
AS/S100A8/MUC1/CASP4/CDKN2D/ZNF385A/CREB3L1/DDIT3/TRAFF2/YBX3/HMOX1/BAX/MIF/CASP  
CD/ITGAV/IL15RA/IGLL5/ADORA1/RAB31/SYK/HCK/UNC13D/NCF4/RAB34/WIPF3/WASF2/VAV1/C  
385A/ARID3A/PRMT1/DDIT3/BAX/MIF/PCBP4/CASP2/RRAGD/CNOT11/RRAGC/BRCA1/PCNA/BIN1/  
A-DQA1/KIF11/TAP1/HLA-DRA/NCF4/HLA-DQB1/IFI30/RAB34/KIF3C/NCF1/KIF18A/PSMB9/HLA  
/RRP7A/SNRPE/TXNL4A/SNRPF/NOP2/EIF3D/RPSA/NLE1/SRSF9/SNRPC/GEMIN7/RPL10L/ATXN2L  
BP5/FSCN1/HNF1B/CARMIL1/RHOC/BAX/CCL26/MSN/ARPC4/LCP1/PAK1/BAIAP2L1/FCHSD1/BMF/  
N2A/MCM6/EIF4EBP1/MCM10/MCM7/PLCB1/MCM3/RCC1/GTSE1/EZH2/CDC25A/CDK4/MUC1/CDKN2D  
DC88B/PKN1/PRKCD/NCK2/ELF4/PRNP/SYK/IL18/CD151/VTCN1/CD320/TFRC/HLA-DPA1/HLA-DM  
BAX/MIF/PRDX1/FLVCR1/HIF1A/JMJD6/TCIRG1/SASH3/ISG15/STAT1/AMPD3/UBAP2L/NCAPG2/S  
HLA-DPA1/RBCK1/PSMD14/BAX/PHPT1/CD300A/HLA-DPB1/PSMD2/CD276/HLA-DQB2/CD3E/PAK1/  
C/RAD54L/TUBG1/NCAPH/FANCD2/PLCB1/CDC25A/C11orf80/ASPM/EME1/HSF1/KIF18A/PSMC3IP  
C1/ANKRD1/ZNF385A/ARID3A/CHEK1/RHNO1/PRMT1/BAX/MIF/PCBP4/CASP2/CNOT11/NUPR1/RNF  
A/CDC25C/DTL/FEN1/RACGAP1/SMARCD3/PLCB1/NUP62/GTSE1/SPAG5/EZH2/CDC25A/CDK4/MAD2  
DC80/NCAPG/ANLN/NEK2/BUB1/DLGAP5/BUB1B/MKI67/PRC1/KIF23/ZWINT/CENPF/KIFC1/KIF18  
1B/BAX/PTK7/PSMD2/FZD1/BASP1/MLLT3/STAT1/ARHGEF19/PSMB2/FGFR1/PSME3/DVL3/PLEKHA  
M6/EIF4EBP1/MCM10/MCM7/PLCB1/MCM3/RCC1/GTSE1/EZH2/CDC25A/CDK4/MUC1/CDKN2D/ZNF38

/CEP131/TUBG1/SMARCD3/PLCB1/USH1C/MAPRE1/TUBB/CDC25A/CDK4/CDC7/TUBB4B/PSMB9/PSM  
FRC/IL34/TCIRG1/ATP6AP1/UBASH3B/F2RL1/TNFRSF11A/PIR/FSTL3/BATF2/TFE3/LEF1/IRF7/  
MSB4X/TWF2/CFL1/MICALL2/CARMIL1/PLEKHG2/CCL26/ARPC4/BAIAP2L1/FCHSD1/BIN1/COR07/  
RPL17/RPLP2/EIF3D/RPSA/TRIM31/SSB/RPS5/NELFB/RPS21/RPL7/RPL28/CCL4/NUP85/DENR/N  
/IL18/VTCN1/TFRC/HLA-DPA1/HLA-DMB/JAK3/CCL5/CD86/VAV1/TNFSF9/FLOT2/ZP3/HLA-DPB1  
/NUP205/NUP37/RNPS1/NDC1/NUP188/NCBP2/FLOT1/U2AF2/SRSF9/XPOT/SSB/ZNF593/AKAP8L/  
/NUP205/NUP37/RNPS1/NDC1/NUP188/NCBP2/FLOT1/U2AF2/SRSF9/XPOT/SSB/ZNF593/AKAP8L/  
KN1/NCK2/PRNP/SYK/IL18/VTCN1/CD320/TFRC/HLA-DPA1/HLA-DMB/VSIG4/JAK3/CCL5/CD86/T  
RAD51/NCAPD2/RAD54L/CDKN2A/MCM6/CENPW/DSCC1/NCAPH/GINS2/OIP5/MCM7/PIF1/MCM3/NAP  
BRIX1/RRP7A/SNRPE/TXNL4A/SNRPF/NOP2/EIF3D/RPSA/NLE1/SRSF9/SNRPC/GEMIN7/RPL10L/A  
B1B/PRC1/KIF23/ZWINT/CCNE1/CENPF/KIFC1/RMI2/KIF18B/ECT2/NUSAP1/P3H4/TTK/RCC2/PS  
HCK/TMSB4X/TWF2/CFL1/S100A10/CARMIL1/WASF2/RHOC/PLEKHG2/CCL26/ARPC4/SH3PXD2B/SL  
2A/GTSE1/EZH2/CDK4/MAD2L1/MUC1/CDKN2D/ZNF385A/ARID3A/CHEK1/PRMT1/PSMB9/PSMD14/B  
N2D/IFT57/RPS6KA1/HSF1/CARD9/PSMB9/TRAF2/BAX/BEX3/TNFAIP8/RNF34/PERP/BCL2L12/NO  
76/PRKDC/MAD2L2/SPRED1/BRCA1/PCNA/BCL2L12/PARPBP/DDIAS/DDX11/BID/OTUB1/FBX05/AU  
KC1/NPM1/UPF3B/ZC3H3/CCT2/RRS1/NUP93/NXT1/NUP205/NUP37/RNPS1/NDC1/NUP188/FBL/NC  
LOT2/MTCL1/MSN/BSK1/PTK7/SLC9A1/PAK1/PDZD11/RHOF/LMNA/HSP90AB1/SPDL1/MARK2/SFR  
88B/PKN1/NCK2/PRNP/SYK/IL18/VTCN1/CD320/TFRC/HLA-DPA1/HLA-DMB/VSIG4/JAK3/CCL5/C  
-DMB/JAK3/CCL5/CD86/VAV1/TNFSF9/FLOT2/ZP3/HLA-DPB1/EBI3/CD276/EFNB1/CD3E/PAK1/S  
TSE1/EZH2/CDK4/MAD2L1/MUC1/CDKN2D/ZNF385A/ARID3A/PRMT1/PSMB9/PSMD14/BAX/LCMT1/P  
/IL18/VTCN1/TFRC/HLA-DPA1/HLA-DMB/JAK3/CCL5/CD86/VAV1/TNFSF9/FLOT2/ZP3/HLA-DPB1  
KA/CDC25C/DTL/HRAS/GTSE1/MAD2L1/MUC1/EME1/ZNF385A/ARID3A/CHEK1/RHNO1/NABP2/PRMT  
PLP2/CNOT9/LSM7/RPSA/SSB/RPS5/RPS21/RPL7/RPL28/LSM2/RPL39/EDC3/RPL35A/EIF4A3/EX  
TPBP4/NHP2/POP7/EMG1/NOP58/UTP18/RPS21/UTP14A/RPL7/NPM3/TRMT112/NSUN5/MPHOSPH6/  
DCL3/CCT2/HSP90AB1/FKBP9/UNC45A/PPIA/CCT4/HSPBP1/MKKS/HSPH1/CCT7/FKBP4/GNB2/PPI  
L17/RPLP2/TRAM1L1/RPSA/ITGB1BP1/RPS5/CDK5/ZDHHC18/RPS21/RPL7/RPL28/ZDHHC1/RPL39  
MSB4X/TWF2/CARMIL1/PLEKHG2/CCL26/MAP2/ARPC4/PAK1/BAIAP2L1/FCHSD1/BIN1/ARPC2/ARP  
PS6KA1/HSF1/CARD9/TRAF2/BAX/BEX3/TNFAIP8/RNF34/BCL2L12/NOL3/LEF1/HIP1R/BID/MT3/  
/SLPI/FUCA2/ISG15/CHMP4C/POLR2G/SMARCA4/PPIH/TRIM59/F2RL1/STAT1/PABPC1/HDAC1/LE  
9A1/PSMD2/HIF1A/GNGT1/NOL3/LMNA/S100B/HYOU1/PSMB2/PPARD/PSME3/MT3/NPEPPS/ADAM8/  
1L1/CENPO/CENPU/SOX12/MCM5/SMARCD1/HNF1B/CENPL/HMGB2/GMNN/RUVBL1/VPS72/CENPE/TA  
1/SYK/PLCB1/CKLF/PGF/S100A8/CSF3R/CCL5/VAV1/CCL26/MIF/CD300A/CREB3/MAPK3/SERP IN  
PRE1/TUBB/CDC25A/CDK4/CDC7/TUBB4B/CHEK1/PSMB9/PSMD14/BSK1/MIIP/SSNA1/PSMD2/PPP  
B1B/PRC1/KIF23/ZWINT/CENPF/KIFC1/RMI2/KIF18B/NUSAP1/TTK/PSRC1/NCAPD2/TUBG1/FEN1  
SF1/NABP2/MCM5/AP5Z1/PSMD14/SIRT6/GINS4/PRKDC/MAD2L2/RBBP8/BRCA1/NSMCE2/XRCC2/X  
PO6/NUP188/CSE1L/NCBP2/U2AF2/SRSF9/XPOT/SSB/ZNF593/AKAP8L/IL1B/CDK5/TXN/CPSF1/T  
UBB/CDC25A/CDK4/CDC7/TUBB4B/PSMB9/PSMD14/BSK1/MIIP/SSNA1/PSMD2/PPP2R1A/CHMP4C/  
/BAX/BEX3/MAPK3/PERP/PRELID1/HIP1R/PSME3/BID/BCAP31/PRR7/BBC3/PMAIP1/LYN/ADRM1/  
K/STK39/CKLF/PGF/S100A8/CSF3R/TRPM2/CCL5/SLC12A2/VAV1/CXCR4/CCL26/MIF/CREB3/MAP  
1/RASSF7/KIF18A/CHMP4B/MAP2/EFNA5/STIL/MAP1S/PAK1/NPM1/CHMP4C/BRCA1/DYNC1H1/XRC  
/PHPT1/CD300A/HLA-DPB1/PSMD2/CD276/HLA-DQB2/CD3E/PAK1/THY1/THEMIS2/CTLA4/PSMB2/  
NDC1/XPO6/NUP188/CSE1L/NCBP2/U2AF2/SRSF9/XPOT/SSB/ZNF593/AKAP8L/IL1B/CDK5/TXN/C  
/NUP205/NUP37/RNPS1/NDC1/NUP188/NCBP2/FLOT1/U2AF2/SRSF9/XPOT/SSB/ZNF593/AKAP8L/  
RE1/CFL1/S100A10/CARMIL1/RHOC/CCL26/ARPC4/SH3PXD2B/PAK1/BAIAP2L1/FCHSD1/BIN1/F2  
M1/POLR2G/YBX1/PABPC1/PSMB2/ZC3H12A/PSME3/SLC11A1/PSMB4/PSMB8/PSMB10/PSMA5/PSMD  
TGAX/FZD1/MLLT3/STAT1/ARHGEF19/PSMB2/FGFR1/PSME3/DVL3/PLEKHA4/SIX2/FZD2/RAC1/PS  
F4/RPS5/RPS21/RPL7/EIF3I/RPL28/EIF2S3/DENR/RPL39/RPL35A/CDC123/RPS3/RPL27/EIF3H  
FLNA/SPC25/TUBG1/RACGAP1/CENPW/KIF11/NUP62/RCC1/SPAG5/MAPRE1/TUBB/ASPM/EZR/RAN/

1/TAP1/HLA-DRA/NCF4/HLA-DQB1/IFI30/KIF3C/NCF1/KIF18A/PSMB9/HLA-DPA1/HLA-DMB/PSM  
C/CCT3/TRIM28/CACYBP/BAX/SIRT6/PRKDC/MAD2L2/CHTF18/MAPK3/DKC1/ACD/FGFR4/BRCA1/P

CHMP4C/RBL1/YBX1/MYO19/TGFA/E2F8/INCENP/LBH/BLM/EVI2B/KIF14/ITGB1BP1/RAB11FIP4/  
1/RASSF7/KIF18A/CHMP4B/MAP2/EFNA5/STIL/MAP1S/PAK1/NPM1/CHMP4C/BRCA1/DYNC1H1/XRC  
4/CCDC88B/PKN1/NCK2/PRNP/SYK/IL18/VTGN1/CD320/TFRC/HLA-DPA1/HLA-DMB/VSIG4/JAK3/  
A/NCF4/HLA-DQB1/IFI30/KIF3C/NCF1/KIF18A/PSMB9/HLA-DPA1/HLA-DMB/PSMD14/HLA-DPB1/  
/PAK1/CRABP2/NRCAM/SLC12A8/HSP90AB1/GDI1/E2F4/SLC9A3R1/MT3/RAP1GAP2/KDM1A/RAC1/  
T14/LAMA5/IFT52/DVL3/JAG2/FZD2/WNT7B/TULP3/DEAF1/TGFB2/FGFR2/DVL2/PFN1/RALA/PAX  
A/NCF4/HLA-DQB1/IFI30/KIF3C/NCF1/KIF18A/PSMB9/HLA-DPA1/HLA-DMB/PSMD14/HLA-DPB1/  
A1/PPP2R1A/STX1A/TUBA1A/STX6/RAB3B/SFI1/DYNLL1/DYNC1H1/CSNK1E/STX10/CEP89/HAUS1  
L1/PLEKHG2/CCL26/ARPC4/BAIAP2L1/FCHSD1/BIN1/COR07/ARPC2/GAS7/ARPC3/COR01B/HIP1R  
8/MAP1S/KLC3/TUBA1A/DYNLRB1/IFT52/DYNLL1/DYNC1H1/MYO19/BLOC1S4/CLN3/SFPQ/AP3M2/  
FL1/CARMIL1/PLEKHG2/CCL26/ARPC4/BAIAP2L1/FCHSD1/BIN1/F2RL1/ARPC2/ARPC3/COR01B/H  
ARPC3/WIPF1/PSMB2/PSME3/ACTG1/NCKAP1L/MYO1G/SHC1/LYN/CARD11/RAC1/PSMB4/ACTB/CD4  
1/VTGN1/TFRC/HLA-DPA1/HLA-DMB/VSIG4/JAK3/CCL5/BAX/CD86/TNFSF9/MSN/ZP3/HLA-DPB1/  
1/PABPC1/PSMB2/ZC3H12A/PSME3/SLC11A1/PSMB4/PSMB8/PSMB10/PSMA5/PSMD13/PSMC4/SET/  
RIM6/CCL5/CXCR4/HIF1A/SHARPIN/NOL3/SOCS1/IRF3/HSP90AB1/F2RL1/STAT1/IRF7/CPNE1/N  
P8/SPRED1/BRCA1/BCL2L12/RRS1/HDAC1/DYRK2/RFC2/BLM/NOP2/NOC2L/HDAC2/CDK2/KDM1A/P  
ACD/BRCA1/NSMCE2/CCT2/LMNA/DDX11/NELFE/RPS6KA4/CCT4/PNKP/KDM1A/CCT7/AKAP8L/IL1B  
1/NBL1/PLCB1/STK39/PGF/TNFRSF18/HMOX1/BDKRB1/CCL5/MIF/CD300A/MSN/ZP3/CREB3/MAPK  
A/HSP90AB1/DDX11/HYOU1/ARFGAP1/UBE2J2/EXTL3/HSPA4/CCL2/SHC1/ATF4/HSPH1/WFS1/DNA  
FL1/CARMIL1/PLEKHG2/CCL26/ARPC4/BAIAP2L1/FCHSD1/BIN1/F2RL1/ARPC2/ARPC3/COR01B/H  
RPLP2/RPSA/TRIM31/RPS5/NELFB/RPS21/RPL7/RPL28/CCL4/NUP85/NUP43/RPL39/RPL35A/SMA  
AM53B/PSMB2/PSME3/PLEKHA4/DAPK3/CSNK1D/AXIN1/NLE1/GPRC5B/PSMB4/PSMB8/PSMB10/PSM  
4B/CCL5/MIF/ZP3/MAPK3/TRIM11/CHMP4C/POLR2G/SMARCA4/PPIH/F2RL1/PABPC1/LY86/LEF1/  
U/SOX12/MCM5/HNF1B/CENPL/HMGB2/GMNN/RUVBL1/CENPE/TAF6/NPM1/CHAF1A/SMARCA4/ITGB3  
F18/MAPK3/DKC1/ACD/ISG15/FGFR4/PCNA/CCT2/HSP90AB1/NPLOC4/RFC2/PPIA/CCT4/PNKP/NH  
1A/TUBA1A/STX6/RAB3B/SFI1/DYNLL1/DYNC1H1/CSNK1E/STX10/CEP89/HAUS1/TUBB4A/CSNK1D  
APH/FANCD2/PLCB1/CDC25A/C11orf80/ASPM/EME1/HSF1/KIF18A/PSMC3IP/ESPL1/SGO2/MND1/  
X/CASP2/NUPR1/PPP2R1A/PEA15/BMF/PPP1CA/HIP1R/SLC9A3R1/BID/BCAP31/PRR7/DAPK3/YWH  
VPS72/CHD3/PAK1/NPM1/SMARCA4/ACTL6A/HDAC1/CBX3/SCMH1/ITGB3BP/HDAC2/NASP/CHRA1/  
C1/ACD/NSMCE2/PCNA/CCT2/HSP90AB1/XRCC3/RFC2/CCT4/PNKP/BLM/NHP2/CCT7/PRIM1/TCP1/  
PSMD2/EDA/NOL3/PSMB2/ZC3H12A/PSME3/BCL3/CPNE1/PSMB4/IL1B/PSMB8/PSMB10/PSMA5/PSM  
PC1/PSMB2/ZC3H12A/PSME3/SLC11A1/PSMB4/PSMB8/PSMB10/PSMA5/PSMD13/PSMC4/SET/PSMD1  
1/PRNP/HRAS/GPC1/EZR/RHOG/ANXA13/RHOQ/MTCL1/PKDC/PAK1/SLC51B/CNPY4/GDI1/BID/RA  
/CFL1/GIPC1/CHMP4B/RHOC/ESPL1/CHMP4C/MYO19/E2F8/LZTS2/INCENP/RAB35/RTKN/KIF14/R  
D1/MCM7/MCM3/ALYREF/EME1/CDC7/GINS3/MCM5/POLA2/GMNN/GINS4/CHTF18/PCNA/TICRR/E2F  
USAP1/TTK/TGFB1/AURKA/CDC25C/KIF11/NUP62/RCC1/MAD2L1/CHEK1/CHMP4B/ESPL1/LCMT1/N  
ELID1/HIP1R/PSME3/BID/BCAP31/PRR7/BBC3/PMAIP1/LYN/ADRM1/F3/LCK/IFI16/CASP1/PML/  
/SHARPIN/TNFRSF4/EDA/NOL3/F2RL1/STAT1/TNFRSF11A/PSMB2/KRT18/PSME3/CPNE1/KRT8/PS  
A/CANT1/UBE2I/SHARPIN/EDA/SECTM1/IRF3/F2RL1/S100B/PIM2/TGM2/EEF1D/TNIP2/SLC35B2  
CD3/PLCB1/NUP62/CDC25A/CDK4/MAD2L1/CDC7/HSF1/ESPL1/NSMCE2/XRCC3/TGFA/FGFR1/FBXO  
RNPS1/NDC1/NUP188/NCBP2/U2AF2/SRSF9/AKAP8L/CPSF1/THOC5/NUP85/NUP43/AGFG1/THOC6/  
PF/NUSAP1/TTK/TGFB1/AURKA/CDC25C/PLCB1/KIF11/NUP62/RCC1/MAD2L1/CHEK1/CHMP4B/ESP  
RMT1/BAX/PCBP4/CASP2/PRKDC/CNOT11/RBL1/PCNA/CTDSPL/E2F8/PRMT2/E2F4/PSME3/BID/CN  
C1/KIF23/ZWINT/CENPF/KIFC1/KIF18B/NUSAP1/TTK/PSRC1/NCAPD2/TUBG1/RACGAP1/DSCC1/N  
C1/ACD/NSMCE2/PCNA/CCT2/HSP90AB1/XRCC3/RFC2/CCT4/PNKP/BLM/NHP2/CCT7/PRIM1/TCP1/  
MB2/PSME3/SLC9A3R1/DVL3/PLEKHA4/FZD2/RAC1/PSMB4/VANGL1/PSMB8/PSMB10/PSMA5/PSMD1  
RIM6/CCL5/CXCR4/HIF1A/SHARPIN/NOL3/SOCS1/IRF3/HSP90AB1/F2RL1/STAT1/IRF7/CPNE1/N  
G2/CCL26/ARPC4/BAIAP2L1/FCHSD1/BIN1/ARPC2/ARPC3/COR01B/HIP1R/NCKAP1L/CAPZA1/MKK  
RMT1/BAX/PCBP4/CASP2/BRSK1/WDR76/PRKDC/CNOT11/PEA15/BRCA1/PCNA/TICRR/E2F8/E2F4/  
SME3/DVL3/PLEKHA4/CSNK1D/FZD2/RAC1/PSMB4/VANGL1/PSMB8/PSMB10/GNB1/PSMA5/PSMD13/  
C/HLA-DPA1/HLA-DMB/VSIG4/JAK3/CCL5/CD86/TNFSF9/ZP3/HLA-DPB1/EBI3/CD276/EFNB1/CD

RMT1/BAX/FAM83D/PCBP4/CASP2/PRKDC/CNOT11/RBL1/PCNA/CTDSPL/E2F8/PRMT2/E2F4/PSME3  
3/BAX/MIF/CREB3/HIF1A/NUPR1/BCL2L12/BMF/NOL3/HDAC1/DDIAS/HYOU1/SLC9A3R1/BID/BCA  
25C/HRAS/GTSE1/MAD2L1/MUC1/EME1/ZNF385A/ARID3A/NABP2/PRMT1/BAX/LCMT1/PCBP4/CASP  
orf80/ASPM/EME1/HSF1/KIF18A/PSMC3IP/ESPL1/SGO2/MND1/PPP2R1A/SGO1/NDC1/FBXO5/SMC  
LST8/HDAC2/HSPH1/LYN/FKBP4/CHORDC1/NUP85/NUP43/MYOF/RAE1/BAG3/NUP155/HSF2/HSBP1  
/CCL5/CD86/TNFSF9/MIF/ZP3/HLA-DPB1/EBI3/CD276/EFNB1/CD3E/SASH3/TNFRSF4/SLC39A10  
PA4/YWHAH/BBC3/PMAIP1/UBE2L3/GSK3A/YWHAQ/YWHAB/BAG3/GRPEL2/HK1/GZMB/DNM1L/TIMM4  
WDR76/PRKDC/CNOT11/PEA15/BRCA1/PCNA/E2F8/E2F4/BLM/CNOT9/CDK2/THOC5/PML/DONSON/T  
/JAK3/CCL5/CD86/TNFSF9/MIF/ZP3/HLA-DPB1/EBI3/CD276/EFNB1/CD3E/SASH3/TNFRSF4/SLC  
1/PRMT1/BAX/MIF/PCBP4/CASP2/PRKDC/MAD2L2/CNOT11/SPRED1/BRCA1/PCNA/E2F8/E2F4/BID  
K3/SERPINE1/ZNF580/C3AR1/F2RL1/FGFR1/NCKAP1L/CXCL13/RAC1/ITGA2/PLA2G7/CCL4/GPSM  
SB/ZNF593/AKAP8L/CPSF1/THOC5/NUP85/NUP43/AGFG1/THOC6/RAE1/EIF4A3/NUP155/CPSF4/N  
T52/DVL3/FZD2/TULP3/DEAF1/TGFB2/FGFR2/DVL2/PFN1/RALA/PAX8/KAT2A/TRIM71/WNT4/MED  
VAV1/CCL26/CD300A/MAPK3/JAML/C3AR1/CCL13/PIP5K1C/NCKAP1L/ADAM8/CCL2/PIK3CD/CXCL  
AP1/TTK/AURKA/PSRC1/FLNA/SPC25/TUBG1/RACGAP1/ARHGEF2/KIF11/NUP62/RCC1/MAD2L1/RA  
T52/DVL3/FZD2/TULP3/DEAF1/TGFB2/DVL2/PFN1/RALA/PAX8/KAT2A/TRIM71/WNT4/MED12/OVO  
SB/ZNF593/AKAP8L/CPSF1/THOC5/NUP85/NUP43/AGFG1/THOC6/RAE1/CPSF6/EIF4A3/XPO5/NUP  
/JAK3/CCL5/CD86/TNFSF9/MIF/ZP3/HLA-DPB1/EBI3/CD276/EFNB1/CD3E/SASH3/TNFRSF4/SLC  
/RAB10/RPL39/RPL35A/RPS3/RPL27/SSR3/RPL35/RPS20/RPL18A/PPP1R15A/RPS19/RPLP0/RPL  
SB/ZNF593/AKAP8L/CPSF1/THOC5/NUP85/NUP43/AGFG1/THOC6/RAE1/EIF4A3/NUP155/CPSF4/N  
PA4/YWHAH/BBC3/PMAIP1/UBE2L3/GSK3A/YWHAQ/YWHAB/BAG3/GRPEL2/HK1/GZMB/TIMM44/PDCD  
LCMT1/NAA10/MAD2L2/ACD/BRCA1/SPDL1/XRCC3/OTUB1/FBXO5/NOC2L/KDM1A/ATAD2/DYNC1LI1  
EKHA4/FZD2/RAC1/PSMB4/VANGL1/PSMB8/PSMB10/PSMA5/PSMD13/PSMC4/AP2M1/DVL2/PFN1/AP  
18/BDKRB1/CCL5/ZP3/CREB3/MAPK3/SERPINE1/ZNF580/THY1/C3AR1/F2RL1/NCKAP1L/ADAM8/C  
EKHA4/FZD2/RAC1/PSMB4/VANGL1/PSMB8/PSMB10/PSMA5/PSMD13/PSMC4/AP2M1/DVL2/PFN1/AP  
MD14/SIRT6/GINS4/MAD2L2/RBBP8/BRCA1/NSMCE2/XRCC2/XRCC3/PARPBP/BLM/AUNIP/KDM1A/W  
1/MARK2/SLC9A3R1/DYNLT1/GPSM2/FERMT1/FAM89B/RAB10/CYP26B1/MAP4/SNX27/SIPA1L3/LL  
5/NAP1L1/CENPO/CENPU/CENPL/HMGB2/SIRT6/NAA10/RUVBL1/NPM1/CHAF1A/NCAPG2/NOC2L/IT  
IRT6/GINS4/MAD2L2/RBBP8/BRCA1/NSMCE2/XRCC2/XRCC3/PARPBP/BLM/AUNIP/KDM1A/WAS/SWI  
4/PSMB4/PSMB8/PSMB10/PSMA5/PSMD13/PSMC4/PSMD10/PSMD11/GCN1/PSMD1/PSMA7/PSMB3/BA  
EIF4A3/RPS3/RPL27/RPL35/RPS20/RPL18A/RPS19/RPLP0/RPL18/RPL23/RPL38/RPL23A/GSPT2  
PSMB10/PSMA5/PSMD13/PSMC4/PSMD10/PSMD11/GCN1/PSMD1/PSMA7/PSMB3/BAG3/HSF2/PSMD4/  
L26/MAPK3/JAML/C3AR1/CCL13/PIP5K1C/NCKAP1L/CCL2/PIK3CD/CXCL9/CXCL3/CXCL13/RAC1/  
L1/CHTF18/CHD3/ERCC6L/RFC2/DDX11/BLM/PARP1/CHD4/RUVBL2/MCM8/CETN2/XRCC6/POLQ/RB  
SASH3/TNFRSF4/SLC39A10/MNDA/CTLA4/TNIP2/NCKAP1L/LYN/CARD11/NFAM1/TNFSF13B/PTPN6  
ML/C3AR1/CCL13/PIP5K1C/NCKAP1L/ADAM8/CCL2/PIK3CD/CXCL9/CXCL3/CXCL13/RAC1/IL1B/C  
XA13/RHOQ/EPB41L2/PKDCC/CNPY4/GPSM2/RANGRF/ACTB/CDK5/VIL1/AP2M1/STAC3/ACSL3/PRK  
UP85/NUP43/AGFG1/THOC6/RAE1/EIF4A3/NUP155/CPSF4/NUP107/SLBP/CHTOP/SEC13/SYMPK/C  
/FBXO5/TUBB4A/RANGRF/CSNK1D/CAMSAP2/FKBP4/RAC1/STMN3/INPP5J/TUBG2/KIF2A/RPS3/ZN  
UP85/NUP43/AGFG1/THOC6/RAE1/EIF4A3/NUP155/CPSF4/NUP107/SLBP/CHTOP/SEC13/SYMPK/C  
R3/RPL35/RPS20/RPL18A/RPS19/RPLP0/RPL18/SGTB/RPL23/RPL38/RPL23A/RPS7/RPL7A/RPS2  
RAC1/PSMB4/VANGL1/PSMB8/PSMB10/PSMA5/PSMD13/PSMC4/AP2M1/DVL2/PFN1/AP2S1/PSMD10/  
/PSMB10/PSMA5/NRAS/PSMD13/PSMC4/MUC5B/PSMD10/PSMD11/PSMD1/PSMA7/PSMB3/MUC20/PSM  
SIRT6/RUVBL1/MAP1S/CHD3/NPM1/CHAF1A/SMARCA4/NOC2L/ITGB3BP/NASP/MTA2/CENPI/CENPK  
VPS72/NPM1/CHAF1A/SMARCA4/ITGB3BP/NASP/CENPI/CENPK/NAP1L4/NAP1L2/SET/SMARCB1/SM  
KDC/CNOT11/RBL1/PCNA/CTDSPL/E2F8/PRMT2/E2F4/CNOT9/CDKN2B/CCL2/CDK2/PML/CDKN2C/R  
/GTPBP4/CDK2/EHMT2/RAC1/DONSON/TIPIN/TIMELESS/DBF4B/ESCO2/DNA2/CHEK2/NBN/GLI1/S  
FLNA/SPC25/TUBG1/RACGAP1/KIF11/NUP62/RCC1/RAN/CHMP4B/STIL/CENPE/CHMP4C/MSTO1/DY  
/PCBP4/CASP2/CNOT11/SPRED1/BRCA1/PCNA/E2F8/E2F4/BCL3/CNOT9/CDK2/KDM1A/PMAIP1/KM  
/PSMB10/PSMA5/NRAS/PSMD13/PSMC4/MUC5B/PSMD10/PSMD11/PSMD1/PSMA7/PSMB3/MUC20/PSM  
35/RPS20/RPL18A/RPS19/RPLP0/RPL18/SGTB/RPL23/RPL38/RPL23A/RPS7/RPL7A/RPS23/RPS1

MB4/VANGL1/PSMB8/PSMB10/PSMA5/PSMD13/PSMC4/AP2M1/DVL2/PFN1/AP2S1/PSMD10/PSMD11/  
1/PCNA/BIN1/HSP90AB1/E2F8/E2F4/CNOT9/EVI2B/CDK2/CDK5/PML/ZBTB17/TFAP4/CALR/MED2  
I30/KIF3C/KIF18A/HLA-DPA1/HLA-DMB/HLA-DPB1/CLTA/HLA-DQB2/CENPE/DYNLL1/DYNC1H1/L  
A1/VAV1/ITGA5/ITGAX/CD63/ISG15/LAMA5/THY1/ITGB5/FERMT1/ITGB1BP1/ITGA2/BCAR1/CD4  
1/CCL13/PIP5K1C/NCKAP1L/CCL2/PIK3CD/CXCL9/CXCL3/CXCL13/RAC1/IL1B/CCL4/TGFB2/C5A  
/CNOT11/PCNA/TICRR/E2F8/E2F4/BLM/CNOT9/CDK2/PML/DONSON/TIPIN/MSH2/TOPBP1/RFWD3/  
PM/SAC3D1/CHMP4B/CHMP4C/MSTO1/DYNC1H1/LZTS2/GPSM2/HAUS1/FBXO5/CSNK1D/KPNB1/HAUS  
/RCC2/FEN1/RACGAP1/SPAG5/MAD2L1/ESPL1/LCMT1/NAA10/MAD2L2/CENPE/NSMCE2/DYNC1H1/S  
KDC/CNOT11/RBL1/PCNA/CTDSPL/E2F8/PRMT2/E2F4/CNOT9/CDKN2B/CCL2/CDK2/PML/CDKN2C/R  
I30/KIF3C/KIF18A/HLA-DPA1/HLA-DMB/HLA-DPB1/CLTA/HLA-DQB2/CENPE/DYNLL1/DYNC1H1/L  
RPL18A/RPS19/RPLP0/RPL18/RPL23/RPL38/RPL23A/RPS7/RPL7A/RPS23/RPS10/RPS15/RPS16/  
AF1/TGFB2/DVL2/PFN1/RALA/KAT2A/TRIM71/MED12/OVOL2/LUZP1/RARG/ABL1/SFRP2/RPS7/IF  
18A/HLA-DPA1/HLA-DMB/HLA-DPB1/CLTA/HLA-DQB2/CENPE/DYNLL1/DYNC1H1/LAG3/HLA-DQA2/  
44/PDCD5/TOMM40L/TIMM50/ROMO1/HSPD1/TIMM13/MFF/HSP90AA1/SH3GLB1/TOMM22/BNIP3L/S  
/PSMB10/PSMA5/PSMD13/PSMC4/PSMD10/PSMD11/PSMD1/DONSON/PSMA7/PSMB3/TOPBP1/PSMD4/  
/CCNO/BLM/GTPBP4/CDKN2B/CDKN1C/ACTB/PSMD10/CDKN2C/CDK7/CCND2/TFAP4  
EIF3H/RPL18A/RPLP0/RPL18/DPH7/RPL38/DRG1/MCTS1/GSPT2/RPS23/EIF3K/EIF3M/RPL6/RPL  
SMB10/PSMA5/PSMD13/PSMC4/PSMD10/PSMD11/PSMD1/HLA-B/PSMA7/PSMB3/CALR/PSMD4/PSMD3  
A/RPS19/RPLP0/RPL18/RPL23/RPL38/RPL23A/RPS7/RPL7A/RPS23/RPS10/RPS15/RPS16/RPL5/  
ORO1B/HIP1R/NCKAP1L/ARPC5L/CTTN/WAS/VIL1/PFN1/WASF1/GRB2/CDC42EP2/GMFG/ABI2/ARP  
1/TUBB4A/CSNK1D/DCTN2/B9D2/HAUS8/PLK4/ODF2/CETN2/CEP250/HAUS6/NDE1/CKAP5/IQCB1/  
/GTPBP4/CDKN2B/CDKN1C/ACTB/PSMD10/CDKN2C/CDK7/CCND2/TFAP4  
/HLA-DPB1/EBI3/CD276/EFNB1/CD3E/SASH3/NCKAP1L/CD209/CARD11/IL1B/IL2RA/TNFSF13B/  
AC1/IL1B/BCAR1/MAPK11/MYOF/CADM4/PRKD2/CDC42/AXL/PDCD6/EMILIN1/BRK1/MAPKAPK3/HS  
/GRB2/CDC42/VPS25/APP/ADRA2A/CBL/ARAP1/PTPN12/PTPN2/ADAM17/IFI6/LGMN/HBEGF/RBPJ  
AM83D/NPM1/NSMCE2/FBXO5/LSM10/ANAPC11/CCND2/APP/MTBP/CUL4B/DBF4B/RAD51C/HSPA2/M  
L/LYN/CARD11/TNFSF13B/CD79A/BTK/PELI1/GPR183/HSPD1/ABL1/FCGR2B  
8/E2F4/BLM/CNOT9/CDK2/PML/DONSON/TIPIN/MSH2/RFWD3/RAD9A/RPA2/BTG2/PIDD1/EME2/CH  
RC7/LAMTOR5/VIL1/CD27/IFI16/GPX1/CST7/ARRB2/DNAJB6/DPEP1/CARD16/IGBP1/CARD18/SF  
DAC1/DDIAS/HYOU1/BID/NOC2L/NONO/KDM1A/WFS1/TAF9/GPX1/MAPK7/PTTG1IP/GRINA/SFRP2/  
1/LYN/IL2RA/TNFSF13B/SIT1/AXL/FADD/HCAR2/GPR183/ABL1/TNFAIP3/BCL10/ADAM17  
KIF2A/ARF4/STX18/COPG1/BNIP1/NSF/COPG2/GOLPH3L/KIF22/TMEM115/ERGIC3/COPB2/ARF5/  
AC1/ACTB/AP2M1/AP2S1/APH1B/CDC42/ARPC1A/CHN1/ARPC5/ACTR3/PTK2/AP2A2/CDK5R1/RHOA  
SPL1/LCMT1/MAD2L2/CENPE/PPP2R1A/NSMCE2/SPDL1/XRCC3  
SMD13/PSMC4/PSMD10/PSMD11/PSMD1/DONSON/PSMA7/PSMB3/TOPBP1/PSMD4/PSMD3/RBX1/PSMD  
O/FGFR4/MMP2/FLOT1/ADAM8/CAPN1/CAPNS1/CTSS  
8/PSMB10/PSMA5/PSMD13/PSMC4/ANAPC11/UBE2D1/PSMD10/PSMD11/PSMD1/PSMA7/UBE2E1/PSM  
T1/NAA10/MAD2L2/CENPE/NSMCE2/SPDL1/XRCC3/DDX11/FBXO5/SFPQ/DYNC1L1/ANAPC11  
4/CNOT9/CDK2/PML/ZBTB17/MED25/RPL23/MYBBP1A/BTG2/PIDD1/CHEK2/PLK3/CRLF3/PPP2R5B  
RC7/LAMTOR5/VIL1/CD27/GPX1/ARRB2/DNAJB6/DPEP1/CARD16/IGBP1/SFRP2/THBS1/CSNK2A1/  
L/MYO1G/LYN/RAC1/ACTB/CD47/FGR/WAS/GRB2/CDC42/ARPC1A/BRK1/ARPC5/ABL1/FCGR2B/ACT  
L/MYO1G/PLSCR1/LYN/RAC1/ACTB/CD47/FGR/WAS/GRB2/CDC42/ARPC1A/BRK1/ARPC5/ABL1/FCG

UP85/NUP43/RAE1/BAG3/NUP155/HSBP1/DNAJB6/NUP107/IER5/AKT1S1/DNAJC7/RPA2/MAPT/SE  
CCT8/PTGES3/NAT10/WRAP53/NOP10/DCLRE1B/GAR1/HSP90AA1/HNRNPU/EXOSC10/HNRNPA1/MAP  
RHEB/CCL3/PRPF19  
1/CHAF1A/NOC2L/ITGB3BP/NASP/CENPI/CENPK/NAP1L4/NAP1L2/SET/SMYD3/RBBP4/CABIN1/HE  
CIT/CDC42/CETN2/CALM2/CSPP1/PLK3/SH3GLB1/ZFYVE19/BCL2L1/RAB11A/KIF20B/KLHL21/RH  
BL2/MCM8/RAD21/MTBP/RPA2/CCT8/GNL3/ESCO2/WRAP53/CENPQ/LEMD2/BOD1  
SMD13/PSMC4/PSMD10/PSMD11/PSMD1/HLA-B/PSMA7/PSMB3/CALR/PSMD4/PSMD3/PSMD7/IKBKG/  
IG1/PRIM1/DONSON/TIPIN/POLE4/POLA1/PRIM2/RPA2/POLD3/SLBP/DBF4B/DNA2/CHEK2/ZPR1/

/SPDL1/RRS1/KIF14/KPNB1/CHMP1A/KATNB1/NDE1/ACTR3/CENPQ/BOD1/HNRNPU/RAB11A/KIF22  
4C/LZTS2/INCENP/RAB35/RTKN/CHMP3/CIT/KLHDC8B  
1/PCNA/E2F8/E2F4/CNOT9/CDK2  
1/PCNA/E2F8/E2F4/CNOT9/CDK2  
/FBX05/LSM10/ANAPC11/CCND2/APP/MTBP/CUL4B/DBF4B/RAD51C/HSPA2/MTA3/CCND3/ADAM17/  
/LYN/RAC1/ACTB/CD47/FGR/WAS/GRB2/CDC42/ARPC1A/BRK1/ARPC5/ABL1/FCGR2B/ACTR3/HSP9  
GES3/NAT10/WRAP53/NOP10/GAR1/HSP90AA1/HNRNPU/EXOSC10/HNRNPA1/MAPKAPK5/RPA1/ATR/  
NAT10/NBN/HNRNPU/ERCC1/EXOSC10/HNRNPA1/MAPKAPK5/ATR/HDAC8/SMG7/HNRNPD/DCP2/HNRN  
/LYN/RAC1/ACTB/CD47/FGR/WAS/GRB2/CDC42/ARPC1A/BRK1/ARPC5/ABL1/FCGR2B/ACTR3/HSP9  
8/RPL23A/TRAF7/RPL7A/RPL5/RPF2/NVL/RPL6/PAK1IP1/MRPL11/RSL1D1/EBNA1BP2/NOL9/EIF  
PRDX4/PDIA6/HVCN1/TXNDC9/TXNDC12/EGLN2/PRDX5/TMX2/GLRX2/PDIA3/SC02/P4HB/QSOX2/P  
/SPDL1/RRS1/KIF14/KPNB1/CHMP1A/KATNB1/NDE1/ACTR3/CENPQ/BOD1/HNRNPU/RAB11A/KIF22  
BIRC7/IL2RA/CD27/DFFA/FADD/BTK  
1/PCNA/E2F8/E2F4/CNOT9/CDK2  
2/ARRB2/PARM1/CCT8/PTGES3/WRAP53/HSP90AA1/NVL/HNRNPA1/RFC5/MAPKAPK5  
S2/INCENP/RAB35/RTKN/CHMP3/CIT/KLHDC8B  
SMD10/PSMD11/PSMD1/HLA-B/PSMA7/PSMB3/CALR/PSMD4/PSMD3/PSMD7/IKBKG/PSMD8/PSMA1/V  
/SPA17/VDAC2  
TB/MTA2/CENPI/CENPK/SMARCB1/CHD4/RBBP4/SMARCC1/CENPN/RBBP7/CENPQ/MBD3/ANP32E/MI  
RPS3/POLQ/OGG1/PTTG1IP/SFRP2/UBQLN4/CHEK2/MAGEF1/ERCC1/BCL2L1/UBR5/TWIST1/CCAR2  
MT3/AATF  
CENPE/NSMCE2/SPDL1/XRCC3  
FSF13B/BTK/PELI1/GPR183/FCGR2B/CD38/ATAD5/INPP5D/PTPRC/IKZF3/CASP3/CD22  
9/CDK2/PML/RFWD3/RPA2/BTG2/PIDD1/CHEK2/PLK3  
PS3/PRKD2/PNP/CLEC7A/ABL1/TNFAIP3/IL20RB/STOML2/GLMN/XCL1/CD247/PTPRC/MAP3K7/TR  
L2/RPS10/RPS15/RPL5/RPF2/RPL6/NSUN4/MTERF3/MRPL11/EIF6/RPS14/RPS27/DHX30/NIP7/R  
9/CDK2/PML/RFWD3/RPA2/BTG2/PIDD1/CHEK2/PLK3  
/CBL/VAMP8/MILR1/C12orf4/STXBP1/ADORA2B/IL13RA2/CD84/NECTIN2/CRLF2/CNR1/RHOH/AD  
PPP2R1A/NSMCE2/SPDL1/XRCC3/FBX05/NCAPH2/DYNC1LI1/ANAPC11  
NSMCE2/SPDL1/XRCC3  
DD/ABL1/TNFAIP3/BCL10  
SP/CENPI/CENPK/NAP1L4/NAP1L2/SET/SMYD3/RBBP4/CABIN1/CENPN/RBBP7/CENPQ/HAT1/MIS1  
NAT10/WRAP53/NOP10/GAR1/HSP90AA1/HNRNPU/EXOSC10/HNRNPA1/MAPKAPK5/RPA1/ATR/SMG7/  
ONSON/TIPIN/POLE4/POLA1/PRIM2/RPA2/POLD3/SLBP/DBF4B/DNA2/CHEK2  
9/CDK2/PML/RFWD3/RPA2/BTG2/PIDD1/CHEK2/PLK3  
1A/RANBP1/CEP250/NSFL1C/FBXW5/MARK4/TRIM37/CENPJ/RBM14  
RRS1/KIF14/KPNB1  
XO5/DYNC1LI1/ZNF207/RAD21/MTBP/NME6  
HNRNPA1/MAPKAPK5/ATR/SMG7/DCP2/HNRNPC/MAPK15/TERF1/HNRNPA2B1/XRCC5/PARN/SLX4  
NSMCE2/SPDL1/XRCC3  
/SPDL1/XRCC3  
9/CDK2  
9/CDK2  
9/CDK2  
/MAP1A/MARK4/NEDD1/KIF20B/KLHL21/ABHD17A  
9/CDK2  
9/CDK2  
  
/SPDL1/XRCC3/FBX05/DYNC1LI1/ANAPC11/ZNF207/RAD21  
  
L20RB/TLR2/ID01/XCL1



7/CHMP1A/WRAP73/DRG1/MZT1/CHEK2/CCSAP/HNRNPU/RAB11A/RHOA  
/XRCC3/FBX05/DYNC1LI1/ANAPC11/ZNF207/RAD21

/XRCC3/FBX05/DYNC1LI1/ANAPC11/ZNF207/RAD21  
DYNC1LI1/ZNF207/RAD21/MTBP/NME6

/HLA-F/CACNA1D/STXBP1/ADORA2B/ARF1  
orf4/STXBP1/ADORA2B/SERPINB9/IL13RA2/CD84  
TXBP1/ADORA2B/IL13RA2/CD84  
GDS/PTGES3  
CALR/EPB41L1/WDR1/EPB41L3/FMNL3  
A/ERCC1/UBA52/FANCF/RNF8/RPA1/MUS81/MSH6/ATR/DCLRE1C/EXO5

SFL1C/ACTR3/SPIRE1/DCTN1

TXBP1/ADORA2B/IL13RA2/CD84  
/SPIRE1/DCTN1  
CL17/AKIRIN1/THBS1

D177/HLA-F/STXBP1/ADORA2B/IL13RA2/CD84/BCR/ADGRE2/CCR2/PRAM1  
CALR/EPB41L1/EPB41L3/FMNL3/TLN1/WIPF2/RAB13/LLGL2/VPS4A/NCKAP1/EPB41  
Q/MIS18A/SMARCA5/POLE3

Q/ANP32E/MIS18A/RNF8/SMARCA5/DMAP1/POLE3/SRCAP

A2/CD84/NECTIN2/CRLF2/CNR1

/CENPN/RBBP7/CENPQ/MIS18A/SMARCA5/POLE3

8A/SMARCA5/POLE3

F1  
8A/SMARCA5/POLE3

P7/CENPQ/HAT1/MIS18A/SMARCA5/POLE3/IP04

P7/CENPQ/HAT1/MIS18A/SMARCA5/POLE3/IP04

D21

D21

EF2/CYTH4/ROB01/HRAS/RAB31/CDC42EP1/NUP62/FGD3/DNMT1/COL3A1/RHOG/RAB34/CFL1/RHO  
S1/SIRT6/NAA40/RUVBL1/JMJD6/MAPK3/PYGO2/MRGBP/BRCA1/MCRS1/ACTL6A/LMNA/HDAC1/PRM  
GAP1/TAX1BP3/CHML/PLXNA3/HRAS/ADAP1/PLCB1/DEPDC1/GMIP/EZH2/FGD3/GIT1/ASAP1/ADAP  
CNE1/CCNA2/TRIB3/CSF1/ECT2/CCNF/TGFB1/IQGAP3/STK26/DKK1/RIPK2/UNC119/PSRC1/GSTP  
D/ETV5/NCS1/LIF/SERPINE2/CSF1/ECT2/TGFB1/ARHGAP4/LGALS1/DKK1/CLCF1/TNFRSF12A/FL  
DKK1/CLCF1/TNFRSF12A/FLNA/ARHGEF2/P2RX4/ROB01/SERPINI1/PLXNA3/SMARCD3/NME1/NBL1  
RO3/SRC/CD3D/LGALS3/RAC2/TYROBP/S100A14/TGFB1/ITGAM/FCGR3A/RIPK2/ADA/HAVCR2/COL  
GFB1/IQGAP3/STK26/DKK1/RIPK2/UNC119/PSRC1/GDF15/IRAK1/S1PR2/CD74/PKN1/DUSP5/DSC  
ALG3/MGAT5/JAK3/DDOST/CANT1/B4GALT5/TMEM165/GALNT10/B3GNT5/GBGT1/FUT4/B3GNT9/SL  
K39/CDC7/GPD1L/TRIM6/BAX/MAPKAPK2/MIF/NAA10/PRKDC/SH2D3A/MAD2L2/MAPK3/MAST2/MAP  
S/SYK/HCK/S100A8/MUC1/HMGB3/GBP5/CARD9/PSMB9/CTSK/PSMD14/HMGB2/TRIM6/CCL5/MAPKA  
AURKA/DKK1/RIPK2/PRKCD/SMARCD3/NME1/MAPRE1/LARP6/TMSB4X/ADAM15/RAN/HSF1/CRMP1/M  
/NME2/FOXQ1/PKP3/KRT7/COL3A1/COMP/AKR1C3/LTB/CTSK/COL5A1/FRAS1/ST14/SHARPIN/PER  
HCK/S100A8/MUC1/CARD9/PSMB9/CTSK/PSMD14/MAPKAPK2/COLEC12/CD300A/UNC93B1/PRKDC/P  
1/CARD9/APOBEC3C/TRIM6/CCL5/CXCR4/SLFN13/UNC93B1/NT5C3A/TRIM11/ISG15/SPON2/IRF1  
RAB31/PACS1/PKP3/EZR/BSG/SCRIB/RHOG/RAB34/ANXA13/RHOQ/S100A10/FLOT2/PKDC/RAB15  
/POLR2G/SMARCA4/PPIH/TRIM59/STAT1/PABPC1/HDAC1/LEF1/NELFE/POLR2H/PPIA/ZC3H12A/D  
ALL2/SAE1/TRIM28/NUTF2/MAP2/MTCL1/MSN/OAZ1/PAK1/CAPN10/SLC51B/DYNC1H1/ZC3H12A/N  
9A1/PSMD2/HIF1A/GNGT1/NOL3/LMNA/S100B/HYOU1/PSMB2/PPARD/PSME3/MT3/NPEPPS/ADAM8/  
9A1/PSMD2/HIF1A/ATP6AP1/GNGT1/NOL3/LMNA/S100B/HYOU1/PSMB2/PPARD/PSME3/MT3/NPEPP  
/PGF/TMSB4X/CCL5/CXCR4/SEMA4A/CCL26/MIF/CREB3/MAPK3/SERPINE1/ZNF580/C3AR1/F2RL1

SF2/RABEP2/CORO1C/F2RL1/ARPC2/DYNLL1/TBC1D30/RAC1/MIEN1/WAS/PFN1/MAP4/TACSTD2/C  
RI/CPNE1/HDAC2/KDM1A/ITGA2/ZNF593/TXN/IFI16/PARP1/TFAP4/ANKRD33/HEY1/GZMA/ZNF67  
D2/TULP3/DEAF1/TGFB2/DVL2/PFN1/RALA/KAT2A/TRIM71/MED12/OVOL2/LUZP1/RARG/ABL1/SF  
6L/RFC2/DDX11/BLM/PARP1/CHD4/RUVBL2/MCM8/CETN2/XRCC6/POLQ/RBX1/CUL4B/DNA2/CHD1L  
1/NDC1/FBXO5/PSMD13/MYBL1/RAD21/RAD51C/HSPA2/RAD51D/EME2/SYCE1L/ERCC1/CCNE2  
CKAP1L/CCL2/CXCL13/LYN/RAC1/PLA2G7/CCL4/GPSM3/CCR1/C5AR1/PADI2/CALR/XCL2/CMKLR1  
AP1S/F2RL1/CAPZA1/CAMSAP2/STMN3/VIL1/NES/KIF2A/CAPZB/SWAP70/SH3GL1/KATNB1/WDR1/  
/GRB2/CDC42/VPS25/APP/ADRA2A/CBL/ARAP1/PTPN12/PTPN2/ADAM17/IFI6/HBEGF/BTC/EREG/  
C1/PLA2G7/CCL4/GPSM3/CCR1/C5AR1/CALR/XCL2/CMKLR1/SWAP70/LBP/CCL3/S100A7/CXCL17/  
K1/DAP/MAPT/PDCD6/CYCS/MTCH1/HSPD1/PIDD1/VCP/TRADD/BAD/TNFSF15/CASP8/PDCD2  
B3/PSMD4/PSMD3/RBX1/PSMD7/PSMD8/VHL/PSMA1/PSMB5/PSMA4/PSMD9/NOTCH1/RPS27A/VEGFA

1/MAPKAPK5/ATR/SMG7/DCP2/HNRNPC/MAPK15/TERF1  
2/RFC5/SMARCAL1/MSH6/ATG7/SLFN11/TERF1/E2F7/ZMPSTE24/LIG3/SMC1A/WIZ  
L/UBE2N/STUB1/RAB1A/PIN1/RPL11/PARK7  
L1

/STRAP/GEMIN2/COIL/SNRPD3/PRMT5/DDX20/GEMIN8/GEMIN6/SMN2/GEMIN5/SRSF10/PRMT7/AA

WIZ

C1/WNK2/FZD6/ASPM/TLE3/DCDC2/FZD7/CTNND2/MDFI/PSMB9/DDIT3/PSMD14/HNF1B/GRK6/PTK1/PSMB9/GIPC1/DDIT3/RBCK1/PSMD14/FBXL19/VPS37C/UBE2Z/PSMD2/RNF34/UBE2I/RNF19B/SCCNF/AURKA/PPT1/CTSV/SCPEP1/SQSTM1/DTL/UHRF1/CPVL/UBXN11/MAD2L1/CTSA/EZR/PSMB9/SLC25A6/MICALL2/ATAD3B/CTSK/SAE1/ATAD3A/BAX/RAB32/FANCG/SLC9A1/FUNDC1/HIF1A/SMI/VASP/PLEK/HRAS/CDC42EP1/HCK/TMSB4X/TWF2/CSF1R/SMIM22/TRPM2/RHOG/CFL1/RHOQ/S100AK1/CD74/CCDC88B/PTAFR/NCK2/ITGAV/EMILIN2/ADAM9/SYK/UNC13D/IL18/COL16A1/VTCN1/SK39/CDC7/GPD1L/TRIM6/BAX/MAPKAPK2/MIF/PRKDC/SH2D3A/MAD2L2/MAPK3/MAST2/MAP2K2/PA0A8/MUC1/CARD9/PSMB9/CTSK/PSMD14/MAPKAPK2/COLEC12/CD300A/UNC93B1/PSMD2/PAK1/IRFRSF18/JAK3/CD86/TNFSF9/CD2/IL34/ATP6AP1/SASH3/UBASH3B/SOCS1/IRF1/CTLA4/FSTL3/CDNFSF9/PRKDC/CD2/JMJD6/CD3E/TCIRG1/SASH3/SOCS1/IRF1/CTLA4/CD83/PLA2G2D/PRELI1/LHSPA8/MAP1S/MRPL17/MRPS12/F2RL1/MRPL47/MRPL9/MRPS23/CAPZA1/CAMSAP2/MRPL12/STMN3ASH3/ISG15/SOCS1/STAT1/RAB7B/CD83/LEF1/NCKAP1L/ADAM8/EVI2B/HCLS1/JAG1/CBFB/IL2R/AXIN1/NLE1/GPRC5B/PSMB4/PSMB8/PSMB10/PSMA5/PSMD13/PSMC4/FGFR2/RNF220/PSMD10/PSA/IFT52/TGM2/DVL3/FZD2/ITGB1BP1/TULP3/DEAF1/TGFB2/FGFR2/DVL2/PFN1/RALA/PAX8/KAT1/PRR7/BBC3/PMAIP1/F3/LCK/IFI16/CASP1/PML/RPS3/TFAP4/CTSD/HSPE1/PDCD5/FADD/CLEC3/NUPR1/PPP2R1A/WDR77/FBXO5/HDAC2/ARHGDI1B/OXTR/SYDE1/AGO2/CALR/PRDX4/MSX1/HPGDS01/XRCC3/CEP85/HAUS1/CDK2/CHORDC1/POC1A/CHMP3/HAUS8/PLK4/ODF2/CROCC/PARD6B/KAT2HSD1/BIN1/ARPC2/ARPC3/CORO1B/HIP1R/TPPP3/NCKAP1L/ARPC5L/RAC1/CTTN/WAS/VIL1/PFN1P1/F3/LCK/CASP1/PML/RPS3/TFAP4/CTSD/HSPE1/PDCD5/FADD/CLEC7A/RACK1/DAP/MAPT/PDCD01/XRCC3/CEP85/E2F4/HAUS1/CDK2/CHORDC1/POC1A/CHMP3/HAUS8/PLK4/ODF2/CROCC/PARD6BH/IRF7/FLOT1/NLRC5/RNF26/PQBP1/IFI16/TRAF3/POLR2L/DDX41/POLR2K/XRCC6/GPATCH3/UBAK1/SLC51B/CNPY4/BID/RANGRF/YWHAH/BBC3/PMAIP1/ITGB1BP1/CDK5/VIL1/STAC3/YWHAQ/YWH/IRF7/FLOT1/NLRC5/RNF26/PQBP1/IFI16/TRAF3/POLR2L/DDX41/POLR2K/XRCC6/GPATCH3/UBCD1/IRF7/NOC2L/ADAM8/PIK3CD/KDELR1/HCLS1/LYN/BIRC7/IL2RA/TCP1/CD27/DFFA/CCR5/AXYWHAB/CHCHD3/GZMB/PDCD5/STPG1/TIMM50/ROMO1/LETM1/TAZ/RHOT2/SLC25A5/TIMM13/APOO/VL2/PFN1/RALA/KAT2A/TRIM71/MED12/RARG/ABL1/SFRP2/RPS7/IFT172/BCL10/LMO4/MTHFR/K

/RPS3/KATNB1/CLIP3/DRG1/MAPT/CKAP2/ABL1/TBCD/STMN2/DCTN1/MAP1A/EML2/MECP2/CDK5RDE1/CLIP3/DRG1/MAPT/CKAP5/MZT1/ABL1/TBCD/STMN2/DCTN1/MAP7D3/EML2/MECP2/CENPJ/CD

PKAPK5

/CYP19A1/THBS1

E4/TYW3

BP1/PRNP/LARP6/EEF1E1/CDK4/TCOF1/CTSA/GSR/IGF2BP3/ZNF385A/RPL8/RPS6KA1/GSTM3/CP/DCAF13/RUSC1/PJA1/MAD2L1/RNF24/RNF145/PSMB9/TRAF2/RBCK1/PSMD14/SAE1/FBXL19/TRI1/PSMB9/GIPC1/DDIT3/RBCK1/PSMD14/FBXL19/VPS37C/UBE2Z/PSMD2/RNF34/UBE2I/RNF19B/S/DTL/UHRF1/CPVL/UBXN11/MAD2L1/CTSA/PSMB9/GIPC1/DDIT3/CTSK/RBCK1/PSMD14/FBXL19/C1/WNK2/FZD6/ASPM/TLE3/DCDC2/FZD7/CTNND2/MDF1/PSMB9/DDIT3/PSMD14/HNF1B/GRK6/PTK/EGFB/ELOVL7/UAP1L1/SLC2A6/B4GALNT1/ACSL4/ACSS1/DTYMK/GAL3ST1/TGFB1/PPT1/GAPDH/A/ECT2/TGFB1/IQGAP3/GPNMB/LGALS1/DKK1/RIPK2/ADA/HAVCR2/CLCF1/FLNA/BIRC3/CD44/GDF/DPM2/MUC1/CHST4/ALG3/MGAT5/JAK3/DDOST/CANT1/B4GALT5/TMEM165/HIF1A/GALNT10/B3GN/ZNF385A/SYNGR2/TLCD1/SPAG4/UBL4A/DTNBP1/CHMP4B/SYNGR1/COL5A1/CXCR4/VPS37C/SEC61/CHMP4B/TRIM28/CCL5/CD86/CXCR4/NUP210/ITGA5/SELPLG/VPS37C/HAVCR1/TRIM11/SLPI/IS8/SYK/IL18/FZD7/HMGB3/TNFRSF18/JAK3/TCF3/BAX/CD86/VAV1/SEMA4A/TNFSF9/PRKDC/CD2/IRC3/ITGB2/IRAK1/PRKCD/RELB/HRAS/SYK/HCK/IL18/S100A8/MUC1/C2CD4A/HMGB3/GRN/NPAS/BEP2/TCTN2/SSNA1/PPP2R1A/LAMA5/TUBA1A/TTL1/SFI1/DYNLRB1/IFT52/DYNLL1/DYNC1H1/LC7A11/ADORA1/PRNP/HRAS/FOXQ1/UNC5B/GRN/HSF1/DDIT3/TRAF2/CHMP4B/HMOX1/CCL5/BAX/CK2/BAIAP2L2/VASP/ADORA1/PLEK/HRAS/CDC42EP1/HCK/TMSB4X/TWF2/CSF1R/SMIM22/TRPM2/BEP2/TCTN2/SSNA1/PPP2R1A/LAMA5/TUBA1A/TTL1/SFI1/DYNLRB1/IFT52/DYNLL1/DYNC1H1/C

2RX4/C1QA/LAMB1/GPC1/EZH2/S100A8/CSF1R/SCRIB/GRN/AREG/CXCR4/NDN/B4GALT5/IL34/MA

ASP4/ANKRD1/TNFRSF11B/PSMB9/LTB/TNFRSF18/TRAF2/RBCK1/PSMD14/YBX3/CCL5/CCL26/TNF9/TRAF2/RBCK1/HMOX1/RHOC/TRAF5/FKBP1A/CANT1/UBE2I/SHARPIN/EDA/SIRPA/TRIM59/SECTX/DNAJC5/CASP2/UBE2M/HIF1A/NUPR1/XRCC2/HSP90AB1/HYOU1/BID/MT3/ADAM8/NONO/CCL2/A/ANKRD1/HSF1/HMGB2/CCL5/CD86/MIF/MAPK3/SERPINE1/SIRPA/SPON2/IRF3/LY86/PPARD/LDO/B3L1/TRAF2/HMGB2/YBX3/HMOX1/BAX/MIF/CREB3/HIF1A/SERPINE1/RNF34/PEA15/SLC35F6/BR

/LAMA5/NRCAM/PALLD/CCT2/UBAP2L/EPHB3/CCT4/CCT7/CD209/TCP1/FUT3/FOLR2/SPESP1/EMBC1/PPIA/ZC3H12A/LAMP3/TRIM31/SNF8/PLSCR1/APOBEC3G/CHMP3/IFI16/BANF1/PML/ILF3/IS1/U2AF2/SRSF9/SSB/RPS21/CPSF1/THOC5/INTS1/THOC6/CPSF6/EIF4A3/EXOSC5/BARD1/CPSF41/ZC3H12A/LAG3/NCKAP1L/ADAM8/FANCA/CARD11/CBFB/IL2RA/CD27/IL12RB1/CYP26B1/IL15/1/ZNF205/GSK3A/PSMD10/GPX1/YWHAQ/YWHAB/ARRB2/GZMB/DNM1L/PDCD5/STPG1/TIMM50/HSPD/PPIA/NELFB/CHMP3/SMARCB1/TFAP4/POLR2L/POLR2K/SUPT5H/SRPK1/NOTCH1/TRIM21/TARBP2/DAPK3/ARHGDIB/HCLS1/CDC42BPG/BCAR1/RAP2A/CDK5/CTTN/TNIK/PARVG/RALA/CDC42/GMFG/ADC42/TGFB3/ZMYND8/CDC42EP2/WRAP73/BRK1/AKIRIN1/PALM/ARAP1/DNM2/MARK4/DEF8/CENPJVL2/PFN1/RALA/KAT2A/TRIM71/MED12/RARG/ABL1/SFRP2/RPS7/IFT172/BCL10/LMO4/MTHFR/KIL4R/APP/CLEC7A/LBP/TUSC2/ADAM17/MAVS/TLR2/ALOX15B/TWIST1/SIGIRR/ADORA2B/EPHA2/FA/PML  
13/LYN/ITGB1BP1/ITGA2/TGFB2/PTPN6/PIEZ01/SWAP70/ITGB8/SFRP2/PTK2/ADAM17  
GES3/HSPA2/SGTA/TOR2A/CSNK2A1/HSPA5/HSPA14/PIIB/GAK

ML2/MECP2/CDK5R1/NIN  
X/LUM/EMILIN1/COL11A1/SFRP2  
A  
L20/RPL12

1/PSMB9/GIPC1/DDIT3/RBCK1/PSMD14/FBXL19/VPS37C/UBE2Z/PSMD2/RNF34/UBE2I/RNF19B/S25B/B4GALNT1/SRC/LHFPL2/ETV5/RPL39L/KIFC1/SERPINE2/TTK/GAL3ST1/TGFB1/FAM50A/AUR03/CDC25B/B4GALNT1/SRC/ITGA3/ETV5/RPL39L/ACSL4/LIF/KIFC1/SERPINE2/AKR1B1/DSG2/T03/CDC25B/B4GALNT1/SRC/ITGA3/ETV5/RPL39L/ACSL4/LIF/KIFC1/SERPINE2/AKR1B1/DSG2/TNP/HRAS/SYK/MTMR2/NUP62/GTSE1/UNC13D/SPAG5/MX2/GIT1/EZR/RAN/MICALL2/RANGAP1/GIP

1/ADAM9/HRAS/SYK/STK39/NUP62/EZH2/MAGED1/DTNBP1/TRAF2/MAPKAPK2/CXCR4/MIF/CD300A  
K7/RUVBL1/MAD2L2/PSMD2/FZD1/PYGO2/BCL9/IGFBP6/EDA/MLLT3/HDAC1/CSNK1E/LZTS2/FAM5

2/YWHAZ/FLNA/ITGB2/CEP131/PRKCD/SCAMP5/B3GAT3/PRNP/ADAM9/HRAS/SYK/GTSE1/CCT5/CS  
RNP/HRAS/FOXQ1/UNC5B/GRN/HSF1/DDIT3/TRAF2/CHMP4B/HMOX1/CCL5/BAX/DNAJC5/CASP2/UB  
K7/RUVBL1/MAD2L2/PSMD2/FZD1/IGFBP6/EDA/MLLT3/HDAC1/CSNK1E/LZTS2/FAM53B/PSMB2/ZN

CK1/HMOX1/RHOC/TRAF5/FKBP1A/CANT1/UBE2I/SHARPIN/EDA/SIRPA/TRIM59/SECTM1/IRF3/F2  
IM28/CXCR4/SEMA4A/SIRT6/NDN/MAP2/IQGAP1/PTK7/EFNA5/PAK1/CRABP2/NRCAM/HSP90AB1/L  
UBE2M/HIF1A/NUPR1/XRCC2/HSP90AB1/HYOU1/MT3/ADAM8/NONO/CCL2/ATF4/KIF14/CLN3/CDK5  
AFR/PGF/DDR1/PTHLH/BSG/COL16A1/HSF1/TRIM28/ITGA5/SH3PXD2B/MAPK3/MMP2/CAD/PPARD/  
MP4B/TRIM28/CD86/CXCR4/ITGA5/SELPLG/HAVCR1/TRIM11/FUCA2/CHMP4C/TNFRSF4/ITGB5/TR  
O/CARMIL1/RHOC/CCL26/ARPC4/SH3PXD2B/PAK1/BAIAP2L1/FCHSD1/BIN1/F2RL1/ARPC2/ARPC3  
2/HSP90AB1/ZC3H12A/SVBP/HSPBP1/OTUB1/FBXO5/GTPBP4/PRR7/AXIN1/U2AF2/KDM1A/BIRC7/  
RABEP2/CORO1C/F2RL1/ARPC2/DYNLL1/TBC1D30/RAC1/MIEN1/WAS/PFN1/MAP4/TACSTD2/CROCC  
/TRIM6/TRIM28/FKBP1A/GMNN/PYGO2/ACD/GPSM1/HSP90AB1/DDX11/HIP1R/FLOT1/EIF3D/KDM1  
OLR2/SPESP1/STX18/VPS18/CALR/CCR5/SYT1/DNM1L/STX4/BNIP1/NSF/GCA/NSFL1C/STX7/GNA  
/PIK3CD/HCLS1/LYN/LYAR/PTBP3/MB/DNASE2/RPS19/AXL/HCAR2/ACVR1B/PTPN2/ADAM17/HOXA  
/CD86/MAPKAPK2/MIF/CD2/IL27RA/SASH3/SIRPA/SPON2/ZC3H12A/BCL3/ADAM8/HDAC2/FRMD8/  
L3/CCL2/SHC1/ATF4/WFS1/GSK3A/ERO1A/ZBTB17/BAG3/CALR/DNAJB11/PPP1R15A/RACK1/PDIA

SMD13/MYBL1/RAD21/RAD51C/HSPA2/RAD51D/EME2/SYCE1L/CCNE2  
C5B/IL15/GALNT6/MUC20/SLC35C1/POMGNT1/MFNG/LFNG/POFUT2/GALNT7/LARGE2/GXYLT2/MUC  
L9/CXCL3/CXCL13/CXCR3/CCL4/CCR1/RNF113A/LOX/PADI2/PF4V1/CXCL11/CCR5/XCL2/CMKLR1  
L9/CXCL3/CXCL13/CXCR3/CCL4/CCR1/RNF113A/LOX/PADI2/PF4V1/CXCL11/CCR5/XCL2/CMKLR1

/CCL2/LYN/PLA2G7/CD47/CCL4/CALCA/CCR1/C5AR1/XCL2/CMKLR1/RPS19/CCL3/S100A7/CXCL1  
3CD/HCLS1/LYN/BIRC7/TCP1/CD27/CCR5/AXL/FADD/BTK/HCAR2  
2/ADAM8/HDAC2/FRMD8/APP/FADD/CLEC7A/LBP/CCL3/NFATC4/THBS1/MAVS/TLR2

BN/ERCC1/RNF8/NOTCH2/DOCK10/MSH6/TP53BP1/ATAD5/THOC1/PTPRC/CD180/UNG/SUPT6H/DOCK/CBL/VAMP8/MILR1/C12orf4/RAB3A/DEF8/BORCS6/ARL8B/STXBP1/ADORA2B/SNAPIN/VPS33A/IRE1/THBS1/RHOA/XKR8/FNBP1L/BECN1/ARF1/RHOBTB2/SNX3/PPARG/SPIRE2/ABCA7/SYT11/ARFADD/CLEC7A/HSPD1/ABL1

LI3/TNFAIP3/TRADD/PTPN2/ADAM17/CASP8/PIAS4

1/TNFAIP3/IL20RB/GLMN/XCL1/PTPRC/MAP3K7/TRIM27/IRF4/PDE4B/CD4/ANXA1/CCR214/PPIC/P3H2/P4HB/PIN1/OGFOD1/FKBP15/CRTAP

ELAVL1/PAIP1/TARDBP/PARN

PRNP/MVP/SYK/HCK/DDR1/IL18/DLG3/CSF1R/HSF1/NCF1/TNFRSF18/AREG/JAK3/CCL5/ITGA5/MK/TMSB4X/CASP4/ANKRD1/TNFRSF11B/PSMB9/LTB/TNFRSF18/TRAF2/RBCK1/PSMD14/YBX3/CCL5CDK4/EME1/ANKRD1/HSF1/DDIT3/HMGB2/CCL5/CD86/MIF/MAPK3/SERPINE1/SIRPA/SPON2/IRF31/HSF1/HMGB2/CCL5/CD86/MIF/MAPK3/SERPINE1/SIRPA/SPON2/IRF3/LY86/PPARD/LDOC1/ZC3A/POP1/CPSF1/TRMT112/TRMT6/USP14/FARSB/POLR2L/CPSF4/GTF3C2/KTI12/ZBTB80S/GTF3C1A2/EIF2S3/GSK3A/CDC123/EIF4A3/APP/PPP1R15A/UQCC2/RPS6KB2/RACK1/VIM/EIF2B5/KHDRB/CD86/MAPKAPK2/MIF/CD2/IL27RA/SASH3/SIRPA/SPON2/ZC3H12A/BCL3/ADAM8/HDAC2/FRMD8/

T9/SHC1/BCAR1/VIL1/EPS15L1/MVB12A/ARF4/GRB7/GRB2/CDC42/VPS25/APP/ADRA2A/CBL/ABL



K2/NUP85/ATAD2/NUP43/RAE1/XPO5/POLR2L/NUP155/AGO2/NUP107/NCOR2/POLR2K/TRIM71/SE

ARD1/CPSF4/APP/SLBP/SUPT5H/CTOP/SYMPK/CPSF3/SARNP/MAGOH/THOC2/POLR2D/SSU72/THO

/CASP8/SH3GLB1/BNIP3L/SREBF1/VPS11/YWHAG/ATG13/TFDP1/HAX1/CSNK2A2/PARL/HUWE1/US  
M01/S100A7/GNLY/PLA2G1B/HMGN2/RPL30/FAM3A  
/RPS7/RPS10/RPS15/RPS16/LTV1/UTP20/NOB1/FAM207A/BMS1/NOL10/UTP23/SURF6/WDR46/RP  
TDN2/DCTN1/PTPN1/COPS5/HSPA5/PPP2R5B/GFPT1/TLN1/GOSR2/TPP1/DAB2IP/FKBP14/ADD1/S  
D/ECM1/GPR183/CCL3/S100A7/ADAM17/RHOA/TNFRSF14/XCL1/TMEM102/CXCL10/DOCK8

MD/CKS2/PLAUR/DAB2/LIF/CSF1/ECT2/TTK/TGFB1/IQGAP3/GPNMB/STK26/DKK1/RIPK2/UNC119  
P1/PLCB1/DEPDC1/GMIP/EZH2/GIT1/ASAP1/ADAP2/SCRIB/RHOG/TBC1D16/RANGAP1/S100A10/R  
D3EAP/HDAC1/NUP93/NUP205/NUP37/NDC1/POLR2H/NUP188/ZC3H12A/KCNQ1/HDAC2/CHRA1/AC  
10/B3GNT5/GBGT1/FUT4/B3GNT9/SLC51B/NPC1/GALNT18/B3GNT7/GFPT2/MAN1B1/PLOD3/B4GAL  
10/B3GNT5/GBGT1/FUT4/B3GNT9/SLC51B/NPC1/GALNT18/B3GNT7/GFPT2/MAN1B1/PLOD3/B4GAL  
VBP/HSPBP1/OTUB1/FBXO5/GTPBP4/PRR7/AXIN1/U2AF2/KDM1A/BIRC7/CDK5/WFS1/UBE2L3/DNA  
HLH/BSG/COL16A1/HSF1/TRIM28/ITGA5/MAPK3/MMP2/CAD/PPARD/LDOC1/PAM/ARHGDIB/FKBP4/

/CD86/APBB1IP/SEMA4A/MAD2L2/LCP1/IL27RA/F2RL1/LEF1/ZC3H12A/BCL3/SLC11A1/CDH17/I  
/MAPKAPK2/MIF/CD2/IL27RA/SASH3/SIRPA/SPON2/ZC3H12A/BCL3/HDAC2/FRMD8/CD47/PTPN6/  
/MAPKAPK2/MIF/CD2/IL27RA/SASH3/SIRPA/SPON2/ZC3H12A/BCL3/HDAC2/FRMD8/CD47/PTPN6/  
CD86/CD300A/MNDA/SOCS1/IRF1/CTLA4/PLA2G2D/ZC3H12A/LAG3/LYN/CBFB/IL2RA/PTPN6/SAM

/PARP1/RPS3/USP1/CBX8/POLQ/FUS/BABAM1/OGG1/RPA2/PPP4C/TIMELESS/WRAP53/UBQLN4/HD

CSTD2/SEMA4B/SEMA4D/SEMA4F/SEMA5B/ARHGDIA/SEMA3C/SEMA3E/NFATC4/PTK2/IFRD1/CDK5R  
/MITF/PIAS3/CCR1/OSTM1/SBN02/LILRB4/ZNF675/GPR183/CCL3

G12B/ANGPTL3/APOA1/APOA5/APOC3/ACSM2A  
G12B/ANGPTL3/APOA1/APOA5/APOC3/ACSM2A

/POLR3D/POLR3H/POLR3C/HSPD1/MAVS/IRF5/TLR2/DHX9/TLR7/POLR2E/ZCCHC3/TLR8/POLR3F/

L10/PTPN2/RAB29/DUSP22/PTPRC/NECTIN2/CD22/RELA/CD19/PRKCB

FL1C/LEMD2/DCTN1

F2/EFNA3/MZB1/CD7/GDF15/EIF4EBP1/SHCBP1/PRKCD/ROB1/HSPB1/COL4A5/NCK2/ITGAV/EFN1/SRC/ETV5/RPL39L/KIFC1/TTK/GAL3ST1/TGFB1/FAM50A/AURKA/CTSV/WFDC2/CDC25C/PAQR5/RIB3/FBLN1/TGFB1/SPI1/DKK1/GSTP1/PMEPA1/PPP1R14D/CDKN2A/PPP1R14B/PKN1/DUSP5/PRK/FZD7/CTNND2/MDFI/PSMB9/DDIT3/PSMD14/HNF1B/PTK7/RUVBL1/MAD2L2/PSMD2/FZD1/PPP2R11A/MAPK3/NUPR1/RRAGC/TCIRG1/CHMP4C/HGS/NPC1/GPSM1/DYNLL1/PIM2/TOMM5/ATG101/MLST

1/PAIP1/TARDBP

18/DLG3/CSF1R/HSF1/NCF1/TNFRSF18/AREG/CCL5/ITGA5/MIF/CD300A/IQGAP1/EFNA5/CD3E/P

5/RAN/HSF1/CRMP1/DTNBP1/TRAF2/BAX/MAP2/FKBP1A/MAPK3/SLPI/UBASH3B/GPSM1/HSP90AB1

RT1/STX10/RAB35/TBC1D10B/EHD1/ARHGAP1/LEPROTL1/SNF8/RAB11FIP4/CCDC22/EHD2/LAMTO-DPA1/CCL5/CCL26/HLA-DPB1/SEC61A1/STXBP2/GBP2/HLA-DQB2/HLA-A/SIRPA/SOCS1/CD58/IA/HSP90AB1/DDX11/HYOU1/ARFGAP1/UBE2J2/EXTL3/HSPA4/CCL2/SHC1/ATF4/HSPH1/WFS1/DNA1/CTLA4/CD83/PRELID1/ZC3H12A/LAG3/NCKAP1L/ADAM8/FANCA/CARD11/CBFB/IL2RA/NFAM1/PF1/NCKAP1L/ADAM8/EVI2B/HCLS1/CBFB/IL2RA/CD27/CCR1/IL12RB1/IL15/IL4R/PNP/LILRB4/

/CNOT9/SHC1/BCAR1/VIL1/EPS15L1/MVB12A/ARF4/MATK/GRB7/GRB2/CDC42/VPS25/APP/ADRA2

/BANF1/PML/AGFG1/TMEM43/NUP155/CHMP1A/CTDNEP1/NUP107/DMPK/RPS19/VRK1/FAM118B/AN1/CDC42BPG/CDK5/GSK3A/CIT/CADM4/PRKD2/GRK2/APP/VRK1/CSNK1G2/CEMIP/ACVR1/CALM2/

/PSMD10/PSMD11/PSMD1/IL1R2/PSMA7/PSMB3/PSMD4/PSMD3/RBX1/PSMD7/IKBKG/PELI1/ZNF67

F/ACTB/CDK5/VIL1/AP2M1/STAC3/ACSL3/PRKCI/STX4/RACK1/CLIP3/STAC/STX7/CSK/VAMP8/T CCL4/CCR1/RNF113A/PADI2/PF4V1/CXCL11/CCR5/XCL2/CMKLR1/CCRL2

C2/FRMD8/APP/FADD/CLEC7A/LBP/CCL3/NFATC4/THBS1/MAVS/TLR2

MD4/PSMD3/PSMD7/PSMD8/ABL1/PSMA1/PSMB5/PSMA4/PSMD9/PUS7/PSMC3/SRF/PSMC5/OSM/LDB

T4/HCLS1/CCT7/TCP1/PARP1/BAG3

TPN6/LST1/GAL/BTK/PELI1/BTN2A2/FCGR2B/TNFAIP3/TWSG1/IL20RB/GLMN/TNFRSF14/IDO1/X

GNPTAB/TPP1/BECN1/SNAPIN/VPS33A/ARF1

GNPTAB/TPP1/BECN1/SNAPIN/VPS33A/ARF1

MD/CKS2/PLAUR/DAB2/LIF/CSF1/ECT2/TTK/TGFB1/IQGAP3/GPNMB/STK26/DKK1/RIPK2/UNC119  
K1/S1PR2/CD74/PKN1/DUSP5/PRKCD/ROBO1/ADORA1/PRNP/ADAM9/HRAS/SYK/STK39/IL18/EZH2

B2/ZC3H12A/PSME3/TNIP2/OTUB1/RCE1/HCF1/ADRM1/PSMB4/ACTB/PSMB8/PSMB10/PSMA5/PSM  
LMNA/MYO19/PRELID1/HIP1R/BID/UBE2J2/NPEPPS/YWHAH/BBC3/PMAIP1/VDAC1/GBA/UBE2L3/C  
L1/DYNC1H1/GPSM2/PIP4K2A/TBC1D30/LRFR1/ATXN2L/LRFR4/PLK4/MAP4/CROCC/STX18/KAT2A

SMD10/PSMD11/PSMD1/PSMA7/TACSTD2/PSMB3/PSMD4/PSMD3/PSMD7/SEMA3C/PSMD8/ABL1/PSMA

CFHR5/C6/CFHR4

CFHR5/C6/CFHR4/SERPINC1

GLB1/VPS11/YWHAH/ATG13/TFDP1/CSNK2A2/HUWE1/USP36/NMT1/HTRA2/ARIH2/UBL5/BAP1/TP5

1/AADAC/ANGPTL3/APOA5/APOC3

/TGFB1/AURKA/DKK1/CLCF1/TNFRSF12A/FLNA/S1PR2/ARHGEF2/P2RX4/ROBO1/SERPINI1/PLXNA3/TNFRSF12A/CD44/AGRN/PLEKH01/ROBO1/PLXNA3/EFNA4/VASP/NBL1/ITPKA/GPC1/DDR1/TWF2/TNFRSF12A/SNAP25/ARHGEF2/ROBO1/SERPINI1/PLXNA3/NME1/NBL1/ITPKA/HES4/EZH2/NME2/T3/TNFRSF12A/CD44/AGRN/PLEKH01/ROBO1/PLXNA3/EFNA4/VASP/NBL1/ITPKA/GPC1/DDR1/TWF2/FB1/ITGAM/FCGR3A/RIPK2/ADA/HAVCR2/CLCF1/C1QB/SUSD4/BIRC3/ITGB2/IRAK1/C1QC/CD74/5A2/CCL5/DPH2/CNOT11/MAPK3/EIF3B/NPM1/UPF3B/POLR2G/RBM3/PABPC1/TRNAU1AP/PPP1CA/P13A2/PCSK1N/SERPINE2/FBLN1/PAPLN/WFDC2/GAPDH/RIPK2/EFNA3/GPC3/BIRC3/CD44/PI3/CB/COTL1/PRKCD/SLAMF8/IIGLL5/ACP5/HRAS/SYK/UNC13D/EXOSC4/MX2/S100A8/LYZ/APOBEC3B/TNFRSF12A/KRT17/CDKN2A/PLXNA3/NDRG3/DDR1/EXOSC4/S100A8/TWF2/ADAM15/CDKN2D/TRPV

B2/ZC3H12A/PSME3/TNIP2/OTUB1/RCE1/HCF1/ADRM1/PSMB4/ACTB/PSMB8/PSMB10/PSMA5/PSM165/GALNT10/B3GNT5/GBGT1/FUT4/B3GNT9/SLC51B/NPC1/GALNT18/B3GNT7/GFPT2/MAN1B1/PL

QGAP1/MAPK3/MAP2K2/PAK1/PRKX/FGFR4/RAP2B/THY1/CAD/MARK2/EPHB3/FGFR1/PIM2/FGFR3/NASE6/GRN/CARD9/HMGB2/GBP2/SERPINE1/IL27RA/SLPI/ISG15/LYPD8/SPON2/F2RL1/STAB1/B

AK3/HMOX1/CD86/CD300A/MNDA/SOCS1/IRF1/CTLA4/PLA2G2D/ZC3H12A/LAG3/LYN/CBFB/IL2RA/USP2/CDKN2B/TESK1/LYN/CDKN1C/DUSP4/IL1B/GBA/CHORDC1/PTPN6/CDKN2C/TFAP4/SPRY4/ZN

S18/CHCHD3/CALR/SYT1/DNM1L/STX4/BNIP1/MFF/STX7/GNAI3/RAB3A/RCC1L/STOML2/VPS11/S

P1L/AP2A1/PIK3CB/SYT11/UBQLN2

RK2/DDIT4/BID/BCL3/KDM1A/TAF9/IFI16/PML/CRIP1/MSH2/RPS3/RAD9A/ABL1/SFRP2/NFATC4/F1A/MMP10/SUCO/P3H3/MMP2/PLOD2/PLOD3/PPARD/HDAC2/ITGA2/CTSS/ARRB2/TGFB3/CBX8/CT

K7/PPP5C/AXL/STK25/RACK1/ABL1/TNFAIP3/PDCD10/PSAP

/STMN3/PSMC4/BYSL/UBE2A/TBL1XR1/PRPF19/MFNG/DAD1/NBN/CAPN2/ZPR1/PHF6/PSMC3/SRF/PIEZO1/BAG3/CNN2/TLR5/FADD/BAD/BCL10/PTGER4/CASP8

2/CYP7A1

SH2/BTK/PELI1/GPR183/EXOSC3/BAD/CD38/TP53BP1/ATAD5/INPP5D/PTPRC  
SMD3/PSMD7/PSMD8/ABL1/PSMA1/PSMB5/PSMA4/PSMD9/PUS7/PSMC3/PSMC5/OSM/LDB1/YTHDF2/  
2/PPP4C/TIMELESS/WRAP53/UBQLN4/SPIRE1/MAGEF1/UBR5/TWIST1/MMS19/TP53BP1/HMGA2/TF

/TMPRSS3/SH3BP1/TYRO3/SRC/LGALS3/DAB2/DNM1/LOXL4/ATP1A1/LRP12/TYROBP/PDLIM7/TGF  
12A/FLNA/CD44/ITGB2/PLEKH01/ROBO1/PLXNA3/ITPKA/CDC42EP1/HCK/UNC13D/FGD3/TWF2/FM  
K1/S1PR2/CD74/PKN1/DUSP5/PRKCD/ROBO1/ADORA1/PRNP/ADAM9/HRAS/SYK/STK39/IL18/EZH2  
CERS6  
PKP3/KRT7/ESRP1/SCRIB/PLOD1/AKR1C3/CTSK/FLOT2/LAMC2/ST14/SHARPIN/CRABP2/PERP/LA

/THBS1/RHOA/XKR8/BECN1/ARF1/RHOBTB2/PPARG/SPIRE2/ABCA7/ARHGAP25/APPL2/RAC3/MYH9

C/SEMA4A/MSN/GNA12/RHOF/CCL13/S100B/MARK2/SLC9A3R1/SH3KBP1/CCL2/DAPK3/S100A13/F  
DYNLL1/DYNC1H1/BLOC1S4/CLN3/SFPQ/AP3M2/WASF1/IFT80/BAG3/CDC42/APP/ACTL8/AP3D1/C  
DYNLL1/DYNC1H1/BLOC1S4/CLN3/SFPQ/AP3M2/WASF1/IFT80/BAG3/CDC42/APP/ACTL8/AP3D1/C  
RDX1/MAPK3/PCNA/ZNF580/MMP2/SIRPA/MT3/HDAC2/CDK2/TXN/RPS3/DPEP1/CBX8/PCGF2/MAPK  
N1/CDC42BPG/CDK5/GSK3A/CIT/CADM4/PRKD2/GRK2/APP/VRK1/CSNK1G2/CEMIP/ACVR1/CALM2/  
PA/SPON2/F2RL1/RAB7B/ZC3H12A/NCKAP1L/IL1B/GBA/CD47/PTPN6/ARRB2/APP/CLEC7A/LBP/H

NRNPD/MYC/MAPK15/TERF1/HNRNPA2B1/XRCC5/TP53/PARN/MEN1  
/IL1B/ASCL2/PPP1CC/PRKCI/WDR1/GPR183/RHEB/NF2/CCL3/PRPF19

3/GSPT2/MRPS17/MRPS21/MRPS15/MRPL18/JMJD4/ETF1/MRPL37/EIF5A/MRPL27/MRPL28/MRPL5  
OA/ARF1/VPS4A/SPIRE2/CHMP6/CNTROB/MYH9/CHMP4A/ALKBH4

G6PC/GNMT

BHMT

/IL4R/PNP/LILRB4/AP3D1/AXL/BTK/BTN2A2/SART1/TOX/BAD/NKAP/RHOA/AP3B1/RUNX3/ZMIZ1  
PA2/PPP4C/TIMELESS/EXOSC3/WRAP53/UBQLN4/MAGEF1/MMS19/MSH6/TP53BP1/ATAD5/THOC1/P

DAB2/DNM1/LOXL4/LRP12/TYROBP/PDLIM7/TGFB1/ITGAM/RHOV/PPT1/FCGR3A/DKK1/UNC119/CO  
1/FAM50A/CTSV/WFDC2/CDC25C/BIRC3/CEP131/CDK16/RACGAP1/NDRG3/NUP62/ASPM/ZNF296/S  
/CTSA/IGF2BP3/ZNF385A/RPS6KA1/YBX3/EIF5A2/CCL5/DPH2/PDP1/CNOT11/MAPK3/EIF3B/SMP  
/NPLOC4/MAN1B1/DDX11/HYOU1/ARFGAP1/BCAP31/UBE2J2/FLOT1/EXTL3/CCL2/SHC1/ATF4/BBC  
5/PRNP/TMSB4X/HDAC7/EZR/HSF1/VSIG4/JAK3/HMOX1/NUTF2/IL27RA/ISG15/TNFRSF4/SIRPA/  
RSF14/CCL19/CD5/CAV1  
RY6/SLC4A2/SLC37A1/SLC12A8/SLC1A3/GABRA3/CLCN7/FGFR1/GABRR3/ATF4/SLC11A1/VDAC1/  
A/SIRPA/SPON2/F2RL1/RAB7B/ZC3H12A/NCKAP1L/IL1B/GBA/CD47/PTPN6/ARRB2/APP/CLEC7A/  
/RAB3A/RASSF8  
PN6/CD27/CD79A/MSH2/BTK/GPR183/MFNG/LFNG/ABL1/FCGR2B/BAD/VCAM1/PTPN2/ADAM17/ADG

POLR3F/POLR3A/PTPRS/TRIM56/LILRB1/RNF135/TICAM1/CACTIN/TRAF3IP1/POLR3G  
FC5/RPA1/UBE2N/POLE2/PARP10

IF4A3/PPP1R15A/UQCC2/RPS6KB2/VIM/EIF2B5/KHDRBS1/LARP4B/NAT10/MPV17L2/THBS1/RPL5  
G6PC/GNMT  
G6PC/GNMT

4B/SEMA4D/SEMA4F/SEMA5B/SEMA3C/SEMA3E/MAPT/ABL1/DBNL/DNM2/VEGFA/RAB11A/IFRD1/CD

TLA4/PLA2G2D/ZC3H12A/LAG3/CBFB/IL2RA/PTPN6/IL4R/PELI1/BTN2A2/FCGR2B/TWSG1/PTPN2

2/KHK/ALDH8A1/AKR7A3/AGXT2/AGXT/ALDOB/ADH4  
IRS1/ECHDC2/ECI2/ETFDH/ACOX1/ACAA1/IVD/ACAA2/IRS2/HSD17B4/GCDH/ACAT1/AMACR/ACAD  
D/AKR1D1/HA01/CYP4F2/CYP7A1/SULT2A1/CYP4A11/ADH4

HSPD1/MAVS/TLR2/TWIST1/DHX9/ADORA2B/EREG/TLR7/IL17D

/ERCC1/COPS5/UBA52/PP1E/POLR2I/POLR2J/RFC5/POLR2D/GPS1/GTF2H1/RPA1/POLR2E/ERCC3  
1/LIF/MPZL1/CSF1/TTK/TGFB1/BAMBI/CYBB/DKK1/RHBDF2/EFNA3/FOLR1/PMEPA1/MZB1/COL1A

FRSF12A/CD44/AGRN/PLEKH01/ROBO1/PLXNA3/EFNA4/VASP/NBL1/ITPKA/GPC1/DDR1/TWF2/MAP

1/FAM50A/CTSV/WFDC2/CDC25C/BIRC3/CEP131/CDK16/RACGAP1/NDRG3/NUP62/ASPM/ZNF296/S  
CSK1N/SERPINE2/PAPLN/WFDC2/GAPDH/RIPK2/EFNA3/BIRC3/CD44/PI3/CST1/ROBO1/SERPINI1

R/SCP2/PHYH/CAT/EPHX2/ACOX2/BAAT/SLC27A2/PIPOX/EHHADH/DAO/HAO2/HAO1/AGXT  
DAO/FTCD/UROC1/OTC/CPS1/TAT  
B/INSIG1/SEC14L2/APOA1/HMGCS2/APOA5/CYP7A1

R/SCP2/PHYH/CAT/EPHX2/ACOX2/BAAT/SLC27A2/PIPOX/EHHADH/DAO/HAO2/HAO1/AGXT  
R/SCP2/PHYH/CAT/EPHX2/ACOX2/BAAT/SLC27A2/PIPOX/EHHADH/DAO/HAO2/HAO1/AGXT  
/GDI1/MT3/HDAC2/RAP1GAP2/YWHAH/TBC1D30/FKBP4/MYLIP/CDK5/SPOCK1/GSK3A/INPP5J/MAP  
1/CCL5/CCL26/HLA-DPB1/STXBP2/GBP2/HLA-DQB2/HLA-A/SIRPA/SOCS1/CD58/IRF1/IRF3/HSP  
/RAB15/STXBP2/SYT8/STX1A/F2RL1/LYN/CDK5/FGR/ABR/SYT12/RIMS3/IL4R/VPS18/SYT1/ADR

/DNASE2/RPS19/AXL/ACVR1B/PTPN2/HOXA5/THRA/VEGFA/SMAP1/SRF/INHA/BPGM/MAEA/LDB1/P  
/SNPH/VPS33A/RAB8B/VAMP3/RAB3C/VPS33B/EXOC6/UNC13A/EXOC6B

DSS1/YWHAB/GRB2/TMEM120B/SYT1/XRCC6/PPP5C/RRM1/LIMS1/FARSA/TRADD/KRT10/BCL10/CT

CFHR5/HPX/C6/CFHR4  
S/PFKFB1/PCK2/FBP1/RBP4/G6PC/GNMT/ALDOB/PCK1  
L2/APOA1/HMGCS2/APOA5/CYP7A1  
R2/C7/MBL2/C8B/MASP1/F2/MASP2/CPN2/CPB2/C8A/C4BPA/CFHR5/C6/CFHR4

R/SCP2/PHYH/CAT/EPHX2/ACOX2/BAAT/SLC27A2/PIPOX/EHHADH/DAO/HAO2/HAO1/AGXT  
L2/APOA1/HMGCS2/APOA5/CYP7A1

R2/CIT/CDC42/TGFB3  
SMD3/PSMD7/DPF2/PSMD8/ABL1/PSMA1/PSMB5/PSMA4/PSMD9/PUS7/NOTCH1/PDCD2/PSMC3/PSMC  
/RCC2/ARHGAP4/DKK1/EFNA3/TNFRSF12A/FLNA/AGRN/FERMT3/ROBO1/PLXNA3/ITGAV/LAMB1/EF  
JMJD6/MAPK3/PYGO2/MRGP/UBE2I/P3H3/BRCA1/NSMCE2/STX1A/MCRS1/ACTL6A/LMNA/NUP93/P  
/COL11A1/EXT1/NOTCH1/MESP1/LDB1/HMGA2/MMP15/PAF1  
ST1/GAL/BTK/PELI1/BTN2A2/FCGR2B/TWSG1/IL20RB/GLMN/TNFRSF14/IDO1/XCL1  
ST1/GAL/BTK/PELI1/BTN2A2/FCGR2B/TWSG1/IL20RB/GLMN/TNFRSF14/IDO1/XCL1  
1/HNRNPU/RBMX/DHX9/RBM10/RBM24/SFSWAP/LARP1/HNRNPA0/HNRNPD/HNRNPC/SYNCRIP/HNRNP  
IM6/MIF/CD2/MAPK3/IL27RA/TCIRG1/ISG15/TNFRSF4/SOCS1/CD58/IRF3/F2RL1/SERPINB1/ZC  
2/IRF1/IRF3/F2RL1/STAT1/NPLOC4/POLR3K/DDIT4/AGBL5/IRF7/ZC3H12A/CXCL9/NLRC5/PLSC  
4/GDAP1/SLC35F6/CYC1/TIMM17B/BMF/NOL3/SLC25A22/HIP1R/BID/TOMM5/UBE2J2/DYNLT1/NP  
O/PSMA5/PTPN6/PSMD13/PSMC4/MLF1/PSMD10/PSMD11/PSMD1/SIPA1L3/PSMA7/PSMB3/PSMD4/P  
A10/SLC7A6/SLC36A1/SLC11A1/SLC38A5  
/FKBP4/MYLIP/CDK5/SPOCK1/GSK3A/INPP5J/DGUOK/SEMA4B/SEMA4D/SEMA4F/SEMA5B/ARHGDIA  
ZNF675/IL20RA/RAB3D/TNFAIP3/CSK/TMEM64/DEF8/CD38/TPP1  
1/NROB1/MAD2L2/NUPR1/TMIGD3/TNFRSF4/LRRC14/PRMT2/SFRP5/ZC3H12A/SRI/HEYL/HDAC2/N  
F2



/GXylT2/MUC6/MUC15/XXylT1/GCNT1/B3GNT8/ST3GAL2/ST6GALNAC2/C1GALT1C1/B3GNT4/GALN  
7/BAD/PTPN2/STYXL1/PIAS4/BCL2L1/PLAGL2/BECN1/PRKRA/CAV1/RPL11/NOX1/PARK7  
T3GAL4/EXTL3/B4GALT7/IL1B/B4GALT2/XylT2/UGDH/BGN/CHST2/LUM/CHPF/CSPG5/CHST12/CS  
T2/CTH/ABAT/PAH/OTC/CD01/AGXT/UPB1/CPS1/BHMT  
C1/INSIG1/APOA2/GPLD1/CYP7A1/APOC3  
BCG8/EPHX2/INSIG1/ABCG5/APOA2/LCAT/ANGPTL3/FABP4/APOA1/APOA5/CYP7A1/APOC3/G6PC  
1

HFD1/RGN/AOX1  
APOA2/LCAT/ABCB4/PON1/APOA1/APOA5/APOC3

1  
4R/APP/LBP/MAPT/CCL3/HSPD1/FCGR2B/THBS1/TLR2

6/MRPS11/POLD2/POLD4/MRPS9/RFC3/MRPS35/UBC/DNAJA1/RPA3  
2/GYS2/GCGR/G6PC/GNMT  
I2/ACOX1/ACAA1/HSD17B4/AMACR/PECR/SCP2/PHYH/CAT/EPHX2/ACOX2/BAAT/SLC27A2/PIPOX/  
1  
1/RDH5/CYP1A1/ALDH2/RBP4/ADH6/RDH16/CYP1A2/HAO1/TTR/SULT2A1/ADH1A/ADH1C/ADH1B/A  
BCG8/EPHX2/INSIG1/ABCG5/APOA2/LCAT/ANGPTL3/FABP4/APOA1/APOA5/CYP7A1/APOC3/G6PC  
D17B13  
/CXCL5/FCER1G/ICAM1/REG1A/LGALS9/STMN1/BAK1/SRC/TSP0/S100A14/TGFB1/GAPDH/RIPK2/  
FRSF12A/AGRN/ROBO1/PLXNA3/EFNA4/VASP/NBL1/ITPKA/GPC1/DDR1/TWF2/MAPK8IP2/CSF1R/N  
/CXCL5/FCER1G/ICAM1/REG1A/LGALS9/STMN1/BAK1/SRC/TSP0/S100A14/TGFB1/GAPDH/RIPK2/  
N/NABP2/CCT6A/MICALL2/DDIT3/CCT3/SAE1/CHMP4B/TRIM28/BAX/NUTF2/VPS37C/SEC61A1/HS

D44/ITGB2/CDKN2A/FERMT3/ITGAV/EMILIN2/LAMB1/ADAM9/UNC13D/DDR1/ZYX/ADAM15/COL16A  
/ADAM17/MAVS/TLR2/ALOX15B/TWIST1/SIGIRR/ADORA2B/EPHA2/TLR7

C2/GPNMB/LGALS1/HAVCR2/FXYD5/CDKN2A/CD74/PRKCD/PLXNA3/PRNP/PAG1/ADAM15/MUC1/FZD  
PPARGC1A/FABP1/ACADL/APOC1/INSIG1/RGN/PDK4/APOA5/CYP7A1/APOC3

/VPS45/CFTR/CTBP2/RAB3A/VPS11/STXBP1/SNPH/VPS33A/CAV2/RAB8B/TSNARE1/VAMP3/RAB3C  
177

RKCI/STX4/RACK1/CLIP3  
CORO1B/HIP1R/TUBB4A/CAPZA1/MKKS/FHOD3/CAMSAP2/FKBP4/MYADM/WAS/VIL1/PFN1/INPP5J/

3/GPLD1/LCAT/ALB/APOA1/APOA5/APOC3

STX7/GNAI3/RAB3A/RCC1L/VPS11/STXBP1/TAPBP/TAP2/GOSR2/SNAPIN/MFN1/SAMD9L/CAV2/VP

OA8/CTSA/TOMM40/ATP6V0B/DDIT3/TPCN1/CTSK/ATP6V0D2/CHMP4B/HMOX1/SOGA1/MTCL1/VPS3  
/CXCL5/FCER1G/ICAM1/REG1A/LGALS9/STMN1/BAK1/SRC/TSP0/S100A14/TGFB1/GAPDH/RIPK2/  
B1/NCK2/SLC7A11/IGF2BP1/LARP6/ELOVL1/EEF1E1/CDK4/TCOF1/IGF2BP3/ZNF385A/RPL8/RPS  
OA8/CTSA/TOMM40/ATP6V0B/DDIT3/TPCN1/CTSK/ATP6V0D2/CHMP4B/HMOX1/SOGA1/MTCL1/VPS3

ADRA2A/CBL/RACK1/PTPN2/ADAM17/PTPN1/PAK2/SH3BP5L/EREG/EGF/CAV1/DUSP22/PTPRC/NEU  
D74/BATF/PKN1/PRKCD/LAT2/C1QA/RELB/IGLL5/HLA-DRB1/HRAS/SYK/HLA-DQA1/UNC13D/TAP1  
YWHAB/GZMB/STPG1/RHOT2/SLC25A5/BAD/CASP8/BNIP3L/BCL2L1/YWHAG/HEG1/TFDP1/TMEM102  
AB3D/VAMP8/VPS45/CFTR/CTBP2/RAB3A/VPS11/STXBP1/SNPH/SNAPIN/VPS33A/RAB8B/VAMP3/R

CD80

P4F12/AR/SERPINF2/CYP4F2/CYP4A11  
EPR/FBP1/IGF2/GNMT

C27A5/CYP2C9

CCL19/CD5/CAV1

13/PSMC4/PSMD10/PSMD11/PSMD1/PSMA7/PSMB3/GRB2/PSMD4/PSMD3/PSMD7/IKBKG/BTK/PSMD8

POLR3F/POLR3A/PTPRS/LILRB1/RNF135/TICAM1/CACTIN/TRAF3IP1/POLR3G  
RBP4/G6PC/GNMT/ALDOB/PCK1

12A/AGRN/ROBO1/PLXNA3/EFNA4/VASP/GPC1/DDR1/TWF2/CSF1R/NECTIN1/UNC5B/EZR/BSG/TRP  
D2/PRNP/SYK/HCK/IL18/EZH2/TMSB4X/S100A8/FZD6/GLIS2/FOXS1/MDFI/DDIT3/TRAF2/RBCK1  
7/DOT1L/HAT1/MBD3/MORF4L2/MECP2/BAZ2A/PPHLN1/DNMT3B/SMARCA5/POLE3/CTBP1/SUV39H1  
/TRIM28/NUTF2/CARD10/GBP2/DKC1/MCRS1/CCT2/LMNA/RRS1/LZTS2/NUP93/NXT1/FAM53B/NUP  
AGED1/TRAF2/MAPKAPK2/CXCR4/MIF/IQGAP1/MAPK3/MAP2K2/PAK1/PEA15/FPR1/TGFA/TNFRSF1  
IRT6/NDN/MAP2/IQGAP1/EFNA5/PAK1/CRABP2/NRCAM/HSP90AB1/PRMT2/GDI1/MT3/CPNE1/CDK5  
PN2/CPB2/C8A/KLKB1/C4BPA/F12/CFHR5/DNASE1L3/C6/CFHR4  
T1/NAGS/GLS2/PRODH2/ALDH5A1/HAAO/ALDH1L1/ADHFE1/MTHFD1/AMDHD1/FTCD/UROC1/PCK1/T  
P4A11  
FGG/CFHR1/C4BPB/CFHR2/C7/FGA/MBL2/C8B/MASP1/F2/F11/F7/MASP2/APOH/CPN2/CPB2/C8A/  
LR2/TRAF4/RHOA/ACTN4/CCL19/TLR7/MAP3K7/COPS8/RTKN2/AGO1/RELA/NOD1/NOD2/CARD14/T

RBP2/PSMC3/POLR2I/POLR2J/POLR2D/DHX9/IFITM3/NELFA/POLR2E/SUPT4H1/HMGA2/NELFCD/G

IP1/GBA/UBE2L3/ZNF205/GSK3A/YWHAQ/YWHAB/GZMB/DNM1L/PDCD5/MFF/BAD/VPS35/CASP8/SH  
/CYP3A5/RBP4/ADH6/RDH16/CYP1A2/TTR/APOA1/APOC3/ADH1A/ADH1C/CYP2C8/ADH1B/ADH4/CY  
/SLC13A5/AGXT  
/SLC27A2/THRSP/FABP4/CYP4F2/CYP4A11/SLC27A5  
8/ABCG5/APOA2/LCAT/ABCB4/PON1/APOA1/APOA5/APOC3

BP1/RBP4/G6PC/GNMT/ALDOB/PCK1

T/RBP4

7/RPS3/AKIP1/CALR/APP/LIMS1/TRIP6/TRADD/TNFSF15/TLR2/TRAF4/ADGRG3/RHOA/ACTN4/CC

1/CLIP3/STAC

A5/CORO1C/ARPC2/EPHB3/KIF14/ITGB1BP1/RAC1/MYADM/PARVG/TACSTD2/AKIP1/CDC42/LAMB3  
T2A/IL4R/DMPK/TMEM119/MSX1/NOTCH1/CAPN2/NLN/MESP1/MORF4L2/RBPJ/RBM24/BHLHA15/HD

L2/TGFB1/ITGAM/AACS/GAPDH/RIPK2/HAVCR2/RHBDF2/YWHAZ/FLNA/ITGB2/CEP131/SNAP25/CD  
/HMOX1/SOGA1/MTCL1/ATP6V1C1/RRAGD/FOXK1/HIF1A/MAPK3/NUPR1/RRAGC/BMF/NPC1/GPSM1/

C3/NOP10/EXOSC9/EXOSC10/EXOSC7/INTS9/GTF2E2/INTS7/POLR2I/POLR2J/INTS4/POLR2D/TO  
A/CLN6/FA2H/FUT3/PLA2G15/SMPD4/FUT6/ST3GAL5/RACK1/ITGB8/CERS6/PSAP/UGCG/HEXB  
CR1/FADD/ACVR1B/CASP8/HOXA5/SMAP1/TMEM64/KITLG/HAX1/INPP5D/ZNF16/ACIN1/ANKRD54/

ILRB4/AP3D1/BTN2A2/SART1/BAD/NKAP/RHOA/AP3B1/RUNX3/ZMIZ1/CCL19/PIK3R6/PTPRC/NFK  
PIM2/ATG101/MLST8/CAPN1/PIP4K2A/ATP6V1H/ATP6V1E1/GBA/LAMTOR5/CAPNS1/CDK5/LAMTOR  
AM/THY1/ZSWIM5/MARK2/GDI1/EPHB3/MT3/CDK5/CTTN/PLXND1/TUBB2B/SEMA4B/SEMA4D/SEMA4

O1D/DNAJC13/RAB7A

L3/CCL2/SHC1/ATF4/WFS1/POMT2/GSK3A/ER01A/ZBTB17/BAG3/CALR/DNAJB11/PPP1R15A/RACK  
M1/CSNK1E/DDX11/PPP1CA/LEF1/PIM2/SRI/GTPBP4/CPNE1/HDAC2/KDM1A/ITGB1BP1/ZNF593/A

ERMT1/FRMD8/IL1B/FGR/MAPK11/CASP1/GSDMD/IL4R/HK1/CLEC5A/CCL3/ABL1/PTGER4/MAVS/T  
/SMPD2/NSMAF/DEGS1/ORMDL2/B4GALT3/ST3GAL4/ASAHI/GBA/FA2H/SMPD4/A4GALT/PIGC/PRKD  
OC6/RAE1/MVB12A/NUP155/NUP107/SEC13/RPS27A/UBA52/THOC2/RAB29/VPS37B/KPNA6/SEH1L  
OC6/RAE1/MVB12A/NUP155/NUP107/SEC13/RPS27A/UBA52/THOC2/RAB29/VPS37B/KPNA6/SEH1L  
PAQR8/MCM8/IL4R/MMP19/WNT4/SOHLH2/RAD51C/SPIRE1/PAQR7/ERCC1/HEXB/MASTL

POA2/APOH/ANGPTL3/APOA1/APOA5/APOC3

BP1/ATAD5/THOC1/DCLRE1C/PTPRC

BP1/ATAD5/THOC1/DCLRE1C/PTPRC

NT4

B/PP1E/PP1B/KPNA6/CAV2/LARP1/VPS4A/SRPK2/DDB1/P4HB/VAPA/TBC1D20/ADAR

B/CD79B/CD38/PTPRC/CD22/KLHL6/CD19/PRKCB/VAV3

A/TNFRSF14/XCL1/TMEM102/CXCL10/DOCK8

KP/CCT7/TCP1/PRKD2/ARRB2/PARM1/CCT8/PTGES3/NAT10/WRAP53/HSP90AA1/HNRNPU/NVL/EXO  
RA3/CLCN7/GABRR3/BEST1/TTYH2/SLC12A7/SLC26A2/GABRD/TTYH1/CFTR/GABRB3

IF/PBK/TRIB3/FBLN1/TGFB1/IQGAP3/GPNMB/STK26/DKK1/RIPK2/HAVCR2/GSTP1/CD44/GDF15/  
ADA/HAVCR2/C1QB/SUSD4/BIRC3/ITGB2/IRAK1/C1QC/CMTM3/PRKCD/LAT2/C1QA/RELB/IGLL5/H  
NFRSF12A/PTAFR/COTL1/PRKCD/NCK2/PLXNA3/BAIAP2L2/VASP/ADORA1/PLEK/CDC42EP1/USH1C  
P3/P2RX4/ADORA1/PLCB1/MTMR2/BICC1/WNK2/FZD6/MAPK8IP2/ASPM/TLE3/DCDC2/FZD7/CTNND  
V2/GRN/P3H1/CXCR4/IQGAP1/PTK7/EFNA5/SF3A2/FZD1/PAK1/CRABP2/ANKRD27/RELN/MARK2/G  
A/FA2H/SMPD4/A4GALT/PRKD2/ST3GAL5/RACK1/CSNK1G2/CERS6/HACD1  
AB3A/VPS11/STXBP1/TAPBP/TAP2/GOSR2/SNAPIN/SAMD9L/CAV2/VPS4A/VPS16/C2CD5/RAB8B/V  
/MRPS15/MRPL18/MRPL37/MRPL27/MRPL28/MRPL51/MRPL11/MRPL15/MRPL4/MRPS24/MRPL33/MR  
2/SLC7A8/SLC3A2/SLC7A10/SLC7A6/SLC36A1/SLC38A5/SLC38A6  
G3/NUP85/NUP43/RAE1/XPO5/SRRT/HENMT1/POLR2L/NUP155/DROSHA/AGO2/TDRKH/NUP107/NC0

P1R/TUBB4A/CAPZA1/MKKS/FHOD3/CAMSAP2/FKBP4/MYADM/WAS/VIL1/PFN1/INPP5J/TACSTD2/C  
FS1/UBE2L3/GSK3A/UBE2D1/PSMD10/ARRB2/DCUN1D5/PELI1/GNL3/TNIP1/PTTG1IP/PDCD6/VCP  
/USP14/CPSF4/KTI12/ZBTB80S/NAT10/FAM98B/GTPBP3/ADAT3/PUS7/DUS2/CTU2/POP5/SEPHS1  
GSK3A/ERO1A/ZBTB17/CALR/DNAJB11/PPP1R15A/RACK1/PDIA6/CXXC1/TBL2/ATP6VOD1/VCP/SR  
4GALT7/IL1B/B4GALT2/XYL2/UGDH/BGN/CHST2/LUM/CHPF/CSPG5/CHST12/CSPG4/CEMIP/EXT1

ARHGAP4/AURKA/PPT1/PSRC1/TNFRSF12A/KRT17/CDKN2A/PLXNA3/NDRG3/DDR1/EXOSC4/S100A8

/STK3/FAF1/PDIA3/CAV1/PTPRC/STK4/HYAL2/HTRA2  
PV2/RPS6KA1/HSF1/FOXS1/YBX3/CXCR4/ZP3/SH3PXD2B/PRKDC/SLC9A1/EFNA5/PAK1/CRABP2/S  
EC3D/TNIP1/SRPK1/NOTCH1/MAVS/OAS3/TARBP2/PIIE/PIIB/IFITM3/CCL8/HMGA2/PARP10/MOR  
/MRPS15/MRPL18/MRPL37/MRPL27/MRPL28/MRPL51/MRPL11/MRPL15/MRPL4/MRPS24/MRPL33/MR  
MST1R/SPESP1/SNU13/HOXD9/CCT8/PLCD4/HVCN1/SPA17/VDAC2/RAB3A/HEXB/TARBP2  
IRF1/IRF3/F2RL1/RAB7B/LRRC14/IRF7/TNIP2/FLOT1/SMPDL3B/LYN/CTSS/CD300LF/UBE2D1/T  
IKBIP/BLM/KDM1A/SWI5/DNMT3A/IFI16/PML/PARP1/GPX1/MSH2/GRB2/TOPBP1/XRCC6/RRM1/BA

B/ACSL1/APOC1/INSIG1/APOA2/APOH/PCK2/GPLD1/AADAC/RGN/THRSP/FABP4/MOGAT2/APOA1/A  
T/PAH/DAO/CYP2E1

ACADL/MST1/APOC1/LEPR/INSIG1/PFKFB1/FBP1/CYP7A1/APOC3  
2/ATP6AP1/ATP6V1H/CLN3/SLC11A1/RAB20/ATP6V1E1/KCTD7/CLN6/SLC4A3/SLC4A11/ATP6VOC

DD/ADAM17/MAVS/TLR2  
GBP2/PSMD2/HIF1A/MAPK3/SIRPA/CCL13/TNFRSF11A/PSMB2/RPS6KA4/ZC3H12A/PSME3/TNIP2/

1/KIF20B/ABHD17A  
OLE2/PARP10

SMPD2/NSMAF/DEGS1/ORMDL2/B4GALT3/B3GALNT1/SMPDL3B/ASAH1/CLN3/GBA/CLN6/FA2H/FUT3  
SL6/HSD17B4/GCDH/ACAT1/TDO2/HSD17B8/DGAT2/ACSM3/ACSL5/ACSL1/BAAT/AASS/ACOT12/PI  
SL6/HSD17B4/GCDH/ACAT1/TDO2/HSD17B8/DGAT2/ACSM3/ACSL5/ACSL1/BAAT/AASS/ACOT12/PI  
IP/MFF/SH3GLB1/BNIP3L/SREBF1/CACNB3/CDK5R1/VPS11/ATG13/HAX1/CIB1/CSNK2A2/PARL/H

UP155/NUP107/TRPM4/GNL3/UBA2/PIAS4/ZMIZ1/SEH1L/SUMO2/AAAS/PARK7/EGR2/RELA/SUMO3

5/HNRNPA2B1/XRCC5/PARN  
/WNT5A/LSM14A/CACTIN/UBE2K

AJC6/MGAT5/IGFBP3/PGP/PPP1R37/PPM1M/PHPT1/FKBP1A/CD300A/PDP1/PPP2R1A/PPM1H/SLC3

ARA/LPIN2/ACAD11/AIG1/ACACB/CPT1A/ECHS1/HADH/MCEE/ACADS/NUDT7/IRS1/ECHDC2/ECI2/  
5/APOB/CYP1A1/APOA2/ALDH8A1/CYP3A5/RBP4/ADH6/RDH16/CYP1A2/TTR/APOA1/APOC3/ADH1A  
/CPT2/HIBCH/PRKAG2/PPARA/ACAD11/ACACB/CPT1A/ECHS1/HADH/ACADS/POR/IRS1/ECHDC2/EC

2/PPP2R1A/PAK1/SMARCA4/PPP1R9B/OSGIN2/PPARD/MT3/CDK5/MEG3/PHB/DNAJB2/TGFB2/GSK3

2/NUP107/NCOR2/POLR2K/TRIM71/SEC13/TARBP2/POLR2I/POLR2J/POLR2D/DHX9/SEH1L/POLR2  
2/NUP107/NCOR2/POLR2K/TRIM71/SEC13/TARBP2/POLR2I/POLR2J/POLR2D/DHX9/SEH1L/POLR2

5J/CAPZB/CLIP3/TBCD/STMN2/VDAC2/ADD3/EML2/MTPN/SPTAN1  
/GSTA1/CYP4F2/CYP2B6/CYP4A11/CYP2E1/CYP2C8/CYP2C9/CYP2A6  
BCB4/APOA1/APOA5/APOC3/G6PC  
4A11  
1A2/GSTA1/CYP4F2/CYP2B6/CYP4A11/CYP2E1/CYP2C8/CYP2C9/CYP2A6  
/CPT2/HIBCH/PRKAG2/PPARA/ACAD11/ACACB/CPT1A/ECHS1/HADH/ACADS/POR/IRS1/ECHDC2/EC  
3/TAF1D/UBTF/DHX9/GTF2H1/TBP/SSU72/POLR2E/ERCC3/TAF1B/PABPN1/FIP1L1/CSTF3/SNRPD

RPA/F2RL1/ZC3H12A/BCL3/SLC11A1/IL1B/CD47/IL12RB1/AXL/FADD/CLEC7A/HSPD1/ABL1

DKN2D/DTNBP1/PHPT1/CD300A/MAD2L2/RGS14/PPP2R1A/NPM1/SPRED1/THY1/CORO1C/UBASH3B/

SL1/ACADL/EPHX2/CYP1A1/CYP4F3/ACOT12/SLC27A2/CYP2A7/CYP1A2/GSTA1/CYP4F2/CYP2B6/  
PPP1R3B/PPARGC1A/KHK/MST1/LEPR/PFKFB1/RORC/GPLD1/RGN/FBP1/IGF2/PDK4/GCGR/GNMT  
T/IVD/QDPR/GOT2/ACMSD/GCDH/ACAT1/TDO2/KMO/ALDH7A1/CSAD/GPT2/ARG1/SHMT1/RIDA/GLS

NF1/SMARCB1/ILF3/ISG20/CDC42/GRK2/APOBEC3D/TNIP1/VCP/SRPK1/NOTCH1/MAVS/CTBP2/HT  
ECN1/RHOBTB2/PPARG/ABCA7/ARHGAP25/APPL2/RAC3/MYH9

TA1/ADH4  
AB10/FGFR2/NES/BABAM1/TRIM71/NDE1/NF2/ZNF335/OVOL2/SFRP2/KDF1/AKNA/CTNNA1/NOTCH

IF/PBK/TRIB3/FBLN1/TGFB1/IQGAP3/GPNMB/STK26/DKK1/RIPK2/HAVCR2/GSTP1/CD44/GDF15/

/HRAS/SYK/STK39/EZH2/CSF1R/MAGED1/TRAF2/MAPKAPK2/CXCR4/MIF/IQGAP1/MAPK3/MAP2K2/

/PTPN2/PTPN1/TXNDC12/BCL2L1  
/ITPKA/EZH2/NME2/TWF2/ANKRD1/TRPV2/GRN/TIMP2/TCF3/P3H1/CXCR4/IQGAP1/PTK7/EFNA5/  
LC25A5/BAD/CASP8/BNIP3L

D2/FA2H/TGFB2/MYOF/A4GALT/EPB41L3/BIN2/PSAP/DNM2/UGCG/SH3GLB1/RAB3A/PACSIN2/PAC  
CL3/SLC11A1/IL1B/CD47/IL12RB1/AXL/FADD/CLEC7A/HSPD1/ABL1

S14/PPP2R1A/NPM1/SPRED1/THY1/CORO1C/UBASH3B/SOCS1/CEP85/DUSP2/CDKN2B/TESK1/LYN/

/MAPT/CCL3/ABL1/ZNF746/FCGR2B/BAD/CASP8/CAPN2/CDK5R1/DAXX/RHOA  
A/SNX10/ADAM8/MITF/RAC1/CALCA/TGFB3/TMEM119/ZNF675/IL20RA/RAB3D/TNFAIP3/CSK  
ADD/PTPN2/PTPN1/MAVS/IRF5/OAS3/HLA-F/IFNAR2/CDC37/IFI6/IFITM3/YTHDF2/IP6K2/METT  
ADD/PTPN2/PTPN1/MAVS/IRF5/OAS3/HLA-F/IFNAR2/CDC37/IFI6/IFITM3/YTHDF2/IP6K2/METT  
C3H12A/CSE1L/SNRPF/FERMT1/SIX2/HTATIP2/KPNB1/HCLS1/GEMIN7/NUP85/PML/BAG3/NUP155

ATAD5/THOC1/PTPRC/UNG/SUPT6H/POU2F2/TNFSF13/FGL2/CD40

RRT/POLR2L/NUP155/DROSHA/AGO2/NUP107/NCOR2/POLR2K/TRIM71/SEC13/TARBP2/POLR2I/PO

/LZTS2/ZC3H12A/CCT4/FERMT1/HCLS1/CCT7/TCP1/BYSL/PARP1/BAG3/LILRB4/CCT8/NF2/PKIA

A2/CUL4B/POLD3/PRPF19/COPS6/CHD1L/RPS27A/ERCC1/COPS5/UBA52/PP1E/POLR2I/POLR2J/R  
1B/PTPN2/HOXA5/THRA/VEGFA/SMAP1/SRF/INHA/BPGM/MAEA/LDB1/PKNOX1/RPS14/INPP5D/ZNF  
N/ACAN/GPC2/HEXA

X2/JAG2/HEYL/NLE1/JAG1/ITGB1BP1/IL2RA/DNER/TGFB2/PLXND1/APH1B/ANXA4/LLGL1/PRKCI  
CL19

NRCAM/HSP90AB1/GDI1/MT3/CPNE1/CDK5/CTTN/RNF157/WASF1/SEMA4B/SEMA4D/SYT1/SYT3/SE  
S6KA4/OTUB1/NOC2L/KDM1A/AKAP8L/IL1B/ATAD2/NAP1L2/SET/SMARCB1/PADI2/RUVBL2/PRKD2

ALL2/DVL3/FZD2/TULP3/DEAF1/TGFB2/DVL2/PFN1/GORAB/RALA/KAT2A/TMEM107/SEMA3C/TRIM

/IRF1/IRF3/HSP90AB1/STAT1/IRF7/HLA-DQA2/TRIM31/NLRC5/HLA-DRB5/PML/SOCS3/HLA-B/T

TPG1/RHOT2/SLC25A5/BAD/CASP8/BNIP3L/BCL2L1/YWHAG/TFDP1/TMEM102/NAIF1/CNP/THEM4/



D4B/RAB29/RAB27B/IFT22/RAB9A/RAB40C/RAB13/RAB1A/RAB36/RAB8B/RAB1B/MADD/RAB22A/R  
2/IFRD1/CDK5R1/RHOA/EPHB2/RYK/FSTL4/SEMA3F/TRIM46/SEMA6B/SEMA4C/PTPRS/TRAK2/LRP  
4V2/RDH5/APOB/CYP1A1/APOA2/ALDH8A1/CYP3A5/RBP4/ADH6/RDH16/CYP1A2/TTR/APOA1/HMGC

/ATR/PTPRC/CXCL10/MYC/TLK2/ZMPSTE24/XRCC5/TP53/ELK1/MEN1

1/WNT5A  
CL9/CXCL3/CXCL13/DEFB1/SLC11A1/JCHAIN/RPL39/PF4V1/REG1B/CXCL11/RPS19/ROMO1/S100  
BBP8/RNASET2/PCNA/PELO/RRS1/RFC2/POLR3K/ERI3/REX04/ZC3H12A/NCBP2/USB1/PNKP/NHP2  
13/IFI16/CASP1/PML/IL1R2/GSDMD/ARRB2/APP/HK1/CARD16/CLEC7A/CARD18/CCL3/TNFAIP3/

/CXCR4/CASP2/ABHD12/SLC9A1/MAPK3/SMPD2/IRF1/STAT1/SLC1A3/MKKS/TNC/RAC1/ITGA2/IL

STD2/ANGPT2/SEMA3E/NF2/TBCD/THBS1/NOTCH1

TP53/APEX1/FAM168A

580/SIRPA/STAT1/HDAC2/LDHA/TXN/MB/GPX1/RPS3/CBX8/PCGF2/MAPK7/PPP5C/AXL/STK25/RA

A5/BAD/CASP8/BNIP3L/YWHAG/TFDP1/TMEM102  
UP107/SEC13/RPS27A/UBA52/VPS37B/KPNA6/SEH1L/CAV2/CAV1/MVB12B/AAAS/TRIM15/NUP214

ZC3H12A/HDAC2/TXN/DNMT3A/CRIP1/RPS3/CBX8/PCGF2/MAPK7/PPP5C/AXL/RPL23/STK25/RACK

R/TUBB4A/CAPZA1/MKKS/KIF14/FHOD3/FKBP4/GBA/MYADM/VIL1/PFN1/INPP5J/CAPZB/CDC42/C  
ADD/PTPN2/PTPN1/MAVS/IRF5/OAS3/HLA-F/IFNAR2/CDC37/IFI6/IFITM3/YTHDF2/IP6K2/METT  
UP107/SEC13/RPS27A/UBA52/VPS37B/KPNA6/SEH1L/MVB12B/AAAS/TRIM15/NUP214/TSG101/TP

2/IRF1/IRF3/IRF7/BCL3/LAG3/CARD11/IL1B/ASB1/APP/CLEC7A/LBP/BCL10/TNFSF15/THBS1/  
25A15/SLC38A3/SLC1A2/SLC13A5/SLC22A1

18/TRAF2/CCL5/MAPKAPK2/CXCR4/CD300A/CARD10/EFNA5/MAPK3/MAP2K2/PAK1/PEA15/FPR1/S  
8

CMBL/CYP2J2/EPHX1/CYP2A13/BCHE/CSAD/SULT1B1/ACSL1/EPHX2/CYP1A1/GSTA2/BAAT/NAT2/  
KB1/C4BPA/F12/CFHR5/C6/CFHR4

1/NUMBL/LEF1/FGFR1/KIF14/KDM1A/LYN/RAB10/FGFR2/NES/C5AR1/RRM1/TRIM71/NDE1/RERE/

/GSDMD/ARRB2/APP/HK1/CARD16/CLEC7A/CARD18/CCL3/TNFAIP3/CD33/CASP8/S1PR3  
CASP8/BNIP3L/YWHAG/TFDP1/TMEM102  
3/EFNA4/VASP/GPC1/TWF2/CSF1R/NECTIN1/UNC5B/EZR/BSG/TRPV2/CRMP1/DOK2/LINGO1/CXCR  
DAM9/SYK/S100A8/ASPH/CASP4/IFT57/GRN/HSF1/CARD9/TRAF2/PSMD14/BAX/BEX3/MAPK3/NUP  
CR4/FKBP1A/GPR35/P2RY6/FPR1/THY1/UBASH3B/NOL3/C3AR1/F2RL1/PLCB3/P2RX5/C1QTNF1/T  
HOC1/PTPRC

A/MEIS2/BTG2/MAP1A/MECP2/SRF/IFT20/LGMN  
/BCL10/MAVS/PLA2G1B/TLR2/TLR7/IL17D/PTPRC/RAB1A/TLR8/FFAR2/PARK7/HYAL2/ANXA1/NO

A/TM7SF2/GPAM/APOB/ACADL/APOC1/EPHX2/INSIG1/APOA2/RORC/SEC14L2/APOA1/APOA5/CYP7

L/APOBEC3C/CHIT1/PDE4A/SLC9A1/DCTPP1/NT5C3A/NEU1/GM2A/NT5C/ACOT7/FUCA2/PDE7A/AM

/GPC2/HEXA

AM1/MSX1/RAD9A/TIMELESS/EID3/WRAP53/HDAC10/SPIRE1/PIAS4/UIMC1/APBB1/RNF8/DHX9/T

MP4B/TRAPPC4/RAB32/VPS37C/CHMP4C/ANKRD27/STX1A/COR01C/STX6/HGS/PPP6R1/RAB7B/TGF

PAM/FABP1/CAT/APOB/ACSL1/APOC1/INSIG1/ANG/APOA2/APOH/PCK2/GPLD1/AADAC/RGN/THRSP  
/ESR1/AKR1C4/PPARGC1A/RDH5/UGT2B7/CYP1A1/SRD5A2/ALDH8A1/CYP3A5/RBP4/ADH6/RDH16/  
1B2/OR11G2/OR10H1/OR5V1/OR1Q1/OR11A1/OR8B8/OR1C1/OR2H1/OR10P1/OR1L3/OR2L13/OR1G  
T2A/FBLN5/MT1A/APOM/MT1M/MT1G/ABCG2/MT1E/FABP1/CAT/IYD/AKR7A3/MT1X/HP/RGN/PON3/  
8A/KLKB1/C4BPA/F12/CFHR5/C6/CFHR4  
H3B/STAT1/RAB7B/HDAC1/FSTL3/TFE3/NCAPG2/LEF1/IRF7/NCKAP1L/EVI2B/HCLS1/JAG1/MITF

NCL/POLR2L/GTF3C2/POLR2K/GTF3C1/NIFK/NABP1/GTF3C5/INTS9/PIH1D1/GTF2E2/INTS7/POL

3G/TRMT112/NSUN5/TRMT6/FTSJ3/HENMT1/APOBEC3D/KTI12/TSR3/NAT10/NOP10/GAR1/GTPBP3  
F8/CHMP3/PTPN23/PLEKHJ1/SNX12/WDR91/TBC1D10C/UBE20/TMEM87B/GGA1/DENND5A/WIP1/H

274/ZAP70

2/IRF1/IRF3/IRF7/BCL3/LAG3/CARD11/IL1B/ASB1/APP/CLEC7A/LBP/BCL10/THBS1/NMI/GLMN  
/SHARPIN/PERP/CNFN/PALLD/HDAC1/KRT18/FGFR1/SLC9A3R1/JAG2/CAPN1/HDAC2/SULT2B1/KR

0/NOTCH1/SFRP4/ALOX15B

107/NCOR2/POLR2K/TRIM71/SEC13/TARBP2/POLR2I/POLR2J/POLR2D/DHX9/SEH1L/POLR2E/PPA

BL1/TNFAIP3/RPS7/BAG2/RPL5/TRIM21/IVNS1ABP/UBR5/GLMN/PRMT3/CAV1/PARP10/HDAC8/RP

/MRPS17/MRPS21/MRPS15/MRPL18/RCC1L/WARS2/MRPL37/RPUSD3/NSUN4/MRPL27/MRPL28/MTER  
3/RACK1/NSF/GGA1/CSK/DNM2/SYS1/VPS35/ARFRP1/OPTN/GGA3/RAB11A/GOLPH3L/ARF5/SNX17

/SLC11A1/RAB20/ATP6V1E1/CLN6/SLC4A3/SLC4A11/ATP6V0C/ATP6V0E1/SLC9A7/TMEM199/ATP

AS3/CCR1/LILRB4/FADD/ZNF675/CCL3/PTPN2/CASP8/TMEM64/INHA/KITLG/NOTCH2/HAX1/INPP

LR8/IFNG/RELA/LILRB1/C1QBP/CD40/SLAMF1  
T1/ADORA2B/TLR7

NDC1/TBC1D10C/TBC1D22A/TBC1D7/SGSM3/TBC1D22B/ADPRH/RAPGEF1/EPHA2/SGSM1/EVI5L/RA  
OBEC3D/TNIP1/TRIM25/SRPK1/MAVS/OAS3/TRIM21/IFITM3/SNX3/CCL8/HMGA2/PARP10/MORC2/

WDR45B/MAP1LC3B/BAG3/VPS18/PIP4K2C/NAGPA/RALB/TMEM199/PACS2/VMP1/HPS1/NPRL3/ATG

RRT/HENMT1/POLR2L/NUP155/DROSHA/AGO2/NUP107/NCOR2/POLR2K/TRIM71/SEC13/TSN/TARBP  
PSMD1/PSMA7/PSMB3/PSMD4/PSMD3/PSMD7/PSMD8/PSMA1/PSMB5/PSMA4/PSMD9

CASP8/BNIP3L/YWHAG/TFDP1/TMEM102

ICDL2/RHOT2/COPG2/BICD1/AP3B1/SNAPIN/UXT/HTT/ACTR1A/RAB1A/KIF3A/LRP4/KIF5B/TR

B3/P2RX5/SRI/CXCL9/MCU/LYN/LCK/PTPN6/RASA3/PML/ER01A/CXCL11/FAM155B/CCR5/MY05A/

PAM/FABP1/CAT/APOB/ACSL1/APOC1/INSIG1/ANG/APOA2/APOH/PCK2/GPLD1/AADAC/RGN/THRSP  
BCB4/SLC6A1/CYP4F2/AGXT/CYP4A11/AQP9

/SLC51B/ZC3H12A/BCAP31/UBE2J2/NPEPPS/HCLS1/ITGB1BP1/IL1B/CDK5/UBE2L3/GSK3A/BAG3  
LA-E/NOD2/LILRB1/DDX1/NLRP3/TICAM1/WNT5A/MALT1/HLA-G/GATA3

1/CARD16/CLEC7A/CARD18/CCL3/TNFAIP3/CD33/CASP8/S1PR3

LD1/HRAS/STK39/RAD51AP1/CDC25A/ANKRD1/CHEK1/HSF1/RHN01/RAB11FIP5/YBX3/BAX/CASP2  
LD1/HRAS/STK39/RAD51AP1/CDC25A/ANKRD1/CHEK1/HSF1/RHN01/RAB11FIP5/YBX3/BAX/CASP2

2D1/PSMD10/ARRB2/DCUN1D5/PELI1/PTTG1IP/PDCD6/TBC1D7/BCL10/MASTL/HSPA5/CHFR/NMI/

PA/KPNA4/CD4/HYAL2/SMAD3/DAG1

P5/PSME3/SLC9A3R1/DVL3/FERMT1/AXIN1/PSMB4/PSMB8/PSMB10/PSMA5/PSMD13/PSMC4/GSK3A  
/C12orf4/CD177/MAVS/STXBP1/ADORA2B/IL13RA2/CD84/BCR/ADGRE2/CCR2/DNASE1/PRAM1/HL

ITM3/CCL8/HMGA2/PARP10/MORC2/ZC3HAV1/SRPK2/IFITM2/MX1/VAPA/SETDB1/APOBEC3F/FAM1

C7L/SFSWAP/GEMIN2/SRSF1/SRPK2/CELF2/SNRNP200/GEMIN6/SMN2/LUC7L3/DDX1/SRSF10/PSI  
/BAD/CASP8/BNIP3L/YWHAG/TFDP1/TMEM102/NAIF1/THEM4/NMT1/FZD9/MUL1/TP53  
ME3/UBE2J2/NPEPPS/OTUB1/ANAPC7/SPSB1/CBFB/MYLIP/PSMB4/FBX032/RNF26/UBE2L3/PSMB8  
2/EZR/FZD7/NCF1/PRMT1/CARD9/DTNBP1/TRAF2/MAPKAPK2/PRDX1/SH2D3A/MAPK3/MAP2K2/PAK  
0/FSCN1/RHOC/ITGA5/IQGAP1/SLC9A1/EFNA5/PLEC/LAMC2/LAMA5/THY1/COR01C/CDH6/CDH11/  
S4/ACTG1/LYN/ACTB/FIBP/PTPN6

GTF2H1/TBP/POLR2E/ERCC3/TAF1B/PWP1/TTF1/POLR1C/ERCC2/ZMPSTE24/NOL11/ZNRD1  
L/SBNO2/MTF2/TRIM25/ILDR1/RARG/SLC25A5/PDCD10/HNRNPU/CTBP2/MRAS/SMARCA5/RNMT/MR  
L/SBNO2/MTF2/TRIM25/ILDR1/RARG/SLC25A5/PDCD10/HNRNPU/CTBP2/MRAS/SMARCA5/RNMT/MR  
BNIP3L/YWHAG/TFDP1/TMEM102  
/BCL10/MAVS/TLR2/TLR7/IL17D/PTPRC/TLR8/FFAR2/PARK7/HYAL2/ANXA1/TLR1/NOD2/AFAP1L

3

RAD51AP1/CDC25A/COL3A1/CDKN2D/CHEK1/HSF1/RHNO1/NABP2/BAX/FANCG/OPN1SW/BRSK1/PRK  
IB3/AURKA/GAPDH/RIPK2/IGF2BP2/DTL/YWHAZ/GPC3/FLNA/RBM38/HK2/PFKFB4/PRKCD/DRAM1/  
EC3B/FGA/TF/SERPINF2/ITIH3/SERPINA4/APOH/ALB/IGF2/KNG1/A1BG/APOA1/PLG/AHSG/SPP2  
APOA5/SLC2A2  
/HIBCH/PPARA/LPIN2/ACAD11/AIG1/ACACB/CPT1A/ECHS1/HADH/MCEE/ACADS/NUDT7/IDNK/CYP  
PBB1/DMAP1/CTBP1/MORF4L1/EP400/TADA3/TRRAP/NAA60/IRF4/NAA50/ZMPSTE24/IWS1/PHF20  
1/TRMT1/KMT5A/EHMT2/TRMT61A/MTA2/DNMT3A/TRMT112/NSUN5/TRMT6/PARP1/SMARCB1/SMYD3  
/MAPK3/IL27RA/TNFRSF4/SOCS1/CD58/IRF3/F2RL1/SERPINB1/ZC3H12A/FERMT1/FRMD8/LYN/I  
DMD/ARRB2/APP/HK1/CARD16/CLEC7A/CARD18/CCL3/TNFAIP3/CD33/CASP8/S1PR3  
F1/PAM/SNX10/JAG2/HDAC2/SSUH2/TNC/TGFB2/FGFR2/TGFB3/CNNM4/MY05A/MSX1/TFAP2A/NF2  
RRT/HENMT1/POLR2L/NUP155/DROSHA/AGO2/NUP107/NCOR2/POLR2K/TRIM71/SEC13/TSN/TARBP  
PTHLH/ASPM/COL3A1/CRMP1/LINGO1/SEMA4A/MAP2/EFNA5/TRIM11/PAK1/ADGRG1/THY1/COR01C  
PSMD4/PSMD3/RBX1/PSMD7/RNF7/CUL4B/PSMD8/PSMA1/PSMB5/PSMA4/PSMD9/FBXW5/PSMC3/PSM  
DBH/CYP2J2/CYP2A13/SULT1B1/FMO4/RIDA/CAT/HGD/SDS/AASS/ALDH2/CYP3A5/BDH1/PCK2/PI  
NCRIP/ELAVL1/PAIP1/TARDBP

FUCA2/TNFRSF4/ITGB5/TRIM59/NPC1/PPIA/DYNLT1/RPSA/TRIM31/CD209/ITGA2/XPR1/GRB2/V

FUCA2/TNFRSF4/ITGB5/TRIM59/NPC1/PPIA/DYNLT1/RPSA/TRIM31/CD209/ITGA2/XPR1/GRB2/V  
FUCA2/TNFRSF4/ITGB5/TRIM59/NPC1/PPIA/DYNLT1/RPSA/TRIM31/CD209/ITGA2/XPR1/GRB2/V  
FUCA2/TNFRSF4/ITGB5/TRIM59/NPC1/PPIA/DYNLT1/RPSA/TRIM31/CD209/ITGA2/XPR1/GRB2/V

PD/HNRNPC/SYNCRIP/ELAVL1/PAIP1/TARDBP/PARN

1/CCR3/FCMR/PRF1/RELA/CCR2

1/TMEM102

2/PGK1/SIRT6/NUP210/FOXK1/HIF1A/NUPR1/CYC1/HK3/TPI1/FOXK2/CAD/NUP93/NUP205/NUP3

/POLR2K/SPRY4/DSTYK/CBL/TRIM71/HNRNPM/WNT4/PTBP1/THBS1/SULF2/HNRNPA1/POLR2I/POL

/IGF2BP2/YWHAZ/RBM38/HK2/PFKFB4/PRKCD/DRAM1/HSPB1/QSOX1/ABCD1/IGF2BP1/ADAM9/MTM  
1/GSTZ1/HOGA1/TST/AADAT/IVD/QDPR/GOT2/ACMSD/GCDH/ACAT1/TDO2/KMO/ALDH7A1/CSAD/GP

/DGAT2/APOC4/ANGPTL4/ACSM3/LIPC/ASGR2/MLXIPL/PLA2G12B/CYP39A1/MTPP/APOB/ABCG8/E  
1/SLC1A2/SLC6A12/THRSP/SLC38A4/SLC13A5/SLC27A5/AQP9  
1/SLC1A2/SLC6A12/THRSP/SLC38A4/SLC13A5/SLC27A5/AQP9  
EMA5B/SEMA3C/SEMA3E/MAPT/ABL1/DBNL/DNM2/VEGFA/RAB11A/IFRD1/CDK5R1/SRF/ADNP/RYK/

TN2/NDE1/CKAP5/FBXW5/TRIM37/CENPJ/SASS6/RBM14

A1/B4GALT5/NEU1/GM2A/GLTP/CERS5/PPP2R1A/B3GNT5/GBGT1/SMPD2/NSMAF/DEGS1/ORMDL2/B

SF18/AREG/CCL5/ITGA5/MIF/IQGAP1/EFNA5/CD3E/TGFA/RELN/NCAPG2/FGFR3/HDAC2/HCLS1/L

1/BCL3/LAG3/CARD11/IL1B/ASB1/APP/CLEC7A/LBP/BCL10/THBS1/NMI/GLMN/INHA/SIGIRR/ER  
/GABRR3/SLC26A11/SLC37A2/XPR1/SLC4A11/BEST1/TTYH2/SLC12A7/SLC26A2/GABRD/TTYH1/C

PPP1R7/CALM3/PTPRC/PIN1/PPP1R12A/PPP2R5D/CNEP1R1/LILRB2/DUSP26  
PN1/MAP3K10/DAXX/CCL19/MAP4K1/MAP4K2/DAB2IP/MAP3K7/MAP3K9/MAP3K11/MUL1/MAP3K12/  
L3/SLC11A1/IL12RB1/IL4R/GPR183/FCGR2B/PTGER4/TMEM98/CCL19/ITGAL/ATP7A/CLEC4E/LO

MC03/SLC9A3R1/ATP6V1H/SLC36A1/ATP6V1E1/SLC4A11/SLC15A3/ATP6V0C/ATP6V0E1/SLC9A7/  
MC1/CTNND2/MICALL2/S100A10/FSCN1/RHOC/ITGA5/IQGAP1/SLC9A1/EFNA5/PLEC/LAMC2/PERP

1/WWP2/HIF1AN/DLK2

1CC/CPSF6/XPO5/BARD1/BAG3/KHDRBS1/PK1A/EMD/MAVS/ZPR1/UBR5/ANP32B/DHX9/DMAP1/EFC

IF/SLC34A2/TGFB1/DKK1/ADA/FOLR1/CMTM3/MAFG/VASP/ARNT2/ELF3/SMG9/PLCD3/FZD6/TCOF  
TH4/ROBO1/TRIP10/HRAS/NUP62/GMIP/FGD3/COL3A1/RHOG/RHOQ/ARHGEF39/TIMP2/RHOC/PLEK

1/MFNG/LFNG/ABL1/SPPL3/NVL/TRAF4/STK3/CAV1/PKD1/BMP2/ADD1/PIN1/STK4/RPL11/EPB41  
/BAX/HIF1A/TCIRG1/SUCO/ATP6AP1/MMP2/UBASH3B/NOL3/TNFRSF11A/TGM2/SNX10/ADAM8/CAP  
AIP3/NOTCH1/VEGFA/MESP1/TWIST1/SIX1/RBPJ

/CCL2/CXCL13/ITGB1BP1/KDM5B/FIBP/FGFR2/PRKD2/GRB2/POLR2L/POLR2K/SPRY4/DSTYK/CBL  
AC2/PHLDB1/JAG1/IL1B/LOXL2/TGFB2/FGFR2/HNRNPAB/SDHAF2/TGFB3/HEY1/MSX1/PDCD6/WNT  
A/PML/PARP1/CRIP1/TIPIN/GPX1/MSH2/RUVBL2/USP1/UBE2A/HMG1/CARD16/CUL4B/POLD3/NF

DGAT2/PPP1R3B/PPARGC1A/KHK/MST1/LEPR/PFKFB1/RORC/GPLD1/RGN/FBP1/IGF2/PDK4/GCGR/  
SULT4A1/ACOT1/ACOT2/ENPP1/ACACB/CBR4/SUCLG2/MCEE/NUDT7/ELOVL2/SULT1E1/GSTZ1/AAD  
SULT4A1/ACOT1/ACOT2/ENPP1/ACACB/CBR4/SUCLG2/MCEE/NUDT7/ELOVL2/SULT1E1/GSTZ1/AAD  
SULT4A1/ACOT1/ACOT2/ENPP1/ACACB/CBR4/SUCLG2/MCEE/NUDT7/ELOVL2/SULT1E1/GSTZ1/AAD  
BB/DBH/FGB/ADRB2/FGG/FGA/EPHX2/SERPINF2/KNG1/CPS1

/GPLD1/LCAT/APOA1/APOA5/APOC3

/CPS1/PCK1/AQP9

BB/DBH/FGB/ADRB2/FGG/FGA/EPHX2/SERPINF2/KNG1/CPS1

FGA/F2/F11/TMPRSS6/F7/SERPINF2/APOH/CPB2/KLKB1/ABAT/F12/KNG1/PLG/HRG/SERPINC1

BB/DBH/FGB/ADRB2/FGG/FGA/EPHX2/SERPINF2/KNG1/CPS1

CB4/PON1/APOA1/CYP4F2/APOA5/APOC3/CYP4A11

MT6/ASF1A/SUPT6H/KDM3A

B4GALT3/B3GALNT1/ST3GAL4/ASA1/CLN3/GBA/CLN6/FA2H/SMPD4/A4GALT/PIGC/ST3GAL5/PIG

210/FOXK1/HIF1A/NUPR1/CYC1/HK3/TPI1/FOXK2/NUP93/NUP205/NUP37/DDIT4/GPI/NDC1/NUP

SERPINE2/CSF1/LRP12/TGFB1/ARHGAP4/PPT1/STC2/PSRC1/TNFRSF12A/KRT17/GPC3/GDF15/AG  
BLN1/GSTP1/CD44/CD74/DUSP5/ARHGEF2/BCL2A1/PRKCD/HSPB1/PRNP/PLEK/APLP1/NUP62/TMS

PSF3/POP5/TSN/UTP20/NOB1/TSEN34/TSEN15/RNASEK/NOL9/UTP23/RPP30/RNASEH1/SND1/DBR

RPS7/BAG2/RPL5/IVNS1ABP/UBR5/GLMN/PRMT3/CAV1/PARP10/HDAC8/RPL11/NXN/PARK7

GFR2/TBX19/COL4A2/LAMB3/HSBP1/NF2/COL11A1/ACVR1/SFRP2/TWSG1/POFUT2  
P2A/CHMP7/CHMP5

H/CYP4V2/RDH5/APOB/CYP1A1/APOA2/ALDH8A1/CYP3A5/RBP4/ADH6/RDH16/CYP1A2/TTR/APOA1  
CYP4F12/SHMT1/CYP27A1/CYB5A/TTPA/HAAO/ALDH1L1/CYP1A1/MTHFD1/RGN/AOX1/CYP4F2/CYP

BB/DBH/FGB/ADRB2/FGG/FGA/EPHX2/SERPINF2/KNG1/CPS1

HJ1/VPS25/HOOK2/RAB11A/VPS37B/VPS11/IST1/SNX3/PI4K2A/VPS4A/STAM/TMCC1/RAB22A/AN

6/NUP210/FOXK1/HIF1A/NUPR1/CYC1/HK3/TPI1/FOXK2/CAD/NUP93/NUP205/NUP37/DDIT4/GPI  
TLA4/PLA2G2D/ZC3H12A/LAG3/CCL28/CBFB/IL2RA/PTPN6/IL4R/PELI1/BTN2A2/FCGR2B/TWSG1  
NAP1L2/SET/SMARCB1/RUVBL2/POLE4/USP22/JADE2/KAT2A/BEND3/PCGF2/DR1/DPF2/TAF12/TA  
EREG/EGF/ANAPC4  
S6/NFKBID/ARG2/TP53/WNT5A/CD274/FASLG

/CEP131/PRKCD/SCAMP5/B3GAT3/PRNP/ADAM9/HRAS/SYK/GTSE1/CSF1R/EZR/ANKRD1/VTCN1/RA  
MELTF/LOXL4/FBLN1/P3H4/TGFB1/ITGAM/CTSV/COL1A2/COL9A2/CD44/ITGB2/AGRN/QSOX1/VCA



14L2/CYP7A1

/CUL4B/POLD3/NFATC4/ERCC1/C9orf116

TAOK1/WNT5A/MAPK8IP3

SX1/MYBBP1A/PTTG1IP/RPS7/CHEK2

B4GALT5/IL34/MAPK3/BIN1/HDAC1/RELN/S100B/LEF1/MYRF/MT3/HDAC2/LYN/CNTNAP1/MXRA8/

GFR1/FBX05/KIF14/DEFB1/KDM1A/CBFB/CDKN1C/GLDN/IL15/PTBP3/APP/GAL/AXL/BTK/CLEC7A

L/CCDC88A/TCHP/DYNC2LI1/CEP97/MAPK15/ATG3/IFT140/CNTR0B/CEP135

C3H12A/BCL3/NCKAP1L/HSPH1/CBFB/IL12RB1/IL15/IL4R/PNP/AP3D1/RASAL3/GPR183/ABL1/P  
AS4/ERCC1/UIMC1/RNF8/UBE2N/TP53BP1/HMGA2/DCLRE1C/TFIP11/LIG3/XRCC5/KAT5/SETMAR/

/CCL2/CXCL13/ITGB1BP1/TNC/KDM5B/FIBP/FGFR2/PRKD2/GRB2/POLR2L/POLR2K/SPRY4/DSTYK  
AF9/GSK3A/PML/USP14/PSMD10/SMARCC1/RBX1/RPL23/RACK1/UBXN1/VCP/USP5/UBQLN4/RPS7/

MP14/LIF/SLC34A2/TGFB1/DKK1/ADA/FOLR1/CMTM3/MAFG/VASP/ARNT2/ELF3/SMG9/PLCD3/FZD  
T/ST3GAL5/ITGB8/PSAP/UGCG/HEXB

TS2/PSMB2/SFRP5/PSME3/SLC9A3R1/DVL3/FERMT1/AXIN1/PSMB4/PSMB8/PSMB10/PSMA5/PSMD1  
CN1/GRN/VSIG4/JAK3/HMOX1/CD86/CD300A/MNDA/UBASH3B/SOCS1/IRF1/CTLA4/PLA2G2D/C1QT

210/FOXK1/HIF1A/NUPR1/CYC1/HK3/TPI1/FOXK2/NUP93/NUP205/NUP37/DDIT4/GPI/NDC1/NUP

D1/GAL3ST1/STK26/FOLR1/PMEPA1/AGTRAP/ZDHHC13/CD74/CYTH4/QSOX1/SCAMP5/IL15RA/HLA RC1/CHAF1B/P3H4/RAD51/TONSL/AURKA/SPI1/NCAPD2/UHRF1/MCM6/TUBG1/FEN1/NCAPH/GINS2 BP5/AKR1B1/CKAP4/PYGB/PPT1/CTSV/ADA/HLA-DMA/GPC4/MPZ/STX3/SQSTM1/GPC3/AGRN/SDC3 CB1/RAD51AP1/RCC1/EZH2/EXOSC4/CDK4/DNMT1/MUC1/EME1/ZNF385A/MAGED1/HMGB3/CREB3L1 CDK1/NDC80/HJURP/NCAPG/MCM2/CDC45/NEK2/GINS1/BUB1/BUB1B/MKI67/MCM4/ZWINT/ORC6/C 2/ORC1/MAGEC2/RPP25/NUSAP1/ARL2/P3H4/CENPH/TRAIP/RAD51/PNMA1/RCC2/TXNRD1/SPC24/ BP5/AKR1B1/CKAP4/PYGB/PPT1/CTSV/ADA/HLA-DMA/GPC4/MPZ/STX3/SQSTM1/GPC3/AGRN/SDC3 A-DQA1/HLA-DRA/STARD3NL/CTSA/HLA-DQB1/TRPM2/GRN/CYB561/HLA-DPA1/HLA-DMB/TPCN1/A BP5/AKR1B1/CKAP4/PYGB/PPT1/CTSV/ADA/HLA-DMA/GPC4/MPZ/STX3/SQSTM1/GPC3/AGRN/SDC3 ENPF/MISP/ARL2/CCNF/AURKA/UNC119/HMMR/MARCKS/DTL/CEP131/TUBG1/CCDC88B/RELB/SPAT B/BUB1B/KIF23/NDRG1/WDR62/CCNE1/CENPF/KIFC1/RPP25/MISP/ARL2/CCNF/RAD51/AURKA/UN 62/CENPF/KIFC1/KIF18B/MISP/ECT2/NUSAP1/TTK/SKA1/RCC2/AURKA/UNC119/PSRC1/SKA3/MA MP14/MPZL1/MISP/POF1B/PDLIM7/ARL2/FLNC/ENAH/MARCKS/YWHAZ/FLNA/CD44/ITGB2/CIB2/T /HLA-DRB1/PLEKHB2/TSPAN15/LAMP5/RAB31/HLA-DQA1/ABHD17C/MTMR2/PRAF2/HLA-DRA/STAR /CKAP4/ITGAM/GPNMB/STK26/CYBB/CORO1A/FOLR1/STX3/AGTRAP/CD44/FCH01/ITGB2/ALDH3B1 CIB2/TPM4/TAX1BP3/COTL1/FERMT3/ARHGEF2/BAIAP2L2/VASP/HCK/FHL3/ZYX/LAD1/TWF2/ASA NRPN/LAGE3/FANCD2/ELF4/OIP5/PLCB1/ALYREF/CLIC3/ESRP1/GTF3C6/HSF1/GLIS2/AP5Z1/CA A-DQA1/MTMR2/NRGN/HCK/UNC13D/HLA-DRA/YKT6/SYNGR2/HLA-DQB1/RAB11FIP5/GIPC1/HLA-D 1A1/FCER1G/HILPDA/REG1A/VEGFB/TMC6/ITPR3/TIMP1/LHFPL2/NUDT1/NCS1/LGALS3/PLAUR/P TGAM/GPNMB/CYBB/CORO1A/FOLR1/STX3/AGTRAP/CD44/FCH01/ITGB2/ALDH3B1/SNAP25/ZDHHC1 APG/MCM2/CDC45/NEK2/GINS1/BUB1/BUB1B/MCM4/ZWINT/ORC6/CENPF/RFC4/ORC1/CHAF1B/P3H SULF1/B4GALNT1/MMP11/MMP14/PCSK1N/CLSTN1/HID1/PODXL2/GAL3ST1/TGFB1/STK26/FOLR1/ DMA/GPC4/GPC3/AGRN/SDC3/CD74/P2RX4/PRKCD/DRAM1/VCAN/HLA-DRB1/VAT1/ABCD1/LAMP5/H /HLA-DRB1/PLEKHB2/TSPAN15/LAMP5/RAB31/HLA-DQA1/ABHD17C/MTMR2/PRAF2/HLA-DRA/STAR AD51/TONSL/AURKA/SPI1/NCAPD2/UHRF1/MCM6/FEN1/NCAPH/GINS2/MCM10/SMARCD3/POLD1/MC SF1/AKR1B1/S100A14/CKAP4/TRAIP/RAD51/AURKA/STC2/STK26/CYBB/GAPDH/CDC25C/ANKRD13 MP14/MPZL1/DSG2/MISP/POF1B/PDLIM7/ARL2/FLNC/ENAH/MARCKS/YWHAZ/FLNA/CD44/ITGB2/C B4GALNT1/PCSK1N/CLSTN1/HID1/GAL3ST1/STK26/FOLR1/PMEPA1/AGTRAP/SNAP25/ZDHHC13/CD A-DQA1/HLA-DRA/STARD3NL/CTSA/HLA-DQB1/TRPM2/GRN/CYB561/HLA-DPA1/HLA-DMB/TPCN1/A /MICAL1/SRC/PRC1/KIF23/KRT23/TUBA1B/NDRG1/RAC2/LMNB2/TUBA3C/DNM1/KIFC1/KIF18B/M /MICAL1/SRC/PRC1/KIF23/KRT23/TUBA1B/NDRG1/RAC2/LMNB2/TUBA3C/DNM1/KIFC1/KIF18B/M 1A1/FCER1G/HILPDA/REG1A/VEGFB/TMC6/ITPR3/TIMP1/LHFPL2/NUDT1/NCS1/LGALS3/PLAUR/D /MICAL1/SRC/PRC1/KIF23/KRT23/TUBA1B/NDRG1/RAC2/LMNB2/TUBA3C/DNM1/KIFC1/KIF18B/M DRG1/RAC2/LMNB2/TUBA3C/DNM1/KIFC1/KIF18B/MISP/HID1/POF1B/PDLIM7/NUSAP1/SKA1/LMN PKP3/NOP56/RALY/RPL8/SNRPD2/HSF1/APOBEC3C/SNRPD1/NROB1/SNRPA1/SNRPA/IQGAP1/MRTO SMARCD1/HMGB2/TCF3/TRIM28/BRMS1/SIRT6/RUVBL1/HIF1A/CBX1/CHD3/MCRS1/CHAF1A/SMARC B/MISP/HID1/NUSAP1/SKA1/RCC2/ARHGAP4/AURKA/PSRC1/CLIP2/SKA3/TTLL4/RASSF3/TUBG1/ ENAH/MARCKS/YWHAZ/FLNA/CD44/ITGB2/CIB2/TPM4/ARHGEF2/HSPB1/ITGAV/VASP/ADAM9/CDC4 ENAH/MARCKS/YWHAZ/FLNA/CD44/ITGB2/TPM4/ARHGEF2/HSPB1/ITGAV/VASP/ADAM9/CDC42EP1/ ENAH/MARCKS/YWHAZ/FLNA/CD44/ITGB2/CIB2/TPM4/ARHGEF2/HSPB1/ITGAV/VASP/ADAM9/CDC4 PTAFR/ITGAV/RAB31/CD109/BSG/TRPM2/RHOG/CD53/PLAU/ABCC4/ATAD3B/SYNGR1/DNAJC5/DDO EKH01/TUBG1/KCNJ11/ARHGEF2/ITGAV/IGF2BP1/NME1/VASP/ADORA1/PLEK/LAMP5/FGD3/NME2/ /ZWINT/CENPF/ORC1/CENPH/TTK/SKA1/RAD51/RCC2/AURKA/SPC24/NCAPD2/SKA3/SPC25/MCM6/ A-DQA1/MTMR2/ATP6V1F/HLA-DRA/STARD3NL/CTSA/HLA-DQB1/TRPM2/GRN/CYB561/ATP6VOB/HL 7/RPL28/MRPS34/RPL39/RPL35A/MRPL13/GCN1/RPS3/RPL27/EIF3H/RPL35/RPS20/RPL18A/RPS /HSPA8/RPL36A/CCT2/RPS2/PLCB3/CCT4/BLOC1S4/RPL17/RPLP2/RPSA/CCT7/RPL10L/RPS5/PF 4/CENPH/SKA1/RAD51/AURKA/SPC24/NCAPD2/SKA3/SPC25/TUBG1/CENPW/NCAPH/FANCD2/RCC1/

1/WASF2/APBB1IP/FLOT2/SLC9A1/DGKZ/PAK1/COR01C/PALLD/SLC39A6/ARPC2/PPP1R9B/ARPC3  
/SKA1/RCC2/AURKA/SPC24/NCAPD2/SKA3/SPC25/CENPW/DSCC1/OIP5/SPAG5/CENPO/MAD2L1/DN  
NRPF/LSM7/U2AF2/SF3B5/SNRPC/BUD31/SNRNP40/PPIL1/RBMX2/LSM2/ISY1/RNF113A/EIF4A3/  
L39/RPL35A/MRPL13/RPS3/RPL27/RPL35/RPS20/RPL18A/RPS19/RPLP0/RPL18/RPL23/RACK1/M  
/PLEKH02/MIF/CD300A/CANT1/CFD/FTH1/PSMD2/ITGAX/HSPA8/TCIRG1/DOK3/FPR1/MNDA/GYG1  
Z/CTSA/IFI30/TUBB4B/GRN/CTSK/TCN2/EPDR1/HSPA8/NEU1/GM2A/FUCA2/STK11IP/RNASET2/M  
/NUP62/SPAG5/MAD2L1/ASPM/CKAP2L/HSF1/TMEM201/FAM83D/MTCL1/RGS14/NPM1/SGO1/SPDL1  
SCN1/WASF2/ITGA5/PDE4A/IQGAP1/LCP1/PAK1/COR01C/PALLD/PPP1R9B/WIPF1/S100B/SH2B2/  
C1/RACGAP1/SHCBP1/PKN1/NUP62/SPAG5/ASPM/RAN/CRMP1/DTNBP1/CHMP4B/CCDC124/MTCL1/I  
D3B/CHIT1/TIMP2/CD300A/CANT1/FTH1/STXBP2/ITGAX/TCIRG1/DOK3/FPR1/RAP2B/SIRPA/CD5  
ST/STXBP2/GM2A/FUCA2/CD63/STK11IP/RNASET2/FPR1/MNDA/PTGES2/CCT2/C3AR1/DYNC1H1/N  
MAP2/MAP1S/CENPE/PEA15/KLC3/DYNLRB1/DYNLL1/DYNC1H1/KIFC2/DYNLT1/HAUS1/KIF14/DCT  
ST/STXBP2/GM2A/FUCA2/CD63/STK11IP/RNASET2/FPR1/MNDA/PTGES2/CCT2/C3AR1/DYNC1H1/N  
E2/PCNA/XRCC3/PPP1CA/CBX3/BLM/NHP2/CDK2/KDM1A/SSB/THOC5/PPP1CC/SIRT7/PML/PARP1/  
/HLA-A/ITGB5/STX6/RAB7B/ACTG1/ADAM8/SLC11A1/RAB20/ANXA11/WAS/RAB10/ATP6VOC/HLA-  
PC25/CENPW/SPAG5/CENPO/MAD2L1/CENPU/HSF1/KIF18A/RANGAP1/SGO2/CENPE/SGO1/DYNLL1/  
/HSPA8/MNDA/GYG1/HK3/HSP90AB1/ILF2/AMPD3/GPI/PIPA/ACLY/DYNLT1/CAPN1/C1orf35/ASA  
A/RPLP0/RPL18/RPL23/MRPL10/RPL38/MRPL52/RPL23A/MRPL48/MRPL53/MPV17L2/RPL7A/RPL5  
4/NCAPD2/SKA3/SPC25/CENPW/SPAG5/CENPO/MAD2L1/CENPU/HSF1/RANGAP1/SGO2/CENPE/SGO1  
D/GAS7/TIGD5/ARPC3/WIPF1/MARK2/PDLIM3/SH2B2/COR01B/ACTG1/DAPK3/HCLS1/PSTPIP1/RA  
/SPAG5/CENPO/MAD2L1/CENPU/HSF1/RANGAP1/SGO2/CENPE/SGO1/SPDL1/KNTC1/ERCC6L/NUP37  
/NHP2/KDM1A/SSB/THOC5/PPP1CC/SIRT7/PML/PARP1/THOC6/MSH2/CBX5/XRCC6/TEL02/NABP1/  
A/TGFA/COPE/VMA21/HLA-DQA2/KDEL1/HLA-DRB5/COPZ1/CLTB/NCALD/HLA-B/AP1G2/CSPG5/C  
2/PRDX1/SLC1A4/HSPA8/CD63/ANKRD27/HSP90AB1/RAB35/CCT4/SLC3A2/FLOT1/SYTL1/RAC1/A  
2/PRDX1/SLC1A4/HSPA8/CD63/ANKRD27/HSP90AB1/RAB35/CCT4/SLC3A2/FLOT1/SYTL1/RAC1/A  
/RPLP0/RPL18/RPL23/RACK1/RPL38/RPL23A/MCTS1/RPS7/RPL7A/RPS23/RPS10/RPS15/RPS16/  
/ASPM/DCDC2/CDC7/CKAP2L/HSF1/KIF18A/RANGAP1/YEATS2/ESPL1/FAM83D/CENPE/DYNLL1/AG  
NPC2/PLBD2/ASA1/GBA/CTSS/GNS/GALNS/BGN/LUM/CTSD/CSPG5/HPSE/CSPG4/SGSH/PSAP/HSP  
1/RRS1/INCENP/BLM/RSPH1/CENPK/DSN1/KMT5C/CENPB/CHMP1A/TOBP1/RAD21/NIFK/RAD9A/H  
/LSM2/ISY1/RNF113A/EIF4A3/PRPF3/SNU13/PRPF6/SF3A3/CWC27/SNRPG/PRPF31/SNRPB2/PRP  
ES2/CCT2/DYNC1H1/NPC2/PA2G4/ACLY/CAP1/RNASE2/GNS/FTL/GALNS/DSN1/PSMD1/PADI2/TRA  
/DDX41/SF3A3/CWC27/SNRPG/HNRNPM/HNRNPA3/SNRPB2/PRPF19/SART1/DDX23/HNRNPU/MAGOH/  
3/MSR1/GLDN/COL6A2/LOX/LUM/COL4A2/COL8A2/EMILIN1/COL11A1/EMID1/COL9A3/C1QTNF6  
0/RBMX2/LSM2/PRPF3/SNU13/PRPF6/SF3A3/SNRPG/PRPF31/SNRPB2/SART1/PHF5A/DDX23/HTAT  
A1/CD47/NRAS/SERPINB6/ATP6VOC/TMEM63A/GPR84/LAIR1/CYSTM1/CLEC5A/KCNAB2/VAMP8/CD  
/LSM2/PRPF3/SNU13/PRPF6/SF3A3/SNRPG/PRPF31/SNRPB2/SART1/PHF5A/DDX23/HTATSF1/LSM  
3/PPAN/NOC4L/RRP7BP/UTP11/LAS1L/UTP4/UTP6/HEATR1/KRI1/RPS7/NOL6/LTV1/UTP20/NOB1  
N/TIPIN/POLA1/PRIM2/RPA2/POLD3/TIMELESS/PRPF19/RAD51C/RAD51D/NBN/RAD18/RFC5/SMA  
RPL5/RPL6/RPL37/RPL27A/RPL36/UBA52/RPL19/RPL22L1/RPL13A/RPL37A/RPLP1/RPL32/RPL3  
PRPF3/SNU13/PRPF6/SF3A3/SNRPG/PRPF31/SNRPB2/SART1/PHF5A/DDX23/HTATSF1/LSM8/SART  
CSNK1D/TUBG2/KIF2A/CALM2/BOD1/CCSAP/HNRNPU/RAB11A/KLHL21/CLTC  
/NCAPH2/KLHDC8B/PRKCI/DNAJC8

SF3A3/CWC27/SNRPG/PRPF31/SNRPB2/SART1/PHF5A/PRPF38A/LSM8/SF3B3/SF3B2/MFAP1/PRPF  
SF3A3/CWC27/SNRPG/PRPF31/SNRPB2/SART1/PHF5A/PRPF38A/LSM8/SF3B3/SF3B2/MFAP1/PRPF

/GPNMB/DKK1/HLA-DMA/HAVCR2/CORO1A/SLC39A4/FOLR1/PMEPA1/SQSTM1/ANKRD13D/IRAK1/TU  
/MCM3/EZH2/CDK4/TUSC3/DPM2/CDKN2D/SNRPD2/PRMT1/WDR4/TRAF2/RBCK1/YEATS2/FBXL19/S  
/DNAJC5/CANT1/STXBP2/NEU1/SLPI/RAP2B/DEGS1/C3AR1/ILF2/OLR1/SLC2A5/ADAM8/KPNB1/A  
/LAMTOR1/CD47/AGPAT2/SLC44A2/TMEM63A/STK10/GPR84/LAIR1/CLEC5A/KCNAB2/HVCN1/VAMP  
L/UBA1/KMT5C/CENPB/UBE2A/BEND3/CBX5/CBX8/HELLS/PCGF2/ESCO2/MBD3/RNF2/MECP2/BAZ2  
TOR1/SERPINB6/DYNC1LI1/ATP6VOC/TBC1D10C/AP2A2/ATP6AP2/SLC2A3/RHOA/COPB1  
1/RPL24/RPL11/RPL10A/RPS28/PNPT1/RPL31/NUFIP2/BTF3

4/SNRPD3/SNRNP200

4/SNRPD3/SNRNP200

KRT8/ATN1/XPOT/AKAP8L/SFPQ/DNMT3A/PML/NSMF/RUVBL2/POLA1/CHMP1A/NUP107/NCOR2/TEL

3/UXS1/B4GALT7/B4GALT2/FUT3/CIT/GOLGA3/FUT2/FUT6/LLGL1/CHPF/OCRL/NAGPA/VRK1/B4G  
HMP4C/HGS/NPC1/RAB7B/CD68/LAMP3/SNF8/SLC11A1/HLA-DRB5/LAMTOR5/LAMTOR1/TMEM9/CHM  
RG1/LARP4B/PSMA1/RPL7A/RPS23/RPS4X/RPL6/RPL36/HSPA14/RPL19/DHX9/RPL32/RPL30/LAR  
6V0E1/CALR/OCRL/STX4/ATP6VOD1/HVCN1/VAMP8/DNM2/DMBT1/TLR2/ANXA3/HLA-F/RAPGEF1/T

L11A1

/CDC23/BCOR/ANAPC15/CUL7/CDC16/CDC26/ANAPC1/PCGF1/BRCC3/PHC1

RCA5/RPA1/SMARCA1/MMS22L

3/CANX/HLA-F/TAPBP

3/CANX/HLA-F/TAPBP

TRIM28/PRKDC/HIF1A/PYG02/BCL9/TAF6/RBL1/CD3EAP/RCOR2/HSP90AB1/E2F8/HDAC1/E2F3/S  
DORA1/PLEK/LAMP5/MAPRE1/ASAP1/EZR/SLC26A6/PLEK2/CFL1/FSCN1/ITGA5/TCTN2/OPN1SW/M

KCNJ11/P2RX4/TOR4A/IL15RA/SCRN1/PRNP/MVP/PLCB1/NUP62/RCC1/TUBB/MX2/CDK4/MAD2L1/  
1/PDE9A/FGR/ARF4/RPS3/SPRY4/NF2/WWC1/DNM2/ADAM17/MYO6/PACSIN2/PACSIN1/TLN1/RHOA

G3/FHOD1/CNN2/TRIP6/PTK2/PDLIM4/MYL9/NEBL/ACTN1/LIMA1

B1/CLTA/HSPA8/HLA-DQB2/STX6/GPR107/TGFA/TMED9/CTLA4/SORT1/RAB35/HIP1R/BCAP31/HL

B1/CLTA/HSPA8/HLA-DQB2/HLA-A/TGFA/COPE/RAB35/VMA21/HIP1R/HLA-DQA2/FZD2/KDELRL1/H  
QB2/TGFA/RAB35/HIP1R/HLA-DQA2/FZD2/HLA-DRB5/NECAP2/CLTB/AP2M1/NCALD/GAD1/AP2S1/

OC3  
OC3

4

R1/DNAJC5/ARFGEF3/HLA-DPB1/CLTA/SYT8/HLA-DQB2/HLA-A/STX1A/STX6/RAB3B/ECE2/TGFA/  
OC3

PS18/AP1G2/AP3D1/AP1B1/COPG1/PDCD6/SEC13/COPG2/AP2A2/COPB2/AP3B1/CLTC/AP1S1/AP1  
PS18/AP1G2/AP3D1/AP1B1/COPG1/PDCD6/SEC13/COPG2/AP2A2/COPB2/AP3B1/CLTC/AP1S1/AP1

X2/ACOX2/BAAT/PIPOX/EHHADH/DAO/HAO2/HAO1/AGXT  
X2/ACOX2/BAAT/PIPOX/EHHADH/DAO/HAO2/HAO1/AGXT  
AP/B3GNT9/RRS1/RRP9/DDX11/RRP7A/POLR2H/FBL/EEF1D/NHP2/NOP58/UTP18/DEAF1/POP1/MA  
/VIM/KRT20/EPPK1

7/PSMB3/PSMD4/PSMD3/PSMD7/PSMD8/VCP/PSMA1/UBQLN4/PSMB5/PSMA4/PSMD9  
/ZFYVE19/MASTL/LIMA1/RAB11A/PLEKHG6/RHOA  
1/CNN2/MYO5A/WDR1/TRIP6/PTK2/PDLIM4/MYL9/NEBL/ACTN1/LIMA1  
/ASPH/EZR/DCDC2/RHOG/FMNL1/CFL1/RHOQ/GIPC1/EPB41L2/WIPF3/TRAF2/RHOC/FLOT2/CLTA/  
LTA/HLA-DQB2/HLA-A/TGFA/COPE/TMED9/SORT1/VMA21/HLA-DQA2/KDELRL1/HLA-DRB5/COPZ1/C  
IP1R/LASP1/FLOT1/CAP1/CAPZA1/RTKN/GYPC/HCLS1/ACTB/CTTN/MYADM/WAS/NSMF/RIMS3/LLG  
/TAF10/ERCC1/MYO6/GTF2E2/POLR2I/POLR2J/POLR2D/GTF2H1/TAF13/TBP/MMS19/POLR2E/GTF  
CAMP4/STX10/HLA-DQA2/HLA-DRB5/LLGL1/APP/AP1B1/ARFIP2/M6PR/CLIP3/SYS1/COG1/SCAMP

CAT/ACSL1/SLC27A2/DAO/FNDC5  
CAT/ACSL1/SLC27A2/DAO/FNDC5  
2/GM2A/MAP2K2/GNA12/GNGT1/PTPN7/PLEKHA4/LYN/GNG5/MIEN1/GNB1/FGR/LCK/RASA3/STAC3  
/TAF10/ERCC1/MYO6/GTF2E2/POLR2I/POLR2J/POLR2D/GTF2H1/TAF13/TBP/MMS19/POLR2E/GTF  
P2B1/AP2A1/VPS33A

5/VCP/WRAP53/UBQLN4/ACTR3/NBN/RAD18/RNF8/RPA1/SMARCAL1/TP53BP1/PHF1/SLFN11/HUS1  
L1/RAB34/NCF1/GIPC1/ATP6V0B/HLA-DPA1/ATP6V0D2/RAB32/COLEC12/FLOT2/HLA-DPB1/CLTA  
K1/THY1/COR01C/SLC39A6/GABRA3/PPP1R9B/PIP5K1C/HIP1R/FERMT1/MYO1G/ATF4/RAC1/PDE9  
UVBL2/POLA1/CHMP1A/NCOR2/RAD21/VIM/CXXC1/OGG1/HNRNPM/PHF5A/GHRHR/SRPK1/HAT1/HNR  
/TAF10/ERCC1/MYO6/GTF2E2/POLR2I/POLR2J/POLR2D/GTF2H1/TAF13/TBP/MMS19/POLR2E/GTF  
NDE1/NF2/SPIRE1/ZFYVE19/MASTL/LIMA1/RAB11A/PLEKHG6/RHOA  
7/PSMB3/PSMD4/PSMD3/PSMD7/PSMD8/VCP/PSMA1/UBQLN4/PSMB5/PSMA4/PSMD9

LA-DPB1/CLTA/TMEM165/HLA-DQB2/AP4M1/CHST1/STX6/SCAMP4/COR07/RAB7B/STX10/PL0D3/P  
NF2/SPIRE1/ZFYVE19/MASTL/LIMA1/RAB11A/PLEKHG6/RHOA

OLEC12/HLA-DPB1/HLA-DQB2/TCIRG1/HLA-A/RAB7B/HIP1R/STAB1/HLA-DQA2/FZD2/MSR1/SLC1

EHD2/RAP2A/RAB10/HLA-B/SLC9A7/CLIP3/VAMP8/SCAMP2/CFTR/PDLIM4/OPTN/PACSLN2/GGA3/

-DPA1/AREG/DNAJC5/HLA-DPB1/CLTA/HSPA8/HLA-DQB2/HLA-A/STX6/GPR107/TGFA/COPE/TMED  
B/FLNA/C1QC/SNAP25/CDK16/CPLX2/EIF4EBP1/SCGN/ARHGEF2/P2RX4/C1QA/NCK2/SCAMP5/SLC  
L1/FERMT3/PRKCD/TOR4A/SERPINI1/QSOX1/VAT1/MVP/UNC13D/TUBB/CSTB/TMSB4X/S100A8/LY  
/CLTB/AP2M1/DVL2/AP2S1/CEMIP/DNM2/MYO6/AP2A2/CLTC/AP2B1/HBEGF/AP2A1

5C/RUVBL2/RBBP4/CBX5/MTF2/PRDM4/RBBP7/CXXC1/LAS1L/SNRPG/E2F6/INO80C/PRPF31/ZNF3

D2BP2/DGKZ/HIF1A/VPS72/RNF34/BASP1/EFTUD2/PPIH/LMNA/DPP3/NXT1/NCAPG2/RNPS1/REXO  
NH1/PAG1/UNC5B/EZR/BSG/ARID3A/PGK1/KIF18A/RHOQ/S100A10/TRAF2/HMOX1/SELPLG/FLOT2  
6/PTK2/PDLIM4/MYL9/NEBL/ACTN1/LIMA1  
6/PTK2/PDLIM4/MYL9/NEBL/ACTN1/LIMA1  
NH1/PAG1/UNC5B/EZR/BSG/ARID3A/PGK1/KIF18A/RHOQ/S100A10/TRAF2/HMOX1/SELPLG/FLOT2

15/CLTA/SYT8/STX1A/STX6/RAB3B/BIN1/TMED9/STX10/RAB35/MT3/SYTL1/SV2A/SYNGR3/CLN3  
RRS1/DDX11/FBL/EEF1D/NOP58/DEAF1/MAP3K14/DSN1/SMARCB1/RAE1/IP6K1/UTP4/INO80C/BT  
/A1BG/PLG/AHSG/HRG

STX1A/STX6/RAB3B/BIN1/TMED9/STX10/RAB35/MT3/SV2A/SYNGR3/CLN3/MCTP1/TMEM163/VDAC  
/SERPINH1/PAG1/UNC5B/EZR/BSG/ARID3A/PGK1/KIF18A/RHOQ/S100A10/TRAF2/HMOX1/SELPLG  
OT2/CLTA/FCHSD1/TNFAIP2/TIGD5/WIPF1/HIP1R/LASP1/GPSM2/FLOT1/CAP1/CAPZA1/RTKN/GY  
GNAZ/CD2/GM2A/MAP2K2/HM13/GNA12/GNGT1/PTPN7/PLEKHA4/LYN/GNG5/MIEN1/GNB1/FGR/LCK

14/RPS27/EIF2D/RPS6/RPS24/RPS3A/RPS18/RPS28/RPS17/RPS15A  
3/CIT/GOLGA3/FUT2/FUT6/LLGL1/CHPF/NAGPA/B4GALNT3/B4GALNT4/FUT1/ARAP1/NECAB3/FUT  
/CBX6/IGF2BP1/ADORA1/LAMP5/NPTX2/DAGLA/GIT1/TWF2/DLG3/NECTIN1/TRPV2/ORAI2/RANGA

T2/FUT6/CHPF/NAGPA/B4GALNT3/B4GALNT4/FUT1/ARAP1/FUT8/B4GALT4/GOLPH3L/TMEM115/TM  
PARD/LEF1/NONO/ATF4/MED8/CBFB/TAF9/SFPQ/ASCL2/E2F2/VDR/CDK7/HNRNPAB/KAT2A/GTF3C  
PL18/MRPL37/NSUN4/MRPL27/MRPL28/MRPL51/MRPL11/MRPL15/C12orf65/MRPL4/MRPS24/MRPL  
PL18/MRPL37/NSUN4/MRPL27/MRPL28/MRPL51/MRPL11/MRPL15/C12orf65/MRPL4/MRPS24/MRPL

/COTL1/FERMT3/PRKCD/TOR4A/SERPINI1/QSOX1/VAT1/MVP/UNC13D/TUBB/CSTB/TMSB4X/S100A  
ITGB2/CIB2/TPM4/COTL1/HSPB1/TRIP10/WDR34/MAPRE1/ASPH/EZR/DCDC2/RHOG/IFT57/FMNL1  
2/DLG3/NECTIN1/TRPV2/ORAI2/KIF21B/DTNBP1/FSCN1/TIMP2/MAP2/BRSK1/IQGAP1/HSPA8/TH

S1B/DDA1/TSPAN17/DYRK2/ZSWIM5/UBE2J2/ANAPC7/SPSB1/FBXO32/KCTD10/UBE2L3/CBX4/ANA

B1/AP4B1/AP5S1/HIP1/TEPSIN/AFTPH/AP3M1

ACOT2/NUDT7/PEX11A/PEX11G/ECI2/ACOX1/ACAA1/PXMP2/ACSL6/HSD17B4/AMACR/PECR/GRHPR  
ACOT2/NUDT7/PEX11A/PEX11G/ECI2/ACOX1/ACAA1/PXMP2/ACSL6/HSD17B4/AMACR/PECR/GRHPR  
SON/ZBTB17/POLA1/PRIM2/XRCC6/RPA2/POLD3/NFYC/PRPF19/RPA1/TBP/SMARCAL1/HMGA2/ERC

YL1/CCDC115

/COTL1/FERMT3/PRKCD/TOR4A/SERPINI1/QSOX1/VAT1/MVP/UNC13D/TUBB/CSTB/TMSB4X/S100A  
/CAPZA1/RTKN/HCLS1/CTTN/MYADM/WAS/LLGL1/GMFG/WDR1/NF2/ACTR3/DBNL/CAPN2/WIPF2/DS

CD5L/FGG/GC/BCHE/CFHR1/FGA/AMBP/ITIH2/TF/F2/APOA2/SERPINF2/CPN2/HP/ITIH1/C8A/AL

/PHF1/SKP1/BAP1/SUZ12/SCML2/EZH1/JARID2/PCGF1/PHC1

RAE1/NUP155/RANBP1/NUP107/CETN2/SEC13/XPO7/EIF5A/NXT2/KPNA6/SEH1L/RANBP3/ENY2/M

MRPS15/RPS27A/RPS12/RPS4X/UBA52/RPS11/RPS9/RPS14/RPS27/MRPS24/EIF2D/MRPS5/RPS6/  
S1/CKS1B/POLR3K/POLR2H/CCNO/PIK3CD/CDK2/CHRA1/PRIM1/PFKM/CDK5/TAF9/SOCS3/CDK7/

B/CCNJL/CCNE2/CDK5R1/ATG13/WDR41/PHKA2/GTF2H1/PHKG2/MMS19/ERCC3/MAP3K7/CCNG2/UL  
OE1/TGS1/HINFP/LSG1/PRPF4/COIL/AK6/ZNF473/RDM1/SMN2/HNRNPA2B1/NOLC1

/TIMP2/MAP2/IQGAP1/THY1/BASP1/PALLD/HSP90AB1/ARPC3/DYNLT1/CYTH2/HCLS1/DCTN2/FKB

4/ZDHHC9/ERGIC3/ACER3/STEAP2/BET1L/ERGIC2/QSOX2/IER3IP1/TBC1D20/ZDHHC20/YIF1A/E

L12/MRPS34/MRPL13/CHCHD3/GRPEL2/NDUFS6/TOMM40L/TIMM50/MRPL10/ROMO1/MRPL52/NDUFS

A-DMB/CHMP4B/CXCR4/VPS37C/TMEM165/MAPK3/TCIRG1/MICALL1/MAP2K2/CD63/CHMP4C/ANKRD  
CLSTN1/TGFB1/AURKA/PPT1/CTSV/CYBB/ADA/STX3/FLNA/NCDN/SNAP25/CPLX2/KCNJ11/SCGN/A  
BRI3/SLCO4C1/VAPA/NCSTN/SURF4/ARL8A/DNAJC13/GAA/TMEM179B/PIGR/CEACAM6/RAP1B/BST  
3/MATK/KCNAB2/GNG4/GNGT2/STAC/GNAI3/RHOA/CAV2/CYTH3/SNX5/GNAI3/ATP2A2/GNG2/CARM  
2A/NUP155/NUP107/AXL/SEC13/RPS27A/BICD1/UBA52/RAB29/VPS37B/KPNA6/SEH1L/PI4K2A  
2A/NUP155/NUP107/AXL/SEC13/RPS27A/BICD1/UBA52/RAB29/VPS37B/KPNA6/SEH1L/PI4K2A

/TIMP2/MAP2/IQGAP1/THY1/BASP1/PALLD/HSP90AB1/ARPC3/DYNLT1/CYTH2/DCTN2/FKBP4/CDK

NRGN/RUSC1/MAPK8IP2/DLG3/DLGAP4/SCRIB/CTNND2/RPL8/DNAJC6/DTNBP1/MAP2/DGKZ/RGS14

2B/FCHSD1/TUBA1A/SCAMP4/RAB35/EHD1/SNF8/RAB11FIP4/MCTP1/RAC1/EHD2/RAP2A/RAB10/T

K2A1/MBD3/GATAD2A/MECOM/SAP130/MORF4L1/HDAC5/SIN3B/HDAC8/ING2/MBD2

ACOT2/HSDL2/VWA8/NUDT7/PEX11A/PEX11G/ECI2/ACOX1/ACAA1/PXMP2/ACSL6/HSD17B4/AMACR  
/KPNB1/ATXN2L/RAC1/ACTB/APOBEC3G/RPL28/LSM2/EDC3/GRB7/SAMD4B/BARD1/NCL/HENMT1/C  
ACOT2/HSDL2/VWA8/NUDT7/PEX11A/PEX11G/ECI2/ACOX1/ACAA1/PXMP2/ACSL6/HSD17B4/AMACR  
C/NPTX2/NRGN/DLG3/DLGAP4/SCRIB/GIPC1/DTNBP1/FLOT2/DGKZ/RGS14/PPP2R1A/PPM1H/NRCA

11/PSMD1/PSMA7/PSMB3/USP22/ATXN7L3/PSMD4/PSMD3/PSMD7/TAF12/PSMD8/VCP/PSMA1/UBQL

USC1/MAPK8IP2/DLG3/SCRIB/CTNND2/RPL8/DNAJC6/DTNBP1/MAP2/DGKZ/RGS14/SHARPIN/NRCA

1L/CEMIP/HSPD1/DNM2/TNK2/AAK1/MYO6/AP2A2/CLTC/AP1S1/AP1S3/AP1S2/AP2B1/AP2A1/EPN  
/RPA3

2/CCDC80/VWA1/COL4A2/LAMB3/COL8A2/RELL2/ACHE/THBS2/LAMA4/LOXL1/EFEMP2

MRPL15/C12orf65/MRPL4/MRPL33/MRPL36/MRPL14/MRPL3/MRPL20/MRPL24/MRPL55/MRPL21/MR  
MRPL15/C12orf65/MRPL4/MRPL33/MRPL36/MRPL14/MRPL3/MRPL20/MRPL24/MRPL55/MRPL21/MR  
6/ARMCX3/GDAP1/STX1A/TIMM17B/STX6/RAB3B/NPC1/P2RX5/STX10/RAB35/BID/SLC25A19/UQC

/NCAPH/RELB/SMARCD3/POLD1/NUP62/RCC1/EZH2/DNMT1/HDAC7/ARID3A/CREB3L1/RAN/HSF1/S  
MAGED1/SOX12/RALY/DDIT3/BHLHE41/PSMC3IP/SMARCD1/HMGB2/YBX3/TCF3/TRIM28/NROB1/SI  
CNF/TTK/AURKA/STK26/RIPK2/EFNA3/SQSTM1/IRAK1/CDK16/PKN1/PRKCD/EFNA4/ITPKA/SYK/S  
Z/COL1A2/COL9A2/KRT17/AGRN/PI3/TUBG1/TPM4/MAL2/VCAN/COL4A5/NCK2/EMILIN2/LAMB1/N  
1/ARHGAP4/RACGAP1/CHML/NCAPH/PRKCD/B3GAT3/ADAP1/PLCB1/DEPDC1/GMIP/GIT1/ASAP1/GU  
/ARPC1B/PFN2/STMN1/FBLIM1/MICAL1/PRC1/KIF23/NDRG1/DNM1/KIFC1/CLSTN1/KIF18B/ATP1  
13/CCNE1/CCNA2/PBK/PNCK/DTYMK/CCNF/TTK/AURKA/STK26/RIPK2/EFNA3/SQSTM1/UCK2/IRAK  
RGS10/MCM4/NUDT1/RAC2/ATP13A2/TUBA3C/DNM1/KIFC1/RFC4/KIF18B/ATP1A1/ARL2/RAD51/R  
RGS10/MCM4/NUDT1/RAC2/ATP13A2/TUBA3C/DNM1/KIFC1/RFC4/KIF18B/ATP1A1/ARL2/RAD51/R  
RGS10/MCM4/NUDT1/RAC2/ATP13A2/TUBA3C/DNM1/KIFC1/RFC4/KIF18B/ATP1A1/ARL2/RAD51/R  
RGS10/MCM4/NUDT1/RAC2/ATP13A2/TUBA3C/DNM1/KIFC1/RFC4/KIF18B/ATP1A1/ARL2/RAD51/R  
/SRC/PRC1/ARHGEF16/NCN1/CKS2/RAC2/CCNE1/DNM1/CCNA2/TRIB3/ATP1A1/CCNF/RHOV/RCC2/  
S2/RAC2/CCNE1/DNM1/CCNA2/TRIB3/ATP1A1/CCNF/RHOV/RCC2/AURKA/GSTP1/MARCKS/CDC25C/  
GAPDH/RIPK2/PMEPA1/CDC25C/SQSTM1/YWHAZ/SHCBP1/BCL2A1/ROB1/LAT2/VASP/ADAM9/SYK/  
NXA2/IKBKE/NCF2/CTSC/SH3BP1/ANXA5/TIMP1/RGS10/CKS2/LGALS3/SPINT2/RAC2/ALOX5AP/C  
/NDRG1/MMP14/DSG2/GPNMB/YWHAZ/FLNA/ITGB2/FXYD5/CIB2/PLIN3/S1PR2/FERMT3/P2RX4/KL  
/ARHGEF2/CYTH4/ITPKA/CDC42EP1/RCC1/UNC13D/FGD3/FMN2/FMN1/RAB11FIP5/RAB34/TBC1  
XYD5/TPM4/COTL1/VASP/USH1C/FHL3/TMSB4X/RUSC1/TWF2/FMN2/EZR/LSP1/FMN1/TMEM201/  
6/PKN1/PRKCD/ITPKA/SYK/STK39/WNK2/CDK4/NME2/CDC7/CHEK1/RPS6KA1/LIMK2/GRK6/MAPKA  
DX39A/DSCC1/TOR4A/MCM7/ABCD1/KIF11/PIF1/ATP6V1F/WDR34/TAP1/KIF12/CD320/KIF3C/KI  
EF2/ITPKA/CDC42EP1/RCC1/UNC13D/FGD3/FMN2/FMN1/RAB11FIP5/RAB34/TBC1D16/MICALL2  
EF2/ITPKA/CDC42EP1/RCC1/UNC13D/FGD3/FMN2/FMN1/RAB11FIP5/RAB34/TBC1D16/MICALL2



ADAP2/TBC1D16/RANGAP1/RABEP2/IQGAP1/RGS14/ANKRD27/THY1/ARHGAP9/SIRPA/GPSM1/ARHG  
PSRC1/CLIP2/ARL4C/TLL4/FCHO1/RACGAP1/CCDC88B/ARHGEF2/REEP4/NME1/PRNP/TRIM54/KI  
/P2RX4/KLC2/VASP/CDC42EP1/TES/MAPRE1/TAGLN2/LAD1/TWF2/FMNL2/ASAP1/YKT6/PKP3/EZR  
MX2/RHOG/TUBB4B/GBP5/GNA15/RAN/RAB34/RHOQ/RRAD/RHOC/RAB6B/RAB32/RAB15/GNAZ/RRAG  
F2/CCL5/CCL26/TRAF5/ITGA5/TNFSF9/MIF/FKBP1A/BEX3/EFNA5/IL34/EBI3/LEFTY1/SPRED1/  
/RANGAP1/RABEP2/IQGAP1/RGS14/ANKRD27/THY1/ARHGAP9/SIRPA/GPSM1/ARHGEF19/TBC1D1/R  
AP1/RABEP2/IQGAP1/RGS14/ANKRD27/THY1/ARHGAP9/ARHGEF19/TBC1D1/RIN1/ARHGAP39/GDI1  
CL5/CCL26/TNFSF9/MIF/IL34/EBI3/LEFTY1/SECTM1/CCL13/GPI/CCL2/TXLNA/CXCL9/CXCL3/C  
/RACGAP1/CCDC88B/ARHGEF2/REEP4/PRNP/TRIM54/KIF11/SPAG5/MAPRE1/MX2/S100A8/EZR/KI  
DNMT1/EME1/MCM5/POLA2/GINS4/RUVBL1/CHTF18/APEX2/CHD3/DKC1/RBBP8/PCNA/TOP1MT/XRC  
/TPM2/ARPC4/LCP1/MAP1S/TPM3/CORO1C/BIN1/CORO7/ARPC2/GAS7/PPP1R9B/TIGD5/ARPC3/WI  
BX3/PLEKHG2/VAV1/IQGAP1/PAK1/CORO1C/PPP6R1/ARHGEF19/DVL3/NCKAP1L/PAK4/RTKN/DAPK  
AP2K2/NPM1/SPRED1/SOCS1/CKS1B/HSP90AB1/MARK2/MT3/CCNO/NCKAP1L/MLST8/DBF4/CDKN2B  
/SAE1/SDCBP2/IFT52/DYNLL1/PABPC1/DYNLT1/GPSM2/ITGB3BP/DAPK3/ATF4/SNF8/TESK1/PIA  
/NCAPG2/LEF1/NOC2L/NASP/SSRP1/KDM5B/CBX4/NPM3/ATAD2/NAP1L2/SET/RBBP4/SMARCC1/BR  
RPL39/RPL35A/MRPL13/RPS3/RPL27/RPL35/RPS20/RPL18A/RPS19/RPLP0/RPL18/RPL23/MRPL1  
4/FUBP1/POLR2H/BLM/SMC4/PRIM1/SSBP4/JCHAIN/MSH2/POLA1/MCM8/NABP1/RPA2/MAPT/POLR  
PPME1/KCNQ1/ANAPC7/STRN4/LCK/PPP1CC/CTTNBP2NL/CADM4/TRAF3/GRB2/PTPA/KAT2A/PPP1R  
P1/ARHGAP1/PLSCR1/HCLS1/LYN/CNTNAP1/BCAR1/ADAM12/WAS/ADAM19/PTPN6/CIT/INPP5J/MV  
4/MKKS/CLN3/CCT7/PFDN2/TCP1/DNAJB2/SRSF12/DNAJA4/NAP1L4/PFDN1/RUVBL2/CALR/DNAJB  
TIMP2/COL5A1/MFGE8/ITGA5/LCP1/JAML/ISG15/LAMA5/TSPAN8/THY1/ITGB5/LYN/TSPAN4/ITG  
C2/KIF14/KIFC3/KIF15/DYNC1L1/KIF2A/DNAL4  
/RBBP4/TTF2/POLQ/RAD51C/DNA2/RAD51D/RAD18/RFC5/DHX9/SMARCA5/GTF2H1/SMARCA1/MSH

MD/MAPK13/CCNE1/CCNA2/PBK/PNCK/DTYMK/CCNF/TTK/AURKA/STK26/RIPK2/EFNA3/SQSTM1/UC  
/RNPS1/ZC3H12A/NCBP2/EIF3D/SNRPC/SSB/SRRM3/RPS5/DAZAP1/RPL7/CPSF1/THOC5/DENR/ED  
K3/MAST2/SPRED1/SIRPA/SFI1/PPP6R1/STAT1/RCAN3/PPP1R9B/PPP1R35/PPP1CA/SLC9A3R1/P  
TF18/CHD3/SMARCA4/DDX49/ERCC6L/RFC2/DDX11/DDX27/BLM/EIF4A3/CHD4/RUVBL2/TTF2/MCM  
NRPC/RPN2/ZNF593/PQBP1/GCN1/CPSF6/EIF4A3/XPO5/PRPF6/CBX5/RACK1/TIMM50/LETM1/ZNF  
1/BLM/CHD4/RUVBL2/MCM8/XRCC6/POLQ/DNA2/CHD1L/DQX1/NBN/RAD18/ACTR5/RFC5/DHX9

FNA5/MAP2K2/NPM1/SPRED1/SOCS1/CKS1B/HSP90AB1/MARK2/MT3/CCNO/NCKAP1L/MLST8/DBF4/  
PLEKHA4/MYO1G/KCNQ1/TULP3/PLEKHA2/VIL1/WDR45B/PFN1/GSDMD/SYT1/MAPT/OBSCN/SNX20/  
L2/WASF1/OCRL/ABI2/ARHGDIA/ARFIP2/BRK1/SRGAP2/PAK2/DOCK2/EPS8L1/CAV1/ATP7A/PREX

STD2/EMB

CNE1/CCNA2/PBK/PNCK/CCNF/TTK/AURKA/STK26/RIPK2/EFNA3/SQSTM1/IRAK1/CDK16/HK2/PFK  
IM28/CACYBP/CXCR4/TRAF5/HIF1A/HSPA8/RNF34/HM13/BRCA1/UBASH3B/HGS/CCT2/HSP90AB1/  
8/EIF3B/STX1A/SH2B2/HIP1R/SLC9A3R1/LASP1/GAS2L1/BCL3/ARHGAP1/SHC1/SPSB1/AXIN1/H

ACYBP/CXCR4/TRAF5/HIF1A/HSPA8/RNF34/HM13/BRCA1/UBASH3B/CCT2/HSP90AB1/TPI1/NPLOC

/MTF2/HMG1/RNF4/VRK1/DNTTIP1/MBD3/HMG2/MLLT6/SMARCA5/HMGA2/PHF1/HNRNPC/MBD2/S

H1/MYO19/KIFC2/DYNLT1/MYO1G/MYO1F/KIF14/DCTN2/KIFC3/KIF15/DYNC1LI1/KIF2A/DNAL4/  
CXCL16/PF4V1/CXCL11/XCL2/CCRL2

C/RABL6/RHOG/TUBB4B/GBP5/GNA15/RAN/RAB34/RHOQ/RRAD/RHOC/RAB6B/RAB32/RAB15/GNAZ/  
C/RABL6/RHOG/TUBB4B/GBP5/GNA15/RAN/RAB34/RHOQ/RRAD/RHOC/RAB6B/RAB32/RAB15/GNAZ/  
/CYP2C8/CYP2C9/CYP8B1/CYP2A6/CYP3A4  
3PXD2B/SLC9A1/SDCBP2/RNF34/ARHGAP9/RAB35/HIP1R/PLEKHA4/MYO1G/KCNQ1/TULP3/PLEKHA  
/CYP4A11/CYP2E1

TA2/PHB/MIER2/SFPQ/PARP1/CHD4/YWHAB/TFAP4/RBBP4/KAT2A/CBX5/NCOR2/RAD9A/MTA3/UHR

OX1/ALDH6A1/ADH4

/ACHE/COL11A1/THBS1/ADAMTS5/VEGFA

C38A3/SLC51A/SLC16A11/SLC01B3/SLC27A2/SLC6A12/SLC6A1/SLC01B1/SLC27A5/SLC10A1  
G/TUBB4B/GBP5/GNA15/RAN/RAB34/RHOQ/RRAD/RHOC/RAB6B/RAB32/RAB15/GNAZ/OLA1/RRAGD/  
G/TUBB4B/GBP5/GNA15/RAN/RAB34/RHOQ/RRAD/RHOC/RAB6B/RAB32/RAB15/GNAZ/OLA1/RRAGD/

/TDG/RAD1/NBN/RAD18/ERCC1/RPA1/MSH6/TP53BP1/DCLRE1C/ERCC3/DDB1/UNG/ERCC2/XRCC5/  
/TNFAIP8L3/TPCN1/SNX8/GPAA1/IQGAP1/SH3PXD2B/SLC9A1/SDCBP2/RNF34/THY1/ARHGAP9/RA  
/NR1I3

CADM/PECR/TM7SF2/ACADL/ACADSB/SRD5A2/ACOX2/AKR1D1  
POC1/ACOX2/ALB/FABP4

B4B/GBP5/GNA15/RAN/RAB34/RHOQ/RRAD/RHOC/RAB6B/RAB32/RAB15/GNAZ/OLA1/RRAGD/GBP2/  
1/GAS2L1/BCL3/ARHGAP1/SHC1/SPSB1/HCF1/FKBP4/CNTNAP1/JCHAIN/AP2M1/SLA/EVPL/DVL2

CTG1/TUBB4A/ACTB/TUBB2B/TUBG2/CROCC/VIM/KRT20/EPB41L3/ARPC5/CCDC6/ACTR3/BICD1/A

AE1/MVB12A/DCUN1D5/IKBKG/RNF4/UBE2L6/UBXN1/TNFAIP3/USP5/NSFL1C/FAAP20/TDG/UBA2/

C6A1/SLC13A5/SLC22A1/SLC10A1

09/HLA-DRB5/TSPAN4/JCHAIN/HLA-B/CD48/LILRB4

37/DAB2IP/CASP3/MADD/TRAF1/TNFSF13/TNFSF18/CD70/FASLG

US2/PRKAR1B/GSKIP/YWHAG/SH3BP5L/GMFB/RPTOR/CIB1

AS1/ZP3/SRPX2/TUFT1/LAMC2/LAMA5/FMOD/COL5A2/COL6A3/TNC/MUC3A/MGP/BGN/COL6A2/VWA  
/STEAP4/GCDH/KMO/ACADM/FMO4/PRODH2/LDHD/ACADL/FMO5/XDH/ACADSB/ACOX2/AOX1/DAO/FM  
S2R40/TAS2R3/TAS2R7/TAS2R13/TAS2R60

C2/DKK1/CLCF1/GDF15/CMTM3/NBL1/LY6E/CKLF/PGF/IL18/TFF1/PTHLH/GUCA2A/METRNL/TYMP

G1/OR8D2/OR5AK2/OR2C1

P4HB/PDIA4/NXN

BC1D10B/EHD1/SYTL1/ARHGAP1/TBC1D30/RAB11FIP4/RAC1/TBC1D13/SBF1/TRAPPC1/DENND6B/

D1/HRG/SERPINC1

G/TUBB4B/GBP5/GNA15/RAN/RAB34/RHOQ/RRAD/RHOC/RAB6B/RAB32/RAB15/GNAZ/OLA1/RRAGD/  
G/TUBB4B/GBP5/GNA15/RAN/RAB34/RHOQ/RRAD/RHOC/RAB6B/RAB32/RAB15/GNAZ/OLA1/RRAGD/  
A/IKBK/UBE2L6/UBXN1/TNFAIP3/USP5/NSFL1C/FAAP20/MARK4/GGA3/UBR5/RNF8/FAF1/UBE2N

GFR3/TESK1/LYN/FGR/LCK/SLA/FGFR2/MST1R/MATK/AXL/BTK/DSTYK/IGF1R/ABL1/CSK/PTK2/T

GMO/CYP4V2/CYP27A1/CYP39A1/FMO4/FAXDC2/CYP3A43/FMO5/CYP1A1/CYP4F3/CYP3A5/CYP2A7

MP19/ADAM28/KEL/ADAM17/ADAMTS5/NLN/COPS5/NRDC/PHOX/ADAMTS14/FAP/ADAMTS10/MMP15/

4/KHDRBS1/LONP1/RPS7/PTBP1/HNRNP/EXOSC10/RBMX/HNRNPA1/PPIE/POLR2D/DHX9/TLR7/SU  
CAF13/NUP62/HES4/HDAC7/TLE3/ANKRD1/ZNF296/HMGB3/PRAME/RAN/MDFI/DDIT3/BHLHE41/YE

/JMJD6/NUPR1/CITED4/BCL9/NPM1/BRCA1/SMARCA4/ACTL6A/PRMT2/WDR77/SUB1/REXO4/PPARD  
TSJ1/CD3EAP/METTL1/DDX49/POLR3K/ERI3/POLR2H/FBL/ZC3H12A/USB1/DDX27/NOP2/PUS1/PO

/APOC3/CYP3A4

4/AR/GHR/TTR/GCGR

9/TAS2R50/TAS2R39/TAS2R16/TAS2R40/TAS2R3/TAS2R7/TAS2R13/PKD1L3/TAS2R60

VOC/ATP6V0E1/ATP6V0D1/ATP2A3

VOC/ATP6V0E1/ATP6V0D1/ATP2A3

CB11/ABCG5/MFSD2A/APOA2/SLC51A/APOF/SLC01B3/SLC27A2/ABCA6/RBP4/ABCB4/SLC01B1/FA

SM2B/CPS1/ACSM2A/SLC27A5

HYH/SHMT1/TTPA/GPT/SDS/OGDHL/RBP5/AGXT2/CTH/ABAT/ALB/RBP4/ETNPPL/FTCD/SEC14L2/A  
CYP2A13/CYP4F12/CYP4V2/CYP27A1/CYB5A/CYP39A1/AMBP/CAT/CYP3A43/CYP1A1/CYP4F3/CYP  
/ACOT12/CES3/NOTUM/AADAC/RGN/PON3/PON1

LUM/RELL2

FZD7/GNA15/CCL5/CCL26/GNAZ/HSPA8/FZD1/GNA12/FPR1/NPFFR2/STAT1/CCL13/SLC9A3R1/DV  
A4/RCOR2/E2F8/HDAC1/NOC2L/HEYL/ATN1/KMT5A/MTA2/KDM5B/CBX4/MIER2/DNMT3A/KCTD1/DR

1B2/OR11G2/OR10H1/OR5V1/OR1Q1/OR11A1/OR8B8/OR1C1/OR2H1/OR10P1/OR1L3/OR2L13/OR1G  
DH6/EHHADH/RDH16/AKR1D1/HSD11B1/HSD17B6/ADH1A/ADH1C/ADH1B/ADH4

6A12/SLC17A2/SLC6A1/SLC13A5/SLC22A1/SLC10A1

1/CLCF1/GDF15/CMTM3/NBL1/CKLF/PGF/IL18/TFF1/PTHLH/GUCA2A/METRNL/TYMP/TNFRSF11B/

DH6/EHHADH/HAO2/RDH16/AKR1D1/HAO1/HSD11B1/HSD17B6/ADH1A/ADH1C/ADH1B/ADH4  
CYP2A13/CYP4F12/CYP4V2/CYP27A1/CYB5A/CYP39A1/AMBP/CAT/CYP3A43/CYP1A1/CYP4F3/CYP

DR34/TAP1/CD320/KIF18A/MCM5/ATP6V0B/ABCC4/ATP6V0D2/HSPA6/ATP6V1C1/ABCC5/CHTF18/

3/SLC1A1/SLC17A1/SLC23A2/SLC13A3/SLC28A1/SLC6A13/SLC17A4/SLC16A2/MFSD2A/SLC38A3

2/CLTC/GAK/AP2B1/AP2A1

PR/F9/PLG/HGFAC

GM0/PHYH/CYP4V2/CYP27A1/CYP39A1/FAXDC2/HAA0/CYP3A43/TF/XDH/CYP1A1/CYP4F3/CYP3A5

MARCB1/CHD4/RUVBL2/RBBP4/TBX19/SMARCC1/HOXB7/MSX1/NFYC/MED12/LMO4/MBD3/HOXA5/ME

DCLRE1C/EXOSC2/EXO5/MGME1/DCP2/CNOT2/PNPT1/ERI1/TREX2/APEX1/PARN  
2I/UBE2Q2/RNF19B/SHARPIN/BRCA1/NSMCE2/MED10/TRIM59/TSPAN17/UBE2J2/BIRC7/MYLIP/P

SLC23A2/SLC13A3/SLC02A1/AKR1C4/SLC22A9/SLC7A2/SLC6A13/SLC17A4/SLC16A2/SLC02B1/S  
A13/SLC17A4/ABCB11/SLC1A2/SLC6A12/SLC17A2/SLC6A1/SLC13A5/SLC22A1/SLC10A1  
J2/CYP2A13/CYP4F12/AGMO/PHYH/CYP4V2/CYP27A1/CYP39A1/FMO4/FAXDC2/CYP3A43/FMO5/CY  
SLC23A2/SLC13A3/SLC02A1/AKR1C4/SLC22A9/SLC7A2/SLC6A13/SLC17A4/SLC16A2/SLC02B1/S

IL/SNRPD3/RBM22

PL5/HNRNPU/EXOSC9/HNRNPR/RSL1D1/MEX3D/RBM24/UTP23/KHSRP/PABPC1L/LARP1/HNRNPA0/R  
P6V0E1/ATP6V0D1/ATP2A3

7

/TTYH1/CFTR/VDAC3/VDAC2/GABRB3/CLCNKA

/SLC38A5

IF2D/EIF2B4/EIF4E2/EIF3F/EIF2B1/EIF5B/EIF4G1/EIF2B2/EIF2B3/EIF3C/EIF1

1/SPI1/NEIL3/UHRF1/MCM6/ZIC2/FEN1/BATF/MAFG/RELB/MCM10/ELF4/MCM7/HES6/NME1/ARNT



A/GAPDH/PSRC1/SKA3/FLNA/MAP7D1/SPC25/CEP131/TUBG1/RACGAP1/CCDC88B/CENPW/ARHGEF2  
MYT1/CDK1/NDC80/NCAPG/MCM2/CDC45/MELK/ANLN/NEK2/STMN1/GINS1/BUB1/DLGAP5/CDC25B/  
EFNA3/TNFRSF12A/FLNA/CD44/ITGB2/AGRN/PLEKH01/FERMT3/ARHGEF2/ROBO1/PLXNA3/ITGAV/  
R2/IGF2BP2/GSTP1/BIRC3/IRAK1/CD74/BATF/CCDC88B/PTAFR/ARHGEF2/PRKCD/HSPB1/RELB/I  
BP2/GSTP1/BIRC3/IRAK1/CD74/CCDC88B/PTAFR/ARHGEF2/HSPB1/RELB/ITGAV/SCAMP5/ABCD1/  
CSF1R/VTCN1/GBP5/CARD9/DDIT3/HLA-DPA1/LTB/TRAF2/HMGB2/TRIM6/HMOX1/CD86/MAPKAPK2  
MAGED1/FZD7/SCRIB/IFT57/CFL1/PSMB9/PSMD14/HNF1B/AREG/TRIM28/RHOC/COL5A1/CXCR4/S  
IPK2/ADA/EXO1/HAVCR2/COR01A/GSTP1/CLCF1/CD44/ITGB2/ALDH3B1/SNAP25/CPLX2/BATF/PT  
FB1/ITGAM/SPI1/CYBB/HAVCR2/GSTP1/CD44/ITGB2/ALDH3B1/SNAP25/CPLX2/CD74/BATF/PTAF  
ALDH3B1/SNAP25/CPLX2/PTAFR/COTL1/PRKCD/LAT2/QSOX1/ITGAV/VAT1/MVP/RAB31/SYK/UNC1  
1/PRKCD/QSOX1/ITGAV/VAT1/MVP/RAB31/SYK/UNC13D/TUBB/CSTB/S100A8/LYZ/NME2/CTSA/TR  
IPK2/ADA/EXO1/HAVCR2/COR01A/GSTP1/CLCF1/CD44/ITGB2/ALDH3B1/SNAP25/CPLX2/BATF/PT  
YBB/EXO1/HAVCR2/COR01A/GSTP1/CLCF1/C1QB/SUSD4/CD44/ITGB2/ALDH3B1/C1QC/SNAP25/CP  
R/COTL1/PRKCD/QSOX1/ITGAV/VAT1/MVP/RAB31/SYK/UNC13D/TUBB/CSTB/S100A8/LYZ/NME2/C  
CD74/BATF/PKN1/RELB/FANCD2/SLAMF8/EFNA4/NME1/PLEK/SYK/CD109/IL18/NME2/CSF1R/CSF  
IL18/NME2/CSF1R/TRPM2/FZD7/HMGB3/TFRC/TNFRSF18/JAK3/TCF3/BAX/CD86/VAV1/SEMA4A/T  
OA14/TGFB1/ITGAM/FCGR3A/LGALS1/RIPK2/ADA/HAVCR2/COR01A/MZB1/CLCF1/C1QB/SUSD4/BI  
CK/PAG1/S100A8/HLA-DRA/MUC1/EZR/HLA-DQB1/VTCN1/CARD9/PSMB9/HLA-DPA1/CTSK/WIPF3/  
PF3/RBCK1/PSMD14/WASF2/BAX/VAV1/PHPT1/CD300A/HLA-DPB1/ARPC4/PSMD2/MAPK3/CD276/H  
1/TONSL/FANCI/SPI1/EXO1/NEIL3/TYMS/CLCF1/DTL/UHRF1/RAD54L/RNASEH2A/MCM6/FEN1/BA  
ME1/CDKN2D/CDC7/CHEK1/NPAS2/HSF1/RHNO1/NABP2/MCM5/AP5Z1/PSMD14/HMGB2/TRIM28/SIR  
1/HDAC7/MUC1/CENPU/HMGB3/CHEK1/PRMT1/SMARCD1/CENPL/YEATS2/HMGB2/TRIM28/BRMS1/SI  
2/DHX37/CD2BP2/JMJD6/LSM4/HSPA8/RRAGC/MAP2K2/PES1/DKC1/PPP2R1A/UPF3B/POLR2G/TRM  
LR2G/FTSJ1/RBM3/EIF2S2/MRPS12/RPS2/PABPC1/TICRR/MRPL47/TRNAU1AP/PPP1CA/MRPL9/PA  
/SYT13/FABP5/TYROBP/CKAP4/PYGB/TGFB1/ITGAM/CYBB/COR01A/GSTP1/STX3/FLNA/CD44/ITG  
/AGRN/CD74/CMTM3/PTAFR/P2RX4/PRKCD/ROBO1/HSPB1/SLAMF8/PLXNA3/ITGAV/EFNA4/VASP/N  
DC25C/DTL/UHRF1/RAD54L/RNASEH2A/CD44/MCM6/FEN1/CD74/BATF/BCL2A1/PRKCD/GINS2/MCM  
P1/ARL2/CCNF/TTK/SKA1/AURKA/GAPDH/PSRC1/SKA3/FLNA/MAP7D1/SPC25/CEP131/TUBG1/RAC  
/NUSAP1/TTK/TGFB1/RCC2/AURKA/GPNMB/PSRC1/HMMR/CDC25C/DTL/CEP131/CDKN2A/TUBG1/EI  
NA2/LIF/SAPCD2/CSF1/AKR1B1/TTK/TGFB1/BAMBI/IQGAP3/RIPK2/ADA/HAVCR2/COR01A/STX3/  
R77/RNPS1/SNRPE/POLR2H/TXNL4A/NCBP2/USB1/SNRPF/LSM7/NONO/LSM10/U2AF2/SF3B5/KDM1  
1/HSP90AB1/NPLOC4/CSNK1E/MAN1B1/PSMB2/PSME3/HSPBP1/BCAP31/UBE2J2/FBXO5/LAMP3/CS  
1/LIF/CENPF/RMI2/ORC1/ECT2/NUSAP1/CCNF/TTK/TGFB1/RAD51/RCC2/AURKA/GPNMB/PSRC1/H  
NCK2/PLXNA3/BAIAP2L2/VASP/PLEK/HRAS/PLCB1/CDC42EP1/NUP62/HCK/CCT5/SPAG5/MAPRE1/  
N2A/ARHGEF2/PRKCD/ROBO1/C1QA/NCK2/ADORA1/PRNP/SYK/FGD3/EEF1E1/CDK4/S100A8/CASP4  
CS1/HLA-DRA/CSF1R/NECTIN1/ALYREF/CENPU/KRT7/MMP1/SCRIB/SLC25A6/RPL8/RAN/CFL1/PS  
PA1/DHX34/CSTF2/PCBP4/SNRPA/MRTO4/SF3A2/CD2BP2/CNOT11/PSMD2/HIF1A/JMJD6/LSM4/HS  
AC1/PRMT2/LEF1/NELFE/RPS6KA4/FBL/MT3/OTUB1/NOC2L/HDAC2/CDK2/KDM1A/KMT5A/HCF1/E  
STM1/TNFRSF12A/YWHAZ/OSMR/BIRC3/CD44/ITGB2/IRAK1/CD74/BATF/PTAFR/PRKCD/ROBO1/IL  
D3/PLEK/TRIM54/FUNDC2/DDR1/ASPH/TWF2/ADAM15/BSG/LAMC1/MMP1/MID1IP1/HSF1/DNAJC6/  
RRP7A/PA2G4/SNRPE/FBL/TXNL4A/DDX27/SNRPF/NOP2/AATF/NOC2L/GTPBP4/EIF3D/NHP2/POP7  
4/S1PR2/RACGAP1/COTL1/ARHGEF2/PRKCD/TRIP10/NCK2/BAIAP2L2/VASP/ADORA1/PLEK/ITPKA  
/EZR/DCDC2/TRPM2/RHOG/IFT57/TUBB4B/PLEK2/KIF3C/RHOQ/FSCN1/ABCC4/CARMIL1/WASF2/R  
AP1/COTL1/ARHGEF2/PRKCD/TRIP10/NCK2/BAIAP2L2/VASP/PLEK/ITPKA/HRAS/CDC42EP1/USH1  
CD2/SLAMF8/EFNA4/NME1/PLEK/SYK/CD109/IL18/NME2/CSF1R/CSF3R/ZNF385A/TRPM2/FZD7/H  
A/JMJD6/TCIRG1/ATP6AP1/ISG15/PRKX/UBASH3B/F2RL1/STAT1/RAB7B/HDAC1/TNFRSF11A/NBE  
/RIPK2/ADA/HAVCR2/COR01A/STX3/FLNA/CD44/ITGB2/IRAK1/FXYD5/CDKN2A/CD74/CCDC88B/P  
TL/UHRF1/GPC3/FLNA/CPVL/ADAM9/UBXN11/ABHD17C/GPC1/PJA1/MAD2L1/CTSA/EZR/PSMB9/GI  
HGAP4/GPNMB/STK26/ADA/COR01A/GSTP1/FLNA/CD74/PTAFR/FERMT3/ARHGEF2/P2RX4/ROBO1/H  
S1/DKK1/EFNA3/FOLR1/STX3/TNFRSF12A/NCDN/AGRN/SNAP25/TPRN/CDK16/ROBO1/SERPINI1/N

B01/SERPINI1/PLXNA3/NME1/PRNP/ITPKA/HRAS/CDC42EP1/USH1C/EZH2/NME2/TWF2/ASAP1/EZ  
AE1/FBXL19/TRIM6/DTX3/TRIM28/NUP210/FKBP1A/UBE2M/UBE2Z/PRKDC/MAD2L2/PSMD2/HIF1A  
4/LIF/SAPCD2/MISP/TYROBP/ECT2/ARL2/TGFB1/ITGAM/AACS/GAPDH/RIPK2/HAVCR2/RHBDF2/G  
P62/GTSE1/CCT5/SPAG5/MAPRE1/EZH2/PACS1/MPV17/EZR/TOMM40/SCRIB/SLC25A6/RPL8/GBP5  
1/MCM6/SNAP25/TUBG1/SNRPB/CENPW/COTL1/PRKCD/NCK2/OIP5/MCM7/BAIAP2L2/VASP/CDC42E  
/IGF2BP3/PGK1/RPL8/HSF1/PSMB9/APOBEC3C/PSMD14/HMGB2/YBX3/BAX/MAPKAPK2/SIRT6/LIN  
/DDX49/RRP9/DDX11/POLR3K/ERI3/REXO4/RRP1/RRP7A/PA2G4/POLR2H/FBL/ZC3H12A/NCBP2/U  
5/PTAFR/COTL1/PRKCD/QSOX1/ITGAV/VAT1/MVP/RAB31/SYK/UNC13D/IL18/TUBB/CSTB/S100A8  
LN1/S100A14/TGFB1/RCC2/ARHGAP4/GPNMB/STK26/ADA/COR01A/GSTP1/STX3/FLNA/CD74/PKN1  
HSPB1/ITGAV/LAMB1/ADAM9/HRAS/STK39/GTSE1/PGF/MAPRE1/TMSB4X/CSF1R/HDAC7/SMIM22/C  
/FZD7/TNFAIP8L2/VTCN1/TFRC/HLA-DPA1/HLA-DMB/TNFRSF18/VSIG4/JAK3/CCL5/BAX/CD86/A  
5/PTAFR/COTL1/PRKCD/QSOX1/ITGAV/VAT1/MVP/RAB31/SYK/UNC13D/IL18/TUBB/CSTB/S100A8  
/AGRN/CD74/CMTM3/PTAFR/P2RX4/PRKCD/ROB01/HSPB1/SLAMF8/PLXNA3/ITGAV/EFNA4/VASP/N  
UPF3B/POLR2G/FTSJ1/RBM3/EIF2S2/MRPS12/RPS2/PABPC1/TICRR/GGCT/MRPL47/TRNAU1AP/PP  
/PRKCD/ROB01/NCK2/PRNP/SYK/FGD3/EEF1E1/CDK4/S100A8/CASP4/ANKRD1/MAGED1/SCRIB/IF  
TP1/MPZ/CLCF1/SQSTM1/YWHAZ/FLNA/BIRC3/CD44/IRAK1/CD74/ARHGEF2/BCL2A1/PRKCD/HSPB  
/PRKCD/ROB01/NCK2/PRNP/SYK/FGD3/EEF1E1/CDK4/S100A8/CASP4/ANKRD1/MAGED1/SCRIB/IF  
TP1/MPZ/CLCF1/SQSTM1/YWHAZ/FLNA/BIRC3/CD44/IRAK1/CD74/ARHGEF2/BCL2A1/PRKCD/HSPB  
/MAN1B1/PSMB2/PSME3/HSPBP1/BCAP31/UBE2J2/FBXO5/CSNK1D/ANAPC7/CDK2/KIF14/SPSB1/P  
EPA1/FLNA/AGRN/EIF4EBP1/COTL1/ARHGEF2/PRKCD/NCK2/BAIAP2L2/VASP/PLEK/HRAS/SYK/CD  
16A1/MMP1/PLEK2/GBP5/HSF1/RHOQ/S100A10/FSCN1/HNF1B/CARMIL1/WASF2/RHOC/BAX/SEMA4  
/TAP1/ZYX/PACS1/HLA-DRA/CSF1R/NECTIN1/ALYREF/CENPU/KRT7/MMP1/SCRIB/SLC25A6/RPL8  
UP62/RCC1/HCK/TAP1/ZYX/LYZ/PACS1/HLA-DRA/CSF1R/NECTIN1/ALYREF/CENPU/KRT7/MMP1/S  
/RPL39L/ACSL4/LIF/KIFC1/SERPINE2/AKR1B1/DSG2/FBLN1/TTK/GAL3ST1/TGFB1/FAM50A/AUR  
NE1/CCNA2/CENPF/ORC1/CCNF/TTK/TGFB1/IQGAP3/RCC2/AURKA/GPNMB/HMMR/TYMS/CDC25C/DT  
ABP5/TYROBP/CKAP4/PYGB/TGFB1/ITGAM/CYBB/COR01A/GSTP1/STX3/FLNA/CD44/ITGB2/ALDH3  
44/ITGB2/IRAK1/C1QC/PPP1R14B/PTAFR/ARHGEF2/PRKCD/C1QA/RELB/SLAMF8/ELF4/IGLL5/HL  
B9/VSIG4/CTSK/PSMD14/HMGB2/TRIM6/CCL5/MAPKAPK2/VAV1/COLEC12/CD300A/UNC93B1/PRKD  
ECT2/TGFB1/BAMBI/AURKA/DKK1/RIPK2/ADA/CLCF1/TNFRSF12A/FLNA/GDF15/S1PR2/CD74/ARH  
11/CDKN2A/PRNP/HRAS/GTSE1/EZH2/CDK4/MAD2L1/MUC1/EME1/CDKN2D/ZNF385A/ARID3A/CDC7  
1/CDC25C/GDF15/IRAK1/CDKN2A/S1PR2/CD74/PKN1/DUSP5/PRKCD/ROB01/HSPB1/NCK2/ADORA1  
CD74/BATF/CCDC88B/PKN1/PRKCD/LAT2/RELB/NCK2/FANCD2/SLAMF8/ELF4/IGLL5/PRNP/SYK/U  
/CCNE1/LIF/CENPF/KIFC1/KIF18B/MISP/NUSAP1/P3H4/TTK/TGFB1/RAD51/AURKA/PSRC1/NCAP  
N1/RELB/FANCD2/SLAMF8/EFNA4/NME1/PLEK/SYK/CD109/IL18/NME2/CSF1R/CSF3R/ZNF385A/T  
R1/FZD6/DLG3/CSF1R/FOXQ1/CD151/COL3A1/ANKRD1/MAGED1/FZD7/SCRIB/IFT57/CFL1/PSMB9  
FR/PRKCD/NCK2/FANCD2/SLAMF8/IGLL5/PRNP/PLEK/SYK/UNC13D/IL18/PAG1/HMGB3/TNFAIP8L  
2/CD44/ITGB2/SDC3/CD74/PTAFR/P2RX4/SLAMF8/ITGAV/SLC7A11/ADORA1/NBL1/SYK/PLCB1/S  
CCNF/TTK/TGFB1/RCC2/ARHGAP4/SPI1/LGALS1/DKK1/UNC119/COR01A/PMEPA1/ANKRD13D/EIF4  
TP1A1/CSF1/DSG2/FBLN1/S100A14/TGFB1/RCC2/ARHGAP4/GPNMB/STK26/ADA/COR01A/GSTP1/F  
/HSPB1/ITGAV/LAMB1/ADAM9/HRAS/STK39/GTSE1/PGF/MAPRE1/TMSB4X/CSF1R/HDAC7/SMIM22/  
IQGAP3/STK26/DKK1/RIPK2/UNC119/PSRC1/GSTP1/CDC25C/GDF15/IRAK1/CDKN2A/S1PR2/CD74  
BP3/PTAFR/CHML/NCAPH/PRKCD/ROB01/PLEK/HRAS/ADAP1/SYK/PLCB1/DEPDC1/GMIP/EZH2/TMS  
2L2/VASP/PLEK/TRIM54/HRAS/CDC42EP1/KIF11/NUP62/HCK/SPAG5/MAPRE1/TMSB4X/S100A8/T  
1/SNAP25/TUBG1/CPLX2/ARHGEF2/LAT2/PLEK/SYK/NUP62/UNC13D/SPAG5/MAPRE1/TUBB/GIT1/  
K/NUP62/UNC13D/SPAG5/GIT1/MAD2L1/STARD3NL/YKT6/EZR/SCRIB/RAN/TMEM201/KIF3C/KIF1  
LCF1/TNFRSF12A/YWHAZ/FLNA/AGRN/SNAP25/ARHGEF2/P2RX4/ROB01/SERPINI1/PLXNA3/SMAR  
/SMARCD3/NME1/NBL1/ITPKA/NAP1L1/EZH2/NME2/TWF2/ASPM/ANKRD1/TRPV2/GRN/TIMP2/TCF3  
2/ARHGAP4/AURKA/LGALS1/DKK1/CLCF1/TNFRSF12A/FLNA/SNAP25/S1PR2/ARHGEF2/P2RX4/ROB  
ECT2/TGFB1/ITGAM/COR01A/GPC4/STX3/SQSTM1/YWHAZ/GPC3/FLNA/ITGB2/CEP131/CDK16/CPL  
AURKA/PPT1/GPNMB/DKK1/RIPK2/ADA/COR01A/GSTP1/MPZ/CLCF1/SQSTM1/YWHAZ/FLNA/BIRC3/  
AP25/CPLX2/DMKN/HK2/PRKCD/TRIP10/REEP4/SLC7A11/IGLL5/BAIAP2L2/ABCD1/RAB31/TAP1/

MB9/TRAF2/RBCK1/PSMD14/SAE1/FBXL19/TRIM6/DTX3/TRIM28/NUP210/FKBP1A/UBE2M/UBE2Z/  
/KIF11/NUP62/RCC1/WDR34/HCK/SPAG5/MAPRE1/TUBB/ASAP1/SMIM22/ASPM/EZR/ANKRD1/DCDC  
P/HRAS/RAB31/GPC1/PACS1/DLG3/PKP3/EZR/BSG/SCRIB/RHOG/RPL8/UBL4A/RAB34/ANXA13/NC  
AP1/EEF1E1/MAPK8IP2/MUC1/EZR/CDKN2D/ANKRD1/ZNF385A/FZD7/CREB3L1/CHEK1/GRN/NPAS2  
TNNT1/TUBG1/TPM4/CCDC88B/COTL1/ARHGEF2/PRKCD/NCK2/BAIAP2L2/VASP/PLEK/TRIM54/CDC  
HAVCR2/COR01A/GPC4/MPZ/FLNA/CD44/ITGB2/IRAK1/FXYD5/CERCAM/CD74/CCDC88B/PTAFR/FE  
2/TRPM2/RHOG/IFT57/TUBB4B/PLEK2/KIF3C/RHOQ/FSCN1/ABCC4/CARMIL1/WASF2/RABEP2/TCT  
ERPINI1/PLXNA3/NME1/PRNP/ITPKA/HRAS/CDC42EP1/USH1C/EZH2/NME2/TWF2/ASAP1/EZR/ANK  
KN2A/TUBG1/SMARCD3/PLCB1/GTSE1/MAPRE1/TUBB/EZH2/CDC25A/CDK4/MAD2L1/MUC1/CDKN2D/  
C80/NCAPG/MCM2/CDC45/MELK/ANLN/NEK2/STMN1/GINS1/BUB1/DLGAP5/CDC25B/BUB1B/MKI67/  
/PSMD2/HIF1A/ATP6AP1/SASH3/ISG15/UBASH3B/SOCS1/IRF1/STAT1/RAB7B/HDAC1/CTLA4/FST  
P131/KCNJ11/TAX1BP3/PRKCD/SLC7A11/B3GAT3/PRNP/HRAS/ABHD17C/NUP62/GTSE1/GPC1/CCT  
LN1/S100A14/TGFB1/RCC2/ARHGAP4/GPNMB/STK26/ADA/COR01A/GSTP1/FLNA/CD74/PKN1/PTAF  
/ITGAV/LAMB1/ADAM9/HRAS/STK39/GTSE1/PGF/MAPRE1/TMSB4X/CSF1R/HDAC7/SMIM22/CD151/  
2AF2/SF3B5/KDM1A/SRSF9/SNRPC/GEMIN7/BUD31/DAZAP1/SNRNP40/RBM19/PPIL1/RBMX2/SFPQ  
2AF2/SF3B5/KDM1A/SRSF9/SNRPC/GEMIN7/BUD31/DAZAP1/SNRNP40/RBM19/PPIL1/RBMX2/SFPQ  
2AF2/SF3B5/KDM1A/SRSF9/SNRPC/GEMIN7/BUD31/DAZAP1/SNRNP40/RBM19/PPIL1/RBMX2/SFPQ  
PGK1/HSF1/PLOD1/PSMB9/PLAU/PSMD14/HMOX1/CXCR4/SLC9A1/PSMD2/FUNDC1/HIF1A/PAK1/GN  
/SNAP25/CPLX2/PTAFR/COTL1/PRKCD/LAT2/QSOX1/ITGAV/VAT1/MVP/RAB31/SYK/UNC13D/TUBB  
ANCD2/SLAMF8/IIGL5/PRNP/SYK/UNC13D/IL18/PAG1/HMGB3/TNFAIP8L2/VTCN1/CD320/GRN/TF  
QA1/HCK/PAG1/S100A8/HLA-DRA/MUC1/EZR/HLA-DQB1/VTCN1/CARD9/PSMB9/HLA-DPA1/CTSK/W  
NPS1/NELFE/SNRPE/POLR2H/TXNL4A/NCBP2/SNRPF/LSM7/NONO/LSM10/U2AF2/SF3B5/KDM1A/SR  
1/NDC1/SNRPE/XPO6/NUP188/ZC3H12A/CSE1L/NCBP2/SNRPF/FERMT1/SIX2/HTATIP2/KPNB1/HC  
AG1/S100A8/EZR/TNFAIP8L2/VTCN1/TFRC/HLA-DPA1/HLA-DMB/VSIG4/JAK3/CCL5/CD86/VAV1/  
/RAB31/CDC42EP1/NUP62/GMIP/FGD3/DNMT1/COL3A1/RHOG/RAB34/CFL1/RHOQ/DOK2/RRAD/ARH  
H2/LIN28B/NUP210/PCBP4/CNOT11/PSMD2/MAPK3/HSPA8/EIF3B/MAP2K2/DKC1/NPM1/UPF3B/PO  
ID3A/CDC7/CHEK1/PRMT1/PSMB9/PSMD14/ESPL1/BAX/MIF/LCMT1/NAA10/PCBP4/CASP2/BRSK1/  
/LINGO1/P3H1/CXCR4/SEMA4A/MAP2/BRSK1/IQGAP1/PTK7/EFNA5/SF3A2/FZD1/PAK1/CRABP2/A  
GAV/LAMB1/COLGALT1/ELF3/DDR1/SERPINH1/MPV17/ADAM15/BSG/COL16A1/COL3A1/TNFRSF11B  
/LAMB1/ADAM9/HRAS/STK39/GTSE1/PGF/MAPRE1/TMSB4X/CSF1R/HDAC7/SMIM22/CD151/GRN/TN  
DDIT4/PPP1CA/MRPL9/DVL3/MRPS23/CAPZA1/FRAT2/FZD2/CAMSAP2/CLN3/AXIN1/GBA/MRPL12/  
1/CHEK1/NABP2/CCT6A/CCT3/TRIM28/ESPL1/SIRT6/LCMT1/NAA10/NAA40/MAD2L2/MAPK3/PYGO  
WF2/ASAP1/MMP1/GBP5/FSCN1/HNF1B/CARMIL1/RHOC/PLEKHG2/BAX/CCL26/MAP2/LCMT1/MSN/A  
1/SNAP25/CPLX2/PTAFR/COTL1/PRKCD/LAT2/QSOX1/ITGAV/VAT1/MVP/RAB31/SYK/HCK/UNC13D  
1/PRKCD/QSOX1/ITGAV/VAT1/MVP/RAB31/SYK/UNC13D/TUBB/CSTB/S100A8/LYZ/NME2/CTSA/TR  
NE1/CCNA2/CENPF/ORC1/CCNF/TTK/TGFB1/IQGAP3/RCC2/AURKA/GPNMB/HMMR/TYMS/CDC25C/DT  
1/SPAG5/EZH2/CDC25A/CDK4/MAD2L1/MUC1/ZNF385A/ARID3A/CDC7/CHEK1/HSF1/RHNO1/PRMT1  
7/RNPS1/NDC1/SNRPE/XPO6/NUP188/ZC3H12A/CSE1L/NCBP2/SNRPF/FERMT1/SIX2/HTATIP2/KP  
1B/PRC1/KIF23/TUBA1B/ETV5/ZWINT/CKS2/ORC6/CCNE1/CCNA2/CENPF/KIFC1/SAPCD2/KIF18B  
CD/ROBO1/HSPB1/ADORA1/ADAM9/HRAS/SYK/STK39/NUP62/EZH2/CDC25A/CDK4/CSF1R/CDKN2D/  
1/NCK2/ITGAV/ADORA1/HRAS/S100A8/MAPK8IP2/MUC1/UNC5B/CASP4/CDKN2D/ZNF385A/MAGED1  
00A10/CARMIL1/WASF2/RHOC/PLEKHG2/CCL26/MAP2/ARPC4/SH3PXD2B/SLC9A1/HSPA8/MAP1S/P  
/ZC3H12A/PSME3/NCBP2/U2AF2/SLC11A1/SRSF9/DAZAP1/PSMB4/RBM19/PSMB8/PSMB10/PSMA5/  
/EZR/RHOG/RAN/GLIS2/ANXA13/CCT6A/MICALL2/EPB41L2/GPD1L/CCT3/SAE1/TRIM28/NUTF2/M  
OG/RAB34/ANXA13/RHOQ/S100A10/EPB41L2/FLOT2/PKDCC/RAB15/AP4M1/PDZD11/LAMA5/RAB3B  
/CCNE1/LIF/CENPF/KIFC1/KIF18B/MISP/NUSAP1/P3H4/TTK/TGFB1/RAD51/AURKA/PSRC1/NCAP  
BCK1/PSMD14/WASF2/BAX/VAV1/PHPT1/CD300A/HLA-DPB1/ARPC4/PSMD2/MAPK3/CD276/HLA-DQ  
PP2R1A/NPM1/UPF3B/RNASET2/POLR2G/YBX1/RPS2/PELO/PABPC1/RNPS1/PSMB2/ZC3H12A/PSME  
PABPC1/RNPS1/PSMB2/ZC3H12A/PSME3/NCBP2/RPL17/RPLP2/CNOT9/LSM7/RPSA/SLC11A1/SSB/  
TWF2/EZR/RHOG/CFL1/MICALL2/RHOQ/S100A10/FSCN1/CARMIL1/WASF2/RHOC/PLEKHG2/CCL26/  
L1/DNMT1/MID1IP1/CHEK1/CARMIL1/CHMP4B/WASF2/ESPL1/MAP2/LCMT1/NAA10/MAD2L2/NUPR1

/PAG1/TNFAIP8L2/VTCN1/TFRC/HLA-DPA1/HLA-DMB/VSIG4/JAK3/CCL5/CD86/VAV1/TNFSF9/CD MIL1/WASF2/P3H1/CXCR4/IQGAP1/PTK7/EFNA5/SF3A2/FZD1/PAK1/CRABP2/ANKRD27/CORO1C/F FL1/CARMIL1/PLEKHG2/SLC12A2/VAV1/SEMA4A/CCL26/MAP2/SLC12A9/MSN/ARPC4/EFNA5/PAK1 NHP2/PUS1/POP7/URM1/EMG1/NOP58/TRMT1/SSB/TRMT61A/UTP18/RPS21/UTP14A/RPL7/NPM3/P PGK1/HSF1/PLOD1/PSMB9/PLAU/PSMD14/HMOX1/CXCR4/SLC9A1/PSMD2/FUNDC1/HIF1A/PAK1/GN IM28/CCL5/CXCR4/MIF/ZP3/MAPK3/TRIM11/SLPI/FUCA2/PPP2R1A/ISG15/CHMP4C/POLR2G/SMA A-DMB/JAK3/CCL5/CD86/VAV1/TNFSF9/MIF/FLOT2/ZP3/HLA-DPB1/CD2/EBI3/MAD2L2/CD276/E 3/TRIM28/CACYBP/BAX/SIRT6/GMNN/PRKDC/MAD2L2/CHTF18/MAPK3/IL27RA/DKC1/PPP2R1A/AC 3/TNFAIP8L2/VTCN1/CD320/TFRC/HLA-DPA1/HLA-DMB/TNFRSF18/VSIG4/JAK3/CCL5/CD86/VAV F1/STK39/CCT5/TFF1/LYZ/CSF1R/TNFRSF11B/NABP2/CCT6A/TFRC/CTSK/CCT3/CHMP4B/POLA2/ AM15/ANKRD1/PGK1/HSF1/PLOD1/PSMB9/PLAU/PSMD14/HMOX1/CXCR4/SLC9A1/PSMD2/FUNDC1/H S2/GDI1/KRT18/BID/RPL17/RPLP2/HSPA4/TRAM1L1/RPSA/YWHAH/BBC3/PMAIP1/ITGB1BP1/REE KN2A/TUBG1/SMARCD3/PLCB1/GTSE1/MAPRE1/TUBB/EZH2/CDC25A/CDK4/MAD2L1/MUC1/CDKN2D/ GED1/CREB3L1/DDIT3/TRAF2/RBCK1/HMGB2/YBX3/HMOX1/BAX/MIF/CASP2/CREB3/HIF1A/NUPR1 L5/CD86/VAV1/TNFSF9/MIF/FLOT2/ZP3/HLA-DPB1/CD2/EBI3/MAD2L2/CD276/EFNB1/CD3E/PAK EF/EME1/CDC7/CHEK1/RHNO1/GINS3/MCM5/POLA2/CACYBP/GMNN/GINS4/CHTF18/PPP2R1A/RBBP 1/P3H4/TTK/SKA1/RCC2/PSRC1/NCAPD2/SKA3/SPC25/TUBG1/FEN1/RACGAP1/CENPW/DSCC1/NCA D3A/SCRIB/CHEK1/NABP2/PRMT1/PSMB9/PSMD14/TIMP2/BAX/LCMT1/NAA10/PCBP4/CASP2/BRSK /JAK3/CCL5/CD86/VAV1/TNFSF9/CD300A/FLOT2/ZP3/HLA-DPB1/CD2/EBI3/CD276/EFNB1/CD3E C4/PAK1/BAIAP2L1/FCHSD1/BIN1/CORO7/ARPC2/GAS7/ARPC3/CORO1B/HIP1R/TPPP3/NCKAP1L/ LA-DMB/VSIG4/JAK3/CCL5/BAX/CD86/TNFSF9/MIF/CD300A/MSN/ZP3/HLA-DPB1/EBI3/CD276/E 93/UTP18/RPS21/UTP14A/RPL7/NPM3/TRMT112/NSUN5/MPHOSPH6/BYSL/RPL35A/LYAR/RRP36/E G/HMGB2/CCL5/SLC12A2/VAV1/CXCR4/CCL26/MIF/CREB3/MAPK3/SERPINE1/JAML/ZNF580/C3AR 20/TFRC/HLA-DPA1/HLA-DMB/VSIG4/JAK3/CCL5/BAX/CD86/TNFSF9/MIF/CD300A/MSN/ZP3/HLA MB/VSIG4/JAK3/CCL5/CD86/VAV1/TNFSF9/CD300A/FLOT2/ZP3/HLA-DPB1/EBI3/CD276/EFNB1/ 2/HSF1/SRXN1/NCF1/AKR1C3/TRAF2/HMOX1/SLC25A24/PRDX1/HIF1A/MAPK3/FZD1/PCNA/ZNF58 P5Z1/PSMD14/HMGB2/TCF3/SIRT6/GINS4/PRKDC/RUVBL1/MAD2L2/APEX2/IL27RA/MND1/RBBP8/ LRB1/IFT52/DYNLL1/DYNC1H1/DPCD/KIFC2/BLOC1S4/DNAAF5/MKKS/KIF14/KPNB1/CLN3/KIFC3 T1/SLC25A19/SLC35B2/SLC35A2/U2AF2/SLC35E4/SRSF9/XPOT/SSB/ZNF593/AKAP8L/SFPQ/CPS RPS21/UTP14A/RPL7/NPM3/TRMT112/NSUN5/SIRT7/MPHOSPH6/BYSL/RPL35A/LYAR/SMARCB1/RR 3/DNMT3A/NUP85/ATAD2/NUP43/RAE1/XPO5/SRRT/HENMT1/POLR2L/NUP155/DROSHA/AGO2/BEND T1/NUP205/NUP37/RNPS1/NDC1/NUP188/NCBP2/U2AF2/SRSF9/XPOT/FKBP4/SSB/ZNF593/AKAP8 NFRSF4/SLC39A10/MNDA/CTLA4/LEF1/TNIP2/BCL3/NCKAP1L/TXLNA/PIK3CD/LYN/CARD11/NFAM K1/PSMB9/PSMD14/LCMT1/BRSK1/MIIP/SSNA1/PSMD2/PPP2R1A/NPM1/CHMP4C/BRCA1/TUBA1A/S A-DPB1/EBI3/MAD2L2/CD276/EFNB1/CD3E/PAK1/SASH3/TNFRSF4/SLC39A10/THY1/SIRPA/SOCS 2/PRKDC/CREB3/HIF1A/NUPR1/PERP/BRCA1/BCL2L12/BMF/NOL3/HDAC1/DDIAS/DYRK2/HYOU1/D OLEC12/MFGE8/CD300A/ARPC4/JMJD6/MAPK3/P2RY6/PAK1/GULP1/CORO1C/SIRPA/SPON2/HSP90 IRF1/PPM1G/HSP90AB1/GAS7/PPP1R9B/E2F8/DDIAS/CGREF1/E2F4/GAS2L1/MLST8/CNOT9/EVI2 -DPA1/HLA-DMB/PSMD14/RAB32/HLA-DPB1/CLTA/PSMD2/HLA-DQB2/HLA-A/CENPE/ITGB5/RAB3B /RPS5/EIF3I/TAF9/EIF2S3/SRSF12/DENR/EDC3/ISY1/CPSF6/GRB7/RUVBL2/PRPF3/SNU13/PRP BIN1/ARPC2/ARPC3/SUB1/CORO1B/HIP1R/BID/TPPP3/NCKAP1L/CXCL13/PMAIP1/MITF/ARPC5L/ /ZNF385A/ARID3A/CDC7/PRMT1/MCM5/POLA2/BAX/FAM83D/BCAT1/PCBP4/CASP2/GMNN/PRKDC/C B/VSIG4/JAK3/CCL5/BAX/CD86/TNFSF9/MIF/CD300A/MSN/ZP3/HLA-DPB1/EBI3/CD276/EFNB1/ H2B2/NCKAP1L/PIK3CD/HCLS1/NLE1/PMAIP1/LYN/CARD11/IL2RA/TNFSF13B/LYAR/PTBP3/MB/S SLC39A10/MNDA/THY1/THEMIS2/CTLA4/PSMB2/SH2B2/ZC3H12A/PSME3/NCKAP1L/HLA-DQA2/PIK /ESPL1/SGO2/MND1/PPP2R1A/RBBP8/XRCC2/SGO1/OSGIN2/NDC1/FBXO5/RSPH1/CDK2/SMC4/FAN 34/CHD3/PPP1R13L/PERP/TAF6/RBBP8/SPRED1/BRCA1/PCNA/BCL2L12/RRS1/E2F8/HDAC1/DYRK L1/MUC1/ZNF385A/ARID3A/CDC7/RHNO1/PRMT1/GIPC1/ESPL1/BAX/FAM83D/PCBP4/CASP2/CNOT B/MISP/NUSAP1/TTK/TGFB1/AURKA/PSRC1/NCAPD2/CDC25C/FLNA/TUBG1/RACGAP1/DSCC1/NCAP 4/SIX2/FZD2/JAG1/RAC1/PSMB4/PDGFA/VANGL1/PSMB8/PSMB10/PSMA5/TGFB2/PSMD13/PSMC4/ 5A/ARID3A/CDC7/PRMT1/MCM5/POLA2/BAX/BCAT1/PCBP4/CASP2/GMNN/PRKDC/CNOT11/RBBP8/R

D14/LCMT1/BRSK1/MIIP/SSNA1/PSMD2/PPP2R1A/CHMP4C/BRCA1/TUBA1A/SFI1/DYNLL1/DYNC1H1/SNX10/EVI2B/PIK3CD/HCLS1/MITF/LYN/PIAS3/THOC5/IFI16/CCR1/OSTM1/PARP1/IL15/LTBR/F2RL1/ARPC2/GAS7/ARPC3/WIPF1/CORO1B/HIP1R/NCKAP1L/CAP1/CAPZA1/MKKS/FHOD3/HCLS1/UP43/RPL39/RPL35A/SMARCB1/RAE1/RPS3/TFAP4/RPL27/POLR2L/NUP155/RPL35/RPS20/NUP10/EBI3/CD276/EFNB1/CD3E/PAK1/SASH3/THY1/SIRPA/SOCS1/CTLA4/FSTL3/CD83/PDCD1/SIRPG/SFPQ/CPSF1/THOC5/NUP85/NUP43/AGFG1/THOC6/RAE1/CPSF6/EIF4A3/XPO5/NUP155/CPSF4/NU/SFPQ/CPSF1/THOC5/NUP85/NUP43/AGFG1/THOC6/RAE1/CPSF6/EIF4A3/XPO5/NUP155/CPSF4/NU/NFSF9/MIF/CD300A/ZP3/HLA-DPB1/EBI3/CD276/EFNB1/CD3E/SASH3/TNFRSF4/SLC39A10/MNDA1L1/CENPO/CENPU/HMGB3/MCM5/CENPL/HMGB2/SIRT6/NAA10/GINS4/RUVBL1/CHTF18/CHD3/NPM1/TXN2L/RPS5/EIF3I/TAF9/EIF2S3/SRSF12/DENR/EDC3/ISY1/CPSF6/GRB7/RUVBL2/PRPF3/SNU1RC1/NCAPD2/TUBG1/FEN1/RACGAP1/DSCC1/NCAPH/FANCD2/NUP62/SPAG5/MAD2L1/EME1/RAN/KIF9A1/PAK1/BAIAP2L1/FCHSD1/BIN1/F2RL1/ARPC2/ARPC3/LIMCH1/CORO1B/HIP1R/NCKAP1L/CAX/LCMT1/PCBP4/CASP2/BRSK1/MIIP/PRKDC/MAD2L2/CNOT11/PSMD2/CHMP4C/BRCA1/RBL1/PCNL3/LEF1/HIP1R/BID/MT3/BCAP31/PRR7/LAMP3/BBC3/NLE1/PMAIP1/BIRC7/LAMTOR5/F3/LCK/VNIP/KDM1A/PMAIP1/KMT5A/WAS/TAF9/THOC5/PML/PARP1/PSMD10/RPS3/USP1/CBX8/POLQ/FUS/BP2/CCT4/FLOT1/NHP2/U2AF2/CCT7/SRSF9/NOP58/XPOT/SSB/ZNF593/AKAP8L/TCP1/SFPQ/CPS5/SLC9A3R1/DYNLT1/GPSM2/FERMT1/NCKAP1L/CAP1/WNT7B/CCL4/FAM89B/RAB10/CYP26B1/MA1D86/TNFSF9/MIF/CD300A/ZP3/HLA-DPB1/EBI3/CD276/EFNB1/CD3E/SASH3/TNFRSF4/SLC39A10/ASH3/THY1/SIRPA/SOCS1/CTLA4/CD83/PDCD1/SIRPG/NCKAP1L/ADAM8/CCL2/HSPH1/CD209/LYN1CBP4/CASP2/BRSK1/MIIP/PRKDC/MAD2L2/CNOT11/PSMD2/CHMP4C/BRCA1/RBL1/PCNA/CTDSPL/S/EBI3/CD276/EFNB1/CD3E/PAK1/SASH3/THY1/SIRPA/SOCS1/CTLA4/CD83/PDCD1/SIRPG/NCKAP1/BAX/LCMT1/PCBP4/CASP2/BRSK1/WDR76/PRKDC/MAD2L2/CNOT11/PEA15/CHMP4C/BRCA1/PCNA1OSC5/RPS3/SAMD4B/RPL27/AGO2/RPL35/RPS20/RPL18A/RPS19/NT5C3B/RPLP0/RPL18/RPL23/R1BYSL/RPL35A/LYAR/RRP36/EIF4A3/ISG20/EXOSC5/SNU13/RPL27/FTSJ3/RPL35/DDX54/RPS19/L1/CHORDC1/WFS1/PFDN2/TCP1/VBP1/GNB1/DNAJB2/DNAJA4/ERO1A/PFDN1/RUVBL2/DNAJC10/D/RPL35A/RPS3/RPL27/SSR3/PRKCI/RPL35/RPS20/RPL18A/RPS19/RPLP0/RPL18/ICMT/SGTB/RP1C3/CORO1B/HIP1R/TPPP3/NCKAP1L/TUBB4A/CAPZA1/RANGRF/MKKS/FHOD3/CAMSAP2/HCLS1/ARP1BCAP31/PRR7/LAMP3/BBC3/NLE1/PMAIP1/BIRC7/LAMTOR5/F3/LCK/VIL1/CD27/CASP1/PML/GPX1F1/NELFE/POLR2H/PPIA/ZC3H12A/DYNLT1/LAMP3/TRIM31/SNF8/PLSCR1/NELFB/APOBEC3G/CCL1PMAIP1/PSMB4/PSMB8/PSMB10/GNB1/PSMA5/DNMT3A/PSMD13/PSMC4/PSMD10/PSMD11/ERO1A/PS1F6/NPM1/CHAF1A/SMARCA4/ITGB3BP/NASP/CENPI/SWI5/PSMC4/CENPK/NAP1L4/NAP1L2/PARP1/E1/JAML/SIRPA/C3AR1/CCL13/TNFRSF11A/PIP5K1C/NCKAP1L/ADAM8/CCL2/PIK3CD/CXCL9/CXC2R1A/NPM1/CHMP4C/BRCA1/TUBA1A/SFI1/DYNLL1/DYNC1H1/TICRR/CSNK1E/PSMB2/PSME3/HAUS/RACGAP1/DSCC1/NCAPH/NUP62/SPAG5/MAD2L1/RAN/KIF18A/CHMP4B/ESPL1/LCMT1/NAA10/SGO1RCC3/PARBP/DDX11/OTUB1/BLM/AUNIP/KDM1A/WAS/SWI5/SFPQ/PML/PARP1/MSH2/POLA1/BARD1HOC5/NUP85/NUP43/AGFG1/THOC6/RAE1/EIF4A3/XPO5/BARD1/BAG3/NUP155/CALR/CPSF4/NUP11BRCA1/TUBA1A/SFI1/DYNLL1/DYNC1H1/TICRR/CSNK1E/PSMB2/PSME3/HAUS1/BLM/FBXO5/TUBB41F3/LCK/IFI16/CASP1/PML/RPS3/TFAP4/APP/CTSD/HSPE1/PDCD5/FADD/CLEC7A/RACK1/DAP/MA1K3/SERPINE1/JAML/ZNF580/C3AR1/F2RL1/CCL13/TNFRSF11A/PIP5K1C/NCKAP1L/ADAM8/CCL2/C3/MARK2/CEP85/GPSM2/TUBB4A/RANGRF/MKKS/PHLDB1/CAMSAP2/FKBP4/RAC1/CHORDC1/STMN31ZC3H12A/PSME3/HLA-DQA2/PIK3CD/HLA-DRB5/CARD11/PSMB4/BCAR1/PSMB8/PSMB10/LCP2/PSM1PSF1/THOC5/NUP85/NUP43/AGFG1/THOC6/RAE1/CPSF6/EIF4A3/XPO5/BARD1/BAG3/NUP155/CAL1SFPQ/CPSF1/THOC5/NUP85/NUP43/AGFG1/THOC6/RAE1/CPSF6/EIF4A3/XPO5/NUP155/CPSF4/NU1RL1/ARPC2/DYNC1H1/ARPC3/LIMCH1/CORO1B/HIP1R/GPSM2/NCKAP1L/HCLS1/TESK1/ITGB1BP1/13/PSMC4/SET/PSMD10/PSMD11/PSMD1/PSMA7/EXOSC5/YWHAB/SAMD4B/PSMB3/AGO2/PSMD4/PSM1MB4/PDGFA/VANGL1/PSMB8/PSMB10/PSMA5/PSMD13/PSMC4/AP2M1/DVL2/PFN1/AP2S1/PSMD10/P/1AGO2/RPL35/RPS20/RPL18A/PPP1R15A/RPS19/RPS6KB2/RPLP0/RPL18/RPL23/EIF2B5/RPL38/1SAC3D1/CHMP4B/ESPL1/STIL/RGS14/CENPE/CHD3/PPP2R1A/CHMP4C/MSTO1/DYNC1H1/LZTS2/GP

D14/HLA-DPB1/CLTA/PSMD2/HLA-DQB2/HLA-A/CENPE/ITGB5/DYNLL1/DYNC1H1/PSMB2/PSME3/B1CNA/CCT2/HSP90AB1/E2F8/RFC2/DDX11/FGFR1/CCT4/PNKP/DBF4/CDK2/CCT7/RAC1/TCP1/WAS/

IL1B/PDGFA/TGFB2/NAP1L2/FGFR2/CIT/CDC42/TGFB3/CETN2/RACK1/SUSD2/SFRP2/KDF1/CALM  
C3/MARK2/CEP85/GPSM2/TUBB4A/RANGRF/PHLDB1/CAMSAP2/FKBP4/RAC1/CHORDC1/STMN3/RASS  
CCL5/CD86/TNFSF9/MIF/CD300A/ZP3/HLA-DPB1/EBI3/CD276/EFNB1/CD3E/SASH3/TNFRSF4/SL  
CLTA/PSMD2/HLA-DQB2/HLA-A/CENPE/ITGB5/DYNLL1/DYNC1H1/PSMB2/PSME3/LAG3/HLA-DQA2/  
LAMTOR5/CDK5/CTTN/SEMA4B/SLC12A7/SEMA4D/SEMA4F/SCTR/SEMA5B/AKT1S1/SEMA3C/SEMA3E  
8/KAT2A/TRIM71/TFAP2A/WNT4/MED12/OVOL2/LUZP1/RARG/ABL1/SFRP2/KDF1/RPS7/IFT172/B  
CLTA/PSMD2/HLA-DQB2/HLA-A/CENPE/ITGB5/DYNLL1/DYNC1H1/PSMB2/PSME3/LAG3/HLA-DQA2/  
/TUBB4A/CSNK1D/DCTN2/B9D2/HAUS8/NDRG4/RAB10/PLK4/ODF2/VPS18/SYT1/PPFIA3/CETN2/S  
/NCKAP1L/CAPZA1/MKKS/FHOD3/HCLS1/PSTPIP1/ARPC5L/RAC1/CTTN/MYADM/WAS/VIL1/PFN1/W  
WASF1/IFT80/BAG3/CDC42/APP/ACTL8/AP3D1/MYO5A/COPG1/NDE1/MAPT/BICDL2/TTC26/HSPB1  
IP1R/NCKAP1L/CAPZA1/MKKS/FHOD3/HCLS1/ARPC5L/CTTN/MYADM/WAS/VIL1/CIT/PFN1/WASF1/  
7/PSMB8/PSMB10/FGR/LCP2/PSMA5/WAS/PSMD13/PSMC4/PSMD10/PSMD11/PSMD1/PSMA7/PSMB3/  
EBI3/CD276/EFNB1/CD3E/SASH3/TNFRSF4/IRF1/CTLA4/PLA2G2D/NCKAP1L/SLC11A1/CD209/CA  
PSMD10/PSMD11/PSMD1/PSMA7/EXOSC5/YWHAB/SAMD4B/PSMB3/PSMD4/PSMD3/PABPC4/PSMD7/VI  
LRC5/CBFB/CD300LF/TAF9/PTPN6/AGPAT2/CASP1/SOCS3/RNF113A/IL1R2/PADI2/MAPK7/CARD1  
MAIP1/KMT5A/EHMT2/SSRP1/MTA2/CDK5/MAPK11/TAF9/PML/PSMD10/CHD4/RBBP4/BARD1/TOPBP  
/TCP1/SFPQ/PML/NAP1L2/ANAPC11/SMARCB1/RUVBL2/PRKD2/KAT2A/MTF2/RAD21/CCT8/GNL3/C  
3/SERPINE1/IL27RA/ZNF580/THY1/C3AR1/F2RL1/NCKAP1L/ADAM8/CCL2/CXCL13/LYN/CCL28/R  
JB2/GSK3A/ER01A/ZBTB17/BAG3/CALR/DNAJB11/HSPE1/PPP1R15A/RACK1/PDIA6/CXXC1/TBL2/  
IP1R/NCKAP1L/CAPZA1/MKKS/FHOD3/HCLS1/ARPC5L/CTTN/MYADM/WAS/VIL1/CIT/PFN1/WASF1/  
RCB1/RAE1/RPS3/TFAP4/RPL27/POLR2L/NUP155/RPL35/RPS20/NUP107/POLR2K/RPL18A/RPS19  
A5/PSMD13/PSMC4/FGFR2/RNF220/ATP6VOC/PSMD10/PSMD11/PSMD1/PSMA7/PSMB3/CTDNEP1/PS  
NELFE/POLR2H/PPIA/HDAC2/NELFB/CHMP3/OXTR/SMARCB1/TFAP4/SYDE1/POLR2L/AGO2/POLR2K  
BP/NASP/CENPI/SWI5/PSMC4/CENPK/NAP1L4/NAP1L2/PARP1/SET/SMARCB1/SMYD3/CDK7/RBBP4  
P2/CCT7/CHRA1/LIG1/TCP1/PHB/LOX/POLE4/POLA1/PRKD2/ARRB2/PARM1/POLQ/TELO2/UBE2L  
/DCTN2/B9D2/HAUS8/NDRG4/RAB10/PLK4/ODF2/VPS18/SYT1/PPFIA3/CETN2/STX4/RALB/CEP25  
PPP2R1A/SGO1/NDC1/FBXO5/SMC4/FANCA/NCAPH2/PSMD13/CYP26B1/TUBG2/CALR/TDRKH/MYBL1  
AH/BBC3/PMAIP1/ZNF205/SFPQ/LCK/GSK3A/PML/LTBR/TNFSF12/YWHAQ/YWHAB/RPS3/TFAP4/GZ  
ACTB/MTA2/KDM5B/NPM3/CENPI/CENPK/KDM5C/SMARCB1/ZMIZ2/PADI2/CHD4/RUVBL2/RBBP4/SM  
PML/PARP1/POLE4/POLA1/PRIM2/XRCC6/TELO2/RPA2/CCT8/GNL3/POLD3/RAD51C/PTGES3/NAT1  
D13/CD27/PSMC4/MAP3K14/PSMD10/PSMD11/PSMD1/PSMA7/RPS3/PSMB3/AKIP1/CALR/APP/PSMD  
0/PSMD11/PSMD1/PSMA7/EXOSC5/YWHAB/SAMD4B/PSMB3/PSMD4/PSMD3/PABPC4/PSMD7/VIM/TRI  
NGRF/YWHAH/BBC3/PMAIP1/ITGB1BP1/ACTB/CDK5/VIL1/AP2M1/STAC3/YWHAQ/YWHAB/ACSL3/PR  
AB11FIP4/ANXA11/CHMP3/CIT/KLHDC8B/CDC42/CHMP1A/CETN2/CKAP2/CALM2/ACTR3/CSPP1/SP  
8/RFC2/DDX11/FGFR1/PNKP/BLM/FBXO5/DBF4/CDK2/LIG1/PRIM1/WDHD1/DONSON/TIPIN/POLE4  
AA10/MAD2L2/CENPE/CHMP4C/NSMCE2/SPDL1/XRCC3/TGFA/KNTC1/PPP1R9B/CEP85/FBXO5/DAPK  
RPS3/TFAP4/CTSD/HSPE1/PDCD5/FADD/CLEC7A/RACK1/DAP/MAPT/PDCD6/CYCS/MTCH1/HSPD1/P  
MB4/PIAS3/PSMB8/TNFSF13B/PSMB10/PSMA5/COMMD7/PSMD13/CD27/PSMC4/CASP1/MAP3K14/PS  
/CARD11/GPRC5B/CCDC22/UNC5CL/IL1B/S100A13/TMEM101/CASP1/MAP3K14/SLC44A2/LTBR/PP  
5/LSM10/IL1B/DYNC1LI1/ANAPC11/CCND2/USP22/RANBP1/APP/MTBP/CUL4B/DBF4B/MEIS2/RAD  
RAE1/EIF4A3/NUP155/CPSF4/NUP107/CETN2/SLBP/HNRNPA3/CHTOP/SEC13/SYMPK/CPSF3/SARN  
L1/LCMT1/NAA10/MAD2L2/CENPE/CHMP4C/NSMCE2/SPDL1/XRCC3/TGFA/KNTC1/PPP1R9B/CEP85/  
OT9/CDKN2B/CCL2/CDK2/LSM10/KIF14/PTPN6/PML/CDKN2C/CCND2/MTBP/RFWD3/RPA2/CUL4B/B  
CAPH/NUP62/SPAG5/MAD2L1/RAN/KIF18A/CHMP4B/ESPL1/LCMT1/NAA10/MAD2L2/CENPE/PPP2R1  
PML/PARP1/POLE4/POLA1/PRIM2/XRCC6/TELO2/RPA2/CCT8/GNL3/POLD3/RAD51C/PTGES3/NAT1  
3/PSMC4/AP2M1/RAB10/DVL2/PFN1/AP2S1/PSMD10/PSMD11/PSMD1/PSMA7/PSMB3/ARRB2/CDC42  
LRC5/CBFB/CD300LF/PTPN6/AGPAT2/CASP1/SOCS3/RNF113A/IL1R2/PADI2/CARD16/IKBK/AXL  
S/FHOD3/HCLS1/ARPC5L/CTTN/MYADM/WAS/VIL1/PFN1/WASF1/CAPZB/GRB2/ARHGAP18/CDC42EP  
BLM/CNOT9/CDK2/THOC5/PML/DONSON/TIPIN/MSH2/TOPBP1/BABAM1/RFWD3/RAD9A/RPA2/NAE1/  
PSMC4/AP2M1/DVL2/PFN1/IFT80/AP2S1/PSMD10/PSMD11/PSMD1/PSMA7/PSMB3/ARRB2/CDC42/A  
3E/SASH3/IRF1/CTLA4/PLA2G2D/NCKAP1L/CD209/CARD11/IL1B/IL2RA/TNFSF13B/PTPN6/IL12

/BID/CNOT9/CDKN2B/CCL2/CDK2/LSM10/KIF14/PTPN6/PML/CDKN2C/CCND2/MTBP/RFWD3/RPA2/  
P31/NOC2L/NONO/BBC3/KDM1A/PMAIP1/WFS1/TAF9/SFPQ/LCK/PARP1/GPX1/RPS3/DNM1L/MAPK7  
2/BRSK1/PRKDC/MAD2L2/CNOT11/CHMP4C/BRCA1/PCNA/SPDL1/XRCC3/TICRR/KNTC1/E2F8/E2F4  
4/FANCA/NCAPH2/PSMD13/CYP26B1/CALR/TDRKH/MYBL1/RAD21/MSX1/WNT4/RAD51C/HSPA2/RAD  
/DNAJB6/NUP107/IER5/AKT1S1/DNAJC7/RBBP7/RPA2/MAPT/PDCD6/SEC13/PTGES3/HSPA2/VCP/  
/NCKAP1L/CD209/CARD11/IL1B/IL2RA/TNFSF13B/IL12RB1/IL15/RPS3/CD6/PNP/FADD/PELI1/  
4/PDCD5/TOMM40L/TIMM50/ROMO1/MAPT/HSPD1/TIMM13/MFF/BAD/HSP90AA1/CASP8/SH3GLB1/T  
IPIN/MSH2/BABAM1/RFWD3/RAD9A/RPA2/PRPF19/BTG2/PIDD1/DOT1L/EME2/CHEK2/CLSPN/RAD1  
39A10/NCKAP1L/CD209/CARD11/IL1B/IL2RA/TNFSF13B/IL12RB1/IL15/RPS3/CD6/PNP/FADD/P  
/BCL3/CNOT9/CDK2/KDM1A/PMAIP1/KMT5A/PML/PSMD10/TFAP4/GRB2/BABAM1/MSX1/PTTG1IP/P  
3/F3/CCR1/TUBB2B/C5AR1/PRKD2/CALR/XCL2/CMKLR1/SWAP70/STX4/LBP/CCL3/S100A7/CXCL1  
UP107/SLBP/PRPF31/CHTOP/SEC13/SYMPK/CPSF3/RPS15/NOL6/LTV1/SARNP/MAGOH/THOC2/EIF  
12/OVOL2/LUZP1/RARG/ABL1/SFRP2/RPS7/IFT172/BCL10/LMO4/MTHFR/KIF20B/TWIST1/CC2D2  
9/CXCL3/CXCL13/RAC1/IL1B/CCL4/TGFB2/C5AR1/PF4V1/CXCL11/XCL2/CMKLR1/WDR1/LBP/CCL  
N/CHMP4B/ESPL1/STIL/CENPE/CHMP4C/MSTO1/DYNC1H1/SPDL1/DYNLT1/GPSM2/KPNB1/DCTN2/P  
L2/LUZP1/RARG/ABL1/SFRP2/RPS7/IFT172/BCL10/LMO4/MTHFR/KIF20B/TWIST1/CC2D2A/STK3  
155/CPSF4/NUP107/SLBP/KHDRBS1/CHTOP/SEC13/SYMPK/CPSF3/RPS15/NOL6/LTV1/SARNP/MAG  
39A10/NCKAP1L/CD209/LYN/CARD11/IL1B/IL2RA/TNFSF13B/IL12RB1/IL15/RPS3/CD6/PNP/FA  
18/SGTB/RPL23/RPL38/RPL23A/RPS7/RPL7A/RPS23/RPS10/RPS15/SGTA/RPS16/RPL5/RPS27A/  
UP107/SLBP/CHTOP/SEC13/SYMPK/CPSF3/RPS15/NOL6/LTV1/SARNP/MAGOH/THOC2/EIF5A/POLR  
5/TOMM40L/TIMM50/ROMO1/MAPT/HSPD1/TIMM13/MFF/BAD/HSP90AA1/CASP8/SH3GLB1/TOMM22/  
/PARP1/SET/SMARCB1/ZNF207/MTF2/RAD21/NAT10/NBN/HNRNPU/ERCC1/EXOSC10/PIH1D1/HNRN  
2S1/PSMD10/PSMD11/PSMD1/PSMA7/PSMB3/ARRB2/CDC42/PSMD4/PSMD3/PSMD7/WDR1/MED12/PS  
XCL13/RAC1/ITGA2/PLA2G7/CCL4/GPSM3/CCR1/C5AR1/CALR/XCL2/CMKLR1/APP/SWAP70/FADD/  
2S1/PSMD10/PSMD11/PSMD1/PSMA7/PSMB3/ARRB2/CDC42/PSMD4/PSMD3/PSMD7/WDR1/MED12/PS  
AS/SWI5/SFPQ/PARP1/MCM8/POLQ/FUS/RFWD3/NABP1/RPA2/PPP4C/TIMELESS/RAD51C/RAD51D/  
GL1/CDC42/PRKCI/ACTL8/RACK1/NDE1/NSFL1C/WWC1/HSP90AA1/MPP7/PTK2/DCTN1/ARHGEF11/  
GB3BP/SMC4/NASP/AKAP8L/NCAPH2/CENPI/BANF1/CENPK/NAP1L4/NAP1L2/SET/SMYD3/RBBP4/C  
5/SFPQ/PARP1/MCM8/POLQ/FUS/RFWD3/NABP1/RPA2/PPP4C/TIMELESS/RAD51C/RAD51D/WRAP53  
G3/HSF2/PSMD4/PSMD3/RBX1/MAPK7/PSMD7/PSMD8/VHL/PSMA1/PSMB5/PSMA4/PSMD9/NOTCH1/R  
/RPS7/RPL7A/RPS23/RPS10/RPS15/RPS16/RPL5/RPS27A/RPS12/RPS4X/RPL6/EXOSC10/MAGOH/  
PSMD3/RBX1/MAPK7/PSMD7/PSMD8/VHL/PSMA1/PSMB5/PSMA4/PSMD9/NOTCH1/RPS27A/VEGFA/HS  
IL1B/CCL4/TGFB2/C5AR1/PF4V1/CXCL11/XCL2/CMKLR1/LBP/CCL3/S100A7/CXCL17/AKIRIN1  
X1/CUL4B/DNA2/CHD1L/DQX1/RPS27A/NBN/RAD18/UBA52/ACTR5/RFC5/DHX9/GTF2H1/RPA1/SMA  
/CD27/SAMSN1/MSH2/BTK/PELI1/GPR183/EXOSC3/FCGR2B/TNFAIP3/BAD/CD38/INHA/TP53BP1/  
CL4/TGFB2/C5AR1/PF4V1/CXCL11/XCL2/WDR1/LBP/CCL3  
CI/STX4/RACK1/CLIP3/STAC/STX7/CSK/VAMP8/TMBIM1/BCL2L1/RAB11A  
PSF3/SARNP/MAGOH/THOC2/EIF5A/POLR2D/RBM15B/SEH1L/THOC1/DHX38/ENY2/PABPN1/SRSF1/  
F207/KATNB1/NDE1/CLIP3/DRG1/MAPT/CKAP2/CKAP5/MZT1/ABL1/TBCD/STMN2/CCSAP/DCTN1/M  
PSF3/SARNP/MAGOH/THOC2/EIF5A/POLR2D/RBM15B/SEH1L/THOC1/DHX38/ENY2/PABPN1/SRSF1/  
3/RPS10/RPS15/SGTA/RPS16/RPL5/RPS27A/RPS12/RPS4X/RPL6/RPL37/RPL27A/HSPA5/RPL36/  
PSMD11/PSMD1/PSMA7/PSMB3/ARRB2/CDC42/PSMD4/PSMD3/PSMD7/MED12/PSMD8/ABL1/PSMA1/S  
D4/PSMD3/PSMD7/IKBKG/PSMD8/PSMA1/PSMB5/BCL10/PSMA4/PSMD9/PAK2/MUC6/MUC15/PSMC3/  
/NAP1L4/NAP1L2/SET/SMARCB1/SMYD3/PADI2/RBBP4/SMARCC1/CABIN1/HELLS/CENPN/RBBP7/S  
YD3/RBBP4/SMARCC1/CABIN1/CENPN/RBBP7/CENPQ/HAT1/ANP32E/MIS18A/DAXX/RNF8/SART3/A  
FWD3/RPA2/BTN2A2/BTG2/PIDD1/SUSD2/CHEK2/CDK2AP2/PLK3  
TOML2/RFC5/DHX9/FAF1/EREG/SMARCAL1/MSH6/ATG7/ATR/ATAD5/TTF1/UCN/CCDC88A/SLFN11/  
NC1H1/GPSM2/KPNB1/DCTN2/POC1A/MAP4/TUBG2/RAE1/KIF2A/PTPA/ZNF207/CHMP1A/WRAP73/D  
T5A/PML/PSMD10/TFAP4/MSX1/PTTG1IP/BTG2/PIDD1/CHEK2/NBN/PLK3/MY06  
D4/PSMD3/PSMD7/IKBKG/PSMD8/PSMA1/PSMB5/BCL10/PSMA4/PSMD9/PAK2/MUC6/MUC15/PSMC3  
0/RPS15/SGTA/RPS16/RPL5/RPS27A/RPS12/RPS4X/RPL6/RPL37/RPL27A/HSPA5/RPL36/UBA52/

PSMD1/PSMA7/PSMB3/ARRB2/CDC42/PSMD4/PSMD3/PSMD7/MED12/PSMD8/ABL1/PSMA1/SFRP2/PS5/RPL23/MYBBP1A/BTG2/PID1/CHEK2/PLK3/CRLF3/PPP2R5B/CDK5R1/FAP/CNOT10/CNOT3/TFDAG3/HLA-DQA2/CTSE/CAPZA1/DCTN2/HLA-DRB5/DCTN5/CTSS/KIF15/AP2M1/DYNC1LI1/AP2S1/K7/FGR/CDH17

R1/PF4V1/CXCL11/XCL2

RAD9A/RPA2/NAE1/BTG2/PID1/EME2/CHEK2/CLSPN/NBN/PLK3

8/KIF2A/RPS3/ZNF207/CHMP1A/WRAP73/RNF4/HAUS6/DRG1/MZT1/CHEK2/CCSAP/HAUS7/HNRNPUPDL1/XRCC3/DDX11/FBXO5/KNSTRN/SFPQ/DYNC1LI1/ANAPC11/CDC42/ZNF207

FWD3/RPA2/BTN2A2/BTG2/PID1/CHEK2/CDK2AP2/PLK3

AG3/HLA-DQA2/CTSE/CAPZA1/DCTN2/HLA-DRB5/DCTN5/CTSS/KIF15/AP2M1/DYNC1LI1/AP2S1/KRPL5/RPS27A/RPS12/RPS4X/RPL6/RPL37/RPL27A/RPL36/UBA52/RPL19/RPS11/RPL13A/RPL37AT172/BCL10/LMO4/MTHFR/KIF20B/TWIST1/CC2D2A/GLMN

CTSE/CAPZA1/DCTN2/HLA-DRB5/DCTN5/CTSS/KIF15/AP2M1/DYNC1LI1/AP2S1/KIF2A/CAPZB/CTREBF1/TIMM10/AIP/NDUFA13/VPS11/ATG13/HAX1/CSNK2A2/PARL/TIMM23/TIMM8B/HUWE1/PITRPSMD3/RBX1/PSMD7/RAD21/BABAM1/NAE1/PSMD8/PSMA1/CLSPN/PSMB5/PSMA4/PSMD9/NBN/ZFYV

36/HSPA14/ETF1/RPL19/EIF3E/RPL13A/RPLP1/DHX9/RPL32/RPL30/RBM24/DPH3/EIF3G/RPL29/PSMD7/IKBKG/SEC13/PSMD8/PSMA1/VAMP8/PSMB5/PSMA4/PSMD9/CANX/HLA-F/PSMC3/TAPBP/TRPS27A/RPS12/RPS4X/RPL6/RPL37/RPL27A/RPL36/UBA52/RPL19/RPS11/RPL13A/RPL37A/RPLPC1A/BRK1/ARPC5/ACTR3/SPIRE1

TMEM216/CEP41/HSP90AA1/DCTN1/CEP164/HAUS7/MARK4/HAUS5/DYNC1I2/RAB11A/NEDD1/CENP

IL12RB1/IL15/RPS3/CD6/PNP/FADD/RASAL3

P90AA1/PTK2/PTPN1/VEGFA/PAK2

/BTC/EREG/EGF/DAB2IP/SNX5/STAM/MVB12B/NEURL1/PDE6G/RNF126/RNF115/RAB7A/CHMP6/EPAT3/CCND3/ADAM17/GLI1/RAB11A/MECP2/STXB4/ANAPC5/UBE2E2/RPTOR/ATAD5/PAGR1/ANAPC

EK2/CLSPN/NBN/PLK3

RP2/THBS1/CSNK2A1/VEGFA/PAK2/PIH1D1/PRDX5

PTPN1/VDAC2/TXNDC12/IVNS1ABP/BCL2L1/NDUFA13

TAPBP/COG4/COPB1/BET1L/COPA/HTT/LMAN2/KLC1/RAB1A/ERGIC2/ATP9A/KIF3A/RAB1B/AP2B1/RBPJ/PSEN2/EPHA2/AP2A1/EPHB2/EPHA10

7/RAD21/NAE1/PSMD8/PSMA1/CLSPN/PSMB5/PSMA4/PSMD9/NBN/ZFYVE19/GPR132/PSMC3/PSMC5

B3/PSMD4/PSMD3/PSMD7/PSMD8/PSMA1/PSMB5/PSMA4/PSMD9/RPS27A/UBA52/PSMC3/PSMC5/ANA

/CDK5R1/FAP/CNOT10/CNOT3/TFDP1/DAB2IP/HMGA2

VEGFA/PAK2/PIH1D1/PRDX5

R3/HSP90AA1/PTK2/PLD2/WIPF2/RAPGEF1/ELMO2/CD247/CD3G/PTPRC/CLEC4E/PIK3CB/MY01C/R2B/CSK/ACTR3/HSP90AA1/PTK2/PLD2/WIPF2/RAPGEF1/ELMO2/CD247/CD3G/PTPRC/PIK3CB/MY

C13/PTGES3/BAG2/HSP90AA1/HIKESHI/DNAJC2/CCAR2/RPA1/SEH1L/ATR/RPTOR

KAPK5/RPA1/ATR/SMG7/DCP2/HNRNPC/MAPK15/TERF1/HNRNPA2B1/XRCC5/PARN/SLX4/TNKS1BP1

LLS/CENPN/RBBP7/CENPQ/HAT1/MIS18A/DAXX/SART3/ANP32B/SMARCA5/POLE3/IP04/HMGA2/PAOA

PSMD8/PSMA1/VAMP8/PSMB5/PSMA4/PSMD9/HLA-F/PSMC3/TAPBP/TAP2/PSMC5/PDIA3/PSMB1/PSRFC5/POLE3/RPA1/MSH6/POLE2/ATAD5



RAB11A/MECP2  
OAA1/PTK2/PLD2/WIPF2/RAPGEF1/ELMO2/CD247/CD3G/PTPRC/PIK3CB/MYO1C/NCKAP1/PLCG1  
SMG7/DCP2/HNRNPC/MAPK15/TERF1/XRCC5/TEP1/PARN/TNKS1BP1  
PC/MYC/MAPK15/TERF1/HNRNPA2B1  
OAA1/PTK2/PLD2/WIPF2/RAPGEF1/ELMO2/CD247/CD3G/PTPRC/PIK3CB/MYO1C/NCKAP1/PLCG1  
6/SURF6/DHX30/AAMP/NIP7/RPL24/RPL11/RPL10/WDR12/HEATR3/MRPL20/RPL14/RPL10A/ZNHI  
DIA4/NXN

AMP8/PSMB5/PSMA4/PSMD9/HLA-F/PSMC3/TAPBP/TAP2/PSMC5/PDIA3/PSMB1/PSMB6/PSMA3/HLA  
S18A/ACTR5/RNF8/SMARCA5/DMAP1/POLE3  
/TP53BP1/HMGA2/ATAD5/THOC1/TFIP11/TRIM32/ING2/DYRK3/TMEM161A/HELB/ACKR3

IM27/IRF4/PDE4B/CD4/ANXA1/CCR2  
PL24/RPL11/RPL10/ERAL1/MRPL20/RPL12/MRPS2/RPS28/C1QBP/MRPS11

GRE2

8A/DAXX/SART3/ANP32B/SMARCA5/POLE3/IPO4/GRWD1  
DCP2/HNRNPC/MAPK15/TERF1



Q/DOK2/ARHGEF39/TIMP2/WASF2/TRIM28/RHOC/PLEKHG2/RAB6B/VAV1/RAB32/ARFGEF3/DOK1/G  
T2/LEF1/NELFE/RPS6KA4/FBL/MT3/OTUB1/NOC2L/HDAC2/CDK2/KDM1A/KMT5A/HCF1/EHMT2/AK  
2/SCRIB/RHOG/TBC1D16/RANGAP1/S100A10/RABEP2/CCL5/VAV1/CCL26/IQGAP1/EFNA5/RGS14/  
1/CDC25C/GDF15/IRAK1/CDKN2A/S1PR2/CD74/PKN1/DUSP5/PRKCD/ROBO1/HSPB1/NCK2/SLAMF8  
NA/SNAP25/ARHGEF2/P2RX4/ROBO1/SERPINI1/PLXNA3/SMARCD3/HES6/NME1/NBL1/ITPKA/NAP1  
/ITPKA/NAP1L1/EZH2/NME2/TWF2/ASPM/ANKRD1/TRPV2/GRN/TIMP2/TCF3/P3H1/CXCR4/IQGAP1  
1A2/CLCF1/C1QB/SUSD4/BIRC3/ITGB2/IRAK1/C1QC/CD74/CMTM3/PKN1/PTAFR/PRKCD/LAT2/C1  
C1/PRKCD/ROBO1/ADORA1/PRNP/ADAM9/HRAS/SYK/STK39/IL18/EZH2/DLG3/CSF1R/MAGED1/NCF  
C51B/NPC1/GALNT18/B3GNT7/GFPT2/CHPF2/MAN1B1/PLOD3/B4GALT3/B3GALNT1/ST3GAL4/SOAT  
2K2/PAK1/PRKX/HSP90AB1/DYRK2/CSNK1E/MARK2/DDIT4/RPS6KA4/CNOT9/MBOAT4/CSNK1D/CDK  
PK2/VAV1/COLEC12/CD300A/UNC93B1/PRKDC/PSMD2/PAK1/MNDA/IRF1/IRF3/F2RL1/RAB7B/LRR  
DFI/S100A10/DDIT3/DTNBP1/TRAF2/HMGB2/TRIM6/HMOX1/TRIM28/BAX/MAP2/FKBP1A/GMNN/MA  
P/ABCB6/LAMA5/CNFN/EDA/PALLD/HDAC1/KRT18/FERMT1/COL5A2/CAPN1/HDAC2/KRT8/ASAH1/J  
SMD2/PAK1/MNDA/IRF1/IRF3/F2RL1/RAB7B/LRRC14/NPLOC4/PSMB2/IRF7/PSME3/TNIP2/FLOT1  
/DUOX2/IRF3/F2RL1/STAT1/NPC2/NPLOC4/POLR3K/ODC1/DDIT4/AGBL5/IRF7/PIM2/ZC3H12A/B  
/LAMA5/RAB3B/CNPY4/KRT18/SLC9A3R1/FLOT1/RANGRF/ITGB1BP1/EHD2/ACTB/RAP2A/CDK5/MY  
YNLT1/LAMP3/TRIM31/SNF8/PLSCR1/NELFB/APOBEC3G/CCL4/CHMP3/IFI16/BANF1/PML/SMARCB  
CBP2/BCAP31/UBE2J2/NPEPPS/EHD1/HCLS1/ITGB1BP1/IL1B/EHD2/CDK5/UBE2L3/FGR/GSK3A/C  
ATF4/PMAIP1/PSMB4/PSMB8/PSMB10/GNB1/PSMA5/DNMT3A/PSMD13/PSMC4/PSMD10/PSMD11/ERO  
S/ADAM8/ATF4/PMAIP1/PSMB4/PSMB8/PSMB10/GNB1/PSMA5/DNMT3A/PSMD13/PSMC4/PSMD10/PS  
/ZSWIM5/CORO1B/FGFR1/NCKAP1L/CCL2/CXCL13/LYN/RAC1/ITGA2/PLA2G7/CCL4/GPSM3/F3/CC

ROCC/CAPZB/RALA/CDC42/TGFB3/ZMYND8/CDC42EP2/WRAP73/BRK1/AKIRIN1/PALM/ARAP1/TBC1  
5/MSX1/TAF10/DOT1L  
RP2/RPS7/IFT172/BCL10/LMO4/MTHFR/KIF20B/TWIST1/CC2D2A/STK3/GLMN  
/DQX1/RPS27A/NBN/RAD18/UBA52/ACTR5/RFC5/DHX9/GTF2H1/RPA1

/SWAP70/LBP/CCL3/S100A7/CXCL17/AKIRIN1/CYP19A1/SLC8B1/THBS1/ADAM17  
CKAP2/CKAP5/STMN2/CCSAP/MAP1A/ADD3/LIMA1/DSTN/PLEKHH2/GAK/MTPN/SPTAN1/CAMSAP1/C  
EGF/DAB2IP/SNX5/STAM/MVB12B/NEURL1/PDE6G/RNF126/RNF115/RAB7A/CHMP6/EPN1/AFAP1L2  
AKIRIN1/THBS1/ADAM17/VEGFA

/EGLN2/UBA52/PSMC3/PSMC5/RBPJ

R2/SNUPN/SMN1/USP4

7/RUVBL1/MAD2L2/PSMD2/FZD1/PYGO2/BCL9/PPP2R1A/IGFBP6/EDA/MLLT3/SMARCA4/ARHGEF19  
HARPIN/GNA12/ISG15/PDCL3/DDA1/HSP90AB1/NPLOC4/CSNK1E/MAN1B1/PSMB2/PSME3/HSPBP1/  
GIPC1/DDIT3/CTSK/RBCK1/PSMD14/FBXL19/CHMP4B/VPS37C/MSN/CLTA/UBE2Z/PSMD2/NUPR1/R  
M20/TOMM34/SHARPIN/GDAP1/SLC35F6/TIMM17B/BMF/NOL3/MSTO1/LMNA/MYO19/GGCT/NDUFAF2  
A10/FSCN1/CARMIL1/WASF2/RHOC/PLEKHG2/CCL26/PHPT1/ARPC4/SH3PXD2B/SLC9A1/EFNA5/PA  
100A10/TFRC/HLA-DPA1/HLA-DMB/TNFRSF18/CARMIL1/JAK3/CCL5/CD86/APBB1IP/VAV1/ITGA5  
K1/PRKX/HSP90AB1/DYRK2/CSNK1E/MARK2/DDIT4/RPS6KA4/CNOT9/CSNK1D/CDK2/HCLS1/AXIN1  
1/IRF3/F2RL1/RAB7B/LRRC14/NPLOC4/PSMB2/IRF7/PSME3/TNIP2/FLOT1/SMPDL3B/CD209/LYN  
83/TFE3/PRELID1/LEF1/IRF7/ZC3H12A/LAG3/NCKAP1L/ADAM8/EVI2B/HCLS1/FANCA/MITF/LYN  
EF1/ZC3H12A/BCL3/LAG3/NCKAP1L/JAG2/ADAM8/PRR7/PIK3CD/KDEL1/FANCA/CARD11/CBFB/I  
/MRPS34/TRMT112/VIL1/MRPL13/NES/KIF2A/CAPZB/SWAP70/SH3GL1/KATNB1/GADD45GIP1/WDR  
A/CD27/CCR1/IL12RB1/IL15/IL4R/PNP/LILRB4/AP3D1/AXL/FADD/BTK/BTN2A2/SART1/TOX/BA  
MD11/PSMD1/PSMA7/PSMB3/CTDNEP1/PSMD4/TRPM4/PSMD3/PSMD7/TBL1XR1/CSNK1G2/JRK/PSMD  
2A/TRIM71/WNT4/MED12/OVOL2/LUZP1/RARG/ABL1/SFRP2/RPS7/IFT172/BCL10/LMO4/NOTCH1/  
7A/RACK1/DAP/MAPT/PDCD6/CYCS/MTCH1/HSPD1/PIDD1/VCP/TRADD/BAD/BCL10/TNFSF15/CASP  
/WNT4/LFNG/RAD1/ACVR1B/NOTCH1  
A/CHMP1A/RANBP1/CETN2/CEP250/HAUS6/PARD6G/NDE1/CKAP5/NSFL1C/DCTN1/HAUS7/FBXW5/M  
/WASF1/RPS3/GRB2/CDC42EP2/GMFG/ABI2/DRG1/MAPT/ARPC1A/BRK1/ARPC5/ACTR3/HSP90AA1/  
6/CYCS/MTCH1/HSPD1/PIDD1/VCP/TRADD/BAD/BCL10/TNFSF15/CASP8/PDCD2/PPM1F/NDUFA13/  
/KAT2A/CHMP1A/RANBP1/CETN2/CEP250/HAUS6/PARD6G/NDE1/CKAP5/NSFL1C/DCTN1/HAUS7/FB  
E2L6/TRIM25/POLR3D/POLR3H/POLR3C/HSPD1/TNFAIP3/RNF216/MAVS/IRF5/TLR2/TRIM21/NMI  
HAB/ACSL3/PRKCI/GZMB/PDCD5/STX4/RACK1/CLIP3/CEMIP/MFF/STAC/BAD/CASP8/RAB11A/CAC  
E2L6/TRIM25/POLR3D/POLR3H/POLR3C/HSPD1/TNFAIP3/RNF216/MAVS/IRF5/TLR2/TRIM21/NMI  
L/FADD/BTK/HCAR2  
BAD/HSP90AA1/CASP8/TMEM11/TOMM22/BNIP3L/RCC1L/BCL2L1/TIMM10/NDUFA13/YWHAG/TFDP1  
IF20B/TWIST1/CC2D2A/GLMN

1  
K5R1

XM1/YBX3/EIF5A2/CCL5/DPH2/CNOT11/MAPK3/HSPA8/EIF3B/RPL36A/MRPL17/HM13/NPM1/UPF3  
M6/DTX3/TRIM28/FKBP1A/UBE2M/UBE2Z/PRKDC/MAD2L2/PSMD2/HIF1A/TRIM11/RNF34/UBE2Q2/  
HARPIN/GNA12/ISG15/PDCL3/DDA1/HSP90AB1/NPLOC4/CSNK1E/MAN1B1/PSMB2/PSME3/HSPBP1/  
HMP4B/VPS37C/UBE2Z/PSMD2/NUPR1/RHBDF1/RNF34/UBE2I/RNF19B/SHARPIN/HM13/GNA12/ISG  
7/RUVBL1/MAD2L2/PSMD2/FZD1/PYGO2/BCL9/PPP2R1A/IGFBP6/EDA/MLLT3/SMARCA4/ARHGEF19  
DA/GNPDA1/TYMS/GPC4/GPC3/UCK2/AGRN/SDC3/HK2/PFKFB4/VCAN/PIGU/B3GAT3/UPP1/NME1/G  
15/IRAK1/ZDHHC13/S1PR2/CD74/PKN1/DUSP5/P2RX4/ROBO1/NCK2/ADORA1/ADAM9/HRAS/SYK/P  
T5/GBGT1/FUT4/B3GNT9/SLC51B/NPC1/GALNT18/B3GNT7/GFPT2/CHPF2/MAN1B1/PLOD3/B4GALT  
A1/MAPK3/MICALL1/MAP2K2/PPP2R1A/ATP8B2/BAIAP2L1/CHMP4C/CORO1C/STX6/HGS/BIN1/LMN  
G15/CHMP4C/TNFRSF4/ITGB5/PPIH/TRIM59/NPC1/HSP90AB1/PABPC1/NUP93/NUP205/NUP37/ND  
JMJ6/CD3E/TCIRG1/SASH3/TPD52/SOCS1/IRF1/CTLA4/CD83/PLA2G2D/PRELID1/LEF1/ZC3H12  
2/GBP5/CARD9/PSMB9/CTSK/PSMD14/HMGB2/TRIM6/CCL5/MAPKAPK2/VAV1/COLEC12/CD300A/ZP  
SNK1E/E2F4/TMEM237/SNX10/CEP89/CCNO/UNC119B/EHD1/HAUS1/SPAG1/RSPH1/TUBB4A/CSNK1  
DNAJC5/CASP2/UBE2M/SLC9A1/HIF1A/NUPR1/FZD1/XRCC2/HSP90AB1/HYOU1/DDIT4/BID/MT3/A  
RHOG/CFL1/RHOQ/S100A10/FSCN1/CARMIL1/WASF2/RHOC/PLEKHG2/CCL26/PHPT1/ARPC4/SH3PX  
SNK1E/E2F4/TMEM237/SNX10/CEP89/CCNO/UNC119B/EHD1/HAUS1/SPAG1/RSPH1/TUBB4A/CSNK1

PK3/ADGRG1/BIN1/HDAC1/RELN/S100B/MBOAT7/LEF1/MYRF/MT3/CCL2/HDAC2/LYN/CNTNAP1/MX

SF9/GBP2/PSMD2/MAPK3/SHARPIN/TNFRSF4/BRCA1/EDA/NOL3/CD58/F2RL1/STAT1/CCL13/TNFR  
M1/IRF3/F2RL1/STAT1/HDAC1/S100B/CARD19/PIM2/TGM2/ZC3H12A/EEF1D/TNIP2/BCL3/CPNE1  
TF4/KIF14/CLN3/ATN1/CDK5/WFS1/TGFB2/CIT/PARP1/SET/NSMF/NES/C5AR1/MSH2/ARRB2/PRK  
C1/ZC3H12A/TNIP2/CD68/CCL2/CXCL9/CXCL3/CXCL13/LYN/IL1B/CASP1/PF4V1/SBN02/CD6/CX  
CA1/BCL2L12/NOL3/LMNA/HDAC1/DDIAS/HYOU1/PRELID1/PSME3/BID/NOC2L/NONO/NLE1/KDM1A

/CD6/APP/CLEC7A/CCT8/HVCN1/SPA17/VDAC2/CDK5R1/ROBO3/DOCK2/CCL19/CD5/EPHB2/CNR1/  
G20/APOBEC3D/TNIP1/TRIM25/SRPK1/NOTCH1/MAVS/OAS3/TRIM21/TARBP2/VPS37B/PPIE/PPIB  
/APP/SLBP/EXOSC3/SUPT5H/CHTOP/SYMPK/CPSF3/SARNP/EXOSC9/EXOSC10/MAGOH/EXOSC7/THO  
DROSHA/KAT2A/IL4R/PNP/LILRB4/AP3D1/BTN2A2/ABL1/SART1/HLA-DOA/BAD/PTPN2/NKAP/RHO  
1/RHOT2/SLC25A5/MFF/BAD/VPS35/CASP8/BNIP3L/BCL2L1/YWHAG/IFI6/CCAR2/GCLM/TFDP1/T  
/VPS37B/PPIE/POLR2I/PPIB/POLR2J/POLR2D/DHX9/KPNA6/NELFA/POLR2E/CAV2/SUPT4H1/NEL  
RHGDIA/SEMA3E/ABL1/ARAP1/PTPN1/PDLIM4/CD2AP/RHOA/MINK1/PARVB/NOTCH2/RHOBTB2/HAX  
/SRF/FNBP1L/DPYSL3/EPS8L1/CCL19/HTT/ATP7A/DZIP1/NCKAP1/PLEKHM1/CCDC88A/NEURL1/F  
IF20B/TWIST1/CC2D2A/GLMN  
TLR7

HARPIN/GNA12/PDCL3/DDA1/HSP90AB1/NPLOC4/CSNK1E/MAN1B1/PSMB2/PSME3/HSPBP1/BCAP31  
KA/CTSV/WFDC2/ADA/GNPDA1/CLGN/CDC25C/PAQR5/BIRC3/CEP131/PI3/CDK16/RACGAP1/NCAPH  
TK/GAL3ST1/TGFB1/FAM50A/AURKA/STC2/CTSV/WFDC2/ADA/HAVCR2/CDC25C/PAQR5/BIRC3/CEP  
TK/GAL3ST1/TGFB1/FAM50A/AURKA/STC2/CTSV/WFDC2/ADA/HAVCR2/CDC25C/PAQR5/BIRC3/CEP  
C1/DTNBP1/SAE1/HMOX1/TRIM28/NUTF2/MAP2/CD300A/MTCL1/MSN/STXBP2/MAPK3/OAZ1/LCP1/

/IQGAP1/RGS14/MAPK3/MAP2K2/PPP2R1A/PAK1/PEA15/SPRED1/FPR1/HGS/TGFA/TNFRSF11A/FG  
3B/PSMB2/ZNF703/PPP1CA/LEF1/SFRP5/PSME3/SLC9A3R1/DVL3/FERMT1/PLEKHA4/FRAT2/DAPK

F1R/EZR/ANKRD1/VTCN1/RAN/ANXA13/CCT6A/MICALL2/CCT3/SAE1/TRIM6/TRIM28/NUTF2/PHPT  
E2M/HIF1A/NUPR1/FZD1/XRCC2/HSP90AB1/HYOU1/DDIT4/MT3/ADAM8/NONO/CCL2/ATF4/KIF14/  
F703/PPP1CA/SFRP5/PSME3/SLC9A3R1/DVL3/FERMT1/PLEKHA4/DAPK3/CSNK1D/AXIN1/NLE1/GP

RL1/STAT1/HDAC1/S100B/CARD19/PIM2/TGM2/ZC3H12A/EEF1D/TNIP2/CPNE1/SLC35B2/CARD11  
ZTS2/GDI1/MT3/CPNE1/WNT7B/TNC/CDK5/KDM5B/CTTN/RNF157/FGFR2/WASF1/SEMA4B/SEMA4D/  
/WFS1/TGFB2/PARP1/SET/NSMF/NES/C5AR1/MSH2/ARRB2/PRKCI/TGFB3/AXL/AKT1S1/NAE1/TFA  
LDOC1/PAM/ARHGDIB/FKBP4/ITGA2/DAZAP1/IL1B/MAGED2/ADRA2C/CALCA/PTGFR/BYSL/OXTR/V  
IM59/NPC1/PPIA/ZC3H12A/DYNLT1/RPSA/TRIM31/KPNB1/CD209/ITGA2/TCP1/THOC5/XPR1/CHM  
/LIMCH1/CORO1B/HIP1R/NCKAP1L/TESK1/ITGB1BP1/ARPC5L/RAC1/CD47/CTTN/WAS/VIL1/PFN1  
PIAS3/CDK5/WFS1/UBE2L3/DNAJB2/GSK3A/VPS28/UBE2D1/PSMD10/RPS3/ARRB2/DCUN1D5/DNM1  
/CAPZB/RALA/CDC42/TGFB3/ZMYND8/CDC42EP2/WRAP73/BRK1/AKIRIN1/PALM/ARAP1/TBC1D7/D  
A/ITGA2/CDK5/TXN/PLXND1/PARP1/APP/MED25/RALB/STPG1/MFNG/LFNG/ABL1/SPPL3/NVL/CTB  
I3/RAB3A/RCC1L/VPS11/STXBP1/TAPBP/TAP2/GOSR2/SNAPIN/MFN1/BET1L/NAPG/ATG7/SAMD9L  
5/THRA/VEGFA/SMAP1/SRF/INHA/BPGM/KITLG/MAEA/LDB1/PKNOX1/RPS14/INPP5D/ZNF16/ADD1  
CD47/PTPN6/ARRB2/APP/AXL/FADD/CLEC7A/LBP/CCL3/TNFAIP3/NFATC4/CD33/BCL10/THBS1/M  
6/CXXC1/TBL2/ATP6V0D1/HSPA2/VCP/SRPRB/WIPI1/TATDN2/PTPN2/DCTN1/PTPN1/OPTN/COPS5

6/MUC15/POMGNT2/SLC35C2/XXYL1/SDF2L1/EOGT/GCNT1/B3GNT8/ST3GAL2/SDF2/TMTC2/ST6G  
/CCRL2  
/CCRL2

7/AKIRIN1



K11/CD19/TNFSF13

IL13RA2/CD84/PLEKHM1/ADGRE2/VPS33B/FAM98A/CHGA/RASGRP1/MYH9/TFEB

HGAP25/APPL2/RAC3/MYH9/CHMP4A/ALKBH4

IF/CD300A/PKDCC/IQGAP1/EFNA5/MAPK3/CD3E/MAP2K2/PPP2R1A/FGFR4/RAP2B/THY1/PDCL3/S  
IF/CD300A/PKDCC/IQGAP1/EFNA5/MAPK3/CD3E/MAP2K2/PPP2R1A/FGFR4/RAP2B/THY1/PDCL3/S  
/CCL26/TNFSF9/GBP2/PSMD2/MAPK3/SHARPIN/TNFRSF4/BRCA1/EDA/NOL3/CD58/F2RL1/STAT1/  
/LY86/PPARD/LDOC1/ZC3H12A/TNIP2/CD68/CCL2/CXCL9/CXCL3/CXCL13/LYN/IL1B/WFS1/CASP  
H12A/TNIP2/CD68/CCL2/CXCL9/CXCL3/CXCL13/LYN/IL1B/CASP1/PF4V1/SBN02/CD6/CXCL11/C  
/EXOSC3/NAT10/FAM98B/FARSA/GTPBP3/ADAT3/PUS7/DUS2/GTF3C5/CTU2/POP5/EXOSC9/EXOSC  
S1/ABCG1/LARP4B/NAT10/MPV17L2/THBS1/RPL5/PLK3/JMJD4/RPS4X/RCC1L/TARBP2/EIF5A/EI  
CD47/PTPN6/ARRB2/APP/AXL/FADD/CLEC7A/LBP/CCL3/TNFAIP3/NFATC4/CD33/THBS1/MAVS/TL

1/ARAP1/PTPN12/PTK2/PTPN2/ADAM17/IFI6/HBEGF/BTC/EREG/EGF/DAB2IP/SNX5/PLCG1/STAM

C13/TARBP2/POLR2I/POLR2J/PPHLN1/POLR2D/DHX9/SEH1L/POLR2E/MORC2/PPARG/ADAR/AAAS/

C1/DHX38/PABPC1L/PABPN1/SRSF1/SRSF2/PAF1/CASC3/FIP1L1/RBM8A/CSTF3/MAGOHB/ZNF473

P36/NMT1/HTRA2/ARIH2/UBL5/BAP1/TP53

S14/RPS27/DDX52/RPS6/RIOK1/RPS24/ERAL1/RPS28/RPS17/NOL11/TSR1/MRPS11  
SR1

/PSRC1/HAVCR2/CLCF1/SQSTM1/CD44/GDF15/IRAK1/S1PR2/CD74/PFKFB4/PKN1/DUSP5/ARHGEF  
ABEP2/CCL5/VAV1/CCL26/IQGAP1/RGS14/ANKRD27/THY1/ARHGAP9/CORO1C/F2RL1/ARHGEF19/C  
TB/MEG3/DNMT3A/NUP85/IFI16/ATAD2/NUP43/RAE1/ZMIZ2/GPX1/PADI2/XPO5/RBBP4/SRRT/HE  
T3/B3GALNT1/ST3GAL4/MT3/EXTL3/B4GALT7/MUC3A/KRTCAP2/RPN2/B4GALT2/POMT2/FUT3/MUC  
T3/B3GALNT1/ST3GAL4/MT3/EXTL3/B4GALT7/MUC3A/KRTCAP2/RPN2/B4GALT2/POMT2/FUT3/MUC  
JB2/GSK3A/VPS28/UBE2D1/PSMD10/RPS3/ARRB2/DCUN1D5/DNM1L/PELI1/MTBP/RPL23/PTTG1IP  
ITGA2/DAZAP1/IL1B/MAGED2/ADRA2C/CALCA/BYSL/OXTR/VDR/UBE2A/SYDE1/AGO2/CALR/TGFB3

L12RB1/MSH2/IL4R/SWAP70/GPR183/EXOSC3/MFNG/HSPD1/LFNG/ABL1/FCGR2B/PTGER4/NBN/TM  
ARRB2/APP/AXL/FADD/CLEC7A/LBP/CCL3/TNFAIP3/NFATC4/CD33/THBS1/MAVS/TLR2  
ARRB2/APP/AXL/FADD/CLEC7A/LBP/CCL3/TNFAIP3/NFATC4/CD33/THBS1/MAVS/TLR2/TWIST1/D  
SN1/LST1/IL4R/GAL/AXL/BTK/PELI1/BTN2A2/FCGR2B/TNFAIP3/TWSG1/PTPN2/IL20RB/HLA-F/

AC10/SPIRE1/MAGEF1/UIMC1/UBR5/TWIST1/APBB1/RNF8/DHX9/TIGAR/UBE2N/MMS19/TP53BP1/

1/RHOA/ACTN4/EPHB2/RYK/FSTL4/SEMA3F/DMTN/TRIM46/SEMA6B/SEMA4C/PTPRS/TRAK2

RELA/POLR1C/POLR3A/TRIM15/XRCC5/RNF135/ZBP1/TICAM1

A4/ADORA1/MVP/HRAS/SHKBP1/SYK/PLCB1/ATP6V1F/NUP62/HCK/GPC1/PGF/DDR1/CDK4/GIT1/C  
BIRC3/CEP131/CDK16/RACGAP1/NCAPH/FANCD2/NDRG3/NUP62/ASPM/ZNF296/SPAG4/SLC26A6/T  
CD/HSPB1/NCK2/PRNP/MVP/NUP62/CD109/WNK2/MAD2L1/DNMT1/EZR/CDKN2D/MGAT5/IGFBP3/DT  
A/IGFBP6/EDA/MLLT3/SMARCA4/HDAC1/CSNK1E/LZTS2/FAM53B/PSMB2/ZNF703/TMEM237/PPP1C  
8/CAPN1/PIP4K2A/ATP6V1H/SNF8/CLN3/VDAC1/ATP6V1E1/GBA/LAMTOR5/CAPNS1/CDK5/LAMTOR

PP2R1A/RAP2B/THY1/PDCL3/SOCS1/TGFA/RELN/NCAPG2/FGFR3/SHC1/HDAC2/HCLS1/LYN/GPRC5  
/CSNK1E/DDX11/MARK2/PPP1CA/LEF1/LDOC1/PIM2/HIP1R/FLOT1/KDM1A/ITGB1BP1/ACTB/CDK5

R1/WAS/CHMP3/NDRG4/RAB10/VPS28/SNX27/MVB12A/PTPN23/CHMP1A/PLEKHJ1/TMEM50A/VPS25  
RF1/IRF3/HSP90AB1/STAT1/RAB7B/CCL13/IRF7/ACTG1/HLA-DQA2/CCL2/TRIM31/DAPK3/NLRC5  
JB2/POMT2/GSK3A/ERO1A/ZBTB17/BAG3/CALR/DNAJB11/HSPE1/PPP1R15A/RACK1/PDIA6/CXXC1  
TPN6/CD27/IL12RB1/CYP26B1/IL15/DROSHA/KAT2A/IL4R/PNP/LILRB4/AP3D1/AXL/BTK/BTN2A  
AP3D1/AXL/FADD/BTK/BTN2A2/SART1/TOX/BAD/CASP8/TMEM64/NKAP/RHOA/AP3B1/RUNX3/ZMIZ

A/CBL/ABL1/ARAP1/PTPN12/HSP90AA1/PTK2/PTPN2/ADAM17/CDC37/IFI6/LGMN/HBEGF/RBPJ/B

KLE2/EMD/WRAP53/NSFL1C/SRPK1/LEMD2/DCTN1/ZPR1/NEK6/RNF8/SEH1L/VPS4A/NECTIN2/SRP  
ACVR1B/CSNK2A1/CSNK2B/LMTK2/MAP3K10/DGKQ/CDK5R1/PARD3/SBK1/EGF/RPTOR/CALM3/CSNK

5/PELI3/PSMD8/PSMA1/PSMB5/PSMA4/PSMD9/RPS27A/UBA52/PSMC3/PSMC5/UBE2N/IRAK2/VRK2

MBIM1/BCL2L1/RAB11A/CLTC/EPHA2/MRAP2/EPHB2/CIB1/VPS4A

1/YTHDF2/METTL3/PSMB1/PSMB6/PSMA3/PSMB7/ERCC2/ACE/XRCC5/SETD1A/TP53/PSMD12/KMT2

CL1/CCL8/INPP5D

/PSRC1/HAVCR2/CLCF1/SQSTM1/CD44/GDF15/IRAK1/S1PR2/CD74/PKN1/DUSP5/ARHGEF2/PRKCD  
/DLG3/CSF1R/MAGED1/NCF1/TRAF2/CCL5/MAPKAPK2/CXCR4/MIF/CD300A/IQGAP1/CARD10/EFNA

D13/PSMC4/COPS7B/UBE2D1/USP14/PSMD10/PSMD11/PSMD1/PSMA7/USP1/TRAF3/PSMB3/BARD1/  
TTN/ZNF205/GSK3A/PSMD10/GPX1/YWHAQ/YWHAB/BAG3/ARRB2/INF2/GZMB/DNM1L/PDCD5/MAPT/  
/CHMP1A/PIP4K2C/WRAP73/RNF4/RALB/DRG1/NPRL3/TBC1D7/PRKAA2/DNM2/TCTEX1D2/CCSAP/S

1/PSMB5/PSMA4/PSMD9/PUS7/NOTCH1/HNRNPU/PSMC3/PSMC5/RBM24/OSM/LDB1/YTHDF2/METTL3

3/SMARCD3/NME1/NBL1/ITPKA/NAP1L1/UNC13D/EZH2/NME2/TWF2/ASPM/ANKRD1/TRPV2/GRN/S1  
/MAPK8IP2/CSF1R/NECTIN1/UNC5B/EZR/BSG/DCDC2/TRPV2/CTNND2/CRMP1/CFL1/DOK2/DTNBP1  
WF2/ASAP1/ASPM/ANKRD1/ESRP1/TRPV2/GRN/CRMP1/CFL1/LINGO1/TIMP2/TCF3/P3H1/CXCR4/S  
/MAPK8IP2/CSF1R/NECTIN1/UNC5B/EZR/BSG/DCDC2/TRPV2/CTNND2/CRMP1/CFL1/DOK2/DTNBP1  
CMTM3/PTAFR/PRKCD/LAT2/C1QA/RELB/IGLL5/HLA-DRB1/PRNP/HRAS/SYK/HLA-DQA1/HCK/IL18  
PA2G4/ZC3H12A/NCBP2/BCL3/EIF3D/CNOT9/DAPK3/ATF4/ITGA2/EIF2S3/MRPL13/GCN1/CDC123  
ST1/ROBO1/SERPINI1/ITIH5/SYK/CD109/SERPINH1/CSTB/S100A8/ASPH/CASP4/CDKN2D/IFT57  
RNASE6/GRN/CARD9/APOBEC3C/HMGB2/TRIM6/SLFN13/UNC93B1/NT5C3A/GBP2/MAPK3/TRIM11/S  
2/RPS6KA1/IGFBP3/BDKRB1/ATAD3A/CXCR4/SEMA4A/MAP2/SLC9A1/EFNA5/MAD2L2/PPP2R1A/PA

D13/PSMC4/UBE2D1/USP14/PSMD10/PSMD11/PSMD1/PSMA7/USP1/TRAF3/PSMB3/BARD1/ARRB2/U  
OD3/B4GALT3/B3GALNT1/ST3GAL4/MT3/EXTL3/B4GALT7/MUC3A/KRTCAP2/RPN2/GBA/B4GALT2/P

DAPK3/TESK1/STK17B/LYN/RAP2A/CDK5/PDGFA/FGR/LCK/TNIK/SLA/FGFR2/PRKD2/STK10/BTK/  
CL3/SHC1/CXCL13/DEFB1/SLC11A1/JCHAIN/FGR/RPL39/COCH/C5AR1/GSDMD/DROSHA/TLR5/RPS

/CD300LF/PTPN6/SAMSN1/LST1/ABR/CST7/IL4R/GAL/AXL/BTK/PELI1/BTN2A2/FCGR2B/TNFAIP  
F675/RGS3/STK38/PKIA/ABL1/SFRP2/TNFAIP3/PTPN1/DUSP7/PRKAR1B/YWHAG/GPS1/HEG1/DUS

TXBP1/TAPBP/TAP2/GOSR2/SNAPIN/MFN1/SAMD9L/CAV2/VPS4A/VPS16/C2CD5/RAB8B/VPS8/TSN

/CHEK2/BAD/PIAS4/TMEM109/BCL2L1  
SD/MMP19/VIM/WNT4/EMILIN1/CIITA/RCN3

METTL3/PSMB1/PSMB6/PSMA3/PSMB7/SETD1A/PSMD12/KMT2A/PSME2/MYB/PSMD6/GATA3/PSMC2/IP11/SPIRE2

B1/ITGAM/RHOV/PPT1/FCGR3A/DKK1/UNC119/CORO1A/SLC39A4/FOLR1/ANKRD13D/GPC3/FCH01/NL2/CSF1R/EZR/TRPV2/RHOG/FMNL1/CFL1/RHOQ/S100A10/LINGO1/CARMIL1/RHOC/CXCR4/SEMA/DLG3/CSF1R/MAGED1/NCF1/TNFAIP8L3/TRAFF2/CCL5/MAPKAPK2/CXCR4/MIF/CD300A/IQGAP1/C

MA5/CNFN/EDA/PALLD/HDAC1/PLOD3/KRT18/PPARD/FGFR1/SLC9A3R1/FERMT1/JAG2/CAPN1/HDA

/ALKBH4

GR/PLXND1/VIL1/COCH/LST1/CDC42SE1/FGD6/CDC42/ARHGAP18/CDC42SE2/SEMA4D/CDC42EP2/OPG1/NDE1/MAPT/BICDL2/TTC26/HSPB11/RHOT2/IFT172/COPG2/TCTEX1D2/BICD1/HNRNPU/MAP OPG1/NDE1/MAPT/BICDL2/TTC26/HSPB11/RHOT2/IFT172/COPG2/TCTEX1D2/BICD1/HNRNPU/MAP 7/PPP5C/AXL/BTK/STK25/RACK1/ROMO1/MAPT/ABL1/TNFAIP3/PDCD10/PSAP/DNM2 ACVR1B/CSNK2A1/CSNK2B/LMTK2/MAP3K10/DGKQ/CDK5R1/PARD3/SBK1/EGF/RPTOR/CALM3/CSNK SPD1/TNFAIP3/CSK/CAPN2/MAVS/TLR2/TWIST1/DHX9/ADORA2B/EREG/TLR7/IL17D/INPP5D/TLR

1/MRPL11/MRPL15/C12orf65/MRPL4/MRPS24/MRPL33/MRPS5/MRPL36/MRPL14/OGFOD1/MRPL3/E

/CCL19/PIK3R6/INPP5D/PTPRC/NFKBID/IFNG/ANXA1/PPP2R3C/CD80/RASGRP1/LILRB2/NLRP3/TPRC/FIGNL1/SUPT6H/ERCC2/HELB/TNFSF13/ACTR2

R01A/FOLR1/ANKRD13D/GPC3/FCHO1/ITGB2/SNAP25/PRKCD/TRIP10/ITGAV/SCAMP5/IL15RA/IG  
PAG4/SLC26A6/HSF1/KIF18A/WIPF3/LIMK2/HMGB2/YBX3/EIF5A2/BAX/NROB1/SNRPA1/FANCG/R  
D2/NPM1/UPF3B/POLR2G/NSMAF/BIN1/RBM3/PABPC1/TRNAU1AP/ORMDL2/PPP1CA/PA2G4/ZC3H12  
3/PMAIP1/WFS1/DNAJB2/POMT2/GSK3A/PML/USP14/ERO1A/ZBTB17/DNAJC10/CALR/DNAJB11/PP  
IRF3/HSP90AB1/F2RL1/NPLOC4/CD83/LEF1/RPS6KA4/SERPINB1/FGFR1/ZC3H12A/BCL3/LAG3/N

SLC26A11/SLC37A2/SLC4A3/XPR1/SLC4A11/LRRC8B/BEST1/TTYH2/SLC12A7/SLC26A2/GABRD/P  
LBP/HSPD1/TNFAIP3/CSK/BCL10/CAPN2/MAVS/TLR2/TWIST1/DHX9/ADORA2B/EREG/TLR7/IL17D

RG3/CD79B/INHA/LYL1/RBPJ/NOTCH2/DOCK10/DCLRE1C/INPP5D/HDAC5/PTPRC/IKZF3

/JMJD4/RPS4X/RCC1L/TARBP2/EIF5A/EIF3E/RPUSD3/NSUN4/RHOA/POLR2D/DHX9/COA3/EIF6/R

K5R1/SRF/IST1/ADNP/RYK/FSTL4/SEMA3F/MEGF8/TRIM46/SEMA6B/SEMA4C/PTPRS/SHTN1/TTL/

/IL20RB/GLMN/TNFRSF14/IDO1/RUNX3/XCL1/DUSP22/LOXL3/NFKBID/CASP3/ANXA1/ARG2/LILR

M/PLIN5/SCP2/FABP1/ACADL/ACOX2/SLC27A2/EHHADH

/DDB1/COPS8/TCEA1/POLR2B/ERCC2/LIG3/COPS7A/POLD2  
2/CD7/GPC3/GDF15/IRAK1/EIF4EBP1/SHCBP1/PRKCD/ROBO1/HSPB1/COL4A5/NCK2/ITGAV/EFNA

K8IP2/CSF1R/NECTIN1/UNC5B/EZR/BSG/DCDC2/TRPV2/CTNND2/CRMP1/CFL1/DOK2/DTNBP1/LIN



PAG4/SLC26A6/HSF1/WIPF3/LIMK2/HMGB2/YBX3/EIF5A2/BAX/NROB1/SNRPA1/FANCG/RUVBL1/P  
/ITIH5/SYK/CD109/SERPINH1/CSTB/S100A8/ASPH/CASP4/CDKN2D/IFT57/RPS6KA1/HSF1/CARD

4/TACSTD2/CAPZB/DGUOK/SEMA4B/SEMA4D/SEMA4F/SEMA5B/ARHGDIA/VIM/SEMA3C/PMP22/SEMA  
90AB1/STAT1/RAB7B/CCL13/IRF7/ACTG1/HLA-DQA2/CCL2/TRIM31/DAPK3/NLRC5/RAB20/HLA-D  
A2A/DNM1L/SYT3/STX4/CSPG5/RAB3D/FCGR2B/VAMP8/C12orf4/NOTCH1/CD177/RAB3A/HLA-F/T

KNOX1/RPS14/INPP5D/ZNF16/ADD1/ACIN1/RPS6/CASP3/ADAR/SMAD5/MFHAS1/RPS24/HOXB6/AN

NNA1/C1QTNF6/HBE1

5/KITLG/OSM/LDB1/YTHDF2/METTL3/PSMB1/PSMB6/PSMA3/PSMB7/SETD1A/PSMD12/KMT2A/PSME  
NA4/VASP/ITPKA/GPC1/UNC13D/TWF2/MAPK8IP2/CSF1R/NECTIN1/UNC5B/EZR/BSG/ZNF385A/DC  
LOD2/NUP205/NUP37/PLOD3/LEF1/NDC1/NELFE/RPS6KA4/NUP188/TGM2/NOC2L/HDAC2/KDM1A/K

A2B1/ELAVL1/PAIP1/TARDBP/C1QBP/SRSF10/RNF40/SRSF7  
3H12A/FERMT1/FRMD8/LYN/CARD11/IL1B/S100A13/FGR/LCP2/MAPK11/CASP1/PML/IL1R2/ANXA  
R1/PMAIP1/RNASE2/IL1B/IL2RA/APOBEC3G/RNF26/PQBP1/IFI16/MAP3K14/PML/IL12RB1/IL15  
EPPS/HSPA4/YWHAH/MCU/BBC3/PMAIP1/UBE2L3/ZNF205/GSK3A/YWHAQ/YWHAB/BAG3/STARD3/GR  
SMD3/PSMD7/DPF2/KCNAB2/ESCO2/PSMD8/ABL1/PSMA1/PSMB5/PSMA4/PSMD9/PUS7/NOTCH1/PDC

/VIM/SEMA3C/PMP22/SEMA3E/CBFA2T2/STMN2/NFATC4/DENND5A/PTK2/RAB29/IFRD1/CDK5R1/R

LRC5/KDM1A/CCDC22/WFS1/COMMD7/PSMD10/ANXA4/TRAF3/ARRB2/CMKLR1/PELI1/ZNF675/DAP/

T3

PG4/CEMIP/EXT1/BCAN/B4GALT4/ACAN/CHST3/CLTC/GPC2/HEXA/AP2A1/EGF/B3GALT6/HS6ST2/

EHHADH/DAO/HAO2/HAO1/AGXT

DH4/CYP3A4

HAVCR2/GSTP1/GPC3/FLNA/BIRC3/IRAK1/PI3/BATF/CCDC88B/PTAFR/COTL1/PRKCD/HSPB1/SLA  
ECTIN1/UNC5B/EZR/BSG/DCDC2/TRPV2/CTNND2/CRMP1/CFL1/DOK2/DTNBP1/LINGO1/CXCR4/SEM  
HAVCR2/GSTP1/GPC3/FLNA/BIRC3/IRAK1/PI3/BATF/CCDC88B/PTAFR/COTL1/PRKCD/HSPB1/SLA  
PA8/RPL36A/TOMM34/AP4M1/DKC1/SEC61G/ACD/GDAP1/TIMM17B/BMF/HGS/CCT2/RPS2/LMNA/TS

1/COL3A1/LAMC1/FZD7/MICALL2/PLAU/S100A10/CARMIL1/EPDR1/ITGA5/IQGAP1/SLC9A1/EFNA

7/TNFAIP8L2/VTCN1/VSIG4/JAK3/CD86/CD300A/EFNA5/MAD2L2/ADAMDEC1/SERPINE1/CORO1C/

/VPS33B/EXO6/UNC13A/EXO6B/STX16/STX8/STX12/STX5/STXBP3/STX2/STX11

TACSTD2/CAPZB/KAT2A/SWAP70/KATNB1/GMFG/CLIP3/CKAP2/TBCD/STMN2/ARAP1/ADD3/LIMA1/

S4A/VPS16/C2CD5/RAB8B/VPS8/TSNARE1/VAMP3/KIF5B/ANXA1/VAMP1/NKD2/RAB7A/VAV3

7C/ATP6V1C1/RRAGD/FOXK1/FUNDC1/HIF1A/MAPK3/NUPR1/HSPA8/RRAGC/TCIRG1/MAP1S/CHMP4  
HAVCR2/GSTP1/GPC3/FLNA/BIRC3/IRAK1/PI3/BATF/CCDC88B/PTAFR/COTL1/PRKCD/HSPB1/SLA  
6KA1/ATIC/YBX3/EIF5A2/CCL5/MTHFD1L/DPH2/B4GALT5/PDP1/CNOT11/MAPK3/EIF3B/RPL36A/  
7C/ATP6V1C1/RRAGD/FOXK1/FUNDC1/HIF1A/MAPK3/NUPR1/HSPA8/RRAGC/TCIRG1/MAP1S/CHMP4

RL1/HYAL2/CHMP6/ACE/AFAP1L2/TSG101/WNT3A/ABI1/SOCS5/SNX6  
/IL18/PAG1/HLA-DRA/HLA-DQB1/SLAMF7/VTCN1/TFRC/HLA-DPA1/HLA-DMB/TRAF2/JAK3/CD86/  
/NAIF1/CNP/THEM4/NMT1  
AB3C/DMTN/VPS33B/VAMP1/EXO6/CADPS2/UNC13A

/PSMA1/PSMB5/BCL10/PSMA4/PSMD9/PAK2/PSMC3/MAP3K1/PSMC5/PIK3CB/PSMB1/PLCG1/MAP3K

V2/GRN/CRMP1/DOK2/LINGO1/CXCR4/SEMA4A/NDN/MAP2/DOK1/BRSK1/B4GALT5/EFNA5/MAPK3/E  
/HMOX1/TCF3/BRMS1/NROB1/TRAF5/FLOT2/NFKB2/MAD2L2/MAPK3/NUPR1/FZD1/TMIGD3/NPM1/T  
/MORF4L1/MORC2/HDAC5/TRIM27/PHF1/SETDB1/MBD2/ASF1A/LHX2/MBD1/SUZ12/MSL3/EZH1/JA  
188/ZC3H12A/CSE1L/CCT4/BCL3/FERMT1/SIX2/KPNB1/HCLS1/CCT7/CDK5/TXN/TCP1/NUP85/PM  
1A/FGFR1/DVL3/ADAM8/SHC1/WNT7B/BIRC7/IL1B/PDGFA/MLKL/MAPK11/MAP3K14/TNIK/DVL2/M  
/CTTN/RNF157/GSK3A/WASF1/SEMA4B/SEMA4D/SYT1/APP/GAL/SYT3/SEMA4F/SEMA5B/SEMA3C/S

AT

KLKB1/C4BPA/F12/CFHR5/F9/KNG1/C6/CFHR4/SERPINC1  
NFRSF10A

TF2F1/CTDP1/TRIM32/TRIM27/TRIM62/POLR2B

3GLB1/OPTN/CDC37/STOML2/VPS11/YWHAG/ATG13/TFDP1/HTT/CSNK2A2/HUWE1/BIK/DDHD1/PLA  
P3A4

L19/TLR7/LITAF/MAP3K7/COPS8/RTKN2/AGO1/RELA/NOD1/NOD2/CARD14/RASSF2/TNFRSF10A

/CALR/AXL/CSPG5/LIMS1/ABL1/SGAP2/DNM2/PTK2/OLFM4  
AC5/BMP2/CTDP1/CXCL10/PIN1/TRIM32

K16/KCNJ11/PRKCD/SLC7A11/SCAMP5/B3GAT3/PRNP/ADAM9/HRAS/SYK/NUP62/GTSE1/CCT5/TMS  
FOXK2/PIM2/ZC3H12A/MT3/ATG101/MLST8/TRIM65/CAPN1/PIP4K2A/LAMP3/ATP6V1H/DAPK3/VD

E1/TAF13/TBP/POLR2E/GTF2F1/EXOSC2/RPRD1A/GTF2A2/ZNF143/POU2F1/POLR2B/POU2F2/SNA  
CD4/IFNG

BID/IFNG/ANXA1/CD80/RASGRP1/LILRB2/NLRP3/IL12A/ZBTB7B/SOCS5/MYB/ZAP70/MALT1/HLA  
1/ATP6VOC/ATP6VOE1/BAG3/IKBK/PIP4K2C/RALB/ATP6VOD1/RUBCN/RHEB/SUPT5H/PAFAH1B2/  
F/SEMA5B/STK25/ARHGDIA/SEMA3C/SEMA3E/MAPT/CHN1/ABL1/KEL/DBNL/PLXNC1/DNM2/PTK2/V

1/PDIA6/CXXC1/TBL2/ATP6VOD1/HSPA2/VCP/SRPRB/WIPI1/TATDN2/PTPN2/DCTN1/PTPN1/OPTN  
CTB/DNAJB2/IFI16/NES/EIF4A3/RUVBL2/TFAP4/ARRB2/ANKRD33/CARD16/HEY1/GZMA/ZNF675/

LR2/ALOX15B/TWIST1/GLMN/IL17RA/TNFRSF14/DHX9/CCL19/OSM/IL17RB/PANX2/CLEC4E/CRLF  
2/ST3GAL5/PIGT/RACK1/CSNK1G2/CERS6/HACD1  
/CAV2/CAV1/THOC1/THOC7/MVB12B/AAAS/THOC3/TRIM15/RAB7A/NUP214/TSG101  
/CAV2/CAV1/THOC1/THOC7/MVB12B/AAAS/THOC3/TRIM15/RAB7A/NUP214/TSG101

SC10/HNRNPA1/RFC5/MAPKAPK5/DNAJC2/TFDP1/ATR/PPARG/SMG7/HNRNPD/DCP2/HNRNPC/MYC/M

IRAK1/S1PR2/CD74/PKN1/DUSP5/PRKCD/ROBO1/ITGAV/ADORA1/ADAM9/HRAS/SYK/PLCB1/STK39  
LA-DRB1/PRNP/HRAS/SYK/HLA-DQA1/HCK/PAG1/S100A8/HLA-DRA/MUC1/EZR/HLA-DQB1/VTCN1/  
/HCK/TMSB4X/CDK4/TWF2/EZR/TRPV2/COMP/CFL1/HNF1B/CARMIL1/HMOX1/PLEKHG2/SLC12A2/V  
2/MDFI/PSMB9/DDIT3/PSMD14/HNF1B/GRK6/PTK7/RUVBL1/MAD2L2/PSMD2/FZD1/PYG02/BCL9/P  
DI1/FGFR1/DYNLT1/DVL3/VLDLR/KDM1A/LYN/RNF157/PLXND1/NDRG4/TUBB2B/DVL2/LRP8/PRKC

PS8/TSNARE1/VAMP3/KIF5B/ANXA1/VAMP1/NKD2/RAB7A/VAV3  
PS5/MRPL36/MRPL14/MRPL3/ERAL1/AURKAIP1/MRPL20/MRPL24/MRPS16/MRPL55/CHCHD1/MRPS2  
R2/POLR2K/TRIM71/PIWIL4/SEC13/TSN/TARBP2/POLR2I/POLR2J/POLR2D/DHX9/CNOT10/SEH1L

APZB/SWAP70/KATNB1/GMFG/CLIP3/CKAP2/EMILIN1/TBCD/STMN2/ARAP1/ADD3/LIMA1/EML2/AR  
/TBC1D7/BCL10/PIAS4/MASTL/HSPA5/CHFR/NMI/RASSF5/SART3/UBE2N/PEF1/CAV1/STUB1/RAB  
/TRMT12/TP53RK/CTU1/TSEN34/TPRKB/TYW3/TSEN15/DPH3/RPP30/TRMT2B/CDK5RAP1/RTCB/ME  
PRB/WIPI1/TATDN2/PTPN2/DCTN1/PTPN1/COPS5/HSPA5/CANX/PPP2R5B/GFPT1/TLN1/GOSR2/TP  
/BCAN/B4GALT4/ACAN/CHST3/CLTC/GPC2/HEXA/AP2A1/EGF/B3GALT6/HS6ST2/HS2ST1

/TWF2/ADAM15/CDKN2D/TRPV2/RPS6KA1/IGFBP3/BDKRB1/ATAD3A/CXCR4/SEMA4A/SIRT6/NDN/M

ASH3/BASP1/GDI1/PPARD/LEF1/FGFR1/EXTL3/MKKS/WFS1/RNF157/TGFB2/TAF9/VIL1/FGFR2/C  
C2/ZC3HAV1/LARP1/SRPK2/IFITM2/DBP1/MX1/VAPA/TBC1D20/ADAR/SETDB1/APOBEC3F/FAM111  
PS5/MRPL36/MRPL14/MRPL3/ERAL1/AURKAIP1/MRPL20/MRPL24/MRPS16/MRPL55/CHCHD1/MRPS2

RAF3/ARRB2/TLR5/IKBKG/FADD/BTK/PELI1/TNIP1/LBP/HSPD1/TNFAIP3/MAPKAPK3/BCL10/CAS  
BAM1/CBL/RFWD3/NABP1/RAD9A/XRCC4/SFRP2/BRAT1/CHEK2/RAD1/VCAM1/DNM2/ERCC1/TMEM10

POA5/APOC3/CPS1/G6PC/CYP2E1/SLC27A5/PCK1

/ATP6V0E1/SLC9A7/TMEM199/ATP6V0D1

OTUB1/CCL2/PSMB4/IL1B/CD47/PSMB8/PSMB10/PSMA5/CCL4/MAPK11/TAF9/PSMD13/PSMC4/PSM

/PLA2G15/SMPD4/A4GALT/PRKD2/FUT6/ST3GAL5/RACK1/ITGB8/CSNK1G2/CERS6/HACD1

POX/ACSM5/PDK4/HMGCS2/ACSM2B/ACSM2A/GLYAT

POX/ACSM5/PDK4/HMGCS2/ACSM2B/ACSM2A/GLYAT

UWE1/C2CD5/MY01C/USP36/DMTN/HTRA2/ARIH2/UBL5/BAP1

/SEN5/NUP214/MUL1/BCL11A/TPR/NUP50/HMG20B/NUP133/RASD2/GNL3L/PIAS2/NUP35/RWDD3

9A10/PPP2R2C/UBASH3B/DUSP23/PPM1G/CTDSPL/PPP6R1/HSP90AB1/PTPN7/RCAN3/PPP1R9B/PP

ETFDH/ACOX1/ACAA1/IVD/ACAA2/ABHD1/IRS2/HSD17B4/GCDH/ACAT1/AMACR/ACADM/PECR/PLIN

/ADH1C/CYP2C8/ADH1B/ADH4/CYP3A4

I2/ETFDH/ACOX1/ACAA1/IVD/ACAA2/IRS2/HSD17B4/GCDH/ACAT1/AMACR/ACADM/DGAT2/PECR/P

A/PML/CDKN2C/SEMA4B/SERTAD3/SEMA4D/GAL/SEMA4F/SEMA5B/NME6/RACK1/MSX1/RBBP7/SEMA

E/PPARG/ADAR/AAAS/AGO1/POLR2B/FXR1/EIF4G1/ELAVL1/ZMPSTE24/NUP214/MYCN/MAEL/TP53  
E/PPARG/ADAR/AAAS/AGO1/POLR2B/FXR1/EIF4G1/ELAVL1/ZMPSTE24/NUP214/MYCN/MAEL/TP53

I2/ETFDH/ACOX1/ACAA1/IVD/ACAA2/IRS2/HSD17B4/GCDH/ACAT1/AMACR/ACADM/DGAT2/PECR/P  
3/ZNF473/TTF1/PRMT5/SMN2/POLR1C/ERCC2/ZMPSTE24/ZNRD1/TWISTNB/XRN2/PAPOLA/SMN1/C

SOCS1/CEP85/DUSP2/FBXO5/CDKN2B/TESK1/LYN/ITGB1BP1/CDKN1C/DUSP4/DBNDD2/IL1B/GBA/

CYP4A11/CYP2E1/CYP2C8/SLC27A5/CYP2C9/CYP2A6/CYP3A4

2/SARDH/PRODH2/GPT/HAAO/HGD/SDS/ADHFE1/AASS/ALDH8A1/AMDHD1/AGXT2/MAT1A/PIPOX/PA

ATSF1/OAS3/RAB29/TARBP2/CXCR6/PPIE/PPIB/IFITM3/CTBP1/CCL8/HMGA2/PARP10/MORC2/ZC

1/PDCD2/HNRNPU/VEGFA/NKAP/TEAD3/KITLG/ARTN/MECOM/DAGLB/HMGA2/PTPRC/YTHDF2

IRAK1/S1PR2/CD74/PKN1/DUSP5/PRKCD/ROBO1/ITGAV/ADORA1/ADAM9/HRAS/SYK/PLCB1/STK39

PAK1/PEA15/FPR1/CKS1B/HSP90AB1/TGFA/TNFRSF11A/FGFR1/DVL3/MLST8/DBF4/ADAM8/SHC1/



SF3A2/FZD1/PAK1/CRABP2/ANKRD27/NRCAM/RELN/CSNK1E/MARK2/GDI1/FGFR1/DYNLT1/DVL3/V

SIN1/XKR8/FNBP1L/CAV2/CAV1/PTPRC/ATP2A2/ABCA7/NOX1/SYT11

ITGB1BP1/CDKN1C/DUSP4/DBNDD2/IL1B/GBA/CHORDC1/PTPN6/SOCS3/PPP1R1B/SMYD3/CDKN2C/

L3/IFITM2/MX1/ADAR/IRF4/HLA-C/HLA-E/MUL1/ZBP1/WNT5A/LSM14A/CACTIN/UBE2K/BST2/IR  
L3/IFITM2/MX1/ADAR/IRF4/HLA-C/HLA-E/MUL1/ZBP1/WNT5A/LSM14A/CACTIN/UBE2K/BST2/IR  
/NUP107/RPL23/SNRPG/PTTG1IP/IP013/PKIA/MAVS/HIKESHI/ZPR1/HNRNPA1/UBR5/PRKAG1/TN

LR2J/POLR2D/DHX9/SEH1L/EIF6/POLR2E/PRKRA/SPOUT1/MIR155HG/METTL3/PPARG/MOV10/PPP  
/TMEM98/NVL/MAVS/CD2AP/ZPR1/UBR5/RASSF5

FC5/POLR2D/GPS1/GTF2H1/RPA1/MMS19/POLR2E/ERCC3/DDB1/COPS8/TCEA1/HUS1/POLR2B/ERC  
16/ADD1/ACIN1/RPS6/CASP3/ADAR/SMAD5/MFHAS1/ANKRD54/DMTN/DYRK3

/APP/GDPD5/HEY1/SLC35C1/RPS19/GMDS/MFNG/TRAF7/LFNG/CBFA2T2/PDCD10/WWC1/IFT172/T

MA4F/SEMA5B/SEMA3C/SEMA3E/MAPT/ABL1/VCL/RASAL1/DBNL/HSP90AA1/DNM2/LLPH/VEGFA/RA  
/KAT2A/MTF2/ZNF335/CHTOP/MTHFR/HNRNPU/VEGFA/SREBF1/PIH1D1/MECP2/UBR5/TWIST1/PPH

71/MED12/OVOL2/LUZP1/RARG/ABL1/SFRP2/RPS7/IFT172/BCL10/LMO4/NOTCH1/FKBP8/MTHFR/

RIM25/CIITA/VCAM1/PTPN2/IRF5/OAS3/TRIM21/HLA-F/CDC37/NMI/NR1H2

NMT1

AB3C/RAB33A/RAB2A/RAB7A/RAB6A/RAB28

4/WNT5A/WNT3A

S2/APOC3/ADH1A/ADH1C/CYP2E1/CYP2C8/CYP2C9/ADH1B/ADH4/CYP3A4

A7

/POP7/KPNB1/RNASE2/RPS21/POP1/CPSF1/EDC3/PARP1/RRP36/CPSF6/ISG20/EXOSC5/DFFA/DN  
CD33/CASP8/S1PR3

1B/CASP1/MAP3K14/LTBR/PIEZ01/BAG3/CNN2/TLR5/FADD/ANGPT2/LRP11/PKD1L2/MEIS2/COL1

CK1/ABL1/STK24/TNFAIP3/PDCD10/BAD/PSAP

/TSG101/TPR/NUP50/BST2/NUP133/VPS37A/UBC/NUP35/XPO1

1/TIMELESS/ABL1/TNFAIP3/PDCD10/PSAP/CFTR/HSPA5/HNRNPA1/DAXX/ANKZF1/ADCY6/BECN1/

LIP3/TBCD/STMN2/TMC8/PTGER4/LMO4/STYXL1/VPS35/THRA/VDAC2/ADD3/EML2/RPL13A/STXBP  
L3/IFITM2/MX1/ADAR/IRF4/HLA-C/HLA-E/MUL1/TRIM56/ZBP1/WNT5A/LSM14A/CACTIN/UBE2K/  
R/NUP50/BST2/NUP133/VPS37A/UBC/NUP35/XPO1

NMI/GLMN/INHA/SIGIRR/EREG/TLR7/INPP5D/PTPRC/TLR8/IRF4/CD4/IFNG/RELA/CCR2/NOD1/T

OCS1/TGFA/MARK2/MT3/NCKAP1L/MLST8/PAK4/SHC1/KIF14/AXIN1/SLC11A1/WNT7B/ITGB1BP1/

CES2/GHR/RORC/AKR7A3/CYP3A5/CES3/CYP2A7/AADAC/PON3/UGT2B15/NR1I2/GSTM1/FMO3/CYP

NF2/ZNF335/BTG2/AKNA/CTNNA1/NOTCH1/VEGFA/PSMG1/TARBP2/TEAD3/RHOA/RAPGEF1/IFT20

4/SEMA4A/NDN/MAP2/DOK1/BRSK1/B4GALT5/EFNA5/MAPK3/EFNB1/MAP1S/PAK1/CRABP2/NRCAM/  
R1/RNF19B/PERP/FGFR4/DDA1/CSNK1E/PRELI1/HIP1R/ZC3H12A/PSME3/BID/HSPBP1/BCAP31/

GM2/BCAP31/KISS1/SRI/CXCL9/CXCL13/GIPR/LYN/CCL28/FPR3/CDK5/GNB1/CXCR3/LCK/PTPN6

D1/TLR1/NOD2/AFAP1L2/MAPKBP1/WNT5A/C5AR2/ARRB1/CACTIN/SSC5D

A1

PD3/FMOD/GPD2/MAN1B1/ITPA/PDE9A/NAGK/GBA/APOBEC3G/GNS/GNPDA2/ADAMTS9/GSK3A/GALN

IGAR/CCAR2/UBE2N/MMS19/ATR/HMGA2

A/TMED9/SORT1/STX10/SNX10/BLOC1S4/FBX05/CSNK1D/SNF8/RAB20/LAMTOR1/RNF26/CHMP3/A

/FABP4/MOGAT2/APOA1/APOA5/APOC3/CPS1/G6PC/CYP2E1/SLC27A5/PCK1  
CYP1A2/AKR1D1/TTR/HSD17B6/ADH1A/ADH1C/CYP2C8/CYP2C9/ADH1B/ADH4/CYP3A4  
1/OR2A14/OR3A1/OR10H3/OR51D1/OR52B2/OR7C2/OR10H4/OR4D5/OR13D1/OR52K2/OR52A1/OR6  
ALB/GSTM1/GSTA1/ADH4

/LYN/CBFB/PIAS3/CCR1/LOX/LILRB4/FADD/ZNF675/CCL3/MEIS2/RARG/ACVR1B/PTPN2/THBS1/  
R2I/POLR2J/INTS4/POLR2D/TAF13/TBP/POLR2E/GTF2F1/TAF1B/PWP1/RPRD1A/GTF2A2/ZNF143

/ADAT3/PUS7/WTAP/DUS2/CTU2/BMT2/SEPHS1/TRMT12/RPUSD3/NSUN4/TGS1/CTU1/TPRKB/RNMT  
OOK2/SYS1/DCTN1/VPS35/ARFRP1/RGP1/LMTK2/RAB29/TMEM87A/VPS11/CLTC/AP1S1/GAK/GOSR

/INHA/SIGIRR/EREG/TLR7/INPP5D/PTPRC/TLR8/IRF4/CD4/IFNG/RELA/CCR2/NOD1/TLR1/LILR  
T8/ASAH1/JAG1/CBFB/CAPNS1/FA2H/CYP26B1/EVPL/VDR/MAFF/KRT20/S100A7/OVOL2/KDF1/KR

RG/AAAS/AGO1/POLR2B/FXR1/EIF4G1/ELAVL1/ZMPSTE24/NUP214/MYCN/MAEL/TP53/TPR/NUP50

L11/NXN/PARK7/RELA/ARRB1/OGT/TRIP12/TRIM44/HMG20B/HSPA1A/GPS2/USP4/RASD2/GNL3L/

F3/DARS2/MRPL51/MRPL11/COA3/YARS2/MRPL15/MRPL4/MRPS24/MRPL33/CDK5RAP1/MRPS5/MRP  
/ARF1/STEAP2/VPS26A/VAMP3/ARL3/VPS29/BLZF1/EXOC6/GRIPAP1/GGA2/EXOC6B/ARHGAP44/O

6VOD1/CFTR/SLC4A7/SNAPIN/VPS33A/ATP6V1B2/SLC9A6/SLC9A9/TM9SF4

5D/ACIN1/MYC/BGLAP/CD4/IFNG/ESRRA/RASSF2/LILRB1/GNAS

LGAPB/BCR/TBC1D25/DOCK7/TSC1/RASGRP1/PIP5K1A  
ZC3HAV1/SRPK2/IFITM2/MX1/TRIM32/VAPA/TRIM27/SETDB1/APOBEC3F/FAM111A/TRIM15

4B/NSFL1C/WIP1/HOOK2/VPS35/SH3GLB1/FIG4/HEXB/GNPTAB/VPS11/ATG13/IFT20/TPP1/ATG  
2/POLR2I/POLR2J/POLR2D/DHX9/SEH1L/EIF6/POLR2E/PRKRA/SPOUT1/MIR155HG/METTL3/PPAR

IM46/CNIH2/TRAK2/BICD2/RAB6A/NEFH/RASGRP1/FEZ1/NEFL

LETM1/CCL3/CEMIP/ABL1/CALM2/PLCB2/SLC8B1/GRIN2D/MCOLN3/PLA2G1B/JPH1/CACNB3/TRPV  
/FABP4/MOGAT2/APOA1/APOA5/APOC3/CPS1/G6PC/CYP2E1/SLC27A5/PCK1  
/PDCD5/CEMIP/EMD/MFF/PDCD10/PLK3/SH3GLB1/MAVS/EDEM2/ZPR1/RAB29/KIF20B/CACNB3/CD

/OPN1SW/SLC9A1/MAPK3/ASIC1/NPM1/GNGT1/PCNA/BMF/IRF1/COPS9/E2F4/EEF1D/BLM/NOC2L/  
/OPN1SW/SLC9A1/MAPK3/ASIC1/NPM1/GNGT1/PCNA/BMF/IRF1/COPS9/E2F4/EEF1D/BLM/NOC2L/

RASSF5/UBE2N/PEF1/CAV1/STUB1/RAB1A/HUWE1/SKP2/PIN1

/DVL2/PSMD10/PSMD11/PSMD1/PSMA7/RUVBL2/PSMB3/SDHAF2/PSMD4/PSMD3/RBX1/PSMD7/PSMD  
A-E

P1/PTBP2/SMN1/CRNKL1/SF1/SF3A1

/RNF187/PSMB10/PSMA5/PSMD13/PSMC4/FBXW9/ANAPC11/UBE2D1/PSMD10/PSMD11/PSMD1/PSMA1/SIRPA/F2RL1/TNFRSF11A/ZC3H12A/TNIP2/DVL3/PAK4/AXIN1/LYN/WNT7B/BIRC7/UNC5CL/ILLIMCH1/ZNF703/PIP5K1C/FLOT1/ACTG1/CAPZA1/DAPK3/ITGB1BP1/RAC1/CBFB/CNTNAP1/ITGA2

PL15/GCLM/ARID5B/KLF5  
PL15/GCLM/ARID5B/KLF5

2/MAPKBP1/WNT5A/C5AR2/ARRB1/CACTIN/SSC5D

DC/RGS14/HIF1A/NPM1/BRCA1/GNGT1/PCNA/XRCC2/BMF/DYNLRB1/COPS9/TICRR/SLC1A3/TNFRSHSPB1/QSOX1/ABCD1/IGF2BP1/ADORA1/ADAM9/MTMR2/NUP62/PFKFB3/EXOSC4/CDK4/MAD2L1/CTHRG

26A1/IRS1/HOGA1/ECHDC2/ECI2/ETFDH/ACOX1/ACAA1/IVD/ACAA2/ABHD1/IRS2/HSD17B4/GCDH

/KAT5/MSL3/ARRB1/OGT/KANSL2/BRD8/MSL1/KMT2A/BRCA2/KAT7/KANSL1  
/KMT5C/FTSJ3/HENMT1/BEND3/MTF2/TDRKH/ICMT/PRDM4/CXXC1/NTMT1/SUV39H2/PIWIL4/ZNF3

L1B/FGR/MAPK11/CASP1/PML/IL1R2/ANXA4/GSDMD/IL4R/TLR5/HK1/CARD16/CLEC5A/CARD18/B

/CTNNA1/OSR2/ADAMTS5/TWIST1/RHOA/PHEX/ADM/ANKRD11

2/POLR2I/POLR2J/POLR2D/DHX9/SEH1L/EIF6/POLR2E/PRKRA/SPOUT1/MIR155HG/METTL3/PPAR/RTN4RL2/ISL2/GDI1/MT3/DYNLT1/HDAC2/RAP1GAP2/YWHAH/JAG1/ITGB1BP1/FKBP4/MYLIP/IL

C5/FBXL7/FBXO6/FBXO44/SKP2/PSMB1/WWTR1/PSMB6/PSMA3/PSMB7/SKP1/FBXL18/FBXL2/PSMD

POX/CYP2A7/HP/PAH/NR1I2/DPYS/DAO/CYP1A2/HA01/SULT2A1/CYP2B6/HPD/CYP2E1/CYP2C8/P

PS18/GRK2/CCR5/AXL/CBL/CLEC5A/TRIM25

PS18/GRK2/CCR5/AXL/CBL/CLEC5A/TRIM25  
PS18/GRK2/CCR5/AXL/CBL/CLEC5A/TRIM25  
PS18/GRK2/CCR5/AXL/CBL/CLEC5A/TRIM25

7/DDIT4/GPI/NDC1/NUP188/UQC3/LDHA/PFKM/NUP85/NUP43/IMPDH2/PARP1/RAE1/NUP155/AL

R2J/POLR2D

R2/NUP62/PFKFB3/EXOSC4/CTSA/PKP3/EZR/IGF2BP3/HSF1/PSMB9/GIPC1/ATP6VOB/DDIT3/TPC  
T2/ARG1/SHMT1/RIDA/GLS2/SARDH/PRODH2/GPT/ALDH5A1/HAAO/HGD/SDS/ADHFE1/ACADSB/AAS

PHX2/INSIG1/ACOX2/ABCG5/APOA2/TM6SF2/LCAT/ANGPTL3/ABCB4/FABP4/APOA1/APOA5/CYP7A

SEMA3F/MEGF8/TRIM46/SEMA6B/SEMA4C/PTPRS/SHTN1/TTL/DPYSL2/WNT5A/OLFM1/WNT3A

4GALT3/B3GALNT1/ST3GAL4/SMPDL3B/ASAHI/CLN3/GBA/CLN6/FA2H/FUT3/PLA2G15/SMPD4/A4G

YN/GPRC5B/SOCS3/DVL2/IL15/LRP8/ARRB2/SEMA4D/ADRA2A/CSPG4/ACVR1/ABL1/ADAM17/TNK2

EG/TLR7/INPP5D/PTPRC/TLR8/IRF4/CD4/IFNG/RELA/CCR2/TLR1/LILRB1/CD80/TICAM1/UBE2J  
FTR/GABRB3

TAOK1/WNT5A/FGD2/ROR2/MAPK8IP3/ZEB2/DNAJA1/TLR6/FZD10/PTPN22/SAMD5/MAP4K5/EDN1/  
XL3/RPS6/NFKBID/IRF4/IFNG/ANXA1/TSC1/LILRB1/CD80/TP53/FGL2/NLRP3/TNFSF18/ZBTB7B

ATP6V0D1/ATP2A3/COX6B1/COX8A/HVCN1/SLC17A5/SLC15A4/TWIST1/STOML2/ACTN4/COX7B/AT  
/LAMA5/THY1/CORO1C/CDH6/F2RL1/CDH11/LIMCH1/ZNF703/NUMBL/PIP5K1C/FLOT1/ACTG1/CAP

AB7/RBM22/AAAS/PARK7/HYAL2/IFNG/PPP1R12A/SUPT6H/PIK3R2/NOLC1/PTPN14/NUP214/HDAC

1/CENPU/SCRIB/IFT57/PSPH/HSF1/SLC39A1/PRMT1/CFL1/MDFI/HNF1B/CCDC24/YBX3/TRIM28/  
HG2/VAV1/ARFGEF3/GPR35/ADGRG1/RASGEF1A/ARHGAP9/RHOF/F2RL1/ARHGEF19/RELN/ARHGAP3

/PARK7/DERL1/ACE/PPP2CA/USP33/TICAM1/MEN1/WNT5A/ARRB1/WNT3A  
N1/JAG1/MITF/RAC1/CALCA/BGN/IL15/ABR/VDR/TGFB3/TMEM119/AXL/ZNF675/IL20RA/SEMA3C

/TRIM71/HNRNPM/WNT4/PTBP1/THBS1/SULF2/HNRNPA1/POLR2I/POLR2J/POLR2D  
4/OVOL2/ACVR1/SFRP2/AKNA/FOXF2/NOTCH1/POFUT2/BCL9L/TWIST1/PDPN/RBPJ/VASN/STRAP/  
ATC4/USF1/RAD18/ERCC1/C9orf116/ACTR5/CCAR2/UBE4B/MSH6/ATR/ERCC3/SDF4/METTL3/DBB

GNMT

AT/ACSL6/HSD17B4/GCDH/ACAT1/TDO2/HSD17B8/DGAT2/ACSM3/ACSL5/PANK1/SULT1B1/ACSL1/  
AT/ACSL6/HSD17B4/GCDH/ACAT1/TDO2/HSD17B8/DGAT2/ACSM3/ACSL5/PANK1/SULT1B1/ACSL1/  
AT/ACSL6/HSD17B4/GCDH/ACAT1/TDO2/HSD17B8/DGAT2/ACSM3/ACSL5/PANK1/SULT1B1/ACSL1/

T/ITGB8/PSAP/PIGX/UGCG/HEXB



188/UQCC3/LDHA/PFKM/NUP85/NUP43/IMPDH2/PARP1/RAE1/NUP155/ALDOC/APP/NUP107/HK1/N

RN/CDKN2A/PLXNA3/NDRG3/PLCB1/DDR1/EXOSC4/CDK4/S100A8/TWF2/ADAM15/EZR/CDKN2D/TRP  
B4X/WNK2/HDAC7/MUC1/EZR/CDKN2D/ZNF385A/CREB3L1/DDIT3/GPD1L/TIMP2/YBX3/MIF/CD300

1

/HMGCS2/APOC3/ADH1A/ADH1C/CYP2E1/CYP2C8/CYP2C9/ADH1B/ADH4/CYP3A4  
3A4

XA8L1/VPS33B/TMEM127/DNAJC13/RAB7A/CHMP6/TSG101/CHMP4A/VTG1/ALS2CL/FASLG/CHMP2B

/NDC1/NUP188/UQCC3/LDHA/PFKM/NUP85/NUP43/IMPDH2/PARP1/RAE1/NUP155/ALDOC/APP/NUP  
/PTPN2/IL20RB/GLMN/TNFRSF14/IDO1/RUNX3/XCL1/DUSP22/LOXL3/NFKBID/CASP3/ANXA1/WNK  
F10/HAT1/MBD3/WDR5/PIH1D1/MORF4L2/MECP2/TWIST1/APBB1/DMP1/CRTC2/POLE3/BRPF1/CT

N/ANXA13/MICAL2/SAE1/TRIM6/TRIM28/NUTF2/PHPT1/MIF/MTCL1/CD2/HIF1A/MAPK3/OAZ1/P  
N/COL4A5/ITGAV/LAMB1/COLGALT1/ELF3/DDR1/SERPINH1/MPV17/ADAM15/BSG/COL16A1/COL3A

IL1B/CDK5/DNER/FA2H/CDKN2C/C5AR1/APP/GPR157/VIM/CSPG5/WDR1/EIF2B5/MAPT/RHEB/MED

/MTCH1/GHRHR/GDF11/TUSC2/CFTR/HOXA5/VEGFA/LGI4/MECP2

TGER4/TWSG1/TMEM98/NKAP/STOML2/RHOA/AP3B1/DOCK2/TNFRSF14/RUNX3/CCL19/XCL1/ATP7A  
SLX4/MDC1/SMCHD1/BRCC3/UBE2V2/NUDT16L1/RNF168/RIF1/KDM2A/PAXIP1/MLH1/ZBTB7A/POL

/CBL/TRIM71/HNRNPM/WNT4/PTBP1/THBS1/SULF2/HNRNPA1/POLR2I/POLR2J/POLR2D  
FOXF2/SGTA/PTK2/CSNK2A1/RPL5/PLK3/MAGEF1/MAP1A/CHFR/GLMN/CCAR2/EGF/CAV1/CSNK2A2

6/TCOF1/CENPU/SCRIB/IFT57/PSPH/HSF1/SLC39A1/PRMT1/CFL1/MDFI/HNF1B/CCDC24/YBX3/T

3/PSMC4/GSK3A/DVL2/IFT80/PSMD10/PSMD11/PSMD1/PSMA7/RUVBL2/PSMB3/SDHAF2/APCDD1/P  
NF1/ZC3H12A/LAG3/LYN/CBFB/IL2RA/PDGFA/CD300LF/PTPN6/SAMSN1/LST1/ABR/CST7/IL4R/G

188/UQCC3/LDHA/PFKM/NUP85/NUP43/IMPDH2/PARP1/RAE1/NUP155/ALDOC/APP/NUP107/HK1/N

-DRB1/B3GAT3/HRAS/RAB31/GAL3ST4/HLA-DQA1/HLA-DRA/SCAMP3/YKT6/IFNGR2/RNF24/BSG/H  
/MCM10/SMARCD3/POLD1/MCM7/PLCB1/PIF1/MCM3/RAD51AP1/RCC1/CENPO/EZH2/ALYREF/MUC1/  
/CPLX2/CD74/P2RX4/PRKCD/DRAM1/LAT2/VCAN/TRIP10/HLA-DRB1/VAT1/ABCD1/ACP5/LAMP5/S  
/CHEK1/RAN/HSF1/SMARCD1/HMGB2/TCF3/TRIM28/BRMS1/SIRT6/WDR76/RUVBL1/HIF1A/CBX1/C  
ENPF/RFC4/ORC1/CHAF1B/NUSAP1/P3H4/CENPH/TTK/SKA1/RAD51/RCC2/TONSL/AURKA/SPI1/CB  
TYMS/BOP1/DTL/FLNA/FEN1/CENPW/TAX1BP3/E2F5/MCM10/FANCD2/CCDC137/ARNTL2/SF3B4/DC  
/CPLX2/CD74/P2RX4/PRKCD/DRAM1/LAT2/VCAN/TRIP10/HLA-DRB1/VAT1/ABCD1/ACP5/LAMP5/S  
TP6VOD2/SYNGR1/DNAJC5/DDOST/ATP6V1C1/HLA-DPB1/CLTA/TMEM165/HSPA8/NEU1/HLA-DQB2/  
/CPLX2/CD74/P2RX4/PRKCD/DRAM1/LAT2/VCAN/TRIP10/HLA-DRB1/VAT1/ABCD1/ACP5/LAMP5/S  
C1L/NME1/CCDC28B/DCAF13/MCM3/NUP62/CCT5/SPAG5/MAPRE1/ASPM/RABL6/CKAP2L/IFT57/CH  
C119/HMMR/MARCKS/DTL/CEP131/TUBG1/CCDC88B/FAM110A/RELB/SPATC1L/NME1/CCDC28B/DCA  
P7D1/TUBG1/RACGAP1/SHCBP1/ARHGEF2/FAM110A/HSPB1/KIF11/NUP62/SPAG5/MAPRE1/MAD2L1  
PM4/ARHGEF2/HSPB1/ITGAV/VASP/ADAM9/CDC42EP1/TES/HCK/FHL3/MAPRE1/ZYX/GIT1/NECTIN  
D3NL/SCAMP3/NCF4/HLA-DQB1/FZD7/CD320/RAB11FIP5/TFRC/ATP6V0B/HLA-DPA1/HLA-DMB/DT  
/SNAP25/ZDHHC13/CD74/PTAFR/SCGN/NCK2/ITGAV/SCAMP5/IL15RA/HLA-DRB1/SLC6A9/BAIAP2  
P1/EZR/DCDC2/LSP1/CFL1/MICALL2/RHOQ/EPB41L2/FSCN1/WIPF3/CARMIL1/WASF2/GAS2L3/TP  
RMIL1/TCF3/NROB1/SNRPA1/STK17A/CSTF2/SGO2/SF3A2/SDCBP2/CD2BP2/DGKZ/RGS14/HIF1A/  
PA1/DTNBP1/AREG/SYNGR1/DNAJC5/TRAPPC4/ARFGEF3/BRSK1/HLA-DPB1/RAB15/CLTA/SYT8/HL  
CSK1N/FABP5/SERPINE2/TYROBP/CKAP4/PYGB/TGFB1/ITGAM/CTSV/CYBB/GSTP1/STX3/CD44/IT  
3/CD74/PTAFR/SCGN/ITGAV/SCAMP5/IL15RA/HLA-DRB1/SLC6A9/BAIAP2L2/LAMP5/RAB31/HLA-  
4/CENPH/TTK/SKA1/RAD51/RCC2/TONSL/AURKA/SPI1/CBX2/SPC24/NCAPD2/UHRF1/SKA3/FLNA/  
GPC4/PMEPA1/GPC3/AGTRAP/AGRN/SNAP25/SDC3/ZDHHC13/CD74/SOD3/CYTH4/QSOX1/VCAN/SCA  
LA-DQA1/MTMR2/ATP6V1F/GPC1/UNC13D/TUBB/LYZ/HLA-DRA/STARD3NL/CTSA/HLA-DQB1/TRPM2  
D3NL/SCAMP3/NCF4/HLA-DQB1/FZD7/CD320/RAB11FIP5/TFRC/ATP6V0B/HLA-DPA1/HLA-DMB/DT  
M7/PLCB1/PIF1/MCM3/RAD51AP1/RCC1/CENPO/EZH2/ALYREF/MUC1/EME1/ZNF385A/HMGB3/CREB  
D/FLNA/SNAP25/MAL2/P2RX4/PRKCD/TRIP10/LAMB1/ABCD1/IGF2BP1/NME1/MVP/HRAS/APLP1/M  
IB2/TPM4/ARHGEF2/HSPB1/ITGAV/VASP/ADAM9/CDC42EP1/TES/HCK/FHL3/MAPRE1/ZYX/GIT1/N  
74/CYTH4/QSOX1/SCAMP5/IL15RA/HLA-DRB1/B3GAT3/HRAS/RAB31/GAL3ST4/HLA-DQA1/HLA-DR  
TP6VOD2/SYNGR1/DNAJC5/DDOST/ATP6V1C1/HLA-DPB1/CLTA/TMEM165/HSPA8/NEU1/HLA-DQB2/  
ISP/FBLN1/HID1/POF1B/PDLIM7/NUSAP1/SKA1/FLNC/LMNB1/RCC2/ARHGAP4/AURKA/PSRC1/COR  
ISP/FBLN1/HID1/POF1B/PDLIM7/NUSAP1/SKA1/FLNC/LMNB1/RCC2/ARHGAP4/AURKA/PSRC1/COR  
NM1/PCSK1N/SYT13/FABP5/SERPINE2/TYROBP/CKAP4/PYGB/TGFB1/ITGAM/PPT1/CTSV/CYBB/GS  
ISP/FBLN1/HID1/POF1B/PDLIM7/NUSAP1/SKA1/FLNC/LMNB1/RCC2/ARHGAP4/AURKA/PSRC1/COR  
B1/RCC2/ARHGAP4/AURKA/PSRC1/CORO1A/CLIP2/KRT17/SKA3/FLNA/TTL4/RASSF3/TUBG1/TPM  
4/SF3A2/RUVBL1/CD2BP2/JMJD6/LSM4/HSPA8/EIF3B/RPL36A/MRPL17/MCRIP1/PES1/DKC1/NPM  
A4/ACTL6A/IRF1/COPS9/STAT1/HDAC1/DDX11/E2F4/PPARD/CBX3/DVL3/HDAC2/KDM1A/NASP/CH  
RACGAP1/ARHGEF2/KLC2/REEP4/TRIM54/TPGS2/KIF11/GTSE1/CCT5/SPAG5/MAPRE1/TUBB/RUSC  
2EP1/TES/HCK/FHL3/MAPRE1/ZYX/GIT1/CD151/EZR/BSG/RHOG/RPL8/CFL1/PLAU/EPB41L2/MRC  
TES/HCK/FHL3/MAPRE1/ZYX/GIT1/CD151/EZR/BSG/RHOG/RPL8/CFL1/PLAU/EPB41L2/MRC2/APB  
2EP1/TES/HCK/FHL3/MAPRE1/ZYX/GIT1/CD151/EZR/BSG/RHOG/RPL8/CFL1/PLAU/EPB41L2/MRC  
ST/CD300A/FLOT2/IQGAP1/STXBP2/ITGAX/TCIRG1/CD63/DOK3/FPR1/RAP2B/RHOF/SIRPA/DEGS  
TWF2/EZR/SCRIB/PLEK2/KIF18A/CFL1/FSCN1/CARMIL1/WASF2/APBB1IP/CXCR4/ITGA5/FLOT2/  
FEN1/CENPW/DSCC1/OIP5/POLD1/MCM7/PIF1/MCM3/SPAG5/CENPO/EZH2/MAD2L1/DNMT1/ALYREF  
A-DPA1/HLA-DMB/TPCN1/ATP6VOD2/SYNGR1/DNAJC5/DDOST/ATP6V1C1/HLA-DPB1/CLTA/RRAGD/  
19/RPLP0/RPL18/RPL23/RACK1/GADD45GIP1/MRPL10/RPL38/MRPL52/RPL23A/MCTS1/MRPL48/D  
KM/RPS21/TCP1/RPL7/RPL28/HOMER1/KXD1/PSMC4/CASP1/RPL39/RPL35A/EIF4A3/PSMD1/RPS3  
SPAG5/CENPO/MAD2L1/CENPU/CHEK1/HSF1/RANGAP1/HMGB2/SGO2/CENPE/UBE2I/PES1/BRCA1/N

/CORO1B/DYNLT1/FLOT1/MYO1G/PSTPIP1/ITGB1BP1/RAC1/BCAR1/CDK5/CTTN/PLXND1/FAM89B/MT1/CENPU/HSF1/KIF18A/RANGAP1/CENPL/SGO2/CBX1/CENPE/PPP2R1A/SGO1/DYNLL1/SPDL1/KPRPF3/SNU13/TTF2/PRPF6/DDX41/SF3A3/CWC27/SNRPG/RBM17/HNRNPM/HNRNPA3/PRPF31/ZMATRPL10/RPL38/MRPL52/RPL23A/MCTS1/MRPL48/DAP3/MRPS7/MRPL53/MPV17L2/RPS7/RPL7A/RPS/SIRPA/HK3/CD58/HSP90AB1/DYNLL1/ILF2/AMPD3/NBEAL2/GPI/PPIA/ACLY/DYNLT1/NCKAP1L/NDA/PTGES2/GYG1/CCT2/DYNC1H1/FMOD/NPC2/PLBD2/PA2G4/ACLY/CAP1/ASAHI/RNASE2/GBA/C/KNTC1/BEX4/DDX11/CEP85/CEP89/GPSM2/HAUS1/AUNIP/KNSTRN/RASSF1/POC1A/HAUS8/DYNC1PIP5K1C/HIP1R/SLC9A3R1/FERMT1/ITGB1BP1/RAC1/PDE9A/BCAR1/CTTN/FGR/MYADM/VIL1/SAMQGAP1/CENPE/CHMP4C/LZTS2/DDX11/GDI1/INCENP/PITPNM1/AGBL5/BCL3/KIF14/RAB11FIP4/A8/PRSS3/DYNLL1/ILF2/NBEAL2/OLR1/NCKAP1L/ADAM8/ASAHI/SLC11A1/RAC1/CTSS/LAMTOR1/PC2/PA2G4/ACLY/CD68/CPNE1/CAP1/RNASE2/ANXA11/LAMTOR1/GNS/FTL/NFAM1/GALNS/DSN1/A/N2/KIFC3/KIF15/HAUS8/DYNC1LI1/MAP4/KIF2A/LRP8/DNAL4/ACTL8/KATNB1/HAUS6/NDE1/TCTPC2/PA2G4/ACLY/CD68/CPNE1/CAP1/RNASE2/ANXA11/LAMTOR1/GNS/FTL/NFAM1/GALNS/DSN1/A/THOC6/MSH2/CBX5/XRCC6/TELO2/NABP1/RPA2/EID3/PTGES3/NAT10/DNA2/DOT1L/RAD51D/WRAPB/ATP6VOE1/CALR/CDC42EP2/OCRL/STX4/VIM/ATP6VOD1/HVCN1/VAMP8/GNLY/SGAP2/DNM2/DMSPD1/KNTC1/ERCC6L/NUP37/INCENP/ITGB3BP/DCTN2/KNSTRN/DCTN5/CENPI/NUP85/PPP1CC/CH1/KPNB1/CTSS/GNS/PSMA5/PSMD13/COMMD9/IMPDH2/PSMD11/GSDMD/ALDOC/PNP/XRCC6/PSMD3/MRPL18/RPL6/RPL37/RPL27A/RPL36/UBA52/RPL19/MRPL37/RPL22L1/NSUN4/RPL13A/MRPL27/SPDL1/KNTC1/ERCC6L/NUP37/INCENP/CBX3/ITGB3BP/KNSTRN/DCTN5/NUP85/PPP1CC/CENPK/N/C1/CTTN/WAS/SPECC1/KPTN/SMTN/VPS18/MYO9B/MYO5A/WDR1/INCENP/ITGB3BP/KNSTRN/DCTN5/NUP85/PPP1CC/CENPK/NUP43/DYNC1LI1/DSN1/ZNF207/NUP1RPA2/NAT10/DNA2/RAD51D/DCLRE1B/GAR1/HAT1/NBN/ERCC1/THOC2/RPA1/ATR/TP53BP1/THOC1OPG1/TMEM199/PDCD6/RASSF9/SEC13/COPG2/SPPL3/CFTR/SREBF1/HLA-F/COPB2/CLTC/AP1S1/NXA11/YWHAB/CTSD/MYO5A/PDIA6/RAB5C/ERP29/HSP90AA1/HSPA5/CANX/RAB29/PPIB/CLTC/RANXA11/YWHAB/CTSD/MYO5A/PDIA6/RAB5C/ERP29/HSP90AA1/HSPA5/CANX/RAB29/PPIB/CLTC/RARPL5/RPS27A/RPS12/RPS4X/RPL6/RPL37/RPL27A/RPL36/UBA52/RPL19/RPS11/RPL22L1/RPL13BL5/GPSM2/KNSTRN/CTTN/MAP4/RAE1/RPS3/CDC42/KAT2A/IKBKG/TBL1XR1/IQCB1/KDF1/CCSAP90AA1/MAN2B1/HEXB/BCAN/ACAN/LGMN/TPP1/MANBA/GPC2/HEXA/SPA2/RAD1/NOL6/SYCE1L/ADD3/NCAPD3/TEX11/F19/SART1/PHF5A/PRPF38A/HTATSF1/LSM8/PPIE/SF3B3/DHX15/LUC7L/SF3B2/MFAP1/PRPF4/CPPC1/CCT8/S100A7/GCA/VCP/MAN2B1/CYB5R3/HEXB/RBMX/HNRNPA1/PPIE/SF3B3/HNRNPR/SF3B2/DHX38/SRSF1/DHX8/RBM8A/SF3B6/MAGOHB/SNRPD3/SF1/LSM8/SART3/TGS1/USP39/LUC7L/SF3B2/STRAP/LSM1/PRPF4/ARFGEF1/GEMIN2/SNRNP70/S33/CD177/ATP6AP2/SLC2A3/TSPAN14/8/SART3/TGS1/USP39/LUC7L/SF3B2/PRPF4/ARFGEF1/SNRNP70/SF3B6/SNRPD3/FAM207A/BMS1/NOL10/RSL1D1/EBNA1BP2/EIF6/UTP23/WDR46/IMP4/NIP7/RPF1/RIOK1/WDR12RCA5/DMAPI/RPA1/SMARCAL1/TP53BP1/MMS22L/0/SURF6/RPL29/RPL13/RPL4/RPL41/RPL9/RPL24/RPL11/RPL10/RPL14/RPL10A/ZNF622/RPL123/USP39/LUC7L/SF3B2/PRPF4/SNRNP70/SF3B6/SNRPD3

4/MAGOHB/SNRPD3/IK/SNRNP200/BUD13  
4/MAGOHB/SNRPD3/PRPF38B/IK/SNRNP200/BUD13

BG1/PLIN3/CD74/KCNJ11/PKN1/STEAP1/SCAMP5/IL15RA/HLA-DRB1/PLEKHB2/TSPAN15/LAMP5/NRPD1/POLA2/CACYBP/DDOST/NAA10/RUVBL1/MAD2L2/MRGBP/UBE2I/RNF19B/SHARPIN/TAF6/PHNXA11/LAMTOR1/CD47/PTPN6/AGPAT2/SLC44A2/TMEM63A/GSDMD/STK10/GPR84/CNN2/LAIR1/CT8/CD33/CD177/TMBIM1/SLC15A4/SLC2A3/TSPAN14/MLC/ADGRG3/ITGAL/ATP11A/PLD1/SLC04CA/NCAPD3/SUV39H1/HMGA2/MORC2

O2/RAD21/VIM/CXXC1/OGG1/HNRNPM/MAPT/PHF5A/GHRHR/SRPK1/HAT1/HNRNPU/PIAS4/CSNK2B/

ALNT3/CLIP3/NSF/B4GALNT4/FUT1/NSFL1C/LPCAT2/ARAP1/NECAB3/FUT8/PLK3/B4GALT4/YIPFP3/SLC29A3/VPS28/MVB12A/STARD3/VPS18/WDR91/VAMP8/LTV1/FIG4/MCOLN3/VAC14/YIPF2/M P1/RPL41/RPS6/RPL24/UNK/RPL11/AGO1/RPL10A/FXR1/EIF4G1/RPS28/PNPT1/ATXN2/RPL31/NAPBP/TAP2/RAB9A/ATP7A/RAB8B/HLA-C/VAMP3/RAB22A/ATP6V0A1/HLA-E/RAB7A/APPL2/TLR1/

UB1/E2F4/PPARD/LEF1/NONO/SIX2/ATF4/CDK2/SNF8/HCLS1/KDM1A/MED8/CBFB/MTA2/DEAF1/T SN/PDE4A/PROM1/RAB25/LCP1/PAK1/GNA12/GNGT1/THY1/COR01C/SLC39A6/HSP90AB1/ARPC2/G

SPAG4/RAN/OSBPL3/TMEM201/RANGAP1/RRP12/CHMP4B/EIF5A2/CACYBP/BAX/NUTF2/NRM/ALOX5 /PDPN/FAP/EP8SL1/EPHA2/KSR1/CIB1/C2CD5/MYO1C/ABCA7/TMEM4/ADGRE2

A-DQA2/FZD2/HLA-DRB5/NECAP2/CLTB/AP2M1/NCALD/DVL2/GAD1/AP2S1/VPS18/SYT1/OCRL/AP

LA-DRB5/COPZ1/NECAP2/CLTB/AP2M1/NCALD/GAD1/AP2S1/HLA-B/SYT1/AP1G2/AP1B1/M6PR/CO SYT1/AP1G2/AP1B1/M6PR/RASSF9/CEMIP/VAMP8/DBNL/CFTR/RAB3A/MYO6/AP2A2/AP3B1/CLTC/

STX10/RAB35/VMA21/PAM/HLA-DQA2/SV2A/SYNGR3/HLA-DRB5/MCTP1/TMEM163/WFS1/CLTB/NCA

S3/AP1S2/AP2B1/COPB1/AP2A1/VPS33A/COPA/KLHL12/PEF1/AP5B1/AP4B1/IGF2R/AP5S1/ARCN  
S3/AP1S2/AP2B1/COPB1/AP2A1/VPS33A/COPA/KLHL12/PEF1/AP5B1/AP4B1/IGF2R/AP5S1/ARCN

P3K14/SIRT7/FBXW9/DSN1/SMARCB1/RAE1/SNU13/POLR2L/POLR2K/IP6K1/RRP7BP/UTP4/INO80

LAMC2/FCHSD1/RHOF/TNFAIP2/CORO1C/GPSM1/DYNC1H1/TIGD5/WIPF1/HIP1R/LASP1/GPSM2/FL  
LTB/NCALD/HLA-B/APP/OCRL/AP1G2/CSPG5/COPG1/TMEM199/PDCD6/RASSF9/SEC13/COPG2/SPP  
L1/GMFG/WDR1/NF2/ACTR3/DBNL/CAPN2/WIPF2/DSTN/PLEKHH2/ACTN4/SPTAN1/GMFB/MAEA  
2F1/TAF3/ERCC3/ZNF768/TADA3/PAF1/RRAP/RPRD1A/TCEA1/GTF2A2/POLR3F/POLR2B/POLR1C  
2/ARFRP1/RGP1/GOLPH3L/CLTC/AP1S1/AP1S3/AP1S2/COG4/COG2/RAB9A/ARL1/AP4B1/IGF2R/V

/MATK/TRAF3/GNB1L/KCNAB2/GNG4/GNGT2/STAC/PALM  
2F1/TAF3/ERCC3/ZNF768/TADA3/PAF1/RRAP/RPRD1A/TCEA1/GTF2A2/POLR3F/POLR2B/POLR1C

/HELB/XRCC5/ACTR2/TP53/SETMAR  
/UNC93B1/STXBP2/HLA-DQB2/TCIRG1/HLA-A/ITGB5/STX6/RAB7B/CTLA4/HYOU1/RAB35/HIP1R/  
A/FGR/PLXND1/PIEZO1/ARF4/RPS3/SPRY4/EPB41L3/MAPT/CSPG4/NF2/SGCE/PALM/WWC1/DNM2/  
NPU/PIAS4/CSNK2B/DGKQ/DCAF7/MAEA/MORC2/THOC1/ARFGEF1/CASK/ENC1/GMCL1/SPARC/HNRN  
2F1/TAF3/ERCC3/ZNF768/TADA3/PAF1/RRAP/RPRD1A/TCEA1/GTF2A2/POLR3F/POLR2B/POLR1C

AM/HLA-DQA2/CLN3/HLA-DRB5/RAC1/GBA/CLTB/RAB10/SMPD4/CHST2/LLGL1/PLEKHJ1/APP/SLC

1A1/RAB20/HLA-DRB5/WNT7B/CACNG4/AP2M1/RAB10/AP2S1/ATP6VOC/HLA-B/ATP6V0E1/CALR/O

HLA-F/RAB11A/ABHD17A/PDIA3/RAB13/SLC9A6/RAB8B/HLA-C/VAMP3/HLA-E/SORCS2/GRIPAP1/

9/CTLA4/SORT1/RAB35/VMA21/HIP1R/BCAP31/HLA-DQA2/FZD2/KDEL1/HLA-DRB5/COPZ1/NECA  
6A9/IGF2BP1/ADORA1/PRNP/LAMP5/ITPKA/C1QL1/PLCB1/ABHD17C/MTMR2/NRGN/DAGLA/RUSC1/  
Z/NME2/F13A1/CTSA/QPCT/ISLR/TUBB4B/GRN/CHIT1/PSMD14/TIMP2/HSPA6/ALOX5/MIF/CANT1

35/SEN3/WTAP/RNF2/WDR5/TRIM37/RNMT/RBM15B/PELP1/PAGR1/METTL3/TEX10/SNRPD3/RIOK

4/UNC45A/NONO/SMC4/U2AF2/SRSF9/ATXN2L/EHMT2/SNRNP40/AKAP8L/RBM19/PIAS3/CBX4/FIB  
/IQGAP1/EFHD2/SLC9A1/EFNA5/CD2/MAPK3/EFNB1/SMPD2/ADGRG1/SPRED1/RAP2B/THY1/COR01

/IQGAP1/EFHD2/SLC9A1/EFNA5/CD2/MAPK3/EFNB1/SMPD2/ADGRG1/SPRED1/RAP2B/THY1/COR01

/MCTP1/TMEM163/VDAC1/WFS1/CLTB/RAB10/KCNK9/SYT12/ICA1/SYT1/APP/DNM1L/SYT3/STX4/  
BD10/SNRPB2/PAFAH1B2/HEATR1/TIMM13/AKNA/GAR1/SP140/UBTF/NUAK1/SMARCA5/RNMT/ZNF4

1/WFS1/CLTB/RAB10/KCNK9/SYT12/ICA1/SYT1/APP/DNM1L/STX4/RABAC1/ATP6VOD1/RAB3D/MF  
/FLOT2/IQGAP1/EFHD2/SLC9A1/EFNA5/CD2/MAPK3/EFNB1/SMPD2/ADGRG1/SPRED1/RAP2B/THY1  
PC/PHLDB1/HCLS1/ACTB/CTTN/MYADM/WAS/CLTB/RAB10/NSMF/RIMS3/LLGL1/PPFIA3/ACTL8/GM  
/RASA3/STAC3/MATK/TRAF3/RPL27/GNB1L/RASAL3/KCNAB2/EEF1A2/GNG4/GNGT2/STAC/PALM/S

8/B4GALT4/YIPF2/GOLPH3L/TMEM115/TMEM87A/FUT11/BET1L/YIPF1/B3GALT6/GCNT1  
P1/KIF21B/DTNBP1/FSCN1/TIMP2/MAP2/BRSK1/IQGAP1/HIF1A/HSPA8/NRCAM/THY1/BASP1/BIN

EM87A/FUT11

2/MED25/GTF3C1/E2F6/NFYC/POU2AF1/TAF12/TAF10/RARG/NFATC4/GTF3C5/HNRNPU/THRA/ERC  
33/MRPS5/MRPL36/MRPL14/MRPL3/MRPL20/MRPL24/MRPS16/MRPL55/CHCHD1/MRPS2/MRPL21/ND  
33/MRPS5/MRPL36/MRPL14/MRPL3/MRPL20/MRPL24/MRPS16/MRPL55/CHCHD1/MRPS2/MRPL21/ND

8/LYZ/NME2/F13A1/CTSA/QPCT/ISLR/TUBB4B/GRN/CHIT1/PSMD14/TIMP2/HSPA6/ALOX5/MIF/C  
/CFL1/RANGAP1/RHOQ/GIPC1/EPB41L2/DTNBP1/WIPF3/TRAF2/RHOC/MAP2/FLOT2/ABHD12/CLTA  
Y1/BASP1/PALLD/HSP90AB1/CAD/ARPC3/DYNLT1/CYTH2/ACTG1/SRI/DCTN2/FKBP4/ITGA2/ACTB

PC11/UBE2D1/DCAF16/UBE2E1/FBXL6/BARD1/UBE2A/ASB1/KCTD2/CBX8/DCUN1D5/PCGF2/RBX1/

/SCP2/PHYH/FABP1/CAT/ACSL1/EPHX2/ACOX2/BAAT/SLC27A2/PIPOX/EHHADH/DAO/HAO2/HAO1/  
/SCP2/PHYH/FABP1/CAT/ACSL1/EPHX2/ACOX2/BAAT/SLC27A2/PIPOX/EHHADH/DAO/HAO2/HAO1/  
C3/NFYA/ATF6B/IRF4/MAX/TERF1/KCNIP3/HELB/XRCC5/GTF2E1/SUZ12/POLD2/SP1/WDR18/PUR

8/LYZ/NME2/F13A1/CTSA/QPCT/ISLR/TUBB4B/GRN/CHIT1/PSMD14/TIMP2/HSPA6/ALOX5/MIF/C  
TN/PLEKHH2/SPTAN1/GMFB/MAEA/LLGL2/PPP1R9A/UTRN

B/C4BPA/CFHR3/PON1/HPR/KNG1/A1BG/APOA1/HPX/PLG/AHSG/AFM/HRG/SERPINC1

Y01C/AAAS/IP07/NUP214/BICD2/DDX19A/TPR/MCM3AP/NUP50/SNUPN/IP05/NUP133

RPS24/RPS3A/MRPS16/MRPS2/RPS18/RPS28/RPS17/RPS15A/MRPS26/MRPS11/MRPL42/MRPS27/M  
CCND2/POLE4/POLA1/POLR2L/KAT2A/PRIM2/POLR2K/IKBKG/LAS1L/POLD3/POLR3D/IGF1R/POLR

K1/CCNJ/SESN2/ERCC2

P4/CDK5/CTTN/STMN3/INPP5J/APP/GDPD5/KATNB1/CBL/MYO5A/CCDC120/MAPT/ARPC5/STMN2/D

NTPD4/TEX261/RER1/UBIAD1/CSGALNACT1

5/NDUFB9/MRPL48/DAP3/MRPS7/DNA2/MRPL53/MPV17L2/TIMM13/APOO/MRPS17/MRPS21/MRPS15

27/HGS/NPC1/RAB7B/CD68/LAMP3/KCNQ1/SNF8/CLN3/SLC11A1/HLA-DRB5/LAMTOR5/CTSS/LAMT  
RHGEF2/P2RX4/SERPINI1/CBX6/IGF2BP1/ADORA1/PRNP/LAMP5/ITPKA/ABHD17C/NPTX2/MTMR2/  
2  
IL2/ESYT1/GNAS/HIP1/GNAI2/DTNA/MYZAP

5/CTTN/STMN3/INPP5J/APP/GDPD5/KATNB1/CBL/MYO5A/CCDC120/MAPT/ARPC5/STMN2/HSP90AA

/SHARPIN/NRCAM/STX1A/GABRA3/PPP1R9B/HIP1R/ARFGAP1/MT3/PRR7/LRFN1/LYN/CDK5/SPOCK



NIK/HLA-B/DENND6B/PLEKHJ1/APP/SLC9A7/MY05A/CLIP3/RASSF9/ABCG1/RAB4B/STX7/VAMP8/

3

MARCD1/TRIM28/SIRT6/FAAP24/GMNN/NUPR1/PYG02/CBX1/NPM1/RBL1/PCNA/MLLT3/CHAF1A/SIRT6/GMNN/NFKB2/RUVBL1/MED22/JMJD6/NUPR1/CITED4/BCL9/PPP1R13L/RFXANK/NPM1/RBBP8/TK39/HCK/DDR1/WNK2/CDK4/NME2/CSF1R/CDC7/GUCY2C/CHEK1/RPS6KA1/LIMK2/JAK3/GRK6/TRUP62/TUBB/ASPH/LAD1/MAPK8IP2/DLG3/MARVELD1/COL16A1/COL3A1/LAMC1/SPAG4/TUBB4B/RPCCA2A/CTSA/ADAP2/NCF4/TBC1D16/NCF1/RANGAP1/IGFBP3/PSMD14/SAE1/RABEP2/CCL5/BEX3/IA1/MISP/POF1B/PDLIM7/NUSAP1/SKA1/FLNC/ENAH/IQGAP3/RCC2/GAPDH/PSRC1/CORO1A/CLIP21/CDK16/HK2/PFKFB4/PKN1/PRKCD/EFNA4/NME1/ITPKA/SYK/STK39/PFKFB3/HCK/DDR1/WNK2/CHOV/ARL4C/RAD54L/TNNT1/MCM6/DDX39A/TUBG1/DSCC1/TOR4A/GINS2/KLC2/RGS19/MCM7/RAB4HOV/ARL4C/RAD54L/TNNT1/MCM6/DDX39A/TUBG1/DSCC1/TOR4A/GINS2/KLC2/RGS19/MCM7/RAB4HOV/ARL4C/RAD54L/TNNT1/MCM6/DDX39A/TUBG1/DSCC1/TOR4A/GINS2/KLC2/RGS19/MCM7/RAB4HOV/ARL4C/RAD54L/TNNT1/MCM6/DDX39A/TUBG1/DSCC1/TOR4A/GINS2/KLC2/RGS19/MCM7/RAB4AURKA/GSTP1/MARCKS/CDC25C/SQSTM1/YWHAZ/FLNA/ITGB2/CDKN2A/RACGAP1/PKN1/PTAFR/PRKSQSTM1/YWHAZ/ITGB2/CDKN2A/RACGAP1/PKN1/PTAFR/PRKCD/HSPB1/RELB/ITGAV/IL15RA/PLEKNUP62/TUBB/PAG1/DLG3/ADAM15/EZR/CASP4/SH2D2A/FZD7/SLC26A6/CHEK1/DNAJC6/NCF1/CCTCNE1/CCNA2/PCSK1N/SERPINE2/TRIB3/DEPDC1B/FBLN1/ECT2/ARL2/CCNF/TGFB1/ARHGAP4/PARC2/ITGAV/LAMB1/VASP/ADAM9/SYK/CDC42EP1/TES/MAPRE1/TAGLN2/LAD1/TWF2/FMNL2/ASAP1/D16/MICALL2/RANGAP1/ARHGEF39/YBX3/PLEKHG2/TRAPPC4/VAV1/NUTF2/ARFGEF3/IQGAP1/CLTKIF18A/CFL1/MICALL2/GIPC1/EPB41L2/FSCN1/WIPF3/WASF2/CXCR4/GAS2L3/TPM2/MSN/PPP1RPK2/STK17A/BRSK1/PRKDC/MAPK3/MAST2/MAP2K2/PAK1/PRKX/DYRK2/CSNK1E/MARK2/RPS6KA4/F18A/MCM5/KIF21B/ATP6VOB/ABCC4/ATP6VOD2/HSPA6/ATP6V1C1/ABCC5/OLA1/RUVBL1/CHTF18/RANGAP1/ARHGEF39/YBX3/PLEKHG2/TRAPPC4/VAV1/NUTF2/IQGAP1/MICALL1/ATP6AP1/PAK1/A/RANGAP1/ARHGEF39/YBX3/PLEKHG2/TRAPPC4/VAV1/NUTF2/IQGAP1/MICALL1/ATP6AP1/PAK1/A

EF19/TBC1D1/RIN1/ARHGAP39/GDI1/ARFGAP1/HSPBP1/TBC1D10B/GPSM2/NCKAP1L/ARHGAP1/RTF11/CCT5/SPAG5/MAPRE1/MX2/S100A8/EZR/KIF12/RAB11FIP5/KIF3C/KIF18A/KIF21B/CACYBP/BSG/NOP56/SCRIB/CTNND2/RAN/RANGAP1/GIPC1/FSCN1/ATIC/CHMP4B/WASF2/BZW2/PRDX1/IQD/GBP2/RGS14/RAB25/RIT1/RRAGC/GNA12/RAP2B/GNGT1/TUBB6/RHOF/EFTUD2/TUBA1A/TUBB2A/EDA/NOL3/PDCL3/STAT1/CCL13/BID/CNIH4/CCL2/SHC1/CXCL9/CXCL3/CXCL13/DEFB1/CCL28/IN1/ARHGAP39/GDI1/ARFGAP1/TBC1D10B/GPSM2/NCKAP1L/ARHGAP1/RTKN/RAP1GAP2/SIPA1L2/ARFGAP1/TBC1D10B/NCKAP1L/ARHGAP1/RAP1GAP2/SIPA1L2/ARHGDIB/TBC1D30/TBC1D13/RASAXCL13/CCL28/IL1B/TNFSF13B/CCL4/TGFB2/CXCL16/IL15/TNFSF12/PF4V1/TGFB3/CXCL11/XCLF12/KIF3C/KIF18A/KIF21B/FAM83D/GAS2L3/MAP2/MTCL1/RGS14/MAP1S/MAST2/CENPE/KLC3/C3/ERCC6L/RFC2/DDX11/BLM/CHRA1/LIG1/DNMT3A/ISG20/CHD4/RUVBL2/POLE4/RPS3/POLA1/PF1/CORO1B/ABLIM2/HIP1R/LASP1/FERMT1/CAPZA1/HCLS1/PSTPIP1/ARPC5L/CTTN/CORO2A/WA3/ARHGDIB/PKN3/KCTD10/WAS/DVL2/PFN1/WASF1/ABR/CDC42SE1/FGD6/PARD6B/INF2/CDC42SE/GPRC5B/CDKN1C/SOCS3/PPP1R1B/GCN1/CDKN2C/CCND2/MTCP1/GMFG/RACK1/DBF4B/PKIA/CALMS3/PFKM/PHB/LCK/BANF1/PPP1CC/CDK7/MSH2/YWHAQ/YWHAB/NCL/AGO2/TOPBP1/SYT1/XRCC6/S/D9/CBX5/MTF2/ZMYND8/CBX8/TBL1XR1/VRK1/DPF2/WRAP53/HAT1/ANP32E/UIMC1/WDR5/PIH1D10/RPL38/MRPL52/RPL23A/DAP3/MRPS7/RPS7/RPL7A/RPS23/RPS10/MRPS17/MRPS21/RPS15/RPS3C/LONP1/SSBP1/HSPD1/RAD51D/MYEF2/HNRNPU/RAD18/ERCC1/TSN/HNRNPA1/POLR2D/DHX9/RP15A/RACK1/IGBP1/RPA2/MAPT/ANKLE2/VCP/KCNN4/CSK/BAD/CD33/BOD1/PTK2/STYXL1/PTPN1/B12A/GPX1/ABI3/GRB2/AFAP1/SH3GL1/CBL/ABI2/RAD9A/MAPT/KHDRBS1/CCDC6/ABL1/RUFY1/P6/GRPEL2/DNAJB11/HSPE1/CCT8/HSPD1/PTGES3/HSPA2/HSP90AA1/PFDN6/HSPA5/TTC1/CANX/HB1BP1/ITGA2/IL1B/CDH17/ADAM23/IBSP/CALR/ITGB8/EMILIN1/SFRP2/VCAM1/PTPN2/THBS1/A6/ERCC3

K2/IRAK1/CDK16/HK2/PFKFB4/PKN1/PRKCD/POLD1/EFNA4/NME1/ITPKA/SYK/STK39/PFKFB3/HC3/MRPL13/CPSF6/EIF4A3/ILF3/XPO5/RPS3/SAMD4B/HNRNPAB/NCL/AGO2/CALR/RPL35/RBPMS/PME1/KCNQ1/ANAPC7/STRN4/LCK/PPP1CC/CTTNBP2NL/CADM4/TRAF3/GRB2/PTPA/KAT2A/CHCHD38/DDX41/HELLS/XRCC6/POLQ/DDX54/DNA2/DDX23/CHD1L/DQX1/NBN/RAD18/DDX56/DHX57/ACTR598/PRPF31/SNRPB2/EIF3K/HNRNPU/NVL/CSNK2B/HSPA5/PHF6/ETF1/EIF5A/PRMT3/RPLP1/DHX

CDKN2B/GPRC5B/CDKN1C/SOCS3/PPP1R1B/GCN1/CDKN2C/CCND2/MTCP1/GMFG/WDR91/RACK1/DBF1/WIP1/ARHGAP17/RALBP1/NCKAP1/NOX1/SRGAP1/EPH3/DOCK7/MAP3K11/VAV3

FB4/PKN1/PRKCD/EFNA4/ITPKA/SYK/STK39/PFKFB3/HCK/DDR1/WNK2/CDK4/NME2/CSF1R/CDC7/  
TPI1/STAT1/NPLOC4/GPI/PA2G4/SLC22A18/BID/HSPBP1/UBE2J2/OTUB1/ACTG1/PRR7/AXIN1/L  
CFC1/FKBP4/CNTNAP1/LAMTOR5/JCHAIN/LAMTOR1/WWC3/HOMER1/AP2M1/SLA/EVPL/DVL2/AP2S1

4/GPI/PA2G4/SLC22A18/BID/HSPBP1/UBE2J2/OTUB1/ACTG1/AXIN1/LYN/WFS1/UBE2L3/TCP1/P

UPT6H/SUPT16H/HMGN3/L3MBTL1/ACTR6/EZH1

MY09B/CCDC102A/MY05A

OLA1/RRAGD/GBP2/RAB25/RIT1/RRAGC/GNA12/RAP2B/TUBB6/RHOF/EFTUD2/TUBA1A/TUBB2A/RA  
OLA1/RRAGD/GBP2/RAB25/RIT1/RRAGC/GNA12/RAP2B/TUBB6/RHOF/EFTUD2/TUBA1A/TUBB2A/RA  
2/VIL1/WDR45B/PFN1/SNX27/GSDMD/SYT1/BTK/ARFIP2/PLEKHN1/MAPT/OBSCN/SNX11/ARAP1/S

F1BP1/HSP90AA1/HDAC10/USF1

GBP2/RAB25/RIT1/RRAGC/GNA12/RAP2B/TUBB6/RHOF/EFTUD2/TUBA1A/TUBB2A/RAB3B/RASEF/H  
GBP2/RAB25/RIT1/RRAGC/GNA12/RAP2B/TUBB6/RHOF/EFTUD2/TUBA1A/TUBB2A/RAB3B/RASEF/H

RAD23A/APEX1  
B35/PITPNM1/HIP1R/SNX10/PLEKHA4/MYO1G/KCNQ1/TULP3/PLEKHA2/VIL1/WDR45B/PFN1/SNX2

RAB25/RIT1/RRAGC/GNA12/RAP2B/TUBB6/RHOF/EFTUD2/TUBA1A/TUBB2A/RAB3B/RASEF/HSP90A  
/AP2S1/GRB2/VPS18/CBX5/COL8A2/SKAP2/ACTL8/ABI2/MAPT/PDCD6/KHDRBS1/CHN1/COL11A1/

DD3/CD2AP/TUBB3/TLN1

MARK4/GGA3/UBR5/DAXX/RNF8/FAF1/UBE2N/AUP1

1/LUM/COL4A2/LAMB3/MATN3/COL8A2/ECM1/EMILIN1/COL11A1/THBS2/LAMA4/COL9A3/EFEMP2/  
O3

/TNFRSF11B/CD320/GRN/LTB/HMGB2/AREG/RABEP2/CCL5/SEMA4A/CCL26/TNFSF9/MIF/ZP3/EFN

RIMS3/RUNDC1/LLGL1/DNM1L/TRAPPC3/MY05A/TBC1D10C/PIFO/BICDL2/NSF/TBC1D22A/DENND3

GBP2/RAB25/RIT1/RRAGC/GNA12/RAP2B/TUBB6/RHOF/EFTUD2/TUBA1A/TUBB2A/RAB3B/RASEF/H  
GBP2/RAB25/RIT1/RRAGC/GNA12/RAP2B/TUBB6/RHOF/EFTUD2/TUBA1A/TUBB2A/RAB3B/RASEF/H  
/AUP1

NK2

/PAH/FMO3/CYP1A2/AKR1D1/CYP4F2/CYP7A1/CYP2B6/CYP4A11/CYP2E1/CYP2C8/CYP2C9/CYP8B

PITRM1/ADAMTS2

PT4H1/PABPC1L/TLR8/SRA1/STRBP/HNRNPC/AGO1/FXR1/ANXA1/SYCRIP/RBMS2/PNPT1/DDX1/T  
ATS2/HMGB2/TRIM6/TCF3/BRMS1/NROB1/GMNN/PRKDC/RUVBL1/MAD2L2/HIF1A/TRIM11/UBE2I/P

/HTATIP2/KDM1A/HCFC1/CBFB/BUD31/MTA2/UBE2L3/TAF9/PQBP1/PML/SMARCB1/ZMIZ2/VDR/CD  
P7/DTD1/RNASE2/EMG1/TRMT1/PRIM1/TRMT61A/RBMX2/POP1/TRMT112/PTRH2/TRMT6/EDC3/ISY

BP4/APOA1/APOA5/CFHR4/SLC27A5/SLC10A1

GXT/GNMT/AFM/TAT/ADH4  
3A5/CYP2A7/CYP1A2/CYP4F2/CYP7A1/CYP2B6/CYP4A11/HRG/CYP2E1/CYP2C8/CYP2C9/CYP8B1/

L3/CNIH4/KISS1/CCL2/CXCL9/CXCL3/CXCL13/DEFB1/WNT7B/CCL28/REEP2/GPRC5B/TULP3/ADR  
AP1/BATF3/RUVBL2/SAP30/ZMYND8/HSBP1/NCOR2/DDX54/TBL1XR1/DR1/E2F6/DPF2/MYBBP1A/W  
1/OR2A14/OR3A1/OR10H3/OR51D1/OR52B2/OR7C2/OR10H4/OR4D5/OR13D1/OR52K2/OR52A1/OR6

CD320/GRN/LTB/HMGB2/AREG/RABEP2/CCL5/SEMA4A/CCL26/TNFSF9/MIF/ZP3/EFNA5/IL34/EBI

3A5/CYP2A7/CYP1A2/CYP4F2/CYP7A1/CYP2B6/CYP4A11/HRG/CYP2E1/CYP2C8/CYP2C9/CYP8B1/

HSPA8/TCIRG1/CHD3/ATP6AP1/ABCB6/XRCC2/SMARCA4/HSP90AB1/DYNLL1/DYNC1H1/XRCC3/ATP

/SLC16A11/SLC1A2/SLC6A12/SLC17A2/SLC6A1/SLC38A4/SLC13A5/SLC22A1/SLC10A1

/CYP2A7/PAH/AOX1/CYP1A2/CYP4F2/CYP7A1/CD01/CYP2B6/CYP4A11/CYP2E1/CYP2C8/CYP2C9/

SP1/ARID3B/CCAR1/LDB1/NFYA/ATF6B/HOXB6/HNRNPC/MBD2/RELA/SMAD2/PBX3/SMAD3/TP53/Z

IAS3/KCTD10/RNF26/UBE2L3/CBX4/RNF187/RNF157/ANAPC11/UBE2D1/RNF220/RNF113A/ZMIZ2

LC25A15/ABCB11/MFSD2A/SLC38A3/SLC51A/SLC16A11/SLC01B3/SLC27A2/SLC1A2/SLC6A12/SL  
P1A1/CYP4F3/CYP3A5/CYP2A7/PAH/FMO3/CYP1A2/AKR1D1/CYP4F2/CYP7A1/CYP2B6/CYP4A11/C  
LC25A15/ABCB11/MFSD2A/SLC38A3/SLC51A/SLC16A11/SLC01B3/SLC27A2/SLC1A2/SLC6A12/SL

PL41/HNRNPD/HNRNPC/FXR1/HNRNPA2B1/RBMS2/ELAVL1/SERBP1/GEMIN5/TP53/TARDBP/PARN/R



L2/ARNT2/MCM3/RAD51AP1/HES4/ELF3/EZH2/MAF1/FOXQ1/MUC1/SOX12/ARID3A/MXD3/HMGB3/C

/TRIM54/KIF11/NUP62/RCC1/SPAG5/MAPRE1/TUBB/MAD2L1/ASPM/EZR/MID1IP1/TUBB4B/CHEK1  
BUB1B/MKI67/PRC1/KIF23/TUBA1B/MCM4/ZWINT/CKS2/ORC6/WDR62/CCNE1/CCNA2/CENPF/KIFC  
UPK3A/LAMB1/EFNA4/VASP/NBL1/ITPKA/CDC42EP1/HCK/GPC1/UNC13D/DDR1/FGD3/TWF2/MAPK8  
TGAV/SCAMP5/ABCD1/ACP5/IGF2BP1/PRNP/HRAS/SYK/PLCB1/IL18/TMSB4X/S100A8/CSF1R/HDA  
ACP5/IGF2BP1/PRNP/HRAS/SYK/PLCB1/IL18/TMSB4X/CSF1R/HDAC7/EZR/IGF2BP3/VTCN1/GBP5  
/MIF/ZP3/HLA-DPB1/PRKDC/NFKB2/CD2/EBI3/HIF1A/MAPK3/CD276/SERPINE1/IL27RA/CD3E/S  
IRT6/MTHFD1L/FRAS1/ITGA5/MSN/BRSK1/PTK7/STIL/PSMD2/HIF1A/ITGAX/FZD1/ST14/PAK1/F  
AFR/COTL1/PRKCD/LAT2/QSOX1/RELB/ITGAV/VAT1/MVP/RAB31/SYK/UNC13D/IL18/TUBB/CSTB/  
R/COTL1/PRKCD/LAT2/C1QA/QSOX1/RELB/ITGAV/VAT1/ADAM9/MVP/RAB31/SYK/UNC13D/IL18/T  
3D/TUBB/CSTB/S100A8/LYZ/NME2/CTSA/TRPM2/QPCT/RHOG/TUBB4B/GRN/TNFAIP6/CD53/PLAU/  
PM2/QPCT/RHOG/TUBB4B/GRN/TNFAIP6/CD53/PLAU/ATAD3B/CHIT1/PSMD14/TIMP2/SYNGR1/DNA  
AFR/COTL1/PRKCD/LAT2/QSOX1/RELB/ITGAV/VAT1/MVP/RAB31/SYK/UNC13D/IL18/TUBB/CSTB/  
LX2/CD74/BATF/PTAFR/COTL1/PRKCD/LAT2/C1QA/QSOX1/ITGAV/IGLL5/VAT1/MVP/RAB31/SYK/  
TSA/TRPM2/QPCT/RHOG/TUBB4B/GRN/TNFAIP6/CD53/PLAU/ATAD3B/CHIT1/PSMD14/TIMP2/SYNG  
3R/ZNF385A/TRPM2/FZD7/HMGB3/PRMT1/PSMB9/TFRC/LTB/TNFRSF18/PSMD14/HMGB2/JAK3/WAS  
NFSF9/PRKDC/CD2/IL34/JMJD6/CD3E/TCIRG1/ATP6AP1/SASH3/TPD52/UBASH3B/SOCS1/IRF1/F  
RC3/ITGB2/IRAK1/C1QC/CD74/CMTM3/CCDC88B/PTAFR/P2RX4/PRKCD/LAT2/C1QA/RELB/NCK2/I  
RBCK1/PSMD14/WASF2/BAX/MAPKAPK2/VAV1/COLEC12/PHPT1/CD300A/HLA-DPB1/ARPC4/UNC93E  
LA-DQB2/CD3E/PAK1/SLC39A10/FPR1/MNDA/THY1/THEMIS2/C3AR1/HSP90AB1/ARPC2/CTLA4/AR  
TF/DSCC1/PRKCD/GINS2/MCM10/FANCD2/POLD1/MCM7/SMG5/NME1/HRAS/PIF1/MCM3/RAD51AP1/  
T6/FAAP24/FANCG/GINS4/PRKDC/RUVBL1/MAD2L2/APEX2/FANCE/ISG15/NPM1/RBBP8/BRCA1/NS  
RT6/NAA40/RUVBL1/JMJD6/MAPK3/PYGO2/VPS72/MAP1S/MRGBP/CHD3/PAK1/TAF6/NPM1/BRCA1/  
U/ZC3H3/EFTUD2/FTSJ1/PPIH/NOL3/METTL1/RBM3/YBX1/RPS2/PABPC1/RRS1/PPP1R9B/PUF60/  
2G4/ZC3H12A/NCBP2/EEF1D/BCL3/GTPBP2/RPL17/RPLP2/EIF3D/MRPS23/CNOT9/RPSA/DAPK3/A  
B2/ALDH3B1/SNAP25/CDK16/CPLX2/PTAFR/COTL1/FERMT3/PRKCD/TOR4A/LAT2/QSOX1/ITGAV/S  
BL1/HRAS/SYK/STK39/CKLF/GPC1/PGF/TMSB4X/S100A8/CSF1R/NECTIN1/CSF3R/UNC5B/EZR/BS  
10/FANCD2/POLD1/MCM7/PIF1/MCM3/RAD51AP1/GTSE1/EEF1E1/MUC1/EME1/CDKN2D/ANKRD1/ZN  
GAP1/CCDC88B/CENPW/ARHGEF2/KLC2/HSPB1/TRIM54/KIF11/NUP62/RCC1/GTSE1/WDR34/SPAG5  
F4EBP1/SMARCD3/HRAS/PLCB1/KIF11/NUP62/RCC1/GTSE1/MAPRE1/TUBB/EZH2/CDC25A/CDK4/M  
MZB1/CLCF1/OSMR/FLNA/IRAK1/CEP131/S1PR2/CD74/CCDC88B/PTAFR/NCK2/ITGAV/SMARCD3/L  
A/SRSF9/SNRPC/GEMIN7/BUD31/DAZAP1/SNRNP40/AKAP8L/RBM19/PPIL1/RBMX2/SFPQ/CPSF1/L  
NK1D/ANAPC7/CDK2/KIF14/SPSB1/PMAIP1/PSMB4/GBA/KCTD10/WFS1/PSMB8/RNF187/PSMB10/P  
MMR/CDC25C/DTL/CEP131/CDKN2A/TUBG1/FEN1/RACGAP1/SMARCD3/PLCB1/KIF11/NUP62/RCC1/  
DNMT1/ASAP1/MUC1/GRN/NABP2/CCT6A/CFL1/MICALL2/S100A10/FSCN1/CCT3/SAE1/CARMIL1/T  
/ANKRD1/MAGED1/SCRIB/IFT57/GRN/HSF1/CARD9/AKR1C3/DDIT3/IGFBP3/TRAF2/RBCK1/HMOX1  
MB9/TFRC/APOBEC3C/RBCK1/TRIM6/CHMP4B/WASF2/TRIM28/CCL5/BAX/CD86/CXCR4/NUP210/IT  
PA8/RPL36A/DKC1/PPP2R1A/NPM1/UPF3B/POLR2G/ZC3H3/EFTUD2/PPIH/NOL3/RBM3/YBX1/RPS2  
HMT2/AKAP8L/IL1B/MTA2/CDK5/KDM5B/PHB/MIER2/TAF9/SFPQ/DNMT3A/SIRT7/NAP1L2/KDM5C/  
15RA/HLA-DRB1/SYK/PLCB1/HLA-DQA1/STK39/HCK/IL18/TMSB4X/MX2/HLA-DRA/CSF1R/F13A1/  
KIF18A/CFL1/SMARCD1/FSCN1/CTSK/HMGB2/CARMIL1/TIMP2/EIF5A2/BAX/NCKAP5L/SH3PXD2B/  
/RPSA/NLE1/SRSF9/SNRPC/GEMIN7/RPL10L/EMG1/NOP58/ATXN2L/RPS5/ZNF593/UTP18/RPS21/  
/HRAS/CDC42EP1/USH1C/HCK/FHL3/ZYX/TMSB4X/FGD3/TWF2/FMNL2/CSF1R/SMIM22/EZR/ANKRE  
ABEP2/TCTN2/SSNA1/PPP2R1A/LAMA5/CORO1C/TUBA1A/TTL1/SFI1/DYNLRB1/IFT52/F2RL1/AR  
C/HCK/FHL3/ZYX/TMSB4X/FGD3/TWF2/FMNL2/CSF1R/SMIM22/EZR/ANKRD1/TRPM2/RHOG/FMNL1/  
MGB3/PRMT1/PSMB9/TFRC/TNFRSF18/PSMD14/HMGB2/JAK3/WASF2/TCF3/BAX/CD86/VAV1/SEMA4  
AL2/PIR/FSTL3/BATF2/TFE3/NCAPG2/LEF1/IRF7/SNX10/NCKAP1L/PIP4K2A/EVI2B/CDKN2B/PI  
TAFR/FERMT3/PRKCD/SERPINI1/NCK2/PLXNA3/ITGAV/EMILIN2/PRNP/ADAM9/SYK/UNC13D/DDR1  
PC1/DDIT3/CTSK/TRAF2/RBCK1/PSMD14/FBXL19/TIMP2/CHMP4B/FAM83D/VPS37C/MSN/ABHD12/  
SPB1/SLAMF8/PLXNA3/ITGAV/LAMB1/ADORA1/ADAM9/NBL1/HRAS/PLCB1/STK39/GTSE1/PGF/MAF  
CK2/PLXNA3/CBX6/LAMB1/EFNA4/NME1/VASP/NBL1/ITPKA/USH1C/NPTX2/GPC1/DDR1/EZH2/NME

R/ANKRD1/DCDC2/TRPM2/TRPV2/RHOG/PLEK2/GRN/CRMP1/CFL1/RHOQ/FSCN1/LINGO1/CARMIL1/  
/TRIM11/RNF34/UBE2I/UBE2Q2/RNF19B/SHARPIN/ISG15/BRCA1/NSMCE2/STX1A/PCNA/MED10/T  
PC4/STX3/SQSTM1/YWHAZ/GPC3/FLNA/ITGB2/CEP131/SNAP25/CDK16/KCNJ11/TAX1BP3/PRKCD/  
/RAN/UBL4A/GLIS2/NABP2/CCT6A/MICALL2/RANGAP1/DDIT3/CCT3/SAE1/CHMP4B/TRIM28/BAX/  
P1/USH1C/MCM3/NAP1L1/HCK/MAPRE1/CENPO/TMSB4X/MX2/TWF2/MAPK8IP2/HLA-DRA/CENPU/SC  
28B/NUP210/SLFN13/ENTPD6/DHX34/PCBP4/PDE4A/MRT04/DCTPP1/FOXK1/NT5C3A/CNOT11/PSM  
SB1/DDX27/NOP2/GTPBP4/NHP2/PUS1/POP7/URM1/DTT1/SNAPC2/EMG1/NOP58/TRMT1/SSB/TRMT  
/LYZ/NME2/CTSA/TRPM2/QPCT/RHOG/TUBB4B/GRN/TNFAIP6/CD53/PLAU/ATAD3B/CHIT1/PSMD14  
/PTAFR/FERMT3/ARHGEF2/P2RX4/ROB1/HSPB1/SLAMF8/PLXNA3/ITGAV/LAMB1/ADORA1/ADAM9/  
D151/GRN/TNFAIP6/GLIPR2/MGAT5/PLAU/TNFRSF18/ARHGEF39/CARMIL1/CHMP4B/HMOX1/RHOC/  
PBB1IP/VAV1/DDOST/SEMA4A/TNFSF9/FKBP1A/CD300A/FLOT2/MSN/ZP3/HLA-DPB1/PRKDC/CD2/  
/LYZ/NME2/CTSA/TRPM2/QPCT/RHOG/TUBB4B/GRN/TNFAIP6/CD53/PLAU/ATAD3B/CHIT1/PSMD14  
BL1/HRAS/SYK/STK39/CKLF/GPC1/PGF/TMSB4X/S100A8/CSF1R/NECTIN1/CSF3R/UNC5B/EZR/BS  
P1CA/MRPL9/PA2G4/ZC3H12A/NCBP2/EEF1D/BCL3/GTPBP2/RPL17/RPLP2/EIF3D/MRPS23/CNOT9  
T57/GRN/HSF1/CARD9/AKR1C3/DDIT3/IGFBP3/TRAF2/RBCK1/HMOX1/PLEKHG2/CCL5/BAX/BRMS1  
.1/ITGAV/ADORA1/PRNP/ARNT2/HRAS/NUP62/HCK/NME2/MAPK8IP2/MAD2L1/DNMT1/CSF1R/FOXQ1  
T57/GRN/HSF1/CARD9/AKR1C3/DDIT3/IGFBP3/TRAF2/RBCK1/HMOX1/PLEKHG2/CCL5/BAX/BRMS1  
.1/ITGAV/ADORA1/PRNP/ARNT2/HRAS/NUP62/HCK/NME2/MAPK8IP2/MAD2L1/DNMT1/CSF1R/FOXQ1  
SMB4/GBA/KCTD10/WFS1/PSMB8/RNF187/PSMB10/PSMA5/DNAJB2/TAF9/PSMD13/PSMC4/GSK3A/F  
C42EP1/NUP62/HCK/SPAG5/MAPRE1/TMSB4X/TWF2/ASAP1/NECTIN1/EZR/COL16A1/DCDC2/TRPM2  
A/SIRT6/CCL26/MSN/IQGAP1/SRPX2/ARPC4/AMIGO2/SH3PXD2B/EFNA5/LCP1/PAK1/BAIAP2L1/T  
/RAN/CFL1/PSMB9/TFRC/APOBEC3C/RBCK1/TRIM6/CHMP4B/WASF2/TRIM28/CCL5/BAX/CD86/CXC  
CRIB/SLC25A6/RPL8/RAN/CFL1/PSMB9/TFRC/APOBEC3C/RBCK1/TRIM6/CHMP4B/WASF2/TRIM28/  
KA/STC2/CTSV/WFDC2/ADA/GNPDA1/HAVCR2/CLGN/CDC25C/PAQR5/BIRC3/CEP131/PI3/CDK16/R  
L/CEP131/CDKN2A/MCM6/TUBG1/EIF4EBP1/MCM10/SMARCD3/MCM7/PLCB1/USH1C/MCM3/RCC1/GT  
B1/SNAP25/CPLX2/PTAFR/COTL1/FERMT3/PRKCD/TOR4A/LAT2/QSOX1/ITGAV/SCAMP5/VAT1/PLE  
A-DRB1/HRAS/SYK/HLA-DQA1/HCK/UNC13D/ZYX/IL18/TUBB/MX2/S100A8/HLA-DRA/CSF1R/APOE  
C/PSMD2/PAK1/MNDA/SOCS1/IRF1/IRF3/HSP90AB1/F2RL1/STAT1/RAB7B/LRRC14/NPLOC4/TRAF  
GEF2/P2RX4/ROB1/SERPINI1/PLXNA3/SMARCD3/NME1/NBL1/ITPKA/SYK/PLCB1/NAP1L1/GPC1/  
/SCRIB/CHEK1/RHNO1/NABP2/PRMT1/PSMB9/DDIT3/PSMD14/TIMP2/ESPL1/BAX/MIF/LCMT1/NAA  
/PRNP/ADAM9/MVP/HRAS/SYK/STK39/NUP62/IL18/EZH2/CDC25A/CDK4/DLG3/CSF1R/CDKN2D/MA  
NC13D/IL18/PAG1/CD151/SLAMF7/FZD7/HMGB3/TNFAIP8L2/VTCN1/CD320/TFRC/HLA-DPA1/HLA  
D2/CDC25C/RAD54L/FLNA/TUBG1/RACGAP1/DSCC1/NCAPH/FANCD2/PLCB1/KIF11/NUP62/RCC1/S  
RPM2/FZD7/HMGB3/PRMT1/PSMB9/TFRC/LTB/TNFRSF18/PSMD14/HMGB2/JAK3/WASF2/TCF3/BAX/  
/PSMD14/HNF1B/AREG/TRIM28/RHOC/COL5A1/CXCR4/SIRT6/MTHFD1L/FRAS1/ITGA5/FKBP1A/MS  
2/VTCN1/CD320/GRN/RPS6KA1/TFRC/HLA-DPA1/HLA-DMB/TNFRSF18/VSIG4/JAK3/HMOX1/CCL5/  
TK39/HCK/CKLF/GPC1/PGF/SLC7A5/S100A8/CSF3R/BSG/TRPM2/MMP1/DOK2/TNFRSF18/HMOX1/E  
EBP1/ARHGEF2/PRKCD/PLXNA3/SCAMP5/VAT1/PRNP/TRIM54/MTMR2/PIF1/MAPRE1/TMSB4X/TWF2  
LNA/CD74/PKN1/PTAFR/FERMT3/ARHGEF2/P2RX4/ROB1/HSPB1/SLAMF8/PLXNA3/ITGAV/LAMB1/  
CD151/GRN/TNFAIP6/GLIPR2/MGAT5/PLAU/TNFRSF18/ARHGEF39/CARMIL1/HMOX1/RHOC/BDKRB1  
/PKN1/DUSP5/DSCC1/PRKCD/ROB1/HSPB1/NCK2/SLAMF8/ADORA1/PRNP/ADAM9/MVP/HRAS/SYK/  
B4X/S100A8/ASPH/GIT1/ASAP1/ADAP2/CASP4/SCRIB/RHOG/IFT57/GRN/GNA15/HSF1/TBC1D16/  
WF2/CSF1R/SMIM22/TRPM2/RHOG/MID1IP1/CHEK1/RASSF7/KIF18A/CFL1/RHOQ/S100A10/FSCN1  
MAD2L1/STARD3NL/YKT6/ASPM/EZR/SCRIB/TUBB4B/RAN/TMEM201/RAB34/KIF3C/KIF18A/GIPC1  
8A/GIPC1/DTNBP1/AREG/CHMP4B/HMOX1/ESPL1/DNAJC5/TRAPPC4/FAM83D/MAP2/CD300A/STXB  
D3/HES6/NME1/NBL1/ITPKA/MTMR2/NAP1L1/HES4/EZH2/NME2/TWF2/ASAP1/NECTIN1/ASPM/COL  
/P3H1/CXCR4/SEMA4A/IQGAP1/SRPX2/PTK7/AMIGO2/EFNA5/SF3A2/IL34/RGS14/HIF1A/ITGAX/  
01/SERPINI1/SLAMF8/PLXNA3/SMARCD3/HES6/NME1/NBL1/ITPKA/NAP1L1/UNC13D/HES4/EZH2/  
X2/KCNJ11/TAX1BP3/P2RX4/PRKCD/SLC7A11/B3GAT3/PRNP/HRAS/SYK/ABHD17C/MTMR2/NUP62/  
CD44/IRAK1/CD74/ARHGEF2/BCL2A1/PRKCD/HSPB1/ITGAV/SLC7A11/ADORA1/PRNP/ARNT2/HRAS  
MX2/ASAP1/YKT6/SYNGR2/SCRIB/TLCD1/SPAG4/UBL4A/DNAJC6/RAB34/S100A10/TFRC/AREG/CH

PRKDC/FOXK1/RUVBL1/MAD2L2/PSMD2/HIF1A/JOSD2/TRIM11/RNF34/UBE2I/UBE2Q2/RNF19B/SH2/IFT57/TUBB4B/RAB34/KIF3C/SAC3D1/FSCN1/ABCC4/CHMP4B/RABEP2/RAB32/TCTN2/VPS37C/F1/RHOQ/S100A10/CHMP4B/BAX/RAB32/SSR2/FLOT2/MTCL1/VPS37C/PKDCC/RAB15/SEC61A1/ZL/HSF1/NCF1/PRMT1/CARD9/DDIT3/DTNBP1/TRAF2/YBX3/TRIM28/BAX/MAPKAPK2/SIRT6/NUP210/42EP1/USH1C/COLGALT1/HCK/MAPRE1/ZYX/SERPINH1/TMSB4X/TWF2/EZR/COL3A1/ANKRD1/RHOG/RMT3/PRKCD/ROB1/HSPB1/NCK2/ITGAV/SLC7A11/LAMB1/PRNP/PLEK/ADAM9/SYK/CDC42EP1/ILN2/SSNA1/PPP2R1A/LAMA5/COR01C/TUBA1A/TLL1/SFI1/DYNLRB1/IFT52/F2RL1/ARPC2/DYNLRD1/DCDC2/TRPM2/TRPV2/RHOG/PLEK2/GRN/CRMP1/CFL1/RHOQ/FSCN1/LINGO1/CARMIL1/WASF2/ZNF385A/ARID3A/CDC7/TUBB4B/CHEK1/PRMT1/PSMB9/PSMD14/ESPL1/BAX/FAM83D/LCMT1/PCBF/PRC1/KIF23/MCM4/ZWINT/CKS2/ORC6/WDR62/CCNE1/CCNA2/CENPF/KIFC1/SAPCD2/KIF18B/ORCL3/CD83/TFE3/NCAPG2/PRELI1/PSMB2/LEF1/IRF7/ZC3H12A/PSME3/LAG3/NCKAP1L/ADAM8/EV5/EZR/RHOG/RAN/GLIS2/RAB11FIP5/ANXA13/CCT6A/MICALL2/RANGAP1/RHOQ/EPB41L2/GPD1L/R/FERMT3/ARHGEF2/P2RX4/ROB1/HSPB1/SLAMF8/PLXNA3/ITGAV/LAMB1/ADORA1/ADAM9/NBL1/GRN/TNFAIP6/GLIPR2/MGAT5/PLAU/TNFRSF18/ARHGEF39/CARMIL1/HMOX1/RHOC/BDKRB1/CCL5/1/CPSF1/LSM2/PQBP1/SRSF12/PRCC/ISY1/RNF113A/EIF4A3/PRPF3/SNU13/SRRT/PRPF6/POLR2L1/CPSF1/LSM2/PQBP1/SRSF12/PRCC/ISY1/RNF113A/EIF4A3/PRPF3/SNU13/SRRT/PRPF6/POLR2L1/CPSF1/LSM2/PQBP1/SRSF12/PRCC/ISY1/RNF113A/EIF4A3/PRPF3/SNU13/SRRT/PRPF6/POLR2LGT1/MMP2/NOL3/LMNA/S100B/PLOD2/HYOU1/PSMB2/DDIT4/PPARD/PSME3/PAM/MT3/NPEPPS/ADA/CSTB/S100A8/LYZ/NME2/CTSA/TRPM2/QPCT/RHOG/TUBB4B/GRN/TNFAIP6/CD53/PLAU/ATAD3B/RC/HLA-DPA1/HLA-DMB/TNFRSF18/VSIG4/JAK3/HMOX1/CCL5/CD86/VAV1/TNFSF9/MIF/CD300A/IPF3/RBCK1/PSMD14/WASF2/BAX/MAPKAPK2/VAV1/COLEC12/PHPT1/CD300A/HLA-DPB1/ARPC4/USF9/SNRPC/GEMIN7/BUD31/DAZAP1/SNRNP40/AKAP8L/RBM19/PPIL1/RBMX2/SFPQ/CPSF1/LSM2/LS1/U2AF2/SRSF9/GEMIN7/XPOT/SSB/ZNF593/AKAP8L/IL1B/CDK5/TXN/CPSF1/THOC5/NUP85/FITGA5/TNFSF9/CD300A/SELPLG/FLOT2/MSN/ZP3/HLA-DPB1/EBI3/CD276/EFNB1/CD3E/PAK1/SAGEF39/TIMP2/HMOX1/WASF2/TRIM28/RHOC/PLEKHG2/RAB6B/VAV1/RAB32/ARFGEF3/DOK1/GPR35/LR2G/RBM3/YBX1/PABPC1/NUP93/TRNAU1AP/NUP205/NUP37/PSMB2/PPP1CA/PA2G4/NDC1/POLR2MIIP/PRKDC/MAD2L2/CNOT11/PSMD2/NPM1/RBBP8/CHMP4C/BRCA1/RBL1/PCNA/CTDSPL/HSP90AENKRD27/NRCAM/THY1/RTN4RL2/RELN/ZSWIM5/MARK2/GDI1/EPHB3/FGFR1/MT3/DYNLT1/DVL3/VL/LAMC1/MMP1/CREB3L1/COMP/PLOD1/FSCN1/CTSK/TIMP2/COL5A1/ITGA5/SH3PXD2B/NFKB2/ITGFAIP6/GLIPR2/MGAT5/PLAU/TNFRSF18/ARHGEF39/CARMIL1/HMOX1/RHOC/BDKRB1/CCL5/CXCR4/STMN3/MRPS34/TRMT112/VIL1/CHMP3/DENR/MAP1LC3B/DVL2/SET/MRPL13/SMARCB1/NES/KIF2A2/MAP1S/CENPE/DKC1/ACD/BRCA1/NSMCE2/CCT2/LMNA/SPDL1/XRCC3/DDX11/NELFE/RPS6KA4/CRPC4/HSPA8/LCP1/PAK1/BAIAP2L1/ANKRD27/STX1A/FCHSD1/BMF/BIN1/ARPC2/ARPC3/SUB1/CC1/TUBB/CSTB/S100A8/LYZ/NME2/CTSA/TRPM2/QPCT/RHOG/TUBB4B/GRN/TNFAIP6/CD53/PLAU/ATPM2/QPCT/RHOG/TUBB4B/GRN/TNFAIP6/CD53/PLAU/ATAD3B/CHIT1/PSMD14/TIMP2/SYNGR1/DNAL/CEP131/CDKN2A/MCM6/TUBG1/EIF4EBP1/MCM10/SMARCD3/MCM7/PLCB1/USH1C/MCM3/RCC1/GT/GIPC1/ESPL1/BAX/FAM83D/MIF/PCBP4/CASP2/CNOT11/NPM1/BRCA1/NSMCE2/PCNA/CKS1B/HSPNB1/HCLS1/U2AF2/SRSF9/GEMIN7/XPOT/SSB/ZNF593/AKAP8L/IL1B/CDK5/TXN/CPSF1/THOC5/NMISP/ECT2/NUSAP1/CCNF/TGFB1/SKA1/RCC2/AURKA/UNC119/PSRC1/SPC24/NCAPD2/CDC25C/SMAGED1/DTNBP1/TRAF2/MAPKAPK2/CXCR4/MIF/CD300A/IQGAP1/RGS14/MAPK3/MAP2K2/PPP2R1A/CREB3L1/DDIT3/TRAF2/RBCK1/HMGB2/YBX3/HMOX1/BAX/MIF/BEX3/CASP2/PRKDC/CREB3/HIF1AK1/BAIAP2L1/FCHSD1/BIN1/F2RL1/ARPC2/ARPC3/LIMCH1/COR01B/HIP1R/NCKAP1L/TUBB4A/CPSMD13/PSMC4/SRSF12/SET/PSMD10/PSMD11/CPSF6/PSMD1/PSMA7/EXOSC5/YWHAB/SAMD4B/PSMTCL1/MSN/IQGAP1/CARD10/OAZ1/DKC1/PAK1/MCRS1/SLC51B/CCT2/HSP90AB1/CNPY4/ZC3H12A/1/CNPY4/KRT18/SLC9A3R1/GPSM2/FLOT1/RTKN/RANGRF/ITGB1BP1/EHD2/ACTB/RAP2A/CDK5/MYAD2/CDC25C/RAD54L/FLNA/TUBG1/RACGAP1/DSCC1/NCAPH/FANCD2/PLCB1/KIF11/NUP62/RCC1/SIB2/CD3E/PAK1/SLC39A10/FPR1/MNDA/THY1/THEMIS2/C3AR1/HSP90AB1/ARPC2/CTLA4/ARPC3/W3/NCBP2/RPL17/RPLP2/CNOT9/LSM7/RPSA/SLC11A1/RNASE2/SSB/RPS5/PSMB4/RPS21/PSMB8/RPS5/PSMB4/RPS21/PSMB8/RPL7/RPL28/PSMB10/PSMA5/LSM2/PSMD13/PSMC4/RPL39/EDC3/RPLTPM2/ARPC4/SH3PXD2B/SLC9A1/MAD2L2/LCP1/TPM3/PAK1/BAIAP2L1/FCHSD1/RHOF/ITGB5/COR/ACD/NPM1/SLC35F6/ANKRD27/BRCA1/NOL3/LMNA/SPDL1/XRCC3/PRELI1/COR01B/HIP1R/OTUE

300A/FLOT2/ZP3/HLA-DPB1/EFNA5/EBI3/MAD2L2/CD276/EFNB1/CD3E/PAK1/SASH3/THY1/UBAS  
2RL1/ARPC2/DYNLL1/RELN/MARK2/GDI1/CORO1B/FGFR1/DYNLT1/DVL3/VLDLR/KDM1A/LYN/RAC1  
/CRABP2/BAIAP2L1/NRCAM/SLC12A8/FCHSD1/RAB3B/BIN1/HSP90AB1/F2RL1/ARPC2/ARPC3/GDI  
OP1/CPSF1/TRMT112/NSUN5/TRMT6/MPHOSPH6/BYSL/RPL35A/LYAR/INTS1/USP14/RNF113A/RRF  
GT1/MMP2/NOL3/LMNA/S100B/PLOD2/HYOU1/PSMB2/DDIT4/PPARD/PSME3/PAM/MT3/NPEPPS/ADA  
RCA4/PPIH/TRIM59/F2RL1/STAT1/PABPC1/HDAC1/NPLOC4/LY86/LEF1/NELFE/POLR2H/PPIA/ZC  
FNB1/CD3E/PAK1/SASH3/TNFRSF4/SLC39A10/THY1/SIRPA/SOCS1/F2RL1/CTLA4/CD83/PDCD1/T  
D/NPM1/FGFR4/BRCA1/PCNA/ZNF93/CCT2/HSP90AB1/TICRR/E2F8/PARPBP/RFC2/DDX11/FGFR1/  
1/TNFSF9/MIF/CD300A/FLOT2/ZP3/HLA-DPB1/CD2/EBI3/MAD2L2/CD276/EFNB1/IL27RA/CD3E/  
BAX/SIRT6/PRDX1/PRKDC/PROM1/HIF1A/TFF3/MAPK3/TCIRG1/DKC1/ATP6AP1/ACD/SASH3/NSMC  
IF1A/ATP6AP1/PAK1/GNGT1/MMP2/NOL3/LMNA/S100B/PLOD2/HYOU1/PSMB2/DDIT4/PPARD/PSME  
P2/RPS5/CDK5/ZDHHC18/RPS21/RPL7/RPL28/ZDHHC1/RAB10/RPL39/RPL35A/YWHAQ/YWHAB/RPS  
ZNF385A/ARID3A/CDC7/TUBB4B/PRMT1/PSMB9/PSMD14/ESPL1/BAX/LCMT1/PCBP4/CASP2/BRSK1  
/SERPINE1/RNF34/PPP2R1A/PEA15/SLC35F6/BRCA1/BCL2L12/BMF/NOL3/LMNA/HDAC1/DDIAS/H  
1/SASH3/TNFRSF4/SLC39A10/THY1/SIRPA/SOCS1/F2RL1/CTLA4/CD83/PDCD1/TNIP2/SIRPG/NC  
8/BRCA1/PCNA/CHAF1A/TOP1MT/TICRR/E2F8/RFC2/DDX11/FGFR1/PNKP/BLM/FBX05/DBF4/GTPE  
PH/FANCD2/OIP5/NUP62/RCC1/SPAG5/MAD2L1/EME1/RAN/KIF18A/CHMP4B/ESPL1/FAM83D/LCMT  
1/MIIP/PRKDC/MAD2L2/CNOT11/PSMD2/CHMP4C/BRCA1/RBL1/PCNA/CTDSPL/SPDL1/XRCC3/TICR  
/PAK1/SASH3/THY1/SIRPA/SOCS1/IRF1/CTLA4/CD83/PLA2G2D/PRELID1/PDCD1/ZC3H12A/LAG3  
FBX05/TUBB4A/CAPZA1/RANGRF/CSNK1D/MKKS/FHOD3/CAMSAP2/HCLS1/PSTPIP1/ARPC5L/FKBP4  
FNB1/CD3E/SASH3/TNFRSF4/SLC39A10/MNDA/IRF1/CTLA4/PLA2G2D/LEF1/NCKAP1L/SLC11A1/C  
IF4A3/ISG20/EXOSC5/SNU13/GNL2/RPL27/FTSJ3/DROSHA/VCX/RPL35/PPAN/DDX54/RPS19/RPL  
1/F2RL1/CCL13/TNFRSF11A/CORO1B/LEF1/PIP5K1C/FGFR1/NCKAP1L/ADAM8/CCL2/PIK3CD/CXC  
-DPB1/IL34/EBI3/CD276/EFNB1/CD3E/TCIRG1/SASH3/TNFRSF4/SLC39A10/MNDA/IRF1/F2RL1/  
CD3E/PAK1/SASH3/THY1/SIRPA/SOCS1/IRF1/CTLA4/CD83/PLA2G2D/PDCD1/ZC3H12A/LAG3/SIR  
O/MMP2/SIRPA/NOL3/GPX8/GPX7/ZC3H12A/MT3/NONO/HDAC2/ATF4/CDK2/TXN/SFPQ/PML/PARP1  
BRCA1/NSMCE2/MCRS1/XRCC2/ACTL6A/XRCC3/PARPBP/LEF1/BLM/NONO/AUNIP/KDM1A/WAS/SWI5  
/KIF15/SFPQ/AP3M2/DYNC1L11/WASF1/MAP4/IFT80/KIF2A/BAG3/CDC42/DNAL4/APP/ACTL8/AF  
F1/THOC5/NUP85/NUP43/SLC29A3/AGFG1/THOC6/RAE1/CPSF6/EIF4A3/XPO5/NUP155/CPSF4/NU  
P36/EIF4A3/ISG20/EXOSC5/SNU13/RPL27/NCL/FTSJ3/DROSHA/RPL35/GTF3C2/DDX54/RPS19/N  
3/CHMP1A/TDRKH/NUP107/NCOR2/POLR2K/HELLS/PCGF2/TRIM71/PIWIL4/SEC13/DOT1L/HAT1/M  
L/SFPQ/CPSF1/CACNG4/THOC5/NUP85/NUP43/IFT80/AGFG1/THOC6/RAE1/EIF4A3/NUP155/CPSF  
1/TNFSF13B/CDH17/PTPN6/CD27/SAMSN1/CD79A/MSH2/SWAP70/SKAP2/BTK/PELI1/IGBP1/GPR1  
FI1/DYNLL1/DYNC1H1/TICRR/CSNK1E/PSMB2/PSME3/PPME1/HAUS1/BLM/FBX05/TUBB4A/CDKN2E  
1/CTLA4/CD83/PDCD1/TNIP2/SIRPG/NCKAP1L/ADAM8/CCL2/HSPH1/CD209/LYN/CARD11/RAC1/C  
DIT4/SLC9A3R1/BID/BCAP31/BCL3/NOC2L/NONO/ATF4/BBC3/KDM1A/PMAIP1/WFS1/TAF9/SFPQ/  
AB1/F2RL1/ARPC2/RAB7B/ARPC3/WIPF1/PIP5K1C/TGM2/SIRPG/ACTG1/NCKAP1L/MY01G/CCL2/M  
B/CDKN2B/CDK2/CDKN1C/LAMTOR5/CDK5/LAMTOR1/TGFB2/RASSF1/PML/MLF1/CDC123/CDKN2C/C  
/DYNLL1/DYNC1H1/PSMB2/RAB35/PSME3/BCAP31/ERAP2/LAG3/CD68/HLA-DQA2/CTSE/CAPZA1/S  
F6/EIF3H/VCX/AGO2/SF3A3/PPAN/RPS19/RPLP0/RRP7BP/SNRPG/RPL38/MAPT/PRPF31/RPL23A/  
RAC1/JCHAIN/CTTN/WAS/CDH17/VIL1/PSMC4/PFN1/WASF1/PARP1/PIEZO1/RPS3/GRB2/CDC42EF  
NOT11/RBBP8/RBL1/PCNA/CTDSPL/E2F8/PRMT2/E2F4/PIM2/PSME3/BID/FBX05/DBF4/CNOT9/CL  
CD3E/SASH3/TNFRSF4/SLC39A10/MNDA/IRF1/CTLA4/PLA2G2D/LEF1/NCKAP1L/SLC11A1/CD209/  
IT1/DNASE2/RPS19/AXL/FADD/HCAR2/GPR183/ABL1/TNFAIP3/BCL10/ACVR1B/PTPN2/ADAM17/N  
3CD/LYN/HLA-DRB5/CARD11/CBFB/PSMB4/BCAR1/PSMB8/NFAM1/PSMB10/LCP2/PSMA5/WAS/LCK/  
CA/NCAPH2/PSMD13/CYP26B1/TUBG2/CALR/TDRKH/MYBL1/RAD21/MSX1/WNT4/PIWIL4/RAD51C/L  
2/RFC2/E2F4/DDIT4/BCL3/BLM/NOP2/NOC2L/CNOT9/HDAC2/CDK2/KDM1A/PMAIP1/KMT5A/EHMT2  
11/NPM1/BRCA1/NSMCE2/PCNA/DYNC1H1/XRCC3/TGFA/E2F8/DDX11/E2F4/FGFR1/GPSM2/FBX05/  
H/KIF11/NUP62/RCC1/SPAG5/MAD2L1/CHEK1/RAN/KIF18A/CHMP4B/ESPL1/LCMT1/NAA10/MAD2L  
AP2M1/FGFR2/DVL2/PFN1/AP2S1/PSMD10/PSMD11/VDR/PSMD1/PSMA7/TACSTD2/PSMB3/PAX8/AR  
BL1/PCNA/CTDSPL/E2F8/PRMT2/E2F4/PIM2/PSME3/BID/FBX05/DBF4/CNOT9/CDKN2B/CCL2/CDK

1/TICRR/CSNK1E/PSMB2/PSME3/PPME1/HAUS1/BLM/FBX05/TUBB4A/CDKN2B/CSNK1D/CDK2/KIF1  
BATF3/SBN02/CDC42/APP/LILRB4/FADD/ZNF675/GPR183/CCL3/PTPN2/CASP8/VEGFA/LBR/TLR2  
PSTPIP1/ARPC5L/RAC1/CTTN/MYADM/WAS/VIL1/CIT/PFN1/WASF1/CAPZB/GRB2/ARHGAP18/SWAP  
7/POLR2K/RPL18A/RPS19/RPLP0/RPL18/RPL23/RPL38/RPL23A/SUPT5H/MCTS1/CCL3/SEC13/RF  
/FLOT1/NCKAP1L/ADAM8/CCL2/CXCL13/HSPH1/CD209/LYN/CARD11/RAC1/CBFB/IL1B/IL2RA/CE  
P107/CETN2/SLBP/KHDRBS1/HNRNPA3/CKAP5/CHTOP/SEC13/SYMPK/CPSF3/RPS15/NOL6/MRPL18  
P107/CETN2/SLBP/KHDRBS1/HNRNPA3/CKAP5/CHTOP/SEC13/SYMPK/CPSF3/RPS15/NOL6/MRPL18  
/IRF1/CTLA4/PLA2G2D/NCKAP1L/CD209/LYN/CARD11/IL1B/IL2RA/TNFSF13B/PTPN6/IL12RB1/  
1/CHAF1A/TOP1MT/ERCC6L/RFC2/DDX11/NCAPG2/BLM/NOC2L/ITGB3BP/SMC4/NASP/AKAP8L/NCA  
3/PRPF6/EIF3H/VCX/AGO2/SF3A3/PPAN/RPS19/RPLP0/RRP7BP/SNRPG/RPL38/MAPT/PRPF31/RF  
F18A/CHMP4B/ESPL1/FAM83D/LCMT1/NAA10/SGO2/MAD2L2/CENPE/PPP2R1A/CHMP4C/NSMCE2/SG  
PZA1/MKKS/FHOD3/HCLS1/TESK1/ITGB1BP1/ARPC5L/RAC1/CD47/CTTN/MYADM/WAS/VIL1/CIT/F  
A/CTDSPL/SPDL1/XRCC3/TICRR/E2F8/PRMT2/E2F4/PSMB2/PSME3/BLM/FBX05/CNOT9/CDKN2B/C  
IL1/CD27/IFI16/CASP1/PML/GPX1/RPS3/TFAP4/CST7/ARRB2/DNAJB6/DPEP1/CTSD/HSPE1/CAR  
BABAM1/RFWD3/MSX1/RAD9A/OGG1/RPA2/PPP4C/TIMELESS/PTTG1IP/MAPT/EID3/ABL1/WRAP53/  
F1/THOC5/NUP85/NUP43/AGFG1/THOC6/RAE1/CPSF6/EIF4A3/RUVBL2/XPO5/PRPF6/NUP155/CPS  
P4/SNX27/SIPA1L3/ARF4/PARVG/PARD6B/LLGL1/CDC42/PRKCI/ACTL8/STK25/RACK1/WDR1/PAR  
/MND4/IRF1/CTLA4/PLA2G2D/NCKAP1L/CD209/LYN/CARD11/IL1B/IL2RA/TNFSF13B/PTPN6/IL1  
/CARD11/RAC1/CBFB/IL1B/IL2RA/CD47/TNFSF13B/LCK/PTPN6/CD27/IL12RB1/IL15/RPS3/GRE  
PDL1/XRCC3/TICRR/E2F8/PRMT2/E2F4/PSMB2/PSME3/BLM/FBX05/CNOT9/CDKN2B/CCL2/CDK2/F  
1L/ADAM8/CCL2/HSPH1/CD209/LYN/CARD11/RAC1/CBFB/IL1B/IL2RA/CD47/TNFSF13B/LCK/PTF  
/SPDL1/XRCC3/TICRR/KNTC1/E2F8/E2F4/BLM/CNOT9/CDKN2B/CDK2/THOC5/PML/DYNC1LI1/PRC  
PL38/RPL23A/EXOSC3/BTG2/GSPT2/RPS7/RPL7A/RPS23/RPS10/RPS15/RPS16/RPL5/RPS27A/RF  
NOC4L/RRP7BP/TSR3/UTP11/LAS1L/UTP4/EXOSC3/NAT10/UTP6/HEATR1/SART1/NOP10/KRI1/RF  
FFA/BAG3/CALR/DNAJB6/GRPEL2/DNAJB11/HSPE1/CWC27/PDCD5/SGTB/PRDX4/DNAJC7/PDIA6/E  
L23/RPL38/RPL23A/CEMIP/ZDHHC12/MFF/RPS7/RPL7A/RPS23/RPS10/RPS15/SGTA/RPS16/RPL5  
C5L/FKBP4/RAC1/CTTN/MYADM/WAS/VIL1/PFN1/WASF1/INPP5J/RPS3/CAPZB/GRB2/ARHGAP18/C  
1/RPS3/TFAP4/ARRB2/DNAJB6/DPEP1/CTSD/HSPE1/CARD16/PDCD5/FADD/CLEC7A/RACK1/IGBP1  
4/CHMP3/IFI16/BANF1/PML/SMARCB1/ILF3/ISG20/TFAP4/POLR2L/APOBEC3D/POLR2K/TNIP1/T  
MD1/PSMA7/PSMB3/PSMD4/PSMD3/RBX1/CARD16/PSMD7/TBL2/SUV39H2/PSMD8/VHL/PSMA1/PSME  
SET/SMARCB1/SMYD3/CDK7/RBBP4/SMARCC1/CABIN1/HELLS/CETN2/RBX1/DR1/RPL23/RNF4/CEN  
L3/CXCL13/LYN/RAC1/PLA2G7/IL1B/CD47/CCL4/TGFB2/NUP85/CALCA/CCR1/C5AR1/PF4V1/CXC  
1/BLM/FBX05/TUBB4A/CSNK1D/CDK2/KIF14/DCTN2/PSMB4/PSMB8/PSMB10/PSMA5/PSMD13/PSMC  
2/MAD2L2/CENPE/PPP2R1A/CHMP4C/NSMCE2/SGO1/MSTO1/SPDL1/XRCC3/RRS1/DDX11/INCENP/F  
1/MCM8/XRCC6/POLQ/FUS/RAD21/BABAM1/RFWD3/NABP1/XRCC4/OGG1/RPA2/PPP4C/TIMELESS/F  
07/SLBP/CHTOP/SEC13/EMD/SYMPK/CPSF3/RPS15/NOL6/LTV1/SARNP/MAGOH/THOC2/XPO7/EIF5  
A/CSNK1D/CDK2/KIF14/DCTN2/PSMB4/PSMB8/PSMB10/PSMA5/PSMD13/PSMC4/HAUS8/PLK4/PSMC  
PT/PDCD6/CYCS/MTCH1/HSPD1/PIDD1/VCP/SFRP2/TRADD/BAD/BCL10/RCN3/TNFSF15/CASP8/PI  
PIK3CD/CXCL9/CXCL3/CXCL13/LYN/RAC1/PLA2G7/IL1B/CXCR3/CCL4/TGFB2/GPSM3/NUP85/CAL  
/RASSF1/POC1A/CHMP3/GSK3A/PLK4/INPP5J/RAE1/RPS3/KAT2A/CHMP1A/RANBP1/KATNB1/RNF4  
A5/WAS/LCK/PTPN6/PSMD13/PSMC4/PSMD10/PSMD11/PSMD1/PSMA7/RPS3/PRKD2/PSMB3/PSMD4/  
R/CPSF4/NUP107/SLBP/KHDRBS1/CHTOP/SEC13/EMD/SYMPK/CPSF3/RPS15/NOL6/LTV1/SARNP/M  
P107/CETN2/SLBP/KHDRBS1/HNRNPA3/CKAP5/CHTOP/SEC13/SYMPK/CPSF3/RPS15/NOL6/MRPL18  
ARPC5L/RAC1/CDK5/CD47/PFDN2/CTTN/WAS/POC1A/VIL1/PLK4/PFN1/WASF1/NES/RPS3/GRB2/F  
D3/PABPC4/PSMD7/VIM/TRIM71/PLEKHN1/HNRNPM/EXOSC3/BTG2/PSMD8/PSMA1/MYEF2/PSMB5/F  
SMD11/PSMD1/PSMA7/TACSTD2/PSMB3/PAX8/ARRB2/CDC42/PSMD4/HOXB7/PSMD3/PSMD7/WNT4/M  
KHDRBS1/RPL23A/MCTS1/RPS7/RPL7A/RPS23/RPS10/EIF3K/RPS15/RPS16/EIF3M/RPL5/RPS27A  
SM2/HAUS1/FBX05/AUNIP/CSNK1D/KPNB1/DCTN2/KNSTRN/POC1A/HAUS8/MAP4/TUBG2/RAE1/KIF

CAP31/ERAP2/LAG3/HLA-DQA2/CTSE/CAPZA1/SLC11A1/CD209/DCTN2/HLA-DRB5/DCTN5/PSMB4/  
PML/PARP1/MSH2/RPS3/PRKD2/ARRB2/PARM1/CBX8/FUS/BABAM1/CCT8/GNL3/TIMELESS/EXOSC3

2/CSPP1/CDK2AP2/PLK3/SH3GLB1/ZFYVE19/VEGFA/BCL2L1/RAB11A/KIF20B/KLHL21/RHOA/BTC  
F1/POC1A/CHMP3/GSK3A/PLK4/INPP5J/RAE1/RPS3/KAT2A/CHMP1A/RANBP1/KATNB1/RNF4/CEP2  
.C39A10/MNDA/IRF1/CTLA4/PLA2G2D/NCKAP1L/CD209/LYN/CARD11/IL1B/IL2RA/TNFSF13B/PTF  
CTSE/CAPZA1/DCTN2/HLA-DRB5/DCTN5/PSMB4/CTSS/PSMB8/KIF15/PSMB10/PSMA5/PSMD13/PSM  
/MAPT/RARG/ABL1/KCNN4/KEL/DBNL/DNM2/VEGFA/RAB11A/IFRD1/CDK5R1/SRF/RHOA/MTPN/IST  
CL10/LMO4/MTHFR/KIF20B/TWIST1/CC2D2A/STK3/GLMN/SIX1  
CTSE/CAPZA1/DCTN2/HLA-DRB5/DCTN5/PSMB4/CTSS/PSMB8/KIF15/PSMB10/PSMA5/PSMD13/PSM  
TX4/RALB/CEP250/HAUS6/NDE1/NSF/CKAP5/IQCB1/RAB3D/TMEM216/STX7/VAMP8/CEP41/HSP9C  
ASF1/CAPZB/GRB2/ARHGAP18/CDC42EP2/GMFG/ABI2/ARPC1A/BRK1/ARPC5/ACTR3/DBNL/SPIRE1  
1/RHOT2/IFT172/HOOK2/COPG2/TCTEX1D2/BICD1/HNRNPU/MAP1A/CCDC88C/ARL8B/AP3B1/IFT2  
NEB/CAPZB/GRB2/ARHGAP18/SWAP70/CDC42EP2/GMFG/ABI2/WDR1/ARPC1A/BRK1/ARPC5/ACTR3/  
GRB2/CDC42/PSMD4/PSMD3/PSMD7/IKBKG/BTK/ARPC1A/BRK1/PSMD8/ARPC5/ABL1/FCGR2B/PSMA  
RD11/IL1B/IL2RA/TNFSF13B/PSMB10/PTPN6/IL12RB1/IL15/RPS3/CD6/PNP/FADD/PELI1/RASA  
M/TRIM71/PLEKHN1/HNRNPM/EXOSC3/PSMD8/PSMA1/MYEF2/PSMB5/PSMA4/PSMD9/RPS27A/HNRNF  
6/IKBKG/AXL/FADD/ECM1/RACK1/ZNF675/CLIP3/PELI3/TNFAIP3/TRADD/PTPN2/ADAM17/CASP8  
1/RPL23/MSX1/RBBP7/RAD9A/RPA2/PTTG1IP/TAF12/TAF10/DNA2/RPS7/CHEK2/RAD1/PRKAA2/C  
HTOP/NBN/HNRNPU/ERCC1/VEGFA/SREBF1/PIH1D1/MECP2/HNRNPA1/PPhLN1/SART3/DNMT3B/MAF  
AC1/ITGA2/PLA2G7/CXCR3/CCL4/GPSM3/CCR1/ABR/C5AR1/PADI2/STK10/CALR/XCL2/CMKLR1/A  
ATP6VOD1/HSPD1/HSPA2/VCP/SRPRB/WIP1/HSP90AA1/TATDN2/PTPN2/THBS1/DCTN1/PTPN1/OF  
CAPZB/GRB2/ARHGAP18/SWAP70/CDC42EP2/GMFG/ABI2/WDR1/ARPC1A/BRK1/ARPC5/ACTR3/DBNL  
/RPLP0/RPL18/RPL23/RPL38/RPL23A/SUPT5H/CCL3/SEC13/RPS7/RPL7A/RPS23/RPS10/RPS15/  
MD4/TRPM4/PSMD3/PSMD7/TBL1XR1/CSNK1G2/JRK/PSMD8/ABL1/VCP/PSMA1/SFRP2/TNFAIP3/PS  
/CLEC7A/SUPT5H/SRPK1/BAD/ACVR1B/NOTCH1/OPTN/TRIM21/TARBP2/VPS37B/PP1E/POLR2I/PF  
/CABIN1/HELLS/CETN2/RBX1/DR1/RNF4/CENPN/RBBP7/RPA2/CUL4B/TAF12/CENPQ/CHD1L/HAT1  
6/RPA2/CCT8/POLD3/TRIM25/PTGES3/NAT10/VCP/WRAP53/NOP10/FAAP20/GAR1/HSP90AA1/RPS  
0/HAUS6/NDE1/NSF/CKAP5/IQCB1/RAB3D/TMEM216/STX7/VAMP8/CEP41/HSP90AA1/DCTN1/VPS4  
/RAD21/MSX1/WNT4/RAD51C/HSPA2/RAD51D/EME2/ACTR3/RAD1/SPIRE1/SYCE1L/ERCC1/CCNE2/  
MB/DNM1L/PDCD5/FADD/RACK1/MSX1/RAD9A/IL20RA/traf7/MFF/RPS7/NFATC4/BAD/BCL10/CTN  
ARCC1/KAT2A/HELLS/DR1/CENPN/RBBP7/INO80C/RERE/SUV39H2/CENPQ/CHD1L/MBD3/ANP32E/M  
0/DNA2/DOT1L/RAD51D/WRAP53/NOP10/DCLRE1B/GAR1/HSP90AA1/NBN/HNRNPU/ERCC1/EXOSC1C  
4/PSMD3/PSMD7/PPP4C/PSMD8/LIMS1/PSMA1/TRIP6/TRADD/PSMB5/PSMA4/PSMD9/TNFSF15/TLR  
M71/PLEKHN1/HNRNPM/EXOSC3/PSMD8/PSMA1/MYEF2/PSMB5/PSMA4/PSMD9/RPS27A/HNRNPU/EXC  
KCI/ZMYND8/GZMB/PDCD5/STX4/RACK1/CLIP3/CEMIP/MFF/STAC/STX7/CSK/VAMP8/BAD/CASP8/  
TRE1/PLK3/SH3GLB1/ZFYVE19/BCL2L1/RAB11A/KIF20B/MITD1/KLHL21/RHOA  
/POLA1/PRIM2/POLQ/RFD3/RPA2/POLD3/TIMELESS/SLBP/DBF4B/SSBP1/DNA2/EME2/CHEK2/CT  
3/CDKN1C/IL1B/DYNC1LI1/ANAPC11/ZNF207/CHMP1A/RANBP1/RAD21/MTBP/NME6  
IDD1/VCP/SFRP2/TRADD/BAD/BCL10/TNFSF15/CASP8/PDCD2/PPM1F/NDUFA13/RHOA/ANP32B/LG  
MD10/PSMD11/LTBR/PSMD1/TNFSF12/PSMA7/traf3/PSMB3/PSMD4/PSMD3/CARD16/PSMD7/IKBKG  
P5C/CARD16/IKBKG/FADD/ECM1/PELI1/TRIM25/ABL1/TRADD/BCL10/CASP8/MAVS/GOLT1B/RHOA  
51C/HSPA2/ABL1/MTA3/NSFL1C/CCND3/ADAM17/HNRNPU/RAB11A/KIF20B/MECP2/LGMN/BTC/BEC  
P/MAGOH/THOC2/XPO7/HNRNPA1/EIF5A/POLR2D/DHX9/NXT2/RBM15B/SEH1L/KHSRP/THOC1/DHX3  
FBX05/DAPK3/CDKN1C/IL1B/DYNC1LI1/ANAPC11/ZNF207/CHMP1A/CALR/RANBP1/RAD21/MTBP/N  
TN2A2/BTG2/PIDD1/CHEK2/CCND3/ADAM17/CDK2AP2/PLK3  
A/CHMP4C/NSMCE2/SGO1/MSTO1/SPDL1/XRCC3/RRS1/INCENP/FBX05/KIF14/KPNB1/SMC4/KNSTR  
O/DNA2/RAD51D/WRAP53/NOP10/DCLRE1B/GAR1/HSP90AA1/NBN/HNRNPU/ERCC1/EXOSC10/CCNE2  
/PSMD4/PSMD3/PSMD7/WDR1/MED12/PSMD8/ABL1/PSMA1/SFRP2/FOXF2/PSMB5/PSMA4/PSMD9/AF  
/FADD/ECM1/RACK1/ZNF675/CLIP3/PELI3/TNFAIP3/TRADD/PTPN2/ADAM17/CASP8/PTPN1/PIAS  
2/GMFG/ABI2/ARPC1A/BRK1/ARPC5/ACTR3/DBNL/SPIRE1/ADD3/ARHGAP28/RHOA/MTPN/SPTAN1/  
TIMELESS/PRPF19/BTG2/PIDD1/DNA2/DOT1L/EME2/CHEK2/CLSPN/RAD1/NBN/PLK3/UIMC1/INTS  
G02/PSMD4/PSMD3/PSMD7/WNT4/MED12/PSMD8/ABL1/PSMA1/SFRP2/PLCB2/PSMB5/PSMA4/PSMD9  
RB1/IL15/RPS3/CD6/PNP/FADD/PELI1

CUL4B/BTN2A2/BTG2/PID1/SUSD2/CHEK2/CCND3/ADAM17/CDK2AP2/PLK3/GLI1/ATP2B4/CNOT1  
/RACK1/MSX1/RAD9A/IL20RA/PTTG1IP/GRINA/SFRP2/RPS7/BAD/ERP29/PTPN2/STYXL1/PTPN1/  
/BLM/CNOT9/CDKN2B/CDK2/PML/DYNC1LI1/PRCC/DONSON/TIPIN/MSH2/ZNF207/TOPBP1/RFWD3/  
51D/EME2/ACTR3/RAD1/SPIRE1/SYCE1L/CCNE2/MASTL  
STAC/BAG2/HSP90AA1/THBS1/HSF4/HSPA5/HSPA14/HIKESHI/DAXX/POLR2D/DNAJC2/CCAR2/RPA  
RASAL3/GPR183  
OMM22/BNIP3L/SREBF1/TIMM10/AIP/NDUFA13/VPS11/YWHAG/ATG13/TFDP1/HAX1/CALM3/CSNK2  
/NBN/PLK3/UIMC1/INTS7/HINFP/TIPRL/CNOT10/CCAR2/CNOT3/MUS81/TFDP1/ATR/TP53BP1/HM  
ELI1/RASAL3/GPR183  
RPF19/BTG2/PID1/ABL1/CHEK2/NBN/PLK3/UIMC1/MYO6  
7/AKIRIN1/THBS1/ADAM17  
5A/POLR2D/RBM15B/SEH1L/EIF6/THOC1/DHX38/ENY2/PABPN1/SRSF1/SRSF2/CASC3/FIP1L1/RE  
A/STK3/GLMN/SIX1  
3/S100A7/CXCL17/AKIRIN1/PTGER4/THBS1/CD177/PLA2G1B  
OC1A/MAP4/TUBG2/RAE1/KIF2A/PTPA/ZNF207/CHMP1A/ACTL8/WRAP73/NDE1/DRG1/MZT1/VCP/N  
/GLMN/SIX1  
OH/THOC2/HNRNPA1/EIF5A/POLR2D/DHX9/RBM15B/SEH1L/EIF6/THOC1/DHX38/ENY2/PABPN1/SR  
DD/PELI1/RASAL3/GPR183  
RPS12/RPS4X/RPL6/RPL37/RPL27A/HSPA5/RPL36/UBA52/RPL19/RPS11/RPL13A/RPL37A/RPLP1  
2D/RBM15B/SEH1L/EIF6/THOC1/DHX38/ENY2/PABPN1/SRSF1/SRSF2/CASC3/FIP1L1/RBM8A/MAG  
BNIP3L/SREBF1/TIMM10/AIP/NDUFA13/VPS11/YWHAG/ATG13/TFDP1/HAX1/CALM3/CSNK2A2/PAR  
PA1/UBR5/TWIST1/MLLT6/DNMT3B/CTBP1/IK/UCN/PHF1/DCP2/BUB3/HNRNPC/BCOR/PRMT6/ASF1  
MD8/ABL1/PSMA1/SFRP2/FOXF2/PSMB5/PSMA4/PSMD9/AP2A2/PSMC3/RHOA/IFT20/CLTC/AP2B1/  
LBP/CCL3/S100A7/CXCL17/AKIRIN1/THBS1/ADAM17/VEGFA/RHOA/LGMN/TNFRSF14/KITLG/CCL1  
MD8/ABL1/PSMA1/SFRP2/FOXF2/PSMB5/PSMA4/PSMD9/AP2A2/PSMC3/RHOA/IFT20/CLTC/AP2B1/  
WRAP53/UBQLN4/SFR1/NBN/MAGEF1  
KIF20B/SYNE4/PARD3/RHOA/DOCK2/CCL19/HTT/FRMD4A/KIF26B/ARFGEF1/PKD1/ACTR1A/LLGL2  
HMP1A/CABIN1/HELLS/CENPN/RBBP7/SRPK1/CENPQ/HAT1/MIS18A/NCAPD3/DAXX/RNF8/SART3/A  
/UBQLN4/SFR1/NBN/MAGEF1  
PS27A/VEGFA/HSF4/HSPA5/EGLN2/UBA52/PSMC3  
RPL37/RPL27A/RPL36/UBA52/ETF1/RPL19/RPS11/EIF3E/RPL13A/RPL37A/RPLP1/RPL32/RPL3C  
F4/HSPA5/EGLN2/UBA52/PSMC3

RCAL1/ERCC3/DHX30/DDB1/CHD7/ANXA1/HNRNPA2B1/ERCC2/RAD54B/HELB/XRCC5/TP53/DDX1/A  
ATAD5/THOC1/INPP5D/PTPRC/IKZF3/CASP3/CD22/SUPT6H/CD19/VAV3/PPP2R3C/SLA2/NOD2/TN

SRSF2/CASC3/FIP1L1/RBM8A/MAGOH/SMG7/POLDIP3/THOC7/AAAS/THOC3/HNRNPA2B1/SUPT6H/  
AP1A/MAP7D3/EML2/MECP2/CENPJ/CDK5R1  
SRSF2/CASC3/FIP1L1/RBM8A/MAGOH/SMG7/POLDIP3/THOC7/AAAS/THOC3/HNRNPA2B1/SUPT6H/  
UBA52/RPL19/RPS11/RPL13A/RPL37A/RPLP1/PMM2/RPL32/RPL30/RPS9/RPS14/RPS27/RPL29/S  
FRP2/PSMB5/PSMA4/PSMD9/AP2A2/PSMC3/RHOA/CLTC/AP2B1/PSMC5/AP2A1  
PSMC5/CLEC4E/PSMB1/MAP3K7/PSMB6/FFAR2/ICAM2/PSMA3/RELA/PSMB7/SKP1/CLEC4A  
UV39H2/CENPQ/HAT1/MIS18A/DAXX/SART3/ANP32B/SMARCA5/POLE3/IPO4/HMGA2/PARP10/GRWD  
NP32B/SMARCA5/DMAPI/POLE3/IPO4/SRCAP/GRWD1

HUS1/TERF1/E2F7/KCTD13/ZMPSTE24/LIG3/PPP2CA/SMC1A/TP53/WIZ  
RG1/MZT1/VCP/CHEK2/CCSAP/DCTN1/HNRNPU/RAB11A/MECP2/RHOA/CLTC

RPL19/RPS11/RPL13A/RPL37A/RPLP1/PMM2/RPL32/RPL30/RPS9/RPS14/RPS27/RPL29/SRP68/T



MB5/PSMA4/PSMD9/AP2A2/PSMC3/RHOA/CLTC/AP2B1/PSMC5/AP2A1  
P1/DAB2IP/HMGA2  
IF2A/CAPZB/CTSD/AP1B1/SEC13/HLA-DOA/FCGR2B/DNM2/THBS1/DCTN1/CANX/AP2A2/DYNC1I2/

/HAUS5/RAB11A/RHOA/NEK6

IF2A/CAPZB/CTSD/AP1B1/SEC13/HLA-DOA/FCGR2B/DNM2/DCTN1/CANX/AP2A2/DYNC1I2/KIF22/  
RPLP1/RPL32/RPL30/RPS9/RPS14/RPS27/RPL29/SRP68/TRAM1/RPL13/SSR1/RPL4/RPL41/RPL

SD/AP1B1/SEC13/HLA-DOA/FCGR2B/DNM2/DCTN1/CANX/AP2A2/DYNC1I2/KIF22/CLTC/AP1S1/AF  
M1/IMMP1L/TIMM9/TIMM22/USP36/PAM16/HTRA2/ARIH2/UBL5/BAP1  
E19/UIMC1/GPR132/PSMC3

/EIF2D/YTHDF2/METTLL3/RPL41/RPL9/RPL24/UNK/RPL11/EIF3F/TMA7/RPL10A/EIF4G1/RPS28/  
AP2/PSMC5/PDIA3/PSMB1/PSMB6/PSMA3/HLA-C/VAMP3/CD207/PSMB7/HLA-E/CLEC4A/ACE/IKBB  
1/RPL32/RPL30/RPS9/RPS14/RPS27/RPL29/SRP68/TRAM1/RPL13/RPL4/RPL41/RPL9/RPS6/RPL

J/CC2D2A/YWHAG/B9D1/NPHP4/ACTR1A/OFD1/TMEM67/CEP72/C2CD3/CNTRL/CEP97/RAB3IP/NPH

N1/AFAP1L2/TSG101/HIP1/SOCS5/SNX6/FASLG  
4/PAF1/ZNF16

/FBXL7/HMGA2/VPS4A/PSMB1/PSMB6/PSMA3/HUS1/PSMB7/SKP1

PC5/CDC27/ANAPC4/PSMB1/PSMB6/CDC23/PSMA3/BUB3/ANAPC15/PSMB7

NCKAP1/PLCG1  
O1C/NCKAP1/PLCG1

RP10/GRWD1

MB6/PSMA3/HLA-C/VAMP3/CD207/PSMB7/HLA-E/CLEC4A

T3/ZNF622/RPL12

-C/VAMP3/CD207/PSMB7/HLA-E



PR35/RAB15/RAB25/RIT1/RFXANK/DOK3/GNA12/ADGRG1/RASGEF1A/RAP2B/RHOF/RAB3B/F2RL1/AP8L/IL1B/MTA2/CDK5/KDM5B/PHB/MIER2/TAF9/SFPQ/SIRT7/NAP1L2/KDM5C/SET/SMARCB1/SMANKRD27/THY1/ARHGAP9/CORO1C/GPSM1/F2RL1/ARHGEF19/CCL13/TBC1D1/RIN1/ARHGAP39/GDI/ADORA1/PRNP/ADAM9/MVP/HRAS/SYK/STK39/NUP62/IL18/EZH2/CDC25A/CDK4/DLG3/CSF1R/CCL1/HES4/EZH2/NME2/TWF2/ASAP1/ASPM/COL3A1/ANKRD1/ESRP1/TRPV2/GRN/CRMP1/CFL1/BHLH/PTK7/EFNA5/SF3A2/IL34/RGS14/HIF1A/FZD1/PAK1/CRABP2/ANKRD27/NRCAM/XRCC2/BIN1/HKQA/RELB/SLAMF8/IGLL5/HLA-DRB1/PRNP/HRAS/SYK/HLA-DQA1/HCK/UNC13D/IL18/PAG1/S100A1/TNFAIP8L3/TRAF2/CCL5/MAPKAPK2/CXCR4/MIF/CD300A/IQGAP1/CARD10/EFNA5/DGKZ/CHTF11/MT3/CHST10/AATF/EXTL3/B4GALT7/MUC3A/KRTCAP2/RPN2/B4GALT2/XYL2/UGDH/POMT2/FUT2/HCLS1/AXIN1/PKN3/CDK5/TXN/SPOCK2/GSK3A/INPP5J/BGN/PARP1/STK32C/SMYD3/PRKD2/ARIC14/NPLOC4/PSMB2/IRF7/PSME3/TNIP2/LAG3/FLOT1/SMPDL3B/ADAM8/NONO/ULBP2/NLRC5/PLSD2L2/MAPK3/PYG02/SLPI/ACD/UBASH3B/GPSM1/HSP90AB1/CSNK1E/DDX11/MARK2/PPP1CA/LEF1AG1/CBFB/ITGA2/GBA/CAPNS1/PDGFA/FA2H/TGFB2/FGFR2/CYP26B1/EVPL/VDR/GORAB/APCDD1/SMPDL3B/NONO/CD209/LYN/CARD11/MUC3A/PSMB4/CTSS/PSMB8/PSMB10/PSMA5/CD300LF/NRASCL3/CXCL9/NLRC5/PLSCR1/PMAIP1/RNASE2/IL1B/LAMTOR5/IL2RA/APOBEC3G/RNF26/FGR/CCL4ADM/VIL1/AP2M1/RAB10/TNIF3/STAC3/ACSL3/PRKCI/STX4/RACK1/MYO5A/EPB41L3/PACS2/CLIF1/ILF3/ISG20/TFAP4/POLR2L/APOBEC3D/POLR2K/TNIP1/TRIM25/SUPT5H/CCL3/SRPK1/NOTCH1PSF6/PTPN23/STX18/BAG3/IL4R/SYT1/DNM1L/PDCD5/KHDRBS1/CEMIP/EMD/MFF/PDCD10/VAMP81A/PSMD1/PSMA7/PSMB3/PSMD4/DNM1L/PSMD3/RBX1/CARD16/PSMD7/CBL/TBL2/SUV39H2/PSMD8MD11/ERO1A/PSMD1/PSMA7/PSMB3/PSMD4/DNM1L/PSMD3/RBX1/CARD16/PSMD7/CBL/TMEM199/TER1/TUBB2B/USP14/C5AR1/PADI2/PRKD2/SEMA4B/CALR/SEMA4D/XCL2/CMKLR1/SWAP70/SEMA4F/

D7/DNM2/TCTEX1D2/ODF2L/VDAC3/MARK4/DEF8/CENPJ/SRF/IFT20/FNBP1L/DPYSL3/EPS8L1/EF

IB1/VPS4A/ADD1

/TSG101/HIP1/SOCS5/SNX6/FASLG

/HDAC1/PLCB3/CSNK1E/LZTS2/FAM53B/MARK2/PSMB2/ZNF703/TMEM237/PPP1CA/LEF1/SFRP5/FBCAP31/UBE2J2/FBXO5/CSNK1D/ANAPC7/CDK2/KIF14/SPSB1/SNF8/AXIN1/ADRM1/CCDC22/MYLIHBD1/TCIRG1/RNF34/UBE2I/RNF19B/SHARPIN/HM13/GNA12/ISG15/CHMP4C/PDCL3/DDA1/HSP90/MARK2/PRELID1/PIM2/HIP1R/AIFM2/BID/CEP89/TOMM5/UBE2J2/DYNLT1/NPEPPS/UQCC3/HSPAK1/BAIAP2L1/FCHSD1/RHOF/BIN1/F2RL1/ARPC2/ARHGEF19/ARPC3/LIMCH1/COR01B/HIP1R/PAM/TNFSF9/FLOT2/ZP3/IQGAP1/HLA-DPB1/EBI3/CD276/EFNB1/CD3E/PAK1/SASH3/ADGRG1/THY1/PKN3/CDK5/TXN/GSK3A/INPP5J/STK32C/SMYD3/PRKD2/ARRB2/MTCP1/PRKCI/GRK2/APP/DMPK/CARD11/MUC3A/PSMB4/CTSS/PSMB8/PSMB10/PSMA5/CD300LF/NRAS/PSMD13/PSMC4/MUC5B/UBE2A/CARD11/CBFB/PIAS3/IL2RA/NFAM1/PTPN6/CD27/CCR1/IL12RB1/CYP26B1/IL15/DROSHA/KAT2L2RA/NCAPH2/LCK/CD27/IL12RB1/CYP26B1/IL15/DROSHA/KAT2A/IL4R/PNP/CD8A/LILRB4/AP31/MRPL10/MRPL52/CKAP2/NSF/CKAP5/MRPL48/DAP3/MRPS7/MRPL53/GSPT2/STMN2/MRPS17/MRFD/ACVR1B/CASP8/PDCD2/HOXA5/SMAP1/TMEM64/NKAP/RHOA/AP3B1/RUNX3/ZMIZ1/KITLG/CCL19/8/VCP/PSMA1/SFRP2/PSMB5/PSMA4/PSMD9/VPS35/SFRP4/SULF2/UBR5/PSMC3/GSKIP/PSMC5/REMTMTHFR/VEGFA/KIF20B/TWIST1/CC2D2A/STK3/GLMN/SIX1/8/PDCD2/PPM1F/NDUFA13/RHOA/ANP32B/LGMN

ARK4/HAUS5/TRIM37/CENPJ/SASS6/RBM14  
SPIRE1/DCTN1/MECP2/CDK5R1/RHOA/NIN/ARF1/RHOBTB2/GMFB  
RHOA/ANP32B  
XW5/MARK4/HAUS5/TRIM37/CENPJ/SASS6/RBM14  
/DHX9/TLR7/POLR2E/ZCCHC3/PIN1/TLR8/TRIM32/POLR3F/RELA/POLR1C/POLR3A/TRIM15/PTPRNB3/CDK5R1/YWHAG/AP2B1/EPHA2/TFDP1/EPHB2/CIB1  
/DHX9/TLR7/POLR2E/ZCCHC3/PIN1/TLR8/TRIM32/POLR3F/RELA/POLR1C/POLR3A/TRIM15/PTPR  
/MFN1/TMEM102/CALM3/NAIF1/CNP/THEM4/TIMM9/TIMM22/NMT1

B/POLR2G/FTSJ1/BIN1/ECE2/RBM3/EIF2S2/MRPS12/RPS2/PABPC1/TICRR/GGCT/PSENEN/MRPL4  
RNF19B/SHARPIN/ISG15/BRCA1/PCNA/MED10/TRIM59/SOCS1/RPS2/HSP90AB1/TSPAN17/PSMB2/  
BCAP31/UBE2J2/FBXO5/CSNK1D/ANAPC7/CDK2/KIF14/SPSB1/SNF8/AXIN1/ADRM1/CCDC22/MYLI  
15/CHMP4C/PDCL3/DDA1/HSP90AB1/NPLOC4/CSNK1E/MAN1B1/PSMB2/PSME3/HSPBP1/BCAP31/UE  
/HDAC1/PLCB3/CSNK1E/LZTS2/FAM53B/MARK2/PSMB2/ZNF703/TMEM237/PPP1CA/LEF1/SFRP5/F  
AL3ST4/PLCB1/NUP62/PFKFB3/GPC1/TMSB4X/ELOVL1/NUDT14/TUSC3/NME2/DPM2/MUC1/TYMP/G  
LCB1/STK39/NUP62/IL18/EZH2/EEF1E1/S100A8/MAPK8IP2/CSF1R/UNC5B/HCST/COL3A1/ANKRE  
3/PPARD/B3GALNT1/ST3GAL4/SOAT1/MT3/CHST10/AATF/EXTL3/B4GALT7/MUC3A/KRTCAP2/RPN2  
A/PLEKHM2/TMED9/NPLOC4/NUP93/MYRF/SNX10/FLOT1/CSNK1D/SNF8/PLSCR1/CAMSAP2/REEP2/  
C1/PPIA/NUP188/ZC3H12A/DYNLT1/LAMP3/CCL2/RPSA/TRIM31/KPNB1/SNF8/PLSCR1/CD209/IT  
A/BCL3/LAG3/NCKAP1L/JAG2/ADAM8/PRR7/PIK3CD/KDELR1/FANCA/CARD11/CBFB/IL2RA/NCAPH  
3/UNC93B1/PRKDC/PSMD2/MAPK3/NUPR1/SERPINE1/PAK1/MNDA/IRF1/IRF3/F2RL1/RAB7B/LRRC  
D/DNAAF5/MKKS/TBC1D30/DCTN2/B9D2/POC1A/HAUS8/PLK4/MAP4/IFT80/GORAB/ODF2/PTPN23/  
DAM8/NONO/CCL2/ATF4/KIF14/CLN3/ATN1/GBA/CDK5/WFS1/TGFB2/CIT/PARP1/SET/NSMF/NES/  
D2B/SLC9A1/EFNA5/PAK1/BAIAP2L1/FCHSD1/RHOF/BIN1/F2RL1/ARPC2/ARHGEF19/ARPC3/LIMC  
D/DNAAF5/MKKS/TBC1D30/DCTN2/B9D2/POC1A/HAUS8/PLK4/MAP4/IFT80/GORAB/ODF2/PTPN23/

RA8/IL1B/CDK5/DNER/FA2H/TGFB2/ASCL2/PPP1CC/CDKN2C/C5AR1/PRKCI/APP/GPR157/VIM/CS

SF11A/PSMB2/KRT18/ZC3H12A/PSME3/CPNE1/CCL2/KRT8/ASAHI/PSMB4/GBA/PIAS3/PSMB8/TNF  
/SLC35B2/CARD11/GPRC5B/CCDC22/UNC5CL/IL1B/S100A13/TMEM101/CASP1/MAP3K14/SLC44A2  
CI/TGFB3/APP/AXL/FADD/PIGT/AKT1S1/NAE1/TFAP2A/CCL3/BTG2/NFATC4/GABRB3/HSPA5/BCL  
CL11/CCR5/CARD16/AXL/VIM/LBP/CCL3/CDK19/ABL1/FCGR2B/TNFAIP3  
/IL1B/WFS1/CTTN/TAF9/MAZ/PSMD10/GPX1/FAIM/ARRB2/PCGF2/MAPK7/FADD/PTTG1IP/WNT4/F

DOCK8/NTM/CASP3/ATP8B3/PRF1/MEGF8/CELSR3/TUB  
/IFITM3/KPNA6/SNX3/CCL8/CAV2/HMGA2/PARP10/MORC2/ZC3HAV1/LARP1/VPS4A/NECTIN2/SRF  
C2/INTS7/POLR2D/TOE1/SSU72/THOC1/DHX38/EXOSC2/PABPC1L/PABPN1/SRSF1/SRSF2/PAF1/C  
A/AP3B1/RUNX3/ZMIZ1/CCL19/PIK3R6/ZNF683/PTPRC/METTL3/LOXL3/NFKBID/CLPTM1/SH3RF1  
MEM102/BIK/NAIF1/PLA2G6/THEM4/NMT1/PAM16/FZD9/ATG3  
FCD/GTF2F1/LARP1/VPS4A/CTDP1/SRPK2/DDB1/P4HB/VAPA/TBC1D20/ADAR/IGF2R/POLR2B/CD4  
1  
AM98A/DOCK11/EPS8L2/CARMIL2

/UBE2J2/FBXO5/CSNK1D/ANAPC7/CDK2/KIF14/SPSB1/SNF8/AXIN1/ADRM1/CCDC22/MYLIP/PSME  
/FANCD2/NDRG3/PLCB1/NUP62/CCT5/MAPK8IP2/ASPM/ZNF296/SPAG4/SLC26A6/TNFAIP6/HSF1/  
131/CDK16/RACGAP1/PTAFR/NCAPH/FANCD2/NDRG3/NUP62/MAPK8IP2/ASPM/BSG/ZNF296/SPAG4  
131/CDK16/RACGAP1/PTAFR/NCAPH/FANCD2/NDRG3/NUP62/MAPK8IP2/ASPM/BSG/ZNF296/SPAG4  
MAP2K2/PAK1/CAPN10/STX1A/SLC51B/DYNC1H1/GDI1/ZC3H12A/NCBP2/BCAP31/UBE2J2/FERMT1



FR1/DVL3/DUSP2/ADAM8/SHC1/LYN/WNT7B/BIRC7/DUSP4/IL1B/GBA/PDGFA/MLKL/MAPK11/PTPN  
3/CSNK1D/FZD2/AXIN1/NLE1/MITF/WNT7B/GPRC5B/PSMB4/PSMB8/PSMB10/PSMA5/PSMD13/PSMC

1/MIF/MTCL1/CD2/HIF1A/MAPK3/OAZ1/DKC1/PAK1/CAPN10/TNFRSF4/SLC51B/CCT2/CD58/IRF3  
CLN3/GBA/CDK5/WFS1/TGFB2/PARP1/SET/NSMF/NES/C5AR1/MSH2/ARRB2/PRKCI/TGFB3/PPP5C/  
RC5B/PSMB4/PSMB8/PSMB10/PSMA5/PSMD13/PSMC4/GSK3A/FGFR2/DVL2/RNF220/PSMD10/PSMD1

/GPRC5B/CCDC22/UNC5CL/IL1B/S100A13/TMEM101/CASP1/MAP3K14/SLC44A2/LTBR/PPP5C/CAR  
SYT1/APP/GAL/SYT3/SEMA4F/SEMA5B/SEMA3C/SEMA3E/MAPT/MED12/RARG/ABL1/VCL/RASAL1/S  
P2A/CCL3/BTG2/NFATC4/GABRB3/BCL2L1/EGLN2/ZPR1/MECP2/CDK5R1/RHOA/STXBP1/SIX1/LGM  
DR/UBE2A/SYDE1/MAFF/AGO2/CALR/TGFB3

P3/PML/THOC6/GRB2/VPS18/GRK2/CPSF4/CCR5/AXL/CBL/CLEC5A/TNIP1/TRIM25/VAMP8/BAD/T  
/WASF1/GPX1/RPS3/GRB2/FHOD1/CDC42/TGFB3/APP/SWAP70/CDC42EP2/KATNB1/GMFG/ABI2/WC  
L/PELI1/MTBP/RPL23/GNL3/TNIP1/PTTG1IP/PDCD6/UBXN1/ABL1/VCP/TNFAIP3/RPS7/FOXF2/E  
NM2/TCTEX1D2/ODF2L/VDAC3/MARK4/DEF8/CENPJ/SRF/IFT20/FNBP1L/DPYSL3/EP8L1/EPHA2/  
P2/TRAF4/TWIST1/EIF3E/STK3/DHX9/DPH3/CLIC2/EGF/CAV1/HMGA2/CALM3/PKD1/EDF1/BMP2/  
/CAV2/VPS4A/NECTIN2/VPS16/C2CD5/SPACA6/RAB8B/VPS8/MX1/VAPA/TSNARE1/VAMP3/KIF5B/  
/PIK3CB/ACIN1/RPS6/CASP3/ADAR/SMAD5/NCSTN/MFAS1/RPS24/HOXB6/ANKRD54/PDE4B/DMTN  
AVS/TLR2

/HSPA5/CANX/HSPA14/PPP2R5B/GFPT1/TLN1/DAXX/GOSR2/TPP1/BHLHA15/HSP90B1/HSPA13/DA

ALNAC2/TRAK2/C1GALT1C1/B3GNT4/GALNT3/POMT1/OGT/DPM1

OCS1/EPHB6/TGFA/RELN/DYRK2/NCAPG2/EPHB3/FGFR1/FGFR3/SHC1/HDAC2/HCLS1/TESK1/LYN/  
OCS1/EPHB6/TGFA/RELN/DYRK2/NCAPG2/EPHB3/FGFR1/FGFR3/SHC1/HDAC2/HCLS1/TESK1/LYN/  
CCL13/TNFRSF11A/PSMB2/KRT18/ZC3H12A/PSME3/CPNE1/CCL2/KRT8/ASAH1/PSMB4/GBA/PIAS3  
1/PF4V1/SBN02/CD6/CXCL11/CCR5/CARD16/AXL/BTK/CLEC7A/VIM/LBP/CCL3/CDK19/ABL1/FCG  
CR5/CARD16/AXL/VIM/LBP/CCL3/CDK19/ABL1/TNFAIP3  
10/EXOSC7/WARS2/SEPHS1/TRMT12/TP53RK/DARS2/CTU1/TSEN34/TPRKB/TYW3/YARS2/PARS2/H  
F3E/RPUSD3/NSUN4/RHOA/POLR2D/DHX9/COA3/EIF6/RPS9/LARP1/YTHDF2/CDK5RAP1/YTHDF1/M  
R2

/MVB12B/NEURL1/PDE6G/DGKD/RNF126/RNF115/RAB7A/CHMP6/EPN1/RASSF2/AFAP1L2/TSG101/

SETDB1/AGO1/POLR2B/FXR1/ASF1A/EIF4G1/ELAVL1/ZMPSTE24/NUP214/MYCN/MAEL/TP53

/RPRD1A/POLDIP3/THOC7/THOC3/U2AF1L4/SRSF3/PNPT1/GRSF1/RNF40/SRSF7/PAPOLA/LEO1/T

2/PRKCD/ROBO1/ADORA1/PRNP/ADAM9/HRAS/SYK/PLCB1/STK39/PFKFB3/PGF/IL18/EZH2/MAPK8  
CL13/TBC1D1/RIN1/ARHGAP39/GDI1/ARFGAP1/TBC1D10B/DVL3/NCKAP1L/ARHGAP1/CCL2/RAP1G  
NMT1/POLR2L/NUP155/DROSHA/KAT2A/AGO2/BEND3/MTF2/NUP107/NCOR2/POLR2K/HELLS/PCGF2  
'5B/DPAGT1/IL15/A4GALT/STT3A/GALNT6/FUT2/FUT6/MUC20/TMEM258/MVD/SLC35C1/ST3GAL5/  
'5B/DPAGT1/IL15/A4GALT/STT3A/GALNT6/FUT2/FUT6/MUC20/TMEM258/MVD/SLC35C1/ST3GAL5/  
'/PDCD6/UBXN1/ABL1/TNFAIP3/RPS7/FOXF2/BAG2/TBC1D7/BCL10/HSP90AA1/RPL5/MASTL/HSPA

EM98/ERCC1/HLA-F/RNF8/CCL19/NOTCH2/DOCK10/MSH6/ITGAL/ATP7A/TP53BP1/ATAD5/THOC1/

HX9/CCL19/TMEM106A/PTPRC/NFKBIL1/TRIM27/SYT11/IFNG/CCR2/AKAP8/HLA-E/NOD1/CLEC4A  
RHBDD3/GLMN/INHA/TNFRSF14/IDO1/RUNX3/XCL1/THOC1/INPP5D/DUSP22

HMGA2/TFIP11/SPIRE2/FIGNL1/EYA3/TMEM161A/HELB/ACTR2/FAM168A/SETMAR/WDR70/TRIP12

SF1R/NCF4/SH2D2A/ESRP1/CREB3L1/NCF1/RHOQ/DOK2/ATP6V0B/IGFBP3/AREG/ATP6V0D2/JAK3  
NFAIP6/HSF1/KIF18A/WIPF3/LIMK2/HMGB2/YBX3/EIF5A2/BAX/NROB1/SNRPA1/FANCG/ZP3/RUV  
NBP1/GPD1L/PPP1R37/P3H1/BDKRB1/BAX/FKBP1A/CD300A/PRKDC/MAD2L2/RGS14/PPP2R1A/ISG  
A/LEF1/SFRP5/PSME3/SLC9A3R1/DVL3/FERMT1/PLEKHA4/DAPK3/CSNK1D/AXIN1/NLE1/GPRC5B/  
1/CHMP3/WDR45B/MAP1LC3B/VPS28/ATP6V0C/MVB12A/ATP6V0E1/BAG3/VPS25/PGAM5/IKBKG/PI

B/PDGFA/PTPN6/SAMSN1/SOCS3/DVL2/IL15/CADM4/LRP8/ARRB2/SEMA4D/VPS25/APP/ADRA2A/C

/DNAJB2/PLXND1/NES/LOX/RUVBL2/ARRB2/APP/CARD16/RALB/STPG1/PTPRF/CARD18/MFNG/LFN

/CCDC93/AP3D1/TBC1D10C/UBE20/RASSF9/TMEM87B/GGA1/VCP/DENND5A/DCTN1/VPS35/RPS27A  
/SLC11A1/RAB20/HLA-DRB5/CD47/CCL4/WAS/CASP1/PML/SOCS3/IL12RB1/CXCL16/HLA-B/XCL2  
/TBL2/ATP6V0D1/HSPD1/HSPA2/VCP/SRPRB/WIP1/HSP90AA1/TATDN2/PTPN2/THBS1/DCTN1/PT  
2/ABL1/SART1/HLA-DOA/TOX/BAD/PTPN2/NKAP/RHOA/INHA/AP3B1/RUNX3/ZMIZ1/CCL19/PIK3R  
1/KITLG/CCL19/PIK3R6/HAX1/INPP5D/PTPRC/ACIN1/NFKBID/CD4/IFNG/ANXA1/PPP2R3C/GNAS

TC/EREG/EGF/DAB2IP/STUB1/SNX5/PLCG1/STAM/MVB12B/NEURL1/PDE6G/DGKD/RNF126/RNF115

K2/USP36/DYRK3/KDM3A/PRKCB/CNEP1R1/ZMPSTE24/CHMP6/NOLC1/SERBP1/PPP2CA/TARDBP/TE  
2A2/VRK2/CSNK1G1/ULK1/DMTN/DYRK3/EIF4G1/PRKCB/PPP2R5D/WNK1/MAP3K12

/PSMB1/MAP3K7/PSMB6/PSMA3/RELA/PSMB7/SKP1/NOD1/NOD2/IKBKB

A/PSME2/MYB/PSMD6/GATA3/PSMC2/PSMA6/YAP1/TP73/HSPA9/PSMD5

/ROBO1/ADORA1/PRNP/ADAM9/HRAS/SYK/PLCB1/STK39/PGF/IL18/EZH2/MAPK8IP2/DLG3/CSF1R  
5/MAPK3/MAP2K2/CENPE/PAK1/PEA15/FPR1/SOCS1/CKS1B/HSP90AB1/TGFA/TNFRSF11A/RELN/M

ARRB2/USP22/KAT2A/ATXN7L3/PSMD4/PSMD3/PSMD7/IKBKG/BABAM1/TNIP1/INO80C/UBXN1/PSM  
RHOT2/SLC25A5/MFF/BAD/VPS35/CASP8/SH3GLB1/OPTN/BNIP3L/SREBF1/BCL2L1/CDC37/STOML  
TYXL1/ODF2L/VDAC3/SH3GLB1/HNRNPU/MARK4/TRIM37/CENPJ/RBM14/RHOA/VPS11/IFT20/BECN

/PWP1/PSMB1/PSMB6/PSMA3/PSMB7/KDM3A/LTBP3/SETD1A/PSMD12/GATA4/WNT3A/STAT3/KMT2A

00A10/CARMIL1/TIMP2/TCF3/P3H1/CXCR4/IQGAP1/PTK7/EFNA5/SF3A2/IL34/RGS14/HIF1A/FZ  
/LINGO1/WASF2/BAX/CXCR4/SEMA4A/NDN/MAP2/DOK1/BRSK1/IQGAP1/B4GALT5/EFNA5/MAPK3/E  
EMA4A/MAP2/BRSK1/IQGAP1/PTK7/EFNA5/SF3A2/FZD1/PAK1/CRABP2/ANKRD27/NRCAM/THY1/RT  
/LINGO1/WASF2/CXCR4/SEMA4A/NDN/MAP2/DOK1/BRSK1/IQGAP1/B4GALT5/EFNA5/MAPK3/EFNB1  
/PAG1/S100A8/HLA-DRA/MUC1/EZR/HLA-DQB1/HMGB3/VTCN1/GBP5/CARD9/PSMB9/TFRC/HLA-DF  
/EIF4A3/ILF3/GRB7/ZNF706/RPS3/SAMD4B/NCL/EIF3H/AGO2/CALR/APP/PPP1R15A/UQCC2/RPS  
/GRN/RPS6KA1/HSF1/CARD9/PSMB9/TRAF2/PSMD14/TIMP2/BAX/BEX3/UBE2Z/TNFAIP8/MAPK3/S  
ERPINE1/IL27RA/SLPI/ISG15/LYPD8/SPON2/IRF1/IRF3/F2RL1/STAT1/NPLOC4/BATF2/POLR3K  
K1/CRABP2/NRCAM/SMARCA4/PPP1R9B/OSGIN2/GDI1/PPARD/LEF1/MT3/PAK4/EXTL3/KIF14/BCA

SP22/KAT2A/ATXN7L3/PSMD4/PSMD3/PSMD7/IKBKG/BABAM1/TNIP1/INO80C/UBXN1/PSMD8/TAF1  
OMT2/FUT3/MUC5B/DPAGT1/IL15/A4GALT/STT3A/GALNT6/FUT2/FUT6/MUC20/TMEM258/MVD/SLC

STK25/VRK1/CSNK1G2/IGF1R/ABL1/STK24/PIM3/CALM2/CSK/CHEK2/MAPKAPK3/ACVR1B/PTK2/T  
19/ROMO1/LBP/S100A7/GNLY/TUSC2/ADAM17/ADAMTS5/MAVS/DMBT1/OPTN/PLA2G1B/TLR2/ANXA

3/MILR1/TWSG1/PTPN2/IL20RB/HLA-F/RHBDD3/GLMN/INHA/TNFRSF14/IDO1/RUNX3/XCL1/IL13  
P18/CAV1/DAB2IP/RPTOR/CIB1/CDK5RAP1

ARE1/VAMP3/KIF5B/ANXA1/VAMP1/NKD2/RAB7A/VAV3/MUL1

PSMA6/YAP1/TP73/HSPA9/PSMD5

ITGB2/SNAP25/KCNJ11/PRKCD/TRIP10/SLC7A1/ITGAV/SLC7A11/SCAMP5/IL15RA/IGLL5/SLC6A4A/MAP2/MSN/BRSK1/EFNA5/PAK1/CRABP2/GNA12/ANKRD27/NRCAM/THY1/RHOF/CORO1C/ARPC2/ARD10/EFNA5/DGKZ/MAPK3/MAP2K2/CENPE/PAK1/PEA15/FPR1/SOCS1/CKS1B/HSP90AB1/TGFA/T  
C2/SULT2B1/KRT8/ASAH1/JAG1/CBFB/CAPNS1/PDGFA/FA2H/WAS/TGFB2/AGPAT2/FGFR2/CYP26E

WDR1/EPB41L3/FMNL3/SEMA3E/FGD1/CCL3/PALM/ARAP1/PLXNC1/PTK2/VEGFA/HEXB  
1A/ARL8B/AP3B1/IFT20/RAB27B/TNPO1/IFT22/SNAPIN/SSX2IP/UXT/HTT/ACTR1A/RAB1A/KIF3  
1A/ARL8B/AP3B1/IFT20/RAB27B/TNPO1/IFT22/SNAPIN/SSX2IP/UXT/HTT/ACTR1A/RAB1A/KIF3  
2A2/VRK2/CSNK1G1/ULK1/DMTN/DYRK3/EIF4G1/PRKCB/PPP2R5D/WNK1/MAP3K12/GALNT3  
8/UCN/SYT11/HYAL2/NOD1/TLR1/NOD2/AFAP1L2/LILRB2/TICAM1/WNT5A/C5AR2/ARRB1/SLAMF1

RAL1/AURKAIP1/MRPL20/MRPL24/MRPS16/MRPL55/CHCHD1/MRPS2/MRPL21/MRPS26/MRPS11/MRF

IL12A/ZBTB7B/SOCS5/MYB/ZAP70/MALT1/HLA-G/GATA3/FLT3LG/IL1RL2



LL5/NME1/ADORA1/HRAS/RAB31/APLP1/SYK/MTMR2/HCK/UNC13D/LRP10/CD151/NCF4/EZR/SCRI  
UVBL1/PYGO2/MAST2/SLC4A2/PHC2/TSPAN8/TTL1/DYNLL1/DPCD/FSTL3/NDC1/BCAP31/JAG2/R  
A/NCBP2/BCL3/EIF3D/CNOT9/DAPK3/ATF4/ITGA2/EIF2S3/GSK3A/MRPL13/GCN1/CDC123/EIF4A  
P1R15A/TMUB2/UFC1/SGTB/RACK1/PDIA6/CXXC1/ERP27/TBL2/TRIM25/ATP6VOD1/EIF2B5/UBXN  
CKAP1L/NLRC5/SLC11A1/RAC1/GBA/TGFB2/PTPN6/PML/IL1R2/ANXA4/ASB1/ARRB2/TGFB3/CMKL

IDD1/TTYH1/CFTR/SFRP4/SLC4A7/VDAC3/VDAC2/GABRB3  
/INPP5D/TMEM106A/TLR8/UCN/SYT11/HYAL2/NOD1/TLR1/NOD2/AFAP1L2/LILRB2/TICAM1/WNT5

PS9/LARP1/YTHDF2/CDK5RAP1/YTHDF1/METTL3/UCN/POLDIP3/HNRNPD/PYM1

DPYSL2/WNT5A/OLFM1/WNT3A

B1/PDE5A/CD80/FGL2/LILRB2/ZBTB7B/PDCD1LG2/SOCS5/CD274

4/ADORA1/ADAM9/NBL1/MVP/HRAS/SHKBP1/SYK/PLCB1/ATP6V1F/NUP62/HCK/GPC1/CD109/PGF/  
G01/WASF2/CXCR4/SEMA4A/NDN/MAP2/DOK1/BRSK1/IQGAP1/B4GALT5/EFNA5/MAPK3/EFNB1/MAF

YG02/MAST2/SLC4A2/PHC2/TSPAN8/TTL1/DYNLL1/DPCD/FSTL3/NDC1/BCAP31/JAG2/RSPH1/SC  
9/PSMB9/TRAFF2/PSMD14/TIMP2/BAX/BEX3/UBE2Z/TNFAIP8/SERPINE1/RNF34/SLPI/PERP/BCL2

3E/CBFA2T2/STMN2/NFATC4/TBC1D7/DENND5A/DNM2/PTK2/ODF2L/RAB29/IFRD1/CDK5R1/RHOA/  
RB5/CD47/CCL4/WAS/CASP1/PML/SOCS3/IL12RB1/HLA-B/XCL2/CDC42EP2/STX4/VIM/TRIM25/C  
RPV6/CACNA1D/STXBP1/ADORA2B/SNAPIN/ARF1/IL13RA2/CD84/CALM3/CNR1/ATP2A2/CASK/BCR

KRD54/DMTN/DYRK3

2/MYB/PSMD6/GATA3/PSMC2/PSMA6/NUDT21/YAP1/TP73/HSPA9/PSMD5  
DC2/LAMC1/TRPV2/FZD7/SCRIB/CTNND2/CRMP1/CFL1/MICALL2/S100A10/DOK2/DTNBP1/LINGO1  
MT5A/HCF1/EHMT2/IL1B/PIAS3/CBX4/LOXL2/TAF9/NUP85/NUP43/NAP1L2/SET/RNF113A/SMAR

4/GSDMD/IL4R/PNP/TLR5/HK1/CARD16/CLEC5A/CARD18/BTN2A2/CCL3/ABL1/FCGR2B/TNFAIP3/  
/ILF3/ISG20/EXOSC5/TRAFF3/APOBEC3D/GPATCH3/FADD/TRIM25/POLR3D/POLR3H/POLR3C/TNFA  
PEL2/GZMB/TIMM44/PDCD5/TOMM40L/STPG1/TIMM50/ROMO1/LETM1/HSPD1/RHOT2/SLC25A5/TIM  
D2/PSMC3/SRF/PSMC5/KITLG/OSM/LDB1/PTPRC/YTHDF2/METTL3/PSMB1/PRRC2C/PSMB6/ADAR/F

HOA/CD38/GAK/ADCY6/DPYSL3/SNAPIN/EPHB2/CIB1/RYK/FSTL4/LPAR1/SEMA3F/TRIM46/SEMA6

TNFAIP3/SFRP4/RNF2/PIAS4/TRIM21/MAP3K10/TRIM37/TWIST1/ADGRG3/SIGIRR/FAF1/XCL1/I

HS2ST1/B3GNT8

MF8/IGLL5/ACP5/ADAM9/HRAS/SYK/HCK/CCT5/UNC13D/IL18/EXOSC4/MX2/CDK4/S100A8/LYZ/A  
A4A/NDN/MAP2/DOK1/BRSK1/IQGAP1/B4GALT5/EFNA5/MAPK3/EFNB1/MAP1S/PAK1/CRABP2/ANKR  
MF8/IGLL5/ACP5/ADAM9/HRAS/SYK/HCK/CCT5/UNC13D/IL18/EXOSC4/MX2/CDK4/S100A8/LYZ/A  
PAN17/NUP93/NXT1/FAM53B/NUP188/ZC3H12A/CSE1L/BID/CCT4/TOMM5/UBE2J2/RPL17/FERMT1

5/LAMC2/SERPINE1/CD3E/CD63/PRKX/LAMA5/EDA/THY1/ITGB5/CORO1C/ARPC2/LIMCH1/EPHB3/

UBASH3B/SOCS1/IRF1/CTLA4/PLA2G2D/C1QTNF1/ZNF703/ZC3H12A/LAG3/GTPBP4/ARHGDIB/JAG

EML2/TRIM37/ARHGAP28/RBM14/PLEKHH2/MTPN/SPTAN1/CORO2B/GMFB/CAMSAP1/ARFGEF1/CIB1

C/BMF/HGS/NPC1/GPSM1/DYNLL1/FOXK2/MARK2/PIM2/ZC3H12A/MT3/RAB24/TOMM5/ATG101/MLS  
MF8/IGLL5/ACP5/ADAM9/HRAS/SYK/HCK/CCT5/UNC13D/IL18/EXOSC4/MX2/CDK4/S100A8/LYZ/A  
MRPL17/CERS5/SMPD2/NPM1/UPF3B/POLR2G/NSMAF/FTSJ1/DEGS1/RBM3/EIF2S2/MRPS12/RPS2/  
C/BMF/HGS/NPC1/GPSM1/DYNLL1/FOXK2/MARK2/PIM2/ZC3H12A/MT3/RAB24/TOMM5/ATG101/MLS

SEMA4A/ZP3/HLA-DPB1/UNC93B1/SIGLEC10/NFKB2/EBI3/MAD2L2/IL27RA/HLA-DQB2/CD3E/TCI

.7/PSMB6/PSMA3/RELA/PSMB7/SKP1/PIK3R2/VAV3/IKBKB/PPP3CB/PSMD12/NFATC1/MAPK9/TAB1

FNB1/MAP1S/PAK1/CRABP2/NRCAM/THY1/RTN4RL2/PALLD/HSP90AB1/EPHB6/ISL2/RELN/S100B/  
NFRSF4/EDA/SMARCA4/RAB7B/LRRC14/TNFRSF11A/RELN/PRMT2/RPS6KA4/SFRP5/ZC3H12A/FLOT  
RID2/PCGF1/SMCHD1  
L/BYSL/PARP1/BARD1/BAG3/NUP155/CALR/CTDNEP1/DNAJB6/NUP107/LILRB4/RPL23/MSX1/CCT  
ST1R/C5AR1/RPS3/TGFB3/MUC20/ADRA2A/MAP3K6/IKBKG/CSPG4/TRAF7/CXCL17/PDCD10/CSK/M  
EMA3E/MAPT/RARG/ABL1/VCL/RASAL1/DBNL/HSP90AA1/DNM2/LLPH/VEGFA/RAB11A/IFRD1/CDK5

2G6/PARK7/USP36/NMT1/HTRA2/ARIH2/UBL5/MUL1/BAP1

B4X/CSF1R/EZR/ANKRD1/SLC25A6/VTCN1/RAN/RAB11FIP5/ANXA13/CCT6A/MICALL2/RANGAP1/TAC1/ATP6V1E1/GBA/LAMTOR5/CAPNS1/CDK5/LAMTOR1/CTTN/IFI16/GSK3A/OSBPL7/DRAM2/ATP6

PC5/TAF11/GTF2E1/SNAPC1/SP1/METTL16/ICE1/GTF2B/TUT1/INTS3/RPRD2/INTS5/SAGE1/NCE

.-G/GATA3

NPRL3/UBQLN4/PRKAA2/VPS35/SH3GLB1/OPTN/GNAI3/BNIP3L/LZTS1/CDC37/CDK5R1/ATG13/IFEGFA/RAB11A/IFRD1/CDK5R1/METRNL/SRF/RHOA/NIN/IST1/EPHB2/YTHDF1/ADNP/RYK/PLXNB2/F

/COPS5/HSPA5/CANX/HSPA14/PPP2R5B/GFPT1/TLN1/DAXX/ANKZF1/GOSR2/TPP1/SDF2L1/BHLHARALB/MSX1/PTPRF/CARD18/SYMPK/NFATC4/TDG/TMC8/BAG2

2

APK15/TERF1/HNRNPA2B1/XRCC5/TP53/SH2B1/PARN/MEN1

/NUP62/IL18/EZH2/WNK2/MAPK8IP2/DLG3/CSF1R/EZR/MAGED1/FZD7/HSF1/GLIPR2/NCF1/PRMT  
CARD9/PSMB9/HLA-DPA1/VSIG4/CTSK/WIPF3/RBCK1/PSMD14/WASF2/BAX/MAPKAPK2/VAV1/COLE  
AV1/SEMA4A/CCL26/MAP2/SLC12A9/MSN/ARPC4/EFNA5/PAK1/CRABP2/BAIAP2L1/NRCAM/SLC12A  
PP2R1A/IGFBP6/STX1A/EDA/MLLT3/SMARCA4/ARHGEF19/HDAC1/RELN/PLCB3/CSNK1E/LZTS2/P2  
I/ZMYND8/SEMA4D/SYT1/DNM1L/SYT3/KATNB1/STK25/ARHGDIA/SCN1B/MAPT/CBFA2T2/STMN2/R

/MRPL21/MRPS26/MRPS11/MRPL42/MRPL22/MRPL58/MRPL38/MRPS30/MRPS27/MRPS18A/MRPL43/  
EIF6/CNOT3/POLR2E/PRKRA/SND1/SPOUT1/MIR155HG/METTL3/PPARG/MOV10/PPP1R8/ADAR/AA

HGAP28/PLEKHH2/MTPN/SPTAN1/CORO2B/GMFB/CAMSAP1/ARFGEF1/CIB1  
1A/HUWE1/SKP2/PIN1

TTL2A/THADA/DUS1L/THUMP2D/PTCD1/DDX1/METTL2B/AARS2/METTL6/GRSF1/RPP38/THUMP2D/GR  
P1/BHLHA15/HSP90B1/HSPA13/DAB2IP/FKBP14/STUB1/ADD1/SSR1

AP2/IQGAP1/SLC9A1/EFNA5/MAD2L2/PPP2R1A/PAK1/CRABP2/NRCAM/SMARCA4/HSP90AB1/PPP1R

XCL16/PSMD10/CDC42/SEMA4D/SYT1/SYT3/MAPT/RASAL1/SFRP2/GHRHR/BRAT1/DBNL/TBX2/ADA  
A  
/MRPL21/MRPS26/MRPS11/MRPL42/MRPL22/MRPL58/MRPL38/MRPS30/MRPS27/MRPS18A/MRPL43/

P8/RPS27A/TLR2/UBA52/UBE2D2/MAP3K1/LGMN/TLR7/HSP90B1/IRAK2/CAV1/DAB2IP/NFKBIL1/  
9/UIMC1/HSPA5/BCL2L1/INTS7/LZIC/RNF8/DNMT3B/TIGAR/POLE3/ATR/TP53BP1/HMGA2/DCLRE

D10/PSMD11/PSMD1/IL1R2/PSMA7/PSMB3/PRKCI/XCL2/APP/PSMD4/PSMD3/RBX1/PSMD7/IKBKG/

/NUP98/HDAC4

P1R35/PPP1CA/PPME1/DUSP2/NCKAP1L/DUSP4/GBA/CDCA2/LCK/PTPN6/PPP1CC/PPP1R1B/SET/N

5/SCP2/CYP4F12/PHYH/FABP1/ACADL/ACOX2/CYP4F3/PCK2/SLC27A2/EHHADH/HA02/HA01/CYP4

LIN5/SCP2/PPARGC1A/PHYH/CYP4V2/FABP1/ACADL/ACOX2/SLC27A2/EHHADH/HA02/PDK4/HA01

.3C/SEMA3E/RERG/CDHR2/GNG4/SFRP2/SIPA1/ACVR1B/CCDC85B/NPPB/CRLF3/IFRD1/CDK5R1/NL



/TPR/NUP50/STAT3  
/TPR/NUP50/STAT3

LIN5/SCP2/PPARGC1A/PHYH/CYP4V2/FABP1/ACADL/ACOX2/SLC27A2/EHHADH/HAO2/PDK4/HAO1  
LP1/NUDT21/NCBP1/MED18/TAF1A/GTF2H3/WDR33/TAF1C/CPSF2/MNAT1/LSM11/MTERF1

CHORDC1/PTPN6/GSK3A/MIDN/SOCS3/PPP1R1B/SMYD3/CDKN2C/TFAP4/VPS25/SPRY4/GMFG/CBL/

H/ALDH6A1/DA0/FTCD/UROC1/OTC/CD01/AGXT/HPD/TAT

3HAV1/LARP1/SRPK2/IFITM2/DDB1/MX1/VAPA/TBC1D20/ADAR

/NUP62/IL18/EZH2/WNK2/MAPK8IP2/DLG3/CSF1R/EZR/MAGED1/FZD7/HSF1/GLIPR2/NCF1/PRMT

WNT7B/BIRC7/IL1B/PDGFA/MLKL/MAPK11/MAP3K14/TNIF251/DVL2/MST1R/PSMD10/C5AR1/CCND2/R

LDLR/CPNE1/HEYL/CSNK1D/KDM1A/LYN/GPRC5B/ADRA2C/RNF157/PLXND1/NDRG4/NAP1L2/TUBB2

TFAP4/VPS25/SPRY4/GMFG/CBL/AKT1S1/RACK1/ZNF675/RGS3/IGF1R/STK38/NF2/PKIA/ABL1/S

F8/HLA-G

F8/HLA-G

P01/DMAP1/IPO9/NXT2/KPNA6/IPO4/GEMIN2/SNRPD3/TNPO3/EFCAB7/RBM22/DDX20/KPNA4/GEM

1R8/ADAR/AAAS/AGO1/POLR2B/FXR1/EIF4G1/HNRNPA2B1/SMAD2/ELAVL1/ZMPSTE24/NUP214/SM

C2/LIG3/TP53/COPS7A/RAD23A/SLX4/POLD2

BX2/ADAM17/NOTCH1/S1PR3/AAK1/RITA1/MESP1/TSPAN14/RIPPLY2/NOTCH3/NKAP/SLC35C2/ZM

B11A/IFRD1/CDK5R1/SRF/SLC9A6/ADNP/RYK/SEMA3F/MEGF8/ULK1/TRIM46/SEMA6B/LHX2/SEMA  
LN1/MLLT6/SART3/DNMT3B/UBE2N/CTBP1/PARP10/MORC2/TADA3/PAF1/UCN/PHF1/ING2/BCOR/S

PHGDH/ATP6AP2/KIF20B/TWIST1/CC2D2A/STK3/GLMN

ASE2/DROSHA/AGO2/CPSF4/RBX1/TATDN1/RAD9A/LAS1L/OGG1/RPA2/CUL4B/POLD3/ENDOD1/EXC

1A1/BTG2/BAD/BCL10/PTGER4/THBS1/CASP8

ADCY5/ATP7A/LARP1/ADCY3/PLA2G4A

1/MTPN/SPTAN1  
BST2/IRF8/HLA-G

LR1/LILRB1/CD80/TICAM1/UBE2J1/WNT5A

BIRC7/GPRC5B/IL1B/TXN/MLKL/ADRA2C/MAPK11/TGFB2/CALCA/MAP3K14/TNFK/C5AR1/STK10/T

1A2/GSTA1/ACSM2B/CD01/CYP2B6/CYP2E1/CYP2C8/GLYAT/CYP2C9/CYP2A6/CYP3A4

THY1/PALLD/HSP90AB1/EPHB6/ISL2/RELN/S100B/CDH11/ZSWIM5/MARK2/GDI1/EPHB3/NUMBL/M  
ADAM8/PRR7/HDAC2/CSNK1D/AXIN1/BBC3/PMAIP1/LYN/ADRM1/CCDC22/IL1B/GBA/CLN6/PHB/DN  
/RASA3/CALCA/PTGFR/PML/CCR1/OXTR/ERO1A/C5AR1/CXCL11/FAM155B/CCR5/CMKLR1/SWAP70/

S/BGN/LUM/APOBEC3D/PNP/CSPG5/OGG1/HPSE/CSPG4/SGSH/CEMIP/TDG/AMDHD2/PSAP/HEXB/BC

P2M1/VPS28/AGFG1/MVB12A/TRAPPC1/VPS18/CHMP1A/CALR/PRKCI/PLEKHJ1/SYT1/VPS25/AP3C

A2/OR6K2/OR13C4/OR2S2/OR2V2/OR7A17/OR6M1/OR5T2/OR1S2/OR7G3/OR4K17/OR4A15/OR12D3

CASP8/MYL9/HOXA5/SMAP1/TMEM64/WDR5/INHA/KITLG/EIF6/NOTCH2/HAX1/LDB1/INPP5D/CIB1

/POU2F1/POLR2B/SPIN1/POU2F2/SNAPC5/GTF3C3/NOL11/TP53/TAF11/GTF2E1/SNAPC1/SP1/GT

'/TYW3/RBM15B/DIMT1/DPH3/TRMT2B/CDK5RAP1/METTL3/MRM2/ADAR/METTL2A/TRMT2A/THADA/L  
2/BECN1/AP2A1/BET1L/RAB9A/SNX3/ARL1/SNX5/SNX16/VPS26A/TRIM27/MYO1D/VAMP3/KIF5B/

B1/CD80/TICAM1/UBE2J1/WNT5A

T10/PSAP/NOTCH1/UGCG/SFRP4/SLC4A7/MCOLN3/GLI1/ALOX15B/PPHLN1/RBPJ/EPHA2/CYP27B1

/STAT3

PLAA/DNAJA1

L36/QRSL1/MRPL14/LRPPRC/MRPL3/ERAL1/AURKAIP1/MRPL20/MRPL24/MRPS16/MRPL55/CHCHD1  
SBPL5/EXOC2

9A/BECN1/SNAPIN/VPS33A/ARF1/ATG7/VPS4A/RAB1A/KIAA1324/VPS16/FEZ2/RAB1B/PIP4K2B/  
G/MOV10/PPP1R8/ADAR/AAAS/AGO1/POLR2B/FXR1/EIF4G1/HNRNPA2B1/SMAD2/ELAVL1/ZMPSTE2

6/ATP2B4/PSEN2/CCL19/XCL1/CLIC2/HTT/CAV1/CALM3/PTPRC/CXCL10/ATP2A2/PLCG1/TMEM38

K5R1/UBR5/VPS11/ATG13/ANP32B/DMAP1/CIB1/CSNK2A2/HUWE1/TM9SF4/C2CD5/MYO1C/EFCAB7

ATF4/KDM1A/RAC1/ITGA2/IL1B/GNB1/SWI5/SERPINB6/IFI16/CASP1/MAP3K14/PARP1/NSMF/CR  
ATF4/KDM1A/RAC1/ITGA2/IL1B/GNB1/SWI5/SERPINB6/IFI16/CASP1/MAP3K14/PARP1/NSMF/CR

8/EMD/PSMA1/SFRP2/PSMB5/PSMA4/PSMD9/NOTCH1/SFRP4/TMEM64/GLI1/MESP1/PSMC3/STK3/R

7/UBE2E1/PSMB3/BARD1/UBE2A/PSMD4/PSMD3/RBX1/PSMD7/PELI1/CBL/RNF4/TRIM71/UBE2O/F  
.1B/RAP2A/MLKL/MAPK11/TGFB2/CD27/MAP3K14/TNIK/DVL2/LTBR/RPS3/STK10/APP/RELL2/MAF  
/ACTB/CTTN/CDH17/PARD6B/CDC42/LAMB3/PRKCI/WDR1/EPB41L3/PARD6G/WNT4/VMP1/LIMS1/A

F11A/E2F4/CDS1/PPP1CA/PITPNM1/EEF1D/PNKP/BCL3/IKBIP/BLM/NOC2L/ATF4/KDM1A/CDK5/T  
SA/PKP3/EZR/IGF2BP3/HSF1/PSMB9/GIPC1/ATP6VOB/DDIT3/TPCN1/PSMD14/ATP6VOD2/TIMP2/

/ACAT1/AMACR/ACADM/PECR/PLIN5/SCP2/CYP4F12/PHYH/CRYL1/CYP39A1/FABP1/LDHD/ALDH5A

35/CHTOP/BTG2/RAB3D/DOT1L/EEF2KMT/FAM98B/GTPBP3/WTAP/MBD3/MTHFR/BMT2/MIS18A/WDR  
TN2A2/CCL3/ABL1/FCGR2B/TNFAIP3/PTGER4/SRGN/MAVS/TLR2/ALOX15B/TWIST1/GLMN/IL17RA

G/MOV10/PPP1R8/ADAR/AAAS/AGO1/POLR2B/FXR1/EIF4G1/HNRNPA2B1/SMAD2/ELAVL1/ZMPSTE2  
.1B/CDK5/SPOCK1/ASCL2/GSK3A/INPP5J/TACSTD2/DGUOK/SEMA4B/CALR/SEMA4D/APP/GAL/SEMA  
12/PSME2/PSMD6/PSMC2/PSMA6/CUL2/FBXW11/FBXO27/PSMD5/FBXL15

CK1/CYP2C9/TAT/CYP2A6/CYP3A4

DOC/APP/NUP107/HK1

N1/PSMD14/ATP6VOD2/TIMP2/YBX3/CHMP4B/HMOX1/BAX/MAPKAPK2/SIRT6/SOGA1/NUP210/DHX3  
S/ALDH8A1/AMDHD1/AGXT2/MAT1A/PIPOX/CTH/ABAT/PAH/ALDH6A1/DAO/FTCD/UROC1/OTC/CD01

1/APOC3/ACSM2A/G6PC

ALT/PIGC/PRKD2/FUT6/ST3GAL5/PIGT/RACK1/ITGB8/CSNK1G2/CERS6/HACD1

/PTPN1/VEGFA/PAK2/DGKQ/ENPP2/TNFRSF14/HBEGF/KITLG/EREG/CRLF1/OSM/HAX1/EGF

1/WNT5A



PDCD4/FZD8/SERPINB3/MAP3K4/AIDA/MAPK8IP1/MAP2K7  
;/SOCS5/STAT3

P7A/ATP6V1B2/SLC9A6/SLC9A9/COX6C/ATP2A2/COX7A2/COX5A/ATP2C1/SLC25A3/SLC30A5/PAR  
ZA1/DAPK3/ITGB1BP1/RAC1/CBFB/CNTNAP1/ITGA2/ACTB/CTTN/KIFC3/TGFB2/CDH17/PTPN23/F

3/SMAD3/TP53/IWS1/TARDBP

MTHFD1L/SSR2/ZP3/PTK7/GINS4/PRKDC/STIL/FLVCR1/HIF1A/FZD1/PYGO2/ST14/HM13/GNA12/  
9/GDI1/SH2B2/ARFGAP1/DYNLT1/CYTH2/FLOT1/ARHGAP1/SHC1/RAP1GAP2/SIPA1L2/ARHGDIB/K

;/CSPG4/RAB3D/TNFAIP3/CSK

KLHL12/PEF1/DAB2IP/HMGA2/BMP2/LOXL3/WWTR1  
1/SCARA3/TRIM32/CASP3/MYC/HUS1/HYAL2/RELA/ERCC2/TMEM161A

BAAT/AASS/ACOT12/PIPOX/ACSM5/PDK4/HMGCS2/ACSM2B/SULT2A1/ACSM2A/GLYAT  
BAAT/AASS/ACOT12/PIPOX/ACSM5/PDK4/HMGCS2/ACSM2B/SULT2A1/ACSM2A/GLYAT  
BAAT/AASS/ACOT12/PIPOX/ACSM5/PDK4/HMGCS2/ACSM2B/SULT2A1/ACSM2A/GLYAT

ME6/TAZ/SEC13/VCP/NME7/PRKAA2/NME3/PFKFB2/STOML2/SLC25A12/PRKAG1/NME4/TIGAR/BPG

V2/PRAME/RPS6KA1/HSF1/FOXS1/IGFBP3/HNF1B/YBX3/BDKRB1/ATAD3A/CXCR4/SEMA4A/NDN/MA  
A/CREB3/RGS14/HIF1A/RNF34/PPP2R1A/SPRED1/BCL2L12/SIRPA/NOL3/TRIM59/HGS/SOCS1/F2

/CHMP2A/CHMP7/VPS37A/CHMP5

107/HK1/NME6/TAZ/SEC13/VCP/NME7/PRKAA2/NME3/PFKFB2/STOML2/SLC25A12/PRKAG1/NME4/  
1/ARG2/LILRB1/PDE5A/CD80/FGL2/LILRB2/ZBTB7B/PDCD1LG2/SOCS5/CD274  
BP1/MORF4L1/EP400/LDB1/SRCAP/TADA3/TRRAP/SUPT7L/MAP3K7/NAA60/IRF4/BRD7/NAA50/WE

AK1/CAPN10/TNFRSF4/SLC51B/CD58/IRF3/F2RL1/DYNLL1/PPARD/GPI/PPIA/ZC3H12A/BCAP31/  
1/TNFRSF11B/LAMC1/MMP1/CREB3L1/COMP/PLOD1/FSCN1/CTSK/TIMP2/COL5A1/ITGA5/SH3PXD2

12/PRPF19/ABL1/CSK/HDAC10/NOTCH1/TMEM98/TLR2/LGI4/PHGDH/METRN/PARD3/RHOA

/ZNF683/PTPRC/LOXL3/NFKBID/SH3RF1/IRF4/IFNG/ANXA1/CCR2/HLA-E/CLEC4A/ARG2/RPL22/  
M/POLL

/STUB1/BAG6/BBS7/SUMO2/RPL11/PARK7/RNF144A/NUB1/UBQLN2/ARIH2/TLK2/NKD2/ANKIB1/R  
RIM28/MTHFD1L/SSR2/ZP3/PTK7/GINS4/PRKDC/STIL/FLVCR1/HIF1A/FZD1/PYG02/ST14/HM13/

SMD4/PSMD3/RBX1/PSMD7/RACK1/PSMD8/EMD/PSMA1/SFRP2/NFATC4/PSMB5/PSMA4/PSMD9/NOTC  
AL/AXL/BTK/PELI1/BTN2A2/EMILIN1/FCGR2B/TNFAIP3/MILR1/TWSG1/PTPN2/IL20RB/HLA-F/R

ME6/TAZ/SEC13/VCP/NME7/PRKAA2/NME3/PFKFB2/STOML2/SLC25A12/PRKAG1/NME4/TIGAR/BPG

LA-DQB1/SLC50A1/CHST4/GBP5/RAB11FIP5/GLIPR2/MGAT5/HLA-DPA1/AREG/TRAPPC4/RAB6B/EME1/ZNF385A/HMGB3/CREB3L1/CHEK1/NABP2/MCM5/SMARCD1/HMGB2/TCF3/TRIM28/POLA2/BRMHKBP1/HLA-DQA1/HCK/GPC1/UNC13D/TUBB/LYZ/HLA-DRA/STARD3NL/CTSA/NCF4/RNASE6/HLA-DHD3/PHC2/RBL1/PCNA/MCRS1/CHAF1A/SMARCA4/ACTL6A/IRF1/COPS9/STAT1/HDAC1/PARPBP/DE.X2/SPC24/NCAPD2/DTL/UHRF1/SKA3/FLNA/SPC25/CDKN2A/MCM6/TUBG1/FEN1/CENPW/DSCC1/NC.AF13/CCT5/CSTB/EEF1E1/EXOSC4/CDK4/TCOF1/MAF1/TSEN54/EZR/EME1/ANKRD1/ZNF385A/NOFHKBP1/HLA-DQA1/HCK/GPC1/UNC13D/TUBB/LYZ/HLA-DRA/STARD3NL/CTSA/NCF4/RNASE6/HLA-DTCIRG1/CD63/STK11IP/SLC35F6/FPR1/NPC1/C3AR1/HSP90AB1/CLCN7/MFSD12/SORT1/GPR137EHKBP1/HLA-DQA1/MTMR2/ATP6V1F/HCK/GPC1/UNC13D/TUBB/LYZ/HLA-DRA/STARD3NL/CTSA/NCFEK1/HSF1/SAC3D1/CRMP1/ESPL1/RABEP2/MAPKAPK2/NCKAP5L/NDN/TRAF5/BRSK1/STIL/OLA1/R.F13/MCM3/NUP62/WDR34/CCT5/SPAG5/TAP1/MAPRE1/CENPU/ASPM/EZR/DCDC2/RABL6/CKAP2L/I/ASPM/DCDC2/CDC7/CKAP2L/HSF1/TMEM201/SAC3D1/KIF18A/CRMP1/RANGAP1/YEATS2/ESPL1/F1/ADAM15/CD151/PKP3/EZR/BSG/SCRIB/CTNND2/RHOG/RPL8/CFL1/PLAU/EPB41L2/MRC2/APBB1NBP1/TPCN1/ATP6VOD2/CHMP4B/SNX8/VPS37C/HLA-DPB1/RAB15/CLTA/TMEM165/HLA-DQB2/TCI.L2/LAMP5/RAB31/HLA-DQA1/NRGN/CD109/TAP1/FZD6/HLA-DRA/YKT6/IFNGR2/BSG/SYNGR2/HLA.M2/FLOT2/IQGAP1/ARPC4/MYL6B/SH3PXD2B/GBP2/LCP1/TPM3/PAK1/BAIAP2L1/STX1A/FCHSD1/VPS72/RNF34/UBE2I/DKC1/ACD/NSMCE2/PCNA/BASP1/EFTUD2/PPIH/LMNA/DPP3/NACC1/NXT1/N.A-DQB2/HLA-A/FGFR4/ANKRD27/STX1A/STX6/RAB3B/BIN1/ECE2/TGFA/COPE/TMED9/SORT1/STX.GB2/ALDH3B1/CEP131/SNAP25/RACGAP1/KCNJ11/PTAFR/COTL1/FERMT3/PRKCD/TOR4A/SERPINI.DQA1/NRGN/CD109/TAP1/FZD6/HLA-DRA/YKT6/IFNGR2/BSG/SYNGR2/HLA-DQB1/TRPM2/RHOG/SL.SPC25/CDKN2A/MCM6/FEN1/CENPW/DSCC1/NCAPH/GINS2/MCM10/SMARCD3/OIP5/CBX6/POLD1/MC.MP5/IL15RA/HLA-DRB1/B3GAT3/HRAS/RAB31/GAL3ST4/HLA-DQA1/GPC1/HLA-DRA/SCAMP3/YKT6./IFI30/TUBB4B/GRN/CYB561/ATP6VOD2/HLA-DPA1/HLA-DMB/TPCN1/CTSK/ATP6VOD2/SYNGR1/DN.NBP1/TPCN1/CTSK/ATP6VOD2/CHMP4B/SNX8/VPS37C/HLA-DPB1/RAB15/CLTA/RRAGD/TMEM165/R.3L1/NABP2/MCM5/SMARCD1/HMGB2/TCF3/TRIM28/POLA2/BRMS1/SIRT6/GINS4/PRKDC/RUVBL1/H.TMR2/MCM3/CDK4/NME2/TWF2/MAD2L1/MAF1/DEF6/EZR/RELT/GBP5/OSBPL3/HSF1/RAB34/RANGA.ECTIN1/ADAM15/CD151/PKP3/EZR/BSG/SCRIB/CTNND2/RHOG/RPL8/CFL1/PLAU/EPB41L2/MRC2/A/SCAMP3/YKT6/IFNGR2/RNF24/BSG/HLA-DQB1/SLC50A1/CHST4/GRN/GBP5/RAB11FIP5/GLIPR2.TCIRG1/CD63/STK11IP/SLC35F6/FPR1/NPC1/C3AR1/HSP90AB1/CLCN7/MFSD12/SORT1/GPR137E.O1A/CLIP2/COL1A2/SQSTM1/KRT17/SKA3/FLNA/TTL4/TNNT1/RASSF3/TUBG1/TPM4/RACGAP1/C.O1A/CLIP2/COL1A2/SQSTM1/KRT17/SKA3/FLNA/TTL4/TNNT1/RASSF3/TUBG1/TPM4/RACGAP1/C.TP1/STX3/CD44/ITGB2/ALDH3B1/CEP131/SNAP25/CDK16/RACGAP1/KCNJ11/PTAFR/COTL1/FERM.O1A/CLIP2/COL1A2/SQSTM1/KRT17/SKA3/FLNA/TTL4/TNNT1/RASSF3/TUBG1/TPM4/RACGAP1/C.4/RACGAP1/COTL1/ARHGEF2/KLC2/KRT80/REEP4/NME1/TRIM54/TPGS2/KIF11/GTSE1/HCK/CCT51/BRCA1/POLR2G/EFTUD2/MCRS1/TUBA1A/PPIH/SOCS1/RBM3/MRPS12/YBX1/RPS2/PABPC1/ILF2.RAC1/EHMT2/BUD31/SSRP1/ACTB/MTA2/TCP1/SWI5/DNMT3A/SIRT7/NSMF/SMARCB1/CPSF6/KMT51/ASPM/DCDC2/MID1IP1/TUBB4B/KIF12/TBCB/KIF3C/KIF18A/CCT6A/KIF21B/CCT3/GAS2L3/NC2/APBB1IP/ITGA5/FLOT2/MSN/IQGAP1/PTK7/SLC9A1/MAPK3/HSPA8/FZD1/PLEC/LCP1/MAP2K2/B1IP/ITGA5/FLOT2/MSN/IQGAP1/PTK7/SLC9A1/MAPK3/HSPA8/FZD1/PLEC/LCP1/MAP2K2/SLC4A2/APBB1IP/ITGA5/FLOT2/MSN/IQGAP1/PTK7/SLC9A1/MAPK3/HSPA8/FZD1/PLEC/LCP1/MAP2K2/1/CD58/C3AR1/DYNLL1/NBEAL2/OLR1/SLC2A5/PAM/RAB24/SRI/CD68/NCKAP1L/ADAM8/LAMP3/C.PDE4A/IQGAP1/SLC9A1/DGKZ/DUOX2/LCP1/PAK1/BSPRY/THY1/CORO1C/PALLD/DUOX2/SLC39A6./CENPU/CHEK1/HSF1/NABP2/KIF18A/RANGAP1/MCM5/CENPL/SIRT6/SGO2/PRKDC/CBX1/CENPE/F.TMEM165/HSPA8/RRAGC/NEU1/HLA-DQB2/TCIRG1/CD63/ABCB6/STK11IP/SLC35F6/FPR1/NPC1/C.AP3/MRPS7/LARP4B/MRPL53/MPV17L2/RPS7/RPL7A/RPS23/RPS10/MRPS17/MRPS21/RPS15/RPS1./BORCS8/GSDMD/RPL27/RPL35/RPS20/RPL18A/RPS19/IKBK/FAADD/RRM1/RPLP0/RPL18/SGTB/R.SMCE2/SGO1/SPDL1/RRS1/KNTC1/ERCC6L/NCAPG2/NUP37/INCCENP/CBX3/BLM/RSPH1/ITGB3BP/C

VIL1/WASF1/PIEZ01/KPTN/ABI3/FGD6/NRBP1/APP/SWAP70/STX4/ABI2/FGD1/CSPG4/NF2/BRK1  
NTC1/ERCC6L/NUP37/INCENP/CBX3/ITGB3BP/DCTN2/KNSTRN/DCTN5/CENPI/DNMT3A/NUP85/PPF  
5/RHEB/SNRPB2/PRPF19/SART1/PHF5A/MYEF2/DDX23/PRKRIP1/PRPF38A/HNRNPU/HTATSF1/LSM  
23/RPS10/MRPS17/MRPS21/RPS15/RPS16/MRPS15/RPL5/RPS27A/MRPL18/RPS12/RPS4X/RPL6/R  
ADAM8/CAPN1/C1orf35/ASAHI/KPNB1/SLC11A1/RAC1/CTSS/LAMTOR1/GNS/PSMA5/SERPINB6/PS  
TSS/GNS/FTL/GALNS/DSN1/BGN/PSMD1/PADI2/TRAPPC1/LUM/CTSD/CSPG5/CCT8/HPSE/CSPG4/S  
LI1/DSN1/RAE1/KIF2A/ODF2/TOPBP1/RAD21/KATNB1/IKBKG/NDE1/CKAP2/CKAP5/EMD/NSFL1C/  
SN1/INPP5J/ARF4/RPS3/FGD6/SPRY4/MYO5A/ARFIP2/FGD1/NF2/WWC1/DBNL/DNM2/ADAM17/ACT  
NXA11/RAP2A/PPP1CC/CIT/KLHDC8B/RALA/CDC42/KATNB1/RACK1/RALB/NAT10/TXNDC9/DNM2/K  
D47/NRAS/SERPINB6/PTPN6/DYNC1LI1/ATP6VOC/TMEM63A/GSDMD/GPR84/CNN2/ALDOC/LAIR1/C  
TP6VOC/PSMD1/PADI2/TRAPPC1/CCT8/S100A7/GCA/RAB3D/VCP/STX7/VAMP8/RAB5C/PSAP/MAN2  
EX1D2/DCTN1/HAUS7/MAP1A/FNTB/HAUS5/FNTA/DYNC1I2/EML2/KIF20B/KIF22  
TP6VOC/PSMD1/PADI2/TRAPPC1/CCT8/S100A7/GCA/RAB3D/VCP/STX7/VAMP8/RAB5C/PSAP/MAN2  
53/DCLRE1B/GAR1/CHEK2/HAT1/NBN/ERCC1/THOC2/RNF8/RPA1/ATR/TP53BP1/THOC1/DCLRE1C/  
BT1/TLR2/ANXA3/HLA-F/RAB11A/RAPGEF1/STXBP1/TAPBP/TAP2/STXBP4/BECN1/TLR7/RAB9A/P  
ENPK/NUP43/DYNC1LI1/DSN1/ZNF207/CBX5/NUP107/MTBP/CENPN/NDE1/ZWILCH/CKAP5/SEC13/  
/CTSD/PSMD7/GMFG/PRDX4/CCT8/PAFAH1B2/ARPC5/VCP/VCL/PDAP1/BIN2/DBNL/HSP90AA1  
MRPL28/RPL37A/MRPL51/MRPL11/RPLP1/RPL32/RPL30/MRPL15/C12orf65/MRPL4/SURF6/RPL29  
UP43/DYNC1LI1/DSN1/KMT5C/CENPB/ZNF207/NUP107/CENPN/NDE1/ZWILCH/CKAP5

07/CENPN/NDE1/ZWILCH/CKAP5  
/DCLRE1C/DDB1/TFIP11/THOC7/THOC3/POLR2B/TERF1/LRIF1/PPP1CB/ORC4/XRCC5  
GOSR2/COPB1/AP2A1/COPA/KLHL12/PEF1/PKD1  
B27B/TPP1/HSP90B1/RAB9A/PDIA3/SND1/ATP6V1B2/RAB1A/GNA13/P4HB/CNP/PDIA4/NCSTN/CT  
B27B/TPP1/HSP90B1/RAB9A/PDIA3/SND1/ATP6V1B2/RAB1A/GNA13/P4HB/CNP/PDIA4/NCSTN/CT  
A/RPL37A/RPLP1/RPL32/RPL30/SURF6/RPS9/RPS14/RPS27/RPL29/EIF2D/RPL13/RPL4/RPL41/  
/KATNA1/HNRNPU/EML2/KIF20B/KIF22

ASC3/DHX8/RBM8A/MAGOH/BNRNP3/TFIP11/IK/SNRNP200/RBM22/BUD13/CCDC12/LUC7L3/LSM3  
/TFIP11/SNRNP200/RBM22/HNRNPC/SYNCRIP/HNRNPA2B1/LSM3/CACTIN/BCAS2/XAB2/SYF2/HNR  
F3B6/SNRNP3/SNRNP200/DDX20/GEMIN8/GEMIN6/SMN2/LUC7L3/GEMIN5/LSM3

/PDCD11/ZNF622/RRP15/WDR3

/RPL26L1/RPL22/GEMIN5

RAB31/HLA-DQA1/ABHD17C/MTMR2/GPC1/UNC13D/PRAF2/RUSC1/HLA-DRA/STARD3NL/SCAMP3/YK  
C2/BRCA1/NSMCE2/POLR2G/PCNA/MED10/MCRS1/CD3EAP/ACTL6A/SOCS1/CKS1B/DDA1/TSPAN17/  
SD/STX4/CLEC5A/HPSE/KCNAB2/VCL/HVCN1/VAMP8/CD33/CD177/OLFM4/TMBIM1/SLC15A4/ANXA  
1/TNFRSF1B/CD59/MOSPD2/DGAT1/VAMP1/MMP25/UBR4/MCEMP1

DGKQ/DCAF7/EBNA1BP2/EIF6/SUV39H1/MAEA/MORC2/THOC1/ARFGEF1/ANAPC4/PRR14/CASK/ENC  
2/GOLPH3L/SULF2/TMEM115/TMEM87A/FUT11/RAB27B/COG2/BET1L/YIPF1/B3GALT6  
ITD1/ARL8B/VPS37B/VPS11/GOSR2/RAB27B/IFITM3/ATG9A/VPS33A/YIPF1/LITAF/VPS4A/SLC9  
UFIP2/BTF3/NAA38  
RAB11FIP1/MCOLN1

AF9/SFPQ/ASCL2/E2F2/PARP1/VDR/CDK7/HNRNPAB/KAT2A/GTF3C2/XRCC6/MED25/GTF3C1/E2F6  
ABRA3/PPP1R9B/IQCE/RAB35/PIP5K1C/HIP1R/SLC9A3R1/FERMT1/EHD1/SYTL1/ATF4/RAC1/PDE

/NUP210/GNAZ/MAPK3/LRRC59/SLC52A3/UBE2I/CERS5/PAK1/STX1A/BIN1/NPC1/YBX1/LMNA/NU

1G2/AP1B1/M6PR/RASSF9/CEMIP/VAMP8/WIPI1/DBNL/DNM2/TNK2/CFTR/AAK1/RAB3A/MYO6/AP2  
PG1/TMEM199/PDCD6/RASSF9/CEMIP/SEC13/VAMP8/DBNL/COPG2/CFTR/RAB3A/SREBF1/MYO6/HL  
AP1S1/AP2B1/HBEGF/BTC/AP2A1/EREG

LD/HLA-B/SYT12/ICA1/SYT1/DNM1L/AP1G2/SYT3/CPE/PDCD6/RASSF9/SEC13/SGTA/RAB3A/SRE

1/SEC23B/CHMP4A/HIP1/TEPSIN/ARFGAP3/AFTPH/AP3M1/SCYL1

1/SEC23B/CHMP4A/HIP1/TEPSIN/ARFGAP3/AFTPH/AP3M1/SCYL1

C/BTBD10/SNRPB2/PAFAH1B2/UTP6/HEATR1/TIMM13/NOP10/AKNA/GAR1/NOL6/POP5/SP140/TAF

OT1/CAP1/CAPZA1/RTKN/GYPC/PHLDB1/HCLS1/GLRX3/ACTB/CTTN/MYADM/WAS/CLTB/RAB10/FGF  
L3/CFTR/SREBF1/HLA-F/PACSN1/ERGIC3/COPB2/CLTC/AP1S1/GOSR2/RAB27B/COPB1/AP2A1/A

:/POLR3A/ERCC2/SUPT3H/ZNRD1/TP53/TBPL1/TAF11/GTF2E1/TAF4/TAF2/TWISTNB/ZNFX1/GTF2  
AMP3/TMEM79/VPS54/RAB6A/PLD4/TEPSIN/MMP24/AFTPH/COG5/STX16

:/POLR3A/ERCC2/SUPT3H/ZNRD1/TP53/TBPL1/TAF11/GTF2E1/TAF4/TAF2/TWISTNB/GTF2B/POLR

RAB24/STAB1/ACTG1/SH3KBP1/ADAM8/HLA-DQA2/FZD2/MSR1/SLC11A1/HSPH1/RAB20/HLA-DRB5  
ADAM17/MYO6/PACSN2/PACSN1/TLN1/RHOA/PDPN/FAP/EPS8L1/EPHA2/KSR1/MPP2/CIB1/C2CE  
PA2B1/AKAP8/LRIF1/MBD1/SMC1A/TP53/TEP1

:/POLR3A/ERCC2/SUPT3H/ZNRD1/TP53/TBPL1/TAF11/GTF2E1/TAF4/TAF2/TWISTNB/GTF2B/POLR

9A7/OCRL/AP1B1/STX4/ARFIP2/M6PR/PIFO/CLIP3/ARAP1/DENND5A/WIPI1/DNM2/SYS1/COG1/S

CRL/STX4/ATP6VOD1/WNT4/HVCN1/VAMP8/DNM2/RPS27A/DMBT1/TLR2/ANXA3/UBA52/HLA-F/AP2

ACAP1/LZTR1/CD274/EHD3/ZFYVE27/STX12/HLA-G

P2/CLTB/AP2M1/NCALD/DVL2/GAD1/AP2S1/HLA-B/VPS18/SYT1/APP/OCRL/AP1G2/AP1B1/M6PR/  
GIT1/MAPK8IP2/DLG3/ASAP1/NECTIN1/SYNGR2/DLGAP4/SCRIB/CTNND2/RPL8/DNAJC6/GIPC1/L  
/CFD/OLA1/PSMD2/HSPA8/NEU1/GM2A/SERPINE1/SLPI/FUCA2/STK11IP/RNASET2/MNDA/PTGES2

.1/PRMT5/NCOA6/PHF1/DPY30/ERH/MAX/DYDC2/KMT2B/KDM4A/SETD1A/PHF20/SUZ12/TAF4/MEN1

P/SFPQ/PQBP1/IFI16/SRSF12/PPP1CC/C12orf57/PRCC/SURF2/IL15/THOC6/RNF113A/CPSF6/E  
C/TUBA1A/RTN4RL2/NPC1/OLR1/SLC9A3R1/FLOT1/PLLP/RANGRF/KCNQ1/DAPK3/PLSCR1/CLN3/L

C/TUBA1A/RTN4RL2/NPC1/OLR1/SLC9A3R1/FLOT1/PLLP/RANGRF/KCNQ1/DAPK3/PLSCR1/CLN3/L

RABAC1/ATP6V0D1/RAB3D/MFF/STX7/SGTA/VPS45/VDAC2/RAB3A/COPS5/SLC17A5/BCL2L1/STXE  
15/UBE2N/SPATA2/IMP4/ACACA/IP6K2/COIL/TRIM27/CC2D1A/YY1AP1/MLLT1/CHCHD1/TERF1/F

F/STX7/SGTA/VPS45/VDAC2/RAB3A/COPS5/SLC17A5/BCL2L1/STXBP5/RAB27B/ATG9A/PSEN2/SN  
/CORO1C/TUBA1A/RTN4RL2/NPC1/OLR1/SLC9A3R1/FLOT1/PLLP/RANGRF/KCNQ1/DAPK3/PLSCR1/  
FG/WDR1/NF2/EMD/ACTR3/DBNL/DCTN1/CAPN2/CTBP2/WIPF2/EXOC3/DSTN/PLEKHH2/ACTN4/SPT  
PPL3/PTPN1/GNAI3/RHOA/CAV2/CISD1/PTPRC/LITAF/CYTH3/SNX5/GNA13/ATP2A2/EPB41/ATP2

1/PALLD/HSP90AB1/DYNLL1/DYNC1H1/CAD/ARPC3/BLOC1S4/DYNLT1/CYTH2/ACTG1/SRI/TUBB4A

C1/BCL9L/TAF1D/PTOV1/GTF2E2/NR1H2/RUNX3/GTF2H1/TAF13/TBP/MMS19/TFDP1/LDB1/GTF2F  
UFA7/MRPS26/MRPS11/MRPL42/MRPL22/MRPL58/MRPL38/MRPS30/MRPS27/MRPS18A/MTG2/MRPL4  
UFA7/MRPS26/MRPS11/MRPL42/MRPL22/MRPL58/MRPL38/MRPS30/MRPS27/MRPS18A/MTG2/MRPL4

ANT1/CFD/OLA1/PSMD2/HSPA8/NEU1/GM2A/SERPINE1/SLPI/FUCA2/STK11IP/RNASET2/MNDA/PT  
/HIF1A/LAMC2/FCHSD1/RHOF/TNFAIP2/CORO1C/GPSM1/DYNLL1/DYNC1H1/TIGD5/WIPF1/HIP1R/  
/CDK5/CTTN/ADRA2C/STMN3/INPP5J/GAD1/APP/GDPD5/AP3D1/KATNB1/CBL/MYO5A/CCDC120/AT



IKBK~~G~~/UBE2L6/RNF7/CUL4B/DCAF15/PDCD6/MED12/TRAF7/KLHL42/VHL/KCTD5/FBXW5/RNF2/RA

FNDC5/AGXT

FNDC5/AGXT

B/BCAS2/JUP/GTF2B/MED1/POLD4/HP1BP3/HHEX/PLRG1/RPA3/TOP1/SP3/GTF2H3/GTF2F2/HOXA

ANT1/CFD/OLA1/PSMD2/HSPA8/NEU1/GM2A/SERPINE1/SLPI/FUCA2/STK11IP/RNASET2/MNDA/PT

RPS18A/RPS25/MRPS9/EIF2A/MRPS35/MRPS33/MRPS10

3H/POLR3C/TAF12/ACVR1/TAF10/DNA2/CCND3/PRKAA2/ACVR1B/CCNJL/ERCC1/CCNE2/MYO6/GTF

BNL/HSP90AA1/DNM2/LMTK2/ZPR1/TUBB3/KIF20B/CDK5R1/PARD3/EXOC3/APBB1/HNRNPR/ACAP3

/MRPL18/TOMM22/MTX1/NDUFB3/TIMM10/MRPL37/NDUFA13/NSUN4/MRPL27/MRPL28/ANKZF1/MRF

OR1/TMEM9/ANKRD13B/CHMP3/SLC29A3/VPS28/CD79A/MVB12A/CST7/PARM1/STARD3/VPS18/CHM  
NRGN/MAPK8IP2/DLG3/ASAP1/NECTIN1/MAF1/YKT6/ZNF385A/TRPM2/CTNND2/IFT57/NCF1/RANG

1/DNM2/LMTK2/ZPR1/TUBB3/KIF20B/CDK5R1/PARD3/EXOC3/APBB1/HNRNPR/ACAP3/NIN/DPYSL3

1/RPL7/ADRA2C/HOMER1/CACNG4/LRFN4/TN~~I~~K/MAP4/ABR/NSMF/LRP8/RPS3/ARRB2/DROSHA/KLH

SCAMP2/CFTR/PDLIM4/FIG4/OPTN/PACSLIN2/GGA3/HLA-F/LMTK2/RAB11A/RAB29/ABHD17A/ATG9

HHADH/DAO/HAO2/HAO1/FNDC5/AGXT

TOP/LARP4B/SYMPK/VCP/PSMA4/PRKAA2/BTBD2/HNRNP/SAARNP/RPS4X/RPL6/TRIM21/PSMC3/CA

HHADH/DAO/HAO2/HAO1/FNDC5/AGXT

DRA2C/HOMER1/CACNG4/PPP1CC/LRFN4/TNFRK/ADAM23/PFN1/PPP1R1B/ABR/EIF4A3/ARF4/VPS18

/RAD23A/PSMD12/ZFAND2B/PSME2/TXNL1/PSMD6/SUPT20H/SEC11A/PSMC2/PSMA6/SPCS2

/CACNG4/LRFN4/TNFRK/MAP4/ABR/NSMF/LRP8/RPS3/ARRB2/DROSHA/KLHL17/SEMA4F/SH3GL1/RF

PL49

PL49

CHCHD3/TPST1/SYT1/DMPK/POMGNT1/CHST12/MFNG/LFNG/RHOT2/MFF/APOO/LEMD2/B4GALNT2/S

ARCA4/ACTL6A/STAT1/TICRR/HDAC1/WDR13/DDX11/E2F4/LEF1/NELFE/ZC3H12A/NOC2L/NONO/H  
BRCA1/BASP1/MED10/SMARCA4/RCOR2/ACTL6A/IRF3/E2F8/HDAC1/PRMT2/PIR/WDR77/SUB1/REX  
IM28/CCL5/MAPKAPK2/STK17A/BRSK1/PKDCC/PDGFRL/PTK7/PRKDC/MAPK3/MAST2/MAP2K2/PAK1  
L8/COMP/EPB41L2/COL5A1/NUTF2/MFGE8/FRAS1/MAP2/TPM2/MSN/ZP3/SRPX2/CLTA/ARPC4/TUF  
QGAP1/SH3PXD2B/EFNA5/RGS14/NUPR1/GM2A/MAP2K2/ANKRD27/THY1/NSMAF/ARHGAP9/CKS1B/A  
/ARL4C/MARCKS/FLNA/TTL4/TNNT1/FCHO1/FXYD5/TPM4/RACGAP1/CCDC88B/KCNJ11/COTL1/AR  
DK4/NME2/CSF1R/CDC7/GUCY2C/PGK1/CHEK1/RPS6KA1/LIMK2/JAK3/GRK6/TRIM28/CCL5/MAPK  
2/ABCD1/HRAS/RAB31/KIF11/PIF1/MCM3/ATP6V1F/WDR34/TAP1/TUBB/MX2/NUDT14/ENTPD2/RH  
2/ABCD1/HRAS/RAB31/KIF11/PIF1/MCM3/ATP6V1F/WDR34/TAP1/TUBB/MX2/NUDT14/ENTPD2/RH  
2/ABCD1/HRAS/RAB31/KIF11/PIF1/MCM3/ATP6V1F/WDR34/TAP1/TUBB/MX2/NUDT14/ENTPD2/RH  
2/ABCD1/HRAS/RAB31/KIF11/PIF1/MCM3/ATP6V1F/WDR34/TAP1/TUBB/MX2/ENTPD2/RHOG/TUBE  
CD/HSPB1/RELB/ITGAV/IL15RA/PLEK/ADAM9/MVP/SYK/KIF11/STK39/MAPRE1/CDC25A/TWF2/MA  
/ADAM9/MVP/SYK/KIF11/STK39/MAPRE1/CDC25A/TWF2/MAPK8IP2/HDAC7/EZR/CDKN2D/RHOG/HS  
6A/CARD9/RHOQ/GIPC1/EPB41L2/DDIT3/WIPF3/HMGB2/WASF2/TRIM28/CACYBP/BAX/NROB1/CAS  
LN/WFDC2/GAPDH/GSTP1/GPC3/PPP1R14D/BIRC3/IRAK1/PI3/CDKN2A/CST1/PPP1R14B/RACGAP1  
NECTIN1/ADAM15/YKT6/CD151/PAK3/EZR/BSG/COL16A1/COL3A1/NOP56/SCRIB/CTNND2/COMP/R  
A/SH2D3A/RRAGD/RRAGC/LCP1/MICALL1/ATP6AP1/PAK1/ANKRD27/RASGEF1A/COR01C/PPP6R1/Y  
18/ARPC4/PLEC/LCP1/MAP1S/TPM3/BAIAP2L1/COR01C/BIN1/COR07/PALLD/ARPC2/MYO19/GAS7  
PIM2/PAK4/DAPK3/CSNK1D/CDK2/ESK1/STK17B/CDC42BPG/PKN3/ALPK3/CDK5/MLKL/MAPK11/H  
/HSPA8/TCIRG1/CENPE/CHD3/ATP6AP1/ABCB6/ABCF2/XRCC2/SMARCA4/HSP90AB1/DYNLL1/DYNC  
NKRD27/RASGEF1A/COR01C/PPP6R1/DENND2D/ARHGEF19/NXT1/TBC1D1/RIN1/GDI1/XPO6/CSE1L  
NKRD27/RASGEF1A/COR01C/PPP6R1/DENND2D/ARHGEF19/NXT1/TBC1D1/RIN1/GDI1/XPO6/CSE1L

KN/RAP1GAP2/SIPA1L2/ARHGDIB/TBC1D30/HSPH1/ITGB1BP1/DNAJB2/WAS/GPSM3/TBC1D13/RAS  
'/FAM83D/GAS2L3/NDN/MAP2/MTCL1/BRSK1/GPAA1/RGS14/MAP1S/MAST2/CENPE/BRCA1/KLC3/CA  
GAP1/EFHD2/PROM1/OLA1/RUVBL1/LRRC59/HSPA8/PLEC/MICALL1/PPP1R13L/NUDC/BAIAP2L1/C  
./RAB3B/RASEF/RAB7B/RRAS/RAB35/ARF3/RAB24/GTPBP2/GTPBP4/TUBB4A/ARHGDIB/RAB20/RAC  
L1B/TNFSF13B/CD300LF/CCL4/TGFB2/IL12RB1/CXCL16/IL15/CADM4/TNFSF12/PF4V1/TRAF3/G  
ARHGDIB/TBC1D30/ITGB1BP1/WAS/GPSM3/TBC1D13/RASA3/ARHGAP30/AGFG1/ABR/SIPA1L3/CDC  
3/ARHGAP30/AGFG1/ABR/SIPA1L3/SYDE1/RUNDC1/LLGL1/ARHGAP18/RANBP1/AGAP1/CDC42EP2/  
2  
'APN6/KIFC2/GAS2L1/KIF14/CAMSAP2/KIFC3/KIF15/MAP1LC3B/MAP4/RAE1/KIF2A/RPS3/ZNF2C  
DNASE2/MCM8/XRCC6/POLQ/MUTYH/TATDN1/RAD9A/OGG1/POLD3/RAD51C/PTGES3/DNA2/DCLRE1E  
S/VIL1/NEB/KPTN/CAPZB/KLHL17/MYO5A/WDR1/ARPC1A/ARPC5/TNNI3/ABL1/ZNF185/ACTR3/DE  
2/CDC42EP2/MYO9B/OCRL/ABI2/ARHGDIA/ARFIP2/FMNL3/PARD6G/FGD1/OBSCN/BRK1/ARHGEF3/  
2/CCND3/PRKRIP1/CCNJL/DUS2/CCNE2/PAK2/CSNK2B/DGKQ/CDC37/CDK5R1/PRKAR1B/DAXX/STK  
H3GL1/ECM1/RABAC1/XRCC4/CEP250/MED12/ABL1/SIPA1/CSK/CIITA/DBNL/BCL10/MCHR1/PIAS  
/PHF6/BAZ2A/NCAPD3/APBB1/DAXX/MLLT6/RNF8/SART3/ANP32A/ANP32B/HINFP/SMARCA5/DNAJ  
16/MRPS15/RPL5/RPS27A/MRPL18/RPS12/RPS4X/RPL6/RPL37/RPL27A/RPL36/UBA52/RPL19/MR  
A1  
PDLIM4/MASTL/PARD3/AP3B1/ATP2B4/ANAPC5/CDC27/HSP90B1/SNX3/DAB2IP/GTF2F1/ENSA/AN  
TPN12/DNM2/ADAM17/FUT8/INPPL1/SH3BGRL/CD2AP/RAPGEF1/SOCS7/KHDRBS3/ELMO2/DPYSL3/  
SPA14/AIP/CDC37/PPIE/PPIB/TAPBP/DNAJC4/HSP90B1/HSPA13/PPIC/HSPB6/TMEM67/AAMP  
DAM17/S1PR3/CD177/ADAMTS5/ACTN1/TLN1/ACTN4/EGFL6/FAP

K/DDR1/WNK2/CDK4/NME2/CSF1R/CDC7/GUCY2C/PTDSS2/PGK1/CHEK1/RPS6KA1/LIMK2/JAK3/GR  
PABPC4/GNL3/HNRNPM/SLBP/HNRNPA3/SUPT5H/JRK/MRPS7/RPS7/MYEF2/RBM45/RPL5/HNRNPU/T  
/CSRNP2/PPP1R15A/SH3GL1/RACK1/IGBP1/RPA2/MAPT/ANKLE2/VCP/KCNN4/CSK/BAD/CD33/BOE  
5/RFC5/DDX10/DHX15/DHX9/SMARCA5/DDX55/SMARCAL1/EP400/SRCAP/DHX38/ERCC3/DDX52/DH  
9/NAA15/EIF6/SND1/GTPBP6/LARP1/BAG6/SRP68/YTHDF1/SNRPD3/UNK/PRMT5/ERAL1/PYM1/WT

'4B/PKIA/CALM2/CCND3/BCL10/PRKRIP1/CCNJL/DUS2/CCNE2/PAK2/CSNK2B/DGKQ/CDC37/CDK5R

GUCY2C/CHEK1/RPS6KA1/LIMK2/JAK3/GRK6/TRIM28/CCL5/MAPKAPK2/STK17A/BRSK1/PKDCC/PC  
YN/WFS1/UBE2L3/TCP1/PML/MAP1LC3B/UBE2D1/ATP6VOC/LTBR/PSMD1/TRAF3/RALA/UBE2A/ARR  
/GRB2/ARRB2/VPS18/CBX5/CHCHD3/CDC42SE2/KLHL17/COL8A2/SKAP2/TELO2/ACTL8/ABI2/RAC

ML/MAP1LC3B/UBE2D1/ATP6VOC/LTBR/PSMD1/TRAF3/RALA/UBE2A/ARRB2/CALR/DNM1L/RBX1/IK

B3B/RASEF/HSP90AB1/RAB7B/RRAS/RAB35/TGM2/ARF3/RAB24/GTPBP2/EHD1/GTPBP4/SPAG1/TU  
B3B/RASEF/HSP90AB1/RAB7B/RRAS/RAB35/TGM2/ARF3/RAB24/GTPBP2/EHD1/GTPBP4/SPAG1/TU

NX20/WIP1/ZFYVE19/GOLPH3L/TECPR1/SESTD1/PARD3

SP90AB1/RAB7B/RRAS/RAB35/TGM2/ARF3/RAB24/GTPBP2/EHD1/GTPBP4/SPAG1/TUBB4A/RTKN/R  
SP90AB1/RAB7B/RRAS/RAB35/TGM2/ARF3/RAB24/GTPBP2/EHD1/GTPBP4/SPAG1/TUBB4A/RTKN/R

7/GRB7/GSDMD/SYT1/DPEP1/SNX12/BTK/ARFIP2/PLEKHN1/MAPT/OBSCN/SNX11/ARAP1/SNX20/W

B1/RAB7B/RRAS/RAB35/TGM2/ARF3/RAB24/GTPBP2/EHD1/GTPBP4/SPAG1/TUBB4A/RTKN/RAB20/  
TRADD/BICD1/MAP1A/OPTN/SH3BGRL/AP2A2/RBM14/VPS11/GATAD2A/AP2B1/ARRDC1/AP2A1/MMS

THBS1

A5/IGSF1/IL34/EBI3/LEFTY1/MANF/LYPD6B/SECTM1/TGFA/CCL13/OSGIN2/GPI/CLEC11A/IL18

/TBC1D7/DENND5A/SGSM3/BICD1/RGP1/TBC1D22B/OPTN/RABGGTB/RUSC2/DENND4B/RAB29/YIPF

SP90AB1/RAB7B/RRAS/RAB35/TGM2/ARF3/RAB24/GTPBP2/EHD1/GTPBP4/SPAG1/TUBB4A/RTKN/R  
SP90AB1/RAB7B/RRAS/RAB35/TGM2/ARF3/RAB24/GTPBP2/EHD1/GTPBP4/SPAG1/TUBB4A/RTKN/R

.1/CYP2A6/CYP3A4

ARDBP

PP1R13L/TAF6/NPM1/RBBP8/BRCA1/RBL1/PCNA/SMARCA4/RCOR2/STAT1/E2F8/HDAC1/E2F3/PRM

K7/MYCBP/PRPF6/SMARCC1/USP22/KAT2A/MED24/PRRX1/HSF2/RBPMS/ATXN7L3/GMEB1/FUS/DR1  
1/RTCA/FARSB/EIF4A3/ISG20/EXOSC5/FTSJ3/HENMT1/POLR2L/DDX41/DROSHA/AGO2/PRIM2/PC

CYP2A6/CYP3A4

A2C/PHB/CCL4/HOMER1/CALCA/DVL2/CXCL16/PPP1R1B/PF4V1/RALA/ARRB2/GRK2/CXCL11/XCL2  
NT4/RERE/MEIS2/ARID5A/CBFA2T2/LMCD1/MTA3/HNRNPU/PIAS4/CTBP2/HSF4/MAP3K10/MECP2/

A2/OR6K2/OR13C4/OR2S2/OR2V2/OR7A17/OR6M1/OR5T2/OR1S2/OR7G3/OR4K17/OR4A15/OR12D3

3/LEFTY1/MANF/SECTM1/TGFA/CCL13/OSGIN2/GPI/CLEC11A/JAG2/CCL2/TXLNA/CXCL9/CXCL3/

CYP2A6/CYP3A4

13A1/ERCC6L/RFC2/DDX11/BLM/ATP6V1H/KIF14/ATP6V1E1/KIFC3/PSMC4/ABCA2/ATP6V0C/ATF



CYP8B1/CYP2A6/CYP3A4

NF704/GATA4/NFATC1/ZBTB7B/KMT2A/HOXC6/HOXB5/GATA3/SMARCE1/SMARCC2

/UBE2E1/FBXL6/TRAF3/BARD1/UBE2A/ASB1/CDC42/RBX1/UFC1/PELI1/CBL/RNF4/UBE2L6/RFWL

C17A2/SLC6A1/SLC01B1/SLC38A4/SLC13A5/SLC27A5/AQP9/SLC10A1

YP2E1/CYP2C8/CYP2C9/CYP8B1/CYP2A6/CYP3A4

C17A2/SLC6A1/SLC01B1/SLC38A4/SLC13A5/SLC27A5/AQP9/SLC10A1

NF40/RBMS1/CARHSP1/TUT1/NUDT21/RBM4

REB3L1/NPAS2/HSF1/GLIS2/FOXS1/MCM5/DDIT3/BHLHE41/HNF1B/HMGB2/YBX3/TCF3/NDN/PRK

/RASSF7/RAN/SAC3D1/KIF18A/CRMP1/CHMP4B/ESPL1/GAS2L3/NCKAP5L/MAP2/MTCL1/BRSK1/EF  
1/SAPCD2/PBK/KIF18B/ORC1/MISP/ECT2/NUSAP1/CCNF/TTK/TGFB1/SKA1/RAD51/IQGAP3/RCC2  
IP2/FMNL2/CSF1R/NECTIN1/UNC5B/EZR/BSG/ZNF385A/DCDC2/LAMC1/TRPV2/FZD7/SCRIB/CTNN  
C7/EZR/IGF2BP3/VTCN1/GBP5/HSF1/CARD9/DDIT3/HLA-DPA1/LTB/VSIG4/TRAF2/HMGB2/TRIM6  
i/HSF1/CARD9/DDIT3/HLA-DPA1/LTB/VSIG4/TRAF2/HMGB2/TRIM6/JAK3/HMOX1/CD86/MAPKAPK2  
ASH3/BRCA1/MNDA/ZNF580/SPON2/CD58/IRF1/IRF3/C3AR1/F2RL1/STAT1/RAB7B/NPLOC4/CD83  
RKX/LAMA5/MLLT3/IFT52/STAT1/ARHGEF19/LZTS2/PLOD3/PSMB2/PPP1CA/LEF1/FGFR1/TGM2/F  
S100A8/LYZ/NME2/CTSA/TRPM2/QPCT/RHOG/TUBB4B/GRN/TNFAIP6/CD53/PLAU/TFRC/HLA-DMB/  
UBB/CSTB/S100A8/LYZ/NME2/CTSA/TRPM2/QPCT/RHOG/TUBB4B/GRN/TNFAIP6/CD53/PLAU/VSIG  
ATAD3B/CHIT1/PSMD14/TIMP2/SYNGR1/HMOX1/DNAJC5/HSPA6/DDOST/ALOX5/PLEKHO2/MIF/CD3  
JC5/HSPA6/DDOST/ALOX5/PLEKHO2/MIF/CD300A/CANT1/IQGAP1/CFD/FTH1/STXBP2/PSMD2/ITC  
S100A8/LYZ/NME2/CTSA/TRPM2/QPCT/RHOG/TUBB4B/GRN/TNFAIP6/CD53/PLAU/TFRC/HLA-DMB/  
UNC13D/IL18/TUBB/CSTB/S100A8/LYZ/NME2/CTSA/HLA-DQB1/SLAMF7/TRPM2/QPCT/RHOG/TUBE  
R1/DNAJC5/HSPA6/DDOST/ALOX5/PLEKHO2/MIF/CD300A/CANT1/IQGAP1/CFD/FTH1/STXBP2/PSM  
F2/TCF3/BAX/CD86/VAV1/SEMA4A/TNFSF9/PRKDC/NFKB2/CD2/IL34/FLVCR1/MAD2L2/PSMD2/HI  
2RL1/RRAS/CTLA4/TNFRSF11A/PIR/FSTL3/CD83/BATF2/PLA2G2D/TFE3/PRELID1/LEF1/IRF7/Z  
GLL5/HLA-DRB1/PRNP/HRAS/SYK/HLA-DQA1/STK39/HCK/UNC13D/PGF/IL18/PAG1/S100A8/HLA-  
i1/PSMD2/MAPK3/CD276/HLA-DQB2/CD3E/PAK1/SLC39A10/FPR1/MNDA/THY1/THEMIS2/IRF1/IRF  
PC3/WIPF1/PSMB2/SH2B2/ZC3H12A/PSME3/ACTG1/NCKAP1L/HLA-DQA2/MYO1G/SHC1/PIK3CD/PI  
NAP1L1/CCT5/EZH2/EXOSC4/C1orf80/DNMT1/APOBEC3B/ALYREF/EME1/CDKN2D/ANKRD1/CDC7/  
MCE2/POLR2G/PCNA/MCRS1/XRCC2/CHAF1A/ACTL6A/XRCC3/TICRR/PARPBP/NPLOC4/CSNK1E/RFC  
RBL1/MCRS1/CHAF1A/SMARCA4/ACTL6A/LMNA/HDAC1/PRMT2/DDX11/LEF1/NELFE/RPS6KA4/FBL/  
DDX49/RRP9/WDR77/POLR3K/RNPS1/ERI3/REXO4/RRP1/RRP7A/PA2G4/NELFE/SNRPE/POLR2H/FE  
TF4/RPL10L/ITGA2/RPS5/RPS21/MRPL12/RPL7/EIF3I/RPL28/MRPS34/TRMT112/EIF2S3/DENR/  
CAMP5/SCRN1/VAT1/PLEK/MVP/RAB31/SYK/HCK/UNC13D/CD109/TUBB/CSTB/TMSB4X/TAGLN2/S1  
G/TYMP/TRPM2/SCRIB/RHOG/CRMP1/PLAU/DOK2/HMGB2/CCL5/SLC12A2/VAV1/CXCR4/SEMA4A/CC  
IF385A/ARID3A/CDC7/CHEK1/NPAS2/HSF1/RHNO1/NABP2/PRMT1/MCM5/DDIT3/AP5Z1/PSMD14/HM  
i/MAPRE1/TUBB/MAD2L1/ASPM/EZR/MID1IP1/IFT57/TUBB4B/KIF12/CHEK1/RASSF7/RAN/TMEM2C  
IAD2L1/MUC1/EME1/CDKN2D/ZNF385A/ARID3A/CDC7/SCRIB/TUBB4B/CHEK1/HSF1/NABP2/PRMT1/  
AMB1/NME1/ARNT2/HRAS/SYK/NAP1L1/HCK/PGF/DDR1/IL18/EZH2/CDK4/NME2/DNMT1/CSF1R/PI  
SM2/PQBP1/THOC5/SRSF12/PRCC/ISY1/THOC6/RNF113A/PTBP3/EIF4A3/PRPF3/SNU13/SRRT/TI  
SMA5/DNAJB2/TAF9/POMT2/PSMD13/PSMC4/GSK3A/OSBPL7/PML/ANAPC11/UBE2D1/USP14/PSMD1  
GTSE1/SPAG5/MAPRE1/TUBB/EZH2/CDC25A/CDK4/GIT1/MAD2L1/MUC1/CDKN2D/ZNF385A/ARID3A  
RIM28/RHOC/ESPL1/BAX/SIRT6/CCL26/MSN/ARPC4/SH3PX2B/HIF1A/MAPK3/LCP1/DKC1/PAK1/  
/PLEKHG2/CCL5/BAX/BRMS1/VAV1/STK17A/BEX3/CASP2/UBE2M/UBE2Z/PRKDC/SLC9A1/TNFAIP8  
GA5/SELPLG/VPS37C/MSN/IQGAP1/HAVCR1/CREB3/MAPK3/HSPA8/TRIM11/EIF3B/RPL36A/UBE2I  
:/PELO/PABPC1/PUF60/WDR77/RNPS1/PSMB2/PPARD/NELFE/SNRPE/POLR2H/ZC3H12A/TXNL4A/PS  
SET/SMARCB1/SMYD3/KMT5C/PADI2/UBE2E1/RUVBL2/POLE4/SAP30/PRKD2/UBE2A/USP22/JADE2  
CSF3R/MUC1/CASP4/IFNGR2/TNFRSF11B/HLA-DQB1/MMP1/SCRIB/IFI30/CFL1/PSMB9/HLA-DPA1  
FUND1/HIF1A/HSPA8/FZD1/LCP1/MMP10/MAP1S/MRPL17/SHARPIN/CAPN10/FGFR4/MMP2/SMARC  
UTP14A/RPL7/EIF3I/NPM3/TAF9/TRMT112/EIF2S3/SRSF12/DENR/NSUN5/MPHOSPH6/EDC3/ISY1  
i1/TRPM2/RHOG/FMNL1/PLEK2/CFL1/MICALL2/RHOQ/S100A10/EPB41L2/DTNBP1/GPD1L/FSCN1/W  
PC2/DYNLL1/DYNC1H1/PPP1R9B/CSNK1E/E2F4/TMEM237/ABLIM2/SLC9A3R1/SNX10/CEP89/CCNC  
PLEK2/CFL1/MICALL2/RHOQ/S100A10/EPB41L2/DTNBP1/FSCN1/WIPF3/LIMK2/CARMIL1/WASF2/  
A/TNFSF9/PRKDC/CD2/IL34/FLVCR1/PSMD2/HIF1A/JMJD6/CD3E/TCIRG1/ATP6AP1/SASH3/ISG1  
K3CD/HCLS1/JAG1/MITF/LYN/CBFB/CDKN1C/PIAS3/PTPN6/THOC5/IFI16/PML/CCR1/LYAR/OSTM  
/IL18/PAG1/ADAM15/MUC1/COL16A1/C2CD4A/FZD7/TNFAIP8L2/VTCN1/PLAU/S100A10/TFRC/HL  
CLTA/UBE2Z/MAD2L2/PSMD2/NUPR1/HSPA8/OAZ1/RHBDF1/TCIRG1/RNF34/UBE2I/RNF19B/SHARF  
RE1/TMSB4X/CSF1R/HDAC7/ADAM15/SMIM22/CD151/COL3A1/GRN/TNFAIP6/GLIPR2/MGAT5/PLAU  
2/TWF2/MAPK8IP2/CSF1R/ASAP1/NECTIN1/UNC5B/EZR/BSG/ANKRD1/DCDC2/TRPV2/SCRIB/CTNN

WASF2/P3H1/RABEP2/CXCR4/SEMA4A/MAP2/BRSK1/IQGAP1/PTK7/EFNA5/SF3A2/FZD1/PAK1/CRA  
RIM59/SOCS1/COPS9/RPS2/HSP90AB1/TSPAN17/NUP93/NUP205/NUP37/PSMB2/NDC1/NUP188/SV  
SLC7A11/SCAMP5/B3GAT3/PRNP/ADAM9/HRAS/SYK/ABHD17C/NUP62/GTSE1/GPC1/CCT5/TMSB4X/  
NUTF2/FAM83D/TCTN2/VPS37C/MSN/GPAA1/SEC61A1/CARD10/STIL/GBP2/HSPA8/RPL36A/MICAL  
X12/MID1IP1/SNRPD2/GBP5/HSF1/MICALL2/MCM5/HLA-DMB/TRAF2/HNF1B/CENPL/HMGB2/TRIMC  
ID2/HIF1A/NUPR1/LSM4/HSPA8/NT5C/RPL36A/ACOT7/DKC1/PPP2R1A/NPM1/UPF3B/RNASET2/POI  
61A/UTP18/RPS21/UTP14A/RPL7/NPM3/POP1/TAF9/CPSF1/TRMT112/NSUN5/SIRT7/TRMT6/MPHC  
:/TIMP2/SYNGR1/CCL5/DNAJC5/HSPA6/DDOST/ALOX5/PLEKHO2/MIF/CD300A/CANT1/IQGAP1/CFL  
NBL1/HRAS/PLCB1/STK39/GTSE1/PGF/MAPRE1/TMSB4X/CSF1R/HDAC7/ADAM15/SMIM22/CD151/C  
BDKRB1/CCL5/CXCR4/SEMA4A/CCL26/PHPT1/ITGA5/ZP3/IQGAP1/SRPX2/CREB3/HIF1A/RAB25/M  
EBI3/JMJD6/CD276/LCP1/EFNB1/JAML/CD3E/TCIRG1/PAK1/SASH3/TNFRSF4/THY1/SIRPA/SOCS  
:/TIMP2/SYNGR1/CCL5/DNAJC5/HSPA6/DDOST/ALOX5/PLEKHO2/MIF/CD300A/CANT1/IQGAP1/CFL  
G/TYMP/TRPM2/SCRIB/RHOG/CRMP1/PLAU/DOK2/HMGB2/CCL5/SLC12A2/VAV1/CXCR4/SEMA4A/CC  
/RPSA/DAPK3/ATF4/RPL10L/ITGA2/RPS5/RPS21/MRPL12/RPL7/EIF3I/RPL28/MRPS34/TRMT112  
/VAV1/STK17A/BEX3/CASP2/UBE2M/UBE2Z/PRKDC/SLC9A1/TNFAIP8/NUPR1/PPP2R1A/PEA15/CA  
/MUC1/UNC5B/CDKN2D/ZNF385A/PRAME/VTCN1/CREB3L1/COMP/GRN/RPS6KA1/HSF1/CFL1/TNFRS  
/VAV1/STK17A/BEX3/CASP2/UBE2M/UBE2Z/PRKDC/SLC9A1/TNFAIP8/NUPR1/PPP2R1A/PEA15/CA  
/MUC1/UNC5B/CDKN2D/ZNF385A/PRAME/VTCN1/CREB3L1/COMP/GRN/RPS6KA1/HSF1/CFL1/TNFRS  
ML/ANAPC11/UBE2D1/USP14/PSMD10/PSMD11/PSMD1/PSMA7/UBE2E1/FBXL6/DNAJC10/PSMB3/UE  
:/MMP1/RHOG/PLEK2/GBP5/HSF1/RHOQ/S100A10/FSCN1/HNF1B/CARMIL1/CHMP4B/WASF2/RHOC/F  
HY1/FCHSD1/BMF/HGS/BIN1/F2RL1/ARPC2/DYNLL1/DYNC1H1/ARPC3/LIMCH1/SUB1/EPHB3/CORC  
R4/NUP210/ITGA5/SELPLG/VPS37C/MSN/IQGAP1/HAVCR1/CREB3/MAPK3/HSPA8/TRIM11/EIF3B/  
CCL5/BAX/CD86/CXCR4/NUP210/ITGA5/SELPLG/VPS37C/MSN/IQGAP1/HAVCR1/CREB3/MAPK3/HS  
ACGAP1/PTAFR/NCAPH/FANCD2/NDRG3/PLCB1/NUP62/CCT5/PGF/DDR1/MAPK8IP2/PTHLH/ASPM/E  
SE1/MAPRE1/TUBB/EZH2/CDC25A/CDK4/MAD2L1/MUC1/CDKN2D/ZNF385A/ARID3A/CDC7/TUBB4B/  
K/MVP/RAB31/SYK/HCK/UNC13D/CD109/TUBB/CSTB/TMSB4X/TAGLN2/S100A8/LYZ/GIT1/NME2/F  
EC3B/ADAM15/MUC1/CASP4/IFNGR2/RNASE6/HLA-DQB1/SLAMF7/SCRIB/IFI30/HMGB3/SLC26A6/  
D1/PSMB2/IRF7/PSME3/TNIP2/LAG3/FLOT1/SMPDL3B/ADAM8/NONO/ULBP2/NLRC5/PLSCR1/CD2C  
UNC13D/IL18/EZH2/NME2/TWF2/ASPM/METRNL/ANKRD1/ZNF385A/TRPV2/GRN/RPS6KA1/CD53/GL  
10/PCBP4/CASP2/BRSK1/GMNN/MIIP/WDR76/PRKDC/RRAGD/MAD2L2/CNOT11/PSMD2/NUPR1/RRAC  
GED1/NCF1/DTNBP1/TRAF2/CCL5/MAPKAPK2/CXCR4/MIF/CD300A/IQGAP1/CARD10/EFNA5/RGS14  
-DMB/TNFRSF18/VSIG4/JAK3/TCF3/CCL5/BAX/CD86/APBB1IP/VAV1/DDOST/SEMA4A/TNFSF9/MI  
PAG5/MX2/C11orf80/MAD2L1/ASPM/MTFP1/EME1/CHEK1/RAN/HSF1/KIF18A/PSMC3IP/CHMP4B/E  
CD86/VAV1/SEMA4A/TNFSF9/PRKDC/NFKB2/CD2/IL34/FLVCR1/PSMD2/HIF1A/JMJD6/MAPK3/CD3  
N/BRSK1/PTK7/STIL/PSMD2/HIF1A/ITGAX/FZD1/ST14/PAK1/PRKX/LAMA5/MLLT3/IFT52/STAT1  
CD86/VAV1/TNFSF9/MIF/CD300A/FLOT2/ZP3/HLA-DPB1/CD2/STXBP2/EBI3/MAD2L2/CD276/EFN  
BDKRB1/CCL5/SLC12A2/VAV1/CXCR4/CCL26/ITGA5/MIF/CD300A/SELPLG/MSN/ZP3/CD2/CREB3/M  
:/MAD2L1/DNMT1/ASAP1/MID1IP1/CHEK1/HSF1/CRMP1/LINGO1/CARMIL1/CHMP4B/WASF2/ESPL1/  
ADORA1/ADAM9/NBL1/HRAS/PLCB1/STK39/GTSE1/PGF/MAPRE1/TMSB4X/CSF1R/HDAC7/ADAM15/S  
/CCL5/CXCR4/SEMA4A/CCL26/PHPT1/MAP2/ITGA5/ZP3/IQGAP1/SRPX2/CREB3/HIF1A/RAB25/M  
PIF1/STK39/NUP62/IL18/EZH2/CDC25A/CDK4/MAD2L1/DLG3/CSF1R/CDKN2D/MAGED1/NCF1/DTN  
CARD9/RANGAP1/S100A10/TRAF2/PSMD14/HMGB2/RHOC/RABEP2/CCL5/BAX/VAV1/CCL26/CD300A  
/CARMIL1/CHMP4B/WASF2/RHOC/PLEKHG2/CCL26/PHPT1/MAP2/ARPC4/SH3PXD2B/SLC9A1/EFNA5  
/DTNBP1/AREG/CHMP4B/HMOX1/ESPL1/DNAJC5/TRAPPC4/FAM83D/MAP2/CD300A/TCTN2/BRSK1/F  
2/HIF1A/SYT8/MAP1S/CENPE/ATP6AP1/NPM1/CHMP4C/STX1A/PPP6R1/DYNC1H1/SPDL1/MYO19/T  
3A1/TYMP/ANKRD1/ESRP1/TRPV2/GRN/CRMP1/CFL1/BHLHE41/LINGO1/HMGB2/TIMP2/TCF3/P3H1  
FZD1/PAK1/CRAP2/ANKRD27/NRCAM/XRCC2/BIN1/HDAC1/RELN/CSNK1E/S100B/MARK2/GDI1/EF  
NME2/TWF2/ASAP1/PTHLH/ASPM/COL3A1/ANKRD1/ESRP1/TRPV2/GRN/CRMP1/CFL1/S100A10/BHL  
GTSE1/GPC1/CCT5/UNC13D/SPAG5/MX2/GIT1/EZR/SCRIB/RHOG/RAN/GLIS2/RAB11FIP5/ANXA13  
:/NUP62/HCK/NME2/MAPK8IP2/MAD2L1/DNMT1/CSF1R/FOXQ1/MUC1/UNC5B/CDKN2D/ZNF385A/PRA  
IMP4B/SYNGR1/BAX/COL5A1/TRAPPC4/CXCR4/MFGE8/CD300A/FLOT2/CLTA/ARPC4/SLC9A1/CD2/F

IARPIN/ISG15/BRCA1/NSMCE2/STX1A/PCNA/MED10/MCRS1/TRIM59/HGS/ACTL6A/SOCS1/COPS9/MSN/MRT04/SH3PXD2B/STIL/SSNA1/NUPR1/LSM4/LCP1/CENPE/PPP2R1A/NPM1/CHMP4C/LAMA5/EHHC7/SH3PXD2B/SSNA1/RPL36A/MICALL1/AP4M1/PAK1/PDZD11/LAMA5/STX1A/THY1/BMF/RAB3E/MIF/PRDX1/WDR76/PRKDC/CREB3/MAD2L2/HIF1A/MAPK3/NUPR1/MANF/HSPA8/FZD1/MAP2K2/PA1/MID1IP1/COMP/PLOD1/KIF18A/CFL1/MICALL2/RHOQ/S100A10/FSCN1/CARMIL1/WASF2/RHOC/F18/PAG1/S100A8/DLG3/NECTIN1/PAK3/EZR/BSG/SCRIB/CTNND2/TNFAIP8L2/VTCN1/COMP/TFRC1/DYNC1H1/PPP1R9B/CSNK1E/E2F4/TMEM237/ABLIM2/SLC9A3R1/SNX10/CEP89/CCNO/UNC119B/P3H1/RABEP2/CXCR4/SEMA4A/MAP2/BRSK1/IQGAP1/PTK7/EFNA5/SF3A2/FZD1/PAK1/CRABP2/P4/CASP2/BRSK1/MIIP/PRKDC/SSNA1/MAD2L2/CNOT11/PSMD2/CENPE/PPP2R1A/NPM1/CHMP4C/BF11/MISP/ECT2/NUSAP1/CCNF/TTK/TGFB1/RAD51/IQGAP3/RCC2/AURKA/GPNMB/UNC119/PSRC1/HMT2B/HCLS1/FANCA/JAG1/MITF/LYN/CARD11/CBFB/PSMB4/PIAS3/IL2RA/PSMB8/NFAM1/PSMB10/CCT3/SAE1/TRIM28/NUTF2/MAP2/MTCL1/MSN/PKDC/IQGAP1/CARD10/OAZ1/LCP1/DKC1/PAK1/MHRAS/PLCB1/STK39/GTSE1/PGF/MAPRE1/TMSB4X/CSF1R/HDAC7/ADAM15/SMIM22/CD151/COL3A1/CXCR4/SEMA4A/CCL26/PHPT1/ITGA5/ZP3/IQGAP1/SRPX2/CREB3/HIF1A/RAB25/MAPK3/ITGAX/ITDDX41/SF3A3/CPSF4/POLR2K/DNAJC8/FUS/CWC27/SNRPG/RBM17/HNRNPM/KHDRBS1/HNRNPA3/FDDX41/SF3A3/CPSF4/POLR2K/DNAJC8/FUS/CWC27/SNRPG/RBM17/HNRNPM/KHDRBS1/HNRNPA3/FDDX41/SF3A3/CPSF4/POLR2K/DNAJC8/FUS/CWC27/SNRPG/RBM17/HNRNPM/KHDRBS1/HNRNPA3/FM8/ADSL/PMAIP1/LDHA/ITGA2/PSMB4/PSMB8/PSMB10/GNB1/PSMA5/LOXL2/TGFB2/DNMT3A/PSMCHIT1/PSMD14/TIMP2/SYNGR1/HMOX1/DNAJC5/HSPA6/DDOST/ALOX5/PLEKH02/MIF/CD300A/CANFLOT2/ZP3/HLA-DPB1/CD2/STXBP2/EBI3/MAD2L2/CD276/EFNB1/IL27RA/CD3E/PAK1/SASH3/TNINC93B1/PSMD2/MAPK3/CD276/HLA-DQB2/CD3E/PAK1/SLC39A10/FPR1/MNDA/THY1/THEMIS2/IRFPQBP1/THOC5/SRSF12/PRCC/ISY1/THOC6/RNF113A/PTBP3/CPSF6/EIF4A3/CDK7/PRPF3/SNU13/PP1CC/NUP43/PML/AGFG1/THOC6/RAE1/CPSF6/EIF4A3/XPO5/BARD1/BAG3/NUP155/CALR/CPSF4SH3/THY1/SIRPA/SOCS1/IRF1/CTLA4/CD83/PLA2G2D/PDCD1/ZC3H12A/LAG3/SIRPG/TSTA3/NCKi/RAB15/SH2D3A/RAB25/RIT1/RRAGC/RFXANK/DOK3/GNA12/ADGRG1/RASGEF1A/RAP2B/ARHGAP9/H/NUP188/ZC3H12A/PSME3/NCBP2/BCL3/EIF3D/CNOT9/DAPK3/ATF4/SLC11A1/ITGA2/PSMB4/MEi1/SPDL1/XRCC3/TICRR/E2F8/PRMT2/E2F4/PSMB2/CBX3/PSME3/BLM/FBX05/CNOT9/EVI2B/CDKNDLR/HDAC2/RAP1GAP2/YWHAH/CAMSAP2/KDM1A/LYN/FKBP4/MYLIP/RAP2A/CDK5/CTTN/SPOCK1/FAX/LAMC2/LCP1/MMP10/SERPINE1/FGFR4/LAMA5/MMP2/ITGB5/FMOD/PLOD2/PLOD3/BCL3/FERMTSEMA4A/CCL26/ITGA5/ZP3/IQGAP1/SRPX2/CREB3/HIF1A/RAB25/MAPK3/ITGAX/LAMC2/P2RY6/SCAPZB/SMARCC1/CHMP1A/SWAP70/SH3GL1/KATNB1/RPL23/GADD45GIP1/WDR1/MRPL10/IGF1R/MCT4/PNKP/OTUB1/FBX05/NOC2L/KDM1A/CCT7/AKAP8L/IL1B/TCP1/SFPQ/ATAD2/PML/DYNC1L11/R01B/HIP1R/BID/TPPP3/NCKAP1L/TUBB4A/CAPZA1/RANGRF/CXCL13/MKKS/KIF14/FHOD3/CAMSAAD3B/CHIT1/PSMD14/TIMP2/SYNGR1/HMOX1/DNAJC5/HSPA6/DDOST/ALOX5/PLEKH02/MIF/CD30CJC5/HSPA6/DDOST/ALOX5/PLEKH02/MIF/CD300A/CANT1/IQGAP1/CFD/FTH1/STXBP2/PSMD2/ITCSE1/MAPRE1/TUBB/EZH2/CDC25A/CDK4/MAD2L1/MUC1/CDKN2D/ZNF385A/ARID3A/CDC7/TUBB4B/90AB1/DYNC1H1/XRCC3/TGFA/E2F8/DDX11/E2F4/FGFR1/GPSM2/FBX05/DBF4/CNOT9/EVI2B/CDKIUP85/BANF1/PPP1CC/NUP43/PML/AGFG1/THOC6/RAE1/CPSF6/EIF4A3/XPO5/BARD1/BAG3/NUP1EKA3/SPC25/RACGAP1/CENPW/ARHGEF2/NCAPH/REEP4/OIP5/KIF11/NUP62/RCC1/SPAG5/PGF/MAFPAK1/PEA15/SPRED1/FPR1/THY1/HGS/CKS1B/HSP90AB1/NPFFR2/TGFA/TNFRSF11A/FGFR1/CCNA/NUPR1/SERPINE1/CD3E/RNF34/PPP2R1A/PERP/PEA15/SLC35F6/BRCA1/BCL2L12/BMF/NOL3/LAPZA1/RANGRF/MKKS/FHOD3/CAMSAP2/HCLS1/TESK1/ITGB1BP1/ARPC5L/FKBP4/RAC1/CD47/CTIIB3/BARD1/AGO2/CPSF4/PSMD4/PSMD3/PABPC4/PSMD7/VIM/TRIM71/RBM17/PLEKHN1/HNRNPM/KFBID/CCT4/BCAP31/UBE2J2/GPSM2/NPEPPS/RANGRF/YWHAH/HCLS1/BBC3/PMAIP1/CCT7/ITGB1BFDMD/VIL1/AP2M1/RAB10/TNIK/STAC3/ACSL3/PRKCI/STX4/RACK1/MY05A/EPB41L3/PACS2/CLIP3PAG5/C11orf80/MAD2L1/ASPM/EME1/CHEK1/RAN/HSF1/KIF18A/PSMC3IP/CHMP4B/ESPL1/LCMT1IPF1/PSMB2/SH2B2/ZC3H12A/PSME3/ACTG1/NCKAP1L/HLA-DQA2/MY01G/PIK3CD/PLSCR1/CD209PL7/RPL28/PSMB10/PSMA5/POP1/LSM2/PSMD13/PSMC4/RPL39/EDC3/RPL35A/SET/PSMD10/PSM35A/SET/PSMD10/PSMD11/EIF4A3/PSMD1/PSMA7/EXOSC5/YWHAB/RPS3/SAMD4B/PSMB3/RPL27/F01C/BIN1/COR07/F2RL1/ARPC2/GAS7/PPP1R9B/ARPC3/WIPF1/LIMCH1/PDLIM3/COR01B/HIP1R/i1/FBX05/NOC2L/TUBB4A/CAPZA1/MKKS/FHOD3/CAMSAP2/TBC1D30/KDM1A/FKBP4/MYADM/WAS/VI

H3B/SIRPA/SOCS1/IRF1/CTLA4/FSTL3/CD83/PLA2G2D/C1QTNF1/EPHB3/ZNF703/LEF1/PDCD1/ITGA2/MIEN1/RNF157/PLXND1/VIL1/NDRG4/TUBB2B/DVL2/PFN1/LRP8/CROCC/RALA/CDC42/KAP1/E2F4/PPP1CA/CORO1B/HIP1R/SLC9A3R1/MT3/NCKAP1L/CAPZA1/RAP1GAP2/MKKS/FHOD3/SNFB36/EIF4A3/ISG20/EXOSC5/SNU13/SRRT/RPL27/FTSJ3/DROSHA/AGO2/CPSF4/RPL35/KTI12/DDX18/ADSL/ATF4/PMAIP1/LDHA/ITGA2/PSMB4/PSMB8/PSMB10/GNB1/PSMA5/LOXL2/TGFB2/DNMT3A3H12A/DYNLT1/LAMP3/TRIM31/HDAC2/ARHGDIB/SNF8/PLSCR1/NELFB/IL1B/IL2RA/APOBEC3G/FNIP2/SIRPG/NCKAP1L/ADAM8/CCL2/HSPH1/CD209/LYN/CARD11/RAC1/CBFB/IL1B/IL2RA/CD47/CCT4/PNKP/OTUB1/BLM/FBXO5/DBF4/GTPBP4/AUNIP/CDK2/KDM1A/CCT7/EHMT2/RAC1/TCP1/WASPAK1/SASH3/TNFRSF4/SLC39A10/MNDA/THY1/SIRPA/SOCS1/IRF1/CTLA4/CD83/PLA2G2D/PRELI1E2/PCNA/UBASH3B/CCT2/HSP90AB1/XRCC3/TNFRSF11A/RFC2/CCT4/SNX10/PNKP/BLM/ACTG1/AL3/PAM/MT3/NPEPPS/ADAM8/ADSL/HDAC2/ATF4/PMAIP1/LDHA/ITGA2/PSMB4/PSMB8/PSMB10/GNE3/ACSL3/RPL27/SSR3/PRKCI/RPL35/RPS20/RPL18A/GZMB/PDCD5/RPS19/RPLP0/RPL18/ICMT/SLMIIP/PRKDC/SSNA1/MAD2L2/CNOT11/PSMD2/CENPE/PPP2R1A/CHMP4C/BRCA1/RBL1/NSMCE2/PCYOU1/PRELI1D/PPP1CA/FGFR1/HIP1R/PSME3/SLC9A3R1/BID/BCAP31/NOC2L/PRR7/NONO/DAPK3KAP1L/ADAM8/CCL2/HSPH1/CD209/LYN/CARD11/RAC1/CBFB/IL1B/IL2RA/CD47/TNFSF13B/FGR/PTP4/CDK2/DTT1/NASP/LIG1/PRIM1/EHMT2/RAC1/SSRP1/WDHD1/SET/DONSON/TIPIN/POLE4/RBBF1/NAA10/SGO2/MAD2L2/RGS14/CENPE/UBE2I/PPP2R1A/CHMP4C/BRCA1/NSMCE2/SGO1/MSTO1/DYR/KNTC1/E2F8/DDIAS/PRMT2/E2F4/PSMB2/PSME3/SLC9A3R1/BLM/FBXO5/CNOT9/CDKN2B/CCL2/PTP4/SIRPG/NCKAP1L/ADAM8/CCL2/FANCA/HSPH1/CD209/LYN/CARD11/RAC1/CBFB/IL1B/IL2RA/CD47/RAC1/CTTN/MYADM/WAS/VIL1/CHMP3/PFN1/WASF1/INPP5J/TUBG2/RPS3/CAPZB/GRB2/ZNF207/CD209/LYN/CARD11/IL1B/IL2RA/TNFSF13B/PSMB10/PTPN6/IL12RB1/IMPDH2/CD79A/LST1/IL15/PTP0/NOC4L/RRP7BP/TSR3/UTP11/LAS1L/MRPL10/CUL4B/UTP4/MYBBP1A/RPL38/RPL23A/EXOSC3/PTL9/CXCL3/CXCL13/LYN/CCL28/RAC1/PLA2G7/IL1B/BCAR1/CXCR3/CCL4/TGFB2/GPSM3/NUP85/CCT4/CTLA4/PLA2G2D/LEF1/NCKAP1L/SLC11A1/CD209/LYN/CARD11/IL1B/IL2RA/TNFSF13B/PSMB10/PTP4/NCKAP1L/ADAM8/CCL2/HSPH1/CD209/LYN/CCL28/CARD11/RAC1/CBFB/IL1B/IL2RA/CD47/TN/PTP/ERO1A/GPX1/PYCR2/RPS3/DPEP1/CBX8/PCGF2/MAPK7/PPP5C/AXL/BTK/STK25/RACK1/ROMO1/MYI/SFPQ/PARP1/MSH2/RUVBL2/MCM8/SWAP70/XRCC6/POLQ/FUS/RAD21/RFWD3/NABP1/XRCC4/RPA2/PTP3D1/KATNB1/IGBP1/COPG1/NDE1/MAPT/BICDL2/TTC26/HSPB11/RHOT2/ACTR3/IFT172/COPG2/PTP107/CETN2/SLC35C1/SLBP/KHDRBS1/HNRNPA3/CKAP5/CHTOP/SEC13/SLC25A5/SYMPK/CPSF3/FNOC4L/RRP7BP/GTF3C1/TSR3/UTP11/NIFK/LAS1L/UTP4/MAPT/EXOSC3/NAT10/UTP6/HEATR1/SAFIBD3/TSN/MORF4L2/MECP2/TARBP2/BAZ2A/POLR2I/POLR2J/PPLN1/POLR2D/DHX9/SMARCA5/CNCPT4/NUP107/AP3D1/RALB/SLBP/TTC26/HSPB11/MZT1/CHTOP/SEC13/SYMPK/STX7/CPSF3/IFT172/PTP83/EXOSC3/MFNG/HSPD1/LFNG/ABL1/FCGR2B/TNFAIP3/BAD/VCAM1/PTPN2/ADAM17/CASP8/NBN/PTP4/CSNK1D/CDK2/KIF14/DCTN2/AKAP8L/PSMB4/PSMB8/PSMB10/PSMA5/PSMD13/PSMC4/HAUS8/CITPTBFB/IL1B/IL2RA/CD47/TNFSF13B/LCK/PTPN6/CD27/IL12RB1/IL15/MSH2/RPS3/GRB2/CD6/CDCPTLCK/IFI16/PML/E2F2/PARP1/ERO1A/CRIP1/GPX1/MSH2/RPS3/DNAJC10/DNM1L/MAPK7/PPP1R15/ISR1/SLC11A1/RAB20/LYN/RAC1/ITGA2/ANXA11/IL1B/ACTB/CD47/FGR/CD300LF/WAS/LYAR/IL1PTDK7/MSH2/ZBTB17/TFAP4/BARD1/CALR/MED25/PPP1R15A/MTBP/RPL23/GADD45GIP1/MYBBP1A/FNLC11A1/CD209/DCTN2/HLA-DRB5/DCTN5/PSMB4/CTSS/PSMB8/KIF15/PSMB10/PSMA5/WAS/PSMD1PTMCTS1/PRPF19/MRPS7/PTGES3/TRAFF7/MPV17L2/SART1/SRPK1/RPS23/RPS10/DDX23/EIF3K/HSFPT2/MED25/RBX1/GMFG/ABI2/CLEC7A/RACK1/RPA2/CUL4B/DRG1/MAPT/ARPC1A/BRK1/ARPC5/VCP/PTKKN2B/CCL2/CDK2/LSM10/KIF14/NASP/PRIM1/PTPN6/PML/CDKN2C/CDK7/CCND2/POLE4/POLA1/MPTLYN/CARD11/IL1B/IL2RA/TNFSF13B/PSMB10/PTPN6/IL12RB1/IMPDH2/CD79A/LST1/IL15/RPS3PTIOTCH1/HOXA5/THRA/VEGFA/SMAP1/IL20RB/SLC39A3/SRF/INHA/BPGM/KITLG/DOCK10/MAEA/LDEPTPTPN6/PSMD13/PSMC4/CD79A/PSMD10/PSMD11/PSMD1/PSMA7/RPS3/PRKD2/PSMB3/PSMD4/PSMD3PTFNG/HSPA2/RAD51D/EME2/ACTR3/RAD1/SPIRE1/NBN/SYCE1L/ERCC1/CCNE2/MASTLPTPT/SSRP1/MTA2/CDK5/MAPK11/TAF9/IFI16/PML/E2F2/PSMD10/MSH2/CHD4/TFAP4/RBBP4/BARD1/PTDBF4/CNOT9/CDK2/LSM10/KIF14/RAB11FIP4/IL1B/SFPQ/POC1A/PML/DYNC1LI1/CIT/PLK4/ANAPT2/CENPE/PPP2R1A/CHMP4C/NSMCE2/SGO1/MSTO1/SPDL1/XRCC3/TGFA/RRS1/KNTC1/PPP1R9B/CEPTRB2/CDC42/PSMD4/HOXB7/PSMD3/PSMD7/MSX1/SEMA3C/TFAP2A/WNT4/MED12/PSMD8/ACVR1/ABLPPT2/LSM10/KIF14/NASP/PRIM1/PTPN6/PML/CDKN2C/CDK7/CCND2/POLE4/POLA1/MCM8/PRIM2/MTE

4/DCTN2/PSMB4/PSMB8/PSMB10/PSMA5/PSMD13/PSMC4/HAUS8/CIT/PLK4/PSMD10/PSMD11/NES/  
 TMEM64/NKAP/INHA/RBPJ/EPHA2/KITLG/CCL19/NOTCH2  
 CDC42EP2/GMFG/ABI2/WDR1/ARPC1A/BRK1/ARPC5/ACTR3/DBNL/SPIRE1/ADD3/LIMA1/ARHG  
 S7/RPL7A/RPS23/RPS10/PTBP1/RPS15/RPS16/USF1/RPL5/RPS27A/RPS12/RPS4X/RPL6/RPL37/  
 TNFSF13B/ADAM19/LCK/PTPN6/CD27/IL12RB1/IL15/PIEZ01/PTPN23/RPS3/GRB2/CD6/CDC4  
 HNRNPU/LTV1/SARNP/MAGOH/THOC2/XPO7/HNRNPA1/EIF5A/POLR2D/DHX9/NXT2/RBM15B/SEH1  
 HNRNPU/LTV1/SARNP/MAGOH/THOC2/XPO7/HNRNPA1/EIF5A/POLR2D/DHX9/NXT2/RBM15B/SEH1  
 LST1/IL15/RPS3/CD6/PPP1R15A/GAL/FADD/BTK/PELI1/RASAL3/GPR183/BTN2A2/ZNF335/FCGR2B  
 PH2/CENPI/BANF1/CENPK/NAP1L4/NAP1L2/PARP1/SET/SMYD3/CHD4/RUVBL2/RBBP4/MCM8/CHMF  
 L23A/MCTS1/PRPF19/MRPS7/PTGES3/TRAFF7/MPV17L2/SART1/VCP/SRPK1/RPS23/RPS10/DDX23/  
 MSTO1/DYNC1H1/SPDL1/XRCC3/RRS1/DDX11/INCENP/NDC1/FBXO5/KIF14/KPNB1/SMC4/KNS1  
 FN1/WASF1/TACSTD2/CAPZB/GRB2/FHOD1/CDC42/ARHGAP18/TGFB3/SWAP70/CDC42EP2/GMFG/AE  
 CL2/CDK2/PSMB4/PSMB8/PSMB10/PSMA5/PSMD13/PSMC4/PML/DYNC1LI1/PSMD10/PSMD11/CDKN2  
 D16/PDCD5/FADD/CLEC7A/RACK1/IGBP1/DAP/MAPT/PDCD6/CYCS/CARD18/MTCH1/HSPD1/PIDD1/  
 SFRP2/UBQLN4/CHEK2/HDAC10/SPIRE1/MAGEF1/PIAS4/ERCC1/UIMC1/BCL2L1/UBR5/TWIST1/AF  
 F4/NUP107/CETN2/CCT8/SLBP/KHDRBS1/HNRNPA3/EXOSC3/CKAP5/CHTOP/SEC13/SYMPK/WRAP53  
 D6G/NDE1/CKAP5/ARPC5/NSFL1C/ACTR3/WWC1/HSP90AA1/MPP7/CTNNA1/PTK2/DCTN1/ARHGEF11  
 2RB1/LST1/IL15/RPS3/CD6/PPP1R15A/GAL/FADD/BTK/PELI1/RASAL3/GPR183/BTN2A2/ZNF335  
 2/CD6/CDC42/IL4R/PPP1R15A/IL12RB4/AP3D1/FADD/RASAL3/BTN2A2/HSPD1/SART1/CSK/BAD/BCL10/  
 SMB4/PSMB8/PSMB10/PSMA5/PSMD13/PSMC4/PML/DYNC1LI1/PSMD10/PSMD11/CDKN2C/PSMD1/DC  
 N6/CD27/IL12RB1/IL15/RPS3/GRB2/CD6/CDC42/IL4R/PPP1R15A/IL12RB4/AP3D1/FADD/RASAL3/BTN2  
 C/DONSON/TIPIN/MSH2/ZNF207/TOPBP1/BABAM1/RFWD3/NABP1/RAD9A/RPA2/NAE1/TIMELESS/2  
 S12/RPS4X/RPL6/EXOSC9/EXOSC10/MAGOH/RPL37/RPL27A/DXO/EXOSC7/RPL36/UBA52/NANOS1/  
 S7/RPL7A/WDR55/GAR1/SEN3/RPS15/RPS16/RPL5/NOL6/RPF2/BMT2/POP5/NVL/EXOSC9/EXOSC  
 RP27/CCT8/GENB4/EMC1/NFYC/UBXN1/HSPD1/PTGES3/HSPA2/TBCD/VCP/BAG2/ERP29/HSP90AA1/  
 RPS27A/RPS12/RPS4X/RPL6/RPL37/RPL27A/HSPA5/RPL36/UBA52/ZDHHC23/CACNB3/CDK5R1/F  
 CDC42EP2/GMFG/ABI2/CLIP3/DRG1/MAPT/ARPC1A/BRK1/ARPC5/ABL1/TBCD/STMN2/ACTR3/DBNL/  
 DAP/MAPT/PDCD6/CYCS/MTCH1/HSPD1/PIDD1/VCP/SFRP2/TRADD/BAD/BCL10/TNFSF15/THBS1/  
 RIM25/SUPT5H/CCL3/SRPK1/BAD/NOTCH1/MAVS/OAS3/TRIM21/TARBP2/PSMC3/VPS37B/PIE1/PC  
 5/BAD/PSMA4/PSMD9/CHCHD2/NOTCH1/RPS27A/PLK3/VEGFA/BNIP3L/EGLN2/UBA52/PSMC3/TWIS  
 PN/RBBP7/RPA2/CUL4B/TAF12/CENPQ/CHD1L/HAT1/RPS27A/GTF3C5/ANP32E/THRA/UBTF/MIS18  
 L11/XCL2/CMKLR1/SWAP70/RPS19/WDR1/LBP/CCL3/S100A7/EMILIN1/CXCL17/AKIRIN1/CYP19A  
 4/HAUS8/PLK4/PSMD10/PSMD11/PSMD1/DONSON/ODF2/PSMA7/PSMB3/TOPBP1/APP/PSMD4/CETN2  
 BXO5/KIF14/KPNB1/SMC4/KNSTRN/AKAP8L/NCAPH2/SFPQ/CENPK/DYNC1LI1/DSN1/ANAPC11/TUE  
 RPF19/ESCO2/RAD51C/DNA2/RAD51D/VCP/WRAP53/UBQLN4/DCLRE1B/EME2/CHEK2/SFR1/SPIRE1  
 A/POLR2D/ANP32B/CCHCR1/RBM15B/SEH1L/EIF6/RANBP3/THOC1/DHX38/PKD1/ENY2/PABPN1/SF  
 10/PSMD11/PSMD1/DONSON/ODF2/PSMA7/PSMB3/TOPBP1/APP/PSMD4/CETN2/PSMD3/RBX1/PSMD7  
 CD2  
 CA/CCR1/CXCL16/C5AR1/PADI2/PF4V1/CALR/CXCL11/CCR5/XCL2/CMKLR1/SWAP70/TRPM4/RPS1  
 I/IGBP1/CEP250/CLIP3/DRG1/MAPT/CKAP2/ABL1/TBCD/KLHL42/STMN2/NSFL1C/PRKAA2/TCTEX1  
 PSMD3/PSMD7/LILRB4/IKBK/PTK/EIF2B5/BTN2A2/PSMD8/ABL1/PSMA1/KCNN4/CSK/PSMB5/BCL  
 IAGOH/RITA1/THOC2/XPO7/HNRNPA1/EIF5A/POLR2D/ANP32B/DHX9/CCHCR1/RBM15B/SEH1L/EIF6  
 HNRNPU/LTV1/SARNP/MAGOH/THOC2/XPO7/HNRNPA1/EIF5A/POLR2D/DHX9/NXT2/RBM15B/SEH1  
 HOD1/CDC42/TGFB3/RANBP1/SWAP70/CDC42EP2/KATNB1/GMFG/ABI2/WDR1/DRG1/MAPT/ARPC1A/  
 SMA4/PSMD9/RPS27A/HNRNPU/EXOSC9/EXOSC7/TBHG4/UBA52/NANOS1/PSMC3/EXOSC1/HNRNPR/A  
 IED12/PSMD8/ABL1/PSMA1/SFRP2/PSMB5/PSMA4/TBX2/PSMD9/VEGFA/AP2A2/PSMC3/RHOA/CLTC/  
 RPS12/RPS4X/RPL6/C8orf88/RPL37/RPL27A/COPS5/EIF1AD/RPL36/UBA52/RPL19/RPS11/EIF  
 2A/RPS3/PTPA/ZNF207/CHMP1A/WRAP73/RNF4/HAUS6/DRG1/NTMT1/CKAP5/MZT1/VCP/CHEK2/CC  
 CTSS/PSMB8/KIF15/PSMB10/PSMA5/PSMD13/PSMC4/AP2M1/DYNC1LI1/AP2S1/PSMD10/PSMD11/F  
 DBF4B/PTGES3/DNA2/WRAP53/HSP90AA1/HDAC10/SPIRE1/NBN/NVL/ERCC1/UIMC1/ANXA3/GLI1

:/BECN1/EREG/OSM/CALM3/CIB1/VPS4A/ZNF16/PIN1/EFHC1  
:50/CLIP3/DRG1/MAPT/CKAP2/ABL1/TBCD/STMN2/NSFL1C/PRKAA2/CDK2AP2/CCSAP/DCTN1/FBXW  
'N6/IL12RB1/LST1/IL15/RPS3/CD6/PNP/GAL/FADD/BTK/PELI1/RASAL3/GPR183/BTN2A2/ZNF33  
IC4/AP2M1/DYNC1LI1/AP2S1/PSMD10/PSMD11/PSMD1/KIF2A/HLA-B/PSMA7/PSMB3/CAPZB/CALR/  
'1/ATP7A/RPTOR/ADNP/ADD1/RYK/FSTL4/UCN/SEMA3F/MEGF8/TRIM46/XK/SEMA6B/SEMA4C/PTPF

IC4/AP2M1/DYNC1LI1/AP2S1/PSMD10/PSMD11/PSMD1/KIF2A/HLA-B/PSMA7/PSMB3/CAPZB/CALR/  
IAA1/VCAM1/DCTN1/VPS45/CEP164/HAUS7/CFTR/CTBP2/RAB3A/MARK4/HAUS5/DYNC1I2/RAB11A/  
/ADD3/ARHGAP28/RHOA/MTPN/SPTAN1/ARF1/RHOBTB2/GMFB/HAX1/PREX1/ARFGEF1/ADD1/MYO1C  
'0/ACTN4/RAB27B/FNBP1L/TNPO1/IFT22/SNAPIN/SSX2IP/UXT/HTT/ACTR1A/RAB1A/MYO1C/KIF3  
'DBNL/SPIRE1/ADD3/LIMA1/ARHGAP28/DSTN/PLEKHH2/RHOA/MTPN/SPTAN1/ARF1/RHOBTB2/GMFE  
.1/ACTR3/PSMB5/BCL10/PSMA4/HSP90AA1/PSMD9/PTK2/PAK2/PLD2/PSMC3/WIPF2/RAPGEF1/MAF  
L3/WNT4/BTN2A2/ABL1/CCND3/VCAM1/TWSG1

'U/EXOSC9/DXO/EXOSC7/TBRG4/UBA52/PSMC3/EXOSC1/HNRNPR/ANP32A/DHX9/TNPO1/PSMC5/RBM  
:/PTPN1/PIAS4/MAVS/TLR2/IFNAR2/CDC37/SIGIRR/DHX9/NR1H2/SPATA2/IRAK2/CAV1/PTPRC/Y  
'SNK2A1/RPL5/MBD3/NBN/RPF2/PLK3/PAK1IP1/CSNK2B/TP53RK/CDK5R1/NUAK1/TWIST1/RFC5/F  
'KAPK5/BECN1/UBE2N/ANAPC5/CTBP1/ATR/MORC2/ANAPC4/PAF1/HNRNPD/PHF1/ING2/SETDB1/BF  
.PP/SWAP70/FADD/ECM1/LBP/CCL3/S100A7/EMILIN1/CXCL17/AKIRIN1/CYP19A1/PTGER4/SLC8E  
'TN/HSPA4L/COPS5/HSPA5/CANX/EDEM2/HSPA14/PPP2R5B/GFPT1/TLN1/DAXX/HSPB7/GOSR2/TPF  
'./SPIRE1/ADD3/LIMA1/ARHGAP28/DSTN/PLEKHH2/RHOA/MTPN/SPTAN1/ARF1/RHOBTB2/GMFB/HAX  
'RPS16/USF1/RPL5/RPS27A/RPS12/RPS4X/RPL6/RPL37/RPL27A/TRIM21/RPL36/UBA52/TARBP2/  
'MB5/PSMA4/PSMD9/CSNK2A1/VPS35/SFRP4/TLR2/ATP6AP2/SULF2/UBR5/PSMC3/GSKIP/PSMC5/F  
'IB/POLR2J/POLR2D/DHX9/KPNA6/NELFA/POLR2E/CAV2/SUPT4H1/NELFCD/GTF2F1/CIB1/LARP1/  
'./RPS27A/GTF3C5/THRA/UBTF/MIS18A/UBA52/PIH1D1/PSMC3/BAZ2A/DAXX/SART3/ANP32B/SMAF  
'27A/HNRNPU/NVL/EXOSC10/UBA52/HNRNPA1/RFC5/MAPKAPK5/DNAJC2/POLE3/RPA1/TFDP1/POLE  
'5/CEP164/HAUS7/CFTR/CTBP2/RAB3A/MARK4/HAUS5/DYNC1I2/RAB11A/NEDD1/CENPJ/CC2D2A/V  
'MASTL

INA1/PTPN2/THBS1/STYXL1/CASP8/PIAS4/PAK2/BCL2L1/TPD52L1/PLAGL2/STK3/YWHAG/FAF1/E  
IIS18A/PIH1D1/BAZ2A/DAXX/ACTR5/RNF8/SMARCA5/ZMIZ1/DMAP1/POLE3/ELOF1/SUPT4H1/SRCA  
:/CCNE2/HNRNPA1/RFC5/MAPKAPK5/POLE3/RPA1/SMARCA1/POLE2/ATR/DCLRE1C/HDAC8/TFIP11  
'2/TRAFF4/PSMC3/ADGRG3/RHOA/ACTN4/PSMC5/CCL19/TLR7/LITAF/PSMB1/MAP3K7/PSMB6/COPS5  
'ISC9/EXOSC7/TBRG4/UBA52/PSMC3/EXOSC1/HNRNPR/ANP32A/DHX9/TNPO1/PSMC5/RBM10/MEX3D/  
'TMBIM1/BCL2L1/RAB11A/CACNB3/CDK5R1/YWHAG/CLTC/AP2B1/GPC2/EPHA2/MRAP2/TFDP1

'K2AP1/NBN/CCNE2/ZPR1/STOML2/RFC5/POLE3/RPA1/CDC34/SMARCA1/MSH6/ATG7/RNASEH1/PC

'MN

:/RACK1/ZNF675/CLIP3/PELI3/PSMD8/LIMS1/PSMA1/TNFAIP3/TRADD/PSMB5/PSMA4/PSMD9/TNF  
'./NEK6/CXXC5/UBE2N/CCL19/TMEM106A/LITAF/LPAR1/MAP3K7/TRIM32/VAPA/ATP2C1/CC2D1A/S  
'N1/ANAPC5/EREG/UBE2E2/EGF/RPTOR

'8/ENY2/PABPN1/SRSF1/SRSF2/CASC3/FIP1L1/RBM8A/MAGOHB/MYO1C/SMG7/LRPPRC/POLDIP3/T  
IME6/MSX1/DRG1/WNT4

'N/AKAP8L/NCAPH2/CENPK/DYNC1LI1/DSN1/ANAPC11/TUBG2

'./HNRNPA1/RFC5/MAPKAPK5/POLE3/RPA1/SMARCA1/POLE2/ATR/DCLRE1C/HDAC8/TFIP11/SMG7/  
'2A2/SYNE4/PSMC3/RHOA/IFT20/CLTC/AP2B1/PSMC5/AP2A1

'4/MAVS/IFNAR2/CDC37/SIGIRR/NR1H2/SPATA2/IRAK2/CAV1/PTPRC/YTHDF2/METTL3/VRK2/PPA  
'ARF1/RHOBTB2/GMFB/HAX1/PREX1/ARFGEF1/ADD1/MYO1C/SPIRE2/NCKAP1/PPP1R9A

'7/HINFP/TIPRL/CNOT10/CCAR2/CNOT3/MUS81/TFDP1/ATR/TP53BP1/HMGA2/THOC1/FBXO6

'./SFRP4/AP2A2/RNF213/PSMC3/RHOA/CLTC/AP2B1/PSMC5/AP2A1/RYK/PSMB1/MOV10/MAP3K7/PS



0/STXBP4/CNOT3/TFDP1/UBE2E2/RPTOR/PAGR1/PKD1  
'PIAS4/VDAC2/PTPMT1/TXNDC12/IVNS1ABP/BCL2L1/NDUFA13/PLAGL2/CCAR2/BECN1/PRKRA/CAV  
'NABP1/RAD9A/RPA2/NAE1/ZWILCH/BTG2/PIDD1/DCLRE1B/EME2/CHEK2/CLSPN/NBN/PLK3/ZFYVE

.1/SEH1L/HSPA13/ATR/RPTOR/STUB1/CXCL10/HSBP1L1/ATP2A2

'A2/PARL/TIMM23/TIMM8B/HUWE1/PITRM1/IMMP1L/TIMM9/TIMM22/USP36/NMT1/PAM16/HTRA2/A  
IGA2/THOC1/FBX06

'M8A/MAGOH/SMG7/POLDIP3/THOC7/AAAS/THOC3/HNRNPA2B1/SUPT6H/U2AF1L4/SRSF3/NUP214/

ISFL1C/CHEK2/CCSAP/DCTN1/HNRNPU

'SF1/SRSF2/CASC3/FIP1L1/RBM8A/MAGOH/SMG7/POLDIP3/THOC7/AAAS/THOC3/HNRNPA2B1/SUF

/PMM2/RPL32/RPL30/UBAC2/RPS9/RPS14/RPS27/RPL29/SRP68/TRAM1/RPL13/RPL4/RPL41/RPL  
'OHB/SMG7/POLDIP3/THOC7/AAAS/THOC3/HNRNPA2B1/SUPT6H/U2AF1L4/SRSF3/NUP214/TSC1/IW  
'L/TIMM23/TIMM8B/HUWE1/PITRM1/IMMP1L/TIMM9/TIMM22/USP36/NMT1/PAM16/HTRA2/ARIH2  
A/ANAPC15/TERF1/SUPT6H/KDM3A/CDK5RAP2  
'PSMC5/AP2A1  
9/XCL1/CCL8/TMEM102  
'PSMC5/AP2A1

!'/CYTH3  
'NP32B/SMARCA5/POLE3/IPO4/SMC2/HMGA2/PARP10/GRWD1

l)/RPS9/RPS14/RPS27/RPL29/CASC3/RPL13/RBM8A/MAGOH/RPL4/RPL41/SMG7/RPL9/RPS6/RPL2

.SCC3  
IFSFI3

'U2AF1L4/SRSF3/NUP214/IWS1/DDX19A/TPR/SRSF7/MCM3AP/NUP50

'U2AF1L4/SRSF3/NUP214/IWS1/DDX19A/TPR/SRSF7/MCM3AP/NUP50  
'RP68/TRAM1/RPL13/RPL4/RPL41/RPL9/RPS6/RPL24/RPL11/RPL10/RPS24/RPS3A/RPL14/SRP19

l1/PAF1/HDAC8

'RAM1/RPL13/RPL4/RPL41/RPL9/RPS6/RPL24/RPL11/RPL10/RPS24/RPS3A/RPL14/SRP19/RPL1C

KIF22/CLTC/AP1S1/AP1S3/AP1S2/AP2B1/LGMN/AP2A1/ARF1

CLTC/AP1S1/AP1S3/AP1S2/AP2B1/LGMN/AP2A1/ARF1  
.9/RPS6/RPL24/RPL11/RPL10/RPS24/RPS3A/RPL14/SRP19/RPL10A/RPL12/SRP14/RPS18/RPS28

1S3/AP1S2/AP2B1/LGMN/AP2A1/ARF1

RPL26L1/EIF3C/ZC3H15/RPL31  
B/FCGR1B  
.24/RPL11/RPL10/RPS24/RPS3A/RPL14/SRP19/RPL10A/RPL12/SRP14/RPS18/RPS28/RPS17/RPL

IP1/HAUS2/CDK5RAP2





RAB7B/RRAS/ARHGEF19/GDI1/SH2B2/RAB35/ARFGAP1/RAB24/DYNLT1/GPSM2/CYTH2/FLOT1/ARF  
FYD3/KMT5C/PADI2/UBE2E1/RUVBL2/POLE4/SAP30/PRKD2/UBE2A/USP22/JADE2/KAT2A/BEND3/M  
1/EPHB3/ARFGAP1/TBC1D10B/DYNLT1/DVL3/NCKAP1L/ARHGAP1/CCL2/RTKN/RAP1GAP2/CXCL13/  
KN2D/MAGED1/NCF1/DTNBP1/TNFAIP8L3/TRAF2/CCL5/MAPKAPK2/CXCR4/MIF/CD300A/IQGAP1/C  
IE41/LINGO1/HMGB2/TIMP2/TCF3/P3H1/CXCR4/SEMA4A/MAP2/BRSK1/IQGAP1/PTK7/EFNA5/SF3A  
AC1/RELN/CSNK1E/MARK2/GDI1/NUMBL/FGFR1/DYNLT1/DVL3/VLDLR/CPNE1/HEYL/HDAC2/CSNK1  
8/HLA-DRA/MUC1/HCST/EZR/IFNGR2/COL3A1/HLA-DQB1/SLAMF7/SCRIB/HMGB3/VTCN1/GRN/GBF  
8/MAPK3/MAP2K2/CENPE/UBE2I/DKC1/PAK1/ACD/PEA15/FPR1/SOCS1/CKS1B/CCT2/RPS2/HSP9C  
3/MUC5B/DPAGT1/BGN/IL15/A4GALT/STT3A/GALNT6/FUT2/FUT6/AGO2/MUC20/TMEM258/CHPF/M  
RB2/MTCP1/PRKCI/GRK2/APP/DMPK/MAPK7/BCAR3/VRK1/RACK1/CSNK1G2/STK38/NTMT1/SFRP2/  
CR1/CD209/LYN/CARD11/MUC3A/PSMB4/CTSS/PSMB8/PSMB10/PSMA5/CD300LF/NRAS/SFPQ/PQBF  
/LDOC1/PIM2/HIP1R/BCL3/FLOT1/SRI/GTPBP4/EIF3D/CPNE1/HDAC2/KDM1A/ITGB1BP1/ITGA2/  
GAL/SLC27A4/MYO5A/KRT20/HPSE/S100A7/OVOL2/KDF1/TRADD/KRT10/PSAP/ACVR1B/NOTCH1/U  
:/SFPQ/PQBP1/PSMD13/IFI16/PSMC4/MUC5B/UBE2D1/PSMD10/PSMD11/PSMD1/PSMA7/TRAF3/PSM  
:/MAPK11/PQBP1/XPR1/IFI16/BANF1/MAP3K14/PML/IL12RB1/MST1R/IL15/ILF3/ISG20/BATF3/  
3/NSF/GGA1/RAB3D/STAC/PALM/STX7/CSK/VAMP8/SYS1/VPS35/ARFRP1/OPTN/RAB3A/GGA3/TME  
/MAVS/OAS3/TRIM21/TARBP2/PSMC3/VPS37B/PIIE/POLR2I/PIIB/POLR2J/POLR2D/DHX9/IFITM  
:/PLK3/SH3GLB1/MAVS/EDEM2/ZPR1/RAB29/KIF20B/CACNB3/CDK5R1/UBR5/CACNA1D/VPS11/ATC  
:/VHL/PSMA1/PSMB5/BAD/PSMA4/PSMD9/CHCHD2/NOTCH1/RPS27A/PLK3/VEGFA/BNIP3L/EGLN2/U  
L2/ATP6VOD1/SUV39H2/PSMD8/VHL/PSMA1/PSMB5/BAD/PSMA4/PSMD9/CHCHD2/NOTCH1/RPS27A/  
STX4/SEMA5B/ANGPT2/SEMA3C/GPR183/SEMA3E/LBP/CCL3/S100A7/CXCL17/AKIRIN1/CYP19A1/

'HA2/CCL19/KLF5/HTT/CAV1/ATP7A/DZIP1/PLD1/EVI5L/NCKAP1/PPP1R9A/PLEKHM1/CCDC88A/

'SME3/SLC9A3R1/DVL3/FERMT1/PLEKHA4/FRAT2/DAPK3/CSNK1D/FZD2/AXIN1/NLE1/MITF/WNT7E  
P/PSMB4/GBA/KCTD10/WFS1/UBE2L3/PSMB8/RNF187/PSMB10/PSMA5/DNAJB2/TAF9/PSMD13/PSM  
OAB1/NPLOC4/CSNK1E/MAN1B1/PSMB2/PSME3/HSPBP1/BCAP31/UBE2J2/FBX05/VLDLR/LAMP3/CS  
.4/YWHAH/BBC3/PMAIP1/HCF1/MTFR2/VDAC1/GBA/CDK5/UBE2L3/CTTN/PHB/ZNF205/GSK3A/WDF  
I/NCKAP1L/MLST8/CAPZA1/DAPK3/MKKS/ARHGDI1/FHOD3/HCLS1/TESK1/ITGB1BP1/ARPC5L/RAC1  
'SIRPA/SOCS1/ARPC2/CTLA4/FSTL3/CD83/TFE3/PDCD1/TGM2/FERMT1/SIRPG/FLOT1/NCKAP1L/A  
'MAPK7/BCAR3/VRK1/RACK1/CSNK1G2/STK38/SFRP2/PDCD10/CHEK2/CLSPN/MAPKAPK3/HSP90AA1  
'2D1/PSMD10/PSMD11/PSMD1/PSMA7/TRAF3/PSMB3/ARRB2/MUC20/TLR5/PSMD4/GPATCH3/PSMD3/  
'A/IL4R/PNP/LILRB4/AP3D1/AXL/FADD/BTK/ZNF675/BTN2A2/CCL3/ABL1/SART1/HLA-DOA/FCGF  
'D1/FADD/GPR183/WNT4/BTN2A2/LFNG/ABL1/SART1/HLA-DOA/BAD/PTGER4/PTPN2/ADAM17/TMEM  
'S21/MRPS15/CCSAP/MRPL18/MAP1A/JMJD4/ADD3/LIMA1/ETF1/MRPL37/EIF5A/DSTN/PLEKHH2/M  
'/PIK3R6/HAX1/INPP5D/PTPRC/ZNF16/ACIN1/NFKBID/ANKRD54/CD4/IFNG/ANXA1/PPP2R3C/GNA  
'PJ/CCAR2/EGF/CAV1/ZBED2/PSMB1/PIN1/CSNK1G1/PSMB6/PSMA3/LYPD6/PSMB7/FZD9/WNK1/SM

IS/TRIM56/XRCC5/LILRB1/RNF135/OTUD5/ZBP1/TICAM1

IS/TRIM56/XRCC5/LILRB1/RNF135/OTUD5/ZBP1/TICAM1

:7/TRNAU1AP/NAALADL1/PPP1CA/MRPL9/CPD/PA2G4/ZC3H12A/PAM/NCBP2/EEF1D/ERAP2/BCL3/C  
'SVBP/PSME3/HSPBP1/UBE2J2/NPEPPS/OTUB1/DTX2/FBX05/GTPBP4/PRR7/TRIM31/ANAPC7/SPSE  
P/PSMB4/GBA/KCTD10/WFS1/UBE2L3/PSMB8/RNF187/PSMB10/PSMA5/DNAJB2/TAF9/PSMD13/PSM  
E2J2/FBX05/LAMP3/CSNK1D/ANAPC7/CDK2/KIF14/SPSB1/SNF8/AXIN1/PMAIP1/ADRM1/CCDC22/  
'SME3/SLC9A3R1/DVL3/FERMT1/PLEKHA4/FRAT2/DAPK3/CSNK1D/FZD2/AXIN1/NLE1/MITF/WNT7E  
UCY2C/PGK1/CHST4/PIGS/ALG3/MGAT5/ATIC/JAK3/DDOST/SIRT6/NUP210/CANT1/GPAA1/PUDP/  
J1/ZNF385A/MAGED1/FZD7/RHOG/HSF1/GLIPR2/NCF1/PRMT1/CARD9/MGAT5/AKR1C3/DDIT3/IGFE  
!/SPOCK2/B4GALT2/XYL2/UGDH/POMT2/FUT3/ADAMTS9/MUC5B/DPAGT1/BGN/IL15/A4GALT/STT3  
'AKAP8L/EHD2/LAMTOR1/RNF26/FA2H/KIFC3/RTN3/TGFB2/CHMP3/BANF1/RAB10/MYOF/CIT/VPS2  
GA2/LAMTOR5/APOBEC3G/XPR1/CHMP3/NUP85/IFI16/BANF1/NUP43/PML/VPS28/SMARCB1/RAE1/  
I2/NFAM1/CDH17/LCK/PTPN6/CD27/IL12RB1/CYP26B1/CD79A/IL15/MSH2/DROSHA/KAT2A/IL4R/  
J14/TNFRSF11A/NPLOC4/PSMB2/IRF7/TGM2/PSME3/TNIP2/LAG3/FLOT1/SMPDL3B/ADAM8/NONO/U  
'CROCC/FHDC1/OCRL/CETN2/LRRC61/WRAP73/TMEM107/CEP250/HAUS6/ATP6VOD1/NDE1/TTC26/C  
'C5AR1/MSH2/ARRB2/PRKCI/TGFB3/APP/PPP5C/IKBKG/AXL/FADD/PIGT/CBL/AKT1S1/RACK1/NAE  
H1/CORO1B/HIP1R/PAM/SRI/NCKAP1L/MLST8/CAPZA1/RANGRF/DAPK3/MKKS/ARHGD1B/FHOD3/H  
'CROCC/FHDC1/OCRL/CETN2/LRRC61/WRAP73/TMEM107/CEP250/HAUS6/ATP6VOD1/NDE1/TTC26/C

:PG5/WDR1/GPR183/EIF2B5/MAPT/RHEB/CSPG4/MED12/NF2/CCL3/PRPF19/ABL1/CSK/SGAP2/HI

'SF13B/PSMB10/PSMA5/CCL4/COMMD7/PSMD13/CD27/PSMC4/CASP1/MAP3K14/SMPD4/PSMD10/PSM  
!:/LTBR/FAIM/NKIRAS2/PPP5C/CARD16/IKBKG/FADD/ECM1/BTK/PELI1/PRDX4/ZNF675/TNIP1/TF  
.2L1/EGLN2/ZPR1/MECP2/CDK5R1/RHOA/STXBP1/SIX1/LGMN

'ELI3/GRINA/ACVR1/SLC25A5/SFRP2/TNFAIP3/TRADD/CTNNA1/THBS1/CSNK2A1/CASP8/PTPN1/V



K2/IFITM2/DDB1/P4HB/MX1/TRIM32/VAPA/TBC1D20/ADAR/TRIM27/SETDB1/TRIM62/CD4/APOB  
ASC3/FIP1L1/RBM8A/CSTF3/MAGOHB/ZNF473/RPRD1A/POLDIP3/THOC7/THOC3/U2AF1L4/SRSF3/  
/IRF4/IFNG/ANXA1/CCR2/CD80/SOX13/RASGRP1/FGL2/LILRB2/NLRP3/IL12A/ZBTB7B/PRDM1/S

4/GBA/KCTD10/WFS1/UBE2L3/PSMB8/RNF187/PSMB10/PSMA5/DNAJB2/TAF9/PSMD13/PSMC4/GSK  
KIF18A/WIPF3/LIMK2/CCT3/HMGB2/YBX3/EIF5A2/BAX/MFGE8/NROB1/SNRPA1/FANCG/ZP3/RUVE  
:/SLC26A6/TNFAIP6/HSF1/KIF18A/WIPF3/LIMK2/HMGB2/YBX3/EIF5A2/BAX/NROB1/SNRPA1/CAS  
:/SLC26A6/TNFAIP6/HSF1/KIF18A/WIPF3/LIMK2/HMGB2/YBX3/EIF5A2/BAX/NROB1/SNRPA1/CAS  
/NPEPPS/EHD1/ARHGAP1/HCLS1/LYN/ITGB1BP1/REEP2/AKAP8L/IL1B/EHD2/CDK5/TXN/UBE2L3/

IG/MAP3K14/TNFRSF10B/DVL2/MST1R/C5AR1/RPS3/TGFB3/MUC20/ADRA2A/SPRY4/MAP3K6/IKBKG/ZNF6  
4/GSK3A/FGFR2/DVL2/RNF220/PSMD10/PSMD11/PSMD1/PSMA7/RUVBL2/PSMB3/SDHAF2/CTDNEP1

;/F2RL1/DYNLL1/PPARD/GPI/PPIA/ZC3H12A/BID/CCT4/BCAP31/UBE2J2/FERMT1/NPEPPS/SRI/A  
IKBKG/AXL/CBL/AKT1S1/RACK1/NAE1/BTBD10/TFAP2A/MAPT/CCL3/BTG2/ABL1/ZNF746/FCGR2E  
1/PSMD1/PSMA7/RUVBL2/PSMB3/SDHAF2/CTDNEP1/PSMD4/TRPM4/PSMD3/RBX1/PSMD7/TBL1XR1/

D16/IKBKG/FADD/ECM1/PELI1/TNIP1/TRIM25/PIDD1/ABL1/TNFAIP3/TRADD/BCL10/CASP8/MAV  
FRP2/DBNL/HSP90AA1/TBX2/DNM2/NOTCH1/LLPH/VEGFA/RAB11A/MESP1/IFRD1/CDK5R1  
IN

USC2/CASP8/TRIM21/BCL2L1/THOC2/VPS37B/TNFRSF14/IFITM3/SLC22A5/EPHA2/IST1/KPNA6/  
R1/DRG1/MAPT/ARPC1A/WNT4/NF2/BRK1/ARPC5/ABL1/STMN2/ACTR3/SPIRE1/DCTN1/MECP2/CDK  
AG2/TBC1D7/BCL10/HSP90AA1/RPL5/PIAS4/MASTL/HSPA5/TRIM21/IVNS1ABP/UBR5/CHFR/NMI/  
CCL19/KLF5/HTT/CAV1/ATP7A/DZIP1/PLD1/EVI5L/NCKAP1/PPP1R9A/PLEKHM1/CCDC88A/NEURL  
HDAC8/ADD1/PPARG/PIN1/STK4/RPL11/EPB41/PARK7/IRF4/MBD2/IFNG/EIF4G1/DERL1/ERCC2/  
CD4/HYAL2/ANXA1/VPS33B/VAMP1/NKD2/RAB7A/VAV3  
I/DYRK3/ANXA1/CCR2/ERCC2/RPS17/BAP1

.B2IP/FKBP14/STUB1/ADD1/SSR1

'GPRC5B/PDGFA/FGR/LCK/PTPN6/SAMSN1/SOCS3/SLA/FGFR2/DVL2/MST1R/IL15/CADM4/MATK/LF  
'GPRC5B/PDGFA/FGR/LCK/PTPN6/SAMSN1/SOCS3/SLA/FGFR2/DVL2/MST1R/IL15/CADM4/MATK/LF  
;/PSMB8/TNFSF13B/PSMB10/PSMA5/CCL4/COMMD7/PSMD13/CD27/PSMC4/CASP1/MAP3K14/SMPD4/  
;R2B/TNFAIP3

IARS2/TSEN15/DPH3/RPP30/DALRD3/TRMT2B/EXOSC2/CDK5RAP1/CARS2/QRSL1/SARS2/RTCB/ME1  
IETTL3/UCN/CASP3/POLDIP3/HNRNPD/PLA2G6/PYM1/FXR1/IFNG

'HIP1/SOCS5/SNX6/FASLG/PIGR

UT1/AHCYL1/SRSF4/RPRD2/CLP1/NUDT21

IP2/DLG3/CSF1R/MAGED1/PGK1/FZD7/HSF1/GLIPR2/NCF1/PRMT1/CARD9/IGFBP3/TNFRSF18/TN  
AP2/CXCL13/SIPA1L2/ARHGDIB/TBC1D30/CCL4/TBC1D13/RASA3/DVL2/ARHGAP30/AGFG1/ABR/5  
!/RBBP7/TRIM71/MYBBP1A/ZNF335/SEC13/DOT1L/TDG/HAT1/MBD3/HNRNPU/TSN/EXOSC10/TAF1E  
POMGNT1/MGAT4A/NAGPA/MFNG/FUT1/LFNG/EXT1/VCP/DHDDS/B4GALNT2/DAD1/POFUT2/FUT8/GA  
POMGNT1/MGAT4A/NAGPA/MFNG/FUT1/LFNG/EXT1/VCP/DHDDS/B4GALNT2/DAD1/POFUT2/FUT8/GA  
.5/IVNS1ABP/UBR5/CHFR/NMI/RASSF5/DAXX/GLMN/PRMT3/UBE2N/PEF1/CAV1/PARP10/STUB1/RA

ZNF683/PTPRC/CLEC4E/LOXL3/CD180/RPS6/NFKBID/IRF4/UNG/IFNG/ANXA1/SUPT6H/DOCK11/C  
./TLR1/NOD2/ARG2/LILRB1/RASGRP1/TICAM1/UBE2J1/WNT5A/C5AR2/CACTIN/SLAMF1

!/SMCHD1/BRCC3/UBE2V2/PARG/NUDT16L1/CEBPG/FIGN/WRNIP1/RNF168/RECQL5/EYA2

;/WASF2/MAPKAPK2/VAV1/NDN/SOGA1/ITGA5/DOK1/ATP6V1C1/IQGAP1/ARPC4/PDGFRL/EFNA5/RC  
'BL1/PYGO2/MAST2/SLC4A2/PPP2R1A/PHC2/TSPAN8/TTL1/EIF2S2/DYNLL1/DPCD/FSTL3/NDC1/  
;15/NPM1/SPRED1/BRCA1/THY1/COR01C/UBASH3B/SIRPA/SOCS1/CTDSPL/COPS9/F2RL1/PPP1R9E  
'CBFB/PSMB4/PSMB8/PSMB10/PSMA5/PSMD13/PSMC4/GSK3A/FGFR2/DVL2/IFT80/RNF220/ATP6VC  
.P4K2C/RALB/PACS2/ATP6V0D1/RUBCN/RHEB/VMP1/SUPT5H/PAFAH1B2/VCP/NPRL3/ATG4B/NSFL1

'BL/RACK1/CSPG4/NF2/ACVR1/ABL1/SFRP2/PTPN2/ADAM17/TNK2/PTPN1/VEGFA/PAK2/DGKQ/PPF

IG/ABL1/SYMPK/NFATC4/TDG/TMC8/BAG2/SPPL3/NVL/TRAF4/HSPA5/MITD1/STK3/SNAPIN/LRPAF

;/ARFRP1/RGP1/GGA3/UBA52/LMTK2/RAB11A/RAB29/VPS37B/TMEM87A/AP3B1/CLTC/AP1S1/SNX1  
!;/CDC42EP2/STX4/VIM/TRIM25/CCL3/CIITA/ACTR3/VCAM1/PTPN2/IRF5/KYNU/OAS3/TLR2/TRIM  
'PN1/OPTN/HSPA4L/COPS5/HSPA5/CANX/EDEM2/HSPA14/PPP2R5B/GFPT1/TLN1/DAXX/HSPB7/ANK  
;6/INPP5D/ZNF683/PTPRC/IKZF3/METTL3/LOXL3/NFKBID/CLPTM1/SH3RF1/IRF4/IFNG/ANXA1/C  
;/CD80/RASGRP1/LILRB2/NLRP3/IL12A/ZBTB7B/ROR2/SOCS5/MYB/ZAP70/CTNNBIP1/MALT1/CD1

i;/RAB7A/CHMP6/EPN1/RASSF2/AFAP1L2/TSG101/HIP1

PL1/CHMP4A

:/MAGED1/FZD7/HSF1/GLIPR2/NCF1/PRMT1/CARD9/IGFBP3/TNFRSF18/TNFAIP8L3/TRAF2/AREG/  
IARK2/NCAPG2/FGFR1/MT3/DVL3/NCKAP1L/MLST8/DBF4/ADAM8/PAK4/VLDLR/SHC1/KIF14/AXIN1

ID8/TAF10/DESI2/VCP/PSMA1/TNFAIP3/USP5/COPS6/CLSPN/PSMB5/SEN3/PSMA4/PSMD9/RPS27  
.2/VPS11/YWHAG/ATG13/TIGAR/TFDP1/ATG7/HTT/HAX1/TMEM102/CSNK2A2/PARL/HUWE1/BIK/DE  
I1/HTT/DZIP1/KIAA1324/EVI5L/FEZ2/RAB1B/STAM/CCDC88A/PIP4K2B/UBQLN2/ULK1/TCHP/DYN

./PSME2/MYB/PDGFR/PSMD6/GATA3/PSMC2/PSMA6/NUDT21/YAP1/TP73/HSPA9/PSMD5/CDK12

.D1/ATP6AP1/PAK1/CRABP2/ANKRD27/NRCAM/XRCC2/BIN1/ARPC2/HDAC1/RELN/CSNK1E/MARK2/C  
FNB1/MAP1S/PAK1/CRABP2/ANKRD27/NRCAM/THY1/COR01C/PALLD/HSP90AB1/EPHB6/ISL2/GAS7  
N4RL2/BIN1/ISL2/RELN/CSNK1E/ZSWIM5/MARK2/GDI1/EPHB3/FGFR1/MT3/DYNLT1/DVL3/VLDLF  
/MAP1S/PAK1/CRABP2/ANKRD27/NRCAM/THY1/COR01C/PALLD/HSP90AB1/EPHB6/ISL2/GAS7/REL  
'A1/HLA-DMB/VSIG4/CTSK/WIPF3/TRAF2/RBCK1/PSMD14/HMGB2/TRIM6/WASF2/CCL5/BAX/CD86/  
6KB2/RACK1/VIM/TRIM71/DPH7/ZNF598/PLEKHN1/EIF2B5/RPL38/KHDRBS1/PIWIL4/BTG2/LARF  
ERPINE1/RNF34/SLPI/PERP/BCL2L12/NOL3/BIN1/HDAC1/CST2/PRELID1/LEF1/SERPINB1/HIP1  
./DDIT4/AGBL5/IRF7/ZC3H12A/STAB1/BCL3/SHC1/CXCL9/CXCL13/NLRC5/PLSCR1/DEFB1/SLC11  
R1/CDK5/LAMTOR1/CTTN/MEG3/SPOCK1/RNF157/PHB/DNAJB2/TGFB2/TAF9/GSK3A/PML/CXCL16/

O/DESI2/VCP/PSMA1/TNFAIP3/USP5/CLSPN/PSMB5/PSMA4/PSMD9/RPS27A/USP21/CFTR/UIMC1/  
35C1/ST3GAL5/POMGNT1/MGAT4A/NAGPA/MFNG/FUT1/LFNG/EXT1/VCP/DHDDS/B4GALNT2/DAD1/F

NK2/NBN/AAK1/VEGFA/PAK2/LMTK2/MAP3K10/PPP2R5B

.3

RA2/CD84/THOC1/INPP5D/DUSP22/PTPRC/CNR1/LOXL3/NFKBID/CASP3/BCR



.9/NME1/ADORA1/PRNP/HRAS/RAB31/APLP1/SYK/MTMR2/HCK/UNC13D/LRP10/CD151/NCF4/EZR/T  
'CCL13/RELN/S100B/ZSWIM5/MARK2/GDI1/EPHB3/COR01B/SLC9A3R1/MT3/DVL3/SH3KBP1/CCL2/  
'NFRSF11A/RELN/MARK2/NCAPG2/FGFR1/MT3/DVL3/NCKAP1L/MLST8/DBF4/FGFR3/ADAM8/PAK4/V  
;1/EVPL/VDR/GORAB/MAFF/APCDD1/LAMB3/GAL/MYO5A/KRT20/HPSE/S100A7/OVOL2/KDF1/TRADE

;A/LRPPRC/KIF5B/DYNC2LI1/ARL3/TRIM46/TUB/TTC21A/ARL8A/CNIH2/BBS12/TRAK2/IFT140/E  
;A/LRPPRC/KIF5B/DYNC2LI1/ARL3/TRIM46/TUB/TTC21A/ARL8A/CNIH2/BBS12/TRAK2/IFT140/E

./SOCS5/STAT3

'L42/MRPL22/MRPL58/MRPL38/MRPS30/GSPT1/MRPS27/MRPS18A/MRPL43/MRPS9/MRPL50/GLE1/M

B/DNAJC6/RAB34/RHOQ/TFRC/MRC2/WIPF3/CARMIL1/WASF2/RABEP2/MAPKAPK2/VAV1/COLEC12/  
SPH1/SCMH1/MKKS/ZFP41/DEFB1/OAZ3/FANCA/TESK1/RPL10L/ADGRG2/DAZAP1/POC1A/DNMT3A/  
.3/ILF3/GRB7/ZNF706/RPS3/SAMD4B/NCL/EIF3H/AGO2/CALR/APP/PPP1R15A/UQCC2/RPS6KB2/F  
I1/GRINA/VCP/FCGR2B/SRPRB/WIP11/ERP29/SGTA/RCN3/TATDN2/PTPN2/THBS1/DCTN1/PTPN1/C  
.R1/GPATCH3/CARD16/AXL/BTK/UBE2L6/TRIM25/LBP/CARD18/BTN2A2/FCGR2B/TNFAIP3/CSK/RN

iA/C5AR2/ARRB1/SLAMF1/SOCS5/STAT3

'DDR1/ZYX/CDK4/GIT1/CSF1R/NCF4/COL3A1/SH2D2A/GUCY2C/ESRP1/CREB3L1/COMP/NCF1/RHO

'1S/PAK1/CRABP2/ANKRD27/NRCAM/THY1/CORO1C/PALLD/HSP90AB1/EPHB6/ISL2/GAS7/RELN/S1

MH1/MKKS/ZFP41/DEFB1/OAZ3/TESK1/RPL10L/ADGRG2/DAZAP1/POC1A/DNMT3A/CYP26B1/AGFG1  
L12/NOL3/BIN1/HDAC1/CST2/PRELID1/LEF1/SERPINB1/HIP1R/PSME3/BID/MT3/BCAP31/PRR7/

CD38/GAK/ADCY6/DPYSL3/SNAPIN/EPHB2/CIB1/EVI5L/RYK/FSTL4/LPAR1/SEMA3F/TCHP/CEP97  
CL3/CIITA/ACTR3/VCAM1/PTPN2/IRF5/OAS3/TLR2/TRIM21/HLA-F/CDC37/NMI/RPL13A/STXBP1  
/SYT11/ADGRE2/CCR2/VAMP1/PRAM1/PRKCB/CHRNA5/SYP

/CARMIL1/CXCR4/SEMA4A/NDN/MAP2/DOK1/BRSK1/B4GALT5/EFNA5/RAB25/MAPK3/LAMC2/ST14/  
CB1/SMYD3/RAE1/KMT5C/ZMIZ2/LOX/RUVBL2/POLE4/NUP155/USP22/JADE2/KAT2A/BEND3/MTF2

PTGER4/NOTCH1/SRGN/MAVS/TLR2/ALOX15B/TWIST1/GLMN/IL17RA/TNFRSF14/DHX9/RBPJ/CCL1  
IP3/RNF216/MAVS/IRF5/DMBT1/BNIP3L/OAS3/IFNAR2/TARBP2/IFI6/DHX9/IFITM3/BECN1/TLF  
IM13/MFF/BAD/HSP90AA1/PRKAA2/SLC8B1/VPS35/CASP8/MRPL18/SH3GLB1/TOMM22/BNIP3L/SRE  
SMA3/ARL11/HYAL2/PSMB7/ERCC2/ACE/ZBTB24/XRCC5/SLC7A6OS/SETD1A/TP53/PLD4/PSMD12/

B/SEMA4C/MAP4K4/PTPRS/TRAK2/TSC1

RAK2/DAB2IP/PARP10/TAF3/PKD1

POBEC3B/IFNGR2/RNASE6/ANKRD1/SCRIB/VTCN1/GRN/GBP5/HSF1/CFL1/CARD9/APOBEC3C/CHI1  
D27/NRCAM/THY1/PALLD/HSP90AB1/EPHB6/ISL2/GAS7/RELN/S100B/CDH11/ZSWIM5/MARK2/GDI  
POBEC3B/IFNGR2/RNASE6/ANKRD1/SCRIB/VTCN1/GRN/GBP5/HSF1/CFL1/CARD9/APOBEC3C/CHI1  
/NPEPPS/CD68/RPLP2/LAMP3/HSPA4/TRAM1L1/SIX2/RPSA/YWHAH/KPNB1/SNF8/HCLS1/BBC3/PM

PPARD/FERMT1/MY01G/DAPK3/KIF14/JAG1/ITGB1BP1/CCL28/RAC1/ITGA2/CDK5/SPOCK2/CTTN/

1/ITGB1BP1/CCL28/TNC/CBFB/IL2RA/SPOCK1/MYADM/PLXND1/PTPN6/TACSTD2/IL4R/SEMA4D/S

/TMEM67/ADD1/PPP1R9A

;T8/TRIM65/CAPN1/PIP4K2A/LAMP3/ATP6V1H/DAPK3/SNF8/CLN3/VDAC1/ATP6V1E1/GBA/LAMTOF  
POBEC3B/ADAM15/IFNGR2/EME1/RNASE6/ANKRD1/SCRIB/VTCN1/GRN/GBP5/HSF1/CFL1/CARD9/I  
PABPC1/TICRR/GGCT/MRPL47/TRNAU1AP/ORMDL2/B4GALT3/PPP1CA/MRPL9/PA2G4/ZC3H12A/NCE  
;T8/TRIM65/CAPN1/PIP4K2A/LAMP3/ATP6V1H/DAPK3/SNF8/CLN3/VDAC1/ATP6V1E1/GBA/LAMTOF

RG1/HLA-A/RNF19B/SASH3/IRF1/CTLA4/TNFRSF11A/TFE3/LEF1/PDCD1/IRF7/ZC3H12A/ERAP2/

/PSME2/PSMD6/MALT1/NFATC2/PSMC2/PSMA6/FBXW11/MAPK1/PSMD5

'CDH11/ZSWIM5/MARK2/GDI1/EPHB3/NUMBL/MT3/DYNLT1/FLOT1/SH3KBP1/VLDLR/LYPLA2/SHC1/  
'1/SRI/ADAM8/HEYL/TRIM31/HDAC2/FZD2/NLRC5/HCLS1/KDM1A/FANCA/CARD11/CCDC22/BUD31/

'8/PTTG1IP/NF2/IP013/PK1A/WRAP53/RPF2/TMEM98/HNRNPU/NVL/MAVS/CD2AP/HIKESHI/ZPR1/  
IAPKAPK3/DBNL/ERP29/THBS1/PTPN1/RPS27A/VEGFA/PLA2G1B/UBA52/DUSP7/MAP3K10/TPD52L1  
iR1/SRF/NIN/IST1/SLC9A6/CTDP1/ADNP/RYK/PIN1/FSTL4/MEX3C/SEMA3F/MEGF8/ULK1/ARIH2/

RAF2/CCT3/SAE1/TRIM6/P3H1/TRIM28/CCL5/NUTF2/PHPT1/MIF/MTCL1/PKDCC/EFNA5/CD2/HIF  
VOC/ATP6V0E1/BAG3/DNM1L/IKBK/PIP4K2C/RALB/DAP/ATP6V0D1/MAPT/RUBCN/RHEB/SUPT5H/

P1/PHAX/SNAPC4/GTF2F2/ELL/EXOSC6/MEPCE/SNAPC3/CCNT1/INTS10/INTS6L/INTS2/RPAP2/I

T20/PRKAG1/TIGAR/BECN1/HTT/RPTOR/ATP6V1B2/LARP1/KIAA1324/SNX5/FEZ2/RAB1B/MAP3K7  
STL4/SEMA3F/MEGF8/TRIM46/XK/SEMA6B/SEMA4C/PTPRS/TRAK2/PLXNB3/SHTN1/TTL/DPYSL2/N

15/HSP90B1/HSPA13/DAB2IP/FKBP14/STUB1/BAG6/ADD1/SSR1/ATF6B/SDF2/FICD/RNF121/RNF

'1/CARD9/PSMB9/IGFBP3/DTNBP1/TNFAIP8L3/TRAF2/PSMD14/AREG/TIMP2/JAK3/CCL5/MAPKAPK  
:C12/PHPT1/CD300A/HLA-DPB1/ARPC4/UNC93B1/CFD/PRKDC/PSMD2/MAPK3/CD276/HLA-DQB2/CI  
.8/FCHSD1/RAB3B/BIN1/HSP90AB1/F2RL1/ARPC2/ARPC3/GDI1/E2F4/PLOD3/PPP1CA/PPARD/COF  
'RX5/FAM53B/MARK2/PSMB2/ZNF703/TMEM237/PPP1CA/LEF1/SFRP5/PSME3/SLC9A3R1/DVL3/FEF  
'ASAL1/DBNL/PLXNC1/STYXL1/FIG4/MOB2/LLPH/VEGFA/HSPA5/DDX56/RAB11A/PACSIN1/PPP2R5

'MRPS9/MRPL50/MTRF1L/MRPS35/MRPS33/MRPS10/MRPL45/MRPL41/MRPL49/MRRF/MRPS6

AS/AGO1/POLR2B/FXR1/EIF4G1/CNOT2/HNRNPA2B1/SMAD2/ELAVL1/ZMPSTE24/NUP214/SMAD3/M

)TRT2/DUS3L/TARBP1/TRMT10C/ANKRD16/CDKAL1/TRIT1/ADAT2/ELP6/NSUN2/CLP1/METTTL8/TSE

:9B/PRMT2/OSGIN2/GDI1/PPARD/LEF1/MT3/PAK4/EXTL3/CPNE1/KIF14/BCAR1/CDK5/LAMTOR1/C

.M17/CSNK2A1/NOTCH1/VEGFA/EXOSC9/GLI1/RAB11A/ZPR1/PPM1F/PPIB/SRF/RHOA/CD38/HBEGF

'MRPS9/MRPL50/MRPS35/MRPS33/MRPS10/MRPL45/MRPL41/MRPL49/MRPS6/TUFM/OXA1L/MRPS28/

'TLR8/MAP3K7/CNPY3/MFHAS1/IRF4/CTSL/CTSB/BPIFB1/PTPRS/APPL2/RPS6KA3/TLR1/S100A1  
'1C/PTPRC/CXCL10/CASP3/MYC/HUS1/FIGNL1/EYA3/ANXA1/TLK2/CLK2



'PELI1/ZNF675/IGBP1/CCL3/PELI3/PSMD8/PSMA1/PSMB5/PSMA4/PSMD9/RPS27A/MTHFR/UBA52/

ISMF/CTTNBP2NL/SBF1/PTPN23/PTP4A2/YWHAB/DUSP12/PPP4R1/SDHAF2/PTPRE/PTPA/CABIN1/C

:F2/CYP4A11/PCK1

UFA13/APBB1/CCAR2/CYP27B1/CTDP1/IP6K2/NAIF1/EAF2/PPARG/RYK/FSTL4/SEMA3F/TCHP/HY

RPL23/AKT1S1/RACK1/ZNF675/RGS3/IGF1R/MAPT/STK38/RUBCN/NF2/PKIA/ABL1/SFRP2/TNFAI

1/CARD9/PSMB9/IGFBP3/DTNBP1/TNFAIP8L3/TRAF2/PSMD14/AREG/TIMP2/JAK3/CCL5/MAPKAPK

PS3/MTCP1/TGFB3/MUC20/ADRA2A/TELO2/MAP3K6/IKBKG/RALB/CSPG4/DBF4B/CEMIP/TRAF7/CX

B/DVL2/LRP8/PRKCI/ZMYND8/SEMA4D/SYT1/DNM1L/SYT3/GDPD5/KATNB1/STK25/ARHGDIA/SCN1

FRP2/TNFAIP3/PRKRIP1/PTPN2/PTPN1/DUS2/PAK2/DUSP7/TARBP2/PPM1F/PRKAR1B/GSKIP/YWF

IIN8/HEATR3/HYAL2/IFNG/GEMIN6/SMN2/IP07/PIK3R2/APPL2/NOLC1/NUP214/HDAC3/SMAD3/GE

IAD3/MYCN/MAEL/TP53

IZ1/RBPJ/ARRDC1/PSEN2/NOTCH2/EGF/LLGL2/BMP2/YTHDF2/CHAC1/METTL3/NCSTN/EGFL7/NEU

4C/PTPRS/MUL1/SHTN1/UNC13A/TTL/BCL11A/DPYSL2/DVL1/SYT17/WNT5A/PPP3CB/OLFM1/WNT3  
ETDB1/PRMT6/BRD7/BRD4/ASF1A/NSD1/TLK2/AKAP8/KMT2B/SUPT6H/KDM3A/WBP2/ZMPSTE24/SE

ISC3/PIWIL4/REX02/DNA2/KRI1/DCLRE1B/EME2/CPSF3/RAD1/CHD1L/TATDN2/RPS27A/POP5/ERC

GFB3/MUC20/ADRA2A/MAP3K6/IKBKG/STK25/CSPG4/DBF4B/TRAF7/CXCL17/ABL1/STK24/CLSPN/

IT3/FLOT1/SH3KBP1/VLDLR/LYPLA2/SHC1/PIK3CD/RAC1/ACTB/CDK5/CTTN/PLXND1/RAB10/C12c  
IAJB2/F3/LCK/IFI16/PSMC4/CASP1/GSK3A/OSBPL7/PML/PSMD10/RPS3/TFAP4/APP/ADRA2A/RBX  
TRPM4/CCRL2/GPR157/MY05A/LETM1/CCL3/CEMIP/ABL1/CALM2/PLCB2/PTGER4/SPPL3/SLC8B1/

AN/EDEM2/ACAN/NUDT18

1/TRAPPC3/STX4/TRAPPC2L/PDCD6/NSF/SNX11/SEC13/HPS1/STX7/HOOK2/DNM2/SRGN/GNAI3/F

;/OR7E24/OR10J1/OR1D2/OR1D4/OR10G8/OR51G1/OR5F1/OR7A10/OR5P2/OR10T2/OR4C46/OR10F

./PAF1/ZNF16/ACIN1/MOV10/DPY30/ANKRD54/AGO1/MYC/BGLAP/PRMT6/CD4/IFNG/KMT2B/PRKCE

F3C4/ICE1/GTF3A/GTF2B/INTS3/RPRD2/INTS5/NCBP1/BRF1/PHAX

US1L/APOBEC3F/THUMPD2/NSUN5P2/METTL2B/AARS2/METTL6/PARN/THUMPD3/QTRT2/DUS3L/TAF  
'TRIM46/RNF126/VPS29/DNAJC13/VPS54/RAB7A/ACTR2/RAB6A/SRSF10/STX16/SNX6/SNX2/EHD3

./EREG

./MRPS2/MRPL21/NDUFA7/AARS2/MRPS26/C1QBP/MRPS11/MRPL42/TRMT10C/MRPL22/NOA1/MRPL5

UBQLN2/ULK1/PIK3C2B/WDR45/ATG3/RAB7A/GAA/FEZ1/CHMP4A/TFEB/SMCR8/PHF23/CCDC115/L  
4/NUP214/SMAD3/MYCN/MAEL/TP53

A/CHD7

/RBM22/USP36/KIF5B/HYAL2/HTRA2/IFNG/ARIH2/PIK3R2/UBL5/HDAC3/BAP1/SMAD3/TP53/TAF

IP1/LTBR/PIEZ01/RUVBL2/BAG3/GRB2/CNN2/TLR5/XRCC6/CARD16/FADD/RAD9A/CUL4B/LETM1/  
IP1/LTBR/PIEZ01/RUVBL2/BAG3/GRB2/CNN2/TLR5/XRCC6/CARD16/FADD/RAD9A/CUL4B/LETM1/

APGEF1/PSMC5/NPHP4/TLE6/KLHL12/CAV1/DAB2IP/DKKL1/BMP2/PSMB1/WWTR1/STK4/KREMEN2/

'RPF19/PELI3/PSMD8/KLHL42/WSB1/PSMA1/TNFAIP3/FOXF2/RNF216/PSMB5/PSMA4/PSMD9/RPS2  
'3K6/IKBKG/STK25/ZNF675/IGBP1/IGF1R/STK24/FCGR2B/SFRP2/PDCD10/DBNL/PTGER4/PTPN1/  
.BL1/TBCD/VCL/TRIP6/CDH24/MPP7/CTNNA1/PTK2/THBS1/VEGFA/ACTN1/PPM1F/PARD3/TLN1/SF

'XN/GNB1/DEAF1/SWI5/B4GALT2/DNMT3A/IFI16/PPP1CC/NDRG4/PML/PPP1R1B/PARP1/CRIP1/TI  
'YBX3/CHMP4B/HMOX1/BAX/MAPKAPK2/FAM83D/SIRT6/SOGA1/NUP210/DHX34/PCBP4/MTCL1/MSN/

.1/ACADL/ACOX2/CYP4F3/DCXR/AGXT2/SORD/PCK2/SLC27A2/PON3/ABAT/EHHADH/HAO2/AKR1D1/

:5/PIH1D1/TRMT12/MECP2/ETF1/BAZ2A/NSUN4/MLLT6/GATAD2A/TGS1/PRMT3/DNMT3B/COPRS/RN  
./TNFRSF14/DHX9/CCL19/OSM/IL17RB/PANX2/CLEC4E/CRLF2/TNFRSF1B/TLR8/FFAR2/TRIM27/5

'4/NUP214/SMAD3/MYCN/MAEL/TP53  
.4F/HEY1/SEMA5B/ARHGDIA/VIM/SEMA3C/PMP22/SEMA3E/CBFA2T2/STMN2/NFATC4/GDF11/DENNI



;4/PCBP4/MTCL1/MSN/ATP6V1C1/RRAGD/FOXK1/PSMD2/HIF1A/MAPK3/NUPR1/HSPA8/RRAGC/RHBI  
/AGXT/HPD/TAT

K7/COX4I1/ATP6V0A1

'ARD6B/CDC42/LAMB3/PRKCI/TGFB3/WDR1/EPB41L3/PARD6G/WNT4/VMP1/NF2/LIMS1/ABL1/TBCI

'RBBP8/BRCA1/XRCC2/ACTL6A/IFT52/EIF2S2/PELO/E2F8/HOPX/NCAPG2/PLOD3/LEF1/RRP7A/SA  
IF14/LYN/RAC1/KCTD10/STMN3/TGFB2/RASA3/ARHGAP30/ABR/CADM4/SIPA1L3/CDC42SE1/FGD€

M/SEH1L/EIF6

P2/ZP3/SH3PXD2B/PRKDC/SLC9A1/EFNA5/RUVBL1/FLVCR1/MAD2L2/HIF1A/MRGBP/PPP2R1A/PAK  
RL1/STAT1/HDAC1/DDIAS/NPLOC4/DYRK2/CARD19/HYOU1/DDIT4/SFRP5/ZC3H12A/SLC9A3R1/BI

TIGAR/BPGM/SEH1L/EIF6

P2/ZMPSTE24/SUPT3H/BAZ1A/IWS1/PHF20/KAT5/MSL3/ARRB1/MCM3AP/OGT/KANSL2/BRD8/MSL1

UBE2J2/FERMT1/NPEPPS/SRI/ADAM8/GIPR/MCU/FRMD8/HCLS1/ITGB1BP1/RAC1/IL1B/CDK5/UBE  
B/NFKB2/ITGAX/LAMC2/LCP1/MMP10/SERPINE1/FGFR4/LAMA5/MMP2/ITGB5/FMOD/PLOD2/PLOD3

LILRB1/FUT7/CD80/NLRP3/IL12A/ZBTB7B/PRDM1/SOCS5/CD274/STAT3

NF19A/RAD23A/SVIP/DVL1/CLEC16A/OGT/MAPK9/SOCS5

GNA12/RBBP8/BRCA1/XRCC2/ACTL6A/IFT52/EIF2S2/PELO/E2F8/HOPX/NCAPG2/PLOD3/LEF1/RF

H1/SFRP4/TMEM64/GLI1/MESP1/RNF213/PSMC3/STK3/RAPGEF1/PSMC5/NPHP4/TLE6/BARX1/KLF  
HBDD3/GLMN/INHA/TNFRSF14/IDO1/RUNX3/XCL1/IL13RA2/CD84/THOC1/INPP5D/DUSP22/PTPRC

M/SEH1L/EIF6

ENTPD6/CANT1/HLA-DPB1/CLTA/MOSPD1/UNC93B1/ZDHHC7/B4GALT5/CREB3/GBP2/TMEM165/GALN  
IS1/SIRT6/GINS4/PRKDC/RUVBL1/HIF1A/CBX1/UBE2I/CHD3/ACD/BRCA1/PCNA/MCRS1/CHAF1A/S  
QB1/TRPM2/IFI30/TUBB4B/GRN/NCF1/CYB561/HLA-DPA1/HLA-DMB/TPCN1/CTSK/CHIT1/ATP6VC  
X11/E2F4/PPARD/INCENP/CBX3/DVL3/HDAC2/KDM1A/NASP/HMG4/CHRA1/EHMT2/BUD31/AKAP8  
APH/GINS2/MCM10/FANCD2/SMARCD3/OIP5/CBX6/POLD1/MCM7/CCDC137/PLCB1/PIF1/MCM3/RAI  
56/RAN/SNHG7/RRP12/HMGB2/S100A3/HMOX1/LIN28B/MAP2/NAA10/FANCG/SNHG12/MRT04/PRK  
QB1/TRPM2/IFI30/TUBB4B/GRN/NCF1/CYB561/HLA-DPA1/HLA-DMB/TPCN1/CTSK/CHIT1/ATP6VC  
/FLOT1/CD68/VLDLR/HLA-DQA2/LAMP3/CPNE1/ATP6V1H/CLN3/SLC36A1/HLA-DRB5/SLC26A11/A  
4/RNASE6/HLA-DQB1/TRPM2/IFI30/TUBB4B/GRN/NCF1/CYB561/ATP6V0B/HLA-DPA1/HLA-DMB/T  
RAGD/SSNA1/RGS14/SLC1A4/CHD3/NPM1/PCNA/XRCC2/SGO1/SFI1/DYNLRB1/IFT52/DYNLL1/DYN  
FT57/CHEK1/RASSF7/RAN/HSF1/RAB11FIP5/SAC3D1/KIF18A/CRMP1/ESPL1/RABEP2/MAPKAPK2/  
AM83D/MTCL1/CLTA/MAD2L2/RGS14/MAP1S/CBX1/CENPE/NPM1/SGO1/DYNLL1/SPDL1/CAPN6/KN  
IP/ITGA5/FLOT2/MSN/IQGAP1/PTK7/SLC9A1/EFNA5/MAPK3/HSPA8/FZD1/PLEC/LCP1/MAP2K2/S  
RG1/MICALL1/HLA-A/ATP6AP1/CD63/ABCB6/CHMP4C/RAP2B/CORO1C/SCAMP4/HGS/NPC1/RAB7B/  
-DQB1/TRPM2/RHOG/SLC26A6/RAB11FIP5/CD53/RAB34/SNX7/PLAU/GIPC1/TFRC/ATP6V0B/HLA-  
CORO1C/BMF/BIN1/PALLD/NPFFR2/ARPC2/MYO19/KNTC1/GAS7/PPP1R9B/TIGD5/ARPC3/WIPF1/I  
ICAPG2/RNPS1/REX04/INCENP/UNC45A/NELFE/FBL/BLM/DBF4/NHP2/NONO/DAPK3/CDK2/LSM10/S  
10/RAB35/VMA21/PAM/MT3/SYTL1/FGFR3/HLA-DQA2/SV2A/SYNGR3/KDELR1/CLN3/HLA-DRB5/MC  
1/QSOX1/ITGAV/VAT1/MVP/RAB31/UNC13D/CD109/TUBB/CSTB/TMSB4X/S100A8/LYZ/NME2/F13A  
C26A6/RAB11FIP5/CD53/RAB34/SNX7/PLAU/TFRC/ATP6V0B/HLA-DPA1/DTNBP1/ABCC4/ATAD3B/  
M7/PLCB1/PIF1/MCM3/RAD51AP1/RCC1/SPAG5/CENPO/EZH2/EXOSC4/CDK4/MAD2L1/DNMT1/ALYF  
i/MUC1/IFNGR2/RNF24/BSG/HLA-DQB1/SLC50A1/CHST4/GRN/GBP5/RAB11FIP5/GLIPR2/RAB34/M  
IAJC5/TCN2/DDOST/EPDR1/ATP6V1C1/HLA-DPB1/CLTA/RRAGD/TMEM165/HSPA8/RRAGC/NEU1/GM2  
RAGC/HLA-DQB2/TCIRG1/MICALL1/HLA-A/AP4M1/ATP6AP1/CD63/ABCB6/CHMP4C/ANKRD27/RAP2  
IF1A/CBX1/UBE2I/CHD3/ACD/BRCA1/PCNA/MCRS1/CHAF1A/SGO1/SMARCA4/ACTL6A/IRF1/COPSE  
P1/TFRC/HMGB2/YBX3/HMOX1/DOK1/FLOT2/MSN/PDE4A/RAB15/MOSPD1/SLC9A1/GBP2/NUPR1/PI  
APBB1IP/ITGA5/FLOT2/MSN/IQGAP1/PTK7/SLC9A1/EFNA5/MAPK3/HSPA8/FZD1/PLEC/LCP1/MAF  
/RAB34/MGAT5/HLA-DPA1/AREG/TRAPPC4/RAB6B/RAB32/ENTPD6/CANT1/HLA-DPB1/CLTA/MOSPD  
/FLOT1/CD68/VLDLR/HLA-DQA2/LAMP3/CPNE1/ATP6V1H/CLN3/SLC36A1/HLA-DRB5/SLC26A11/A  
OTL1/ARHGEF2/KLC2/KRT80/HSPB1/COL4A5/REEP4/NME1/TRIM54/TPGS2/KIF11/GTSE1/HCK/CC  
OTL1/ARHGEF2/KLC2/KRT80/HSPB1/COL4A5/REEP4/NME1/TRIM54/TPGS2/KIF11/GTSE1/HCK/CC  
IT3/PRKCD/TOR4A/SERPINI1/QSOX1/ITGAV/SCAMP5/SLC6A9/VAT1/LAMP5/MVP/RAB31/MTMR2/UN  
OTL1/ARHGEF2/KLC2/KRT80/HSPB1/REEP4/NME1/TRIM54/TPGS2/KIF11/GTSE1/HCK/CCT5/SPAC  
i/SPAG5/MAPRE1/TUBB/RUSC1/NME2/TWF2/ASPM/EZR/KRT7/DCDC2/MID1IP1/TUBB4B/KIF12/TBC  
/RRS1/RRP9/DYRK2/MRPL47/RRP1/MRPL9/PITPNM1/RRP7A/SNRPE/FBL/ZC3H12A/TXNL4A/MT3/S  
iC/TIPIN/CHD4/RUVBL2/CENPB/RBBP4/TBX19/DFFA/UBE2A/SMARCC1/BRD9/KAT2A/BEND3/CBX5/  
KAP5L/MAP2/IQGAP1/RGS14/MAP1S/MAP2K2/CENPE/NUDC/KLC3/TUBB6/TUBA1A/TUBB2A/TTL1/  
SLC4A2/PAK1/GNA12/NPM1/THY1/ITGB5/CORO1C/PALLD/RPS2/ARPC2/PABPC1/RRAS/ARPC3/HYC  
2/PAK1/GNA12/NPM1/THY1/ITGB5/CORO1C/PALLD/RPS2/ARPC2/PABPC1/RRAS/ARPC3/HYOU1/CC  
SLC4A2/PAK1/GNA12/NPM1/THY1/ITGB5/CORO1C/PALLD/RPS2/ARPC2/PABPC1/RRAS/ARPC3/HYC  
PNE1/SLC11A1/RAC1/LAMTOR1/CD47/NFAM1/NRAS/SERPINB6/AGPAT2/RAB10/DYNC1L1/SLC44A  
i/ARPC2/GABRA3/PPP1R9B/ARPC3/WIPF1/S100B/SH2B2/CORO1B/PIP5K1C/HIP1R/SLC9A3R1/DYN  
PP2R1A/ACD/NSMCE2/PCNA/SGO1/DYNLL1/SPDL1/XRCC3/KNTC1/ERCC6L/NUP37/PPP1CA/INCENP  
3AR1/HSP90AB1/RAB7B/CLCN7/MFSD12/SORT1/GPR137B/FLOT1/CD68/VLDLR/HLA-DQA2/LAMP3/  
6/MRPS15/RPL5/RPS27A/MRPL18/RPS12/RPS4X/RPL6/RPL37/RPL27A/RPL36/UBA52/CANX/HSPA  
PL23/RACK1/LAS1L/CCT8/RPL38/RPL23A/MCTS1/HPS1/UBQLN4/RPS7/RPL7A/RPS23/RPS10/RPS  
DK2/SMC4/KNSTRN/DCTN5/NCAPH2/NUP85/BANF1/PPP1CC/CENPK/NUP43/DYNC1L1/DSN1/KMT5C

/ARPC5/STMN2/ACTR3/DBNL/CTNNA1/SRGAP2/DNM2/PTK2/INPPL1/CD177/PDLIM4/TUBB3/APBB1  
'1CC/CENPK/NUP43/DYNC1LI1/DSN1/KMT5C/CENPB/ZNF207/CBX5/NUP107/HELLS/RAD21/MTBP/C  
I8/MAGOH/IVNS1ABP/RBMX/ZRSR2/HNRNPA1/PPIE/SF3B3/HNRNPR/DHX15/GPKOW/RBM28/USP39/S  
'PL37/RPL27A/RPL36/UBA52/RPL19/MRPL37/RPS11/RPL22L1/NSUN4/RPL13A/MRPL27/MRPL28/F  
'MD13/COMMD9/DYNC1LI1/IMPDH2/ATP6VOC/PSMD11/GSDMD/ALDOC/PNP/XRCC6/PSMD3/CTSD/PSM  
'GSH/S100A7/GCA/VCP/PSAP/HSP90AA1/MAN2B1/CYB5R3/HEXB/BCAN/ACAN/AGA/LGMN/TPP1/MAN  
'CALM2/CEP19/BOD1/CSPP1/TCTEX1D2/DCTN1/KATNA1/PLK3/HNRNPU/RAB11A/PLEKHG6/NEDD1/K  
'N1/MY06/PACSIN2/LIMA1/CD2AP/PACSIN1/TLN1/RHOA/PDPN/FAP/EPS8L1/EPHA2/KSR1/ATP6V1  
'ATNA1/SH3GLB1/HNRNPU/ZFYVE19/GNAI3/MARK4/HSPA5/KIF20B/MITD1/ARL8B/VPS37B/EXOC3/  
'YSTM1/CTSD/CLEC5A/TBC1D10C/KCNAB2/STX7/VAMP8/DBNL/CD33/CD177/OLFM4/AP2A2/ATP6AF  
'B1/CYB5R3/GLIPR1/HEXB

'B1/CYB5R3/GLIPR1/HEXB  
'DDB1/TFIP11/THOC7/LRWD1/THOC3/POLR2B/TERF1/HNRNPA2B1/LRIF1/PPP1CB/ORC4/XRCC5/TF  
'DIA3/SNX3/ATP7A/MY01C/RAB8B/SYT11/HLA-C/VAMP3/KIF5B/RAB22A/ATP6VOA1/HLA-E/RAB7A  
'CENPQ/BOD1/DCTN1/HNRNPU

/MRPL33/RPL13/MRPL36/RPL4/RPL41/RPL9/MRPL14/RPL24/RPL11/RPL10/MRPL3/MRPL20/RPL1

'SB/ATP6VOA1/CTNS/RPN1/RAB2A/RAB7A  
'SB/ATP6VOA1/CTNS/RPN1/RAB2A/RAB7A  
'RPL9/RPS6/RPL24/RPL11/RPL10/RPS24/RPS3A/RPL14/RPL10A/ZNF622/RPL12/RPS18/RPS28/F

;/PRPF40B/BCAS2/SMU1/PRPF40A/XAB2/SYF2/CWC15/CRNKL1/ZMAT2/SF3A1

'NPH1/CWC15/WDR83/CRNKL1/SF3A1/GPATCH1

.T6/NCF4/EZR/HLA-DQB1/FZD7/CD320/GRN/RAN/RAB11FIP5/TBC1D16/MICALL2/TFRC/ATP6V0B/  
'UBAP2L/DYRK2/ZSWIM5/WDR77/ORMDL2/POLR3K/SNRPE/POLR2H/CCNO/UBE2J2/SNRPF/HDAC2/PI  
.3/SLC2A3/TSPAN14/MLEC/ADGRG3/DOCK2/SPTAN1/ITGAL/ATP11A/TCN1/DNASE1L1/PLD1/SLC04

:1/GMCL1/SPARC/HNRNPA2B1/AKAP8/LRIF1/MBD1/SMC1A/TP53/TEP1/DAG1/MEN1/TPR

IA9/PLD1/KIAA1324/VPS16/SNX16/MVB12B/OSBPL9/AP5S1/VPS33B/ARL8A/RAB7A/CHMP6/CYB5C

;/NFYC/POU2AF1/TAF12/TAF10/RARG/NFATC4/FOXF2/TBX2/LMO4/USF1/GTF3C5/HNRNPU/THRA/E  
:9A/MXRA8/GNB1/FGR/PLXND1/EVC2/CLTB/NDRG4/PIEZO1/ARF4/RPS3/MUC20/DPEP1/SPRY4/GPF

IP93/NXT1/SORT1/P2RX5/NUP205/NUP37/NDC1/NUP188/CBX3/CSE1L/SLC22A18/TXNL4A/DUSP2/

:A2/VPS11/AP3B1/CLTC/AP1S1/RAB27B/AP2B1/HBEGF/BTC/AP2A1/EREG/VPS33A/STEAP2/SNX3/

.A-F/AP2A2/COPB2/AP3B1/CLTC/AP1S1/GOSR2/AP2B1/HBEGF/COPB1/BTC/AP2A1/EREG/COPA/KI

BF1/SLC17A5/BCL2L1/HLA-F/CLTC/AP1S1/GOSR2/RAB27B/SNAPIN/TMEM184A/AP2A1/KLHL12/F

1D/UBTF/NUAK1/SMARCA5/RNMT/ZNF415/UBE2N/RPP30/POLR2E/SPATA2/SURF6/IMP4/TAF1B/AC

R2/PFN1/GAD1/NSMF/RIMS3/NCL/PARD6B/NRBP1/LLGL1/CDC42/PPFIA3/MYO9B/ACTL8/GMFG/AF  
RF1/STEAP2/COPA/KLHL12/PEF1/LMAN2/ATP7A/PKD1/ACTR1A/LMAN2L/ERGIC2/RAB8B/CD59/IF  
B/POLR3G/SETD5/LEO1/RPRD2/CRCP/POLR1D/POLR2J3/TAF4B/RECQL5

3G/SETD5/LEO1/RPRD2/CRCP/POLR1D/POLR2J3/TAF4B/RECQL5

i/WNT7B/RAB11FIP4/ANXA11/WAS/CACNG4/CLTB/AP2M1/RAB10/DVL2/AP2S1/ATP6VOC/HLA-B/AT  
5/MYO1C/ANTXR1/DOCK8/NCKAP1/ABCA7/KCNC4/THEM4/ATP2B1/VEZT/MYO1D/ADGRE2

3G/SETD5/LEO1/RPRD2/CRCP/POLR1D/POLR2J3/TAF4B/RECQL5

CAMP2/ARFRP1/BICD1/RGP1/OPTN/GGA3/RAB11A/RAB29/YIPF2/GOLPH3L/CHST3/CLTC/AP1S1/A

A2/RAPGEF1/CLTC/TAPBP/TAP2/AP2B1/HBEGF/AP2A1/RAB9A/CAV1/ATP7A/RAB8B/GPR161/HLA-



'COPG1/TMEM199/PDCD6/RASSF9/CEMIP/HSPD1/SEC13/VAMP8/WIP1/DBNL/COPG2/DNM2/TNK2/C  
'TNBP1/SYNGR1/DNAJC5/TRAPPC4/RAB6B/SLC1A7/MAP2/FLOT2/BRSK1/RAB15/SRPX2/CLTA/DGK2  
'/GYG1/ARHGAP9/HK3/CCT2/HSP90AB1/DYNC1H1/ILF2/AMPD3/NPC2/GPI/PA2G4/SERPINB1/PPIA

/EZH1/KMT2A/JARID2/RBM15/WDR82/CHD8/KANSL1/AEBP2/SETD1B/KDM6A/RBBP5/C17orf49/MC

'IF4A3/PRPF3/PRPF6/BARD1/USP22/ARHGAP18/SF3A3/ITPKC/TIMM50/CXXC1/OGG1/AAGAB/HAUS  
.YN/CARD11/VDAC1/EHD2/LAMTOR5/LAMTOR1/LCP2/MYADM/LCK/MYOF/CD79A/LRP8/APP/HK1/CD4

.YN/CARD11/VDAC1/EHD2/LAMTOR5/LAMTOR1/LCP2/MYADM/LCK/MYOF/CD79A/LRP8/APP/HK1/CD4

IP5/RAB27B/ATG9A/DPYSL3/PSEN2/SNAPIN  
'AM111A/KDM4A/NOLC1/ESRRA/MTDH/RPP38/PRMT7/STOX1/DDX46/DUSP11/IPO11/PSPC1/HOXB5/

IAPIN

'CLN3/LYN/CARD11/VDAC1/EHD2/LAMTOR5/LAMTOR1/LCP2/MYADM/LCK/MYOF/CD79A/LRP8/APP/E  
'AN1/CTBP1/GMFB/MAEA/ACTR1A/LLGL2/PPP1R9A/UTRN/EPB41/CAPZA2/C2CD2L/TCHP/DMTN/MEI  
'B1/THADA/C2CD2L/HTRA2/GNG2/RPS28/CARMIL2/ESYT1/GEM/IKBKB/GNAS/CHMP4A/HIP1/GNAI2

/DCTN2/FKBP4/CNTNAP1/ITGA2/ACTB/CDK5/CTTN/SPOCK1/ADRA2C/STMN3/AP3M2/INPP5J/GAD1

'1/TAF3/ERCC3/TAF1B/TADA3/TRRAP/PPARG/JUNB/NFYA/ATF6B/TCEA1/GTF2A2/ING2/POU2F1/E  
.3/MRPS9/MRPL50/MRPS35/MRPS33/MRPS10/MRPL45/NDUFAB1/MRPL41/MRPL49/MRPS6  
.3/MRPS9/MRPL50/MRPS35/MRPS33/MRPS10/MRPL45/NDUFAB1/MRPL41/MRPL49/MRPS6

'GES2/GYG1/ARHGAP9/HK3/CCT2/HSP90AB1/DYNC1H1/ILF2/AMPD3/NPC2/HYOU1/GPI/PA2G4/SEF  
'BLOC1S4/LASP1/GPSM2/FLOT1/TUBB4A/CAP1/CAPZA1/RTKN/GYPC/PHLDB1/HCLS1/GLRX3/ACTB/  
'P6VOD1/MAPT/KCNAB2/ARPC5/STMN2/HSP90AA1/DNM2/AAK1/RAB3A/LMTK2/ZPR1/TUBB3/KIF20E

D18/MED27/FBXO45/TRIM21/TRPC4AP/KLHL21/UBE2D2/GLMN/RNF8/DCAF7/MED7/FBXL7/UBE2N/

11/TNP1

GES2/GYG1/ARHGAP9/HK3/CCT2/HSP90AB1/DYNC1H1/ILF2/AMPD3/NPC2/HYOU1/GPI/PA2G4/SEF

2E2/VAC14/CDK5R1/POLR2I/POLR2J/ATG13/POLR2D/PRKAG1/PIK3R5/SOCS7/WDR41/PHKA2/GTF

/NIN/DPYSL3/PI4K2A/PREX1/CALM3/CIB1/KLC1/CNR1/PPP1R9A/UTRN/ADGRL1/KIF5B/TIAM2/F

L51/MRPL11/COA3/NDUFS8/MRPL15/C12orf65/MTX2/MRPL4/NDUFA1/NDUFA8/MFN1/UQCRB/MRPS

IP1A/WDR91/CCZ1/MYO5A/M6PR/RUBCN/STX7/VAMP8/PSAP/VPS35/LTV1/FIG4/MCOLN3/CCZ1B/VAPB/AP1/KIF21B/GIPC1/DTNBP1/TIMP2/PLXDC1/TRAPPC4/NDN/MAP2/FLOT2/ABHD12/GNAZ/RGS14/S

/PREX1/CALM3/CIB1/KLC1/CNR1/PPP1R9A/UTRN/ADGRL1/KIF5B/TIAM2/FKBP15/WHRN/DOCK7/T

IL17/SEMA4F/SH3GL1/RPS19/RPLP0/RPL23/EPB41L3/RPL38/NSF/HNRNPA3/RHEB/KCNAB2/TANC2

A/TMUB1/PDIA3/ATP11A/RAB13/SLC9A6/SLC9A9/VPS16/ATP9A/RAB8B/CD22/GPR161/SYT11/HI

PRIN1/HNRNPL/POLR2D/DHX9/EDC4/CNOT3/LSM1/KHSRP/HAX1/RPTOR/PABPC1L/LARP1/YTHDF2/  
;/PRKCI/SYT1/PPFIA3/SH3GL1/AP3D1/STX4/MYO5A/CSPG5/HTR3A/GABRD/TANC2/VCP/RNF216/I

S19/RPLP0/RPL23/EPB41L3/RPL38/NSF/HNRNPA3/RHEB/KCNAB2/TANC2/PALM/PRR12/DBNL/SRC

LC8B1/SYS1/TMEM11/RAB3A/LBR/SYNE4/SLC35B1/SLC35A4/ZDHHC9/ERGIC3/ABHD17A/COA1/RA

IDAC2/PHF21A/KDM1A/MITF/HMG4/HCF1/EHMT2/SSRP1/ACTB/MTA2/WDHD1/NCAPH2/CBX4/NPM2  
:04/PPARD/NOC2L/MED15/HEYL/HTATIP2/KDM1A/ATN1/MED8/KMT5A/HCF1/CBFB/BUD31/MTA2/M  
/PRKX/FGFR4/EPHB6/CAD/DYRK2/CSNK1E/MARK2/EPHB3/RPS6KA4/FGFR1/PIM2/CCNO/FGFR3/PA  
T1/MYL6B/CARD10/RGS14/PLEC/LAMC2/CD3E/RPL36A/MRPL17/LAMA5/UPF3B/TUBB6/TUBA1A/TU  
RHGEF19/TBC1D1/RIN1/MARK2/ARHGAP39/GDI1/PSME3/ARFGAP1/MT3/TBC1D10B/NCKAP1L/MLST  
HGEF2/KLC2/NCK2/REEP4/NME1/VASP/PRNP/TRIM54/USH1C/KIF11/NUP62/CCT5/SPAG5/FHL3/M  
.PK2/STK17A/BRK1/PKDC/PDGFRL/PTK7/PRKDC/DGKZ/MAPK3/MAST2/MAP2K2/PAK1/PRKX/FGFF  
IOG/TUBB4B/KIF12/CD320/GBP5/GNA15/RAN/RAB34/KIF3C/KIF18A/MCM5/RHOQ/KIF21B/ATP6VC  
IOG/TUBB4B/KIF12/CD320/GBP5/GNA15/RAN/RAB34/KIF3C/KIF18A/MCM5/RHOQ/KIF21B/ATP6VC  
IOG/TUBB4B/KIF12/CD320/GBP5/GNA15/RAN/RAB34/KIF3C/KIF18A/MCM5/RHOQ/KIF21B/ATP6VC  
4B/KIF12/CD320/GBP5/GNA15/RAN/RAB34/KIF3C/KIF18A/MCM5/RHOQ/KIF21B/ATP6V0B/RRAD/  
.PK8IP2/DLG3/HDAC7/EZR/CDKN2D/RHOQ/HSF1/PRMT1/RHOQ/DOK2/TRAF2/TRIM6/TCF3/RHOQ/SI  
F1/PRMT1/RHOQ/DOK2/TRAF2/TRIM6/TCF3/RHOQ/SLC12A2/MAPKAPK2/FAM83D/MSN/BRK1/IQG  
P2/IQGAP1/FAM189B/CARD10/SH3PXD2B/PRKDC/SIGLEC10/HIF1A/LSM4/HSPA8/FZD1/TRIM11/C  
/CHML/NCAPH/PRKCD/SERPINI1/HSPB1/ITIH5/B3GAT3/ADAP1/PLCB1/DEPDC1/PIF1/GMIP/CD1C  
AN/RANGAP1/GIPC1/FSCN1/ATIC/TIMP2/CHMP4B/WASF2/COL5A1/MFGE8/ITGA5/MSN/BZW2/PRDX  
BX1/DENND2D/ARHGEF19/NXT1/TBC1D1/RIN1/GDI1/XPO6/CSE1L/TBC1D10B/EEF1D/DVL3/CYTH2  
'/PPP1R9B/TIGD5/ARPC3/WIPF1/LIMCH1/PDLIM3/CORO1B/ABLIM2/HIP1R/LASP1/FERMT1/TNNI2  
IUNK/MAP3K14/GSK3A/CDK18/NUAK2/TNIK/CIT/PLK4/STK32C/LMTK3/CDK7/PRKD2/STK10/PRKCI  
1H1/XRCC3/MYO19/ATP13A1/ERCC6L/RFC2/DDX11/KIFC2/BLM/ATP6V1H/KIF14/ATP6V1E1/KIFC  
./TBC1D10B/DVL3/EHD1/NCKAP1L/SYTL1/PAK4/ARHGAP1/RTKN/RANGRF/DAPK3/ARHGDIB/KPNB1/  
./TBC1D10B/DVL3/EHD1/NCKAP1L/SYTL1/PAK4/ARHGAP1/RTKN/RANGRF/DAPK3/ARHGDIB/KPNB1/

A3/PFN1/ARHGAP30/AGFG1/ABR/SIPA1L3/CDC42SE1/DNAJC10/BAG3/SYDE1/RUNDC1/LLGL1/ARF  
PN6/BEX4/AGBL5/KIFC2/TPPP3/GAS2L1/KIF14/CAMSAP2/HSPH1/LYN/B9D2/KIFC3/VBP1/KIF15  
DH6/RPS2/HSP90AB1/STAT1/PUF60/PLCB3/CDH11/MARK2/KRT18/PPP1CA/CORO1B/UNC45A/EEF1  
1/GNG5/GNB2/RAP2A/GNB1/NRAS/EIF2S3/DIRAS2/RAB10/TUBB2B/TUBG2/ARF4/RHEBL1/GNL2/F  
RB2/TGFB3/CXCL11/XCL2/TLR5/CCRL2/FADD/ECM1/TIMM50/CCL3/PIDD1/TRIP6/TRADD/GDF11/  
42SE1/SYDE1/RUNDC1/LLGL1/ARHGAP18/RANBP1/AGAP1/CDC42EP2/MY09B/OCRL/DNM1L/PGAM5/  
MY09B/OCRL/DNM1L/PGAM5/ARHGDIA/RIC8A/RGS3/TBC1D10C/RASAL3/TBC1D22A/CHN1/TBCD/NF

7/FHDC1/CETN2/DNM1L/PPP5C/KATNB1/OGG1/NDE1/CLIP3/DRG1/MAPT/CKAP5/HOOK2/DNM2/CCS  
3/TDG/EME2/RAD1/CHD1L/TATDN2/DQX1/NBN/RAD18/ERCC1/ACTR5/RFC5/DNMT3B/DHX9/POLE3/S  
NL/CTNNA1/FLII/NEBL/ACTN1/ADD3/MY06/LIMA1/CDK5R1/TNNC1/TLN1/WIPF2/DSTN/ACTN4  
SRGAP2/ARHGEF25/ARHGEF11/PAK2/PLEKHG6/DOCK2/EPS8L1/CAV1/ATP7A/ARHGEF17/PREX1/AF  
3/GSKIP/YWHAG/ATG13/PRKAG1/RPLP1/FAF1/SH3BP5L/GMFB/EGF/RPTOR/CALM3/CIB1  
4/SARNP/ERCC1/OPTN/RAB3A/CD2AP/EML2/HSPB7/SNX17/TAF13/AP2A1/KSR1/CTBP1/ERCC3/C1  
C2/COPRS/IPO9/HPF1/CDYL/MSH6/TP53BP1/SRCAP/GRWD1/SFMBT2/PWP1/USP3/PHF1/LRWD1/IN  
PL37/RPS11/RPL22L1/RPL13A/MRPL27/MRPL28/RPL37A/MRPL51/MRPL11/RPLP1/RPL32/RPL30/

IAPC4/PPARG/KIF3A/PPP1R9A/SMG7/PXN/CD22/MFHAS1  
DAB2IP/SYNJ2/INPP5D/ARHGAP27/ARHGAP17

K6/TRIM28/POLA2/CCL5/MAPKAPK2/STK17A/BRSK1/PKDCC/PDGFRL/PTK7/PRKDC/NT5C3A/DGKZ/  
SN/EXOSC9/DXO/THOC2/MECP2/ETF1/RBMX/HNRNPA1/PPIE/RPL13A/HNRNPR/DHX9/RSL1D1/MEX3  
1/PTK2/STYXL1/PTPN1/PDLIM4/MASTL/TRPC4AP/PARD3/AP3B1/ATP2B4/ANAPC5/CDC27/HSP90E  
IX8/DHX30/MOV10/CHD7/DDX31/SNRNP200/DDX20/SLFN11/DDX51  
R12/UNG/SRP19/NOLC1/GEMIN5/ERI1/RNF135/EIF1/C1QBP/SRP72

1/PRKAR1B/DAXX/STK3/GSKIP/YWHAG/ATG13/PRKAG1/PIK3R5/SOCS7/RPLP1/FAF1/SH3BP5L/PI

OGFRL/PTK7/PRKDC/NT5C3A/DGKZ/MAPK3/MAST2/MAP2K2/PAK1/PRKX/FGFR4/HK3/EPHB6/CAD/DC  
B2/CALR/DNM1L/RBX1/IKBKG/RPL23/ABI2/UBE2L6/ZNF675/RALB/RPA2/CUL4B/NAE1/UBXN1/H  
K1/MAPT/PDCD6/KHDRBS1/CHN1/COL11A1/TRADD/WWC1/MPP7/BICD1/MAP1A/MAVS/OPTN/SH3BGF

.BKG/RPL23/ABI2/UBE2L6/ZNF675/RALB/RPA2/CUL4B/NAE1/UBXN1/HSPD1/SLC25A5/ZNF746/VC

IBB4A/RTKN/RAB20/FKBP4/RAC1/EHD2/RAP2A/NRAS/EIF2S3/DIRAS2/RAB10/DYNC1LI1/TUBB2B/  
IBB4A/RTKN/RAB20/FKBP4/RAC1/EHD2/RAP2A/NRAS/EIF2S3/DIRAS2/RAB10/DYNC1LI1/TUBB2B/

AB20/FKBP4/RAC1/EHD2/RAP2A/NRAS/EIF2S3/DIRAS2/RAB10/DYNC1LI1/TUBB2B/TUBG2/ARL16  
AB20/FKBP4/RAC1/EHD2/RAP2A/NRAS/EIF2S3/DIRAS2/RAB10/DYNC1LI1/TUBB2B/TUBG2/ARL16

IPI1/ZFYVE19/GOLPH3L/MITD1/TECPR1/PLD2/SESTD1/PARD3/TLN1/SNX17/HS1BP3/SNX22/SNX

FKBP4/RAC1/EHD2/RAP2A/NRAS/EIF2S3/DIRAS2/RAB10/TUBB2B/TUBG2/ARL16/ARF4/RHEBL1/C  
19/CDYL/CAV2/FRMD4A/CAV1/RPTOR/CNKSRI/ACTR1A/STUB1/DDB1/STAM/DDX20/ANXA1/ERCC2/

BP/JAG2/CCL2/TXLNA/CXCL9/CXCL3/CXCL13/JAG1/WNT7B/CCL28/GAST/IL1B/CDK5/PDGFA/TNF

2/ADPRH/IFT20/STXBP5/WDR41/SH3BP5L/SGSM1/YIPF1/LLGL2/EVI5L/KIF3A/TBC1D20/MADD/U

AB20/FKBP4/RAC1/EHD2/RAP2A/NRAS/EIF2S3/DIRAS2/RAB10/DYNC1LI1/TUBB2B/TUBG2/ARL16  
AB20/FKBP4/RAC1/EHD2/RAP2A/NRAS/EIF2S3/DIRAS2/RAB10/DYNC1LI1/TUBB2B/TUBG2/ARL16

IT2/E2F4/NCAPG2/ZNF703/PPARD/LEF1/FBL/GAS2L1/BCL3/SRI/NOC2L/CPNE1/SIX2/HEYL/DAPK

/RNF4/TFAP2A/NFYC/MED12/RERE/POU2AF1/TAF12/RARG/ABL1/MTA3/NFATC4/CIITA/WWC1/SFF  
LR2K/DDX54/POLR3D/POLR3H/POLR3C/EXOSC3/REX02/FARSA/CPSF3/DDX23/DQX1/DUS2/BMT2/F



!;/ADRA2A/GAL/CCRL2/SH3GL1/WNT4/CCL3/PALM/ARAP1/PSAP/DNM2/VPS35/BICD1/ARHGEF11/GN  
'CENPJ/TCERG1/DAXX/DNMT3B/DMAP1/CTBP1/CDYL/UXT/TLE6/CCAR1/LDB1/SFMBT2/SRSF2/SIN3

;/OR7E24/OR10J1/OR1D2/OR1D4/OR10G8/OR51G1/OR5F1/OR7A10/OR5P2/OR10T2/OR4C46/OR10F

'CXCL13/JAG1/WNT7B/CCL28/GAST/IL1B/PDGFA/TNFSF13B/CCL4/TGFB2/CALCA/CXCL16/IL15/I

'6VOE1/CDK7/MSH2/RBBP4/ABCA3/TTF2/DNAL4/POLQ/KATNB1/ABCC10/CCT8/ATP6VOD1/NSF/ABC

13/NOSIP/RNF7/TRIM71/TRIM25/ZNF598/UBE20/RNF122/MED12/PRPF19/PELI3/TRAF7/KLHL42/

IC/NFKB2/CREB3/FOXK1/HIF1A/MND1/RBBP8/MNDA/PCNA/SMARCA4/ZNF93/ACTL6A/ETV7/IRF1/I

NA5/STIL/RGS14/MAP1S/CENPE/CHD3/PPP2R1A/PAK1/NPM1/CHMP4C/BRCA1/TUBB6/XRCC2/TUBB  
2/AURKA/GPNMB/UNC119/PSRC1/HMMR/NCAPD2/TYMS/CDC25C/DTL/SLK3/FLNA/SPC25/CEP131/CI  
D2/RHOG/FMNL1/CRMP1/CFL1/MICALL2/RHOQ/S100A10/DOK2/DTNBP1/LINGO1/CARMIL1/WASF2/  
3/JAK3/HMOX1/CD86/MAPKAPK2/NUTF2/MIF/ZP3/IQGAP1/HLA-DPB1/PRKDC/NFKB2/CD2/EBI3/HI  
2/NUTF2/MIF/ZP3/IQGAP1/HLA-DPB1/PRKDC/NFKB2/CD2/EBI3/HIF1A/MAPK3/CD276/SERPINE1/  
3/POLR3K/POLR2H/IRF7/BCL3/FERMT1/FLOT1/ADAM8/HDAC2/ATF4/FRMD8/SLC11A1/CARD11/GPF  
SME3/SLC9A3R1/DVL3/JAG2/PLEKHA4/SIX2/FZD2/MKKS/JAG1/WNT7B/TNC/RAC1/PSMB4/KDM5B/  
ATAD3B/CHIT1/PSMD14/TIMP2/JAK3/SYNGR1/HMOX1/CD86/APBB1IP/DNAJC5/HSPA6/DDOST/SEM  
4/ATAD3B/CHIT1/PSMD14/TIMP2/SYNGR1/HMOX1/CCL5/DNAJC5/HSPA6/DDOST/ALOX5/PLEKHO2/  
300A/CANT1/IQGAP1/CFD/FTH1/STXB2/PSMD2/ITGAX/HSPA8/NEU1/GM2A/TCIRG1/SLPI/FUCA2/  
AX/HSPA8/NEU1/GM2A/TCIRG1/SLPI/FUCA2/CD63/DOK3/STK11IP/RNASET2/FPR1/MNDA/PTGES2  
ATAD3B/CHIT1/PSMD14/TIMP2/JAK3/SYNGR1/HMOX1/CD86/APBB1IP/DNAJC5/HSPA6/DDOST/SEM  
4B/GRN/TNFAIP6/CD53/PLAU/TFRC/ATAD3B/TRAFF2/CHIT1/PSMD14/TIMP2/JAK3/SYNGR1/HMOX1  
ID2/ITGAX/HSPA8/NEU1/GM2A/TCIRG1/SLPI/FUCA2/CD63/DOK3/STK11IP/RNASET2/FPR1/MNDA/  
F1A/JMJD6/MAPK3/IL27RA/CD3E/TCIRG1/ATP6AP1/SASH3/ISG15/TPD52/PRKX/UBASH3B/CD246  
C3H12A/SNX10/BCL3/LAG3/NCKAP1L/JAG2/ADAM8/PRR7/EVI2B/PIK3CD/KDELRL1/HCLS1/FANCA/  
DRA/MUC1/EZR/HLA-DQB1/HMGB3/VTCN1/CD320/GBP5/PRMT1/CARD9/PSMB9/TFRC/HLA-DPA1/HI  
3/C3AR1/HSP90AB1/F2RL1/ARPC2/RAB7B/LRRC14/CTLA4/ARPC3/WIPF1/NPLOC4/PSMB2/SH2B2/  
SCR1/CD209/LYN/HLA-DRB5/CARD11/FPR3/MUC3A/RAC1/CBFB/PSMB4/ACTB/BCAR1/CD47/PSMB8  
HMGB3/CHEK1/NPAS2/RAN/HSF1/RHNO1/NABP2/GINS3/CCT6A/MCM5/TFRC/PSMC3IP/AP5Z1/APOE  
2/DDX11/REXO4/POLR2H/PNKP/OTUB1/BLM/NONO/AUNIP/CDK2/KDM1A/FANCA/LIG1/SSRP1/WDHI  
CBX3/MT3/OTUB1/NOC2L/SCMH1/ITGB3BP/DAPK3/HDAC2/CDK2/PHF21A/KDM1A/NASP/CHAC1/KM  
3L/ZC3H12A/TXNL4A/NCBP2/USB1/DDX27/SNRPF/NOP2/GTPBP4/NHP2/PUS1/LSM7/POP7/NONO/LS  
RPL39/RPL35A/FARSB/MRPL13/GCN1/CDC123/EIF4A3/ILF3/GRB7/ZNF706/RPS3/SAMD4B/RPL27  
00A8/LYZ/GIT1/NME2/F13A1/YKT6/CTSA/SYNGR2/TRPM2/SCRIB/QPCT/RHOG/ISLR/TUBB4B/GRN  
L26/MIF/DOK1/EFNA5/CREB3/MAPK3/EFNB1/SERPINE1/JAML/NRCAM/FPR1/ZNF580/PALLD/C3AF  
IGB2/HMOX1/TRIM28/BAX/MAPKAPK2/SIRT6/FAAP24/MIF/PCBP4/CASP2/FANCG/BRSK1/WDR76/GI  
11/KIF3C/SAC3D1/KIF18A/CRMP1/KIF21B/DTNBP1/CHMP4B/ESPL1/GAS2L3/NCKAP5L/MAP2/FLOT1  
PSMB9/PSMD14/TIMP2/CHMP4B/ESPL1/BAX/LCMT1/NAA10/PCBP4/CASP2/BRSK1/IQGAP1/MIIP/F  
HLH/ASPM/CDC7/LAMC1/FZD7/RHOG/PRAME/VTCN1/COMP/CD320/GRN/HSF1/PRMT1/AKR1C3/TFRC  
F2/PRPF6/POLR2L/DDX41/SF3A3/CPSF4/POLR2K/DNAJC8/FUS/ZBTB80S/CWC27/SNRPG/RBM17/F  
0/PSMD11/PSMD1/GPX1/PSMA7/UBE2E1/FBXL6/DNAJC10/PSMB3/UBE2A/SMARCC1/ARRB2/KCTD2/  
4/CDC7/TUBB4B/CHEK1/RHNO1/PRMT1/PSMB9/GIPC1/PSMD14/CHMP4B/ESPL1/BAX/FAM83D/MIF/I  
ACD/BAIAP2L1/BRCA1/NSMCE2/FCHSD1/BMF/BIN1/CCT2/LMNA/F2RL1/ARPC2/DYNLL1/DYNC1H1/  
3/NUPR1/PPP2R1A/PEA15/CAPN10/MNDA/NSMAF/BMF/BIN1/CD248/ARHGEF19/E2F3/PSENEN/CTLA  
4/SLPI/ISG15/NPM1/CHMP4C/TNFRSF4/RBL1/POLR2G/PCNA/ITGB5/SMARCA4/PPIH/TRIM59/PDCL  
3/ME3/NCBP2/SNRPF/RPL17/RPLP2/PUS1/CNOT9/LSM7/NONO/RPSA/ATF4/LSM10/U2AF2/SF3B5/KI  
2/KAT2A/BEND3/MTF2/ATXN7L3/CBX8/HELLS/PCGF2/PPP5C/TBL1XR1/DR1/PRDM4/VRK1/CXXC1/C  
4/LTB/TNFRSF18/FSCN1/TRAFF2/RBCK1/PSMD14/TRIM6/JAK3/HMOX1/CCL5/CD86/VAV1/CXCR4/AI  
A4/MRPS12/PELO/F2RL1/MRPL47/MARK2/DDIT4/PPP1CA/MRPL9/DVL3/FLOT1/ADAM8/MRPS23/C  
4/BYSL/RPL35A/LYAR/RRP36/CPSF6/EIF4A3/ISG20/GRB7/RUVBL2/PRPF3/EXOSC5/SNU13/PRPF6  
/IPF3/LIMK2/CARMIL1/WASF2/RHOC/PLEKHG2/GAS2L3/CCL26/PHPT1/TPM2/ARPC4/MYL6B/PTK7/  
1/UNC119B/EHD1/HAUS1/NCKAP1L/SPAG1/RSPH1/TUBB4A/CSNK1D/DNAAF5/MKKS/TBC1D30/DCTN2  
RHOC/PLEKHG2/GAS2L3/CCL26/PHPT1/TPM2/ARPC4/PTK7/SH3PXD2B/SLC9A1/EFNA5/MAD2L2/LC  
5/TPD52/PRKX/UBASH3B/SOCS1/IRF1/F2RL1/STAT1/RAB7B/RRS1/RRAS/HDAC1/CTLA4/TNFRSF1  
11/PARP1/IL15/PTBP3/LTBR/LOX/MB/BATF3/DNASE2/SBNO2/CDC42/APP/HOXB7/PABPC4/LILRB4  
A-DPA1/HLA-DMB/TNFRSF18/VSIG4/CARMIL1/JAK3/CCL5/CD86/APBB1IP/VAV1/CXCR4/ITGA5/1  
IN/HM13/GNA12/ISG15/CHMP4C/PDCL3/HGS/DDA1/HSP90AB1/NPLOC4/CSNK1E/MAN1B1/ODC1/PS  
1/IGFBP3/TNFRSF18/ARHGEF39/CARMIL1/HMOX1/RHOC/BDKRB1/CCL5/CXCR4/SEMA4A/CCL26/ITC  
ID2/GRN/CRMP1/PRMT1/CFL1/MICALL2/DOK2/DTNBP1/LINGO1/AREG/P3H1/TRAPPC4/CXCR4/SEMA

BP2/ANKRD27/NRCAM/THY1/CORO1C/RTN4RL2/F2RL1/ARPC2/DYNLL1/RELN/ZSWIM5/MARK2/GDI1  
'BP/PSME3/HSPBP1/UBE2J2/NPEPPS/OTUB1/DTX2/FBXO5/GTPBP4/PRR7/TRIM31/ANAPC7/SPSB1/  
'CSF1R/EZR/ANKRD1/SLC25A6/RHOG/VTCN1/RAN/GLIS2/RAB11FIP5/ANXA13/CCT6A/MICALL2/R/  
.L1/TOMM34/AP4M1/PES1/DKC1/SEC61G/ACD/GDAP1/TIMM17B/MCRS1/BMF/HGS/CCT2/YBX1/RPS2  
;/CARMIL1/SNRPD1/PLEKHG2/CCL26/MAP2/FKBP1A/GMNN/CLTA/ARPC4/MRTO4/EFNA5/SF3A2/RUV  
.R2G/HK3/YBX1/RPS2/PDE7A/PELO/TPI1/PABPC1/FOXK2/AMPD3/NUP93/NUP205/NUP37/RNPS1/F  
/SPH6/BYSL/RPL35A/LYAR/INTS1/USP14/FARSB/RNF113A/SMARCB1/RRP36/EIF4A3/ISG20/CDK7  
) /FTH1/STXBP2/PSMD2/ITGAX/HSPA8/NEU1/GM2A/TCIRG1/SLPI/FUCA2/CD63/DOK3/STK11IP/RN  
'OL3A1/GRN/TNFAIP6/GLIPR2/MGAT5/PLAU/IGFBP3/TNFRSF18/ARHGEF39/CARMIL1/CHMP4B/HMC  
IAPK3/ITGAX/DUOX2/LAMC2/P2RY6/SERPINE1/PAK1/CHMP4C/ZNF580/THY1/DUOX2/C3AR1/F2RL  
;/IRF1/F2RL1/CTLA4/CD83/PLA2G2D/PRELID1/LEF1/PDCD1/ZC3H12A/BCL3/LAG3/SIRPG/NCK/  
) /FTH1/STXBP2/PSMD2/ITGAX/HSPA8/NEU1/GM2A/TCIRG1/SLPI/FUCA2/CD63/DOK3/STK11IP/RN  
.L26/MIF/DOK1/EFNA5/CREB3/MAPK3/EFNB1/SERPINE1/JAML/NRCAM/FPR1/ZNF580/PALLD/C3AF  
;/EIF2S3/DENR/RPL39/RPL35A/FARSB/MRPL13/GCN1/CDC123/EIF4A3/ILF3/GRB7/ZNF706/RPS2  
/PN10/MNDA/NSMAF/BMF/BIN1/CD248/ARHGEF19/E2F3/PSENEN/CTLA4/PRMT2/S100B/SORT1/RNF  
/F18/TRAF2/HNF1B/HMGB2/YBX3/JAK3/HMOX1/ATAD3A/CCL5/BAX/DNAJC5/ITGA5/MIF/BEX3/CAS  
/PN10/MNDA/NSMAF/BMF/BIN1/CD248/ARHGEF19/E2F3/PSENEN/CTLA4/PRMT2/S100B/SORT1/RNF  
/F18/TRAF2/RBCK1/HNF1B/HMGB2/YBX3/JAK3/HMOX1/ATAD3A/CCL5/BAX/DNAJC5/ITGA5/MIF/BI  
/E2A/SMARCC1/ARRB2/KCTD2/PSMD4/PSMD3/RBX1/PSMD7/TMUB2/TBL1XR1/PELI1/SGTB/RNF4/R/  
'LEKHG2/RABEP2/BAX/SEMA4A/SIRT6/CCL26/MAP2/LCMT1/MSN/IQGAP1/SRPX2/ARPC4/AMIGO2/S  
/IB/TPBG/HIP1R/BID/TPPP3/GPSM2/FLOT1/NCKAP1L/PIP4K2A/CXCL13/SNF8/PHLDB1/PMAIP1/1  
'RPL36A/UBE2I/SLPI/FUCA2/ISG15/NPM1/CHMP4C/TNFRSF4/RBL1/POLR2G/PCNA/ITGB5/SMARCB  
/SPA8/TRIM11/EIF3B/RPL36A/UBE2I/SLPI/FUCA2/ISG15/NPM1/CHMP4C/TNFRSF4/RBL1/POLR2G/  
/SG/COL16A1/ZNF296/SPAG4/SLC26A6/TNFAIP6/HSF1/KIF18A/WIPF3/LIMK2/CCT3/HMGB2/YBX3  
'CHEK1/PRMT1/PSMB9/MCM5/PSMD14/CHMP4B/ESPL1/POLA2/BAX/FAM83D/BCAT1/LCMT1/PCBP4/C  
'/I3A1/CTSA/SYNGR2/TRPM2/SCRIB/QPCT/RHOG/ISLR/TUBB4B/GRN/TNFAIP6/RAB11FIP5/CD53/F  
'TUBB4B/TNFAIP8L2/GRN/GBP5/NCF1/CARD9/PSMB9/HLA-DPA1/VSIG4/CTSK/APOBEC3C/PSMD14/  
/9/LYN/CARD11/MUC3A/PSMB4/CTSS/PSMB8/PSMB10/FGR/PSMA5/CD300LF/NRAS/SFPQ/PQBP1/P1  
.IPR2/PRMT1/S100A10/IGFBP3/HMGB2/CARMIL1/TIMP2/TCF3/P3H1/CD86/CXCR4/TNFSF9/PKDC  
/C/TAF6/PEA15/NPM1/RBBP8/CHMP4C/BRCA1/RBL1/PCNA/BIN1/IRF1/PPM1G/CTDSPL/HSP90AB1/  
/L/MAPK3/MAP2K2/CENPE/PPP2R1A/PAK1/PEA15/NPM1/SPRED1/FPR1/RAP2B/THY1/CORO1C/UBASH  
.F/FKBP1A/CD300A/FLOT2/MSN/PRDX1/ZP3/HLA-DPB1/PRKDC/CD2/EBI3/MAD2L2/JMJD6/CD276/  
/SPL1/LCMT1/NAA10/SGO2/MAD2L2/MND1/CENPE/PPP2R1A/GDAP1/CHMP4C/NSMCE2/SGO1/MSTO1/  
/E/TCIRG1/ATP6AP1/SASH3/ISG15/TPD52/PRKX/UBASH3B/CD248/SOCS1/IRF1/F2RL1/STAT1/R/  
./ARHGEF19/LZTS2/PLOD3/PSMB2/PPP1CA/LEF1/FGFR1/TGM2/PSME3/SLC9A3R1/DVL3/JAG2/COI  
/IB1/IL27RA/CD3E/PAK1/SASH3/TNFRSF4/SLC39A10/MNDA/THY1/UBASH3B/SIRPA/SOCS1/IRF1/F  
IAPK3/ITGAX/SERPINE1/JAML/IL27RA/ZNF580/THY1/SIRPA/CD58/C3AR1/F2RL1/CCL13/TNFRSF  
'SEMA4A/MAP2/LCMT1/NAA10/CD300A/EFNA5/MAD2L2/NUPR1/HSPA8/ACD/NPM1/SLC35F6/ANKRD2  
/MIM22/CD151/COL3A1/GRN/TNFAIP6/GLIPR2/MGAT5/PLAU/IGFBP3/TNFRSF18/ARHGEF39/CARM  
IAPK3/ITGAX/DUOX2/LAMC2/P2RY6/SERPINE1/PAK1/ZNF580/THY1/DUOX2/C3AR1/F2RL1/RELN/  
/IBP1/TNFAIP8L3/TRAF2/CCL5/MAPKAPK2/CXCR4/PHPT1/MIF/CD300A/IQGAP1/CARD10/EFNA5/DC  
/BEX3/MTCL1/IQGAP1/RGS14/MAPK3/GM2A/P2RY6/PERP/SLC39A10/ANKRD27/PCNA/THY1/ARHG/  
;/STIL/MAPK3/MAP1S/PAK1/NPM1/BAIAP2L1/CHMP4C/BRCA1/FCHSD1/RHOF/BIN1/F2RL1/ARPC2/  
/AB15/STXBP2/SSNA1/HIF1A/SYT8/MAP1S/CENPE/ATP6AP1/PPP2R1A/NPM1/CHMP4C/STX1A/TUB/  
'GFA/RRS1/TMED9/PIP5K1C/SLC9A3R1/BLOC1S4/DYNLT1/GPSM2/PIK3CD/CSNK1D/MKKS/KIF14/f  
./CXCR4/SEMA4A/MAP2/BRSK1/IQGAP1/SRPX2/PTK7/AMIGO2/EFNA5/SF3A2/IL34/RGS14/HIF1A/  
'HB3/NUMBL/TPBG/FGFR1/MYRF/DYNLT1/DVL3/VLDLR/CPNE1/HEYL/HDAC2/CSNK1D/KDM1A/LYN/C  
.HE41/LINGO1/HMGB2/CARMIL1/TIMP2/TCF3/P3H1/CXCR4/SEMA4A/MAP2/BRSK1/IQGAP1/PTK7/F  
;/CCT6A/MICALL2/RANGAP1/RHOQ/GIPC1/EPB41L2/DTNBP1/GPD1L/CCT3/SAE1/HMOX1/TRIM28/F  
/ME/VTCN1/CREB3L1/COMP/GRN/NPAS2/RPS6KA1/HSF1/CFL1/TNFRSF18/TRAF2/RBCK1/HNF1B/HM  
ISPA8/GLTP/MICALL1/PPP2R1A/ATP8B2/BAIAP2L1/CHMP4C/SLC35F6/ANKRD27/NRCAM/STX1A/GI

PS2/HSP90AB1/FOXK2/TSPAN17/NUP93/NUP205/NUP37/PSMB2/NDC1/NUP188/ZC3H12A/SVBP/PS  
RCA1/TUBA1A/TTL1/HGS/SFI1/DYNLRB1/IFT52/MSTO1/DYNLL1/DYNC1H1/RAB7B/RRS1/CSNK1E  
3/HGS/SLC51B/NPC1/RPS2/CNPY4/RELN/GDI1/KRT18/SLC9A3R1/BID/RPL17/FLOT1/RPLP2/HSP  
K1/NPM1/SPRED1/BRCA1/RBL1/PCNA/THY1/BCL2L12/SIRPA/NOL3/HSP90AB1/F2RL1/PARPBP/TN  
LEKHG2/COL5A1/NCKAP5L/CCL26/MAP2/FKBP1A/TPM2/ARPC4/SH3PXD2B/SLC9A1/MAD2L2/HSPA8  
/HLA-DPA1/HLA-DMB/VSIG4/JAK3/CCL5/CD86/VAV1/ITGA5/TNFSF9/CD300A/SELPLG/FLOT2/MC  
EHD1/HAUS1/SPAG1/RSPH1/TUBB4A/CSNK1D/DNAAF5/MKKS/TBC1D30/DCTN2/RAC1/MIEN1/B9D2/  
NKR2D7/NRCAM/THY1/CORO1C/RTN4RL2/F2RL1/ARPC2/DYNLL1/RELN/ZSWIM5/MARK2/GDI1/EPHE  
CA1/RBL1/NSMCE2/PCNA/TUBA1A/SFI1/CTDSPL/DYNLL1/DYNC1H1/SPDL1/XRCC3/TICRR/KNTC1/  
IMR/NCAPD2/TYMS/CDC25C/DTL/FLNA/SPC25/CEP131/CDKN2A/MCM6/TUBG1/RACGAP1/EIF4EBP1/  
PSMA5/PTPN6/PSMD13/CD27/PSMC4/CCR1/IL12RB1/CYP26B1/IL15/PSMD10/PSMD11/PSMD1/LO  
ICRS1/STX6/SLC51B/CCT2/LMNA/HSP90AB1/CNPY4/CSNK1E/LZTS2/GDI1/ZC3H12A/BID/CCT4/BC  
/GRN/TNFAIP6/GLIPR2/MGAT5/PLAU/IGFBP3/TNFRSF18/ARHGEF39/CARMIL1/HMOX1/RHOC/BDKF  
UOXA2/LAMC2/P2RY6/SERPINE1/PAK1/ZNF580/THY1/DUOX2/C3AR1/F2RL1/RELN/ZNF703/LEF1/  
RPF31/ZMAT5/SNRPB2/PRPF19/SART1/SYMPK/PHF5A/SRPK1/RBM42/CPSF3/DDX23/PTBP1/PRPF3  
RPF31/ZMAT5/SNRPB2/PRPF19/SART1/SYMPK/PHF5A/SRPK1/RBM42/CPSF3/DDX23/PTBP1/PRPF3  
RPF31/ZMAT5/SNRPB2/PRPF19/SART1/SYMPK/PHF5A/SRPK1/RBM42/CPSF3/DDX23/PTBP1/PRPF3  
13/PSMC4/ASCL2/PML/PSMD10/PSMD11/ERO1A/PSMD1/MB/PSMA7/PSMB3/TGFB3/PSMD4/DNM1L/F  
IT1/IQGAP1/CFD/FTH1/STXBP2/PSMD2/ITGAX/HSPA8/NEU1/GM2A/TCIRG1/SLPI/FUCA2/CD63/DC  
IFRSF4/SLC39A10/MNDA/THY1/SIRPA/SOCS1/IRF1/F2RL1/CTLA4/CD83/PLA2G2D/PRELID1/PDCI  
1/IRF3/C3AR1/HSP90AB1/F2RL1/ARPC2/RAB7B/LRRC14/CTLA4/ARPC3/WIPF1/NPLOC4/PSMB2/S  
SRRT/TTF2/PRPF6/BARD1/POLR2L/DDX41/SF3A3/CPSF4/APP/POLR2K/DNAJC8/FUS/CWC27/SNRF  
L/NUP107/RPL23/SNRPG/PTTG1IP/SLBP/KHDRBS1/CHTOP/SEC13/IP013/PKIA/EMD/SYMPK/CPSF3  
AP1L/ADAM8/CCL2/HSPH1/CD209/LYN/CCL28/CARD11/RAC1/CBFB/IL1B/IL2RA/CD47/TNFSF13F  
RHOF/RAB3B/F2RL1/RAB7B/RRAS/ARHGEF19/RELN/ARHGAP39/GDI1/SH2B2/RAB35/ARFGAP1/RAE  
G3/PSMB8/PSMB10/PSMA5/EIF2S3/PSMD13/NUP85/PSMC4/NUP43/SET/PSMD10/PSMD11/MRPL13/  
I2B/CCL2/CDK2/EHMT2/PSMB4/PSMB8/PSMB10/PSMA5/PSMD13/PSMC4/PML/DYNC1L1/PSMD10/PS  
NF157/PLXND1/GSK3A/NDRG4/TNIK/TUBB2B/DVL2/INPP5J/NSMF/LRP8/DGUOK/SEMA4B/PRKCI/F  
1/COL5A2/FLOT1/ADAM8/COL6A3/CAPN1/PHLDB1/TNC/ITGA2/CAPNS1/CTSS/PDGFA/CD47/SPOCK  
SERPINE1/PAK1/ZNF580/THY1/C3AR1/F2RL1/RELN/ZNF703/LEF1/GPI/FGFR1/ZC3H12A/NCKAP1  
IRPL52/CKAP2/NSF/RUBCN/CKAP5/MCTS1/MRPL48/DAP3/MRPS7/MRPL53/GSPT2/VCP/STMN2/UBQ  
NAP1L2/ANAPC11/PARP1/SET/SMARCB1/PADI2/RUVBL2/PRKD2/KAT2A/ZNF207/MTF2/RAD21/RNF  
P2/HCLS1/PMAIP1/MITF/ARPC5L/ATXN2L/HCF1/FKBP4/RAC1/GBA/JCHAIN/CTTN/MYADM/WAS/C  
A/CANT1/IQGAP1/CFD/FTH1/STXBP2/PSMD2/ITGAX/HSPA8/NEU1/GM2A/TCIRG1/SLPI/FUCA2/CI  
AX/HSPA8/NEU1/GM2A/TCIRG1/SLPI/FUCA2/CD63/DOK3/STK11IP/RNASET2/FPR1/MNDA/PTGES2  
PRMT1/PSMB9/MCM5/PSMD14/CHMP4B/ESPL1/POLA2/BAX/BCAT1/LCMT1/PCBP4/CASP2/BRSK1/GM  
2/LSM10/KIF14/HCF1/RAB11FIP4/IL1B/TGFB2/SFPQ/POC1A/THOC5/PML/DYNC1L1/FGFR2/C1  
55/CALR/CPSF4/NUP107/RPL23/SNRPG/PTTG1IP/SLBP/KHDRBS1/CHTOP/SEC13/IP013/PKIA/EMI  
RE1/TUBB/CDC25A/CDK4/GIT1/MAD2L1/ASPM/CDC7/FZD7/RAN/SAC3D1/CFL1/GIPC1/EPB41L2/C  
IO/DVL3/DUSP2/BLM/MLST8/DBF4/GTPBP4/ADAM8/CDKN2B/SHC1/TESK1/LYN/WNT7B/BIRC7/CDKN  
MNA/GGCT/HDAC1/DDIAS/DYRK2/SORT1/HYOU1/PRELID1/DDIT4/KRT18/PPP1CA/PPARD/FGFR1/F  
N/MYADM/WAS/VIL1/CIT/PFN1/WASF1/INPP5J/GPX1/TACSTD2/RPS3/CAPZB/GRB2/FHOD1/CDC42  
IDRBS1/EXOSC3/SUPT5H/PRPF19/BTG2/PSMD8/PSMA1/SRPK1/MYEF2/RBM42/PTBP1/PSMB5/PSMA4  
1/IL1B/CDK5/UBE2L3/TCP1/VIL1/GSK3A/STAC3/VPS28/PARP1/YWHAQ/YWHAB/ACSL3/CROCC/BF  
3/NSF/GGA1/RAB3D/STAC/PALM/STX7/CSK/VAMP8/SYS1/VPS35/ARFRP1/OPTN/RAB3A/GGA3/TMBI  
/NAA10/SGO2/MAD2L2/MND1/CENPE/PPP2R1A/CHMP4C/NSMCE2/SGO1/MSTO1/SPDL1/XRCC3/TGF  
/LYN/HLA-DRB5/CARD11/FPR3/MUC3A/RAC1/CBFB/PSMB4/ACTB/BCAR1/CD47/PSMB8/NFAM1/PSM  
11/EIF4A3/PSMD1/ISG20/PSMA7/EXOSC5/YWHAB/RPS3/SAMD4B/PSMB3/RPL27/RNH1/DROSHA/AC  
NH1/AGO2/RPL35/RPS20/PSMD4/RPL18A/PSMD3/PABPC4/PSMD7/RPS19/NT5C3B/RPLP0/RPL18/F  
NCKAP1L/SH3KBP1/CAP1/CAPZA1/MKKS/FHOD3/HCLS1/PSTPIP1/TESK1/ITGB1BP1/ARPC5L/RAC1  
L1/ATAD2/DYNC1L1/PFN1/INPP5J/MAP4/PARP1/SET/PSMD10/SMARCB1/GPX1/TACSTD2/CAPZB/

'C3H12A/LAG3/SIRPG/FLOT1/NCKAP1L/GTPBP4/ADAM8/CCL2/CXCL13/HSPH1/JAG1/CD209/LYN/C  
'T2A/PRKCI/TGFB3/ZMYND8/SEMA4D/SYT1/CDC42EP2/DNM1L/SYT3/KATNB1/WRAP73/STK25/ARHC  
'3/HCLS1/KDM1A/WNT7B/ARPC5L/RAC1/LAMTOR5/CDK5/CTTN/MYADM/WAS/VIL1/AP2M1/CIT/PFN1/  
'54/ZBTB80S/RPS19/NOC4L/RRP7BP/TSR3/UTP11/LAS1L/UTP4/EXOSC3/NAT10/UTP6/HEATR1/S/  
'L/PSMD13/PSMC4/ASCL2/PML/OXTR/PSMD10/PSMD11/ERO1A/PSMD1/MB/PSMA7/PSMB3/TGFB3/PSM  
'NF26/CCL4/PQBP1/CHMP3/IFI16/BANF1/PML/IL12RB1/OXTR/IL15/SMARCB1/ILF3/ISG20/TFAF  
'TNFSF13B/FGR/LCK/PTPN6/CD27/IL12RB1/IL15/MSH2/RPS3/GRB2/CD6/CDC42/IL4R/PNP/LILF  
';/PML/PARP1/DONSON/TIPIN/MSH2/RPS3/USP1/PRKD2/DFFA/ARRB2/PARM1/CBX8/POLQ/FUS/BAF  
'D1/PDCD1/ZC3H12A/TNIP2/LAG3/SIRPG/NCKAP1L/ADAM8/CCL2/FANCA/HSPH1/CD209/LYN/CARI  
'AM8/NHP2/VSIG1/MKKS/CCT7/PRIM1/RAC1/ACTB/PFKM/CDK5/JCHAIN/TCP1/DNAJB2/HOMER1/C/  
'31/PSMA5/LOXL2/TGFB2/DNMT3A/PSMD13/PSMC4/ASCL2/PML/OXTR/PSMD10/PSMD11/ERO1A/PSMI  
'GTB/RPL23/RACK1/ROMO1/RPL38/NSF/RPL23A/CEMIP/ZDHHC12/GGA1/TIMM13/MFF/RPS7/CSK/F  
'NA/TUBA1A/SFI1/CTDSPL/DYNLL1/DYNC1H1/SPDL1/XRCC3/TICRR/KNTC1/PPP1R9B/E2F8/CSNK1  
';/YWHAH/BBC3/NLE1/KDM1A/PMAIP1/IL1B/WFS1/CTTN/TAF9/ZNF205/SFPQ/LCK/MAZ/GSK3A/PMI  
'LCK/PTPN6/CD27/IL12RB1/IL15/MSH2/RPS3/GRB2/CD6/CDC42/IL4R/PNP/LILRB4/AP3D1/AXL/  
'4/POLA1/BARD1/MCM8/TOPBP1/PRIM2/POLQ/RRM1/RFWD3/RBBP7/RAD9A/RPA2/POLD3/TIMELES  
'NC1H1/SPDL1/XRCC3/RRS1/BEX4/DDX11/CEP85/NUP37/INCENP/NDC1/FBXO5/KIF14/KPNB1/SMC  
'CDK2/NLE1/PSMB4/PSMB8/PSMB10/PSMA5/PSMD13/PSMC4/PML/DYNC1LI1/PRCC/PSMD10/PSMD11  
'17/TNFSF13B/LCK/PTPN6/CD27/IL12RB1/CYP26B1/IL15/RPS3/SIT1/GRB2/CD6/DROSHA/CDC42/  
'ARHGAP18/CDC42EP2/DNM1L/GMFG/ABI2/NDE1/CLIP3/DRG1/MAPT/ARPC1A/CKAP5/MZT1/BRK1/!  
';/RPS3/CD6/PNP/GAL/HELLS/FADD/BTK/PELI1/RASAL3/GPR183/WNT4/BTN2A2/ZNF335/HSPD1/!  
'MRPS7/TRAF7/NAT10/UTP6/HEATR1/MPV17L2/SART1/NOP10/KRI1/RPS7/RPL7A/WDR55/GAR1/RF  
'ALCA/CCR1/CXCL16/LOX/C5AR1/PADI2/PF4V1/PRKD2/ARRB2/CALR/CXCL11/CCR5/XCL2/CMKLR1  
'PTPN6/IL12RB1/IMPDH2/CD79A/LST1/IL15/RPS3/CD6/PNP/GAL/HELLS/FADD/BTK/PELI1/RAS/  
'FSF13B/LCK/PTPN6/CD27/IL12RB1/IL15/RPS3/GRB2/CD6/CDC42/IL4R/PNP/LILRB4/AP3D1/F/  
'IAPT/CYCS/LONP1/ABL1/STK24/MSRB3/TNFAIP3/PDCD10/PSAP/PRKAA2/DNM2  
';/PPP4C/INO80C/TIMELESS/EXOSC3/EID3/HSPD1/RAD51C/RAD51D/WRAP53/UBQLN4/EME2/SFR1/  
'CTEX1D2/SPA17/CCSAP/BICD1/HNRNPU/MAP1A/DYNC1I2/KIF20B/KIF22/ARL8B/AP3B1/IFT20/F  
'PS15/NOL6/MRPL18/HNRNPU/LTV1/SARNP/MAGOH/THOC2/XPO7/SLC35B1/SLC35A4/HNRNPA1/EIF  
'T1/NOP10/KRI1/RPS7/RPL7A/WDR55/GAR1/SEN3/RPS15/RPS16/RPL5/GTF3C5/NOL6/RPF2/BM1  
'T10/POLE3/CTBP1/SEH1L/EIF6/CNOT3/SUV39H1/POLR2E/PRKRA/MORF4L1/SND1/SPOUT1/SRCF  
'RPS15/DNM2/CTEX1D2/VPS35/NOL6/HNRNPU/LTV1/SARNP/MAGOH/RAB11A/THOC2/KLHL21/EIF  
'ERCC1/ADGRG3/CD79B/CD38/INHA/RNF8/LYL1/RBPJ/NOTCH2/DOCK10/MSH6/TP53BP1/ATAD5/TH  
'/PLK4/PSMD10/PSMD11/NES/PSMD1/DONSON/ODF2/CDK7/PSMA7/PSMB3/TOPBP1/APP/PSMD4/CE1  
'42/IL4R/PNP/LILRB4/AP3D1/AXL/FADD/BTK/PELI1/CLEC7A/RASAL3/GPR183/EXOSC3/BTN2A2/  
'A/STK25/RACK1/MSX1/RAD9A/IL20RA/MYBBP1A/PTTG1IP/GRINA/ABL1/STK24/SFRP2/RPS7/NF/  
'5/ABR/CDC42SE1/IL2RB/GRB2/CDC42/CALR/CDC42SE2/AXL/CLEC7A/RACK1/LBP/ARPC1A/RUBCN  
'HEB/BTG2/PIDD1/ABL1/CHEK2/SGSM3/PRKAA2/VASH1/THBS1/NOTCH1/NBN/PLK3/TBRG4/CRLF3/  
'3/PSMC4/AP2M1/RAB10/DYNC1LI1/AP2S1/PSMD10/PSMD11/PSMD1/KIF2A/HLA-B/PSMA7/PSMB3/  
'90AA1/PRKAA2/RPS15/EIF3M/STYXL1/RPL5/RPF2/BICD1/RPL6/PIH1D1/TARBP2/RBMX/ZRSR2/F  
'ACTR3/HSP90AA1/CHD1L/MPP7/SPIRE1/DCTN1/SH3GLB1/ERCC1/VEGFA/PIH1D1/MECP2/PPP2R5E  
'ICM8/PRIM2/MTBP/RFWD3/RPA2/CUL4B/E2F6/TRIM71/KHDRBS1/BTN2A2/BTG2/ACVR1/TAF10/PII  
'3/CD6/PNP/GAL/HELLS/FADD/BTK/PELI1/RASAL3/GPR183/WNT4/BTN2A2/ZNF335/HSPD1/ABL1/F  
'31/PKNOX1/RPS14/INPP5D/ZNF16/ADD1/PIK3CB/ACIN1/ASXL1/RPS6/CASP3/ADAR/SMAD5/BCR/!  
';/PSMD7/LILRB4/IKBK/PTPN6/CD27/IL12RB1/IL15/RPS3/GRB2/CD6/CDC42/IL4R/PNP/LILRB4/AP3D1/F/  
'IAPT/CYCS/LONP1/ABL1/STK24/MSRB3/TNFAIP3/PDCD10/PSAP/PRKAA2/DNM2  
';/PPP4C/INO80C/TIMELESS/EXOSC3/EID3/HSPD1/RAD51C/RAD51D/WRAP53/UBQLN4/EME2/SFR1/  
'CTEX1D2/SPA17/CCSAP/BICD1/HNRNPU/MAP1A/DYNC1I2/KIF20B/KIF22/ARL8B/AP3B1/IFT20/F  
'PS15/NOL6/MRPL18/HNRNPU/LTV1/SARNP/MAGOH/THOC2/XPO7/SLC35B1/SLC35A4/HNRNPA1/EIF  
'T1/NOP10/KRI1/RPS7/RPL7A/WDR55/GAR1/SEN3/RPS15/RPS16/RPL5/GTF3C5/NOL6/RPF2/BM1  
'T10/POLE3/CTBP1/SEH1L/EIF6/CNOT3/SUV39H1/POLR2E/PRKRA/MORF4L1/SND1/SPOUT1/SRCF  
'RPS15/DNM2/CTEX1D2/VPS35/NOL6/HNRNPU/LTV1/SARNP/MAGOH/RAB11A/THOC2/KLHL21/EIF  
'ERCC1/ADGRG3/CD79B/CD38/INHA/RNF8/LYL1/RBPJ/NOTCH2/DOCK10/MSH6/TP53BP1/ATAD5/TH  
'/PLK4/PSMD10/PSMD11/NES/PSMD1/DONSON/ODF2/CDK7/PSMA7/PSMB3/TOPBP1/APP/PSMD4/CE1  
'42/IL4R/PNP/LILRB4/AP3D1/AXL/FADD/BTK/PELI1/CLEC7A/RASAL3/GPR183/EXOSC3/BTN2A2/  
'A/STK25/RACK1/MSX1/RAD9A/IL20RA/MYBBP1A/PTTG1IP/GRINA/ABL1/STK24/SFRP2/RPS7/NF/  
'5/ABR/CDC42SE1/IL2RB/GRB2/CDC42/CALR/CDC42SE2/AXL/CLEC7A/RACK1/LBP/ARPC1A/RUBCN  
'HEB/BTG2/PIDD1/ABL1/CHEK2/SGSM3/PRKAA2/VASH1/THBS1/NOTCH1/NBN/PLK3/TBRG4/CRLF3/  
'3/PSMC4/AP2M1/RAB10/DYNC1LI1/AP2S1/PSMD10/PSMD11/PSMD1/KIF2A/HLA-B/PSMA7/PSMB3/  
'90AA1/PRKAA2/RPS15/EIF3M/STYXL1/RPL5/RPF2/BICD1/RPL6/PIH1D1/TARBP2/RBMX/ZRSR2/F  
'ACTR3/HSP90AA1/CHD1L/MPP7/SPIRE1/DCTN1/SH3GLB1/ERCC1/VEGFA/PIH1D1/MECP2/PPP2R5E  
'ICM8/PRIM2/MTBP/RFWD3/RPA2/CUL4B/E2F6/TRIM71/KHDRBS1/BTN2A2/BTG2/ACVR1/TAF10/PII  
'3/CD6/PNP/GAL/HELLS/FADD/BTK/PELI1/RASAL3/GPR183/WNT4/BTN2A2/ZNF335/HSPD1/ABL1/F  
'31/PKNOX1/RPS14/INPP5D/ZNF16/ADD1/PIK3CB/ACIN1/ASXL1/RPS6/CASP3/ADAR/SMAD5/BCR/!  
';/PSMD7/LILRB4/IKBK/PTPN6/CD27/IL12RB1/IL15/RPS3/GRB2/CD6/CDC42/IL4R/PNP/LILRB4/AP3D1/F/  
'IAPT/CYCS/LONP1/ABL1/STK24/MSRB3/TNFAIP3/PDCD10/PSAP/PRKAA2/DNM2  
';/PPP4C/INO80C/TIMELESS/EXOSC3/EID3/HSPD1/RAD51C/RAD51D/WRAP53/UBQLN4/EME2/SFR1/  
'CTEX1D2/SPA17/CCSAP/BICD1/HNRNPU/MAP1A/DYNC1I2/KIF20B/KIF22/ARL8B/AP3B1/IFT20/F  
'PS15/NOL6/MRPL18/HNRNPU/LTV1/SARNP/MAGOH/THOC2/XPO7/SLC35B1/SLC35A4/HNRNPA1/EIF  
'T1/NOP10/KRI1/RPS7/RPL7A/WDR55/GAR1/SEN3/RPS15/RPS16/RPL5/GTF3C5/NOL6/RPF2/BM1  
'T10/POLE3/CTBP1/SEH1L/EIF6/CNOT3/SUV39H1/POLR2E/PRKRA/MORF4L1/SND1/SPOUT1/SRCF  
'RPS15/DNM2/CTEX1D2/VPS35/NOL6/HNRNPU/LTV1/SARNP/MAGOH/RAB11A/THOC2/KLHL21/EIF  
'ERCC1/ADGRG3/CD79B/CD38/INHA/RNF8/LYL1/RBPJ/NOTCH2/DOCK10/MSH6/TP53BP1/ATAD5/TH  
'/PLK4/PSMD10/PSMD11/NES/PSMD1/DONSON/ODF2/CDK7/PSMA7/PSMB3/TOPBP1/APP/PSMD4/CE1  
'42/IL4R/PNP/LILRB4/AP3D1/AXL/FADD/BTK/PELI1/CLEC7A/RASAL3/GPR183/EXOSC3/BTN2A2/  
'A/STK25/RACK1/MSX1/RAD9A/IL20RA/MYBBP1A/PTTG1IP/GRINA/ABL1/STK24/SFRP2/RPS7/NF/  
'5/ABR/CDC42SE1/IL2RB/GRB2/CDC42/CALR/CDC42SE2/AXL/CLEC7A/RACK1/LBP/ARPC1A/RUBCN  
'HEB/BTG2/PIDD1/ABL1/CHEK2/SGSM3/PRKAA2/VASH1/THBS1/NOTCH1/NBN/PLK3/TBRG4/CRLF3/  
'3/PSMC4/AP2M1/RAB10/DYNC1LI1/AP2S1/PSMD10/PSMD11/PSMD1/KIF2A/HLA-B/PSMA7/PSMB3/  
'90AA1/PRKAA2/RPS15/EIF3M/STYXL1/RPL5/RPF2/BICD1/RPL6/PIH1D1/TARBP2/RBMX/ZRSR2/F  
'ACTR3/HSP90AA1/CHD1L/MPP7/SPIRE1/DCTN1/SH3GLB1/ERCC1/VEGFA/PIH1D1/MECP2/PPP2R5E  
'ICM8/PRIM2/MTBP/RFWD3/RPA2/CUL4B/E2F6/TRIM71/KHDRBS1/BTN2A2/BTG2/ACVR1/TAF10/PII  
'3/CD6/PNP/GAL/HELLS/FADD/BTK/PELI1/RASAL3/GPR183/WNT4/BTN2A2/ZNF335/HSPD1/ABL1/F  
'31/PKNOX1/RPS14/INPP5D/ZNF16/ADD1/PIK3CB/ACIN1/ASXL1/RPS6/CASP3/ADAR/SMAD5/BCR/!  
';/PSMD7/LILRB4/IKBK/PTPN6/CD27/IL12RB1/IL15/RPS3/GRB2/CD6/CDC42/IL4R/PNP/LILRB4/AP3D1/F/  
'IAPT/CYCS/LONP1/ABL1/STK24/MSRB3/TNFAIP3/PDCD10/PSAP/PRKAA2/DNM2  
';/PPP4C/INO80C/TIMELESS/EXOSC3/EID3/HSPD1/RAD51C/RAD51D/WRAP53/UBQLN4/EME2/SFR1/  
'CTEX1D2/SPA17/CCSAP/BICD1/HNRNPU/MAP1A/DYNC1I2/KIF20B/KIF22/ARL8B/AP3B1/IFT20/F  
'PS15/NOL6/MRPL18/HNRNPU/LTV1/SARNP/MAGOH/THOC2/XPO7/SLC35B1/SLC35A4/HNRNPA1/EIF  
'T1/NOP10/KRI1/RPS7/RPL7A/WDR55/GAR1/SEN3/RPS15/RPS16/RPL5/GTF3C5/NOL6/RPF2/BM1  
'T10/POLE3/CTBP1/SEH1L/EIF6/CNOT3/SUV39H1/POLR2E/PRKRA/MORF4L1/SND1/SPOUT1/SRCF  
'RPS15/DNM2/CTEX1D2/VPS35/NOL6/HNRNPU/LTV1/SARNP/MAGOH/RAB11A/THOC2/KLHL21/EIF  
'ERCC1/ADGRG3/CD79B/CD38/INHA/RNF8/LYL1/RBPJ/NOTCH2/DOCK10/MSH6/TP53BP1/ATAD5/TH  
'/PLK4/PSMD10/PSMD11/NES/PSMD1/DONSON/ODF2/CDK7/PSMA7/PSMB3/TOPBP1/APP/PSMD4/CE1  
'42/IL4R/PNP/LILRB4/AP3D1/AXL/FADD/BTK/PELI1/CLEC7A/RASAL3/GPR183/EXOSC3/BTN2A2/  
'A/STK25/RACK1/MSX1/RAD9A/IL20RA/MYBBP1A/PTTG1IP/GRINA/ABL1/STK24/SFRP2/RPS7/NF/  
'5/ABR/CDC42SE1/IL2RB/GRB2/CDC42/CALR/CDC42SE2/AXL/CLEC7A/RACK1/LBP/ARPC1A/RUBCN  
'HEB/BTG2/PIDD1/ABL1/CHEK2/SGSM3/PRKAA2/VASH1/THBS1/NOTCH1/NBN/PLK3/TBRG4/CRLF3/  
'3/PSMC4/AP2M1/RAB10/DYNC1LI1/AP2S1/PSMD10/PSMD11/PSMD1/KIF2A/HLA-B/PSMA7/PSMB3/  
'90AA1/PRKAA2/RPS15/EIF3M/STYXL1/RPL5/RPF2/BICD1/RPL6/PIH1D1/TARBP2/RBMX/ZRSR2/F  
'ACTR3/HSP90AA1/CHD1L/MPP7/SPIRE1/DCTN1/SH3GLB1/ERCC1/VEGFA/PIH1D1/MECP2/PPP2R5E  
'ICM8/PRIM2/MTBP/RFWD3/RPA2/CUL4B/E2F6/TRIM71/KHDRBS1/BTN2A2/BTG2/ACVR1/TAF10/PII  
'3/CD6/PNP/GAL/HELLS/FADD/BTK/PELI1/RASAL3/GPR183/WNT4/BTN2A2/ZNF335/HSPD1/ABL1/F  
'31/PKNOX1/RPS14/INPP5D/ZNF16/ADD1/PIK3CB/ACIN1/ASXL1/RPS6/CASP3/ADAR/SMAD5/BCR/!  
';/PSMD7/LILRB4/IKBK/PTPN6/CD27/IL12RB1/IL15/RPS3/GRB2/CD6/CDC42/IL4R/PNP/LILRB4/AP3D1/F/  
'IAPT/CYCS/LONP1/ABL1/STK24/MSRB3/TNFAIP3/PDCD10/PSAP/PRKAA2/DNM2  
';/PPP4C/INO80C/TIMELESS/EXOSC3/EID3/HSPD1/RAD51C/RAD51D/WRAP53/UBQLN4/EME2/SFR1/  
'CTEX1D2/SPA17/CCSAP/BICD1/HNRNPU/MAP1A/DYNC1I2/KIF20B/KIF22/ARL8B/AP3B1/IFT20/F  
'PS15/NOL6/MRPL18/HNRNPU/LTV1/SARNP/MAGOH/THOC2/XPO7/SLC35B1/SLC35A4/HNRNPA1/EIF  
'T1/NOP10/KRI1/RPS7/RPL7A/WDR55/GAR1/SEN3/RPS15/RPS16/RPL5/GTF3C5/NOL6/RPF2/BM1  
'T10/POLE3/CTBP1/SEH1L/EIF6/CNOT3/SUV39H1/POLR2E/PRKRA/MORF4L1/SND1/SPOUT1/SRCF  
'RPS15/DNM2/CTEX1D2/VPS35/NOL6/HNRNPU/LTV1/SARNP/MAGOH/RAB11A/THOC2/KLHL21/EIF  
'ERCC1/ADGRG3/CD79B/CD38/INHA/RNF8/LYL1/RBPJ/NOTCH2/DOCK10/MSH6/TP53BP1/ATAD5/TH  
'/PLK4/PSMD10/PSMD11/NES/PSMD1/DONSON/ODF2/CDK7/PSMA7/PSMB3/TOPBP1/APP/PSMD4/CE1  
'42/IL4R/PNP/LILRB4/AP3D1/AXL/FADD/BTK/PELI1/CLEC7A/RASAL3/GPR183/EXOSC3/BTN2A2/  
'A/STK25/RACK1/MSX1/RAD9A/IL20RA/MYBBP1A/PTTG1IP/GRINA/ABL1/STK24/SFRP2/RPS7/NF/  
'5/ABR/CDC42SE1/IL2RB/GRB2/CDC42/CALR/CDC42SE2/AXL/CLEC7A/RACK1/LBP/ARPC1A/RUBCN  
'HEB/BTG2/PIDD1/ABL1/CHEK2/SGSM3/PRKAA2/VASH1/THBS1/NOTCH1/NBN/PLK3/TBRG4/CRLF3/  
'3/PSMC4/AP2M1/RAB10/DYNC1LI1/AP2S1/PSMD10/PSMD11/PSMD1/KIF2A/HLA-B/PSMA7/PSMB3/  
'90AA1/PRKAA2/RPS15/EIF3M/STYXL1/RPL5/RPF2/BICD1/RPL6/PIH1D1/TARBP2/RBMX/ZRSR2/F  
'ACTR3/HSP90AA1/CHD1L/MPP7/SPIRE1/DCTN1/SH3GLB1/ERCC1/VEGFA/PIH1D1/MECP2/PPP2R5E  
'ICM8/PRIM2/MTBP/RFWD3/RPA2/CUL4B/E2F6/TRIM71/KHDRBS1/BTN2A2/BTG2/ACVR1/TAF10/PII  
'3/CD6/PNP/GAL/HELLS/FADD/BTK/PELI1/RASAL3/GPR183/WNT4/BTN2A2/ZNF335/HSPD1/ABL1/F  
'31/PKNOX1/RPS14/INPP5D/ZNF16/ADD1/PIK3CB/ACIN1/ASXL1/RPS6/CASP3/ADAR/SMAD5/BCR/!  
';/PSMD7/LILRB4/IKBK/PTPN6/CD27/IL12RB1/IL15/RPS3/GRB2/CD6/CDC42/IL4R/PNP/LILRB4/AP3D1/F/  
'IAPT/CYCS/LONP1/ABL1/STK24/MSRB3/TNFAIP3/PDCD10/PSAP/PRKAA2/DNM2  
';/PPP4C/INO80C/TIMELESS/EXOSC3/EID3/HSPD1/RAD51C/RAD51D/WRAP53/UBQLN4/EME2/SFR1/  
'CTEX1D2/SPA17/CCSAP/BICD1/HNRNPU/MAP1A/DYNC1I2/KIF20B/KIF22/ARL8B/AP3B1/IFT20/F  
'PS15/NOL6/MRPL18/HNRNPU/LTV1/SARNP/MAGOH/THOC2/XPO7/SLC35B1/SLC35A4/HNRNPA1/EIF  
'T1/NOP10/KRI1/RPS7/RPL7A/WDR55/GAR1/SEN3/RPS15/RPS16/RPL5/GTF3C5/NOL6/RPF2/BM1  
'T10/POLE3/CTBP1/SEH1L/EIF6/CNOT3/SUV39H1/POLR2E/PRKRA/MORF4L1/SND1/SPOUT1/SRCF  
'RPS15/DNM2/CTEX1D2/VPS35/NOL6/HNRNPU/LTV1/SARNP/MAGOH/RAB11A/THOC2/KLHL21/EIF  
'ERCC1/ADGRG3/CD79B/CD38/INHA/RNF8/LYL1/RBPJ/NOTCH2/DOCK10/MSH6/TP53BP1/ATAD5/TH  
'/PLK4/PSMD10/PSMD11/NES/PSMD1/DONSON/ODF2/CDK7/PSMA7/PSMB3/TOPBP1/APP/PSMD4/CE1  
'42/IL4R/PNP/LILRB4/AP3D1/AXL/FADD/BTK/PELI1/CLEC7A/RASAL3/GPR183/EXOSC3/BTN2A2/  
'A/STK25/RACK1/MSX1/RAD9A/IL20RA/MYBBP1A/PTTG1IP/GRINA/ABL1/STK24/SFRP2/RPS7/NF/  
'5/ABR/CDC42SE1/IL2RB/GRB2/CDC42/CALR/CDC42SE2/AXL/CLEC7A/RACK1/LBP/ARPC1A/RUBCN  
'HEB/BTG2/PIDD1/ABL1/CHEK2/SGSM3/PRKAA2/VASH1/THBS1/NOTCH1/NBN/PLK3/TBRG4/CRLF3/  
'3/PSMC4/AP2M1/RAB10/DYNC1LI1/AP2S1/PSMD10/PSMD11/PSMD1/KIF2A/HLA-B/PSMA7/PSMB3/  
'90AA1/PRKAA2/RPS15/EIF3M/STYXL1/RPL5/RPF2/BICD1/RPL6/PIH1D1/TARBP2/RBMX/ZRSR2/F  
'ACTR3/HSP90AA1/CHD1L/MPP7/SPIRE1/DCTN1/SH3GLB1/ERCC1/VEGFA/PIH1D1/MECP2/PPP2R5E  
'ICM8/PRIM2/MTBP/RFWD3/RPA2/CUL4B/E2F6/TRIM71/KHDRBS1/BTN2A2/BTG2/ACVR1/TAF10/PII  
'3/CD6/PNP/GAL/HELLS/FADD/BTK/PELI1/RASAL3/GPR183/WNT4/BTN2A2/ZNF335/HSPD1/ABL1/F  
'31/PKNOX1/RPS14/INPP5D/ZNF16/ADD1/PIK3CB/ACIN1/ASXL1/RPS6/CASP3/ADAR/SMAD5/BCR/!  
';/PSMD7/LILRB4/IKBK/PTPN6/CD27/IL12RB1/IL15/RPS3/GRB2/CD6/CDC42/IL4R/PNP/LILRB4/AP3D1/F/  
'IAPT/CYCS/LONP1/ABL1/STK24/MSRB3/TNFAIP3/PDCD10/PSAP/PRKAA2/DNM2  
';/PPP4C/INO80C/TIMELESS/EXOSC3/EID3/HSPD1/RAD51C/RAD51D/WRAP53/UBQLN4/EME2/SFR1/  
'CTEX1D2/SPA17/CCSAP/BICD1/HNRNPU/MAP1A/DYNC1I2/KIF20B/KIF22/ARL8B/AP3B1/IFT20/F  
'PS15/NOL6/MRPL18/HNRNPU/LTV1/SARNP/MAGOH/THOC2/XPO7/SLC35B1/SLC35A4/HNRNPA1/EIF  
'T1/NOP10/KRI1/RPS7/RPL7A/WDR55/GAR1/SEN3/RPS15/RPS16/RPL5/GTF3C5/NOL6/RPF2/BM1  
'T10/POLE3/CTBP1/SEH1L/EIF6/CNOT3/SUV39H1/POLR2E/PRKRA/MORF4L1/SND1/SPOUT1/SRCF  
'RPS15/DNM2/CTEX1D2/VPS35/NOL6/HNRNPU/LTV1/SARNP/MAGOH/RAB11A/THOC2/KLHL21/EIF  
'ERCC1/ADGRG3/CD79B/CD38/INHA/RNF8/LYL1/RBPJ/NOTCH2/DOCK10/MSH6/TP53BP1/ATAD5/TH  
'/PLK4/PSMD10/PSMD11/NES/PSMD1/DONSON/ODF2/CDK7/PSMA7/PSMB3/TOPBP1/APP/PSMD4/CE1  
'42/IL4R/PNP/LILRB4/AP3D1/AXL/FADD/BTK/PELI1/CLEC7A/RASAL3/GPR183/EXOSC3/BTN2A2/  
'A/STK25/RACK1/MSX1/RAD9A/IL20RA/MYBBP1A/PTTG1IP/GRINA/ABL1/STK24/SFRP2/RPS7/NF/  
'5/ABR/CDC42SE1/IL2RB/GRB2/CDC42/CALR/CDC42SE2/AXL/CLEC7A/RACK1/LBP/ARPC1A/RUBCN  
'HEB/BTG2/PIDD1/ABL1/CHEK2/SGSM3/PRKAA2/VASH1/THBS1/NOTCH1/NBN/PLK3/TBRG4/CRLF3/  
'3/PSMC4/AP2M1/RAB10/DYNC1LI1/AP2S1/PSMD10/PSMD11/PSMD1/KIF2A/HLA-B/PSMA7/PSMB3/  
'90AA1/PRKAA2/RPS15/EIF3M/STYXL1/RPL5/RPF2/BICD1/RPL6/PIH1D1/TARBP2/RBMX/ZRSR2/F  
'ACTR3/HSP90AA1/CHD1L/MPP7/SPIRE1/DCTN1/SH3GLB1/ERCC1/VEGFA/PIH1D1/MECP2/PPP2R5E  
'ICM8/PRIM2/MTBP/RFWD3/RPA2/CUL4B/E2F6/TRIM71/KHDRBS1/BTN2A2/BTG2/ACVR1/TAF10/PII  
'3/CD6/PNP/GAL/HELLS/FADD/BTK/PELI1/RASAL3/GPR183/WNT4/BTN2A2/ZNF335/HSPD1/ABL1/F  
'31/PKNOX1/RPS14/INPP5D/ZNF16/ADD1/PIK3CB/ACIN1/ASXL1/RPS6/CASP3/ADAR/SMAD5/BCR/!  
';/PSMD7/LILRB4/IKBK/PTPN6/CD27/IL12RB1/IL15/RPS3/GRB2/CD6/CDC42/IL4R/PNP/LILRB4/AP3D1/F/  
'IAPT/CYCS/LONP1/ABL1/STK24/MSRB3/TNFAIP3/PDCD10/PSAP/PRKAA2/DNM2  
';/PPP4C/INO80C/TIMELESS/EXOSC3/EID3/HSPD1/RAD51C/RAD51D/WRAP53/UBQLN4/EME2/SFR1/  
'CTEX1D2/SPA17/CCSAP/BICD1/HNRNPU/MAP1A/DYNC1I2/KIF20B/KIF22/ARL8B/AP3B1/IFT20/F  
'PS15/NOL6/MRPL18/HNRNPU/LTV1/SARNP/MAGOH/THOC2/XPO7/SLC35B1/SLC35A4/HNRNPA1/EIF  
'T1/NOP10/KRI1/RPS7/RPL7A/WDR55/GAR1/SEN3/RPS15/RPS16/RPL5/GTF3C5/NOL6/RPF2/BM1  
'T10/POLE3/CTBP1/SEH1L/EIF6/CNOT3/SUV39H1/POLR2E/PRKRA/MORF4L1/SND1/SPOUT1/SRCF  
'RPS15/DNM2/CTEX1D2/VPS35/NOL6/HNRNPU/LTV1/SARNP/MAGOH/RAB11A/THOC2/KLHL21/EIF  
'ERCC1/ADGRG3/CD79B/CD38/INHA/RNF8/LYL1/RBPJ/NOTCH2/DOCK10/MSH6/TP53BP1/ATAD5/TH  
'/PLK4/PSMD10/PSMD11/NES/PSMD1/DONSON/ODF2/CDK7/PSMA7/PSMB3/TOPBP1/APP/PSMD4/CE1  
'42/IL4R/PNP/LILRB4/AP3D1/AXL/FADD/BTK/PELI1/CLEC7A/RASAL3/GPR183/EXOSC3/BTN2A2/  
'A/STK25/RACK1/MSX1/RAD9A/IL20RA/MYBBP1A/PTTG1IP/GRINA/ABL1/STK24/SFRP2/RPS7/NF/  
'5/ABR/CDC42SE1/IL2RB/GRB2/CDC42/CALR/CDC42SE2/AXL/CLEC7A/RACK1/LBP/ARPC1A/RUBCN  
'HEB/BTG2/PIDD1/ABL1/CHEK2/SGSM3/PRKAA2/VASH1/THBS1/NOTCH1/NBN/PLK3/TBRG4/CRLF3/  
'3/PSMC4/AP2M1/RAB10/DYNC1LI1/AP2S1/PSMD10/PSMD11/PSMD1/KIF2A/HLA-B/PSMA7/PSMB3/  
'90AA1/PRKAA2/RPS15/EIF3M/STYXL1/RPL5/RPF2/BICD1/RPL6/PIH1D1/TARBP2/RBMX/ZRSR2/F  
'ACTR3/HSP90AA1/CHD1L/MPP7/SPIRE1/DCTN1/SH3GLB1/ERCC1/VEGFA/PIH1D1/MECP2/PPP2R5E  
'ICM8/PRIM2/MTBP/RFWD3/RPA2/CUL4B/E2F6/TRIM71/KHDRBS1/BTN2A2/BTG2/ACVR1/TAF10/PII  
'3/CD6/PNP/GAL/HELLS/FADD/BTK/PELI1/RASAL3/GPR183/WNT4/BTN2A2/ZNF335/HSPD1/ABL1/F  
'31/PKNOX1/RPS14/INPP5D/ZNF16/ADD1/PIK3CB/ACIN1/ASXL1/RPS6/CASP3/ADAR/SMAD5/BCR/!  
';/PSMD7/LILRB4/IKBK/PTPN6/CD27/IL12RB1/IL15/RPS3/GRB2/CD6/CDC42/IL4R/PNP/LILRB4/AP3D1/F/  
'IAPT/CYCS/LONP1/ABL1/STK24/MSRB3/TNFAIP3/PDCD10/PSAP/PRKAA2/DNM2  
';/PPP4C/INO80C/TIMELESS/EXOSC3/EID3/HSPD1/RAD51C/RAD51D/WRAP53/UBQLN4/EME2/SFR1/  
'CTEX1D2/SPA17/CCSAP/BICD1/HNRNPU/MAP1A/DYNC1I2/KIF20B/KIF22/ARL8B/AP3B1/IFT20/F  
'PS15/NOL6/MRPL18/HNRNPU/LTV1/SARNP/MAGOH/THOC2/XPO7/SLC35B1/SLC35A4/HNRNPA1/EIF  
'T1/NOP10/KRI1/RPS7/RPL7A/WDR55/GAR1/SEN3/RPS15/RPS16/RPL5/GTF3C5/NOL6/RPF2/BM1  
'T10/POLE3/CTBP1/SEH1L/EIF6/CNOT3/SUV39H1/POLR2E/PRKRA/MORF4L1/SND1/SPOUT1/SRCF  
'RPS15/DNM2/CTEX1D2/VPS35/NOL6/HNRNPU/LTV1/SARNP/MAGOH/RAB11A/THOC2/KLHL21/EIF  
'ERCC1/ADGRG3/CD79B/CD38/INHA/RNF8/LYL1/RBPJ/NOTCH2/DOCK10/MSH6/TP53BP1/ATAD5/TH  
'/PLK4/PSMD10/PSMD11/NES/PSMD1/DONSON/ODF2/CDK7/PSMA7/PSMB3/TOPBP1/APP/PSMD4/CE1  
'42/IL4R/PNP/LILRB4/AP3D1/AXL/FADD/BTK/PELI1/CLEC7A/RASAL3/GPR183/EXOSC3/BTN2A2/  
'A/STK25/RACK1/MSX1/RAD9A/IL20RA/MYBBP1A/PTTG1IP/GRINA/ABL1/STK24/SFRP2/RPS7/NF/  
'5/ABR/CDC42SE1/IL2RB/GRB2/CDC42/CALR/CDC42SE2/AXL/CLEC7A/RACK1/LBP/ARPC1A/RUBCN  
'HEB/BTG2/PIDD1/ABL1/CHEK2/SGSM3/PRKAA2/VASH1/THBS1/NOTCH1/NBN/PLK3/TBRG4/CRLF3/  
'3/PSMC4/AP2M1/RAB10/DYNC1LI1/AP2S1/PSMD10/PSMD11/PSMD1/KIF2A/HLA-B/PSMA7/PSMB3/  
'90AA1/PRKAA2/RPS15/EIF3M/STYXL1/RPL5/RPF2/BICD1/RPL6/PIH1D1/TARBP2/RBMX/ZRSR2/F  
'ACTR3/HSP90AA1/CHD1L/MPP7/SPIRE1/DCTN1/SH3GLB1/ERCC1/VEGFA/PIH1D1/MECP2/PPP2R5E  
'ICM8/PRIM2/MTBP/RFWD3/RPA2/CUL4B/E2F6/TRIM71/KHDRBS1/BTN2A2/BTG2/ACVR1/TAF10/PII  
'3/CD6/PNP/GAL/HELLS/FADD/BTK/PELI1/RASAL3/GPR183/WNT4/BTN2A2/ZNF335/HSPD1/ABL1/F  
'31/PKNOX1/RPS14/INPP5D/ZNF16/ADD1/PIK3CB/ACIN1/ASXL1/RPS6/CASP3/ADAR/SMAD5/BCR/!  
';/PSMD7/LILRB4/IKBK/PTPN6/CD27/IL12RB1/IL15/RPS3/GRB2/CD6/CDC42/IL4R/PNP/LILRB4/AP3D1/F/  
'IAPT/CYCS/LONP1/ABL1/STK24/MSRB3/TNFAIP3/PDCD10/PSAP/PRKAA2/DNM2  
';/PPP4C/INO80C/TIMELESS/EXOSC3/EID3/HSPD1/RAD51C/RAD51D/WRAP53/UBQLN4/EME2/SFR1/  
'CTEX1D2/SPA17/CCSAP/BICD1/HNRNPU/MAP1A/DYNC1I2/KIF20B/KIF22/ARL8B/AP3B1/IFT20/F  
'PS15/NOL6/MRPL18/HNRNPU/LTV1/SARNP/MAGOH/THOC2/XPO7/SLC35B1/SLC35A4/HNRNPA1/EIF  
'T1/NOP10/KRI1/RPS7/RPL7A/WDR55/GAR1/SEN3/RPS15/RPS16/RPL5/GTF3C5/NOL6/RPF2/BM1  
'T10/POLE3/CTBP1/SEH1L/EIF6/CNOT3/SUV39H1/POLR2E/PRKRA/MORF4L1/SND1/SPOUT1/SRCF  
'RPS15/DNM2/CTEX1D2/VPS35/NOL6/HNRNPU/LTV1/SARNP/MAGOH/RAB11A/THOC2/KLHL21/EIF  
'ERCC1/ADGRG3/CD79B/CD38/INHA/RNF8/LYL1/RBPJ/NOTCH2/DOCK10/MSH6/TP53BP1/ATAD5/TH  
'/PLK4/PSMD10/PSMD11/NES/PSMD1/DONSON/ODF2/CDK7/PSMA7/PSMB3/TOPBP1/APP/PSMD4/CE1  
'42/IL4R/PNP/LILRB4/AP3D1/AXL/FADD/BTK/PELI1/CLEC7A/RASAL3/GPR183/EXOSC3/BTN2A2/  
'A/STK25/RACK1/MSX1/RAD9A/IL20RA/MYBBP1A/PTTG1IP/GRINA/ABL1/STK24/SFRP2/RPS7/NF/  
'5/ABR/CDC42SE1/IL2RB/GRB2/CDC42/CALR/CDC42SE2/AXL/CLEC7A/RACK1/LBP/ARPC1A/RUBCN  
'HEB/BTG2/PIDD1/ABL1/CHEK2/SGSM3/PRKAA2/VASH1/THBS1/NOTCH1/NBN/PLK3/TBRG4/CRLF3/  
'3/PSMC4/AP2M1/RAB10/DYNC1LI1/AP2S1/PSMD10/PSMD11/PSMD1/KIF2A/HLA-B/PSMA7/PSMB3/  
'90AA1/PRKAA2/RPS15/EIF3M/STYXL1/RPL5/RPF2/BICD1/RPL6/PIH1D1/TARBP2/RBMX/ZRSR2/F  
'ACTR3/HSP90AA1/CHD1L/MPP7/SPIRE1/DCTN1/SH3GLB1/ERCC1/VEGFA/PIH1D1/MECP2/PPP2R5E  
'ICM8/PRIM2/MTBP/RFWD3/RPA2/CUL4B/E2F6/TRIM71/KHDRBS1/BTN2A2/BTG2/ACVR1/TAF10/PII  
'3/CD6/PNP/GAL/HELLS/FADD/BTK/PELI1/RASAL3/GPR183/WNT4/BTN2A2/ZNF335/HSPD1/ABL1/F  
'31/PKNOX1/RPS14/INPP5D/ZNF16/ADD1/PIK3CB/ACIN1/ASXL1/RPS6/CASP3/ADAR/SMAD5/BCR/!  
';/PSMD7/LILRB4/IKBK/PTPN6/CD27/IL12RB1/IL15/RPS3/GRB2/CD6/CDC42/IL4R/PNP/LILRB4/AP3D1/F/  
'IAPT/CYCS/LONP1/ABL1/STK24/MSRB3/TNFAIP3/PDCD10/

'PSMD1/DONSON/ODF2/CDK7/PSMA7/PSMB3/TOPBP1/APP/PSMD4/CETN2/PSMD3/RBX1/PSMD7/RAD2



5/BICD1/HNRNPU/MAP1A/MARK4/EML2/TRIM37/MECP2/CENPJ/CDK5R1/RBM14/RHOA/CLTC  
5/FCGR2B/TNFAIP3/VCAM1/TWSG1  
'PSMD4/PSMD3/CTSD/PSMD7/IKBKG/AP1B1/SEC13/PSMD8/HLA-DOA/FCGR2B/PSMA1/VAMP8/PSMB  
S/VAV3/TSC1/SHTN1/TTL

'PSMD4/PSMD3/CTSD/PSMD7/AP3D1/IKBKG/AP1B1/SEC13/PSMD8/HLA-DOA/FCGR2B/PSMA1/VAMP  
'NEDD1/CENPJ/CC2D2A/VPS11/YWHAG/STXBP1/B9D1/SNPH/PSEN2/VPS33A/NPHP4/SNX3/CAV2/AC  
:/SPIRE2/NCKAP1/PPP1R9A  
3A/CCDC88A/LRPPRC/KIF5B/DYNC2LI1/ARL3/TRIM46/TUB/TTC21A/ARL8A/CNIH2/BBS12/TRAK2/  
3/HAX1/PREX1/ARFGEF1/ADD1/MYO1C/SPIRE2/NCKAP1/PPP1R9A  
'3K1/ELMO2/PSMC5/CD247/CD3G/PTPRC/CLEC4E/PIK3CB/MYO1C/PSMB1/NCKAP1/PLCG1/MAP3K7/

110/MEX3D/RBM24/KHSRP/EXOSC2/LARP1/YTHDF2/METTL3/HNRNPA0/PSMB1/TNFRSF1B/MOV10/PS  
'THDF2/METTL3/VRK2/PPARG/TRIM32/ADAR/AGPAT1/MADD  
'RKAG1/MAPKAPK5/RPA1/BRPF1/TAF13/TBP/ATR/ATAD5/TAF3/CSNK2A2/BDKRB2/PIN1/RPL11/PF  
D7/BRD4/MAPK15/TERF1/HNRNPA2B1/AKAP8/WBP2/XRCC5/TP53/PARN/SLX4/ARRB1/TPR/RNF40/  
31/THBS1/ADAM17  
'1/DNAJC4/BHLHA15/HSP90B1/HSPA13/DAB2IP/FKBP14/FBXO6/STUB1/FAF2/CHAC1/ADD1/SSR1  
1/PREX1/ARFGEF1/ADD1/MYO1C/SPIRE2/NCKAP1/PPP1R9A  
'RPL19/PSMC3/POLR2I/RPS11/POLR2J/RPL13A/POLR2D/RPL37A/RPLP1/DHX9/IFITM3/RPL32/RP  
B/PJ/CCAR2/EGF/CAV1/ZBED2/BMP2/PSMB1/PIN1/CSNK1G1/PSMB6/PSMA3/MBD2/LYPD6/PSMB7/5  
'VPS4A/CTDP1/SRPK2/ZCCHC3/DBB1/P4HB/CD180/VAPA/TBC1D20/ADAR/PRF1/IGF2R/POLR2B/CI  
CA5/GTF2H1/PSMC5/POLE3/RPA1/TBP/IPO4/GRWD1/ERCC3/TAF1B  
2/ATR/PARP10  
'PS11/YWHAG/STXBP1/B9D1/SNPH/PSEN2/VPS33A/NPHP4/CAV2/ACTR1A/OFD1/TMEM67/CEP72/R/

3ECN1/TFDP1/PRKRA/PDIA3/CAV1/DAB2IP/PTPRC/BIK/STK4/RPL11/PLA2G6/NOX1/PARK7/NMT1/  
P/HMGA2/MORC2/HDAC5/PABPC1L  
./SMG7/HNRNPD/DCP2/HNRNPC/MYC/HUS1/MAPK15/TERF1/HNRNPA2B1  
3/RTKN2/PSMA3/AGO1/RELA/PSMB7/SKP1/NOD1/NOD2/CARD14/RASSF2  
'RBM24/KHSRP/EXOSC2/LARP1/YTHDF2/METTL3/HNRNPA0/PSMB1/MOV10/PSMB6/HNRNPD/PSMA3/I

LE2/ATAD5/THOC1/MMS22L

'SF15/PTPN2/ADAM17/CASP8/TXNDC17/PIAS4/TNFRSF25/TNFRSF9/PSMC3/ACTN4/TNFRSF14/PSM  
HISA5/TRIM62/CD4/BRD4/RELA/TFG/NOD1/PRKCB/JMJD8/MUL1/SLC20A1/NOD2/PLEKHG5/IKBKE  
HOC7/AAAS/THOC3/HNRNPA2B1/SUPT6H/U2AF1L4/SRSF3/NUP214/BICD2/IWS1/DDX19A/TPR/SRS

'HNRNPD/DCP2/HNRNPC/MYC/HUS1/MAPK15/TERF1/HNRNPA2B1

RG/TRIM32/ADAR/AGPAT1/MADD

MB6/PSMA3/PDE6G/AGO1/CELSR3/PSMB7/FZD9/GNG2/DVL1/WNT5A/PPP3CB/PSMD12/PARD6A/SMI

'1/ATAD5/BDKRB2/P4HB/TRIM32/RPL11/RTKN2/NOX1/PARK7/ING2/FIGNL1/HTRA2  
:19

RIH2/RNF186/UBL5/BAP1

'TSC1/IWS1/DDX19A/TPR/SRSF7/MCM3AP/NUP50

'T6H/U2AF1L4/SRSF3/NUP214/TSC1/IWS1/DDX19A/TPR/SRSF7/MCM3AP/NUP50

.9/RPS6/VAPA/RPL24/RPL11/RPL10/RPS24/RPS3A/RPL14/SRP19/RPL10A/RPL12/SRP14/RPS18/  
/S1/DDX19A/TPR/SRSF7/MCM3AP/NUP50

:4/RPL11/RPL10/RPS24/DCP2/PYM1/RPS3A/RPL14/RPL10A/EIF4G1/RPL12/RPS18/RPS28/RPS17

)/RPL10A/RPL12/SRP14/RPS18/RPS28/RPS17/RPL22/RPS15A/CHMP4A/SRP72/RPL31

)A/RPL12/SRP14/RPS18/RPS28/RPS17/RPL22/RPS15A/CHMP4A/SRP72/RPL31

3/RPS17/RPL22/RPS15A/SRP72/RPL31

.22/RPS15A/SRP72/RPL31





IGAP1/RTKN/SHC1/RANGRF/CDK2/ARHGDIB/KIF14/KPNB1/RAB20/LYN/RAC1/KCTD10/RAP2A/GNB1  
ITF2/ATXN7L3/CBX8/PCGF2/PPP5C/TBL1XR1/DR1/PRDM4/VRK1/CXXC1/CUL4B/DPF2/NTMT1/SUV3  
'SIPA1L2/MKKS/ARHGDIB/TBC1D30/ITGB1BP1/STMN3/CCL4/PLXND1/TBC1D13/RASA3/DVL2/ARHG  
ARD10/EFNA5/DGKZ/RGS14/MAPK3/MAP2K2/CENPE/PPP2R1A/PAK1/PEA15/NPM1/SPRED1/RBL1/F  
L2/IL34/RGS14/HIF1A/FZD1/TRIM11/PAK1/CRABP2/ADGRG1/ANKRD27/NRCAM/THY1/XRCC2/RTN4  
.D/KDM1A/LYN/GPRC5B/IL1B/ADRA2C/RNF157/PLXND1/PPP1CC/NDRG4/NAP1L2/TUBB2B/DVL2/NF  
'5/CARD9/PSMB9/TFRC/HLA-DPA1/HLA-DMB/VSIG4/CTSK/WIPF3/TRAF2/RBCK1/PSMD14/HMGB2/1  
JAB1/TGFA/TNFRSF11A/RELN/RFC2/MARK2/NCAPG2/FGFR1/CCT4/MT3/PNKP/DVL3/NCKAP1L/MLS1  
IVD/SLC35C1/ST3GAL5/POMGNT1/MGAT4A/NAGPA/CSPG5/TNIP1/CHST12/CSPG4/MFNG/FUT1/LFNC  
'PDCD10/CHEK2/CLSPN/MAPKAPK3/HSP90AA1/PRKAA2/CSNK2A1/VEGFA/PAK2/MASTL/LMTK2/MAP3  
'1/PSMD13/IFI16/PSMC4/MUC5B/COCH/UBE2D1/PSMD10/PSMD11/PSMD1/PSMA7/TRAF3/PSMB3/AF  
'ZNF593/ACTB/CDK5/TXN/DNAJB2/PLXND1/IFI16/PARP1/NES/EIF4A3/LOX/RUVBL2/TFAP4/ARRE  
JGCG/GJB3  
IB3/ARRB2/MUC20/TLR5/PSMD4/XRCC6/GPATCH3/PSMD3/PSMD7/IKBKG/FADD/BTK/PELI1/CLEC7E  
'EXOSC5/TRAF3/APOBEC3D/GPATCH3/IKBKG/FADD/TRIM25/POLR3D/POLR3H/POLR3C/TNFAIP3/RN  
3IM1/BCL2L1/RILPL1/RAB11A/ZDHHC23/TSPAN14/GOLPH3L/CACNB3/PACSIN1/GORASP2/IFT20/C  
I3/KPNA6/NELFA/POLR2E/SNX3/CCL8/CAV2/SUPT4H1/HMGA2/PARP10/MORC2/NELFCD/GTF2F1/ZC  
113/STXBP1/ANP32B/DHX9/DMAP1/ADORA2B/ARF1/CIB1/CSNK2A2/HUWE1/TM9SF4/C2CD5/CNR1/M  
JBA52/CACNB3/PSMC3/TWIST1/PSMC5/TIGAR/RBPJ/VASN/SUV39H1/PDK3  
'PLK3/VEGFA/BNIP3L/EGLN2/UBA52/CACNB3/PSMC3/TWIST1/DNMT3B/PSMC5/TIGAR/RBPJ/VASN/  
'SLC8B1/PTPN2/THBS1/ADAM17/NOTCH1

IEURL1/TCHP/DMTN/DYNC2LI1/CEP97/FAM98A/MAPK15/DOCK11/ATG3/EP8L2/CARMIL2/PLXNB3/

3/GPRC5B/RAC1/CBFB/PSMB4/VANGL1/PSMB8/PSMB10/GNB1/PSMA5/PSMD13/PSMC4/GSK3A/AP2M1  
IC4/GSK3A/PML/ANAPC11/VPS28/UBE2D1/USP14/PSMD10/PSMD11/PSMD1/MVB12A/PTPN23/PSMA7  
;NK1D/ANAPC7/CDK2/KIF14/SPSB1/SNF8/AXIN1/PMAIP1/ADRM1/CCDC22/MYLIP/PSMB4/GBA/CP/  
45B/MAP1LC3B/PARP1/PSMD10/GPX1/YWHAQ/YWHAB/SDHAF2/BAG3/ARRB2/KAT2A/CHCHD3/INF2/  
./CDK5/PDGFA/CD47/CTTN/MYADM/WAS/VIL1/CIT/PFN1/WASF1/NEB/TACSTD2/CAPZB/GRB2/FHOI  
DAM8/CCL2/CXCL13/HSPH1/CD209/LYN/ITGB1BP1/CCL28/CARD11/RAC1/CBFB/ITGA2/IL1B/IL2  
./PRKAA2/CSNK2A1/VEGFA/PAK2/MASTL/LMTK2/MAP3K10/DGKQ/CDK5R1/PPM1F/NEK6/ATP2B4/M/  
'PSMD7/IKBKG/FADD/BTK/PELI1/CLEC7A/TNIP1/LBP/HSPD1/PSMD8/PSMA1/TNFAIP3/MAPKAPK3/  
2B/TOX/BAD/PTPN2/CASP8/TMEM64/NKAP/RHOA/INHA/AP3B1/RUNX3/ZMIZ1/KITLG/CCL19/NOTC  
I98/NKAP/SRF/RHOA/AP3B1/DOCK2/RUNX3/ZMIZ1/CCL19/PIK3R6/ATP7A/PKNOX1/PREX1/ZNF685  
IRPL27/MRPL28/GAK/MRPL51/MRPL11/MTPN/SPTAN1/MRPL15/C12orf65/MRPL4/CAMSAP1/CIB1/M  
IS/CD80/RASGRP1/LILRB2/NLRP3/IL12A/ZBTB7B/ROR2/SOCS5/STAT3/SCIN/MYB/ZAP70/HSPA1A/  
IAD3/ADGRA2/PSMD12/SMURF2/WNT3A/ROR2/GID8/DACT1/PSME2/JUP/PSMD6/ILK/PSMC2/PSMA6/



TPBP2/RPL17/NPEPPS/RPLP2/EIF3D/MRPS23/CNOT9/RPSA/DAPK3/ATF4/RPL10L/ITGA2/RPS5/F  
31/AXIN1/U2AF2/KDM1A/BIRC7/MED8/CCDC22/CBFB/MYLIP/PSMB4/FBXO32/KCTD10/CDK5/WFS1/  
IC4/GSK3A/PML/ANAPC11/VPS28/UBE2D1/USP14/PSMD10/PSMD11/PSMD1/MVB12A/PTPN23/PSMA7  
MYLIP/PSMB4/GBA/KCTD10/CTSS/WFS1/UBE2L3/PSMB8/RNF187/PSMB10/PSMA5/DNAJB2/TAF9/F  
3/GPRC5B/RAC1/CBFB/PSMB4/VANGL1/PSMB8/PSMB10/GNB1/PSMA5/PSMD13/PSMC4/GSK3A/AP2M1  
ABCC5/B4GALT5/FOXK1/PDP1/TMEM165/HIF1A/GALNT10/NUPR1/ACOT7/B3GNT5/GBGT1/CHST1/C  
3P3/TNFRSF18/TNFAIP8L3/TRAFF2/RBCK1/AREG/TIMP2/HMOX1/RHOC/CCL5/BAX/CD86/MAPKAPK2/  
A/GALNT6/FUT2/FUT6/AGO2/MUC20/TMEM258/CHPF/MVD/SLC35C1/ST3GAL5/POMGNT1/MGAT4A/T  
8/TANGO2/AGFG1/A4GALT/MVB12A/TMEM43/STX18/NUP155/CDC42/VPS18/CHMP1A/PLEKHJ1/CTI  
ILF3/MVB12A/ISG20/NUP155/CDC42/VPS18/CHMP1A/GRK2/APOBEC3D/CCR5/NUP107/AXL/CLEC  
PNP/CD8A/LILRB4/AP3D1/AXL/FADD/BTK/GPR183/WNT4/BTN2A2/MFNG/LFNG/ABL1/SART1/HLA-  
ILBP2/NLRC5/PLSCR1/CD209/LYN/CARD11/GPRC5B/MUC3A/ITGA2/PLA2G7/PSMB4/IL1B/CTSS/CI  
KAP5/HSPB11/IQCB1/TMEM216/ACTR3/CEP19/TBC1D7/CEP41/IFT172/HSP90AA1/DNM2/TCTEX1I  
1/BTBD10/TFAP2A/MAPT/CCL3/BTG2/ABL1/ZNF746/FCGR2B/NFATC4/BAD/VPS35/CASP8/CAPN2/  
LS1/TESK1/ITGB1BP1/ARPC5L/RAC1/CDK5/PDGFA/CD47/CTTN/MYADM/WAS/VIL1/CIT/PFN1/WAS  
KAP5/HSPB11/IQCB1/TMEM216/ACTR3/CEP19/TBC1D7/CEP41/IFT172/HSP90AA1/DNM2/TCTEX1I

AC10/NOTCH1/TMEM98/HEXB/TLR2/LGI4/PHGDH/CDK5R1/METRNL/PARD3

ID11/LTBR/PSMD1/TNFSF12/PSMA7/RPS3/TRAFF3/PSMB3/KAT2A/XCL2/PSMD4/PSMD3/CARD16/PSM  
IM25/PIDD1/ABL1/TNFAIP3/TRADD/BCL10/CASP8/RPS27A/MAVS/OPTN/TLR2/UBA52/GOLT1B/RI

DAC2/GNAI3/TMBIM1/TXNDC12/IVNS1ABP/BCL2L1/PIH1D1/MEIS3

IC3F/FAM111A/TRIM15  
'PTCD1/PNPT1/ERI1/GRSF1/PARN/TRMT10C/RNF40/SRSF7/PAPOLA/LEO1/TUT1/AHCYL1/SRSF4/F  
;OCS5/MYB/PRDX2/ZAP70/MALT1/HLA-G/GATA3/NFATC2

3A/PML/ANAPC11/VPS28/UBE2D1/USP14/PSMD10/PSMD11/PSMD1/MVB12A/PTPN23/PSMA7/UBE2F  
L1/SYT8/PYG02/MAST2/SLC4A2/PPP2R1A/PHC2/TSPAN8/TTL1/CCT2/EIF2S2/DYNLL1/DPCD/UF  
P2/FANCG/ZP3/SH3PXD2B/RUVBL1/MAPK3/PYG02/MAST2/SLC4A2/PPP2R1A/PHC2/TSPAN8/PCNA/  
P2/FANCG/ZP3/SH3PXD2B/RUVBL1/MAPK3/PYG02/MAST2/SLC4A2/PPP2R1A/PHC2/TSPAN8/PCNA/  
'FGR/CHMP3/PPP1CC/GSK3A/ABCA2/NDRG4/CPSF6/PTPN23/XPO5/RIMS3/BARD1/STX18/BAG3/IL4

75/RGS3/IGF1R/STK38/CSPG4/TRAF7/CXCL17/SFRP2/PDCD10/CSK/MAPKAPK3/DBNL/ERP29/THF  
./PSMD4/TRPM4/PSMD3/RBX1/PSMD7/TBL1XR1/CSNK1G2/WNT4/MED12/JRK/PSMD8/RARG/EMD/VCF

DAM8/YWHAH/GIPR/MCU/FRMD8/HCLS1/BBC3/PMAIP1/CCT7/ITGB1BP1/RAC1/IL1B/CDK5/UBE2L3  
3/NFATC4/BAD/VPS35/CASP8/CAPN2/GABRB3/BCL2L1/EGLN2/RILPL1/HLA-F/ZPR1/RAB29/MECP2  
'CSNK1G2/JRK/PSMD8/EMD/VCP/PSMA1/SFRP2/PSMB5/PSMA4/PSMD9/VPS35/NOTCH1/SFRP4/TMEM  
'S/OPTN/GOLT1B/RHOA/NEK6/CXXC5/UBE2N/CCL19/DAB2IP/TMEM106A/LITAF/LPAR1/MAP3K7/TF

'ATG7/SNX3/SERPINB9/CCL8/CAV2/CAV1/THOC1/VPS4A/NECTIN2/PABPN1/IFITM2/DDB1/P4HB/1  
5R1/PPM1F/DSTN/RHOA  
'RASSF5/DAXX/GLMN/SART3/PRMT3/UBE2N/PEF1/CAV1/PARP10/STUB1/RAB1A/HUWE1/HDAC8/SKI  
.1/TCHP/DMTN/DYNC2LI1/CEP97/FAM98A/MAPK15/DOCK11/ATG3/EP8L2/CARMIL2/PLXNB3/IFT1  
'ACE/PPP2CA/USP33/MAU2/EIF3C/PDX1/TICAM1/MEN1/WNT5A/ARRB1

IP8/ARRB2/SEMA4D/VPS25/APP/ADRA2A/AXL/BTK/DSTYK/CBL/ABI2/RACK1/IGF1R/CSPG4/NF2/f  
IP8/ARRB2/TPST1/SEMA4D/VPS25/APP/ADRA2A/AXL/BTK/DSTYK/CBL/ABI2/RACK1/IGF1R/CSPG4  
'CXCL16/PSMD10/PSMD11/LTBR/PSMD1/TNFSF12/PSMA7/RPS3/TRAF3/PSMB3/KAT2A/XCL2/PSMD4

TL2A/THADA/PPA1/DUS1L/THUMP2/PTCD1/GTF3C3/DDX1/METTL2B/AARS2/METTL6/GRSF1/RPP3

IFAIPL3/TRAF2/AREG/TRIM6/TIMP2/CCL5/MAPKAPK2/CXCR4/CCL26/ITGA5/MIF/CD300A/IQGAP  
;IPA1L3/SYDE1/RUNDC1/LLGL1/ARHGAP18/RANBP1/SEMA4D/XCL2/AGAP1/CDC42EP2/MYO9B/OCRI  
)/MORF4L2/MECP2/TARBP2/BAZ2A/POLR2I/POLR2J/PPHLN1/GLMN/POLR2D/DNMT3B/DHX9/SMARCB1  
LNT7/ALG1/LARGE2/GXYLT2/MUC6/B4GALT4/MUC15/GFPT1/TMEM115/POMGNT2/SLC35C2/FUT11/  
LNT7/ALG1/LARGE2/GXYLT2/MUC6/B4GALT4/MUC15/GFPT1/TMEM115/POMGNT2/SLC35C2/FUT11/  
AB1A/HUWE1/HDAC8/SKP2/PIN1

MD19/TSC1/TNFSF13/LILRB1/CD80/TP53/FGL2/NLRP3/CD40/TNFSF18/ZBTB7B/SOCS5/STAT3



IS14/HIF1A/MAPK3/EFNB1/RHBDF1/CD3E/TCIRG1/ATP6AP1/PAK1/CD63/IGFBP6/BAIAP2L1/FGF  
BCAP31/FBXO5/JAG2/RSPH1/SCMH1/MKKS/ZFP41/DEFB1/OAZ3/FANCA/TESK1/RPL10L/ADGRG2/I  
3/BEX4/PPP1R35/CEP85/DDIT4/ZC3H12A/SVBP/SLC9A3R1/PNKP/PPME1/OTUB1/DUSP2/NCKAP1L/  
IC/PSMD10/PSMD11/PSMD1/PSMA7/RUVBL2/PSMB3/SDHAF2/APCDD1/CTDNEP1/APP/PSMD4/TRPM4/  
.C/UBQLN4/VAMP8/WIP1/PRKAA2/HDAC10/CSNK2A1/VPS35/SH3GLB1/TOMM22/OPTN/GNAI3/BNIF

'2R5B/ENPP2/TNFRSF14/HBEGF/SH3BP5L/KITLG/EREG/CRLF1/OSM/HAX1/EGF/CAV1/TMEM102

'1/CAV1/DAB2IP/GTF2F1/HDAC5/DZIP1/PKD1/STUB1/BMP2/ADNP/ADD1/PIN1/TFIP11/STK4/BTF

.7/GOSR2/BET1L/RAB9A/RAB13/ARL1/AP5B1/VPS4A/SNX5/VPS16/STAM/VPS26A/MVB12B/TRIM27  
I21/HLA-F/CDC37/NMI/RPL13A/STXBP1/NR1H2/IFITM3/STXBP4/CYP27B1/CCL19/XCL1/CCL3L3/  
ZF1/GOSR2/TPP1/DNAJC4/SDF2L1/BHLHA15/HSP90B1/HSPA13/DAB2IP/FKBP14/FBXO6/STUB1/F  
CR2/PPP2R3C/CD80/SOX13/RASGRP1/FGL2/LILRB2/NLRP3/RNF41/IL12A/ZBTB7B/PRDM1/SOCS5  
.01/HLA-G/GATA3

'TRIM6/TIMP2/CCL5/MAPKAPK2/CXCR4/CCL26/ITGA5/MIF/CD300A/IQGAP1/CARD10/EFNA5/SH2I  
./SLC11A1/WNT7B/ITGB1BP1/BIRC7/GPRC5B/IL1B/CDK5/PDGFA/TXN/MLKL/ADRA2C/LCP2/MAPK1

'A/USP21/CFTR/UIMC1/USP27X/COPS5/TRIM21/UBA52/PSMC3/USP11/RHOA/ACTR5/SART3/GPS1/  
HD1/PLA2G6/PARK7/USP36/NMT1/PAM16/HTRA2/ARIH2/FZD9/UBL5/LIG3/MUL1/BAP1  
IC2LI1/CEP97/MAPK15/CNOT2/ATG3/CDK5RAP2/PTPRS/KIF9/SPICE1/SMC1A/IFT140/TSG101/CN



DI1/NUMBL/FGFR1/DYNLT1/DVL3/VLDLR/CPNE1/HEYL/HDAC2/CSNK1D/KDM1A/LYN/GPRC5B/RAC1  
'/RELN/S100B/CDH11/ZSWIM5/MARK2/GDI1/EPHB3/NUMBL/COR01B/MT3/DYNLT1/DVL3/FLOT1/NC  
L/CPNE1/HEYL/HDAC2/RAP1GAP2/CSNK1D/YWHAH/CAMSAP2/KDM1A/JAG1/LYN/GPRC5B/FKBP4/MYI  
.N/S100B/CDH11/ZSWIM5/MARK2/GDI1/EPHB3/NUMBL/COR01B/MT3/DYNLT1/DVL3/FLOT1/NCKAP1  
'MAPKAPK2/VAV1/COLEC12/PHPT1/MIF/CD300A/ZP3/HLA-DPB1/ARPC4/UNC93B1/CFD/PRKDC/MAI  
'4B/NAT10/MPV17L2/EIF3K/THBS1/PUS7/RPL5/JMJD4/SARNP/RPS4X/C8orf88/MAGOH/RCC1L/N/  
.R/PSME3/BID/MT3/BCAP31/PRR7/COL6A3/LAMP3/RARRES1/BBC3/NLE1/PMAIP1/LYN/BIRC7/ADF  
.A1/PMAIP1/RNASE2/IL1B/IL2RA/APOBEC3G/JCHAIN/RNF26/FGR/PQBP1/IFI16/MAP3K14/PML/F  
'PSMD10/CDKN2C/SEMA4B/CDC42/SERTAD3/SEMA4D/SYT1/GAL/SYT3/SEMA4F/SEMA5B/NME6/RAC1  
  
'USP27X/COPS5/TRIM21/UBA52/PSMC3/USP11/RHOA/ACTR5/SART3/JOSD1/PSMC5/USP39/BECN1/  
'OFUT2/FUT8/GALNT7/ALG1/LARGE2/GXYLT2/MUC6/B4GALT4/MUC15/GFPT1/TMEM115/POMGNT2/

'RPM2/SCRIB/DNAJC6/RAB34/RHOQ/TFRC/MRC2/WIPF3/CARMIL1/WASF2/RABEP2/SLC12A2/MAPK/  
'DAPK3/YWHAH/ITGB1BP1/RAC1/RAP2A/CDK5/S100A13/CTTN/RNF157/FGR/MYADM/PLXND1/VIL1/  
'LDLR/SHC1/KIF14/AXIN1/SLC11A1/LYN/WNT7B/ITGB1BP1/BIRC7/GPRC5B/IL1B/CDK5/PDGFA/1  
)/KRT10/IFT172/PSAP/ACVR1B/NOTCH1/UGCG/SFRP4/SLC4A7/MCOLN3/GLI1/TRPC4AP/ALOX15B/

3ICD2/RAB6A/NEFH/RASGRP1/FEZ1/NEFL  
3ICD2/RAB6A/NEFH/RASGRP1/FEZ1/NEFL

ITRF1L/MRPS35/MRPS33/MRPS10/ABCE1/MRPL45/MRPL41/MRPL49/MRRF/MRPS6/OXA1L/MRPS28/M

'MFGE8/CD300A/CLTA/ARPC4/JMJD6/MAPK3/SYT8/P2RY6/SERPINE1/MICALL1/PAK1/CD63/STX1/  
'CYP26B1/AGFG1/OSBP2/SBF1/ODF2/MYCBP/GOLGA3/MCM8/VCX/CALR/TDRKH/HSF2/MYBL1/CETN2/  
ACK1/VIM/TRIM71/DPH7/ZNF598/PLEKHN1/EIF2B5/RPL38/KHDRBS1/ABCG1/PIWIL4/BTG2/LARF/  
FTR/COPS5/HSPA5/TXNDC12/BCL2L1/CANX/EDEM2/PPP2R5B/GORASP2/GFPT1/TLN1/ANKZF1/GOS/  
IF216/CD33/PTGER4/TWSG1/TUSC2/THBS1/SRGN/MAVS/IL20RB/CD2AP/HLA-F/TWIST1/NMI/INH/

)/GIPC1/DOK2/ATP6V0B/IGFBP3/AREG/ATP6V0D2/JAK3/WASF2/MAPKAPK2/VAV1/NDN/SOGA1/ITC/  
.00B/CDH11/ZSWIM5/MARK2/GDI1/EPHB3/NUMBL/CORO1B/MT3/DYNLT1/DVL3/FLOT1/NCKAP1L/SF

./OSBP2/SBF1/ODF2/MYCBP/GOLGA3/VCX/CALR/TDRKH/HSF2/MYBL1/CETN2/TMEM119/TESMIN/AS  
'COL6A3/LAMP3/RARRES1/BBC3/NLE1/PMAIP1/LYN/BIRC7/ADRM1/LAMTOR5/SPOCK2/PSMB8/SPOC

'/TRIM46/SEMA6B/SEMA4C/MAP4K4/PTPRS/TRAK2/PLXNB3/TSC1  
./NR1H2/STXBP4/CCL19/XCL1/CCL3L3/CCL8/TRIM68

'EFNB1/MAP1S/PAK1/CRABP2/LAMA5/ANKRD27/NRCAM/THY1/CORO1C/PALLD/HSP90AB1/EPHB6/IS  
!:/NUP107/PCGF2/TRPM4/DR1/CXXC1/DPF2/GNL3/SUV39H2/ZNF335/TAF12/DOHH/TAF10/DOT1L/E

.9/OSM/TMEM106A/IL17RB/PANX2/CLEC4E/RAB1A/CRLF2/TNFRSF1B/TLR8/FFAR2/TRIM27/SYT11  
?7/ATG7/ZC3HAV1/PTPRC/ZCCHC3/CXCL10/IFITM2/SKP2/TLR8/MX1/ABCF3/ADAR/PRF1/POLR3F/  
;BF1/BCL2L1/TIMM10/AIP/NDUFA13/STOML2/SLC25A12/VPS11/YWHAG/ATG13/PSEN2/MTX2/TFDF  
'ZFAT/KMT2A/PSME2/MYB/PDGFRB/PDGFRB/PSMD6/GATA3/PSMC2/PSMA6/NUDT21/YAP1/TP73/RBM

1/HMGB2/TRIM6/BDKRB1/CCL5/CD86/MAPKAPK2/CXCR4/SLFN13/MIF/UNC93B1/BPIFB2/NFKB2/1  
1/EPHB3/NUMBL/MT3/DYNLT1/DVL3/FLOT1/NCKAP1L/SH3KBP1/VLDLR/LYPLA2/CPNE1/SHC1/PIF  
1/HMGB2/TRIM6/BDKRB1/CCL5/CD86/MAPKAPK2/CXCR4/SLFN13/MIF/UNC93B1/BPIFB2/NFKB2/1  
IAIP1/CCT7/RPS5/TSPAN10/UBE2L3/RPS21/TCP1/RPL7/RPL28/CACNG4/NUP85/GSK3A/RAB10/PM

'SPOCK1/MYADM/PLEKHA2/ADAMTS9/CCDC80/SIGLEC1/PARVG/TACSTD2/LYPD3/AKIP1/CDC42/LAM

SWAP70/MAPK7/PELI1/ANGPT2/ARHGDIA/SEMA3E/NF2/BTN2A2/ABL1/TBCD/FCGR2B/AKNA/SIPA1/

5/CAPNS1/CDK5/LAMTOR1/CTTN/CHMP3/IFI16/GSK3A/WDR45B/OSBPL7/DRAM2/MAP1LC3B/VPS28  
DIT3/APOBEC3C/CHIT1/HMGB2/TRIM6/BDKRB1/CCL5/CD86/MAPKAPK2/CXCR4/SLFN13/MIF/UNC5  
P2/EEF1D/ACLY/BCL3/GTPBP2/SCD5/RPL17/RPLP2/EIF3D/MRPS23/CNOT9/RPSA/DAPK3/ATF4/P  
5/CAPNS1/CDK5/LAMTOR1/CTTN/CHMP3/IFI16/GSK3A/WDR45B/OSBPL7/DRAM2/MAP1LC3B/VPS28

BCL3/LAG3/TSTA3/OTUB1/IL18BP/PRR7/HLA-DQA2/LAMP3/MYO1G/ULBP2/PIK3CD/CXCL13/KDEI

'PIK3CD/CAMSAP2/TNC/RAC1/ACTB/CDK5/NREP/CTTN/PLXND1/RAB10/C12orf57/TUBB2B/FGFR2/  
'IL1B/WFS1/NFAM1/MAPK11/COMMD7/DVL2/PSMD10/SMARCB1/LRP8/RHEBL1/RPS3/ANXA4/PRKD2/

'UBR5/RASSF5/SIX1/TNP01/DMAP1/IP09/NXT2/KPNA6/IP04/TAF3/PAF1/PIN1/SUPT7L/ABCA7/1  
./DAXX/RAPGEF1/PIK3R5/MAP3K1/MAPKAPK5/ADORA2B/UBE2N/KITLG/CCL19/PIK3R6/IRAK2/EGF  
'TRIM46/SEMA6B/LHX2/SEMA4C/RGS4/PTPRS/MUL1/SHTN1/UNC13A/TTL/BCL11A/DPYSL2/DVL1/5

1A/MAPK3/HSPA8/OAZ1/LCP1/RHBDF1/IL27RA/TCIRG1/DKC1/PAK1/CAPN10/TNFRSF4/STX1A/SC  
PAFAH1B2/EEF1A2/ABL1/IL10RA/NPRL3/UBQLN4/BAD/PSAP/PRKAA2/PTK2/VPS35/PLK3/SH3GLF

NTS12/CT45A1/EXOSC8/ELL3/CDK9

/CASP3/VPS26A/PIP4K2B/USP36/UBQLN2/ULK1/HTRA2/ATP6V0A1/TBC1D25/SESN2/NOD1/TSC1/  
IEFL/LRP4/WNT5A/OLFM1/WNT3A/KIF13B/NRP1/ZFYVE27/SHOX2/ILK/ZEB2/SLIT2/ZSWIM6/SEM

126/YIF1A/DERL1/CUL7/UGGT1/UGGT2



2/CXCR4/FAM83D/CCL26/MIF/CD300A/PRDX1/IQGAP1/SH2D3A/LEFTY1/PSMD2/RGS14/MAPK3/P2  
3E/PAK1/SLC39A10/FPR1/MNDA/THY1/THEMIS2/IRF1/IRF3/C3AR1/HSP90AB1/F2RL1/ARPC2/R  
O1B/HIP1R/SLC9A3R1/MT3/NCKAP1L/CAPZA1/RAP1GAP2/MKKS/FHOD3/SNF8/HCLS1/KDM1A/WNT7  
MT1/PLEKHA4/FRAT2/DAPK3/CSNK1D/FZD2/AXIN1/NLE1/MITF/WNT7B/GPRC5B/RAC1/CBFB/PSME  
B/METRNL/APBB1/SRF/CAPRIN1/RHOA/RAPGEF1/GPC2/NIN/DPYSL3/AP2A1/IST1/ARF1/SNX3

IYCN/ERI1/MAEL/TP53

N2/TRPT1/OSGEP/ELP5

TTN/MEG3/SPOCK1/RNF157/PHB/DNAJB2/TGFB2/TAF9/GSK3A/PML/CXCL16/WASF1/PSMD10/CDKN

/MTPN/RBPJ/IST1/EIF4G2

MRPL30

'RBMX/PSMC3/CD38/PSMC5/UBE2N/CCL19/XCL1/CCL3L3/IRAK2/CCL8/DAB2IP

:TDNEP1/PPP1R16A/SWAP70/FAM220A/DMPK/PGAM5/PPP1R15A/PPP5C/IGBP1/TIMM50/PPP4C/PTF

'AL2/TRIM46/SEMA6B/SESN2/SEMA4C/RGS4/PTPRS/MUL1/PPP2CA/SMAD3/TP53/BCL11A

P3/RPS7/CSK/BAG2/PRKRIP1/PTPN2/PTPN1/RPL5/DUS2/HNRNPU/PAK2/DUSP7/TARBP2/PPM1F/F

2/CXCR4/FAM83D/CCL26/MIF/CD300A/PRDX1/IQGAP1/SH2D3A/LEFTY1/PSMD2/RGS14/MAPK3/P2

CL17/CALM2/PDCD10/CSK/MAPKAPK3/CCND3/DBNL/ERP29/THBS1/ADAM17/PTPN1/RPS27A/VEGF/

.B/MAPT/TGIF2/PRPF19/CBFA2T2/STMN2/RASAL1/DBNL/PLXNC1/STYXL1/FIG4/MOB2/LLPH/VEGF

IAG/GPS1/HEG1/SH3BP5L/GMFB/DUSP18/CAV1/DAB2IP/RPTOR/EPHB2/CIB1/DUSP22/PTPRC/CDK5

MIN5/TP53/TARDBP/TNPO2/TPR/NUP50/STAT3/IP011/SNUPN/SMN1/JUP/IP05/NUP133

JRL1/WDR12/MYC/ERH/WWP2/HIF1AN/NOD2/DLK2/EPN1/MAML1/APH1A/MIB2

IA

TD1A/TP53/IWS1/ARRB1/TPR/RNF40/OGT/ZBTB7B/WDR70/TRIP12/KMT2A/JARID2

C1/TSN/EXOSC9/EXOSC10/DX0/EXOSC7/UBA52/POLR2I/UTP20/EXOSC1/NOB1/RFC5/ENPP2/TOE1

'MAPKAPK3/DBNL/ERP29/TNFSF15/THBS1/PTPN1/RPS27A/VEGFA/PLA2G1B/PAK2/TRAF4/UBA52/I

orf57/TUBB2B/FGFR2/GRB7/EMB/SEMA4B/GRB2/PARD6B/LLGL1/SEMA4D/APP/MAPK7/SEMA4F/SEM  
[1/CTSD/HSPE1/PDCD5/FADD/CLEC7A/RACK1/DAP/TNIP1/MAPT/PDCD6/CYCS/MTCH1/HSPD1/PIDI

'MCHR1/S1PR3/GRIN2D/MCOLN3/PLA2G1B/JPH1/CACNB3/CXCR6/TRPV6/CACNA1D/CD38/ATP2B4/I

AB3A/CD2AP/RAB11A/GOLPH3L/VPS37B/VPS11/AP3B1/STXBP1/TAPBP/TAP2/GOSR2/FNBP1L/SN

I2/OR5I1/OR5P3/OR2J2/OR4C15/OR8H1/OR2F1/OR2W1/OR1A1/OR4S1/OR7D4/OR10C1/OR51A7/OF

3/ESRRA/SETD1A/RASSF2/LILRB1/GNAS/RNF41/L3MBTL1/PURB/ROR2/STAT3/KMT2A/SCIN/RBM15

BP1/TRMT10C/ANKRD16/METTL16/MRM1/CDKAL1/RBM15/TRIT1/PCIF1/ADAT2/ELP6  
3/STX8/DENND2A/GBF1

8/MRPL38/MRPS30/MRPS27/MRPS18A/MTG2/MRPL43/GATC/MRPS9/MRPL50/FASTKD3/MTRF1L/MRF

IBXN2A/HPS4/GABARAP/ATG9B/ARSB/STX12/TMEM41B/NPRL2/AMBRA1/WIPI2/CHMP5/ACP2/ZKSCANL

BDP

POLD3/SFRP2/NFATC4/HVCN1/SIPA1/PALM/CHEK2/BAD/RAD1/BCL10/PTGER4/DNM2/CASP8/FNTE  
POLD3/SFRP2/NFATC4/HVCN1/SIPA1/PALM/CHEK2/BAD/RAD1/BCL10/PTGER4/DNM2/CASP8/FNTE

PSMB6/PFDN5/PSMA3



7A/FBXW5/TRIM21/UBA52/RNF213/UBR5/PSMC3/UBE2D2/CHFR/NMI/TRIM69/RNF8/UNKL/PSMC5/  
RPS27A/VEGFA/PAK2/TRAF4/COPS5/UBA52/MAP3K10/CCDC88C/TPD52L1/DAXX/RHOA/STK3/EMC1  
F/RHOA/RAPGEF1/ACTN4/HEG1/EPHA2/CORO2B/NPHP4/GPBAR1/CAV1/LDB1/RAB13

PIN/GPX1/MSH2/RUVBL2/USP1/BEST1/UBE2A/GRB2/TOPBP1/APP/XRCC6/HMG1/CARD16/RRM1/E  
ATP6V1C1/RRAGD/FOXK1/MAD2L2/PSMD2/HIF1A/MAPK3/NUPR1/HSPA8/RRAGC/OAZ1/RHBDF1/DKC

HA01/CYP4F2/SULT2A1/AGXT/CYP4A11/PCK1

MT/DMAP1/TYW3/RBM15B/DIMT1/MECOM/SUV39H1/TRMT2B/METTL21A/PAGR1/METTL4/PAF1/MET1  
YT11/HYAL2/IFNG/ANXA1/AIM2/TLR1/NOD2/ARG2/CPTP/LILRB1/RASGRP1/MAPKBP1/PPP1R11/N

5A/CTNNA1/SRGAP2/PTK2/NOTCH1/TMEM98/S1PR3/VEGFA/RAB29/IFRD1/NOTCH3/CDK5R1/RHOA/

DF1/DKC1/RNF19B/GNA12/NPM1/POLR2G/BMF/PDCL3/NPC1/DDA1/YBX1/GPSM1/HSP90AB1/PABPC1

y/VCL/TRIP6/CSK/CDH24/MPP7/CTNNA1/PTK2/THBS1/CD177/VEGFA/ACTN1/PPM1F/PARD3/TLN1/

LL2/FGFR1/DVL3/JAG2/SIX2/FZD2/KRT8/NLE1/NASP/EMG1/WNT7B/HCFC1/CDKN1C/TULP3/STMN  
i/GRB2/SYDE1/CDC42/ARHGAP18/CDC42SE2/MYO9B/OCRL/SPRY4/CBL/ARHGDIA/RASAL3/FGD1/OF

1/CRABP2/SASH3/NRCAM/BASP1/SMARCA4/ACTL6A/SOCS1/PPP1R9B/OSGIN2/GDI1/PPARD/LEF1/  
D/BCL3/DUSP2/SRI/NOC2L/CPNE1/NONO/KDM1A/LYN/ITGB1BP1/CCDC22/DUSP4/IL1B/GBA/KCTD

./KMT2A/CPA4/GTF3C4/BRCA2/GTF2B/SETD5/GATA3/KAT7/KANSL1

2L3/FGR/MAPK11/TGFB2/CASP1/GSK3A/VPS28/OXCT1/PTPN23/GSDMD/ACSL3/BAG3/IL4R/TGFB2  
3/SOAT1/BCL3/FERMT1/COL5A2/FLOT1/ADAM8/COL6A3/CAPN1/PHLDB1/TNC/ITGA2/PLA2G7/CAPN

IP7A/SALL2/FGFR1/DVL3/JAG2/SIX2/FZD2/KRT8/NLE1/NASP/EMG1/WNT7B/HCF1/CDKN1C/TULF

IL12/CAV1/DAB2IP/DKK1/CBY1/BMP2/PSMB1/WWTR1/STK4/KREMEN2/PSMB6/NXN/PFDN5/PSMA3  
/CNR1/LOXL3/NFKBID/CASP3/BCR

IT10/RHBDF1/HLA-DQB2/HLA-A/AP4M1/B3GNT5/GBGT1/CHST1/ABCB6/PTGES2/FUT4/STX6/B3GN1  
;G01/SMARCA4/ACTL6A/IRF1/COPS9/STAT1/XRCC3/RRS1/HDAC1/DDX11/E2F4/PPP1CA/PPARD/IN  
D2/SYNGR1/DNAJC5/TCN2/CXCR4/DDOST/EPDR1/ATP6V1C1/HLA-DPB1/CLTA/UNC93B1/FTH1/RR/  
3L/SSRP1/ACTB/MTA2/TCP1/LOXL2/SWI5/SFPQ/DNMT3A/SIRT7/PML/UBA1/NSMF/SMARCB1/CPSF6  
51AP1/RCC1/SPAG5/CENPO/EZH2/EXOSC4/CDK4/C11orf80/MAD2L1/DNMT1/ALYREF/MUC1/CENPL  
C/OLA1/DHX37/SDCBP2/CD2BP2/MAD2L2/JMJD6/HSPA8/APEX2/MAP1S/CHD3/PES1/DKC1/CDCA71  
D2/SYNGR1/DNAJC5/TCN2/CXCR4/DDOST/EPDR1/ATP6V1C1/HLA-DPB1/CLTA/UNC93B1/FTH1/RR/  
ATP6V1E1/GBA/GNB2/LAMTOR5/LAMTOR1/TMEM9/NFAM1/GNB1/KXD1/AP2M1/ABCA2/DRAM2/SLC29/  
PCN1/CTSK/CHIT1/ATP6VOD2/SYNGR1/DNAJC5/TCN2/CXCR4/DDOST/EPDR1/ATP6V1C1/HLA-DPB1  
IC1H1/LZTS2/DDX11/CEP85/KRT18/CCT4/SNX10/CEP89/GPSM2/FLOT1/HAUS1/RAP1GAP2/AUNIP/  
HSPA6/NROB1/NCKAP5L/NDN/TRAF5/CCDC124/BRSK1/STIL/OLA1/RRAGD/RUVBL1/SSNA1/RGS14/  
C1/BEX4/DDX11/CEP85/INCENP/AGBL5/CBX3/CEP89/DYNLT1/GPSM2/HAUS1/FBXO5/RSPH1/AUN1  
LC4A2/PAK1/GNA12/NPM1/BAIAP2L1/THY1/ITGB5/CORO1C/CDH6/PALLD/RPS2/ARPC2/PABPC1/F  
PLEKHM2/PSENEN/SORT1/RAB35/PIP5K1C/IRF7/SNX10/EHD1/CD68/ARHGAP1/HLA-DQA2/LAMP3/  
DPA1/DTNBP1/ABCC4/ATAD3B/TRAF2/AREG/ATP6VOD2/SYNGR1/VOPP1/DNAJC5/RAB32/COLEC12/  
IMCH1/MARK2/PDLIM3/SH2B2/CORO1B/NDC1/ABLIM2/HIP1R/SLC9A3R1/LASP1/FLOT1/ACTG1/TN  
MC4/U2AF2/SRSF9/SNAPC2/SNRPC/GEMIN7/ITGB1BP1/NOP58/ATXN2L/EHMT2/SNRNP40/AKAP8L/  
TP1/TMEM163/VDAC1/WFS1/COPZ1/CLTB/RAB10/NCALD/KCNK9/BGN/APH1B/HLA-B/SYT12/ICA1/  
A1/ADAM15/CTSA/BSG/TRPM2/QPCT/RHOG/ISLR/TUBB4B/GRN/TNFAIP6/RAB11FIP5/CD53/PLAU/  
AREG/ATP6VOD2/SYNGR1/VOPP1/DNAJC5/RAB32/COLEC12/DDOST/CD300A/ARFGEF3/FLOT2/IQG/  
EF/MUC1/CENPU/EME1/ZNF385A/MAGED1/HMGB3/CREB3L1/CHEK1/RAN/HSF1/NABP2/KIF18A/RAN  
IGAT5/HLA-DPA1/LIMK2/AREG/TRAPPC4/RAB6B/RAB32/ENTPD6/CANT1/HLA-DPB1/CLTA/MOSPD1/  
A/HLA-DQB2/TCIRG1/FUCA2/CD63/ABCB6/STK11IP/SLC35F6/RNASET2/FPR1/MNDA/PTGES2/GYC  
B/CORO1C/SCAMP4/HGS/NPC1/RAB7B/PLEKHM2/PSENEN/SORT1/RAB35/PIP5K1C/IRF7/SNX10/EF  
/STAT1/XRCC3/HDAC1/DDX11/E2F4/PPP1CA/PPARD/INCENP/CBX3/DVL3/BLM/NHP2/HDAC2/KDM1  
EC/LAMC2/LCP1/MAP1S/MAP2K2/BSPRY/TPD52/CYHR1/PTGES2/STX6/RAB3B/RASEF/NPC1/HSP9C  
2K2/SLC4A2/PAK1/PERP/GNA12/NPM1/BAIAP2L1/THY1/ITGB5/CORO1C/CDH6/PALLD/RPS2/ARPC  
1/UNC93B1/ZDHHC7/B4GALT5/CREB3/GBP2/TMEM165/GALNT10/RHBDF1/HLA-DQB2/HLA-A/AP4M1  
ATP6V1E1/GBA/GNB2/LAMTOR5/LAMTOR1/TMEM9/NFAM1/GNB1/KXD1/AP2M1/ABCA2/DRAM2/SLC29/  
T5/SPAG5/FHL3/MAPRE1/TUBB/RUSC1/NME2/TWF2/ASPM/EZR/KRT7/COL3A1/ANKRD1/DCDC2/MII  
T5/SPAG5/FHL3/MAPRE1/TUBB/RUSC1/NME2/TWF2/ASPM/EZR/KRT7/COL3A1/ANKRD1/DCDC2/MII  
IC13D/CD109/TUBB/CSTB/TMSB4X/S100A8/LYZ/NME2/F13A1/ADAM15/CTSA/BSG/SYNGR2/TRPM2/  
5/FHL3/MAPRE1/TUBB/RUSC1/NME2/TWF2/ASPM/EZR/KRT7/COL3A1/ANKRD1/DCDC2/MID1IP1/TU  
B/KIF3C/KIF18A/CCT6A/RHOQ/KIF21B/WIPF3/CCT3/CARMIL1/GAS2L3/NCKAP5L/MAP2/IFFO2/1  
NRPF/RPL17/RPLP2/NOC2L/EIF3D/MRPS23/NHP2/CNOT9/LSM7/POP7/RPSA/LSM10/KPNB1/U2AF2  
NCOR2/CBX8/PCGF2/TELO2/RBBP7/DPF2/INO80C/TIMELESS/POLR3D/ESCO2/RARG/MTA3/EME2/5  
DYNLRB1/CCT2/DYNLL1/DYNC1H1/CAPN6/KNTC1/BEX4/LZTS2/INCENP/KIFC2/CCT4/MT3/TPPP3/  
U1/CORO1B/PIP5K1C/PPIA/TGM2/LASP1/FERMT1/FLOT1/ACTG1/RPLP2/FGFR3/SH3KBP1/PAK4/F  
RO1B/PIP5K1C/PPIA/TGM2/LASP1/FERMT1/FLOT1/ACTG1/RPLP2/FGFR3/SH3KBP1/PAK4/FOCAD/  
U1/CORO1B/PIP5K1C/PPIA/TGM2/LASP1/FERMT1/FLOT1/ACTG1/RPLP2/FGFR3/SH3KBP1/PAK4/F  
A2/ATP6VOC/C5AR1/TMEM63A/ABCA3/ICA1/STK10/GPR84/SYT1/LAIR1/CYSTM1/CPE/CLEC5A/TBC  
ILT1/FERMT1/FLOT1/MYO1G/ATF4/PSTPIP1/CDC42BPG/ITGB1BP1/RAC1/PDE9A/BCAR1/CDK5/CT1  
/CBX3/BLM/NHP2/SCMH1/ITGB3BP/CDK2/KDM1A/DCTN2/KNSTRN/SSB/DCTN5/CENPI/DNMT3A/THC  
CPNE1/ATP6V1H/CLN3/SLC36A1/HLA-DRB5/RPN2/SLC26A11/ATP6V1E1/GBA/GNB2/LAMTOR5/LAM  
A14/RPL19/MRPL37/RPS11/RPL22L1/NSUN4/RPL13A/MRPL27/MRPL28/RPL37A/MRPL51/MRPL11/F  
15/SGTA/RPS16/CASP8/RPL5/RPS27A/RPS12/CTBP2/CYB5R3/RPS4X/HBE1/RPL6/RPL37/RPL27/  
/CENPB/ZNF207/CHMP1A/TOPBP1/NUP107/RAD21/NIFK/CENPN/RAD9A/NDE1/ZWILCH/CKAP5/EII

./PLEKHH2/RHOA/PDPN/FAP/PARVB/DPYSL3/EPHA2/KITLG/HAX1/RAB13/CIB1/DUSP22/ACTG2/AN  
ENPN/NDE1/ZWILCH/CKAP5/SUV39H2/ESCO2/SEC13  
NRNP25/LUC7L/SF3B2/MFAP1/PRPF4/DHX38/GEMIN2/SRSF1/SRSF2/CASC3/SNRNP70/DHX8/RBM8  
PL37A/MRPL51/MRPL11/RPLP1/RPL32/RPL30/MRPL15/C12orf65/MRPL4/SURF6/RPS9/RPS14/RF  
ID7/GMFG/PRDX4/CCT8/TBC1D10C/PAFAH1B2/ARPC5/VCP/VCL/PDAP1/BIN2/DBNL/HSP90AA1/CSN  
IBA/GPC2/HEXA/IST1  
IF20B/KLHL21/NEK6  
B2/CIB1/CYTH3/SNX5/C2CD5/ASAP3/MTMR14/MYO1C/NCKAP1/PLCG1/LAYN/ABCA7  
RHOA/RNF8  
2/SLC2A3/TSPAN14

P1/APEX1/SLX4/MEN1  
/APPL2/TLR1/MPEG1

.4/MRPL24/RPL10A/MRPL55/ZNF622/RPL12/RPL26L1/RPL22/GEMIN5/MRPL21/RPL31/MRPL42/MF

PS17/RPL26L1/RPL22/GEMIN5/RPS15A

'DDIT3/HLA-DPA1/HLA-DMB/DTNBP1/TPCN1/CTSK/ATP6V0D2/CARMIL1/JAK3/CHMP4B/SNX8/WASF  
K3CD/ANAPC7/CDK2/SPSB1/CHRA1/PRIM1/HCF1/TRMT61A/KRTCAP2/RPN2/ACTB/FBXO32/PFKM  
IC1/TNFRSF1B/CD59

51A3/TSG101/STOML1/CHMP4A/MCOLN1

ERCC1/MED27/BCL9L/TAF1D/PTOV1/IVNS1ABP/GTF2E2/AIP/RBM14/TEAD3/SIX1/MED7/NR1H2/RU  
157/SLC27A4/SLC26A2/EPB41L3/TBC1D10C/MAPT/CSPG4/NF2/CDHR2/SGCE/PALM/WWC1/TTYH1/

'DTX2/GTPBP4/MRPS23/CPNE1/RAP1GAP2/HTATIP2/KPNB1/XPOT/ANXA11/DCTN5/UTP18/DNAJB2/

'EGF/EPN3/ATP7A

.HL12/PEF1/EGF



EF1/CALM3/CUZD1/RAB1A/CD59/SYT11/HLA-C/MCTP2/VAMP3/RAB3C/VAMP1/HLA-E/CHGA/SEMA4

ACA/IP6K2/COIL/TRIM27/CC2D1A/WDR12/YY1AP1/MLLT1/CHCHD1/TERF1/FAM111A/POLR1C/WDF

FIP2/WDR1/RASAL3/PARD6G/NF2/EMD/KDF1/ACTR3/BIN2/DBNL/PTK2/SPIRE1/DCTN1/CAPN2/C1  
R3IP1/YIPF5/CCDC88A/HLA-C/IGF2R/ARCN1/HLA-E/YIF1A/CNIH2/SEC23B/TEX261

P6VOE1/RALA/ARRB2/CALR/CDC42EP2/OCRL/STX4/VIM/ATP6VOD1/WNT4/CEMIP/HVCN1/STX7/V/

P1S3/AP1S2/TJAP1/COG4/ATG9A/BECN1/COG2/ARF1/RAB9A/ATP11A/YIPF1/PI4K2A/RAB13/ATF

-C/VAMP3/RAB22A/CD207/ATP6VOA1/HLA-E/RAB7A/APPL2/TLR1/CD163/FCGR1B/HIP1/RAB11FIF

FTFTR/AAK1/RAB3A/SREBF1/MY06/HLA-F/AP2A2/PACIN1/ERGIC3/COPB2/VPS11/AP3B1/CLTC/AF  
:/RGS14/SYT8/HSPA8/CD3E/SHARPIN/PDZD11/LAMA5/NRCAM/STX1A/STX6/RAB3B/BIN1/CAD/GAF  
/ACLY/DYNLT1/GTPBP2/C1orf35/CAP1/KPNB1/RNASE2/MAGED2/PDGFA/GNS/FTL/FGR/PSMA5/TC

IA/PAXIP1

6/POLR3D/S100BPB/MAPT/PRPF31/SNRPB2/PRPF19/CHTOP/SART1/PHF5A/NFATC4/RUFY1/PRKA/  
8/CTSD/CD8A/FADD/BTK/CBL/LDHB/CLIP3/MAPT/HPSE/SLC25A5/CSK/TRADD/BCL10/CTNNA1/AI

8/CTSD/CD8A/FADD/BTK/CBL/LDHB/CLIP3/MAPT/HPSE/SLC25A5/CSK/TRADD/BCL10/CTNNA1/AI

MALT1/LEO1/SUPT20H/WDR43/YBX2/TAF4B/PLRG1/CDK12/MBD6/TOP1/CRIPT

IK1/CD48/CTSD/CD8A/FADD/BTK/CBL/LDHB/CLIP3/MAPT/HPSE/SLC25A5/CSK/TRADD/BCL10/CTN  
28/EXOC6/MYO1A/ACTR2/UNC13A/MYL12B/MYH9/HIP1/EXOC6B/MYZAP  
:/DTNA/MYZAP/ACP1/NPTXR

/APP/GDPD5/AP3D1/KATNB1/CBL/MYO5A/SCN1B/CCDC120/EPB41L3/ATP6VOD1/MAPT/KCNAB2/AF

IAL2/MAX/SMAD2/ERCC2/E2F7/HOXB9/BRF2/GTF3C3/MED17/SMAD3/GEMIN5/SUPT3H/TP53/TBPI

IPINB1/PPIA/ACLY/DYNLT1/GTPBP2/C1orf35/CAP1/KPNB1/HSPH1/RNASE2/MAGED2/PDGFA/GNS/  
TULP3/CTTN/MYADM/WAS/SFPQ/AP3M2/CLTB/RAB10/MAP1LC3B/FGFR2/PFN1/WASF1/MAP4/GAD1/  
3/PACIN1/CDK5R1/PARD3/PRSS12/EXOC3/APBB1/HNRNPR/AP1S1/ACAP3/NIN/DPYSL3/PREX1/C/

'ANAPC5/CDC27/UBE4B/AUP1/ZER1/MAEA/KLHL12/PEF1/PCGF3/FBX06/STUB1/ANAPC4/DDB1/FB

{PINB1/PPIA/ACLY/DYNLT1/GTPBP2/C1orf35/CAP1/KPNB1/HSPH1/RNASE2/MAGED2/PDGFA/GNS/

'2H1/PHKG2/POLE3/BECN1/TAF13/TBP/MMS19/PIK3R6/POLR2E/POLE2/GTF2F1/TAF3/ERCC3/ZNF

'KBP15/WHRN/DOCK7/TRAK2/TSC1/SHTN1/EXOC6/RAC3/MAP3K12/FEZ1/NEFL/DVL1/OLFM1/NPTXF

;24/MRPL33/TIMM23/NDUFB4/TIMM8B/MRPS5/MRPL36/NDUFA9/NDUFB11/MRPL14/NDUFA12/COX5/

iC14/RAB11A/YIPF2/MITD1/ARL8B/VPS37B/VPS11/GOSR2/RAB27B/LGMN/IFITM3/ATG9A/VPS33/  
;LC1A4/HSPA8/CD3E/MAP1S/PPP2R1A/SHARPIN/PAK1/THY1/FCHSD1/MCRS1/RTN4RL2/RBM3/IFT

'RAK2/TSC1/SHTN1/EXOC6/RAC3/MAP3K12/FEZ1/NEFL/DVL1/OLFM1/NPTXR/ABI1/TAOK2/MAPK81

!;/PALM/PRR12/DBNL/SRGAP2/DNM2/VPS35/GRIN2D/RPL6/PAK2/LZTS1/ADD3/FBX045/CDK5R1/AE

.A-C/VAMP3/ULK1/VPS33B/DENND6A/HLA-E/SORCS2/ACKR3/GRIPAP1/RAB11FIP1/ARHGAP44/AC/

'CASC3/DHX30/MOV10/RPS6/USP3/OGFOD1/BTBD1/POLDIP3/FASTKD5/DCP2/AGO1/DYRK3/APOBEC  
NM2/VPS35/CTBP2/ACTN1/PAK2/PACSIN2/FBXO45/BCAN/CANX/RAB11A/ACAN/DGKQ/PORCN/PRK/

;AP2/DNM2/VPS35/GRIN2D/RPL6/PAK2/LZTS1/ADD3/FBXO45/CDK5R1/ABHD17A/MINK1/RPL30/BC

IB27B/ACER3/COA3/FAR1/STEAP2/MFN1/BET1L/TIMM23/ERGIC2/CNR1/SC02/QSOX2/IER3IP1/TF

;SFPQ/DNMT3A/ATAD2/SIRT7/NAP1L4/NAP1L2/SMARCB1/MSH2/NCOA5/CHD4/RUVBL2/CENPB/RBE  
IED19/PIAS3/KDM5B/UBE2L3/CBX4/MIER2/TAF9/PQBP1/DNMT3A/PML/KCTD1/SMARCB1/ZMIZ2/VI  
K4/CCL2/DAPK3/CSNK1D/CDK2/TESK1/STK17B/LYN/CDC42BPG/PKN3/ALPK3/CDK5/MLKL/FGFR/M/  
JBB2A/MRPS12/RPS2/ARPC2/FMOD/COPE/ARPC3/CLDN10/NUP93/MRPL47/NUP205/PDLIM3/KRT18/  
'8/DBF4/ARHGAP1/RAP1GAP2/SIPA1L2/ARHGDIB/TBC1D30/GPRC5B/ADRM1/DNAJB2/TBC1D13/RAS  
IAPRE1/LARP6/TMSB4X/MX2/RUSC1/S100A8/TWF2/MAPK8IP2/FMNL2/EZR/ANKRD1/DCDC2/LSP1/F  
4/HK3/EPHB6/CAD/DGKG/DYRK2/CSNK1E/MARK2/EPHB3/RPS6KA4/PIP5K1C/FGFR1/PIM2/CCNO/F  
JB/RRAD/ABCC4/ATP6VOD2/RHOC/RAB6B/RAB32/HSPA6/ENTPD6/DHX34/CANT1/ATP6V1C1/RAB15/  
JB/RRAD/ABCC4/ATP6VOD2/RHOC/RAB6B/RAB32/HSPA6/ENTPD6/DHX34/CANT1/ATP6V1C1/RAB15/  
JB/RRAD/ABCC4/ATP6VOD2/RHOC/RAB6B/RAB32/HSPA6/ENTPD6/DHX34/CANT1/ATP6V1C1/RAB15/  
'ABCC4/ATP6VOD2/RHOC/RAB6B/RAB32/HSPA6/ENTPD6/DHX34/ATP6V1C1/RAB15/MYL6B/ABCC5/C  
.C12A2/MAPKAPK2/FAM83D/MSN/BRSK1/IQGAP1/CD2/MAD2L2/RGS14/HIF1A/ITGAX/CD3E/PAK1/S  
IP1/CD2/MAD2L2/RGS14/HIF1A/ITGAX/CD3E/PAK1/STK11IP/NPM1/SPRED1/PCNA/THY1/RHOF/SJ  
D3E/MAP2K2/AP4M1/MRPL17/UBE2I/STX1A/RAP2B/BASP1/CHAF1A/TUBA1A/SIRPA/NOL3/HGS/IF  
J9/SERPINH1/CSTB/CDK4/GIT1/DPM2/ASAP1/GUCA2A/CTSA/ADAP2/NCF4/CDKN2D/RPS6KA1/TBC1  
1/IQGAP1/EFHD2/PROM1/OLA1/RUVBL1/LRRC59/HSPA8/PLEC/LCP1/JAML/MICALL1/PPP1R13L/N  
2/EHD1/NCKAP1L/SYTL1/PAK4/ARHGAP1/RABIF/RTKN/RANGRF/DAPK3/ARHGDIB/KPNB1/TBC1D30/  
2/MYO1G/CAP1/CAPZA1/MYO1F/YWHAH/FHOD3/HCLS1/PSTPIP1/ARPC5L/CTTN/CORO2A/WAS/VASH2  
/GRK2/DMPK/MAPK7/MAP3K6/RPS6KB2/DSTYK/STK25/VRK1/CSNK1G2/STK38/OBSCN/CCL3/CDK15  
3/KIF15/PSMC4/ATAD2/ABCA2/ATP6VOC/KIF2A/ATP6V0E1/CDK7/MSH2/RUVBL2/RBBP4/ABCA3/1  
'TBC1D30/XPOT/PKN3/RAB11FIP4/RAC1/KCTD10/WAS/LSM2/TBC1D13/DVL2/PFN1/WASF1/ABR/SE  
'TBC1D30/XPOT/PKN3/RAB11FIP4/RAC1/KCTD10/WAS/LSM2/TBC1D13/DVL2/PFN1/WASF1/ABR/SE

IGAP18/RANBP1/AHSA1/AGAP1/DNAJB6/GRPEL2/CDC42EP2/MY09B/OCRL/DNM1L/PGAM5/RALGDS/  
i/STMN3/NCALD/MAP1LC3B/MAP4/RAE1/KIF2A/RPS3/ZNF207/FHDC1/CETN2/DNM1L/PPP5C/PDCD5  
.D/LASP1/PPME1/SLC3A2/EHD1/PAK4/ARHGAP1/LYPLA2/CAPZA1/CSNK1D/SH3GLB2/ATXN2L/HCF  
ALA/NKIRAS2/CDC42/AGAP1/DNM1L/RALB/RGS3/DRG1/RERG/RHEB/RAB4B/EEF1A2/RAB3D/DIRAS  
TNFSF15/ADAM17/CASP8/VEGFA/TRAF4/TMBIM1/CD2AP/TRIM37/INHA/KITLG/CCL19/XCL1/BMP8  
RALGDS/ARHGDI1/RIC8A/RGS3/TBC1D10C/RASAL3/TBC1D22A/CHN1/TBCD/NPRL3/RASAL1/SIPA1  
RL3/RASAL1/SIPA1/ARAP1/TBC1D7/SGSM3/ARHGAP11A/SGAP2/TBC1D22B/ARHGEF11/SMAP1/PI  
AP/DCTN1/HAUS7/KATNA1/MAP1A/MARK4/MAP7D3/LZTS1/FNTA/GLI1/RAB11A/CCDC88C/EML2/KI  
MARCAL1/MUS81/SMUG1/POLE2/HMGA2/DCLRE1C/ERCC3/DNASE1L1/METTL4/DHX30/EXO5/POLG2/  
HGAP17/RALBP1/ARHGEF18/NCKAP1/BCR/NOX1/RHOH/TIAM2/SGAP1/TRIO/DOCK11/EPS8L2/KCT  
B1/VPS4A/COIL/ATP1B1/PPARG/MY01C/PRRC2C/PPP1R9A/EFHC1/HIC2  
IG2/PRMT6/BRD7/CTSL/SPIN4/PHF13/BRD4/ASF1A/IP07/SPIN1/SUPT6H/PRKCB/KDM4A/SUPT16F  
MRPL15/MRPL4/RPS9/RPS14/RPS27/MRPS24/RPL29/MRPL33/MRPS5/RPL13/MRPL36/RPL4/RPL41

MAPK3/MAST2/MAP2K2/DKC1/PAK1/PRKX/FGFR4/POLR2G/CD3EAP/HK3/EPHB6/CAD/DGKG/DYRK2/  
D/LUC7L/RBM24/EIF4G2/EIF4G3/UTP23/LSM1/KHSRP/RPS14/PABPC1L/LARP1/SRSF1/SNRNP70/  
31/SNX3/DAB2IP/GTF2F1/ENSA/ANAPC4/PPARG/KIF3A/PPP1R9A/SMG7/PXN/CD22/MFHAS1

K3R6/GMFB/EGF/RPTOR/CALM3/CIB1

KG/DYRK2/CSNK1E/MARK2/EPHB3/RPS6KA4/PIP5K1C/FGFR1/PIM2/CCNO/PNKP/FGFR3/PAK4/PIF  
PD1/SLC25A5/ZNF746/VCP/VCL/WRAP53/BAG2/CHEK2/BCL10/HSP90AA1/ACVR1B/TNK2/CASP8/F  
L/AP2A2/RBM14/VPS11/GATAD2A/AP2B1/ARRDC1/AP2A1/KSR1/MMS19/CDYL/CAV2/PEF1/FRMD4/

P/VCL/WRAP53/BAG2/CHEK2/BCL10/HSP90AA1/ACVR1B/TNK2/CASP8/RPL5/RPS27A/PIAS4/RAD1

'TUBG2/ARL16/ARF4/RHEBL1/POLA1/GNL2/RALA/NKIRAS2/CDC42/AGAP1/PNP/DNM1L/RALB/ARF1  
'TUBG2/ARL16/ARF4/RHEBL1/GNL2/RALA/NKIRAS2/CDC42/AGAP1/DNM1L/RALB/ARFIP2/GNL3/DF

;/ARF4/RHEBL1/GNL2/RALA/NKIRAS2/CDC42/AGAP1/DNM1L/RALB/ARFIP2/GNL3/DRG1/RERG/RHE  
;/ARF4/RHEBL1/GNL2/RALA/NKIRAS2/CDC42/AGAP1/DNM1L/RALB/ARFIP2/GNL3/DRG1/RERG/RHE

3/DAB2IP/SNX29/RPS6KC1/CYTH3/PLD1/PLEKHA8/SNX5/ARHGAP33/SNX16/CCDC88A/EPB41/SN

NL2/RALA/NKIRAS2/CDC42/AGAP1/DNM1L/RALB/ARFIP2/GNL3/DRG1/RERG/RHEB/RAB4B/DAP3/E  
VAV3/SLA2/TEX261/BICD2/NEFH/NEFL/SH2B1/HIP1/MEN1/ARRB1/BFAR



SF13B/CCL4/TGFB2/CALCA/CXCL16/IL15/TNFSF12/PF4V1/SEMA4B/TGFB3/CXCL11/SEMA4D/XCI

ILK1/RAB3IP/TMEM127/PDE6D/TBC1D25/DENND6A

;/ARF4/RHEBL1/GNL2/RALA/NKIRAS2/CDC42/AGAP1/DNM1L/RALB/ARFIP2/GNL3/DRG1/RERG/RHE  
;/ARF4/RHEBL1/GNL2/RALA/NKIRAS2/CDC42/AGAP1/DNM1L/RALB/ARFIP2/GNL3/DRG1/RERG/RHE

3/HDAC2/ATF4/YWHAH/MKKS/SNF8/HCLS1/KDM1A/ATN1/NOP58/HCFC1/FKBP4/BUD31/ACTB/MTA2

1/BCL10/PSMD9/USP21/CTBP2/THRA/MED27/BCL9L/ACTN1/COPS5/AIP/RBM14/TCERG1/DAXX/AC  
OP5/TSN/EXOSC9/EXOSC10/EXOSC7/WARS2/DDX56/TRMT12/POLR2I/DHX57/POLR2J/NOB1/NSUN4

IAI3

3B/HSBP1L1/JUNB/WWTR1/MNT/MXD4/NAB2/PRMT5/ZHX2/PFDN5/BCOR/TFEC/BRD7/NSD1/GON4L/E

I2/OR5I1/OR5P3/OR2J2/OR4C15/OR8H1/OR2F1/OR2W1/OR1A1/OR4S1/OR7D4/OR10C1/OR51A7/OF

NFSF12/PF4V1/SEMA4B/TGFB3/CXCL11/SEMA4D/XCL2/GAL/CDC42EP2/SEMA4F/GMFG/SEMA5B/CS

G1/LONP1/ATP2A3/RAD51C/DNA2/HSPA2/RAD51D/ABCB9/HSP90AA1/CFTR/KATNA1/RAD18/HSPA5

VHL/TNFAIP3/RNF216/RNF2/PIAS4/RAD18/MED27/TRIM21/UBE2Q1/TRIM37/RNF213/RNF25/UBF

.RF3/YBX1/STAT1/FOXK2/E2F8/HDAC1/E2F3/BATF2/TFE3/DDX11/SUB1/E2F4/KLF16/PPARD/LEF

A/TUBB2A/SGO1/TLL1/MSTO1/LMNA/DYNC1H1/SPDL1/XRCC3/CAPNG/LZTS2/MARK2/CEP85/E2F1/KN2A/MCM6/TUBG1/RACGAP1/EIF4EBP1/CENPW/ARHGEF2/DSCC1/NCAPH/MCM10/REEP4/SMARCD3/RHOC/CXCR4/SEMA4A/NDN/MAP2/DOK1/MSN/BRSK1/IQGAP1/B4GALT5/EFNA5/RAB25/MAPK3/LAMC1/F1A/MAPK3/CD276/SERPINE1/IL27RA/CD3E/TCIRG1/MAST2/SASH3/ADGRG1/ISG15/TNFRSF4/BIRC5/IL27RA/CD3E/MAST2/SASH3/ISG15/TNFRSF4/BRCA1/MNDA/ZNF580/SIRPA/SPON2/SOCS1/CD58/CD35B/IL1B/NFAM1/FGR/MAPK11/GPSM3/PQBP1/IFI16/AGPAT2/CASP1/IL12RB1/IL15/C5AR1/RP9/PTGFA/VANGL1/TULP3/PSMB8/PSMB10/PSMA5/DEAF1/TGFB2/PLXND1/PSMD13/PSMC4/AP2M1/NDI1/AA4A/ALOX5/PLEKH02/MIF/CD300A/CANT1/IQGAP1/CFD/FTH1/STXBP2/MAD2L2/PSMD2/ITGAX/HSP90A/MIF/CD300A/CANT1/IQGAP1/CFD/CD2/FTH1/STXBP2/PSMD2/JMJD6/ITGAX/HSPA8/NEU1/GM2A/CD63/DOK3/STK11IP/RNASET2/FPR1/MNDA/PTGES2/RAP2B/GYG1/ARHGAP9/RHOF/SIRPA/DEGS1/RAP2B/GYG1/ARHGAP9/RHOF/SIRPA/DEGS1/HK3/CCT2/CD58/C3AR1/HSP90AB1/PRSS3/DYNLL1/AA4A/ALOX5/PLEKH02/MIF/CD300A/CANT1/IQGAP1/CFD/FTH1/STXBP2/MAD2L2/PSMD2/ITGAX/HSP90A/DNAJC5/VAV1/HSPA6/DDOST/ALOX5/PLEKH02/MIF/CD300A/CANT1/PRDX1/ZP3/IQGAP1/CFD/FTH1/PTGES2/RAP2B/GYG1/ARHGAP9/RHOF/SIRPA/DEGS1/HK3/CCT2/CD58/C3AR1/HSP90AB1/F2RL1/IRF3/SOCS1/IRF1/F2RL1/STAT1/RAB7B/RRS1/RRAS/HDAC1/CTLA4/TNFRSF11A/NBEAL2/PIR/FSTL3/MITF/LYN/CARD11/CBFB/PIAS3/IL2RA/NCAPH2/NFAM1/CDH17/LCK/PTPN6/THOC5/CD27/IFI16/HLA-DMB/TNFRSF18/VSIG4/CTSK/WIPF3/TRAF2/RBCK1/PSMD14/HMGB2/TRIM6/JAK3/HMOX1/WASF2/IRF7/ZC3H12A/PSME3/TNIP2/FLOT1/ACTG1/NCKAP1L/SMPDL3B/HLA-DQA2/MY01G/PIK3CD/PLSCR3/NFAM1/PSMB10/FGR/LCP2/PSMA5/NRAS/WAS/LCK/PTPN6/PSMD13/PSMC4/MUC5B/CD79A/PSMD10/3EC3C/PSMD14/CCT3/HMGB2/TCF3/TRIM28/POLA2/CACYBP/BAX/SIRT6/FAAP24/FANCG/GMNN/GIIN1/WAS/SWI5/SFPQ/PML/COPS7B/ISY1/PARP1/RNF113A/CDK7/MSH2/RUVBL2/RPS3/POLA1/USP1/MT5A/HCF1/EHMT2/AKAP8L/IL1B/ACTB/MTA2/CDK5/KDM5B/CBX4/PHB/MIER2/NPM3/CENPI/LOX10/3M10/URM1/U2AF2/SF3B5/KDM1A/SRSF9/SNRPC/GEMIN7/EMG1/NOP58/TRMT1/SSB/TRMT61A/BUD31/NCL/EIF3H/AGO2/CALR/RPL35/RPS20/APP/RPL18A/PABPC4/PPP1R15A/UQCC2/RPS19/RPS6KB2/TNFAIP6/RAB11FIP5/CD53/PLAU/GIPC1/DTNBP1/ABCC4/ATAD3B/CHIT1/PSMD14/TIMP2/SYNG1/F2RL1/EPHB6/ISL2/CCL13/TNFRSF11A/RELN/ZSWIM5/EPHB3/CORO1B/LEF1/PIP5K1C/FGFR1/INS4/PRKDC/RUVBL1/MAD2L2/CNOT11/MAPK3/NUPR1/APEX2/CBX1/PAK1/ACD/PEA15/FANCE/ISG12/MTCL1/BRSK1/EFNA5/STIL/SSNA1/RGS14/HIF1A/HSPA8/MAP1S/CENPE/CHD3/PPP2R1A/PAK1/PRKDC/SSNA1/MAD2L2/CNOT11/PSMD2/CENPE/PPP2R1A/CHMP4C/BRCA1/RBL1/NSMCE2/PCNA/TUBB2/HLA-DPA1/HLA-DMB/ABCC4/HMGB2/AREG/JAK3/HMOX1/EIF5A2/CCL5/CD86/SIRT6/CCL26/TNFRSF1R/NRNPM/KHDRBS1/HNRNPA3/PRPF31/ZMAT5/SNRPB2/PRPF19/FASTK/SART1/SYMPK/PHF5A/FAM98B/PSMD4/PSMD3/RBX1/PSMD7/TMUB2/TBL1XR1/PELI1/SGTB/RNF4/RACK1/RNF7/CUL4B/TRIM71/TICAM1/CMT1/NAA10/PCBP4/CASP2/BRSK1/MIIP/PRKDC/STIL/SSNA1/MAD2L2/CNOT11/PSMD2/CENPE/PTGFA/TMED9/ARPC3/LIMCH1/DDX11/CORO1B/NELFE/RPS6KA4/HIP1R/BID/CCT4/PNKP/UBE2J2/C14/PRMT2/S100B/SORT1/RNPS1/PRELID1/DDIT4/PPP1CA/PDCD1/TGM2/HIP1R/ZC3H12A/AIFM2/SLC13/3/PILRA/BIN1/NPC1/IRF3/RPS2/HSP90AB1/DYNLL1/STAT1/PABPC1/HDAC1/CCDC86/NUP93/DDIT4/M1A/SLC11A1/SRSF9/SNRPC/GEMIN7/SSB/TRMT61A/BUD31/RPS5/DAZAP1/SNRNP40/AKAP8L/PSMA7/UL4B/DPF2/NTMT1/SUV39H2/ZNF335/TAF12/CHTOP/TAF10/DOT1L/MTA3/PRKAA2/HDAC10/HAT1/ALOX5/NDN/SNRPA1/CCL26/TNFSF9/MIF/DOK1/GPR35/MSN/HLA-DPB1/TALDO1/IL34/EBI3/GBP2/IFI16/PN1/CAPZA1/FRAT2/FZD2/KPNB1/CAMSAP2/CLN3/AXIN1/VDAC1/AKAP8L/GBA/CAPNS1/CDK5/CTSL/3/GNL2/RPL27/FTSJ3/EIF3H/DROSHA/VCX/AGO2/SF3A3/RPL35/PPAN/DDX54/RPS19/RPLP0/NOC3/SH3PXD2B/SLC9A1/EFNA5/MAD2L2/LCP1/TPM3/KCNE5/PAK1/CAPN10/BAIAP2L1/FCHSD1/RHOF/IFI12/RAC1/MIEN1/B9D2/RAP2A/PDGFA/CTTN/WAS/POC1A/NUP85/HAUS8/TNIK/PLK4/PFN1/MAP4/IFI12/P1/TPM3/PAK1/CAPN10/BAIAP2L1/FCHSD1/RHOF/ITGB5/CORO1C/BIN1/CORO7/PALLD/F2RL1/AIFM1/11A/NBEAL2/PIR/FSTL3/CD83/BATF2/PLA2G2D/TFE3/NCAPG2/PRELID1/PSMB2/LEF1/IRF7/ZC3H1/1/RPS19/FADD/ZNF675/WDR1/CLEC5A/GPR183/CCL3/MEIS2/RARG/ACVR1B/PTPN2/THBS1/CASP8/TNFSF9/CD300A/FLOT2/ZP3/IQGAP1/HLA-DPB1/SLC9A1/EFNA5/EBI3/MAD2L2/ADAMDEC1/CD276/PSMB2/PSME3/HSPBP1/BCAP31/UBE2J2/PRSS16/FBXO5/ADAM8/VLDLR/LAMP3/LYPLA2/CTSE/CSNK1A5/MIF/CD300A/MSN/ZP3/IQGAP1/SRPX2/MIIP/CARD10/CREB3/HIF1A/RAB25/MAPK3/ITGAX/HLA/4A/NDN/MAP2/DOK1/BRSK1/IQGAP1/PTK7/B4GALT5/EFNA5/SF3A2/MAPK3/MANF/FZD1/EFNB1/C

/EPHB3/CORO1B/FGFR1/MT3/DYNLT1/DVL3/VLDLR/HDAC2/RAP1GAP2/YWHAH/CAMSAP2/TBC1D30,  
'URM1/AXIN1/U2AF2/KDM1A/BIRC7/MED8/CCDC22/CBFB/MYLIP/PSMB4/FBX032/PIAS3/KCTD10/(  
ANGAP1/RHOQ/EPB41L2/GPD1L/TRAFF2/CCT3/SAE1/TRIM6/P3H1/TRIM28/CCL5/NUTF2/PHPT1/MAI  
2/LMNA/SPDL1/RRS1/TSPAN17/LZTS2/NUP93/NXT1/FAM53B/RAB35/NUP188/ZC3H12A/CSE1L/BII  
/BL1/CD2BP2/SMIM20/LSM4/EIF3B/CD3E/CENPE/PAK1/TAF6/NPM1/BAIAP2L1/ANKRD27/STX1A/I  
R13/PSMB2/REX04/DDIT4/GPI/NDC1/NUP188/ZC3H12A/PSME3/NCBP2/RPL17/RPLP2/ITPA/CNO1  
'/XPO5/EXOSC5/SNU13/SRRT/RPL27/NCL/FTSJ3/HENMT1/POLR2L/DROSHA/AGO2/CPSF4/RPL35/1  
JASET2/FPR1/MNDA/PTGES2/RAP2B/GYG1/ARHGAP9/RHOF/SIRPA/DEGS1/HK3/CCT2/CD58/C3AR1,  
X1/TRIM28/RHOC/BDKRB1/CCL5/CXCR4/SEMA4A/CCL26/PHPT1/ITGA5/MIF/CD300A/MSN/ZP3/IC  
.1/RELN/ZNF703/LEF1/GPI/FGFR1/ZC3H12A/NCKAP1L/FBX05/ADAM8/DAPK3/PIK3CD/CXCL13/DI  
AP1L/JAG2/ADAM8/PRR7/CCL2/PIK3CD/KDEL1/FANCA/SLC11A1/HSPH1/CD209/LYN/CARD11/RAC  
JASET2/FPR1/MNDA/PTGES2/RAP2B/GYG1/ARHGAP9/RHOF/SIRPA/DEGS1/HK3/CCT2/CD58/C3AR1,  
R1/F2RL1/EPHB6/ISL2/CCL13/TNFRSF11A/RELN/ZSWIM5/EPHB3/CORO1B/LEF1/PIP5K1C/FGFR1,  
3/SAMD4B/RPL27/NCL/EIF3H/AGO2/CALR/RPL35/RPS20/APP/RPL18A/PABPC4/PPP1R15A/UQC22,  
'S1/PRELID1/PPP1CA/PDCD1/TGM2/HIP1R/ZC3H12A/AIFM2/SLC9A3R1/BID/BCAP31/TNFRSF10C,  
3P2/UBE2Z/AMIGO2/PRKDC/SLC9A1/STIL/CREB3/TNFAIP8/HIF1A/NUPR1/SERPINE1/RNF34/PEA1  
'S1/PRELID1/PPP1CA/PDCD1/TGM2/HIP1R/ZC3H12A/AIFM2/SLC9A3R1/BID/BCAP31/TNFRSF10C,  
3X3/CASP2/UBE2Z/AMIGO2/PRKDC/SLC9A1/STIL/CREB3/TNFAIP8/HIF1A/NUPR1/SERPINE1/RNF3  
ACK1/RNF7/CUL4B/TRIM71/TRIM25/RNF122/UBXN1/PSMD8/KLHL42/VCP/PSMA1/USP5/NSFL1C/UI  
3H3PXD2B/SLC9A1/EFNA5/STIL/NUPR1/HSPA8/FZD1/LCP1/PAK1/SMPD2/NPM1/BAIAP2L1/CHMP4C  
TESK1/MITF/ITGB1BP1/ARPC5L/RAC1/MIEN1/JCHAIN/CD47/CTTN/WAS/CDH17/TRMT112/VIL1/PS  
44/PPIH/TRIM59/PDCL3/PILRA/BIN1/NPC1/IRF3/RPS2/HSP90AB1/F2RL1/DYNLL1/STAT1/PABPC  
'PCNA/ITGB5/SMARCA4/PPIH/TRIM59/PDCL3/PILRA/BIN1/NPC1/IRF3/RPS2/HSP90AB1/F2RL1/I  
3/EIF5A2/TRIM28/BAX/MFGE8/NROB1/SNRPA1/ITGA5/FANCG/ZP3/SH3PXD2B/RUVBL1/MAPK3/SY1  
ASP2/BRSK1/GMNN/MIIP/PRKDC/SSNA1/MAD2L2/CNOT11/PSMD2/CENPE/PPP2R1A/NPM1/RBBP8/C  
'LAU/GIPC1/DTNBP1/ABCC4/ATAD3B/CHIT1/PSMD14/TIMP2/SYNGR1/HMOX1/DNAJC5/HSPA6/DDO5  
'HMGB2/TRIM6/JAK3/TRIM28/CCL5/MAPKAPK2/VAV1/COLEC12/CCL26/MIF/CD300A/PRDX1/HLA-I  
PN6/PSMD13/IFI16/PSMC4/MUC5B/SOCS3/COCH/UBE2D1/PSMD10/PSMD11/PSMD1/PSMA7/LRP8/1  
2/IQGAP1/PTK7/SH3PXD2B/EFNA5/SF3A2/PROM1/IL34/RGS14/HIF1A/FZD1/SERPINE1/SUCO/ATI  
'SPDL1/XRCC3/TICRR/KNTC1/GAS7/PPP1R9B/E2F8/DDIAS/CGREF1/PRMT2/E2F4/PSMB2/CBX3/PS  
I3B/HGS/SOCS1/CKS1B/HSP90AB1/NPFFR2/TGFA/TNFRSF11A/RELN/MARK2/CEP85/NCAPG2/FGFR1  
'LCP1/EFNB1/JAML/IL27RA/CD3E/TCIRG1/PAK1/SASH3/TPD52/TNFRSF4/SLC39A10/MNDA/THY1,  
'SPDL1/XRCC3/MY019/TGFA/RRS1/KNTC1/PPP1R9B/CEP85/INCENP/NDC1/FBX05/DAPK3/KIF14/I  
AB7B/RRS1/RRAS/HDAC1/CTLA4/TNFRSF11A/NBEAL2/PIR/FSTL3/CD83/BATF2/PLA2G2D/TFE3/NC  
.6A3/PLEKHA4/SIX2/HEYL/FZD2/MKKS/JAG1/WNT7B/TNC/RAC1/ITGA2/PSMB4/KDM5B/PDGF/VAI  
'2RL1/CTLA4/CD83/PLA2G2D/C1QTNF1/PRELID1/PDCD1/ZC3H12A/TNIP2/LAG3/SIRPG/NCKAP1L,  
'11A/OLR1/SLC7A8/PIP5K1C/PPIA/SLC3A2/SIRPG/NCKAP1L/ADAM8/MY01G/SLC7A10/CCL2/GYP  
27/BRCA1/THY1/CORO1C/RTN4RL2/SIRPA/NOL3/LMNA/SPDL1/XRCC3/GDI1/PRELID1/CORO1B/HII  
LL1/HMOX1/RHOC/BDKRB1/CCL5/CXCR4/SEMA4A/CCL26/PHPT1/MAP2/ITGA5/MIF/CD300A/MSN/ZI  
ZNF703/LEF1/GPI/FGFR1/ZC3H12A/NCKAP1L/FBX05/ADAM8/DAPK3/PIK3CD/CXCL13/DEFB1/LYN,  
JKZ/MAD2L2/RGS14/CHTF18/MAPK3/MAP2K2/CENPE/UBE2I/DKC1/PPP2R1A/PAK1/ACD/PEA15/NPM  
AP9/CORO1C/HSP90AB1/F2RL1/DYNLL1/ARHGEF19/CCL13/TBC1D1/RIN1/DDX11/ARHGAP39/GDI1,  
'DYN1H1/XRCC3/CAPN6/ARHGEF19/ARPC3/LIMCH1/MARK2/CEP85/CORO1B/HIP1R/PAM/DYNLT1/C  
11A/STX6/RAB3B/BIN1/SFI1/PPP6R1/MSTO1/DYNLL1/DYN1H1/SPDL1/MY019/TGFA/RRS1/PLEK1  
PNB1/SV2A/CLN3/DCTN2/LYN/ZNF593/CDK5/S100A13/FGR/AP3M2/WASF1/MAP4/SYT12/TRAPPC1  
'ITGAX/FZD1/TRIM11/PAK1/CRABP2/ADGRG1/ANKRD27/NRCAM/THY1/XRCC2/RTN4RL2/BIN1/ISL2  
3PRC5B/IL1B/ADRA2C/RNF157/PLXND1/PPP1CC/NDRG4/NAP1L2/TUBB2B/DVL2/OXTR/NSMF/GORAF  
3FNA5/SF3A2/IL34/RGS14/HIF1A/FZD1/TRIM11/ATP6AP1/PPP2R1A/PAK1/CRABP2/ADGRG1/ANKI  
3DKRB1/BAX/DNAJC5/NUTF2/PHPT1/MAP2/FKBP1A/CD300A/MTCL1/MSN/BRSK1/PKDC/IIQGAP1/C/  
MGB2/YBX3/JAK3/CHMP4B/HMOX1/ATAD3A/CACYBP/CCL5/BAX/DNAJC5/ITGA5/MIF/BEX3/CASP2/I  
JLP1/FCHSD1/CORO1C/STX6/BMF/NOL3/HGS/BIN1/NPC1/PPP6R1/LMNA/F2RL1/ARPC2/RAB7B/TGI

ME3/HSPBP1/TNIP2/UBE2J2/NPEPPS/OTUB1/DTX2/FBX05/GTPBP4/PRR7/TRIM31/ANAPC7/SPSB1  
3/LZTS2/E2F4/TMEM237/BRIX1/RRP7A/SNX10/CEP89/CCNO/UNC119B/GPSM2/EHD1/HAUS1/ACTG1  
14/TRAM1L1/RPSA/RANGRF/YWHAH/BBC3/PMAIP1/ITGB1BP1/REEP2/RPS5/EHD2/ACTB/RAP2A/CD4  
4FRSF11A/DDIAS/NUP93/DDX11/HYOU1/NUP205/NUP37/NDC1/NUP188/ZC3H12A/BID/BCAP31/DVI  
3/LCP1/MAP1S/TPM3/PAK1/BAIAP2L1/FCHSD1/RHOF/ITGB5/CORO1C/BIN1/CORO7/HSP90AB1/F2H  
3N/ZP3/NINJ2/HLA-DPB1/SRPX2/AMIGO2/EFNA5/CD2/EBI3/MAD2L2/ITGAX/CD276/EFNB1/JAML/  
RAP2A/CTTN/WAS/POC1A/NUP85/HAUS8/TNIK/PLK4/PFN1/MAP4/IFT80/GORAB/ODF2/PTPN23/T  
33/CORO1B/FGFR1/MT3/DYNLT1/DVL3/VLDLR/HDAC2/RAP1GAP2/YWHAH/CAMSAP2/TBC1D30/KDM1/  
PPP1R9B/E2F8/CSNK1E/PRMT2/E2F4/PSMB2/PSME3/BID/HAUS1/BLM/FBX05/DBF4/TUBB4A/CNO1  
ARHGFE2/DSCC1/NCAPH/MCM10/REEP4/SMARCD3/MCM7/HRAS/PLCB1/USH1C/KIF11/MCM3/NUP62/  
PSMA7/PSMB3/DROSHA/KAT2A/IL4R/PNP/PSMD4/PSMD3/PSMD7/LILRB4/AP3D1/AXL/FADD/BTK/  
AP31/UBE2J2/DVL3/GPSM2/FERMT1/NPEPPS/LEPROTL1/RANGRF/YWHAH/HCLS1/BBC3/KDM1A/PM  
RB1/CCL5/CXCR4/SEMA4A/CCL26/PHPT1/ITGA5/MIF/CD300A/MSN/ZP3/IQGAP1/SRPX2/MIIP/CAI  
GPI/FGFR1/ZC3H12A/NCKAP1L/FBX05/ADAM8/DAPK3/PIK3CD/CXCL13/DEFB1/LYN/ITGB1BP1/R  
38A/WTAP/HNRNPU/HTATSF1/LSM8/MAGOH/RBMX/ZRSR2/HNRNPA1/PIIE/POLR2I/POLR2J/HNRNPL/  
38A/WTAP/HNRNPU/HTATSF1/LSM8/MAGOH/RBMX/ZRSR2/HNRNPA1/PIIE/POLR2I/POLR2J/HNRNPL/  
38A/WTAP/HNRNPU/HTATSF1/LSM8/MAGOH/RBMX/ZRSR2/HNRNPA1/PIIE/POLR2I/POLR2J/HNRNPL/  
PSMD3/RBX1/CARD16/PSMD7/ANGPT2/TBL2/PLEKHN1/LONP1/SUV39H2/PSMD8/VHL/PSMA1/PSMB5/  
K3/STK11IP/RNASET2/FPR1/MNDA/PTGES2/RAP2B/GYG1/ARHGAP9/RHOF/SIRPA/DEGS1/SPON2/I  
11/ZC3H12A/TNIP2/LAG3/SIRPG/NCKAP1L/ADAM8/CCL2/PLSCR1/FANCA/HSPH1/CD209/LYN/CARI  
H2B2/IRF7/ZC3H12A/PSME3/TNIP2/FLOT1/ACTG1/NCKAP1L/SMPDL3B/HLA-DQA2/MYO1G/SHC1/I  
G/RBM17/HNRNPM/SLBP/KHDRBS1/HNRNPA3/PRPF31/ZMAT5/SUPT5H/SNRPB2/PRPF19/CHTOP/SAI  
3/RPS15/NOL6/LTV1/MAVS/SARNP/MAGOH/RITA1/HIKESHI/ZPR1/THOC2/XPO7/HNRNPA1/UBR5/E  
3/LCK/PTPN6/CD27/IL12RB1/IL15/RPS3/GRB2/CD6/STK10/CDC42/IL4R/SEMA4D/PNP/LILRB4/I  
324/DYNLT1/GPSM2/CYTH2/FLOT1/ARHGAP1/RABIF/RTKN/SHC1/RANGRF/RAP1GAP2/CDK2/SIPA1I  
GCN1/RAE1/CDC123/EIF4A3/PSMD1/ILF3/PSMA7/GRB7/ZNF706/XPO5/EXOSC5/YWHAB/RPS3/SRI  
MD11/CDKN2C/PSMD1/DONSON/PSMA7/TFAP4/RBBP4/PSMB3/KAT2A/ZNF207/CBX5/CALR/TOPBP1/  
RRX1/ZMYND8/SEMA4D/SYT1/DNM1L/SYT3/SEMA4F/KATNB1/SEMA5B/STK25/ABI2/ARHGDIA/VIM/  
2/ADAM12/LOXL2/TGFB2/ADAM19/ADAMTS9/CCDC80/BGN/COL6A2/ER01A/LOX/IBSP/VWA1/LUM/C  
./FBX05/ADAM8/DAPK3/PIK3CD/CXCL13/LYN/ITGB1BP1/RAC1/ITGA2/PLA2G7/MIEN1/IL1B/BCAI  
N4/VAMP8/MRPS17/MRPS21/MRPS15/CCSAP/MRPL18/MAP1A/JMJD4/ADD3/LIMA1/ETF1/TECPR1/M  
4/CCT8/GNL3/MAPT/ZNF335/CHTOP/NAT10/NBN/MTHFR/HNRNPU/ERCC1/VEGFA/EXOSC10/SREBF1  
DH17/VIL1/PSMC4/PFN1/WASF1/INPP5J/PARP1/PIEZ01/RPS3/CAPZB/GRB2/CDC42/VPS18/ARH  
63/DOK3/STK11IP/RNASET2/FPR1/MNDA/PTGES2/RAP2B/GYG1/ARHGAP9/RHOF/SIRPA/DEGS1/H  
2/RAP2B/GYG1/ARHGAP9/RHOF/SIRPA/DEGS1/HK3/CCT2/CD58/C3AR1/HSP90AB1/PRSS3/DYNLL1/  
INN/MIIP/PRKDC/SSNA1/MAD2L2/CNOT11/PSMD2/CENPE/PPP2R1A/RBBP8/CHMP4C/BRCA1/RBL1/T  
T/PLK4/ANAPC11/PSMD10/ZBTB17/CCND2/TFAP4/USP22/CDC42/CALR/RANBP1/APP/MED25/GDPI  
)/SYMPK/CPSF3/RPS15/NOL6/LTV1/MAVS/SARNP/MAGOH/RITA1/HIKESHI/ZPR1/THOC2/XPO7/HNI  
HMP4B/RHOC/ESPL1/FAM83D/CCDC124/SGO2/CLTA/RUVBL1/MAD2L2/RGS14/CENPE/UBE2I/NUDC/  
11C/DUSP4/IL1B/GBA/ACTB/CHORDC1/PDGFA/MLKL/MAPK11/PTPN6/MAP3K14/TNIK/DVL2/MST1R/  
IIP1R/PSME3/SLC9A3R1/BID/BCAP31/BCL3/TNFRSF10C/FGFR3/NOC2L/PRR7/NONO/DAPK3/ATF4/  
2/ARHGAP18/TGFB3/APP/SWAP70/CDC42EP2/KATNB1/GMFG/ABI2/WDR1/CLIP3/DRG1/MAPT/CKAP2  
1/PSMD9/WTAP/RPS27A/HNRNPU/EXOSC9/MAGOH/CDK11B/EXOSC7/TBRG4/UBA52/NANOS1/RBMX/H  
AG3/PRKCI/GZMB/PDCD5/STX4/RACK1/CEP250/CCT8/GNL3/CLIP3/MAPT/CEMIP/EMD/WRAP53/MFI  
M1/BCL2L1/RILPL1/RAB11A/ZDHHC23/TSPAN14/RAB29/GOLPH3L/CACNB3/PACSIN1/GORASP2/II  
V/RRS1/KNTC1/PPP1R9B/CEP85/INCENP/NDC1/FBX05/DAPK3/KIF14/KPNB1/SMC4/FANCA/KNSTR  
B10/FGR/LCP2/PSMA5/NRAS/WAS/LCK/PTPN6/PSMD13/PSMC4/MUC5B/CD79A/PSMD10/PSMD11/P  
302/RPL35/RPS20/PSMD4/RPL18A/PSMD3/PABPC4/PSMD7/RPS19/NT5C3B/RPLP0/RPL18/RPL23/V  
RPL23/VIM/TRIM71/PLEKHN1/RPL38/HNRNPM/RPL23A/EXOSC3/BTG2/PSMD8/GSPT2/PSMA1/RPS7/  
L/BCAR1/CD47/CTTN/MYADM/WAS/VIL1/CIT/PFN1/WASF1/NEB/KPTN/TACSTD2/CAPZB/GRB2/FHOI  
BAG3/ARRB2/KAT2A/ZNF207/MTF2/SWAP70/DNM1L/RAD21/KATNB1/GMFG/MTBP/NME6/CLIP3/MAI

CL28/CARD11/RAC1/CBFB/IL1B/IL2RA/CD47/TNFSF13B/MYADM/ADAM19/LCK/PTPN6/CD27/IL12  
DIA/SCN1B/MAPT/BRK1/AKIRIN1/CBFA2T2/STMN2/RASAL1/PALM/ARAP1/DBNL/PLXNC1/DNM2/S  
WASF1/NEB/CAPZB/SEMA4B/GRB2/ARHGAP18/SLC12A7/SEMA4D/SWAP70/CDC42EP2/PPP1R15A/SI  
RT1/NOP10/KRI1/FAM98B/RPS7/RPL7A/WDR55/GAR1/SEN3/GTPBP3/RPS15/ADAT3/RPS16/PUS  
D4/DNM1L/PSMD3/RBX1/CARD16/PSMD7/CBL/ANGPT2/TBL2/PLEKHN1/LONP1/SUV39H2/PSMD8/VI  
4/TRAFF3/SYDE1/POLR2L/AGO2/CALR/APOBEC3D/POLR2K/GPATCH3/CARD16/PRDX4/CLEC7A/TNII  
B4/AP3D1/AXL/FADD/BTK/PELI1/STX4/CLEC7A/RASAL3/GPR183/LBP/EXOSC3/BTN2A2/CCL3/ZI  
3AM1/GZMA/OGG1/RPA2/CCT8/GNL3/PPP4C/TIMELESS/EXOSC3/DBF4B/ESCO2/PTGES3/NAT10/DN  
11/RAC1/CBFB/IL1B/IL2RA/CD47/NFAM1/TNFSF13B/LCK/PTPN6/CD27/SAMSN1/IL12RB1/CYP26  
ALCA/PML/DRAM2/PARP1/LOX/POLE4/POLA1/CROCC/BARD1/BAG3/PRIM2/XRCC6/TMEM119/TELO2/  
1/MB/PSMA7/PSMB3/TGFB3/PSMD4/DNM1L/PSMD3/RBX1/CARD16/PSMD7/CBL/ANGPT2/TMEM199/  
RPL7A/RPS23/RPS10/BAD/HSP90AA1/RPS15/SGTA/RPS16/SYS1/VPS35/CASP8/RPL5/RPS27A/ARI  
E/PRMT2/E2F4/PSMB2/PSME3/BID/HAUS1/BLM/FBXO5/TUBB4A/CNOT9/CDKN2B/CCL2/CSNK1D/A  
./PARP1/PSMD10/LTBR/GPX1/TNFSF12/YWHAQ/YWHAB/RPS3/TFAP4/FAIM/ARRB2/PCGF2/GZMB/D  
FADD/BTK/PELI1/STX4/CLEC7A/RASAL3/GPR183/LBP/EXOSC3/BTN2A2/CCL3/ZNF335/HSPD1/S  
/SLBP/DBF4B/SSBP1/ACHE/ESCO2/DNA2/EME2/CHEK2/CLSPN/RAD1/CDK2AP1/NBN/CCNE2/GLI1/  
4/KNSTRN/AKAP8L/NCAPH2/CDCA2/SFPQ/BANF1/CENPK/NUP43/DYNC1LI1/DSN1/ANAPC11/TUBG  
/CDKN2C/PSMD1/DONSON/TIPIN/MSH2/PSMA7/PSMB3/ZNF207/TOPBP1/PSMD4/PSMD3/RBX1/PSMI  
KAT2A/IL4R/PNP/LILRB4/AP3D1/FADD/PELI1/RASAL3/BTN2A2/HSPD1/ABL1/SART1/HLA-DOA/I  
ARPC5/ABL1/TBCD/STMN2/ACTR3/DBNL/HSP90AA1/SPIRE1/DCTN1/VDAC2/MAP7D3/ADD3/EML2/M  
ABL1/FCGR2B/CCND3/VCAM1/TWSG1  
S10/SEN3/RPS15/RPS16/RPL5/NOL6/RPF2/BMT2/POP5/NVL/LTV1/RPL6/EXOSC9/EXOSC10/PA  
/SWAP70/TRPM4/CCRL2/RPS19/GPR183/LBP/CCL3/S100A7/CXCL17/AKIRIN1/CYP19A1/BIN2/V  
L3/GPR183/WNT4/BTN2A2/ZNF335/HSPD1/ABL1/FCGR2B/TNFAIP3/CCND3/VCAM1/TWSG1  
ADD/PELI1/RASAL3/BTN2A2/HSPD1/SART1/FCGR2B/CSK/BAD/BCL10/VCAM1/TWSG1/PTPN2

/HDAC10/NBN/MAGEF1/ERCC1/TSN/RBM14/TEX11/ACTR5/RNF8/RPA1/UBE2N/MMS19/MUS81/MSH6/  
AB27B/TNP01/IFT22/SNAPIN/SSX2IP/UXT/HTT/CCDC65/ACTR1A/OFD1/KLC1/RAB1A/CCDC40/K  
5A/SLC35C2/POLR2D/DHX9/NXT2/RBM15B/SEH1L/EIF6/KHSRP/THOC1/DHX38/ENY2/PABPN1/SR  
2/POP5/NVL/EXOSC9/EXOSC10/EXOSC7/DDX56/PIH1D1/UTP20/EXOSC1/NOB1/NSUN4/DDX10/WDI  
/MORC2/MIR155HG/HDAC5/METTL3/PPARG/MOV10/PPP1R8/ADAR/AAAS/SETDB1/AGO1/MBD2/POLI  
5A/EXOC3/IFT20/POLR2D/AP2B1/TNP01/IFT22/SNAPIN/RBM15B/SSX2IP/SEH1L/EIF6/ATR/THOC  
IOC1/DCLRE1C/INPP5D/HDAC5/PTPRC/IKZF3/CD180/CASP3/CD22/UNG/FZD9/SUPT6H/DOCK11/CI  
N2/PSMD3/RBX1/PSMD7/RAD21/BABAM1/CEP250/HAUS6/NAE1/NDE1/KHDRBS1/CKAP5/DBF4B/RAI  
/ZNF335/HSPD1/SART1/TOX/CSK/BAD/BCL10/VCAM1/PAK2/HLA-F/NKAP/RHOA/CD38/AP3B1/TNFI  
ATC4/PDCD10/CHEK2/BAD/ERP29/PTPN2/STYXL1/PTPN1/NBN/PIAS4/VDAC2/PTPMT1/TMEM109/T  
J/BRK1/ARPC5/ABL1/FCGR2B/CSK/ACTR3/BIN2/HSP90AA1/DNM2/TUSC2/PTK2/THBS1

KIF20B/PPP2R5B/CDK5R1/APBB1/INHA/PRKAG1/FAP/CNOT10/WDR6/EIF4G2/NOTCH2/CNOT3/TFI  
CAPZB/CALR/PSMD4/PSMD3/CTSD/PSMD7/CD8A/AP3D1/IKBKG/AP1B1/SEC13/PSMD8/HLA-DOA/FC  
IF3E/NSUN4/RPL13A/POLR2D/SART3/TGS1/MTERF3/MRPL11/DHX9/USP39/LUC7L/EIF6/STRAP/  
3/CDK5R1/PSMC3/TWIST1/SRF/RHOA/GTF2H1/NIN/PSMC5/FAF1/RPA1/ARF1/RHOBTB2/GMFB/ATR/  
D1/SUSD2/CHEK2/CCND3/ACVR1B/ADAM17/CDK2AP2/PLK3/CCNE2/GLI1/ZPR1/GPR132/CRLF3/A  
CGR2B/CCND3/VCAM1/TWSG1

ICSTN/MFHAS1/RPS24/HOXB6/ANKRD54/PDE4B/DMTN/DYRK3/ANXA1/CCR2/DOCK11/ERCC2/VPS54/  
3CL10/PSMA4/SPPL3/PSMD9/PTPN2/PAK2/RAB29/CACNB3/PSMC3/STOML2/CD79B/CD38/PSMC5/UI

/RPS7/CHEK2/RAD1/PRKAA2/CSNK2A1/RPL5/MBD3/NBN/RPF2/PLK3/PAK1IP1/TMEM109/MYO6/CSI  
T4/DBF4B/RAD51C/BTG2/PIDD1/HSPA2/MTA3/NSFL1C/CHEK2/CCND3/CSPP1/ADAM17/PLK3/HNR1  
CENPK/DYNC1LI1/DSN1/ANAPC11/TUBG2/KLHDC8B/KIF2A/ZNF207/CHMP1A/RANBP1/RAD21/KAT  
2/PSMC3/TWIST1/RHOA/CLTC/SIX1/AP2B1/PSMC5/RBPJ

3/ACVR1B/ADAM17/CDK2AP2/PLK3/CCNE2/ZPR1/GPR132/CRLF3/PPAT/HINFP/CNOT10/POLE3/RI



21/CEP250/HAUS6/NAE1/NDE1/KHDRBS1/CKAP5/DBF4B/RAD51C/PSMD8/HSPA2/PKIA/PSMA1/MTA3  
 1C/SPIRE2/NCKAP1/PPP1R9A  
 RPL37A/RPLP1/DHX9/IFITM3/RPL32/RPL30/SEH1L/NELFA/POLR2E/RPS9/EIF3G/SUPT4H1/HMG2  
 3/SMG7/LRPPRC/POLDIP3/THOC7/AAAS/THOC3/HNRNPA2B1/SUPT6H/U2AF1L4/SRSF3/PNPT1/NUP2  
 3/SMG7/LRPPRC/POLDIP3/THOC7/AAAS/THOC3/HNRNPA2B1/SUPT6H/U2AF1L4/SRSF3/PNPT1/NUP2  
 HD1L/HAT1/DQX1/RPS27A/NBN/RAD18/MIS18A/UBA52/NCAPD3/DAXX/ACTR5/RFC5/RNF8/SART3/  
 IX/ZRSR2/EIF3E/NSUN4/RPL13A/POLR2D/SART3/TGS1/MTERF3/MRPL11/DHX9/USP39/LUC7L/EIF  
 1A1/ARHGAP28/PPM1F/DSTN/PLEKHH2/RHOA/MTPN/SPTAN1/CORO2B/ARF1/RHOBTB2/GMFB/HAX1/I  
 WD3/RPA2/NAE1/BTN2A2/BTG2/PSMD8/PIDD1/SUSD2/PSMA1/CHEK2/CLSPN/PSMB5/PSMA4/PSMD9  
 RDX5/PPM1F/NDUFA13/RHOA/IFI6/ANP32B/LGMN  
 C2/XPO7/HNRNPA1/EIF5A/POLR2D/DHX9/NXT2/MEX3D/RBM15B/SEH1L/EIF6/KHSRP/ATR/THOC1/  
 1A/CD3G/LLGL2/CYTH3  
 2A2/BTG2/PSMD8/PIDD1/PSMA1/CHEK2/CLSPN/PSMB5/PSMA4/PSMD9/CDK2AP2/NBN/PLK3/ZFYVI  
 19/UIMC1/BCL2L1/INTS7/CHFR/HINFP/TIPRL/CNOT10/CCAR2/CNOT3/MUS81/TFDP1/ATR/TP53I  
 10/CNOT3/LSM1/RPS9/RPS14/RPS27/EXOSC2/RPL29/CASC3/RPL13/RBM8A/MAGOHB/RPL4/RPL41/  
 RSL1D1/DIMT1/EBNA1BP2/NOL9/UTP23/RPP30/SUV39H1/PELP1/RPS9/WDR46/IMP4/RBFA/RPS14/  
 C37/MLEC/PIIE/PIIB/GAK/PDCL/DNAJC2/DNAJC4/HSP90B1/PDIA3/HSPA13/DNAJC1/CSNK2A2/5  
 7/CIB1/RPL29/ZDHHC24/SRP68/TRAM1/C2CD5/RPL13/SSR1/MYO1C/RAB8B/RPL4/RPL41/RPL9/RI  
 1/ARF1/RHOBTB2/GMFB/HAX1/CAMSAP1/PREX1/ARFGEF1/ADD1/MYO1C/SPIRE2/NCKAP1/PPP1R9/  
 4H1/HMGA2/PARP10/MORC2/NELFCD/GTF2F1/ZC3HAV1/LARP1/VPS4A/NECTIN2/CTDP1/SRPK2/II  
 LE3/RPA1/TBP/IPO4/SRCAP/GRWD1/ERCC3/TAF1B/PAF1/DDB1/GTF2A2/NAA60/CAND1/MYC/CENI  
 HSPA2/PKIA/PSMA1/MTA3/CLSPN/CEP41/PSMB5/PSMA4/HSP90AA1/PSMD9/DCTN1/CEP164/HAUS7  
 81/MORF4L1/TP53BP1/HMGA2/DCLRE1C/CIB1/MMS22L  
 IOC3/HNRNPA2B1/SUPT6H/U2AF1L4/SRSF3/PTPN14/NUP214/TSC1/TP53/STRADA/IWS1  
 .SPN/CEP41/PSMB5/PSMA4/HSP90AA1/PSMD9/DCTN1/CEP164/HAUS7/NBN/ZFYVE19/HAUS5/DYNC1  
 DK5R1/RBM14/RHOA/CLTC  
 P5D/DUSP22/CD3G/PTPRC/NECTIN2/BTN2A1/PIK3CB/PSMB1/PLCG1/EIF2B4/MAP3K7/NFKBID/P5  
 3/SMG7/POLDIP3/THOC7/RBM22/AAAS/PARK7/EGR2/THOC3/HNRNPA2B1/SUPT6H/U2AF1L4/SRSF3/  
 MYO1C/SMG7/LRPPRC/POLDIP3/THOC7/AAAS/THOC3/TERF1/HNRNPA2B1/SUPT6H/U2AF1L4/SRSF3/  
 11F/DSTN/RHOA  
 L3/HNRNPA0/PSMB1/MOV10/PSMB6/GTPBP1/HNRNPD/PSMA3/DCP2/HNRNPC/FXR1/SYNCRIP/EIF4C  
 RPS27/RPL29/EIF2D/LARP1/YTHDF2/YTHDF1/RPL13/METTLL3/RPL4/RPL41/RPL9/RPS6/EIF2B4/I  
 13/PSMD8/HLA-DOA/FCGR2B/PSMA1/VAMP8/PSMB5/PSMA4/PSMD9/DNM2/DCTN1/CANX/HLA-F/AP2/  
 3G/MMS19/ATR/TP53BP1/ATAD5/MORC2

5/PSMA4/PSMD9/DNM2/DCTN1/CANX/HLA-F/AP2A2/DYNC1I2/KIF22/PSMC3/CLTC/TAPBP/AP1S1/

3/PSMB5/PSMA4/PSMD9/DNM2/DCTN1/CANX/HLA-F/AP2A2/DYNC1I2/KIF22/PSMC3/AP3B1/CLTC/  
TR1A/OFD1/TMEM67/CEP72/RAB8B/C2CD3/CNTRL/TSNARE1/VAMP3/RAB3C/CEP97/RAB3IP/NPHP1

/IFT140/BICD2/RAB6A/NEFH/RASGRP1/FEZ1/NEFL

/PSMB6/PLA2G6/PSMA3/RELA/PSMB7/SKP1/PIK3R2/VAV3/APPL2/ACTR2/IKBKB/FCGR1B/NCKIPSI

MB6/HNRNPD/PSMA3/DCP2/HNRNPC/FXR1/SYNCRIP/EIF4G1/PSMB7/ELAVL1/FASTKD1/SERBP1/N

MT5/ING2/HUS1/PRMT6/BRD7/DYRK3

/OGT/ZBTB7B

L30/SEH1L/NELFA/POLR2E/RPS9/SUPT4H1/HMGA2/NELFCD/RPS14/GTF2F1/RPS27/RPL29/CTDP1  
PIN1/FZD9/WNK1/SMAD3/ADGRA2/WNT5A/PSMD12/SMURF2/WNT3A/ROR2/GID8/DACT1/PSME2/JUI  
4/IFNG/NOD1/TRIM15/RAB7A/PDE5A/TSG101/TAF11/C1QBP/RAD23A/SP1/POMZP3/SMURF2

AB8B/C2CD3/CNTRL/TSNARE1/VAMP3/RAB3C/CEP97/RAB3IP/NPHP1/VPS33B/HAUS2

/HYAL2/HTRA2

CP2/HNRNPC/FXR1/SYNCRIP/EIF4G1/PSMB7/ELAVL1/FASTKD1/SERBP1/NUP214/TNFSF13/PAIP1

IC5

3/DDX1/MIB2/MTDH/CASP10/TICAM1/CD40

IF7/MCM3AP/NUP50

JRF2/NFATC1/ROR2

7/RPS28/RPS17/RPL22/RPS15A/CHMP4A/RER1/SRP72/RPL31

7/PPP2CA/RPL22/RPS15A/SMG8/PARN/RPL31/PNRC2/GSPT1/SKIV2L/DCP1A







L/STMN3/MAPK11/NRAS/WAS/TGFB2/RASSF1/RASA3/RAB10/WASF1/ABR/CADM4/CDC42SE1/FGD6/IRX9H2/ZNF335/TAF12/CHTOP/TAF10/DOT1L/MTA3/PRKAA2/HDAC10/HAT1/MBD3/USP21/MTHFR/RNIBAP30/AGFG1/ABR/SBF1/SIPA1L3/CDC42SE1/FGD6/ARRB2/SYDE1/RUNDC1/LLGL1/ARHGAP18/RANPPI1/RAP2B/THY1/CORO1C/UBASH3B/HGS/SOCS1/CKS1B/HSP90AB1/NPFFR2/TGFA/TNFRSF11A/RIIRL2/BIN1/ISL2/HDAC1/RELN/CSNK1E/ZSWIM5/MARK2/GDI1/EPHB3/NUMBL/FGFR1/MT3/DYNLT1/SMF/LRP8/SRRT/FAIM/PRKCI/ZMYND8/SEMA4D/SYT1/DNM1L/SYT3/GDPD5/KATNB1/STK25/ARHGD1TRIM6/JAK3/HMOX1/WASF2/CCL5/BAX/CD86/MAPKAPK2/VAV1/COLEC12/PHPT1/MIF/FKBP1A/CD30E8/DBF4/FGFR3/ADAM8/PAK4/VLDLR/SHC1/KIF14/AXIN1/SLC11A1/LYN/WNT7B/ITGB1BP1/BIRC7/EXT1/VCP/DHDDS/ACOT8/B4GALNT2/NECAB3/DAD1/POFUT2/FUT8/GALNT7/ALG1/LARGE2/GXYL1/3K10/DGKQ/CDK5R1/PPM1F/NEK6/ATP2B4/MAPKAPK5/HPF1/SBK1/PDK3/OSM/HAX1/MAP4K1/CAV1/IRRB2/MUC20/TLR5/PSMD4/XRCC6/GPATCH3/PSMD3/PSMD7/RPS19/IKBKG/FADD/BTK/PELI1/CLEC732/APP/MED25/ANKRD33/CARD16/HEY1/GZMA/ZNF675/RALB/MSX1/STPG1/PTPRF/CARD18/MFNG/1

1/TNIP1/LBP/HSPD1/PSMD8/PSMA1/TNFAIP3/MAPKAPK3/PSMB5/BCL10/PSMA4/PSMD9/CASP8/RP5JF216/BAD/MAVS/IRF5/DMBT1/BNIP3L/OAS3/IVNS1ABP/BCL2L1/IFNAR2/TARBP2/AP1S1/IFI6/1LTC/STXBP1/GAK  
33HAV1/LARP1/VPS4A/NECTIN2/CTDP1/SRPK2/IFITM2/DDB1/P4HB/MX1/TRIM32/VAPA/TBC1D20/RYO1C/TBC1D20/EFCAB7/RBM22/USP36/KIF5B/HYAL2/HTRA2/IFNG/ARIH2/TRIM46/PIK3R2/UBL5

1/SUV39H1/PDK3/ATG7/CAV1/ATP7A

'IFT140/CNTROB/CEP135



l/TNIIK/FGFR2/DVL2/PFN1/IFT80/AP2S1/MST1R/RNF220/ATP6VOC/PSMD10/PSMD11/PSMD1/PSM/  
7/UBE2E1/FBXL6/USP1/DNAJC10/PSMB3/UBE2A/SMARCC1/ARRB2/USP22/KCTD2/VPS25/PSMD4/P  
12/KCTD10/CTSS/WFS1/UBE2L3/PSMB8/RNF187/PSMB10/PSMA5/DNAJB2/TAF9/POMT2/PSMD13/P  
'GRPEL2/GZMB/NDUFS6/DNM1L/UQCC2/TIMM44/PDCD5/TOMM40L/STPG1/TIMM50/ROMO1/LETM1/M  
01/CDC42/ARHGAP18/TGFB3/SWAP70/CDC42EP2/GMFG/ABI2/ARHGDIA/WDR1/SEMA3E/ARPC1A/WN  
2RA/CD47/SPOCK2/TNFSF13B/MYADM/PLEKHA2/TGFB2/ADAM19/LCK/PTPN6/CD27/IL12RB1/CCDC  
1PKAPK5/SBK1/PDK3/OSM/HAX1/MAP4K1/CAV1/ATR/HMGA2/RPTOR/MKNK1/PKD1/CSNK2A2/VRK2/I  
'PSMB5/BCL10/PSMA4/PSMD9/CASP8/RPS27A/DMBT1/PAK2/TLR2/MUC6/UBA52/MUC15/PSMC3/UBI  
H2/PIK3R6/HAX1/INPP5D/ZNF683/PTPRC/IKZF3/METTL3/LOXL3/ACIN1/NFKBID/CLPTM1/SH3R  
3/CD3G/PTPRC/CLEC4E/METTL3/LOXL3/RPS6/NFKBID/CHD7/CLPTM1/SH3RF1/IRF4/RHOH/CD4/H  
MRPS24/MRPL33/VPS4A/MRPS5/ADD1/MRPL36/MRPL14/OGFOD1/MRPL3/CAPZA2/ERAL1/AURKAIP1,  
1/CTNNBIP1/MALT1/CD101/HLA-G/GATA3/MED1/NUDT21/FLT3LG/IL1RL2  
'XIAP/YAP1/LRRK1/PRDM15/PSMD5

PS21/MRPL12/RPL7/EIF3I/RPL28/MRPS34/TRMT112/EIF2S3/GSK3A/DENR/RPL39/RPL35A/FAR5/ RNF26/UBE2L3/PSMB8/RNF187/RNF157/PSMB10/PSMA5/DNAJB2/ASB6/PSMD13/PSMC4/GSK3A/FI7/UBE2E1/FBXL6/USP1/DNAJC10/PSMB3/UBE2A/SMARCC1/ARRB2/USP22/KCTD2/VPS25/PSMD4/PS2/OMT2/PSMD13/PSMC4/GSK3A/OSBPL7/PML/ANAPC11/VPS28/UBE2D1/USP14/PSMD10/PSMD11/PSM1/TNIK/FGFR2/DVL2/PFN1/IFT80/AP2S1/MST1R/RNF220/ATP6V0C/PSMD10/PSMD11/PSMD1/PTP11/YC1/FUT4/B3GNT9/HK3/SLC51B/NPC1/GALNT18/B3GNT7/TPI1/FOXK2/GFPT2/CAD/AMPD3/FMOD/ VAV1/CXCR4/CCL26/TRAF5/MIF/FKBP1A/CD300A/GPR35/CANT1/IQGAP1/CARD10/SLC9A1/RRAG1/JAGPA/CSPG5/TNIP1/CHST12/HPSE/CSPG4/SGSH/MFNG/COL11A1/FUT1/LFNG/EXT1/VCP/DHDDS/IT/NEP1/VPS25/FHDC1/DMPK/AP3D1/STK25/VRK1/EPB41L3/BNIP1/VMP1/ANKLE2/EMD/NSFL1C/PDC5A/TNIP1/TRIM25/SEC13/VCP/SRPK1/VAMP8/NOTCH1/RPS27A/MAVS/CTBP2/HTATSF1/OAS3/TRIM-DOA/FCGR2B/TOX/BAD/PTGER4/VCAM1/TUSC2/PTPN2/ADAM17/TMEM98/NKAP/ADGRG3/CD79B/SRI147/PSMB8/PSMB10/PSMA5/CD300LF/NRAS/GPSM3/SFPQ/PQBP1/PSMD13/IFI16/PSMC4/MUC5B/CCL2/DCTN1/NOTCH1/CEP164/ODF2L/HAUS7/VDAC3/MARK4/HAUS5/RILPL1/DYNC1I2/RAB11A/NEDD1/GABRB3/HSPA5/BCL2L1/EGLN2/RILPL1/HLA-F/ZPR1/RAB29/MECP2/CDK5R1/DAXX/RHOA/STXBP1/SF1/NEB/TACSTD2/CAPZB/GRB2/FHOD1/CNN2/CDC42/ARHGAP18/TGFB3/SWAP70/CDC42EP2/TRPM4/DCTN1/NOTCH1/CEP164/ODF2L/HAUS7/VDAC3/MARK4/HAUS5/RILPL1/DYNC1I2/RAB11A/NEDD1

ID7/IKBKG/RACK1/ZNF675/CLIP3/CCL3/PELI3/PSMD8/LIMS1/PSMA1/TNFAIP3/TRADD/PSMB5/PS10A/NEK6/CXXC5/UBE2N/CCL19/TLR7/IRAK2/DAB2IP/TMEM106A/LITAF/NFKBIL1/TLR8/LPAR1/M

PRD2/CLP1/NUDT21/INTS5/SAGE1/NCBP1/SUPV3L1

1/FBXL6/USP1/DNAJC10/PSMB3/UBE2A/SMARCC1/ARRB2/USP22/KCTD2/VPS25/PSMD4/PSMD3/RI  
3AP2L/FSTL3/NDC1/CCT4/BCAP31/FBX05/JAG2/SPAG1/RSPH1/SCMH1/HDAC2/MKKS/ZFP41/DEFB1  
'TTLL1/EIF2S2/DYNLL1/DPCD/FSTL3/PPARD/LDOC1/NDC1/PAM/BCAP31/KISS1/FBX05/JAG2/RSI  
'TTLL1/EIF2S2/DYNLL1/DPCD/FSTL3/PPARD/LDOC1/NDC1/PAM/BCAP31/KISS1/FBX05/JAG2/RSI  
HR/VPS18/SYT1/SNX12/DNM1L/PDCD5/CSPG5/KHDRBS1/CEMIP/PKIA/EMD/MFF/PDCD10/VAMP8/WV

3S1/PTPN1/RPS27A/VEGFA/PLA2G1B/UBA52/DUSP7/MAP3K10/TPD52L1/DAXX/RAPGEF1/PIK3R5/M

9/PSMA1/SFRP2/PSMB5/PSMA4/PSMD9/VPS35/NOTCH1/SFRP4/BCL9L/TMEM64/GLI1/MESP1/SULF2

3/TCP1/FGR/MAPK11/TGFB2/CASP1/GSK3A/VPS28/OXCT1/PTPN23/YWHAQ/YWHAB/GSDMD/ACSL3/I

2/CDK5R1/DAXX/RHOA/STXBP1/SIX1/AP2B1/LGMN/TIGAR/CDC34/GCLM/CRLF1/ATG7

164/GLI1/MESP1/SULF2/UBR5/PSMC3/STK3/GSKIP/RAPGEF1/IFT20/PSMC5/RBPJ/CCAR2/NPHP4,

3IM32/NFKBID/VAPA/ATP2C1/CC2D1A/RHOH/SHISA5/TRIM62/CD4/BRD4/RELA/TFG/NOD1/PRKCB,

3CAM1/TRIM32/VAPA/THOC7/TRIM27/KPNA4/THOC3/TRIM62/CD4/WWP2/HYAL2/CTSB

92/PIN1

140/CNTROB/CEP135

ACVR1/ABL1/SFRP2/CSK/PTK2/PTPN2/ADAM17/TNK2/PTPN1/VEGFA/PAK2/LMTK2/DGKQ/PPP2R5B,  
I/NF2/ACVR1/ABL1/SFRP2/CSK/PTK2/PTPN2/ADAM17/TNK2/PTPN1/VEGFA/PAK2/LMTK2/DGKQ/PI  
I/PSMD3/CARD16/PSMD7/IKBKG/RACK1/ZNF675/IGBP1/CLIP3/CCL3/PELI3/PSMD8/LIMS1/PSMA1

38/THUMPD3/QTRT2/DUS3L/TARBP1/TRMT10C/ANKRD16/AIMP1/CDKAL1/GTF3C4/TRIT1/ADAT2/EI

'1/CARD10/EFNA5/SH2D3A/IL34/DGKZ/LEFTY1/MAD2L2/HIF1A/MAPK3/NUPR1/FZD1/P2RY6/CD3E  
./DNM1L/PGAM5/RACK1/ARHGDIA/RIC8A/RGS3/TBC1D10C/RASAL3/WNT4/TBC1D22A/CCL3/CHN1/I  
15/ZMIZ1/POLE3/RBM15B/ELOF1/TBP/CTBP1/SEH1L/EIF6/CDYL/SUV39H1/POLR2E/PRKRA/MORF4  
'XXYLT1/PMM2/SDF2L1/DOLK/EOGT/B3GALT6/ARFGEF1/ST8SIA4/GCNT1/B3GNT8  
'XXYLT1/PMM2/SDF2L1/DOLK/EOGT/B3GALT6/ARFGEF1/ST8SIA4/GCNT1/B3GNT8



24/SPRED1/POLR2G/MMP2/UBASH3B/CD3EAP/HGS/SOCS1/EPHB6/ARPC2/TGFA/PSENEN/ARPC3/SOI  
0AZAP1/NCAPH2/ETV6/DEAF1/POC1A/PAQR8/DNMT3A/CYP26B1/AGFG1/OSBP2/SBF1/ODF2/MSH2/M  
'FBX05/NOC2L/GTPBP4/PRR7/CDKN2B/HDAC2/U2AF2/KDM1A/TESK1/LYN/ITGB1BP1/CDKN1C/DUSI  
'PSMD3/RBX1/PSMD7/TBL1XR1/RACK1/CSNK1G2/JRK/PSMD8/ABL1/EMD/VCP/PSMA1/SFRP2/TNFAI  
'3L/LZTS1/CSNK2B/CDC37/CDK5R1/TECPR1/VPS37B/ATG13/IFT20/PRKAG1/MTERF3/ATG9A/TIG/

3D1/RPL11/EPB41/PARK7

7/DPY30/TMCC1/VAMP3/AP5S1/ANXA8L1/RNF126/VPS29/VPS54/RAB7A/CHMP6/RAB6A/TSG101/GI  
'CCL8/TRIM68/IFITM2/PPARG/MYO1C/NCAM1/IRF4/HLA-C/VAMP3/KIF5B/TRIM62/NUB1/IFNG/S  
3AG6/FAF2/CHAC1/ADD1/SSR1  
5/MYB/PRDX2/ZAP70/MALT1/HLA-G/GATA3/NFATC2



3A/IL34/LEFTY1/MAD2L2/MAPK3/FZD1/P2RY6/CD3E/MAP2K2/CENPE/ATP6AP1/PAK1/PEA15/FGI  
1/TGFB2/CALCA/MAP3K14/TNFK/DVL2/MST1R/PSMD10/C5AR1/LRP8/CCND2/RPS3/STK10/MTCP1,  
'JOSD1/PSMC5/USP39/BECN1/USP48/SPATA2/SNX3/NEDD8/ENY2/TADA3/TRRAP/OTUD3/SKP2/TFI  
TROB/FEZ1/CEP135/ATXN2/CHMP4A/SMCR8

IL1B/ADRA2C/RNF157/MYADM/PLXND1/PPP1CC/NDRG4/NAP1L2/TUBB2B/DVL2/NSMF/LRP8/SRRP  
KAP1L/SH3KBP1/VLDLR/LYPLA2/CPNE1/SHC1/PIK3CD/YWHAH/WNT7B/RAC1/CNTNAP1/ACTB/RAP2  
JIP/RAP2A/CDK5/NREP/CTTN/SPOCK1/ADRA2C/RNF157/PLXND1/GSK3A/NDRG4/NAP1L2/TNIK/TUI  
IL/SH3KBP1/VLDLR/LYPLA2/CPNE1/SHC1/PIK3CD/YWHAH/WNT7B/RAC1/CNTNAP1/ACTB/RAP2A/CI  
D2L2/PSMD2/MAPK3/CD276/IL27RA/HLA-DQB2/CD3E/HLA-A/PAK1/SASH3/SLC39A10/FPR1/MNDA/  
INOS1/TARBP2/ETF1/EIF5A/EIF3E/CAPRIN1/RPUSD3/NSUN4/RHOA/RPL13A/HNRNPR/POLR2D/RPI  
RM1/LAMTOR5/SPOCK2/PSMB8/SPOCK1/SERPINB6/F3/LCK/VIL1/CD27/IFI16/CASP1/PML/USP14/  
RPL39/IL12RB1/COCH/IL15/ILF3/C5AR1/ISG20/EXOSC5/GSDMD/TRAF3/DROSHA/IL4R/APOBEC3I  
Z1/MSX1/RBBP7/SEMA3C/EPB41L3/SEMA3E/MAPT/RERG/CDHR2/ABL1/GNG4/RASAL1/SFRP2/BRAT1  
  
USP48/SPATA2/SNX3/NEDD8/ENY2/TADA3/TRRAP/OTUD3/SKP2/TFPT/PSMB1/ASXL1/USP3/MAP3H  
SLC35C2/FUT11/XXYLT1/PMM2/SDF2L1/DOLK/EOGT/B3GALT6/ARFGEF1/ST8SIA4/GCNT1/B3GNT8

APK2/VAV1/COLEC12/MFGE8/SLC1A7/CD300A/SLC12A9/CLTA/ARPC4/SLC9A1/JMJD6/MAPK3/SYT8  
'TNIK/TUBB2B/COCH/DVL2/LST1/NSMF/LRP8/CDC42SE1/TACSTD2/CAPZB/FGD6/SEMA4B/CDC42/I  
TXN/MLKL/ADRA2C/FGR/LCP2/MAPK11/TGFB2/CALCA/MAP3K14/TNIK/DVL2/MST1R/PSMD10/GCN1/  
'PPHLN1/RBPJ/EPHA2/CYP27B1/EREG/TFDP1/LDB1/ATP7A/ERCC3/KRT15/FOSL2/ATP2A2/STK4/(

MRPL30/APEH/UPF1

\GULP1/CORO1C/SIRPA/BIN1/SPON2/NPC1/GPR107/HSP90AB1/F2RL1/ARPC2/RAB7B/TIGD5/ARI  
2/TMEM119/TESMIN/AXL/PRDX4/KHDRBS1/TTC26/SOHLH2/PIWIL4/HSPB11/RAD51C/PAFAH1B2/H  
24B/NAT10/EEF1A2/MPV17L2/EIF3K/THBS1/PUS7/RPL5/PLK3/JMJD4/SARNP/RPS4X/C8orf88/M  
3R2/TPP1/TMUB1/SDF2L1/BHLHA15/HSP90B1/UBE4B/UBAC2/AUP1/PDIA3/HSPA13/CAV1/DAB2IP/  
\SIGIRR/IDO1/EPHA2/XCL1/CD84/INPP5D/PTPRC/NFKBIL1/PIN1/ADCY7/TLR8/TRIM27/SYT11/

3A5/FKBP1A/DOK1/ATP6V1C1/IQGAP1/ARPC4/PDGFRL/EFNA5/IGSF1/LEFTY1/RGS14/HIF1A/MAPI  
3KBP1/VLDLR/LYPLA2/CPNE1/SHC1/PIK3CD/YWHAH/WNT7B/RAC1/CNTNAP1/ACTB/RAP2A/CDK5/C

IL/PRDX4/KHDRBS1/TTC26/SOHLH2/PIWIL4/HSPB11/RAD51C/PAFAH1B2/HSPA2/ADAM28/SRPK1/IK1/SERPINB6/F3/LCK/VIL1/CD27/IFI16/CASP1/PML/USP14/GPX1/RPS3/TFAP4/CST7/ARRB2/

SL2/ARPC2/SLC1A3/NBEAL2/RELN/S100B/CDH11/ZSWIM5/MARK2/GDI1/EPHB3/PLOD3/NUMBL/LEI3EF2KMT/SEN3/LOXL1/PRKAA2/HDAC10/HAT1/UBA2/MBD3/PIAS4/WDR5/PIH1D1/MORF4L2/MECP2

IL/HYAL2/IFNG/ANXA1/AIM2/NLRC4/TLR1/NOD2/BTN3A2/ARG2/CPTP/LILRB1/RASGRP1/MAPKBP1/IL10RB/SLFN11/APOBEC3F/HYAL2/IFNG/CD207/RELA/AIM2/FAM111A/POLR3A/TRIM15/ZMPSTE81/HAX1/TMEM102/CSNK2A2/PARL/TIMM23/ACACA/TIMM8B/HUWE1/PITRM1/NAIF1/CNP/THEM4/IN447/HSPA9/ARMC6/PSMD5

IT5C3A/GBP2/MAPK3/TRIM11/SERPINE1/IL27RA/SLPI/FUCA2/ISG15/PDZD11/BAIAP2L1/LYPD8/  
3CD/YWHAH/WNT7B/RAC1/CNTNAP1/ACTB/RAP2A/CDK5/CTTN/RNF157/PLXND1/RAB10/C12orf57/  
IT5C3A/GBP2/MAPK3/TRIM11/SERPINE1/IL27RA/SLPI/FUCA2/ISG15/PDZD11/BAIAP2L1/LYPD8/  
IL/RPL39/VPS28/RPL35A/UBE2D1/YWHAQ/RUVBL2/YWHAB/RPS3/RPL27/BAG3/SSR3/NUP155/RPL3

MB3/CALR/RELL2/AXL/ANGPT2/CSPG5/SEMA3E/HPSE/WNT4/NF2/EMILIN1/LIMS1/ABL1/TBCD/VCI

PLXNC1/B4GALNT2/TWSG1/PTK2/PTPN2/THBS1/NOTCH1

3/ATG4D/ATP6VOC/MVB12A/ATP6V0E1/BAG3/VPS18/VPS25/DNM1L/PGAM5/IKBKG/PIP4K2C/RALB,  
3B1/BPIFB2/NFKB2/NT5C3A/GBP2/MAPK3/TRIM11/SERPINE1/IL27RA/SLPI/FUCA2/ISG15/PDZI  
SAH1/RPL10L/DLAT/ITGA2/RPS5/GBA/RPS21/FA2H/MRPL12/RPL7/EIF3I/RPL28/MRPS34/TRMT1  
3/ATG4D/ATP6VOC/MVB12A/ATP6V0E1/BAG3/VPS18/VPS25/DNM1L/PGAM5/IKBKG/PIP4K2C/RALB,

.R1/SLC11A1/JAG1/CD209/LYN/HLA-DRB5/IL1B/JCHAIN/CTSS/TNFSF13B/WAS/PTPN6/CD27/SAM

/GRB7/EMB/SEMA4B/GRB2/PARD6B/LLGL1/SEMA4D/APP/MAPK7/SEMA4F/SEMA5B/STK25/ARHGDIA/  
'TRAF3/ARRB2/PRKCI/CMKLR1/APP/CARD16/IKBKG/BTK/PELI1/ZNF675/DAP/TRIM25/TAF12/PII

INP03/EFCAB7/RPL11/MFHAS1/RBM22/KPNA4/PARK7/HEATR3/HYAL2/IFNG/IP07/SKP1/SESN2/P1  
7/MAP4K1/MAP4K2/DAB2IP  
SYT17/WNT5A/PPP3CB/OLFM1/GATA4/WNT3A



CS1/SLC51B/CCT2/CD58/IRF3/F2RL1/DYNLL1/NDUFAF2/GDI1/PPARD/GPI/SERPINB1/PPIA/ZC  
31/OPTN/GNAI3/BNIP3L/LZTS1/SREBF1/TRIM21/CDC37/CDK5R1/ATG13/IFT20/PRKAG1/WDR41/1

TP53/FEZ1/SPTLC2/CHMP4A/SMCR8/ATP6V1D/CLEC16A/RNF41  
13A

RY6/MAP2K2/ATP6AP1/PPP2R1A/PAK1/PEA15/FGFR4/SPRED1/RASGEF1A/FPR1/SIRPA/HGS/F2RI  
B7B/LRRC14/CTLA4/ARPC3/WIPF1/NPLOC4/PSMB2/SH2B2/IRF7/ZC3H12A/PSME3/TNIP2/FLOT1/  
B/ITGB1BP1/ARPC5L/RAC1/LAMTOR5/CDK5/CTTN/ADRA2C/MYADM/WAS/VIL1/AP2M1/CIT/PFN1/  
4/CDK5/VANGL1/PSMB8/PSMB10/GNB1/PSMA5/PSMD13/PSMC4/GSK3A/AP2M1/TNIN/FGFR2/DVL2,

2C/SEMA4B/CDC42/SERTAD3/SEMA4D/SYT1/APP/GAL/SYT3/SEMA4F/SEMA5B/NME6/RACK1/MSX1,

PRF/CYCS/ANKLE2/ILKAP/SYMPK/CALM2/PTBP1/PTPN12/CD33/BOD1/SPPL3/PTPN2/STYXL1/PTP

PRKAR1B/GSKIP/YWHAG/GPS1/HEG1/SH3BP5L/GMFB/DUSP18/CAV1/DAB2IP/RPTOR/EPHB2/CIB1/I

RY6/MAP2K2/ATP6AP1/PPP2R1A/PAK1/PEA15/FGFR4/SPRED1/RASGEF1A/FPR1/SIRPA/HGS/F2RI

/PLA2G1B/UBA52/DUSP7/MAP3K10/PIH1D1/CDK5R1/TPD52L1/DAXX/RHOA/STK3/RAPGEF1/ATP2I

7A/HSPA5/DDX56/RAB11A/PACSIN1/PPP2R5B/METRNL/APBB1/SRF/CAPRIN1/RHOA/RAPGEF1/DNMT3A

5RAP1

l/TSEN34/EDC4/GTF2H1/RPA1/TSEN15/RNASEK/NOL9/UTP23/MUS81/RPP30/RNASEH1/SND1/ATAI

USP7/MAP3K10/DGKQ/CDK5R1/PRKAR1B/DAXX/STK3/RAPGEF1/ATG13/MAP3K1/MINK1/RPLP1/MAI

IA5B/STK25/ARHGDIA/SCN1B/SEMA3C/SEMA3E/MAPT/CHN1/EXT1/ABL1/VCL/KEL/DBNL/PLXNC1/I  
J1/VCP/SFRP2/USP5/TRADD/BAG2/BAD/BCL10/SGTA/RCN3/TNFSF15/PTK2/CASP8/PDCD2/PLK3/M

ADM/ADCY5/CCL19/XCL1/CLIC2/HTT/EDNRA/CAV1/CALM3/CCR10/PKD1/PTPRC/CXCL10/CNR1/GN/

APIN/IST1/ARF1/SNX3/KLHL12/SAMD9L/CAV2/PEF1/PI4K2A/CAV1/VPS4A/NECTIN2/RAB1A/RFX2

OR5L2/OR5H1/OR8U1/OR10R2/OR11H12/OR6Y1/OR8K3/OR8J1/OR1A2/OR10A4/OR6N1/OR2T5/OR5AI

5/MEIS1/HSPA1A/CTNNBIP1/CLDN18/CD101/LEO1

PS35/MRPS33/MRPS10/MRPL45/NGRN/MRPL41/MRPL49/MRRF/MRPS6/TUFM/OXA1L/MRPS28/MRPL3C



IN3/RAB23/VPS41/ATG16L1/RB1CC1/ULK3/HOOK3

3/ERCC1/C9orf116/TMEM109/FNTA/HSPA5/BCL2L1  
3/ERCC1/C9orf116/TMEM109/FNTA/HSPA5/BCL2L1

FBXL7/UBE2N/ANAPC5/CDC27/CDC34/UBE4B/UBE2E2/RNF114/PARP10/FBX06/FBX041/STUB1/ANAPC10/RAPGEF1/MAP3K1/GPS1/MINK1/ADORA2B/UBE2N/MECOM/CCL19/SH3RF3/IRAK2/MAP4K1/MAP4H

ABAM1/CBL/SEMA5B/ANGPT2/RFWD3/NABP1/RAD9A/XRCC4/CEP250/OGG1/RIC8A/CUL4B/POLD3/MAP11C/RNF19B/GNA12/NPM1/POLR2G/BMF/PDCL3/HGS/NPC1/DDA1/YBX1/GPSM1/HSP90AB1/PABPC1/IR

IL3/SNRPD3/PWP1/MRM2/PRMT5/METTL2A/PCMT1/PHF1/DPY30/TRMT2A/THADA/BCOR/SETDB1/MYC  
ILRP3/WNT5A/C5AR2

CD38/GAK/ACTN4

l/FOXK2/CSNK1E/NUP93/NUP205/NUP37/PSMB2/DDIT4/PPP1CA/NDC1/PIM2/NUP188/ZC3H12A/PS

'RASSF8/SRF/RHOA/RAPGEF1/ACTN4/HEG1/EPHA2/CORO2B/NPHP4/GPBAR1/CAV1/LDB1/RAB13

3/DEAF1/TGFB2/VASH2/PSMC4/ASCL2/SOCS3/SMPD4/FGFR2/PLK4/DVL2/PFN1/BYSL/EIF4A3/GC  
3SCN/CHN1/RHOT2/ABL1/RASAL1/SIPA1/ARAP1/SGSM3/ARHGAP11A/ARHGEF3/SRGAP2/DNM2/ARH

'FGFR1/MT3/FGFR3/PAK4/EXTL3/SHC1/MKKS/KIF14/BCAR1/CDK5/WFS1/LAMTOR1/CTTN/MEG3/WV  
J10/WFS1/WWC3/PHB/STMN3/MYADM/TGFB2/TAF9/PTPN6/RASA3/GSK3A/SOCS3/PSMD10/GPX1/KP1

3/HK1/DNM1L/TRPM4/PDCD5/STX4/RACK1/CLEC5A/HCAR2/ABCG1/CCL3/ACHE/CEMIP/ABL1/EMD/M  
JS1/CTSS/PDGFA/CD47/SPOCK2/ADAM12/LOXL2/TGFB2/ADAM19/ADAMTS9/CCDC80/BGN/COL6A2/I

'3/STMN3/DEAF1/TGFB2/VASH2/PSMC4/ASCL2/SOCS3/SMPD4/FGFR2/PLK4/DVL2/PFN1/BYSL/EII

9/SCAMP4/ECE2/COR07/GALNT18/PPP6R1/GPSM1/B3GNT7/TGFA/CHPF2/COPE/TMED9/PSENN/SC  
CENP/CBX3/DVL3/BLM/RSPH1/NHP2/HDAC2/KDM1A/NASP/CHRA1/PRIM1/SSB/EHMT2/BUD31/SSI  
GD/STXBP2/TMEM165/HSPA8/RRAGC/NEU1/GM2A/HLA-DQB2/TCIRG1/FUCA2/RNF19B/CD63/STK11  
3/KMT5C/TIPIN/PADI2/CHD4/RUVBL2/CENPB/CCND2/EXOSC5/RBBP4/POLA1/TBX19/DFFA/UBE2A/  
J/EME1/ZNF385A/MAGED1/HMGB3/CREB3L1/CHEK1/RAN/HSF1/RHNO1/NABP2/KIF18A/RANGAP1/MC  
./NPM1/NARF/UPF3B/MNDA/MCRS1/CD3EAP/B3GNT9/SMARCA4/NOL3/METTL1/RBM3/ZCCHC17/STA1  
GD/STXBP2/TMEM165/HSPA8/RRAGC/NEU1/GM2A/HLA-DQB2/TCIRG1/FUCA2/RNF19B/CD63/STK11  
A3/SLC44A2/SLC15A3/AP2S1/OSTM1/UBA1/ATP6VOC/TMEM63A/KPTN/BORCS8/GLMP/STARD3/VPS1  
1/CLTA/UNC93B1/FTH1/RRAGD/STXBP2/TMEM165/HSPA8/RRAGC/NEU1/GM2A/HLA-DQB2/TCIRG1/I  
'CSNK1D/ATF4/CDK2/MKKS/NLRC5/CAMSAP2/DCTN2/RAB11FIP4/DCTN5/B9D2/TCP1/KIFC3/POC5/  
'SLC1A4/CHD3/NPM1/UPF3B/BRCA1/PCNA/XRCC2/SGO1/SFI1/DYNLRB1/IFT52/DYNLL1/DYNC1H1/  
IP/CSNK1D/KIF14/KNSTRN/RAB11FIP4/ANXA11/CTTN/KIF15/RASSF1/POC1A/NUP85/HAUS8/DYNC  
RRAS/PPP1R9B/ARPC3/CDH11/HYOU1/PDLIM3/KRT18/PPP1CA/COR01B/PIP5K1C/PPIA/TGM2/LASI  
'SNF8/SLC11A1/HLA-DRB5/RAB11FIP4/RAC1/TMEM163/EHD2/LAMTOR5/RAP2A/LAMTOR1/TMEM9/C  
'DDOST/CD300A/ARFGEF3/FLOT2/IQGAP1/HLA-DPB1/CLTA/STXBP2/ITGAX/SYT8/HSPA8/HLA-DQI  
NI2/ADAM8/MYO1G/CAP1/CAPZA1/RTKN/MYO1F/DAPK3/FHOD3/HCLS1/PSTPIP1/STK17B/DCTN2//  
'RBM19/MED19/PIAS3/CBX4/FIBP/CENPI/SFPQ/PQBP1/IFI16/SRSF12/PPP1CC/PML/C12orf57/I  
'SYT1/APP/DNM1L/AP1G2/SYT3/CPE/STX4/RABAC1/M6PR/COPG1/ATP6VOD1/PDCD6/RASSF9/SEC1  
ABCC4/ATAD3B/CHIT1/PSMD14/TIMP2/SYNGR1/DNAJC5/HSPA6/DDOST/ALOX5/PLEKH02/MIF/CD3C  
AP1/HLA-DPB1/CLTA/STXBP2/ITGAX/SYT8/HSPA8/HLA-DQB2/TCIRG1/HLA-A/CD63/DOK3/ANKRD2  
IGAP1/MCM5/SMARCD1/CENPL/HMGB2/TCF3/TRIM28/POLA2/BRMS1/SIRT6/SGO2/ARPC4/WDR76/G1  
'UNC93B1/ZDHHC7/B4GALT5/CREB3/GBP2/TMEM165/GALNT10/RHBDF1/HLA-DQB2/BCL9/HLA-A/AI  
31/NPC1/CCT2/C3AR1/HSP90AB1/DYNC1H1/RAB7B/FMOD/CLCN7/MFSD12/NPC2/SORT1/PLBD2/PA2  
ID1/CD68/ARHGAP1/HLA-DQA2/LAMP3/SNF8/SLC11A1/HLA-DRB5/RAB11FIP4/RAC1/TMEM163/EHI  
LA/NASP/CHRA1/PRIM1/SSB/EHMT2/BUD31/SSRP1/ACTB/MTA2/WDHD1/TCP1/SWI5/DNMT3A/THOC  
AB1/STAT1/XRCC3/TGFA/CAPN6/CTLA4/GDPD3/S100B/SORT1/STX10/ODC1/KRT18/COR01B/UNC2  
22/PABPC1/RRAS/PPP1R9B/ARPC3/CDH11/HYOU1/PDLIM3/KRT18/PPP1CA/COR01B/PIP5K1C/PPI/  
L/B3GNT5/GBGT1/CHST1/ABCB6/PTGES2/FUT4/STX6/B3GNT9/SCAMP4/ECE2/COR07/GALNT18/PPI  
A3/SLC44A2/SLC15A3/AP2S1/OSTM1/UBA1/ATP6VOC/TMEM63A/KPTN/BORCS8/GLMP/STARD3/VPS1  
D1IP1/TUBB4B/KIF12/TBCB/KIF3C/KIF18A/CCT6A/RHOQ/KIF21B/WIPF3/CCT3/CARMIL1/COL5A1  
D1IP1/TUBB4B/KIF12/TBCB/KIF3C/KIF18A/CCT6A/RHOQ/KIF21B/WIPF3/CCT3/CARMIL1/COL5A1  
'QPCT/RHOG/ISLR/TUBB4B/GRN/TNFAIP6/RAB11FIP5/CD53/PLAU/GIPC1/DTNBP1/ABCC4/ATAD3F  
JBB4B/KIF12/TBCB/KIF3C/KIF18A/CCT6A/RHOQ/KIF21B/WIPF3/CCT3/CARMIL1/COL5A1/GAS2L3  
TPM2/IQGAP1/RGS14/SLC1A4/PLEC/LCP1/MAP1S/TPM3/MAP2K2/CENPE/PAK1/NUDC/NARF/KLC3/1  
2/SF3B5/SNRPC/RPL10L/EMG1/NOP58/ATXN2L/SSB/RAC1/BUD31/RPS5/DAZAP1/SNRNP40/ZNF593  
3FR1/HAT1/CSNK2A1/USF1/MBD3/RNF2/ANP32E/RBMX/NCAPD3/SRF/ACTR5/GATAD2A/DHX9/SMAR  
'DYNLT1/HAUS1/TUBB4A/CSNK1D/KIF14/CAMSAP2/HSPH1/CCT7/DCTN2/KNSTRN/REEP2/FKBP4/CI  
3OCAD/CAPN1/CAP1/FZD2/TSPAN4/ARPC5L/TNC/RAC1/ITGA2/RPS5/ACTB/GNB2/BCAR1/CTTN/RPI  
'CAPN1/CAP1/FZD2/TSPAN4/ARPC5L/TNC/RAC1/ITGA2/RPS5/ACTB/GNB2/BCAR1/CTTN/RPL7/MC/  
3OCAD/CAPN1/CAP1/FZD2/TSPAN4/ARPC5L/TNC/RAC1/ITGA2/RPS5/ACTB/GNB2/BCAR1/CTTN/RPI  
D1D10C/FCGR3B/RAB4B/KCNAB2/RAB3D/HVCN1/VAMP8/RAB5C/MOXD1/PSAP/CD33/CD177/DMBT1/(  
N/FGR/MYADM/PLXND1/FAM89B/VIL1/SAMSN1/WASF1/INPP5J/PIEZO1/CADM4/KPTN/ARF4/ABI3/  
C5/NUP85/PPP1CC/SIRT7/CENPK/NUP43/PML/DYNC1L1/DSN1/PARP1/THOC6/KMT5C/MSH2/CENI  
TOR1/TMEM9/NFAM1/GNB1/KXD1/AP2M1/ABCA2/DRAM2/SLC29A3/MAP1LC3B/SLC44A2/SLC15A3//  
RPLP1/DHX9/RPL32/RPL30/MRPL15/C12orf65/MRPL4/SURF6/RPS9/RPS14/RPS27/MRPS24/RPL25  
A/FBXO45/RPL36/UBA52/BORCS6/RPL19/RPS11/RPL22L1/RPL13A/RPL37A/STXBP5/CTU1/RPLP1/  
D3/HSPA2

ITXR1/DOCK8/NCKAP1/PLCG1/PPP1R9A/PXN/CCDC88A/SH3RF1/PTPN13

3A/SF3B6/MAGOHB/SNRPD3/PRPF38B/TFIP11/IK/PPP1R8/ADAR/SNRNP200/RBM22/HNRNPC/BUD1;  
S27/MRPS24/RPL29/EIF2D/MRPL33/MRPS5/RPL13/MRPL36/RPL4/RPL41/RPL9/MRPL14/RPS6/RI  
K2B/AP2A2/ATP6AP2/SLC2A3/PSMC3/PPIE/RHOA

RPL22/MRPL58/MRPL38/MRPS30



2/RABEP2/VOPP1/TCN2/RAB32/CXCR4/FLOT2/VPS37C/HLA-DPB1/RAB15/CLTA/UNC93B1/EHBP1I  
I/KCTD10/CDK5/KDM5B/UBE2L3/CBX4/TAF9/TRMT6/SOCS3/ANAPC11/KDM5C/UBE2D1/STT3A/DCAI

JNX3/GTF2H1/NAA15/RBPJ/TAF13/PMF1/TBP/MMS19/CTBP1/TFDP1/KLF5/TLE6/HAX1/LDB1/PKN  
'DNM2/MCHR1/ADAM17/ROM1/MYO6/PACSIN2/LIMA1/PACSIN1/TLN1/EVC/RHOA/PDPN/FAP/SLC22/

'NUP85/BANF1/NUP43/MYOF/INTS1/AGFG1/PARP1/NSMF/RAE1/CCND2/TMEM43/ANXA4/POLA1/NUI

IC/CNIH2/PTPRS/SEC23B/SYP

3/KDM4A/NOLC1/ESRRA/NOL11/ZNRD1/MTDH/RPP38/PRMT7/STOX1/DDX46/DUSP11/TWISTNB/IPC

TBP2/ADD3/MYO6/PARD3/WIPF2/EXOC3/DSTN/CYTIP/PLEKHH2/RHOA/ACTN4/FNBP1L/SPTAN1/CTI

AMP8/RAB5C/GNLY/HSP90AA1/SRGAP2/DNM2/RPS27A/DMBT1/TLR2/MYO6/ANXA3/UBA52/CD2AP/HI

7A/ARL1/CBY1/ARFGEF1/PLEKHA8/GCNT1/KIAA1324/CHAC1/ATP9A/AP4B1/ATP2C1/DPY30/IGF2

1/MCOLN1/WNT5A/WNT3A/ROR2

PTP1B/GOSR2/RAB27B/AP2B1/HBEGF/COPB1/BTC/AP2A1/EREG/VPS33A/ARF1/STEAP2/COPA/SNX3/  
RAB35/PPP1R9B/TMED9/PLCB3/P2RX5/STX10/PPP1CA/RAB35/PIP5K1C/HIP1R/ARFGAP1/MT3/FLOT1/  
PTPN6/PSMD13/COMMD9/GALNS/DSN1/IMPDH2/PSMD11/PSMD1/PADI2/TRAPPC1/GSDMD/CNN3

IL2/TATDN2/WTAP/INPPL1/FNDC1/HNRNPU/SARNP/BNIP3L/MAGOH/HSF4/PACSIN2/ARL6IP4/GTF2I/  
ADAM17/CASP8/CAPN2/CD177/GNAI3/TLR2/ADD3/PACSIN2

ADAM17/CASP8/CAPN2/CD177/GNAI3/TLR2/ADD3/PACSIN2

GNAI1/ADAM17/CASP8/CAPN2/CD177/GNAI3/TLR2/ADD3/PACSIN2

RPC5/STMN2/HSP90AA1/DNM2/AAK1/MAP1A/RAB3A/LMTK2/ZPR1/TUBB3/KIF20B/PACSIN1/CDK5R1

IL1/TAF11/GTF2E1/MED14/TAF4/SNAPC1/TAF2/GATA4/NFATC1/MED6

FTL/FGR/PSMA5/TGFB2/PTPN6/PSMD13/COMMD9/GALNS/DSN1/IMPDH2/PSMD11/PSMD1/PADI2/TI  
NSMF/RIMS3/NCL/PARD6B/NRBP1/LLGL1/CDC42/PPF1A3/MYO9B/KLHL17/ACTL8/AP3D1/GMFG/AI  
MLM3/CIB1/SLC9A6/KLC1/CNR1/PPP1R9A/UTRN/ADGRL1/UCN/KCNC4/SYT11/KIF5B/TIAM2/FKBP1

044/SKP2/FBXO10/ENC1/CDC23/KLHL25/RNF144A/BRAP/BCOR/CAND1/MED20/WWP2/ARIH2/ANAF

FTL/FGR/PSMA5/TGFB2/PTPN6/PSMD13/COMMD9/GALNS/DSN1/IMPDH2/PSMD11/PSMD1/PADI2/TI

768/TADA3/PAF1/RRAP/PIK3CB/RPRD1A/MAP3K7/TCEA1/GTF2A2/CCNG2/POLR3F/ULK1/POLR2I

/ABI1/TAOK2/MAPK8IP3/GAP43/PTBP2/NRP1/ZFYVE27

/MRPL3/IMMP1L/TIMM9/TIMM22/MRPL20/MRPL24/PAM16/MRPS16/COX4I1/MRPL55/NDUFB2/CHCI

/ARF1/RAB9A/YIPF1/HTT/ATP7A/SLC9A6/LITAF/VPS4A/SLC9A9/PLD1/KIAA1324/SDF4/VPS16,  
52/HSP90AB1/STAT1/SLC1A3/CAD/GABRA3/PPP1R9B/HDAC1/RELN/S100B/SORT1/RIN1/MARK2/GI

P3/GAP43/PTBP2/NRP1/ZFYVE27

3HD17A/MINK1/RPL30/BCAS1/MPP2/ARF1/RPS14/RPS27/ADD1/LIN7B/PPP1R9A/ADGRL1/BCR/EPI

AP1/NISCH/LZTR1/CD274/ITGB1/EHD3/INPP5F/STX8/AVL9

3F/FXR1/SMN2/CNOT2/ELAVL1/MAEL/DDX1/LSM3/TARDBP/ATXN2/GRSF1/TDRD7/DDX19A/PNRC2,  
AR1B/RHOA/ABHD17A/STXBP1/ATP2B4/AP2B1/ADORA2B/CTBP1/ARF1/ARHGAP22/EPHB2/CNR1/PII

AS1/MPP2/ARF1/RPS14/RPS27/ADD1/LIN7B/PPP1R9A/ADGRL1/BCR/EPB41/NEURL1/SYT11/PDE4

3C1D20/SLC25A3/SYT11/ZDHHC20/VAMP3/RAB3C/FAR2/VAMP1/YIF1A/ENTPD4/PTPRS/TEX261/S

3P4/POLA1/SMARCC1/MCM8/VCX/KAT2A/CBX5/CABIN1/MTF2/NCOR2/PCGF2/HMG1/POLQ/FUS/RAI  
OR/CDK7/DRAP1/BATF3/RUVBL2/MYCBP/SAP30/PRPF6/SMARCC1/USP22/KAT2A/MED24/PRRX1/ZM  
APK11/LCK/HUNK/MAP3K14/GSK3A/CDK18/NUAK2/TNIK/SLA/FGFR2/CIT/PLK4/MST1R/STK32C/LA  
MRPL9/NDC1/NUP188/RPL17/COL5A2/PLLP/ACTG1/RPLP2/MRPS23/COL6A3/TUBB4A/RPSA/JAG1,  
A3/CASP1/ARHGAP30/AGFG1/ABR/SIPA1L3/DNAJC10/SYDE1/PTPA/RUNDC1/LLGL1/MTCP1/ARHG/  
MNL1/KIF12/RAB11FIP5/TMEM201/KIF3C/KIF18A/CRMP1/CFL1/MICALL2/KIF21B/GIPC1/EPB41  
NKP/FGFR3/PAK4/PIP4K2A/PAPSS1/CCL2/DAPK3/PIK3CD/CSNK1D/CDK2/TESK1/STK17B/LYN/CI  
MYL6B/ABCC5/GINS4/GNAZ/OLA1/DHX37/DCTPP1/RRAGD/RUVBL1/GBP2/RGS14/RAB25/CHTF18/I  
MYL6B/ABCC5/GINS4/GNAZ/OLA1/DHX37/DCTPP1/RRAGD/RUVBL1/GBP2/RGS14/RAB25/CHTF18/I  
MYL6B/ABCC5/GINS4/GNAZ/OLA1/DHX37/DCTPP1/RRAGD/RUVBL1/GBP2/RGS14/RAB25/CHTF18/I  
INS4/GNAZ/OLA1/DHX37/RRAGD/RUVBL1/GBP2/RGS14/RAB25/CHTF18/RIT1/HSPA8/RRAGC/TCII  
TK11IP/NPM1/SPRED1/STX1A/PCNA/THY1/RHOF/SGO1/SIRPA/SOCS1/CKS1B/HSP90AB1/LRRC14,  
RPA/SOCS1/CKS1B/HSP90AB1/SH2B2/PITPNM1/PAM/TNIP2/CCNO/PPME1/DUSP2/FBX05/AATF/G  
F3/TCEAL8/HSP90AB1/DYNLL1/HDAC1/WIPF1/CARD19/E2F4/LEF1/FGFR1/TGM2/HIP1R/CBX3/SI  
D16/NCF1/RANGAP1/MGAT5/IGFBP3/PSMD14/SAE1/PPP1R37/TIMP2/RABEP2/CCL5/BEX3/IQGAP1  
JUDC/ISG15/BAIAP2L1/LAMA5/TSPAN8/THY1/ITGB5/CDH6/RPS2/HSP90AB1/STAT1/PUF60/PLCB3  
XPOT/PKN3/RAB11FIP4/RAC1/GNB2/LAMTOR5/KCTD10/LAMTOR1/GNB1/WAS/LSM2/TBC1D13/DVL2  
VIL1/NCALD/PFN1/WASF1/NEB/KPTN/PARVG/CROCC/CAPZB/SMTN/FHOD1/CNN2/VPS18/INF2/CC  
ACVR1/FASTK/STK24/PIM3/SRPK1/CHEK2/MAPKAPK3/CCND3/PRKAA2/ACVR1B/STK40/CSNK2A1,  
TF2/PTPA/DNAL4/MYO9B/POLQ/KATNB1/ABCC10/CCT8/ATP6V0D1/NSF/ABCG1/LONP1/ATP2A3/H  
3F1/CDC42SE1/XPO5/TRAPPC1/DENND6B/RIMS3/FGD6/PARD6B/RUNDC1/LLGL1/INF2/RANBP1/CDC  
3F1/CDC42SE1/XPO5/TRAPPC1/DENND6B/RIMS3/FGD6/PARD6B/RUNDC1/LLGL1/INF2/RANBP1/CDC

ARHGDIA/RIC8A/RGS3/TBC1D10C/RASAL3/TBC1D22A/CHN1/TBCD/NPRL3/RASAL1/SIPA1/ARAP1/IFI  
5/KATNB1/OGG1/NDE1/PIFO/CLIP3/DRG1/MAPT/CKAP5/EMD/TBCD/RAD51D/STMN2/HOOK2/DNM2/C  
1/LDHA/CTTN/CDH17/EIF2S3/RAB10/UBAP2/EVPL/PFN1/EP515L1/GCN1/TACSTD2/YWHAB/GOLG/  
31/RHOT2/GSPT2/GNG4/GNGT2/RAB5C/GTPBP3/GPN2/DNM2/RASL12/ARFRP1/GNAI3/RAB3A/RAB11  
3B/CCL3L3/CRLF1/OSM/CCL8/DAB2IP

1/ARAP1/TBC1D7/SGSM3/ARHGAP11A/ARGAP2/TNK2/TBC1D22B/ARHGEF11/SMAP1/PLEKHG6/ARHG/  
EKGH6/ARHGAP28/ADPRH/AGAP3/ACAP3/STXBP5/DOCK2/SGSM1/RANBP3/DAB2IP/PREX1/ARHGAP2

IF20B/KIF22

CHD7/MGME1/UNG/DNASE1/TERF1/ERCC2/RAD54B/LIG3/HELB/XRCC5/DDX1/TDP2/TEP1/ASCC3/1

TD13/DOCK7/MAP3K11/VAV3/PLEKHG5

I/KAT5/SUZ12/MSL3/BAZ1B/L3MBTL1/EZH1/MCM3AP/PRMT7

1/RPL9/MRPL14/RPS6/RPL24/RPL11/RPL10/RPS24/MRPL3/RPS3A/MRPL20/RPL14/MRPL24/MRPS1

CSNK1E/MARK2/POLR3K/CDS1/EPHB3/POLR2H/RPS6KA4/PIP5K1C/FGFR1/PIM2/CCNO/PNKP/FGFI

RBM8A/METTL3/CSTF3/SF3B6/HNRNPA0/CELF2/RPL41/PPP1R8/UNK/HNRNPD/PARK7/HNRNPC/RP5

94K2A/PAPSS1/CCL2/DAPK3/PIK3CD/CSNK1D/CDK2/TESK1/STK17B/LYN/CDC42BPG/PKN3/ALPK3/  
RPL5/RPS27A/PIAS4/RAD18/TRAF4/HSPA5/UBA52/TRIM37/UBE2D2/APBB1/DAXX/NEK6/GLMN/RNF  
1/CAV1/DAB2IP/RPTOR/CNKSR1/ACTR1A/STUB1

18/TRAF4/HSPA5/UBA52/TRIM37/UBE2D2/APBB1/DAXX/NEK6/GLMN/RNF8/TNFRSF14/KCNH2/FAF1

[P2/GNL3/DRG1/RERG/RHEB/RAB4B/DAP3/EEF1A2/RAB3D/DIRAS1/RHOT2/GSPT2/CIITA/SRPRB/I  
R2G1/RERG/RHEB/RAB4B/DAP3/EEF1A2/RAB3D/DIRAS1/RHOT2/GSPT2/CIITA/SRPRB/RAB5C/GTPBI



EB/RAB4B/DAP3/EEF1A2/RAB3D/DIRAS1/RHOT2/GSPT2/CIITA/SRPRB/RAB5C/GTPBP3/GPN2/DNM2  
EB/RAB4B/DAP3/EEF1A2/RAB3D/DIRAS1/RHOT2/GSPT2/CIITA/SRPRB/RAB5C/GTPBP3/GPN2/DNM2

24/C2CD2L/ING2/PIK3C2B/WDR45/APPL2/ESYT1/HIP1/MAPKAP1/PITPNC1/PLCD1/DAPP1/FGD2,

EEF1A2/RAB3D/DIRAS1/RHOT2/GSPT2/CIITA/SRPRB/RAB5C/GTPBP3/GPN2/DNM2/RASL12/ARFRP1

.2/APP/GAL/CDC42EP2/SEMA4F/GMFG/SEMA5B/CSPG5/SEMA3C/SEMA3E/MAPT/WNT4/CCL3/SFRP2,

3B/RAB4B/DAP3/EEF1A2/RAB3D/DIRAS1/RHOT2/GSPT2/CIITA/SRPRB/RAB5C/GTPBP3/GPN2/DNM2  
3B/RAB4B/DAP3/EEF1A2/RAB3D/DIRAS1/RHOT2/GSPT2/CIITA/SRPRB/RAB5C/GTPBP3/GPN2/DNM2

2/MED19/PIAS3/WFS1/MIER2/TAF9/COMMD7/FAM89B/DNMT3A/IFI16/ASCL2/E2F2/KCTD1/PARP1,

TN4/NFKBIB/HINFP/DHX9/MED7/NR1H2/GMEB2/ZMIZ1/CCAR2/PMF1/MMS19/TFDP1/ARID5B/CCAI  
4/DDX10/POLR2D/DHX15/TOE1/TGS1/DARS2/TSEN34/DHX9/RNMT/TYW3/YARS2/PARS2/DDX55/HAI

2F7/PBXIP1/KCNIP3/HDAC3/AEBP1/TSG101/TDP2/C1QBP/APEX1/ZNF85/NACC2/EZH1/ZNF653/1

5L2/OR5H1/OR8U1/OR10R2/OR11H12/OR6Y1/OR8K3/OR8J1/OR1A2/OR10A4/OR6N1/OR2T5/OR5A

PG5/SEMA3C/SEMA3E/MAPT/WNT4/CCL3

5/DYNC1I2/HSPA14/KIF20B/RFC5/TAPBP/ATP2B4/TAP2/DHX9/SMARCA5/GTF2H1/SMARCAL1/MSH

5/KLHL21/UBE2D2/CHFR/TRIM69/RNF8/UBE2F/MED7/ZMIZ1/FBXL7/UBE2N/ANAPC5/HECTD3/CD

31/SALL2/IRF7/PNKP/NONO/SIX2/HEYL/HDAC2/ATF4/NLRC5/SPIB/MITF/MED8/HCF1/RFX5/SSI

74/TPPP3/DYNLT1/GPSM2/HAUS1/FBX05/SPAG1/RSPH1/TUBB4A/RANGRF/AUNIP/CSNK1D/DNAAF5,  
/MCM7/HRAS/PLCB1/USH1C/KIF11/MCM3/NUP62/RCC1/GTSE1/SPAG5/MAPRE1/TUBB/EZH2/CDC25,  
C2/ST14/EFNB1/MAP1S/PAK1/CRABP2/GNA12/LAMA5/ANKRD27/NRCAM/THY1/RHOF/CORO1C/CDH6,  
RCA1/MNDA/ZNF580/SIRPA/SPON2/SOCS1/CD58/IRF1/IRF3/C3AR1/HSP90AB1/F2RL1/STAT1/RAI  
/IRF1/IRF3/C3AR1/HSP90AB1/F2RL1/STAT1/RAB7B/NPL0C4/CD83/POLR3K/LEF1/POLR2H/RPS6I  
S3/GSDMD/PRKD2/LUM/CD6/POLR2L/DDX41/IL4R/APP/ADRA2A/TLR5/POLR2K/HK1/XRCC6/GPATCI  
RG4/RAB10/PML/SOCS3/FGFR2/DVL2/PFN1/AP2S1/PSMD10/PSMD11/VDR/PSMD1/GORAB/PSMA7/T  
3PA8/NEU1/LCP1/GM2A/IL27RA/TCIRG1/SLPI/FUCA2/CD63/DOK3/STK11IP/RNASET2/FPR1/MND  
TCIRG1/SLPI/FUCA2/CD63/DOK3/STK11IP/RNASET2/FPR1/MNDA/PTGES2/RAP2B/GYG1/ARHGAP9,  
/HK3/CCT2/CD58/C3AR1/HSP90AB1/F2RL1/PRSS3/DYNLL1/DYNC1H1/ILF2/AMPD3/NPC2/NBEAL2,  
/DYNC1H1/ILF2/AMPD3/NPC2/NBEAL2/OLR1/SLC2A5/GPI/PA2G4/SERPINB1/PPIA/RAB24/ACLY/I  
3PA8/NEU1/LCP1/GM2A/IL27RA/TCIRG1/SLPI/FUCA2/CD63/DOK3/STK11IP/RNASET2/FPR1/MND  
TH1/STXBP2/MAD2L2/PSMD2/ITGAX/HSPA8/NEU1/GM2A/IL27RA/TCIRG1/HLA-A/SLPI/FUCA2/CD  
PRSS3/DYNLL1/DYNC1H1/ILF2/AMPD3/NPC2/NBEAL2/OLR1/SLC2A5/GPI/PA2G4/SERPINB1/PPIA,  
/CD83/BATF2/PLA2G2D/TFE3/NCAPG2/EPHB3/PRELID1/PSMB2/LEF1/PDCD1/IRF7/ZC3H12A/PSMI  
/CCR1/IL12RB1/CYP26B1/CD79A/OSTM1/PARP1/IL15/LTBR/MSH2/BATF3/SBNO2/DROSHA/CDC42,  
2/BDKRB1/CCL5/BAX/CD86/MAPKAPK2/VAV1/COLEC12/PHPT1/TNFSF9/MIF/CD300A/FLOT2/ZP3/I  
CR1/CD209/LYN/HLA-DRB5/CARD11/FPR3/MUC3A/RAC1/CBFB/PSMB4/ACTB/BCAR1/CTSS/CD47/P  
)/PSMD11/PSMD1/C5AR1/PSMA7/RPS3/PRKD2/PSMB3/GRB2/CDC42/MUC20/CMKLR1/PSMD4/PSMD3,  
NS4/PRKDC/DCTPP1/RUVBL1/MAD2L2/CHTF18/MAPK3/APEX2/IL27RA/MAP1S/MND1/DKC1/PPP2R1  
/BARD1/UBE2A/MCM8/POLR2L/TOPBP1/CBX8/POLR2K/CETN2/XRCC6/HMGN1/POLQ/RBX1/MUTYH/P  
2/TAF9/SFPQ/DNMT3A/ATAD2/SIRT7/CENPK/NAP1L4/NAP1L2/KDM5C/SET/SMARCB1/SMYD3/KMT  
31/DAZAP1/SNRNP40/AKAP8L/UTP18/RBM19/PPIL1/RPS21/UTP14A/RPL7/RBMX2/NPM3/POP1/SFI  
2/RPLP0/RPL18/RPL23/RACK1/GADD45GIP1/VIM/MRPL10/TRIM71/TNIP1/DPH7/ZNF598/PLEKH  
R1/HMOX1/CCL5/DNAJC5/HSPA6/DDOST/ALOX5/PLEKH02/MIF/CD300A/CANT1/ZP3/IQGAP1/RAB1  
/NCKAP1L/SH3KBP1/ADAM8/VLDLR/LYPLA2/CCL2/SHC1/PIK3CD/CXCL9/CXCL3/CXCL13/DEFB1/R  
15/NPM1/RBBP8/SPRED1/BRCA1/NSMCE2/MNDA/POLR2G/PCNA/BCL2L12/MCRS1/XRCC2/CHAF1A/A  
/NPM1/CHMP4C/BRCA1/KLC3/TUBB6/XRCC2/TUBA1A/TUBB2A/SGO1/TLL1/DYNLRB1/IFT52/MSTO  
A1A/CKS1B/SFI1/CTDSPL/DYNLL1/DYNC1H1/SPDL1/XRCC3/TICRR/TGFA/KNTC1/PPP1R9B/E2F8/I  
3F9/MIF/ZP3/HLA-DPB1/PRKDC/IL34/EBI3/HIF1A/RAB25/ITGAX/CD276/LAMC2/P2RY6/EFNB1/  
3/SCAF1/SRPK1/RBM42/CPSF3/DDX23/PTBP1/PRKRIP1/PRPF38A/WTAP/HNRNPU/HTATSF1/LSM8/I  
RIM25/RNF122/PRPF19/UBXN1/PSMD8/KLHL42/VCP/PSMA1/USP5/NSFL1C/UBQLN4/KCTD5/FOXF2,  
P2R1A/NPM1/RBBP8/CHMP4C/BRCA1/RBL1/NSMCE2/PCNA/TUBA1A/BIN1/SFI1/CTDSPL/HSP90AB  
PSM2/NPEPPS/NCKAP1L/PIP4K2A/YWHAH/HCLS1/BBC3/KDM1A/PMAIP1/CCT7/TESK1/ITGB1BP1/  
3LC9A3R1/BID/MT3/BCAP31/TNFRSF10C/ADAM8/PRR7/ITGB3BP/CCL2/DAPK3/PIK3CD/ATF4/YWH  
C11/NUP205/NUP37/PSMB2/KRT18/PPP1CA/LEF1/NDC1/NELFE/POLR2H/IRF7/PPIA/NUP188/ZC3I  
MB4/RBM19/PPIL1/RPS21/PSMB8/RPL7/RPL28/PSMB10/RBMX2/PSMA5/SFPQ/CPSF1/LSM2/PQBP1,  
/MBD3/USP21/MTHFR/RNF2/VEGFA/HSF4/UIMC1/SREBF1/WDR5/PIH1D1/MORF4L2/TRIM37/MECP2,  
PSMD2/HIF1A/MAPK3/ITGAX/HSPA8/LCP1/IL27RA/HLA-DQB2/HLA-A/SHARPIN/ISG15/TNFRSF4/I  
SS/CTTN/MRPL12/STMN3/MRPS34/TRMT112/VIL1/CHMP3/GSK3A/DENR/WDR45B/MAP1LC3B/DVL2/  
4L/RRP7BP/TSR3/UTP11/LAS1L/SNRPG/MRPL10/CUL4B/UTP4/MYBBP1A/RPL38/MAPT/PRPF31/RP  
ITGB5/CORO1C/BIN1/CORO7/PALLD/F2RL1/ARPC2/MYO19/GAS7/ARHGEF19/PPP1R9B/TIGD5/ARPC  
F80/GORAB/ODF2/PTPN23/PARVG/TACSTD2/CROCC/CAPZB/FGD6/RALA/CDC42/TGFB3/ZMYND8/FH  
RPC2/GAS7/ARHGEF19/PPP1R9B/TIGD5/ARPC3/WIPF1/LIMCH1/PDLIM3/SH2B2/CORO1B/ABLIM2/I  
H12A/PSME3/SNX10/BCL3/LAG3/NCKAP1L/JAG2/ADAM8/PRR7/PIP4K2A/EVI2B/CDKN2B/PIK3CD/I  
/MYL9/HOXA5/THRA/VEGFA/ACTN1/LBR/SMAP1/TLR2/TMEM64/WDR5/NKAP/SRF/INHA/RBPJ/BPGM,  
/EFNB1/SERPINE1/CD3E/PPP2R1A/PAK1/SASH3/ADGRG1/PRKX/LAMA5/THY1/CORO1C/UBASH3B/S  
ID/ANAPC7/CDK2/KIF14/SPSB1/SNF8/CLN3/AXIN1/OAZ3/PMAIP1/ADRM1/CCDC22/MYLIP/PSMB4,  
AMC2/P2RY6/SERPINE1/IL27RA/PAK1/TMIGD3/GNA12/ADGRG1/PRKX/LAMA5/SPRED1/RAP2B/ZNF  
3E/MAP1S/MICALL1/PAK1/CRABP2/ANKRD27/NRCAM/THY1/RTN4RL2/PALLD/HSP90AB1/EPHB6/I

/KDM1A/LYN/FKBP4/RAC1/ITGA2/MYLIP/MIEN1/RAP2A/CDK5/CTTN/SPOCK1/RNF157/HOMER1/WAS/CDK5/WFS1/RNF26/UBE2L3/CBX4/PSMB8/RNF187/RNF157/PSMB10/PSMA5/DNAJB2/ASB6/PSMD13, P2/MIF/FKBP1A/MTCL1/MSN/PKDCC/IQGAP1/CARD10/EFNA5/CD2/HIF1A/MAPK3/HSPA8/OAZ1/LC10/CCT4/SNX10/BCAP31/TOMM5/UBE2J2/BCL3/RPL17/FERMT1/NPEPPS/EHD1/CD68/RPLP2/LAMP3, FCHSD1/CHAF1A/SMARCA4/NOL3/BIN1/COR07/CCT2/EIF2S2/HSP90AB1/ARPC2/DYNC1H1/TICRR/ITG9/LSM7/RPSA/KPNB1/SLC11A1/RNASE2/SSB/LDHA/PDE9A/RPS5/PSMB4/PFKM/APOBEC3G/RPS21, ITDRKH/MYBL1/GTF3C2/POLR2K/KTI12/DDX54/ZBTB80S/RPS19/NOC4L/RRP7BP/GTF3C1/TSR3/UTL1/HSP90AB1/F2RL1/PRSS3/DYNLL1/DYNC1H1/ILF2/AMPD3/NPC2/NBEAL2/OLR1/SLC2A5/GPI/PA2F/IQGAP1/SRPX2/MIIP/CARD10/CREB3/HIF1A/RAB25/MAPK3/ITGAX/DUOXA2/LAMC2/TRIM11/P2RY6, FFB1/LYN/ITGB1BP1/RAC1/ITGA2/PLA2G7/MIEN1/IL1B/BCAR1/PDGFA/FAM83H/SPOCK2/MCAM/FGFR4/C1/CBFB/IL1B/IL2RA/NCAPH2/CD47/TNFSF13B/PSMB10/WAS/LCK/PTPN6/CD27/IL12RB1/CYP26I1/HSP90AB1/F2RL1/PRSS3/DYNLL1/DYNC1H1/ILF2/AMPD3/NPC2/NBEAL2/OLR1/SLC2A5/GPI/PA2F/NCKAP1L/SH3KBP1/ADAM8/VLDLR/LYPLA2/CCL2/SHC1/PIK3CD/CXCL9/CXCL3/CXCL13/DEFB1/RPL18/RPS19/RPS6KB2/RPLP0/RPL18/RPL23/RACK1/GADD45GIP1/VIM/MRPL10/TRIM71/TNIP1/DPH7/ITG1/ADAM8/PRR7/ITGB3BP/CCL2/DAPK3/PIK3CD/ATF4/YWHAH/BBC3/PMAIP1/STK17B/LYN/LDHA/CDI15/NPM1/SLC39A10/SLC35F6/BRCA1/BCL2L12/XRCC2/NOL3/LMNA/HSP90AB1/HDAC1/DDIT4/HYO1/ADAM8/PRR7/ITGB3BP/CCL2/DAPK3/PIK3CD/ATF4/YWHAH/BBC3/PMAIP1/STK17B/LYN/LDHA/CDI15/PEA15/NPM1/SLC39A10/SLC35F6/BRCA1/BCL2L12/XRCC2/NOL3/LMNA/HSP90AB1/HDAC1/DDIT4/3QLN4/KCTD5/FOXF2/RNF216/PSMB5/PSMA4/SGTA/PSMD9/RPS27A/FBXW5/PLK3/MAP1A/HSPA5/FIT1/ANKRD27/BRCA1/STX1A/THY1/NSMAF/FCHSD1/COR01C/BMF/HGS/BIN1/F2RL1/ARPC2/DYNLL1/IT3MC4/PLK4/PFN1/WASF1/OXTR/PARP1/PIEZO1/RPS3/CROCC/RALA/STX18/GRB2/FHOD1/CDC42/TNFR1/HDAC1/CCDC86/NUP93/DDX11/NUP205/NUP37/PSMB2/KRT18/PPP1CA/LEF1/NDC1/NELFE/POLR1/DYNLL1/STAT1/PABPC1/CCL13/HDAC1/CCDC86/NUP93/DDX11/NUP205/NUP37/PSMB2/KRT18/PPP1R18/PYG02/MAST2/SLC4A2/PPP2R1A/PHC2/TSPAN8/MMP2/TTL1/CCT2/EIF2S2/DYNLL1/CAD/DPC1/CHMP4C/BRCA1/RBL1/NSMCE2/PCNA/TUBA1A/SFI1/CTDSPL/DYNLL1/DYNC1H1/SPDL1/XRCC3/TIC1/ST/ALOX5/PLEKHO2/MIF/CD300A/CANT1/ZP3/IQGAP1/RAB15/CFD/OLA1/FTH1/STXBP2/PSMD2/ITG1/JPB1/SEC61A1/UNC93B1/CFD/PRKDC/SIGLEC10/IL34/STXBP2/GBP2/PSMD2/TRIM11/HLA-DQB2/ITRAF3/PSMB3/ARRB2/MUC20/TLR5/PSMD4/XRCC6/GPATCH3/PSMD3/PSMD7/RPS19/IKBKG/FADD/BCL2/P6AP1/PPP1R13L/PAK1/CRABP2/SASH3/ISG15/ANKRD27/NRCAM/XRCC2/BIN1/SOCS1/HSP90AB1/IT3ME3/SLC9A3R1/GAS2L1/BLM/MLST8/FBX05/CNOT9/EVI2B/CDKN2B/CCL2/CDK2/NLE1/EHMT2/CDI1/SLC9A3R1/MT3/CCNO/DVL3/DUSP2/BLM/NCKAP1L/MLST8/DBF4/GTPBP4/ADAM8/PAK4/VLDLR/C1/SIRPA/SOCS1/IRF1/F2RL1/CTLA4/CD83/PLA2G2D/PRELID1/LEF1/PDCD1/ZC3H12A/TNIP2/BCL2/KPNB1/SMC4/FANCA/KNSTRN/MTFR2/CDKN1C/AKAP8L/IL1B/NCAPH2/PSMD13/SIRT7/CENPK/DYNCDAPG2/EPHB3/PRELID1/PSMB2/LEF1/IRF7/ZC3H12A/PSME3/SNX10/BCL3/LAG3/NCKAP1L/JAG2/ITG1/UGL1/TULP3/PSMB8/PSMB10/PSMA5/DEAF1/TGFB2/PLXND1/PSMD13/PSMC4/AP2M1/NDRG4/RAB10, /ADAM8/CCL2/PLSCR1/FANCA/HSPH1/CD209/LYN/CARD11/RAC1/CBFB/IL1B/IL2RA/PDGFA/CD47, C/SHC1/SLC7A6/PIK3CD/CXCL9/CXCL3/CXCL13/LYN/CCL28/RAC1/ITGA2/PLA2G7/IL1B/JCHAIN, P1R/MT3/OTUB1/FBX05/NOC2L/TUBB4A/CAPZA1/HDAC2/RAP1GAP2/YWHAH/MKKS/KIF14/FHOD3/C1P3/IQGAP1/SRPX2/MIIP/CARD10/CREB3/HIF1A/RAB25/MAPK3/ITGAX/DUOXA2/LAMC2/P2RY6/SEI1/ITGB1BP1/RAC1/ITGA2/PLA2G7/MIEN1/IL1B/BCAR1/PDGFA/FAM83H/SPOCK2/MCAM/FGFR4/CCL4/ITM1/SPRED1/RBL1/FPR1/RAP2B/THY1/COR01C/UBASH3B/HGS/SOCS1/CKS1B/CCT2/RPS2/HSP90AB1/PRELID1/FGFR1/HIP1R/PSME3/BID/ARFGAP1/TBC1D10B/BCAP31/DVL3/NCKAP1L/FGFR3/PRR7/IT3PSM2/NCKAP1L/MLST8/TUBB4A/CAPZA1/RANGRF/DAPK3/MKKS/ARHGDI1/FHOD3/PHLDB1/CAMSAP2/IM2/TMED9/CSNK1E/MARK2/STX10/PIP5K1C/SLC9A3R1/CEP89/BLOC1S4/DYNLT1/GPSM2/HAUS1/ITL1/CROCC/RIMS3/LLGL1/FHOD1/CDC42/STARD3/IL4R/VPS18/CHMP1A/SYT1/PPFIA3/DNM1L/ACTL2/HDAC1/RELN/CSNK1E/S100B/ZSWIM5/MARK2/GDI1/EPHB3/NUMBL/TPBG/FGFR1/MYRF/MT3/DYN13/LRP8/SRRT/FAIM/CST7/PRKCI/ZMYND8/SEMA4D/SYT1/DNM1L/SYT3/GDPD5/KATNB1/STK25/AR1RD27/NRCAM/THY1/COR01C/XRCC2/RTN4RL2/BIN1/ISL2/ARPC2/HDAC1/RELN/CSNK1E/ZSWIM5/MARK10/EFNA5/STXBP2/HIF1A/MAPK3/ASIC1/OAZ1/LCP1/P2RY6/MAP2K2/DKC1/PAK1/CAPN10/STX1/JBE2Z/AMIGO2/PRKDC/SLC9A1/STIL/CREB3/TNFAIP8/HIF1A/NUPR1/FZD1/SERPINE1/RNF34/PEL1/A/PLEKHM2/TMED9/RELN/ARPC3/NUP93/TBC1D1/STX10/PRELID1/PIP5K1C/PPIA/HIP1R/MYRF/IT

1/URM1/AXIN1/U2AF2/KDM1A/RCE1/BIRC7/MED8/HCF1/ADRM1/CCDC22/CBFB/MYLIP/PSMB4/AC  
1/ATG101/NOP2/FBX05/SPAG1/RSPH1/PIP4K2A/TUBB4A/RPSA/CSNK1D/DNAAF5/CDK2/KRT8/MKK  
5/ZDHC18/RPS21/RPL7/RPL28/MYADM/VIL1/ZDHC1/AP2M1/RAB10/RPL39/TNIK/STAC3/RPL3  
3/OTUB1/MLST8/FBX05/NONO/AUNIP/ATF4/AXIN1/KDM1A/PMAIP1/HSPH1/LYN/WNT7B/BIRC7/K  
RL1/ARPC2/DYNC1H1/GAS7/FMOD/PPP1R9B/ARPC3/WIPF1/PLOD2/LIMCH1/PDLIM3/PLOD3/CORO1  
/CD3E/PAK1/PERP/SASH3/BAIAP2L1/LAMA5/NRCAM/RAP2B/THY1/ITGB5/UBASH3B/SIRPA/CDH6/  
ACSTD2/CROCC/CAPZB/FGD6/RALA/CDC42/TGFB3/ZMYND8/FHDC1/CDC42EP2/OCRL/CETN2/LRRC6  
A/LYN/FKBP4/RAC1/MYLIP/MIEN1/RAP2A/CDK5/CTTN/SPOCK1/RNF157/HOMER1/WAS/PLXND1/VII  
F9/CDKN2B/CCL2/CSNK1D/ANAPC7/CDK2/LSM10/KIF14/DCTN2/CDKN1C/PSMB4/PSMB8/PSMB10/P  
/RCC1/GTSE1/SPAG5/MAPRE1/TUBB/EZH2/CDC25A/CDK4/MAD2L1/MUC1/EME1/CDKN2D/ZNF385A/  
/ZNF675/DPF2/BTN2A2/CCL3/MEIS2/PSMD8/RARG/ABL1/SART1/HLA-DOA/FCGR2B/PSMA1/TOX/P  
AIP1/CCT7/ITGB1BP1/AKAP8L/IL1B/ACTB/CDK5/TXN/UBE2L3/TCP1/VIL1/GSK3A/AP2M1/STAC3,  
RD10/CREB3/HIF1A/RAB25/MAPK3/ITGAX/DUOXA2/LAMC2/P2RY6/SERPINE1/IL27RA/PAK1/TMIG  
AC1/ITGA2/PLA2G7/MIEN1/IL1B/BCAR1/PDGFA/FAM83H/SPOCK2/MCAM/FGR/CCL4/MYADM/TGFB2,  
/SF3B3/HNRNPR/POLR2D/SART3/DHX15/TGS1/GPKOW/KHDRBS3/DHX9/RBM10/USP39/SNRNP25/RB  
/SF3B3/HNRNPR/POLR2D/SART3/DHX15/TGS1/GPKOW/KHDRBS3/DHX9/RBM10/USP39/SNRNP25/RB  
/SF3B3/HNRNPR/POLR2D/SART3/DHX15/TGS1/GPKOW/KHDRBS3/DHX9/RBM10/USP39/SNRNP25/RB  
/BAD/PSMA4/VCAM1/PSMD9/THBS1/ADAM17/USF1/CHCHD2/NOTCH1/RPS27A/CAPN2/MTHFR/PLK3/  
HK3/CCT2/CD58/C3AR1/HSP90AB1/F2RL1/PRSS3/DYNLL1/DYNC1H1/ILF2/AMPD3/NPC2/NBEAL2/  
11/RAC1/CBFB/IL1B/IL2RA/CD47/NFAM1/TNFSF13B/FGR/CD300LF/LCK/PTPN6/CD27/SAMSN1/  
IK3CD/PLSCR1/CD209/LYN/HLA-DRB5/CARD11/FPR3/MUC3A/RAC1/CBFB/PSMB4/ACTB/BCAR1/C  
RT1/SYMPK/PHF5A/SCAF1/SRPK1/RBM42/CPSF3/DDX23/PTBP1/PRKRIP1/PRPF38A/WTAP/HNRNPU,  
IF5A/POLR2D/PRKAG1/ANP32A/ANP32B/DHX9/TNPO1/DMAPI/ IPO9/NXT2/CCHCR1/RBM15B/KPNA6,  
AP3D1/FADD/PELI1/TNIP1/RASAL3/BTN2A2/HSPD1/SART1/FCGR2B/CSK/BAD/BCL10/VCAM1/TWSC  
2/ARHGDI1B/KIF14/KPNB1/RAB20/LYN/RAC1/KCTD10/RAP2A/GNB1/STMN3/MAPK11/NRAS/WAS/T  
RT/SAMD4B/PSMB3/NCL/HENMT1/EIF3H/POLR2L/NUP155/DROSHA/AGO2/CALR/APP/NUP107/PSMD  
/PSMD4/PCGF2/PSMD3/RBX1/PSMD7/RAD21/BABAM1/MTBP/RPL23/NME6/RFWD3/RBBP7/RPA2/E2F  
/SCN1B/SEMA3C/PMP22/PTPRF/SEMA3E/MAPT/CHN1/CBFA2T2/ABL1/STK24/STMN2/RASAL1/SFRP  
3/OL4A2/LAMB3/MATN3/APP/DNAJB6/COL8A2/PRDX4/MMP19/ITGB8/RIC8A/EMILIN1/COL11A1/ABI  
R1/PDGFA/FAM83H/MCAM/FGR/CCL4/MYADM/TGFB2/GPSM3/F3/FAM89B/VIL1/MAZ/CCR1/CXCL16/I  
MRPL37/EIF5A/DSTN/PLEKHH2/MRPL27/MRPL28/GAK/MRPL51/MRPL11/MTPN/SPTAN1/MRPL15/C1  
1/PIH1D1/MECP2/HNRNPA1/UBR5/TWIST1/PPHLN1/NEK6/MLLT6/SART3/DNMT3B/MAPKAPK5/BECN  
3/AP18/NCLN/CDC42EP2/MED25/DNM1L/RBX1/GMFG/DR1/RNF4/ABI2/CLEC7A/RACK1/RALB/RPA2/  
3/CCT2/CD58/C3AR1/HSP90AB1/F2RL1/PRSS3/DYNLL1/DYNC1H1/ILF2/AMPD3/NPC2/NBEAL2/O  
/DYNC1H1/ILF2/AMPD3/NPC2/NBEAL2/OLR1/SLC2A5/GPI/PA2G4/SERPINB1/PPIA/RAB24/ACLY/I  
NSMCE2/PCNA/TUBA1A/SFI1/CTDSPL/DYNLL1/DYNC1H1/SPDL1/XRCC3/TICRR/KNTC1/PPP1R9B/E  
35/RAD21/MTBP/RPL23/MSX1/CUL4B/MYBBP1A/WNT4/DBF4B/MEIS2/RAD51C/BTG2/PIDD1/LFNG/I  
RNP1A/UBR5/EIF5A/POLR2D/PRKAG1/ANP32A/ANP32B/DHX9/TNPO1/DMAPI/ IPO9/NXT2/CCHCR1/I  
/RBBP8/CHMP4C/RBL1/NSMCE2/TUBA1A/SGO1/CKS1B/YBX1/PELO/DYNC1H1/SPDL1/MYO19/TGFA/I  
/PSMD10/CDKN2C/C5AR1/CDK7/CCND2/RPS3/TFAP4/MTCP1/TGFB3/MUC20/ADRA2A/SPRY4/TELO2,  
/KRT8/YWHAH/BBC3/NLE1/KDM1A/PMAIP1/IL1B/WFS1/CTTN/TGFB2/TAF9/ZNF205/SFPQ/LCK/CD  
2/ARPC1A/WNT4/NF2/EMILIN1/BRK1/ARPC5/ABL1/TBCD/STMN2/ACTR3/ARAP1/DBNL/PTGER4/SP  
RNP1A/PSMC3/EXOSC1/HNRNPL/HNRNPR/SART3/ANP32A/KHDRBS3/DHX9/TNPO1/PSMC5/RBM10/MI  
3/PDCD10/STAC/BAD/CENPQ/PRKAA2/CASP8/PLK3/BICD1/SH3GLB1/MAP1A/MAVS/MARK4/CD2AP/I  
T20/CLTC/STXBP1/GAK  
4/CDKN1C/AKAP8L/IL1B/NCAPH2/PSMD13/SIRT7/CENPK/DYNC1LI1/DSN1/ANAPC11/CYP26B1/TUI  
SMD1/C5AR1/PSMA7/RPS3/PRKD2/PSMB3/GRB2/CDC42/MUC20/CMKLR1/PSMD4/PSMD3/PSMD7/LILI  
/IM/TRIM71/PLEKHN1/RPL38/HNRNPM/RPL23A/EXOSC3/BTG2/PSMD8/DNA2/GSPT2/PSMA1/RPS7/I  
/RPL7A/RPS23/MYEF2/RPS10/PSMB5/PSMA4/RPS15/PSMD9/RPS16/RPL5/RPS27A/HNRNPU/RPS12,  
11/CDC42/ARHGAP18/PRKCI/TGFB3/FHDC1/SWAP70/CDC42EP2/GMFG/ABI2/WDR1/ARPC1A/WNT4/I  
T/CKAP2/NAT10/SLC25A5/TBCD/STMN2/ARAP1/TBC1D7/RAD1/DNM2/STYXL1/ODF2L/NBN/HNRNPI



2RB1/IL15/PIEZ01/PTPN23/RPS3/GRB2/CD6/CDC42/IL4R/PNP/SWAP70/MAPK7/LILRB4/AP3D1/IT  
TYXL1/FIG4/MOB2/LLPH/VEGFA/MARK4/HSPA5/DDX56/DEF8/RAB11A/CENPJ/PACIN1/PPP2R5B/1  
3MA4F/GMFG/SCTR/SEMA5B/AKT1S1/ABI2/WDR1/SEMA3C/SEMA3E/MAPT/ARPC1A/BRK1/CDHR2/RAI  
7/RPL5/DUS2/NOL6/RPF2/CTU2/BMT2/POP5/NVL/EXOSC9/EXOSC10/EXOSC7/DDX56/INTS9/PIH1  
IL/PSMA1/PSMB5/BAD/PSMA4/VCAM1/PSMD9/THBS1/ADAM17/USF1/CHCHD2/NOTCH1/RPS27A/CAP  
21/TRIM25/HPGDS/SUPT5H/CCL3/TNFAIP3/SRPK1/RNF216/BAD/ACVR1B/NOTCH1/MAVS/OPTN/OA  
VF335/HSPD1/SART1/TOX/CSK/VAMP8/BAD/BCL10/VCAM1/THBS1/CD177/PAK2/HLA-F/NKAP/RHO  
A2/WRAP53/UBQLN4/CHEK2/HSP90AA1/HDAC10/SPIRE1/MBD3/NBN/MAGEF1/HNRNPU/NVL/ERCC1/I  
3B1/LST1/IL15/MSH2/RPS3/SIT1/GRB2/CD6/DROSHA/CDC42/KAT2A/IL4R/PNP/GAL/LILRB4/AP  
/ZNF675/IL20RA/RPA2/CCT8/GNL3/POLD3/PIWIL4/RAD51C/IQCB1/PTGES3/NAT10/RAB3D/DNA2,  
FBL2/ATP6VOD1/PLEKHN1/LONP1/SUV39H2/PSMD8/VHL/PSMA1/PSMB5/BAD/PSMA4/VCAM1/PSMD9,  
3RP1/RPS12/TOMM22/RPS4X/RPL6/OPTN/RPL37/RPL27A/GGA3/HSPA5/RPL36/RILPL1/UBA52/RAI  
VAPC7/CDK2/LSM10/KIF14/DCTN2/CDKN1C/PSMB4/PSMB8/PSMB10/PSMA5/PTPN6/PSMD13/PSMC4,  
VM1L/MAPK7/PDCD5/FADD/STX4/RACK1/MSX1/RAD9A/IL20RA/PTTG1IP/WNT4/PELI3/GRINA/ACVI  
ART1/TOX/CSK/VAMP8/BAD/BCL10/VCAM1/THBS1/CD177/PAK2/HLA-F/NKAP/RHOA/CD38/AP3B1/3  
/ZPR1/STOML2/RBM14/RFC5/DHX9/DNAJC2/FAF1/POLE3/RPA1/EREG/CDC34/SMARCAL1/MSH6/AT  
2/KLHDC8B/RPS3/CDC42/ZNF207/CHMP1A/RAD21/KATNB1/CENPN/NDE1/NTMT1/ESCO2/RAD51C/SI  
D7/RAD21/MTBP/NME6/RFWD3/GADD45GIP1/NABP1/RAD9A/RPA2/NAE1/ZWILCH/BTN2A2/BTG2/PSI  
3CGR2B/CSK/BAD/BCL10/VCAM1/TWSG1/PTPN2  
3CP2/CENPJ/CDK5R1/ARHGAP28/RHOA/MTPN/NIN/SPTAN1/ARF1/RHOBTB2/GMFB/HAX1/CAMSAP1/I

1IP1/EXOSC7/DDX56/PIH1D1/UTP20/EXOSC1/NOB1/NSUN4/DDX10/MTERF3/WDR75/MRPL11/FAM  
CAM1/SLC8B1/THBS1/ADAM17/NOTCH1

/MORF4L1/TP53BP1/ATAD5/THOC1/DCLRE1C/PAGR1/MMS22L/PTPRC  
IF3A/LRPPRC/KIF5B/DYNC2LI1/ARL3/TRIM46/TUB/TTC21A/ARL8A/CNIH2/KIF9/BBS12/TRAK2/I  
3F1/SRSF2/CASC3/FIP1L1/RBM8A/MAGOHB/MYO1C/SMG7/LRPPRC/POLDIP3/THOC7/AAAS/SLC25A  
R75/FAM207A/BMS1/NOL10/RSL1D1/DIMT1/EBNA1BP2/NOL9/UTP23/RPP30/SUV39H1/PELP1/RPS  
R2B/FXR1/ASF1A/EIF4G1/CNOT2/HNRNPA2B1/KMT2B/MBD1/SMAD2/ELAVL1/ZMPSTE24/NUP214/SI  
C1/DHX38/ENY2/PABPN1/SRSF1/SRSF2/CASC3/FIP1L1/RBM8A/CEP72/MAGOHB/KIF3A/SMG7/POLI  
D19/POU2F2/GON4L/PRKCB/VAV3/PPP2R3C/SLA2/NOD2/TNFSF13  
D51C/PSMD8/HSPA2/PK1A/PSMA1/MTA3/CHEK2/CLSPN/CEP41/PSMB5/PSMA4/HSP90AA1/PSMD9/DI  
RSF14/RUNX3/ZMIZ1/CCL19/XCL1/PIK3R6/CD5/CAV1/TP53BP1/ATAD5/INPP5D  
KND12/IVNS1ABP/BCL2L1/PPM1F/NDUFA13/PLAGL2/GSKIP/IFI6/CCAR2/BECN1/EPHA2/MSH6/PI

DP1/DAB2IP/HMGA2/RPTOR  
CGR2B/PSMA1/VAMP8/PSMB5/PSMA4/PSMD9/DNM2/THBS1/DCTN1/CANX/HLA-F/AP2A2/DYNC1I2/K  
3FSWAP/EIF3G/ATR/RPS14/RPS27/EIF2D/GEMIN2/SRSF1/SRPK2/COIL/DHX30/SNRPD3/CEL2/N  
/ERCC3/STUB1/BIK/DDB1/MYO1C/SPIRE2/NCKAP1  
IP2B4/PPAT/HINFP/CNOT10/STXB4/POLE3/RPA1/CDC34/CNOT3/TFDP1/UBE2E2/CACUL1/POLE2,

/RPS17/PPP2R3C/BAP1/RAC3/RASSF2  
3E2N/CD247/INPP5D/DUSP22/CD3G/PTPRC/NECTIN2/BTN2A1/PIK3CB/PSMB1/PLCG1/EIF2B4/MAI

NK2B/TP53RK/CDK5R1/NUAK1/TWIST1/RFC5/PRKAG1/MAPKAPK5/CNOT10/RPA1/BRPF1/TAF13/TBI  
NPU/GLI1/RAB11A/CRLF3/KIF20B/MECP2/CENPJ/PPP2R5B/CDK5R1/RHOA/FAP/CNOT10/STXB4/I  
NB1/MTBP/WRAP73/NME6

2A1/CDC34/CNOT3/TFDP1/UBE2E2/CACUL1/POLE2

3/CHEK2/CLSPN/CEP41/PSMB5/PSMA4/HSP90AA1/PSMD9/DNM2/DCTN1/CEP164/HAUS7/NBN/PLK3,

12/NELFCD/RPS14/GTF2F1/RPS27/RPL29/EIF2D/CTDP1/RPL13/RPL4/RPL41/RPL9/RPS6/TRIM3,

214/TSC1/BICD2/IWS1/ATXN2/RFTN1/DDX19A/TPR/SRSF7/MCM3AP/NUP50

214/TSC1/BICD2/IWS1/ATXN2/RFTN1/DDX19A/TPR/SRSF7/MCM3AP/NUP50

/ANP32B/DHX9/SMARCA5/GTF2H1/POLE3/RPA1/SMARCA1/IPO4/SMC2/HMGA2/PARP10/GRWD1

36/STRAP/SFSWAP/EIF3G/ATR/RPS14/RPS27/EIF2D/KLC1/GEMIN2/SRSF1/SRPK2/COIL/DHX8/DI

PREX1/ARFGEF1/ADD1/ASAP3/MYO1C/SPIRE2/NCKAP1/PPP1R9A/LPAR1/PXN

3/CDK2AP2/NBN/PLK3/ZFYVE19

/DHX38/EXOSC2/ENY2/PABPN1/SRSF1/SRSF2/CASC3/FIP1L1/RBM8A/MAGOH/ MYO1C/SMG7/LRPPI

319

3P1/HMGA2/THOC1/FBX06

/SMG7/RPL9/RPS6/RPL24/RPL11/RPL10/RPS24/DCP2/PYM1/RPS3A/AGO1/RPL14/RPL10A/EIF4G,

/RPS27/EXOSC2/DDX52/TEX10/RPS6/RPF1/MRM2/CHD7/RIOK1/RPL11/RPS24/WDR12/PDCD11/USI

3ACS/LMAN2L/PPIC/SNRNP70/HSPB6/P4HB

PS6/RPL24/RPL11/RPL10/RPS24/RPS3A/ZDHHC20/RPL14/DMTN/RAB3IP/SRP19/RPL10A/RPL12/;

1

3ITM2/DDB1/P4HB/MX1/TRIM32/VAPA/TBC1D20/ADAR/TRIM27/IGF2R/SETDB1/TRIM62/POLR2B/;

PT/ASF1A/TERF1/SUPT6H/ERCC2/NAP1L3/BRF2/GTF3C3/SUPT16H/TP53/TBPL1/TAF11/GTF2E1

7/NBN/ZFYVE19/HAUS5/UIMC1/DYNC1I2/RAB11A/GPR132/NEDD1/MECP2/CENPJ/PSMC3

1I2/RAB11A/GPR132/NEDD1/MECP2/CENPJ/PSMC3

3MB6/PSMA3/PDE4B/EIF2B1/CD4/RELA/PSMB7/PRAM1/SKP1/EIF2B2/PIK3R2/WNK1/BTN3A2/EIF;

/PTPN14/NUP214/TSC1/TP53/STRADA/IWS1/DDX19A/TPR/SRSF7/MCM3AP/NUP50/EIF4ENIF1

/PNPT1/NUP214/TSC1/BICD2/IWS1/ATXN2/RFTN1/DDX19A/TPR/SRSF7/MCM3AP/NUP50

31/PSMB7/ELAVL1/FASTKD1/PNPT1/SERBP1/NUP214/TNFSF13/PAIP1

3RPL24/RPL11/RPL10/KLHL25/RPS24/EIF4E2/EIF3F/RPS3A/EIF2B1/RPL14/EIF5B/RPL10A/EIF;

12/DYNC1I2/KIF22/PSMC3/CLTC/TAPBP/AP1S1/AP1S3/TAP2/AP1S2/AP2B1/LGMN/PSMC5/AP2A1,

AP1S3/TAP2/AP1S2/AP2B1/LGMN/PSMC5/AP2A1/ARF1/PDIA3

ΓAPBP/AP1S1/AP1S3/TAP2/AP1S2/AP2B1/LGMN/PSMC5/AP2A1/ARF1/PDIA3/ACTR1A/KLC1/CD1A,  
l/VPS33B/HAUS2/CDK5RAP2/RAB7A/ESYT1/EXOC6/UNC13A/CEP135/PEX16/EXOC6B/STX16/HAUS:

)/PPP3CB/PSMD12/NFATC1/ABI1/MAPK9/TAB1/PIGR/RAP1A/PSME2

JP214/TNFSF13/PAIP1/TARDBP/APEX1/PARN

l/RPL13/RPL4/RPL41/RPL9/RPS6/TRIM32/RPL24/RPL11/RPL10/RPS24/TRIM27/AAAS/RPS3A/TI  
p/PSMD6/ILK/ZEB2/PSMC2/PSMA6/XIAP/ATP6V1C2/HHEX/YAP1/LRRK1/PRDM15/PSMD5

l/TARDBP/APEX1/PARN









RALA/GRB2/CDC42/CDC42SE2/ADRA2A/CDC42EP2/MY09B/SPRY4/CBL/RALGDS/ABI2/RALB/ARHGD  
2/VEGFA/HSF4/UIMC1/SREBF1/WDR5/PIH1D1/MORF4L2/TRIM37/MECP2/UBR5/PPM1F/BAZ2A/TW  
NBP1/SEMA4D/XCL2/AGAP1/CDC42EP2/MY09B/OCRL/DNM1L/PGAM5/RACK1/ARHGDIA/RIC8A/RGS3,  
3LN/MARK2/CEP85/NCAPG2/FGFR1/SLC9A3R1/MT3/CCNO/DVL3/DUSP2/BLM/NCKAP1L/MLST8/DBF  
/DVL3/VLDLR/CPNE1/HEYL/HDAC2/RAP1GAP2/CSNK1D/YWHAH/CAMSAP2/KDM1A/JAG1/LYN/GPRC5I  
IA/SCN1B/MAPT/TGIF2/RHEB/CCL3/PRPF19/ZNF335/CBFA2T2/STMN2/RASAL1/DBNL/PLXNC1/ST  
00A/ZP3/HLA-DPB1/ARPC4/UNC93B1/CFD/PRKDC/STXBP2/MAD2L2/PSMD2/MAPK3/CD276/JAML/II  
7/GPRC5B/IL1B/CDK5/PDGFA/TXN/MLKL/UBE2L3/TCP1/ADRA2C/FGR/LCP2/MAPK11/TGFB2/CALC  
T2/MUC6/BCAN/B4GALT4/ACAN/MUC15/GFPT1/TMEM115/CHST3/POMGNT2/SLC35C2/FUT11/XXYLT  
/ATR/HMGA2/RPTOR/MKNK1/PKD1/CSNK2A2/VRK2/PWP1/BDKRB2/CSNK1G1/STK4/UCN/PARK7/ULK  
7A/TNIP1/POLR3D/LBP/POLR3C/HSPD1/PSMD8/PSMA1/TNFAIP3/MAPKAPK3/PSMB5/BCL10/PSMA4,  
TAF10/LFNG/DOT1L/ABL1/SYMPK/NFATC4/TDG/TMC8/BAG2/SPPL3/NVL/CTBP2/TRAF4/CSNK2B/H

S27A/MAVS/DMBT1/PAK2/TLR2/MUC6/UBA52/MUC15/PSMC3/UBE2D2/RBM14/MAP3K1/LGMN/PSMC5,  
DHX9/IFITM3/BECN1/CCL19/XCL1/TLR7/ARF1/PRKRA/CCDC130/ATG7/CCL8/HMGA2/GTF2F1/ZC3I

/ADAR/TRIM27/IGF2R/SETDB1/TRIM62/POLR2B/CD4/APOBEC3F  
5/HDAC3/BAP1/SMAD3/TP53/TARDBP/FEZ1





A7/RUVBL2/PSMB3/SDHAF2/ARRB2/CDC42/APCDD1/AGO2/CTDNEP1/APP/PSMD4/TRPM4/PSMD3/RB  
 3MD3/RBX1/PSMD7/TMUB2/TBL1XR1/PELI1/CBL/SGTB/RPL23/RNF4/UBE2L6/RACK1/RNF7/CUL4B  
 3MC4/GSK3A/AP2M1/OSBPL7/PML/ANAPC11/VPS28/AP2S1/UBE2D1/USP14/PSMD10/PSMD11/PSMD  
 1PT/CYCS/NDUFS5/LONP1/TAZ/NDUFB9/SSBP1/HSPD1/DNA2/RHOT2/SLC25A5/TIMM13/MFF/OPA3  
 14/NF2/BRK1/ARPC5/ABL1/ACTR3/ARAP1/DBNL/PTGER4/SPIRE1/ADD3/LIMA1/CD2AP/CDK5R1/AI  
 30/IL15/PIEZ01/IBSP/PTPN23/RPS3/PRKD2/GRB2/CD6/CDC42/IL4R/CALR/PNP/RELL2/LILRB4  
 3WP1/BDKRB2/CSNK1G1/STK4/UCN/PARK7/ULK1/DMTN/DYRK3/IFNG/NSD1/TLK2/EIF4G1/PRKCB/I  
 32D2/MAP3K1/LGMN/PSMC5/UBE2N/TLR7/HSP90B1/IRAK2/CAV1/DAB2IP/CLEC4E/ZCCHC3/NFKB1  
 31/IRF4/MYC/BGLAP/CD4/IFNG/ANXA1/CCR2/PPP2R3C/ESRRA/RASSF2/LILRB1/GNAS/CD80/SOX  
 3NG/ANXA1/CCR2/TSC1/RPL22/FUT7/CD80/TP53/SOX13/RASGRP1/FGL2/LILRB2  
 3MRPL20/DMTN/MRPL24/MRPS16/MRPL55/CHCHD1/MRPS2/CARMIL2/SLN/MRPL21/MRPS26/MRPS11

5B/MRPL13/GCN1/CDC123/EIF4A3/ILF3/GPX1/GRB7/ZNF706/RPS3/SAMD4B/RPL27/NCL/BAG3/E  
3XW9/SOCS3/ANAPC11/VPS28/UBE2D1/RNF220/UBA1/PSMD10/RNF113A/PSMD11/PSMD1/DCAF16/I  
SMD3/RBX1/PSMD7/TMUB2/TBL1XR1/PELI1/CBL/SGTB/RPL23/RNF4/UBE2L6/RACK1/RNF7/CUL4B,  
MD1/MVB12A/PTPN23/GPX1/PSMA7/UBE2E1/FBXL6/USP1/DNAJC10/PSMB3/UBE2A/SMARCC1/ARRB  
V23/PSMA7/RUVBL2/PSMB3/SDHAF2/ARRB2/CDC42/APCDD1/AGO2/CTDNEP1/APP/PSMD4/TRPM4/P  
/CHPF2/NUP93/MAN1B1/NUP205/NUP37/PLOD3/DDIT4/B4GALT3/GPI/B3GALNT1/NDC1/ST3GAL4/5  
)/MAPK3/NUPR1/RRAGC/P2RY6/CD3E/MAP2K2/UBE2I/ATP6AP1/SHARPIN/PAK1/ADGRG1/PEA15/F  
ACOT8/B4GALNT2/NECAB3/DAD1/POFUT2/FUT8/GALNT7/MAN2B1/ALG1/LARGE2/GXYLT2/HEXB/GNI  
D10/BIN2/PSAP/LEMD2/HOOK2/SGTA/DNM2/DCTN1/COG1/UGCG/SRGN/PLK3/SH3GLB1/OPTN/RAB  
M21/UBA52/RAB29/TARBP2/VPS37B/CXCR6/PIIE/PIIB/TNFRSF14/IFITM3/EPHA2/IST1/KPNA6/C  
7/RHOA/INHA/AP3B1/DOCK2/RUNX3/ZMIZ1/LYL1/RBPJ/CCL19/NOTCH2/PIK3R6/DOCK10/ATP7A/I  
)CH/UBE2D1/IL15/PSMD10/PSMD11/PSMD1/PSMA7/TRAF3/PSMB3/ARRB2/CD6/MUC20/TLR5/PSMD  
L/CENPJ/TMEM138/CC2D2A/YWHAG/IFT20/B9D1/FNBP1L/TNPO1/IFT22/TTLL3/SSX2IP/NPHP4/H  
L/SIX1/AP2B1/LGMN  
4/GMFG/ABI2/ARHGDIA/WDR1/SEMA3E/ARPC1A/WNT4/NF2/BRK1/ARPC5/ABL1/ACTR3/ARAP1/DBN  
L/CENPJ/TMEM138/CC2D2A/YWHAG/IFT20/B9D1/FNBP1L/TNPO1/IFT22/TTLL3/SSX2IP/NPHP4/H

5MA4/VCAM1/PSMD9/TNFSF15/PTPN2/THBS1/ADAM17/CASP8/TXNDC17  
MAP3K7/TRIM32/NFKBID/VAPA/ATP2C1/CC2D1A/RHOH/SHISA5/TRIM62/CD4/BRD4/RELA/TFG/NOI

3X1/PSMD7/TMUB2/TBL1XR1/PELI1/CBL/SGTB/RPL23/RNF4/UBE2L6/RACK1/RNF7/CUL4B/TRIM7  
I/OAZ3/FANCA/CCT7/TESK1/RPL10L/ADGRG2/DAZAP1/KDM5B/NCAPH2/TCP1/ETV6/DEAF1/POC1A,  
PH1/SCMH1/HDAC2/MKKS/ZFP41/DEFB1/OAZ3/FANCA/TESK1/RPL10L/ADGRG2/DAZAP1/NCAPH2/E  
PH1/SCMH1/HDAC2/MKKS/ZFP41/DEFB1/OAZ3/FANCA/TESK1/RPL10L/ADGRG2/DAZAP1/NCAPH2/E  
VC1/C12orf4/TCTEX1D2/PTPN1/PLK3/SH3GLB1/MAVS/BNIP3L/RAB3A/SREBF1/EDEM2/ZPR1/RAB:

MAP3K1/GPS1/MAPKAPK5/ADORA2B/UBE2N/KITLG/KSR1/CCL19/PIK3R6/IRAK2/DUSP18/EGF/MAPK2/UBR5/PORCN/PSMC3/STK3/GSKIP/RAPGEF1/IFT20/PSMC5/RBPJ/CCAR2/NPHP4/TLE6/KLHL12/IL3AG3/IL4R/TGFB3/HK1/GZMB/DNM1L/TRPM4/PDCD5/STX4/RACK1/CLEC5A/HCAR2/CCT8/ABCG1/CAC/STX4/TLE6/KLHL12/EGF/CAV1/DAB2IP/DKKL1/ZBED2/BMP2/PSMB1/WWTR1/PIN1/CSNK1G1/STK4/KREI/JMJD8/MUL1/SLC20A1/NOD2/PLEKHG5/IKBKB/DDX1/MAPKBP1/MIB2/MTDH/CASP10/TICAM1/WNT3

/ENPP2/TNFRSF14/HBEGF/SH3BP5L/EPHA2/KITLG/EREG/CRLF1/OSM/HAX1/EGF/CAV1/TMEM102/1  
P2R5B/ENPP2/TNFRSF14/HBEGF/SH3BP5L/EPHA2/KITLG/EREG/CRLF1/OSM/HAX1/EGF/CAV1/TMI  
l/TNFAIP3/TRADD/PSMB5/PSMA4/VCAM1/PSMD9/TNFSF15/PTPN2/THBS1/ADAM17/CASP8/TXNDC1'

3/MAP2K2/CENPE/ATP6AP1/PAK1/PEA15/FGFR4/FPR1/RAP2B/SOCS1/CKS1B/HSP90AB1/F2RL1/T  
LIMS1/TBCD/NPRL3/RASAL1/SIPA1/ARAP1/TBC1D7/SGSM3/ARHGAP11A/SRGAP2/RGP1/TBC1D22B,  
4L1/SPOUT1/PCGF3/MORC2/MIR155HG/HDAC5/PABPC1L/TAF1B/METTL3/PPARG/MYO1C/MOV10/PPI





RT1/EPHB3/DDIT4/SH2B2/POLR2H/FGFR1/HIP1R/SLC9A3R1/NCBP2/MT3/ACTG1/NCKAP1L/FGFR3,  
MYCBP/GOLGA3/MCM8/VCX/IL4R/CALR/CTDNEP1/TDRKH/HSF2/MYBL1/CETN2/TMEM119/TESMIN/A  
P4/DBNDD2/IL1B/GBA/PIAS3/CDK5/CHORDC1/PHB/MYADM/PTPN6/SAMSN1/SOCS3/VPS28/INPP5J,  
IP3/NFATC4/PSMB5/PSMA4/PSMD9/CSNK2A1/VPS35/NOTCH1/SFRP4/TLR2/TMEM64/GLI1/MESP1/I  
AR/BECN1/SNAPIN/VPS33A/MFN1/ATG7/HTT/RPTOR/ATP6V1B2/CSNK2A2/LARP1/VPS4A/RAB1A/K

RIPAP1/CHMP4A/CLEC16A/VTA1/ARHGAP44/STX16/SNX6/SNX2/EHD3/INPP5F/DENND2A/GBF1/CHI  
INCRIP

FR4/FPR1/RAP2B/SOCS1/CKS1B/HSP90AB1/F2RL1/TGFA/CCL13/TNFRSF11A/RELN/LIMCH1/MARK:  
/TGFB3/MUC20/ADRA2A/XRCC6/TELO2/MAP3K6/IKBK/STK25/RALB/CSPG4/DBF4B/CEMIP/TRAF7,  
PT/PSMB1/ASXL1/USP3/MAP3K7/STAM/PSMB6/COPS8/PSMA3/PARK7/EIF3F/USP36/MYC/PSMB7/S

Γ/FAIM/CDC42/CALR/PRKCI/ZMYND8/SEMA4D/SYT1/DNM1L/SYT3/GDPD5/KATNB1/STK25/CLEC7A,  
2A/CDK5/CTTN/RNF157/PLXND1/VIL1/RAB10/C12orf57/TNIK/TUBB2B/FGFR2/DVL2/WASF1/NSM  
3B2B/DVL2/INPP5J/NSMF/LRP8/DGUOK/SEMA4B/CALR/PRKCI/PRRX1/ZMYND8/SEMA4D/SYT1/APP,  
K5/CTTN/RNF157/PLXND1/VIL1/RAB10/C12orf57/TNIK/TUBB2B/FGFR2/DVL2/WASF1/NSMF/NE  
/THY1/SPON2/THEMIS2/IRF1/IRF3/C3AR1/HSP90AB1/F2RL1/ARPC2/RAB7B/LRRC14/CTLA4/ARPC  
P1/DHX9/MAPKAPK5/COA3/MTPN/CNOT10/MEX3D/RBM24/DPH3/EIF6/EIF4G2/EIF4G3/CNOT3/RP  
/GPX1/RPS3/TFAP4/CST7/ARRB2/SPINK4/APP/DNAJB6/DPEP1/CTSD/HSPE1/CARD16/PDCD5/FADI  
)/TLR5/GPATCH3/RPS19/FADD/CLEC7A/ROMO1/TRIM25/POLR3D/LBP/POLR3H/POLR3C/S100A7/TI  
L/SIPA1/TMC8/DBNL/ACVR1B/DNM2/ADAM17/CSNK2A1/CCDC85B/NPPB/ARHGEF11/VEGFA/EXOSC9,  
ζ7/STAM/PSMB6/PSMA3/PARK7/EIF3F/USP36/MYC/PSMB7/STAMBPL1/SMAD2/BAP1/SMAD3/USP33,

3/P2RY6/SERPINE1/MICALL1/PAK1/CD63/SLC39A10/STX1A/SLC12A8/GULP1/CORO1C/SIRPA/RAI  
ARHGAP18/CALR/CDC42SE2/SEMA4D/SYT1/CDC42EP2/DNM1L/SYT3/SEMA4F/SEMA5B/STK25/ABI2,  
/C5AR1/LRP8/CCND2/RPS3/DUSP12/STK10/MTCP1/TGFB3/MUC20/ADRA2A/XRCC6/TELO2/MAP3K6,  
CASP3/BCR/DSC2/ATP2C1/NAB2/CTSL/KRT16/RBP2/ANXA1/RELA/NSDHL/TMEM79/HOXB13/LHX2/\

PC3/WIPF1/CSNK1E/SORT1/RIN1/HYOU1/PIP5K1C/TGM2/HIP1R/ARFGAP1/SNX10/STAB1/SIRPG/  
SPA2/ADAM28/SRPK1/BAD/DNM2/SPA17/NOTCH1/CFTR/GJB3/ERCC1/PRSS21/BCL2L1/GLI1/MEA1,  
AGOH/RCC1L/GGA3/NANOS1/TARBP2/ETF1/EIF5A/EIF3E/CAPRIN1/RPUSD3/NSUN4/RHOA/RPL13A,  
FKBP14/GET4/FBX06/STUB1/BAG6/FAF2/CHAC1/TMEM67/ADD1/FBX044/SSR1/P4HB/ATP2A2/PD.  
ATP2B1/IFNG/ANXA1/AKAP8/CHID1/PTPRS/CLEC4A/APPL2/MUL1/ARG2/CPTP/LILRB1/RNF135/1

3/FZD1/EFNB1/RHBDF1/CD3E/TCIRG1/ATP6AP1/PAK1/CD63/IGFBP6/BAIAP2L1/FGFR4/SPRED1,  
TTN/RNF157/PLXND1/VIL1/RAB10/C12orf57/TNIF/TUBB2B/FGFR2/DVL2/WASF1/NSMF/GRB7/LI

3AD/DNM2/SPA17/NOTCH1/CFTR/GJB3/ERCC1/PRSS21/BCL2L1/GLI1/MEA1/SSTR2/TARBP2/GORAS  
SPINK4/APP/DNAJB6/DPEP1/CTSD/HSPE1/CARD16/PDCD5/FADD/CLEC7A/RACK1/IGBP1/DAP/MAP

31/SLC9A3R1/MT3/FLOT1/SH3KBP1/VLDLR/COL6A3/LYPLA2/VSIG1/SHC1/PIK3CD/YWHAH/KIF14,  
2/TWIST1/APBB1/MLLT6/DNMT3B/ZMIZ1/DMAP1/CRTC2/POLE3/BRPF1/MECOM/CTBP1/SEH1L/SUV

/PPP1R11/NLRP3/WNT5A/C5AR2/CLECL1  
24/MUL1/TRIM56/LILRB1/DDX1/FGL2/C1QBP/NLRP3/TICAM1/CD40/LSM14A/TRIM44/AIMP1/PCBI  
AMP1L/TIMM9/SLC25A36/TIMM22/USP36/NMT1/PAM16/HTRA2/ARIH2/FZD9/PNPT1/UBL5/MUL1/B

/SIRPA/SPON2/IRF1/DUOX2/IRF3/F2RL1/PRSS3/STAT1/CCL13/NPC2/TNFRSF11A/WIPF1/NPLOC  
/TNIK/TUBB2B/FGFR2/DVL2/WASF1/NSMF/GRB7/LRP8/EMB/BTBD3/SEMA4B/GRB2/PARD6B/LLGL1,  
/SIRPA/SPON2/IRF1/DUOX2/IRF3/F2RL1/PRSS3/STAT1/CCL13/NPC2/TNFRSF11A/WIPF1/NPLOC  
35/RPS20/VPS25/NUP107/GRPEL2/HK1/RPL18A/GZMB/TIMM44/PDCD5/TOMM40L/AP3D1/RPS19/RI

./SGCE/TRIP6/TTYH1/EMID1/VCAM1/SRGAP2/DNM2/PTK2/THBS1/NOTCH1/OLFM4/VEGFA/ACTN1

/DAP/PACS2/ATP6VOD1/MAPT/RUBCN/RHEB/VMP1/SUPT5H/PAFAH1B2/EEF1A2/ABL1/VCP/IL10RA,  
J11/BAIAP2L1/LYPD8/SIRPA/SPON2/IRF1/DUOX2/IRF3/F2RL1/PRSS3/STAT1/CCL13/NPC2/TNFI  
I12/EIF2S3/DENR/RPL39/SMPD4/RPL35A/FARSB/MRPL13/GCN1/CDC123/EIF4A3/ILF3/GRB7/ZNI  
/DAP/PACS2/ATP6VOD1/MAPT/RUBCN/RHEB/VMP1/SUPT5H/PAFAH1B2/EEF1A2/ABL1/VCP/IL10RA,

MSN1/IL12RB1/CD79A/HLA-B/MSH2/PRKD2/SIT1/CD6/IL4R/GZMM/LAIR1/SWAP70/CD48/TRPM4/(



/SCN1B/SEMA3C/PTPRF/SEMA3E/MAPT/CHN1/EXT1/ABL1/STK24/VCL/KEL/DBNL/PLXNC1/HSP90A  
DD1/TNFAIP3/TRADD/BCL10/LPAR5/RPS27A/SFRP4/RNF2/PIAS4/MAVS/VEGFA/PLA2G1B/TLR2/C

IK3R2/CNEP1R1/APPL2/NOLC1/NUP214/HDAC3/SMAD3

3H12A/PAM/BID/CCT4/BCAP31/UBE2J2/FERMT1/NPEPPS/SRI/ADAM8/YWHAH/GIPR/MCU/FRMD8/H  
FIGAR/BECN1/WDR6/EIF4G2/ATG7/HTT/HAX1/RPTOR/ATP6V1B2/CSNK2A2/LARP1/KIAA1324/SNX:

L1/NPFFR2/TGFA/RRAS/CCL13/TNFRSF11A/C1QTNF1/PSMB2/NELFE/FGFR1/ZC3H12A/PSME3/SLC  
/ACTG1/NCKAP1L/SMPDL3B/HLA-DQA2/MY01G/NONO/PIK3CD/PLSCR1/CD209/LYN/HLA-DRB5/CARL  
VASF1/OXTR/NEB/GPX1/CAPZB/SEMA4B/GRB2/ARHGAP18/SLC12A7/SEMA4D/ADRA2A/SWAP70/CDC  
/PFN1/IFT80/AP2S1/MST1R/RNF220/ATP6VOC/PSMD10/PSMD11/EIF4A3/PSMD1/PSMA7/RUVBL2/I

/RBBP7/SEMA3C/EPB41L3/SEMA3E/MAPT/RERG/CDHR2/RARG/ABL1/VCL/GNG4/RASAL1/SFRP2/BR

√1/PPP2R3A/SSH2/PTPMT1/MASTL/DUSP7/LMTK2/SSH3/PPP2R5B/NUAK1/PPM1F/MTMR7/TIPRL/Pl

USP22/PTPRC/CDK5RAP1/PPARG/WWTR1/CASP3/ADAR/RPL11/TRIM27/PARK7/RHOH/MLLT1/HYAL4

1/NPFFR2/TGFA/RRAS/CCL13/TNFRSF11A/C1QTNF1/PSMB2/NELFE/FGFR1/ZC3H12A/PSME3/SLC

34/PIK3R5/MAP3K1/MAPKAPK5/ADORA2B/UBE2N/KITLG/CCL19/PIK3R6/IRAK2/EGF/MAP4K1/MAP4

3B/GPC2/NIN/DPYSL3/AP2A1/IST1/ZC4H2/ARF1

05/DCLRE1C/ERCC3/DNASE1L1/EXOSC2/DBR1/FIP1L1/CSTF3/DDB1/EXO5/MOV10/PPP1R8/CASP3,

PKAPK5/ADCY6/ADORA2B/UBE2N/ADCY5/CCL19/IRAK2/EGF/MAP4K1/MAP4K2/DAB2IP/RPTOR/BOR

SP90AA1/DNM2/PTK2/NOTCH1/MAP1A/VEGFA/RAB3A/FBXO45/RAB11A/TUBB3/IFRD1/CDK5R1/ME  
MAGEF1

A13/BDKRB2/CCR3/PLCG1/LPAR1/TMEM38A/CHD7



2/VPS16/C2CD5/RAB8B/CD59/RAB1B/VPS8/STAM/VAPA/TBC1D20/TMCC1/TSNARE1/VAMP3/KIF5B,

2/OR2T8/OR4D2/OR2M2/OR2A25/OR10A5/OR1L4/OR5A1/OR10A2/OR8G1/OR56B1/OR4F4/OR8D2/(

)/SHMT2



MAPC4/HUWE1/FBXO44/SKP2/PSMB1/FBXO10/TRIM32/PSMB6/CDC23/TRIM27/PSMA3/RNF144A/UBI  
L2/DAB2IP/DUSP22/BMP2/STK4/MAP3K7/FGF19/MFHAS1/SH3RF1/NOX1/MYC/ZNF622/SKP1/MAP3I

MEIS2/SFRP2/BRAT1/GNGT2/NFATC4/CHEK2/RAD1/VCAM1/DNM2/USF1/PLK3/RAD18/FNTB/ERCC1,  
FOXK2/CSNK1E/NUP93/NUP205/ODC1/NUP37/PSMB2/DDIT4/PPP1CA/NDC1/PIM2/NUP188/ZC3H12,

C/MBD2/PRMT6/BRD4/NSD1/FAM98A/DYDC2/THUMP2/KMT2B/SUPT6H/KDM3A/MBD1/ZMPSTE24/SE

SME3/HSPBP1/MT3/BCAP31/ATG101/MLST8/ADAM8/TRIM65/CAPN1/PIP4K2A/LAMP3/ATP6V1H/DAI

ORAB/MSH2/TBX19/RALA/UBE2A/GRB2/RUNDC1/MAFF/KAT2A/TGFB3/PRRX1/DNAJB6/OCRL/PCGF2,  
GEF25/NOTCH1/ARHGEF11/CD2AP/PLEKHG6/DENND4B/ARHGAP28/RHOA/RAPGEF1/HEG1/EP8L1/K

VC3/SPOCK1/RNF157/PHB/MAPK11/DNAJB2/TGFB2/TAF9/VIL1/GSK3A/PML/RAI1/SOCS3/FGFR2/  
IN/ARRB2/SPRY4/GPATCH3/MAPK7/AKT1S1/RACK1/ZNF675/IGBP1/RGS3/TNIP1/RASAL3/PTTG1II

MEF/PDCD10/KCNN4/BAD/CD33/PTGER4/PSMD9/VPS35/CFTR/PLK3/SH3GLB1/MAVS/PFKFB2/PLA2G  
3R01A/LOX/IBSP/ACSL3/VWA1/LUM/COL4A2/LAMB3/MATN3/APP/DNAJB6/COL8A2/PRDX4/MMP19/

74A3/GORAB/MSH2/TBX19/RALA/UBE2A/GRB2/USP22/RUNDC1/MAFF/KAT2A/TGFB3/PRRX1/DNAJB6

ORT1/STX10/B4GALT3/B3GALNT1/RAB35/PITPNM1/ST3GAL4/ARF3/ARFGAP1/BCAP31/CHST10/CY  
RP1/ACTB/MTA2/WDHD1/TCP1/SWI5/DNMT3A/THOC5/PPP1CC/SIRT7/CENPK/PML/DSN1/PARP1/TH  
LIP/SLC35F6/ANKRD27/RNASET2/FPR1/MNDA/PTGES2/GYG1/HGS/NPC1/CCT2/C3AR1/HSP90AB1/I  
/SMARCC1/BRD9/KAT2A/BEND3/CBX5/NCOR2/CBX8/HELLS/PCGF2/HMG1/TELO2/RAD21/MTBP/RBI  
M5/SMARCD1/CENPL/HMGB2/TCF3/TRIM28/POLA2/BRMS1/SIRT6/SGO2/ARPC4/WDR76/GINS4/PRI  
T1/ILF2/RRS1/E2F8/CCDC86/RRP9/PRMT2/DDX11/CEP85/SUB1/POLR3K/REX04/RRP1/KRT18/PPI  
LIP/SLC35F6/ANKRD27/RNASET2/FPR1/MNDA/PTGES2/GYG1/HGS/NPC1/CCT2/C3AR1/HSP90AB1/I  
18/CTSD/AP3D1/AP1B1/CCZ1/ABCC10/M6PR/GNB4/ATP6VOD1/NSF/HPSE/SLC48A1/RHEB/SEC13/I  
UCA2/RNF19B/CD63/ABCB6/STK11IP/SLC35F6/ANKRD27/RNASET2/FPR1/MNDA/PTGES2/GYG1/GI  
/KIF15/POC1A/LCK/C7orf31/HAUS8/DYNC1LI1/PLK4/IFT80/TUBG2/TBC1D31/MVB12A/KIF2A/OI  
/SPDL1/LZTS2/WDR13/DDX11/CEP85/KRT18/PITPNM1/CCT4/SNX10/CEP89/GPSM2/FLOT1/HAUS1,  
LIL1/DSN1/MAP4/TUBG2/RAE1/KIF2A/ODF2/RPS3/CDC42/KAT2A/ZNF207/TOPBP1/MZT2B/APP/I  
P1/FERMT1/CYTH2/FLOT1/ACTG1/RPLP2/FGFR3/SH3KBP1/PAK4/FOCAD/CAPN1/CAP1/FZD2/JAG1,  
HMP3/AP2M1/ABCA2/RAB10/PML/SLC29A3/VPS28/AP2S1/UBA1/SNX27/ATP6VOC/APH1B/MVB12A,  
32/TCIRG1/HLA-A/CD63/DOK3/ANKRD27/FPR1/STX1A/RAP2B/RHOF/STX6/SIRPA/RAB3B/DEGS1/I  
ARPC5L/RAC1/ACTB/BCAR1/CTTN/FGR/NPM3/MYADM/WAS/VIL1/SPECC1/CIT/WASF1/MST1R/CTTN  
DSN1/PRCC/DVL2/SURF2/IL15/THOC6/RNF113A/CPSF6/EIF4A3/ISG20/SBF1/KIF2A/PTPN23/CEI  
13/RAB3D/MFF/SIPA1/STX7/COPG2/ERP29/SGTA/VPS45/SCAMP2/VDAC2/RAB3A/SREBF1/COPS5/;  
JOA/FLOT2/CANT1/IQGAP1/CFD/OLA1/FTH1/STXBP2/PSMD2/TFF3/ITGAX/SYT8/HSPA8/NEU1/GM  
27/FPR1/STX1A/RAP2B/RHOF/STX6/SIRPA/RAB3B/DEGS1/ECE2/CD58/C3AR1/DYNLL1/RAB7B/TGI  
INS4/PRKDC/RUVBL1/MAD2L2/HIF1A/CHTF18/CBX1/CENPE/UBE2I/CHD3/PPP2R1A/ACD/RBBP8/PI  
P4M1/B3GNT5/GBGT1/CHST1/ABCB6/PTGES2/FUT4/STX6/B3GNT9/SCAMP4/ECE2/CORO7/GALNT18,  
2G4/GPR137B/ACLY/FLOT1/CD68/VLDLR/HLA-DQA2/LAMP3/CPNE1/ATP6V1H/CAP1/ASAHI/CLN3/;  
J2/LAMTOR5/RAP2A/CTSS/LAMTOR1/TMEM9/CHMP3/AP2M1/ABCA2/RAB10/PML/SLC29A3/VPS28/AI  
35/PPP1CC/SIRT7/CENPK/PML/DSN1/PARP1/THOC6/NSMF/SMARCB1/CPSF6/KMT5C/ZMIZ2/TIPIN,  
45A/HIP1R/ARF3/SLC9A3R1/PAM/MT3/TPPP3/BCAP31/BCL3/GTPBP4/PRR7/ARHGAP1/SLC39A13/I  
A/TGM2/LASP1/FERMT1/CYTH2/FLOT1/ACTG1/RPLP2/FGFR3/SH3KBP1/PAK4/FOCAD/CAPN1/CAP1,  
P6R1/GPSM1/B3GNT7/RAB7B/TGFA/CHPF2/COPE/TMED9/PSENEN/SORT1/STX10/PLOD3/B4GALT3/I  
18/CTSD/AP3D1/AP1B1/CCZ1/ABCC10/M6PR/GNB4/ATP6VOD1/NSF/HPSE/SLC48A1/RHEB/SEC13/I  
1/GAS2L3/NCKAP5L/MAP2/IFFO2/FKBP1A/TPM2/IQGAP1/MYL6B/RGS14/SLC1A4/PLEC/LCP1/MAP  
1/GAS2L3/NCKAP5L/MAP2/IFFO2/FKBP1A/TPM2/IQGAP1/MYL6B/RGS14/SLC1A4/PLEC/LCP1/MAP  
3/CHIT1/PSMD14/TIMP2/SYNGR1/DNAJC5/TRAPPC4/HSPA6/DDOST/ALOX5/PLEKHO2/MIF/CD300A,  
3/NCKAP5L/MAP2/IFFO2/FKBP1A/TPM2/IQGAP1/MYL6B/RGS14/SLC1A4/PLEC/LCP1/MAP1S/TPM3,  
TUBB6/TUBA1A/TUBB2A/TTL1/PALLD/DYNLRB1/CCT2/LMNA/DYNLL1/DYNC1H1/CAPN6/KNTC1/GA  
3/AKAP8L/UTP18/ACTB/APOBEC3G/PPIL1/RPS21/UTP14A/MEG3/MRPL12/RPL7/EIF3I/VBP1/RPL  
A5/RUNX3/DMAP1/CCAR2/TBP/IPO4/MSH6/SAP130/MORF4L1/EP400/LDB1/SRCAP/SIN3B/TRRAP,  
K5/TCP1/KIFC3/KIF15/RASSF1/HAUS8/DYNC1LI1/MAP1LC3B/TUBB2B/MAP4/TUBG2/KIF2A/ODF  
7/MCAM/PPP1CC/RAB10/PFN1/WASF1/ATP6VOC/YWHAQ/GRB7/PARVG/YWHAB/RPS3/RPL27/RALA/C  
AM/PPP1CC/RAB10/PFN1/WASF1/ATP6VOC/YWHAQ/GRB7/PARVG/YWHAB/RPS3/RPL27/RALA/CNN2/C  
7/MCAM/PPP1CC/RAB10/PFN1/WASF1/ATP6VOC/YWHAQ/GRB7/PARVG/YWHAB/RPS3/RPL27/RALA/C  
GLIPR1/RAB3A/CYB5R1/TLR2/TMBIM1/SLC15A4/AP2A2/ATP6AP2/SLC2A3/TSPAN14/MLEC/PLA1A,  
/RPS3/FGD6/NRBP1/PRKCI/APP/SWAP70/SPRY4/STX4/ABI2/MYO5A/VIM/ARFIP2/EPB41L3/MAPT,  
P6B/ZNF207/CBX5/NUP107/HELLS/XRCC6/TELO2/RAD21/MTBP/CENPN/NABP1/RPA2/NDE1/ZWILCH,  
AP2S1/OSTM1/UBA1/ATP6VOC/TMEM63A/KPTN/YWHAB/SLC22A17/BORCS8/GLMP/STARD3/VPS18/C  
9/EIF2D/MRPL33/LARP1/MRPS5/SRP68/RPL13/MRPL36/RPL4/RPL41/RPL9/MRPL14/RPS6/RPL24,  
/RPL32/RPL30/PSMC5/SNAPIN/MMS19/HPS3/SURF6/RPS9/HTT/PI4K2A/RPS14/GET4/RPS27/RPL



3/SYNCRIP/CCDC12/HNRNPA2B1/U2AF1L4/LUC7L3/TRA2B/SUGP1/LSM3/PRPF40B/CACTIN/BCAS2,  
P/L24/RPL11/RPL10/RPS24/MRPL3/RPS3A/MRPL20/RPL14/MRPL24/MRPS16/RPL10A/MRPL55/ZNF6

U1/RRAGD/TMEM165/RAB25/MAPK3/RRAGC/HLA-DQB2/TCIRG1/MICALL1/HLA-A/MAP2K2/AP4M1/A  
F16/CDK7/PDSS1/UBE2E1/RUVBL2/CCND2/FBXL6/POLE4/PIGC/RBBP4/POLA1/BARD1/UBE2A/ASB

OX1/GTF2F1/TAF3/ERCC3/SIX5/TAF1B/TADA3/RRAP/SNAI3/PPARG/JUNB/WWTR1/SRA1/NFYA/S  
A5/EPS8L1/EPHA2/KSR1/MPP2/ATP7A/CIB1/PKD1/BBS7/PROM2/TMEM67/C2CD5/GNA13/MYO1C/AI

P155/TMEM120B/CBX5/CALR/CTDNEP1/RANBP1/APP/NUP107/DMPK/CETN2/RRM1/NOC4L/BNIP1/CI

011/PSPC1/HOXB5/MALT1/LEO1/SUPT20H/WDR43/YBX2/POLR1D/TAF4B/PLRG1/CDK12/MBD6/TOP1

3P1/GMFB/MAEA/HAX1/CAV1/RIC8B/CNKSR1/ACTR1A/LLGL2/C2CD5/SPIRE2/PPP1R9A/UTRN/PXN,

LA-F/AP2A2/RAB11A/VPS11/RAPGEF1/CLTC/STXBP1/TAPBP/TAP2/AP2B1/HBEGF/STXBP4/BECN1,

2R/VAMP3/TMEM79/CHID1/FAM91A1/VPS54/RAB6A/PLD4/GGA2/ATXN2/TEPSIN/MMP24/ARFGAP3/

/KLHL12/PEF1/EGF/EPN3/LMAN2/ATP7A/ACTR1A/CD3G/LMAN2L/VPS16/ERGIC2/RAB8B/CD59/IEI  
1/ACTG1/SRI/PRR7/GABRR3/SV2A/SYNGR3/CLN3/LRFN1/LYN/MCTP1/RAC1/TMEM163/CNTNAP1/  
2/ALDOC/TGFB3/APP/PNP/XRCC6/PSMD3/CTSD/PSMD7/ECM1/GMFG/PRDX4/CCT8/HPSE/S100A7/G

32/THOC2/KIF22/DGKQ/BAZ2A/PPIE/RBM14/APBB1/TRIM69/NEK6/POLR2D/GATAD2A/SART3/DHX

1/ARL8B/PARD3/PRSS12/EXOC3/APBB1/AP3B1/HNRNPR/AP1S1/ACAP3/RAB27B/NIN/DPYSL3/SNAI

RAPPC1/GSDMD/CNN2/CALR/ALDOC/TGFB3/APP/PNP/XRCC6/PSMD3/CTSD/PSMD7/ECM1/GMFG/PRD  
RFIP2/WDR1/RASAL3/PARD6G/MAPT/NF2/EMD/KDF1/ACTR3/BIN2/IFT172/DBNL/TCTEX1D2/PTK2,  
15/WHRN/PRKCB/DOCK7/KCNIP3/TRAK2/SYP/TSC1/SHTN1/EXOC6/RAC3/UNC13A/MAP3K12/ELK1/I

PC15/SKP1/ANKIB1/MED30/ATG3/DERL1/KCTD13/CUL7/RNF19A/ABTB1/USP33/FBXL18/FBXL2/CI

RAPPC1/GSDMD/CNN2/CALR/ALDOC/TGFB3/APP/PPN/XRCC6/PSMD3/CTSD/PSMD7/ECM1/GMFG/PRD

3/PIK3C2B/CCNJ/POLR1C/POLR3A/SESN2/PRPS1/ERCC2/PIK3R2/SLA2/IKBKB/SUPT3H/ZNRD1/TI

ID1/MRPS2/PNPT1/MRPL21/NDUFA7/MRPS26/DNAJC11/MRPS11/NDUFA6/TIMM21/UQCRI0/MRPL42,

/SNX16/MVB12B/OSBPL9/IGF2R/RAB22A/AP5S1/CTSL/VPS33B/VPS29/CTNS/CHID1/ARL8A/DERL  
DI1/EPHB3/PPP1CA/HIP1R/PAM/MT3/DYNLT1/KISS1/SRI/PRR7/TUBB4A/ATF4/SV2A/GLRX3/HCF

341/NEURL1/SYT11/PDE4B/RPL14/DMTN/RPL10A/FXR1/NETO2/RPL12/SEMA4C/CNIH2/RPS18/PTI

/NUFIP2/LSM14A/EIF4ENIF1/ZC3H12D/DCP1A/TDRD5/CARHSP1/TRIM5/SMN1/CNOT1/MEX3B/NSU  
1/PLCG1/PPP1R9A/BCR/SEMA3F/ATP2B1/SPARC/FXR1/RELA/VAMP1/FZD9/CNIH2/PTPRS/ELAVL  
4B/RPL14/DMTN/RPL10A/FXR1/NETO2/RPL12/SEMA4C/CNIH2/RPS18/PTPRS/TSC1/SORCS2/ACTR

/P/MUL1/PPOX/RER1/DNAJC11/PEX16/ECE1/UBIAD1/PISD/STX16/IMMT/CSGALNACT1

21/RNF4/PRDM4/VRK1/POLR3D/TFAP2A/MED12/RERE/SUPT5H/SSBP1/OVOL2/MTA3/NFATC4/DNT  
ND8/HSF2/RBPMS/HSBP1/ATXN7L3/NCOR2/GMEB1/DDX54/FUS/TBL1XR1/DR1/RNF4/E2F6/DPF2/1  
MTK3/CDK7/MATK/CCND2/PRKD2/STK10/PRKCI/GRK2/DMPK/MAPK7/MAP3K6/AXL/RPS6KB2/BTK/D  
/RPL10L/TNC/MUC3A/RPS5/MGP/ACTB/RPS21/MRPL12/RPL7/RPL28/MRPS34/PSMD13/NUP85/CLTI  
AP18/RANBP1/AHSA1/AGAP1/APP/DNAJB6/CDC42EP2/MYO9B/OCRL/DNM1L/PGAM5/PPP1R15A/PDCI  
IL2/FSCN1/WIPF3/WASF2/CACYBP/RAB6B/CXCR4/FAM83D/GAS2L3/NDN/MAP2/TPM2/MTCL1/MSN/I  
C42BPG/PKN3/CARD11/NAGK/ALPK3/PFKM/CDK5/MLKL/FGR/MAPK11/PI4KB/LCK/HUNK/MAP3K14,  
RIT1/HSPA8/RRAGC/TCIRG1/CENPE/CHD3/ATP6AP1/GNA12/ABCB6/RAP2B/GNGT1/KLC3/TUBB6/RI  
RIT1/HSPA8/RRAGC/TCIRG1/CENPE/CHD3/ATP6AP1/GNA12/ABCB6/RAP2B/GNGT1/KLC3/TUBB6/RI  
RIT1/HSPA8/RRAGC/TCIRG1/CENPE/CHD3/ATP6AP1/GNA12/ABCB6/RAP2B/GNGT1/KLC3/TUBB6/RI  
RG1/CENPE/CHD3/ATP6AP1/GNA12/ABCB6/RAP2B/GNGT1/KLC3/TUBB6/RHOF/EFTUD2/ABCF2/XRC  
/SH2B2/PITPNM1/PAM/TNIP2/CCNO/PPME1/DUSP2/FBXO5/AATF/GYS1/PRR7/CNOT9/CDKN2B/SHC  
/S1/PRR7/CDKN2B/SHC1/KCNQ1/ATF4/KIF14/SV2A/HCLS1/AXIN1/GLRX3/TESK1/DCTN2/ITGB1BI  
C9A3R1/GPSM2/AATF/SH3KBP1/TCEAL3/ARHGAP1/CNOT9/HEYL/DAPK3/GABRR3/FZD2/ATF4/CDK  
1/UBE2Z/SH3PXD2B/EFNA5/TNFAIP8/PSMD2/RGS14/NUPR1/PYG02/OAZ1/GM2A/SERPINE1/MAP2K  
3/CDH11/MARK2/KRT18/PPP1CA/CORO1B/UNC45A/EEF1D/LASP1/PPME1/SLC3A2/EHD1/ADAM8/PAI  
2/PFN1/WASF1/ABR/SBF1/ARF4/CDC42SE1/XPO5/TRAPPC1/DENND6B/RIMS3/FGD6/PARD6B/RUND  
R5/FHDC1/MYO9B/KLHL17/AFAP1/EPB41L1/GMFG/MYO5A/WDR1/EPB41L3/FMN13/MAPT/ARPC1A/1  
/TNK2/AAK1/PLK3/MARK4/PAK2/MASTL/CDK11B/CSNK2B/LMTK2/MAP3K10/TP53RK/NUAK1/CDK20,  
SPD1/RAD51C/DNA2/HSPA2/RAD51D/VCP/ABCB9/HSP90AA1/CHD1L/TOR2A/CFTR/KATNA1/NVL/RAI  
C42SE2/CDC42EP2/MYO9B/OCRL/DNM1L/TRAPPC3/ABI2/MYO5A/ARHGDIA/ARFIP2/TBC1D10C/FMNI  
C42SE2/CDC42EP2/MYO9B/OCRL/DNM1L/TRAPPC3/ABI2/MYO5A/ARHGDIA/ARFIP2/TBC1D10C/FMNI

3AG2/TBC1D7/SGSM3/ARHGAP11A/SRGAP2/TNK2/TBC1D22B/ARHGEF11/RAB3A/SMAP1/PLEKHG6/AL  
CSAP/DCTN1/HAUS7/KATNA1/MAP1A/MARK4/RITA1/MAP7D3/LZTS1/FNTA/GLI1/RAB11A/CCDC88C  
A3/CAPZB/BAG3/CNN2/ARHGAP18/RANBP1/AHSA1/SWAP70/SH3GL1/CBL/RACK1/ARFIP2/CCT8/TR  
IA/TUBB3/RAB29/ARL8B/AGAP3/RHOA/ARF5/MRAS/RAB27B/BMS1/IFT22/ARF1/LSG1/MFN1/RHOB

AP28/ADPRH/AGAP3/RUNDC3A/GPS1/ACAP3/STXBP5/DOCK2/SGSM1/RANBP3/DAB2IP/PREX1/ARHG  
22/ARHGAP27/RIC8B/ARHGAP17/LLGL2/RALBP1/ARHGAP33/EVI5L/ASAP3/RALGAPB

TREX2/APEX1/SETMAR/SLX4/POLD2/ACTR8

16/RPL10A/MRPL55/RPL12/MRPS2/RPS18/RPS28/RPS17/RPL26L1/RPL22/MRPL21/RPS15A/NDUF

33/PAK4/GYS1/PIP4K2A/PAPSS1/CCL2/DAPK3/PIK3CD/CSNK1D/CDK2/TESK1/STK17B/LYN/CDC4  
33A/MBD2/FXR1/SYNCRIP/EIF4G1/HNRNPA2B1/RBMS2/ELAVL1/LUC7L3/SRSF3/SERBP1/TRA2B/HI

/PFBK/CDK5/MLKL/FGR/MAPK11/PI4KB/LCK/HUNK/MAP3K14/GSK3A/CDK18/NUAK2/TNIK/SLA/FGI  
38/TNFRSF14/KCNH2/FAF1/ARRDC1/BECN1/UBE2N/CACUL1/NEDD8/STUB1/BAG6/CASC3/FAF2/SU

1/ARRDC1/BECN1/UBE2N/CACUL1/NEDD8/STUB1/BAG6/CASC3/FAF2/SUM02/TNFRSF1B/PXN/SMAD3



RAB5C/GTPBP3/GPN2/DNM2/RASL12/ARFRP1/GNAI3/RAB3A/RCC1L/RAB11A/SEPHS1/TUBB3/RAB29/ARL8B/AGT1

2/RASL12/ARFRP1/GNAI3/RAB3A/RCC1L/RAB11A/SEPHS1/TUBB3/RAB29/ARL8B/AGAP3/RHOA/ARI  
2/RASL12/ARFRP1/GNAI3/RAB3A/RCC1L/RAB11A/SEPHS1/TUBB3/RAB29/ARL8B/AGAP3/RHOA/ARI

/PASK/MARK1/NISCH/OGT/OSBPL5/SNX6/SNX21/ZFYVE26/SNX2/GSDMA/SCIN/GAP43/PLEKHF2/O

1/GNAI3/RAB3A/RCC1L/RAB11A/SEPHS1/TUBB3/RAB29/ARL8B/AGAP3/RHOA/ARF5/GMPPB/MRAS/1

/GDF11/FAM3B/TNFSF15/NPPB/VEGFA/FNTA/DGKQ/METRN/INHA/GFER/HBEGF/NRTN/ADM/BTC/LRI

2/RASL12/ARFRP1/GNAI3/RAB3A/RCC1L/RAB11A/SEPHS1/TUBB3/RAB29/ARL8B/AGAP3/RHOA/ARI  
2/RASL12/ARFRP1/GNAI3/RAB3A/RCC1L/RAB11A/SEPHS1/TUBB3/RAB29/ARL8B/AGAP3/RHOA/ARI

/PSMD10/SMARCB1/ZMIZ2/MAMSTR/VDR/CDK7/ZBTB17/PADI2/CHD4/RUVBL2/RPS3/ANXA4/TBX19,

R1/SRCAP/GTF2F1/EDF1/ENY2/TADA3/PPARG/JUNB/WWTR1/SUPT7L/MNT/TRIP4/ASXL1/TRIM32/!  
RS2/DIMT1/TSEN15/RNASEK/RPP30/POLR2E/RNASEH1/SND1/DALRD3/TRMT2B/DHX38/EXOSC2/DBI

IGIF1/HDGF/HOXC6/HR/HSPA1A/E4F1/SF1/DNAJB1/GPS2/CIR1/MED1/RLIM/ID4/AEBP2/YAP1

P2/OR2T8/OR4D2/OR2M2/OR2A25/OR10A5/OR1L4/OR5A1/OR10A2/OR8G1/OR56B1/OR4F4/OR8D2/(

3/HSPA13/ATP7A/ATP6V1B2/ATAD5/ERCC3/VPS4A/RALBP1/ATP1B1/MYO1C/ATP2A2/KIF3A/ABCA'

C34/UBE4B/UBE2E2/SH3RF3/MAEA/TRIM68/FBX06/STUB1/ANAPC4/HUWE1/FBX044/SKP2/WDSUB1,

3P4/ACTB/MTA2/KDM5B/ETV6/DEAF1/ZNF205/SFPQ/PQBP1/DNMT3A/IFI16/ASCL2/MAZ/ZNF692/1

/CDK2/KPNB1/PHLDB1/CAMSAP2/DCTN2/KNSTRN/FKBP4/RAC1/CDK5/CHORDC1/STMN3/RASSF1/POA/CDK4/MAD2L1/MUC1/EME1/CDKN2D/ZNF385A/ARID3A/CDC7/SCRIB/TUBB4B/CHEK1/RAN/HSF1/1/PALLD/HSP90AB1/EPHB6/ISL2/ARPC2/SLC1A3/GAS7/CCL13/NBEAL2/RELN/S100B/CDH11/ZSWI1/37B/NPLOC4/CD83/POLR3K/LEF1/POLR2H/RPS6KA4/SERPINB1/IRF7/FGFR1/ZC3H12A/BCL3/LAG3/KA4/SERPINB1/IRF7/FGFR1/ZC3H12A/BCL3/LAG3/FERMT1/FLOT1/NCKAP1L/ADAM8/HDAC2/ATF4/H3/FADD/PELI1/CLEC7A/CLEC5A/POLR3D/LBP/POLR3H/HPSE/POLR3C/CCL3/HSPD1/CXCL17/ABLA/ACSTD2/PRKD2/PSMB3/RALA/PAX8/GRB2/ARRB2/CDC42/KAT2A/PSMD4/HOXB7/PSMD3/PSMD7/WDR4/PTGES2/RAP2B/GYG1/ARHGAP9/RHOF/SIRPA/DEGS1/HK3/CCT2/CD58/C3AR1/HSP90AB1/F2RL1/RHOF/SIRPA/DEGS1/HK3/CCT2/CD58/C3AR1/HSP90AB1/F2RL1/PRSS3/DYNLL1/DYNC1H1/ILF2/1/OLR1/SLC2A5/GPI/PA2G4/SERPINB1/PPIA/RAB24/ACLY/DYNLT1/CD68/NCKAP1L/ADAM8/CAPN1/DYNLT1/CD68/NCKAP1L/ADAM8/CAPN1/CPNE1/C1orf35/CAP1/ASAHI/KPNB1/SLC11A1/RNASE2/R4/PTGES2/RAP2B/GYG1/ARHGAP9/RHOF/SIRPA/DEGS1/HK3/CCT2/CD58/C3AR1/HSP90AB1/F2RL1/53/DOK3/SASH3/STK11IP/RNASET2/FPR1/MNDA/PTGES2/RAP2B/GYG1/ARHGAP9/RHOF/SIRPA/DE/RAB24/ACLY/DYNLT1/CD68/NCKAP1L/ADAM8/CAPN1/CPNE1/C1orf35/CAP1/ASAHI/KPNB1/SLC1E3/SNX10/BCL3/LAG3/NCKAP1L/JAG2/ADAM8/PRR7/PIP4K2A/EVI2B/CDKN2B/PIK3CD/KDELRL/H/KAT2A/IL4R/APP/PNP/CD8A/LILRB4/AP3D1/AXL/FADD/BTK/ZNF675/GPR183/WNT4/BTN2A2/CCILA-DPB1/ARPC4/UNC93B1/CFD/PRKDC/CD2/IL34/CREB3/STXBP2/EBI3/MAD2L2/PSMD2/HIF1A/1/SMB8/NFAM1/PSMB10/FGR/LCP2/PSMA5/CD300LF/NRAS/WAS/LCK/PTPN6/PSMD13/PSMC4/MUC5B/1/PSMD7/LILRB4/IKBKG/BTK/EIF2B5/ARPC1A/BTN2A2/BRK1/PSMD8/ARPC5/ABL1/FCGR2B/PSMA1/4/ACD/FANCE/ISG15/NPM1/RBBP8/FGFR4/BRCA1/NSMCE2/POLR2G/PCNA/MCRS1/XRCC2/CHAF1A/1/P5C/FUS/RAD21/BABAM1/UBE2L6/RFW3D/NABP1/RAD9A/XRCC4/OGG1/RPA2/CUL4B/PPP4C/RBM1/5C/ZMI22/PADI2/CHD4/UBE2E1/RUVBL2/POLE4/BCORL1/RBBP4/SAP30/PRKD2/UBE2A/SMARCC1/1/PQ/CPSF1/LSM2/PQBP1/TRMT112/THOC5/SRSF12/NSUN5/TRMT6/MPHOSPH6/PRCC/ISY1/BYSL/RP1/EIF2B5/RPL38/DRG1/MRPL52/KHDRBS1/RPL23A/MCTS1/PIWIL4/MRPL48/DAP3/BTG2/MRPS7/L5/CFD/OLA1/FTH1/STXBP2/PSMD2/RAB25/ITGAX/MANF/SYT8/HSPA8/NEU1/GM2A/SERPINE1/TCI/VASE2/LYN/CCL28/FPR3/RAC1/ITGA2/PLA2G7/IL1B/BCAR1/CDK5/PDGFA/CXCR3/CCL4/TGFB2/GI/CTL6A/IRF3/XRCC3/TICRR/E2F8/PARPBP/CTLA4/DDIAS/NPLOC4/DYRK2/CSNK1E/RFC2/DDX11/E1/LMNA/DYNLL1/DYNC1H1/SPDL1/XRCC3/CAPN6/DPCD/LZTS2/MARK2/CEP85/E2F4/KIFC2/TPPP3/DDIAS/CSNK1E/PRMT2/CEP85/E2F4/PSMB2/INCENP/FGFR1/PSME3/SLC9A3R1/BID/GPSM2/HAUS1/JAML/CD3E/TCIRG1/CDCA7L/PAK1/SASH3/ADGRG1/NPM1/TNFRSF4/FGFR4/SLC39A10/SLC35F6/ZI/MAGOH/ARL6IP4/IVNS1ABP/ZPR1/THOC2/RBMX/ZRSR2/HNRNPA1/PPIE/POLR2I/POLR2J/HNRNPL/1/BAG2/RNF216/PSMB5/PSMA4/SGTA/PSMD9/RCN3/RPS27A/FBXW5/PLK3/MAP1A/HSPA5/FBXO45/UI1/DYNLL1/DYNC1H1/SPDL1/XRCC3/MYO19/TICRR/TGFA/KNTC1/PPP1R9B/E2F8/CSNK1E/PRMT2/DI/ARPC5L/RAC1/AKAP8L/IL1B/GBA/CDK5/CD47/UBE2L3/PFDN2/CTTN/TCP1/WAS/ZNF205/SFPQ/POAH/BBC3/PMAIP1/STK17B/LYN/LDHA/CDK5/PHB/TGFB2/ZNF205/SFPQ/F3/DNMT3A/LCK/PTRH2/C/H12A/BCAP31/DYNLT1/RPL17/RPLP2/EIF3D/LAMP3/ATP6V1H/ULBP2/CCL2/RPSA/SHC1/TRIM31/1/THOC5/PSMD13/PSMC4/SRSF12/TRMT6/RPL39/PRCC/EDC3/ISY1/RPL35A/SET/THOC6/PSMD10/RI/UBR5/PPM1F/BAZ2A/TWIST1/RBM14/APBB1/PPhLN1/MLLT6/RNF8/SART3/PRMT3/DNMT3B/COPRS/LAMA5/FPR1/STX1A/EDA/MMP2/SMARCA4/NOL3/SOCS1/IRF1/DUOX2/IRF3/HSP90AB1/F2RL1/STA/SET/MRPL13/SMARCB1/NES/KIF2A/PADI2/DFFA/CAPZB/DNASE2/SMARCC1/CHMP1A/TGFB3/CTDNEI/23A/EXOSC3/MCTS1/PRPF19/MRPS7/PTGES3/TRAF7/NAT10/UTP6/HEATR1/MPV17L2/SART1/NOP/3/WIPF1/LIMCH1/PDLIM3/SH2B2/CORO1B/ABLIM2/PIP5K1C/HIP1R/SLC9A3R1/PAM/CYTH2/ACT/DC1/CDC42EP2/OCRL/CETN2/LRRC61/WRAP73/TMEM107/ARFIP2/CEP250/HAUS6/PMP22/ATP6VOD/P5K1C/HIP1R/SLC9A3R1/PAM/CYTH2/ACTG1/NCKAP1L/MLST8/SH3KBP1/CAP1/CAPZA1/RTKN/SI/KDELRL/HCLS1/FANCA/JAG1/MITF/LYN/CARD11/CBFB/CDKN1C/PSMB4/PIAS3/IL2RA/NCAPH2/PSI/EPHA2/KITLG/CCL19/VPS33A/EIF6/NOTCH2/MAEA/HAX1/LDB1/PKNOX1/RPS14/INPP5D/CIB1/P/IRPA/SOCS1/IRF1/ARPC2/CTLA4/FSTL3/CD83/LIMCH1/PLA2G2D/TFE3/C1QTNF1/EPHB3/ZNF703/IL1B/GBA/CPA2/KCTD10/CTSS/WFS1/UBE2L3/CLN6/PSMB8/RNF187/PSMB10/PHB/PSMA5/DNAJB/580/THY1/RHOF/CORO1C/C3AR1/LMNA/F2RL1/RRAS/RELN/BEX4/LIMCH1/ZNF703/PPARD/CORO1B/SL2/GAS7/PPP1R9B/RELN/S100B/CDH11/ZSWIM5/MARK2/GDI1/EPHB3/NUMBL/RAB35/FGFR1/SLC/

5/PLXND1/VIL1/GSK3A/NDRG4/TNIFK/TUBB2B/DVL2/PFN1/INPP5J/MAP4/NSMF/LRP8/TACSTD2/CLIP1/NUP85/PSMC4/GSK3A/NUP43/FBXW9/SOCS3/ANAPC11/VPS28/UBE2D1/RNF220/UBA1/PSMD10/RNF181/RHBDF1/IL27RA/TCIRG1/DKC1/PAK1/CAPN10/TNFRSF4/STX1A/MCRS1/STX6/SOCS1/SLC51B/CLIP1/HSPA4/TRAM1L1/SIX2/RTKN/RPSA/CSNK1D/YWHAH/KPNB1/SNF8/KDELRL/HCLS1/BBC3/PMAIP1/CLIP1/RRS1/GAS7/FMOD/ARPC3/NDUFAF2/NUP93/WDR77/HOPX/NUP205/BRIX1/CORO1B/RRP7A/NDC1/SNRPB/PSMB8/RPL7/RPL28/PSMB10/PSMA5/POP1/LSM2/PSMD13/NUP85/PSMC4/GSK3A/NUP43/RPL39/ELAVL1/NIFK/NABP1/LAS1L/TRIM71/UTP4/MAPT/EXOSC3/PIWIL4/NAT10/UTP6/HEATR1/SART1/NOP58/34/SERPINE1/PP1A/RAB24/ACLY/DYNLT1/CD68/NCKAP1L/ADAM8/CAPN1/CPNE1/C1orf35/CAP1/CLIP1/SERPINE1/IL27RA/PAK1/TMIGD3/GNA12/ADGRG1/PRKX/CHMP4C/LAMA5/SPRED1/RAP2B/ZNF580,33R/CCL4/MYADM/TGFB2/GPSM3/F3/FAM89B/VIL1/CHMP3/MAZ/CCR1/TUBB2B/CXCL16/PFN1/NSMF,31/IL15/RPS3/SIT1/GRB2/CD6/DROSHA/CDC42/KAT2A/IL4R/PNP/CD8A/LILRB4/AP3D1/FADD/PI3K/34/SERPINE1/PP1A/RAB24/ACLY/DYNLT1/CD68/NCKAP1L/ADAM8/CAPN1/CPNE1/C1orf35/CAP1/CLIP1/VASE2/LYN/CCL28/FPR3/RAC1/ITGA2/PLA2G7/IL1B/BCAR1/CDK5/PDGFA/CXCR3/CCL4/TGFB2/GI1/ZNF598/PLEKHN1/EIF2B5/RPL38/DRG1/MRPL52/KHDRBS1/RPL23A/MCTS1/PIWIL4/MRPL48/DAP3,35/5/TGFB2/ZNF205/SFPQ/F3/LCK/PTRH2/CASP1/GSK3A/PML/ABR/APH1B/LTBR/VDR/TNFSF12/YWJ11/J1/PRELI1/KRT18/PPARD/LEF1/PDCD1/PA2G4/IRF7/PIM2/HIP1R/ZC3H12A/PSME3/BID/MT3/TI35/5/TGFB2/ZNF205/SFPQ/F3/LCK/PTRH2/CASP1/GSK3A/PML/ABR/APH1B/LTBR/VDR/TNFSF12/YWJ11/AS/HYOU1/PRELI1/KRT18/PPARD/LEF1/PDCD1/PA2G4/IRF7/PIM2/HIP1R/ZC3H12A/PSME3/BID,33XO45/UBA52/CD2AP/EDEM2/PSMC3/CHFR/AGAP3/GLMN/ANKZF1/TMUB1/PSMC5/FAF1/CCAR2/FBXO1/DYNC1H1/ARPC3/LIMCH1/SUB1/ORMDL2/EPHB3/CORO1B/TPBG/HIP1R/BID/TPPP3/GPSM2/FLOT1/IF3FB3/ZMYND8/SEMA4D/SWAP70/CDC42EP2/MED25/RBX1/PIP4K2C/GMFG/WRAP73/ABI2/CLEC7A/R32H/IRF7/PP1A/NUP188/ZC3H12A/BCAP31/DYNLT1/RPL17/RPLP2/EIF3D/LAMP3/ATP6V1H/ULBP1/1CA/LEF1/NDC1/NELFE/POLR2H/IRF7/PP1A/NUP188/ZC3H12A/BCAP31/DYNLT1/RPL17/RPLP2/E33/UBAP2L/FSTL3/PPARD/LDOC1/NDC1/PAM/CCT4/BCAP31/FBXO5/JAG2/SPAG1/RSPH1/SCMH1/HD33R/KNTC1/PPP1R9B/E2F8/CSNK1E/PRMT2/E2F4/PSMB2/PIM2/PSME3/BID/CCNO/PPME1/HAUS1/BITGAX/MANF/SYT8/HSPA8/NEU1/GM2A/SERPINE1/TCIRG1/SLPI/FUCA2/CD63/DOK3/STK11IP/RNA3/HLA-A/SLPI/PAK1/ISG15/MNDA/SIRPA/TRIM59/SPON2/SOCS1/CD58/IRF1/IRF3/HSP90AB1/F2R1FK/PELI1/CLEC7A/TNIP1/POLR3D/LBP/POLR3C/HSPD1/PSMD8/FCGR2B/PSMA1/TNFAIP3/MAPKAP1ARPC2/STAT1/RAB7B/HDAC1/RELN/CSNK1E/CD83/MARK2/GDI1/ZNF703/NUMBL/PPARD/LEF1/PA23KN1C/PSMB4/LAMTOR5/CDK5/LAMTOR1/PSMB8/PSMB10/PSMA5/TGFB2/RASSF1/THOC5/PSMD13/PS13/CKN2B/SHC1/KIF14/AXIN1/SLC11A1/TESK1/LYN/WNT7B/ITGB1BP1/BIRC7/GPRC5B/CDKN1C/DUS13/LAG3/SIRPG/NCKAP1L/JAG2/ADAM8/PRR7/ULBP2/CCL2/TXLNA/PIK3CD/KDELRL/FANCA/SLC11L1LI1/DSN1/ANAPC11/CYP26B1/TUBG2/KLHDC8B/KIF2A/ZNF207/CHMP1A/CALR/INF2/TDRKH/RAN1ADAM8/PRR7/PIP4K2A/EVI2B/CDKN2B/PIK3CD/KDELRL/HCLS1/FANCA/JAG1/MITF/LYN/CARD11/CLIP1/PML/SOCS3/FGFR2/COCH/DVL2/PFN1/AP2S1/COL6A2/PSMD10/PSMD11/VDR/PSMD1/GORAB/PSMA1/NFAM1/TNFSF13B/FGR/CD300LF/LCK/PTPN6/CD27/SAMSN1/IL12RB1/CYP26B1/LST1/IL15/ABR,3/CD47/CXCR3/CCL4/TGFB2/GPSM3/LCK/PTPN6/NUP85/CALCA/CCR1/CXCL16/ABR/C5AR1/PADI2/CLIP1/AMSAP2/TBC1D30/KDM1A/ITGB1BP1/FKBP4/MCTP1/RAC1/MYLIIP/GBA/CDK5/CD47/ANKRD13B/SPOCK1/SERPINE1/IL27RA/PAK1/TMIGD3/GNA12/ADGRG1/PRKX/LAMA5/SPRED1/RAP2B/ZNF580/THY1/RHOF,33MYADM/TGFB2/GPSM3/F3/FAM89B/VIL1/MAZ/CCR1/TUBB2B/CXCL16/PFN1/NSMF/C5AR1/GRB7/PRI1/NPFFR2/TGFA/TNFRSF11A/RELN/RFC2/MARK2/CEP85/NCAPG2/FGFR1/SLC9A3R1/CCT4/MT3/CC1ARHGAP1/CCL2/RAP1GAP2/CXCL13/SIPA1L2/ARHGDIB/PLSCR1/TBC1D30/BBC3/PMAIP1/LYN/ADRI2/HCLS1/TESK1/ITGB1BP1/ARPC5L/FKBP4/RAC1/CDK5/CHORDC1/PDGFA/CD47/PFDN2/CTTN/STM1TUBB4A/PIK3CD/CSNK1D/MKKS/KIF14/KPNB1/SV2A/CLN3/DCTN2/LYN/ZNF593/B9D2/CDK5/LAMT33/AP3D1/TRAPPC3/KATNB1/IKBKG/BTK/STX4/CBL/STK25/MY05A/CSPG5/COPG1/TRAPPC2L/NDE1,33L1/T1/DVL3/VLDLR/CPNE1/HEYL/HDAC2/RAP1GAP2/CSNK1D/FZD2/YWHAH/KIF14/CAMSAP2/KDM1A/IF3IGDIA/SCN1B/MAPT/TGIF2/RHEB/CCL3/PRPF19/ZNF335/CBFA2T2/STMN2/RASAL1/THBS2/DBNL/IF3ARK2/GDI1/EPHB3/NUMBL/FGFR1/MT3/DYNLT1/DVL3/VLDLR/CPNE1/HEYL/HDAC2/RAP1GAP2/CSN1X1A/THY1/MCRS1/UBASH3B/STX6/RAB3B/SLC51B/CCT2/LMNA/HSP90AB1/DYNLL1/DYNC1H1/CNPY1A15/NPM1/SLC39A10/SLC35F6/BRCA1/BCL2L12/XRCC2/NOL3/NPC1/LMNA/HSP90AB1/HDAC1/DDI13ID/MT3/DYNLT1/FLOT1/ACTG1/UQCC3/NCKAP1L/SH3KBP1/HSPA4/RAB1F/CSNK1D/YWHAH/MSR1/1



FB/FBX032/PIAS3/KCTD10/CDK5/WFS1/RNF26/UBE2L3/CBX4/PSMB8/RNF187/RNF157/PSMB10/P  
5/KPNB1/FHOD3/SNF8/TBC1D30/NLE1/LRFN1/DCTN2/RPL10L/RAB20/ATXN2L/RPS5/B9D2/POC1A  
5A/YWHAQ/YWHAB/RPS3/ACSL3/RPL27/SSR3/NUP155/PRKCI/RPL35/RPS20/ZMYND8/RPL18A/GZM  
MT5A/FKBP4/UNC5CL/IL1B/RAP2A/CHORDC1/WFS1/TXN/MLKL/WAS/TGFB2/TAF9/SFPQ/THOC5/CD  
3/HIP1R/TPPP3/COL5A2/ACTG1/NCKAP1L/FBX05/SH3KBP1/TUBB4A/CAP1/CAPZA1/RANGRF/CSNK  
SOCS1/PALLD/CD58/IRF1/CTLA4/CLDN10/FSTL3/CD83/CDH11/PLA2G2D/C1QTNF1/EPHB3/ZNF70  
1/WRAP73/TMEM107/ARFIP2/CEP250/HAUS6/PMP22/ATP6VOD1/NDE1/FGD1/TTC26/CKAP5/HSPB1  
L1/GSK3A/NDRG4/TNIK/TUBB2B/DVL2/PFN1/INPP5J/MAP4/NSMF/LRP8/TACSTD2/CROCC/CAPZB/I  
3MA5/PTPN6/PSMD13/PSMC4/HAUS8/PML/DYNC1LI1/PLK4/ANAPC11/UBE2D1/PSMD10/PSMD11/CDI  
ARID3A/CDC7/TUBB4B/CHEK1/RAN/NABP2/KIF18A/PRMT1/CFL1/PSMB9/MCM5/PSMD14/CHMP4B/R  
SMB5/BAD/PSMA4/ACVR1B/PSMD9/PTPN2/THBS1/PUS7/CASP8/NOTCH1/PDCD2/MYL9/HOXA5/SMAP  
/VPS28/BYSL/PARP1/YWHAQ/XPO5/YWHAB/ACSL3/CROCC/BARD1/BAG3/PRKCI/ZMYND8/GZMB/LILI  
D3/GNA12/ADGRG1/PRKX/LAMA5/SPRED1/RAP2B/ZNF580/THY1/RHOF/CORO1C/DUOX2/C3AR1/LMN  
/GPSM3/F3/FAM89B/VIL1/MAZ/CCR1/CXCL16/PFN1/NSMF/C5AR1/GRB7/PRKD2/SEMA4B/SYDE1/A  
M15B/LUC7L/RBM24/SF3B2/STRAP/LSM1/SFSWAP/POLR2E/CCAR1/KHSRP/MFAP1/PRPF4/GTF2F1/I  
M15B/LUC7L/RBM24/SF3B2/STRAP/SFSWAP/POLR2E/CCAR1/MFAP1/PRPF4/GTF2F1/DHX38/DBR1/  
M15B/LUC7L/RBM24/SF3B2/STRAP/SFSWAP/POLR2E/CCAR1/MFAP1/PRPF4/GTF2F1/DHX38/DBR1/  
VEGFA/BNIP3L/TLR2/EGLN2/UBA52/MECP2/PSMC3/TWIST1/SRF/RHOA/CD38/ACTN4/DNMT3B/PSM  
DLR1/SLC2A5/GPI/PA2G4/SERPINB1/PPIA/RAB24/ACLY/DYNLT1/CD68/NCKAP1L/ADAM8/CAPN1/  
IL12RB1/CYP26B1/LST1/IL15/ABR/MSH2/RPS3/SIT1/CST7/GRB2/CD6/DROSHA/CDC42/KAT2A/I  
FSS/CD47/PSMB8/NFAM1/PSMB10/FGR/LCP2/PSMA5/CD300LF/NRAS/WAS/LCK/PTPN6/PSMD13/PSI  
/SARNP/HTATSF1/LSM8/MAGOH/CDK11B/ARL6IP4/TBRG4/ZPR1/THOC2/RBMX/ZRSR2/HNRNPA1/PP  
/SEH1L/EIF6/IPO4/LSG1/RANBP3/THOC1/DHX38/PKD1/ENY2/GEMIN2/PABPN1/SRSF1/SRSF2/CA  
31/PTPN2

3FB2/RASSF1/RASA3/RAB10/WASF1/ARHGAP30/ABR/CADM4/SIPA1L3/YWHAQ/CDC42SE1/RHEBL1/I  
4/NCOR2/POLR2K/PSMD3/PABPC4/PPP1R15A/UQCC2/PSMD7/RPS6KB2/RACK1/VIM/TRIM71/DPH7/  
3/NAE1/BTN2A2/BTG2/PSMD8/PIDD1/SUSD2/PSMA1/CHEK2/CLSPN/PSMB5/RAD1/PSMA4/PSMD9/C  
2/NFATC4/KEL/DENND5A/DBNL/PLXNC1/DNM2/PTK2/STYXL1/FIG4/MOB2/LLPH/VEGFA/LZTS1/HSI  
L1/SFRP2/FOXF2/LAMA4/LOXL1/COL9A3/VCAM1/EFEMP2/PTK2/THBS1/NOTCH1/CAPN2/ADAMTS5  
PFN1/NSMF/C5AR1/GRB7/PRKD2/SEMA4B/SYDE1/AGO2/CALR/SEMA4D/XCL2/CMKLR1/APP/ADRA2A  
2orf65/SNAPIN/MRPL4/IST1/VPS33A/CAV1/GRWD1/CAMSAP1/CIB1/MRPS24/EIF2D/KLC1/MRPL3  
1/UBE2N/ANAPC5/CDC27/CTBP1/ATR/PARP10/MORC2/ANAPC4/TADA3/PAF1/HDAC8/IK/SMG7/UCN  
JUL4B/CLIP3/DRG1/MAPT/ARPC1A/BRK1/ARPC5/ABL1/TBCD/VCP/STMN2/TMC8/ACTR3/DBNL/PTGI  
LR1/SLC2A5/GPI/PA2G4/SERPINB1/PPIA/RAB24/ACLY/DYNLT1/CD68/NCKAP1L/ADAM8/CAPN1/C  
DYNLT1/CD68/NCKAP1L/ADAM8/CAPN1/CPNE1/C1orf35/CAP1/ASAH1/KPNB1/SLC11A1/RNASE2/R  
2F8/CSNK1E/PRMT2/E2F4/PSMB2/PIM2/PSME3/BID/CCNO/PPME1/HAUS1/BLM/FBX05/DBF4/TUBB  
HSPA2/ABL1/MTA3/NSFL1C/CHEK2/CCND3/CSPP1/ADAM17/PLK3/HNRNPU/TRIM21/GLI1/RAB11A/  
RBM15B/KPNA6/SEH1L/EIF6/IPO4/LSG1/RANBP3/THOC1/DHX38/PKD1/ENY2/GEMIN2/PABPN1/SR  
KNTC1/E2F8/LZTS2/ERCC6L/NCAPG2/NUP37/NUMBL/PPP1CA/INCENP/LEF1/RAB35/FGFR1/TXNL4  
/MAP3K6/IKBK/ZNFB675/RALB/RGS3/IGF1R/STK38/CSPG4/DBF4B/CEMIP/TRAFF7/CXCL17/PKIA/  
27/IFI16/CASP1/MAZ/GSK3A/PML/E2F2/PARP1/PSMD10/ER01A/CRIP1/LTBR/GPX1/MSH2/TNFSF  
IRE1/DCTN1/MAP1A/ADD3/LIMA1/EML2/MECP2/CDK5R1/ARHGAP28/PPM1F/DSTN/PLEKHH2/RHOA/I  
EX3D/RBM15B/RBM24/CDK11A/SFSWAP/SAFB2/KHSRP/EXOSC2/ZC3HAV1/LARP1/PABPN1/YTHDF2/  
3DEM2/RAB11A/ZPR1/RAB29/KIF20B/CACNB3/CDK5R1/UBR5/VPS11/YWHAG/ATG13/ABHD17A/ANP

3G2/KLHDC8B/KIF2A/ZNF207/CHMP1A/CALR/TDRKH/RANBP1/MYBL1/RAD21/KATNB1/MTBP/WRAP7  
RB4/IKBK/BTK/EIF2B5/ARPC1A/BTN2A2/BRK1/PSMD8/ARPC5/ABL1/FCGR2B/PSMA1/KCNN4/CSK  
RPL7A/RPS23/MYEF2/RPS10/PSMB5/PSMA4/RPS15/PSMD9/RPS16/RPL5/RPS27A/HNRNPU/RPS12/I  
/RPS4X/RPL6/EXOSC9/EXOSC10/MAGOH/RPL37/RPL27A/DXO/EXOSC7/TBRG4/RPL36/UBA52/NANO  
VF2/BRK1/ARPC5/ABL1/ACTR3/ARAP1/DBNL/PTGER4/SPIRE1/INPPL1/NEBL/ACTN1/PLA2G1B/ADI  
J/ERCC1/EXOSC10/ADD3/LIMA1/BCL2L1/PIH1D1/EML2/TRIM37/ARHGAP28/HNRNPA1/UBR5/TWIS

FADD/PELI1/RASAL3/WNT4/NF2/BTN2A2/HSPD1/ABL1/SART1/FCGR2B/AKNA/CSK/BAD/BCL10/B4  
METRN/APBB1/SRF/CAPRIN1/RHOA/RAPGEF1/ENPP2/FNBP1L/GPC2/NIN/DPYSL3/EPS8L1/AP2A1/C  
RG/ARPC5/ABL1/KCNN4/ACTR3/KEL/DBNL/DNM2/SPIRE1/VEGFA/ADD3/LIMA1/RAB11A/IFRD1/CDI  
D1/SEPHS1/TRMT12/TARBP2/TP53RK/INTS7/UTP20/EXOSC1/NOB1/NSUN4/INTS4/DDX10/TOE1/WI  
N2/MTHFR/PLK3/VEGFA/BNIP3L/TLR2/EGLN2/UBA52/MECP2/CACNB3/PSMC3/TWIST1/SRF/RHOA/  
S3/TRIM21/TARBP2/PSMC3/VPS37B/PPIE/POLR2I/PIIB/POLR2J/STXBP1/POLR2D/SIGIRR/DHX9,  
A/CD38/AP3B1/STXBP1/PDPN/TNFRSF14/RUNX3/ZMIZ1/ADORA2B/CCL19/XCL1/PIK3R6/CD5/CAV  
EXOSC10/UIMC1/MIS18A/ANXA3/GLI1/MECP2/HNRNPA1/UBR5/TWIST1/STOML2/APBB1/PPHLN1/RI  
3D1/AXL/FADD/BTK/PELI1/CLEC7A/RASAL3/GPR183/EXOSC3/BTN2A2/ZNF335/HSPD1/ABL1/SAR  
/RAD51D/WRAP53/TNFAIP3/NOP10/DCLRE1B/CSK/GAR1/HSP90AA1/RCN3/DCTN1/NOTCH1/NBN/HNI  
/THBS1/ADAM17/USF1/CHCHD2/NOTCH1/RPS27A/CAPN2/MTHFR/PLK3/VEGFA/BNIP3L/TLR2/EGLN  
311A/ZDHHC23/GOLPH3L/CACNB3/TIMM10/GORASP2/CDK5R1/RPL19/VPS37B/PARD3/NDUFA13/PP  
/HAUS8/PML/DYNC1LI1/PLK4/ANAPC11/UBE2D1/PSMD10/PSMD11/CDKN2C/PSMD1/DONSON/ODF2/I  
R1/TRAF7/SLC25A5/SFRP2/TNFAIP3/MFF/RPS7/NFATC4/TMC8/TRADD/BAD/BCL10/ERP29/CTNNA  
STXBP1/TNFRSF14/RUNX3/ZMIZ1/ADORA2B/CCL19/XCL1/PIK3R6/CD5/CAV1/TP53BP1/ATAD5/INI  
37/RNASEH1/POLE2/ATR/ATAD5/GRWD1/THOC1  
C25A5/EME2/SRPK1/ACTR3/CENPQ/BOD1/CSNK2A1/HNRNPU/RAD18/SYCE1L/CCNE2/MIS18A/RAB  
MD8/PIDD1/ABL1/PSMA1/DCLRE1B/EME2/CHEK2/CLSPN/PSMB5/PSMA4/PSMD9/CDK2AP2/NBN/PLK

PREX1/ARFGEF1/ADD1/MYO1C/SPIRE2/NCKAP1/PPP1R9A/MX1

207A/BMS1/NOL10/RSL1D1/DIMT1/EBNA1BP2/NOL9/EIF6/UTP23/RPP30/SUV39H1/SURF6/PELP1,

ACTR2/IFT140/BICD2/RAB6A/NEFH/RASGRP1/FEZ1/NEFL  
36/THOC3/HNRNPA2B1/SUPT6H/U2AF1L4/SRSF3/PNPT1/NUP214/TSC1/BICD2/IWS1/ATXN2/RFTN  
9/WDR46/IMP4/RBFA/RPS14/RPS27/EXOSC2/TAF1B/DDX52/TEX10/PWP1/RPS6/RPF1/MRM2/CHD7,  
MAD3/MYCN/ERI1/MAEL/TP53  
DIP3/THOC7/AAAS/THOC3/DYNC2LI1/ARL3/TUB/TERF1/HNRNPA2B1/SUPT6H/TTC21A/CNIH2/U2A  
NM2/DCTN1/CEP164/HAUS7/NBN/PLK3/ZFYVE19/OPTN/HAUS5/MASTL/UIMC1/DYNC1I2/RAB11A/GI  
RKRA/CAV1/DAB2IP/ATAD5/BAG6/CHAC1/BDKRB2/P4HB/TNFRSF1B/TRIM32/CASP3/RPL11/RTKN2,

IF22/PSMC3/AP3B1/CLTC/TAPBP/AP1S1/AP1S3/TAP2/AP1S2/AP2B1/LGMN/PSMC5/AP2A1/CCL19,  
IP7/RPL24/OGFOD1/ADAR/RPL11/RPL10/PRMT5/SNRNP200/DDX20/ERAL1/GEMIN8/EIF3F/MRPL2  
/RPTOR/PAGR1/PKD1

3K7/NFKBID/PSMB6/CD22/PSMA3/PDE4B/EIF2B1/CD4/RELA/PSMB7/KLHL6/PRAM1/SKP1/EIF2B

3/CNOT3/TFDP1

3TC/BECN1/ANAPC5/EREG/CNOT3/TFDP1/UBE2E2/EGF/DAB2IP/HMGA2/RPTOR/ATAD5/PAGR1/ANAI

/ZFYVE19/OPTN/HAUS5/MASTL/DYNC1I2/RAB11A/GPR132/NEDD1/MECP2/CENPJ/PSMC3

2/RPL24/RPL11/RPL10/RPS24/TRIM27/AAAS/EIF3F/RPS3A/TRIM62/RPL14/POLR2B/RPL10A/RPI

IX30/SNRPD3/TFIP11/CELF2/NIP7/RPL24/OGFOD1/ADAR/RPL11/RPL10/PRMT5/SNRNP200/DDX2

RC/POLDIP3/THOC7/AAAS/DCP2/THOC3/ZNHIT3/TERF1/HNRNPA2B1/SUPT6H/U2AF1L4/SRSF3/PNI

1/CNOT2/RPL12/RPS18/RPS28/RPS17/PPP2CA/RPL22/LSM3/RPS15A/SMG8/PARN/RPL31/PNRC2/  
P36/RPL14/DDX51/RPL10A/ZNHIT3/RRP15/WDR3/RPS28/RPS17/NOLC1/NOL11/ERI1/NSUN5P2/ZI

SRP14/ATG3/RPS18/RPS28/RPS17/RPL22/RPS15A/CHMP4A/SRP72/PEX16/RPL31

CD4/APOBEC3F

2B3/IKBKB

2AK1/EIF4G1/RPL12/EIF2B2/RPS18/RPS28/RPS17/PAIP1/EIF2B3/RPL22/EIF3C/DDX1/EIF1/RI

/ARF1/PDIA3

/PSMB1/KIF3A/PSMB6/CAPZA2/PSMA3/HLA-C/HLA-DOB/VAMP3/CTSL/CD207/PSMB7/HLA-E/RAB7.  
3/KIF24

RIM62/RPL14/POLR2B/RPL10A/RPL12/RPS18/RPS28/RPS17/NUP214/RPL22/TARDBP/RPS15A/TAI











IA/RASAL3/FGD1/RERG/RAB4B/OBSCN/BRK1/RAB3D/RHOT2/ABL1/RASAL1/RAB5C/SGSM3/DBNL/AI  
IST1/RBM14/APBB1/MLLT6/RNF8/SART3/PRMT3/DNMT3B/COPRS/DMAP1/CRTC2/POLE3/BRPF1/UBI  
/TBC1D10C/RASAL3/FGD1/WNT4/TBC1D22A/CCL3/CHN1/LIMS1/TBCD/NPRL3/RASAL1/SIPA1/ARAI  
4/FGFR3/GTPBP4/ADAM8/PAK4/VLDLR/CDKN2B/SHC1/KIF14/NLRC5/AXIN1/SLC11A1/TESK1/LYN  
3/FKBP4/MYLIP/IL1B/RAP2A/CDK5/NREP/CTTN/SPOCK1/ADRA2C/RNF157/PLXND1/ASCL2/PPP1C  
YXL1/NOTCH1/FIG4/MOB2/LLPH/VEGFA/TLR2/HSPA5/DDX56/RAB11A/KIF20B/PACSIN1/PPP2R5B,  
L27RA/HLA-DQB2/CD3E/HLA-A/PAK1/SASH3/SLC39A10/FPR1/MNDA/THY1/PILRA/SPON2/SOCS1/  
A/MAP3K14/GSK3A/TNFK/DVL2/MST1R/PSMD10/GCN1/C5AR1/LRP8/CCND2/RPS3/DUSP12/PARM1/  
1/HBEGF/PMM2/SDF2L1/CCL19/DOLK/ATP7A/EOGT/B3GALT6/HS6ST2/ARFGEF1/TMEM106A/HS2ST  
1/DMTN/DYRK3/IFNG/NSD1/TLK2/EIF4G1/PRKCB/DOCK7/RPS6KA3/WNK1/RASSF2/IKBKB/MAP3K1:  
/PSMD9/CASP8/RPS27A/MAVS/DMBT1/PAK2/TLR2/MUC6/UBA52/HLA-F/MUC15/PSMC3/UBE2D2/RBI  
SPA5/MITD1/ARHGAP28/TWIST1/EIF3E/STK3/DHX9/SNAPIN/LRPAP1/DPH3/CLIC2/EGF/CAV1/DAI

/UBE2N/TLR7/HSP90B1/IRAK2/CAV1/DAB2IP/CLEC4E/ZCCHC3/NFKBIL1/PSMB1/TLR8/MAP3K7/P:  
IAV1/PTPRC/ZCCHC3/HNRNPUL1/CXCL10/IFITM2/SKP2/TLR8/MX1/ABCF3/ADAR/PRF1/POLR3F/I



81/PSMD7/CPE/AXL/TBL1XR1/RACK1/CSNK1G2/WNT4/MED12/JRK/PSMD8/RARG/ABL1/EMD/VCP/P  
/TRIM71/TRIM25/RNF122/LONP1/EXOSC3/UBXN1/PSMD8/KLHL42/VCP/PSMA1/TNFAIP3/USP5/NSI  
1/MVB12A/PTPN23/GPX1/PSMA7/UBE2E1/FBXL6/USP1/DNAJC10/PSMB3/UBE2A/SMARCC1/ARRB2/I  
/APOO/BAD/COX19/WIPI1/HSP90AA1/VPS35/CASP8/CHCHD2/TMEM11/SH3GLB1/TOMM22/OPTN/BN  
RHGAP28/PPM1F/DSTN/PLEKHH2/RHOA/MTPN/SPTAN1/CORO2B/NOTCH2/ARF1/RHOBTB2/GMFB/HAX  
/AP3D1/FADD/STX4/CSPG5/RASAL3/WNT4/BTN2A2/EMILIN1/HSPD1/LIMS1/ABL1/SART1/SFRP2/  
DOCK7/RPS6KA3/WNK1/RASSF2/IKBKB/MAP3K12  
1/PSMB1/TLR8/MAP3K7/PSMB6/FFAR2/CNPY3/MFHAS1/ICAM2/PSMA3/IRF4/CTSL/CTSB/RELA/P  
13/RASGRP1/FGL2/LILRB2

/TAOK1/MRPL42/KIF24/MRPL22/MRPL58/MRPL38/MRPS30/GSPT1/MRPS27/SPEF1/SCIN/NAPB/MRI

D1/PRKCB/JMJD8/MUL1/SLC20A1/NOD2/PLEKHG5/IKBKB/DDX1/MAPKBP1/MIB2/MTDH/CASP10/TIG

1/TRIM25/RNF122/UBXN1/PSMD8/KLHL42/VCP/PSMA1/TNFAIP3/USP5/NSFL1C/UBQLN4/RPS7/KC  
/PAQR8/DNMT3A/CYP26B1/FOLR2/AGFG1/OSBP2/MST1R/PPP1R1B/OXTR/SPESP1/SBF1/ODF2/MSH  
IV6/DEAF1/TGFB2/POC1A/PAQR8/DNMT3A/CYP26B1/FOLR2/AGFG1/OSBP2/PPP1R1B/OXTR/SPESP  
IV6/DEAF1/TGFB2/POC1A/PAQR8/DNMT3A/CYP26B1/AGFG1/OSBP2/PPP1R1B/OXTR/VDR/SBF1/ODI  
29/KIF20B/CACNB3/CDK5R1/UBR5/TNNC1/CACNA1D/VPS11/ATG13/STXBP1/ANP32B/DHX9/DMAPI,

4K1/CAV1/MAP4K2/DAB2IP/EPHB2/PTPRC/BMP2

3GF/CAV1/DAB2IP/DKKL1/ZBED2/BMP2/RYK/PSMB1/WWTR1/PIN1/CSNK1G1/STK4/KREMEN2/PSMB1

CL3/ACHE/CEMIP/ABL1/EMD/WRAP53/MFF/PDCD10/KCNN4/BAD/CD33/PTGER4/PSMD9/VPS35/CAS1

MEN2/PSMB6

5A/CD40

EPHB2/DUSP22/EPHA10/PTPRC

EM102/EPHB2/DUSP22/EPHA10/PTPRC

3FA/CCL13/TNFRSF11A/RELN/LIMCH1/MARK2/NCAPG2/C1QTNF1/NELFE/RPS6KA4/FGFR1/ZC3H12.  
/ARHGEF11/SMAP1/PLEKHG6/ARHGAP28/ADPRH/AGAP3/RAPGEF1/ACAP3/STXBP5/DOCK2/EPHA2/S  
P1R8/ADAR/TRIM27/PHF1/AAAS/SETDB1/AGO1/MBD2/POLR2B/FXR1/ASF1A/EIF4G1/LHX2/HNRNP.





/SH3KBP1/CNOT9/ATP6V1H/SHC1/LYN/RAC1/ATP6V1E1/IL1B/ACTB/BCAR1/PDGFA/FIBP/FGR/LCI  
XL/PRDX4/ANGPT2/MMP19/KHDRBS1/HPGDS/TTC26/WNT4/SOHLH2/PIWIL4/HSPB11/RAD51C/PAFAI  
/PPP1R1B/SET/PSMD10/SMARCB1/SMYD3/CDKN2C/CADM4/YWHAB/RPS3/TFAP4/DNAJC10/ARRB2/P  
ATP6AP2/RNF213/SULF2/UBR5/PSMC3/STK3/GSKIP/RAPGEF1/IFT20/PSMC5/RBPJ/CCAR2/NPHP4,  
IAA1324/SNX5/VPS16/FEZ2/MTMR14/RAB1B/MAP3K7/STAM/CASP3/VPS26A/PIP4K2B/USP36/UBQI

MP2B/TOM1/CHMP2A/STX5/CHMP7/VPS37A/ACAP2/BLOC1S1/ALMS1/CHMP5/PICALM/DENND1C/UBC

2/NCAPG2/C1QTNF1/NELFE/RPS6KA4/FGFR1/ZC3H12A/MT3/DVL3/FLOT1/KISS1/NCKAP1L/MLST8,  
/CXCL17/ABL1/STK24/CALM2/PDCD10/CSK/CLSPN/MAPKAPK3/CCND3/DBNL/ERP29/HSP90AA1/TNI

ΓAMBPL1/SMAD2/SEN5/BAP1/SMAD3/USP33/USP24/SUPT3H/TP53/IN080E/COPS7A/RAD23A/OTUI

/ARHGDIA/SCN1B/CSPG5/SEMA3C/MAPT/TGIF2/RHEB/CCL3/PRPF19/ZNF335/LIMS1/CBFA2T2/ABI  
F/NES/GRB7/LRP8/EMB/BTBD3/SEMA4B/GRB2/PARD6B/LLGL1/CDC42/SEMA4D/SYT1/APP/NDUFS6,  
/DNM1L/SYT3/SEMA4F/GDPD5/HEY1/KATNB1/SEMA5B/STK25/ABI2/ARHGDIA/VIM/SCN1B/SEMA3C,  
S/GRB7/LRP8/EMB/BTBD3/SEMA4B/GRB2/PARD6B/LLGL1/CDC42/SEMA4D/SYT1/APP/DNM1L/MAPK'  
C3/WIPF1/NPLOC4/PSMB2/SH2B2/IRF7/ZC3H12A/PSME3/TNIP2/LAG3/FLOT1/ACTG1/NCKAP1L/SI  
S9/KHSRP/DNAJC1/RPS14/MKNK1/LARP1/YTHDF2/CDK5RAP1/CASC3/RBM4B/YTHDF1/RBM8A/METTI  
J/ECM1/CLEC7A/RACK1/IGBP1/DAP/MAPT/PDCD6/CYCS/CARD18/UBXN1/MTCH1/HSPD1/PIDD1/VC  
NFAIP3/RNF216/GNLY/TUSC2/ADAM17/ADAMTS5/MAVS/IRF5/DMBT1/OPTN/BNIP3L/PLA2G1B/OAS:  
/CDK11B/EGLN2/RAB11A/NANOS1/CRLF3/IFRD1/CDK5R1/NDUFA13/APBB1/SRF/RHOA/CD38/HBEG  
  
/USP24/SUPT3H/TP53/IN080E/RAD23A/OTUD5/NLRP3/ACTR8/NFRKB/PSMD12/SMURF2/OGT/TAB1,

33B/BIN1/SPON2/NPC1/SLC39A6/GPR107/HSP90AB1/F2RL1/ARPC2/RAB7B/SLC1A3/TIGD5/ARPC:  
/ARHGDIA/CSPG5/WDR1/SEMA3C/EPB41L3/FMNL3/SEMA3E/MAPT/FGD1/CCL3/CHN1/LIMS1/ABL1/1  
/IKBKG/DSTYK/STK25/RALB/PIFO/MAPT/CSPG4/DBF4B/CEMIP/TRAF7/EEF1A2/CXCL17/ABL1/STI  
  
WHRN/ERCC2/ZMPSTE24/CSTA

CYTH2/FLOT1/EHD1/ACTG1/NCKAP1L/SH3KBP1/VLDLR/MYO1G/ATP6V1H/CAP1/CCL2/MSR1/CLN3/  
/SSTR2/TARBP2/GORASP2/TEX11/IFT20/RNF8/ATP2B4/PRKAG1/SPATA24/DEDD/TBP/MORN2/CDY1  
/HNRNPR/POLR2D/RPLP1/DHX9/MAPKAPK5/COA3/MTPN/TIGAR/CNOT10/MEX3D/RBM24/DPH3/EIF6,  
IA4/ATF6B/PLA2G6/PARK7/SDF2/FICD/UBQLN2/RNF121/SESN2/YIF1A/RNF186/DERL1/PIK3R2/  
MAPKBP1/KAT5/C1QBP/PPP1R11/OTUD5/NLRP3/C5AR2/ARRB1/IL12A/CACTIN/SLAMF1/PDCD1LG2,

/POLR2G/MMP2/ZC3H3/ITGB5/VEPH1/PEG10/UBASH3B/CD3EAP/HGS/SOCS1/PELO/HSP90AB1/EPH1  
RP8/EMB/BTBD3/SEMA4B/GRB2/PARD6B/LLGL1/CDC42/SEMA4D/SYT1/APP/DNM1L/MAPK7/SYT3/SI

SP2/IFT20/RNF8/ATP2B4/PRKAG1/SPATA24/DEDD/TBP/MORN2/CDYL/SPATA2/RNF114/DZIP1/CII  
Γ/PDCD6/CYCS/CARD18/MTCH1/HSPD1/PIDD1/VCP/SFRP2/TRADD/BAD/BCL10/TNFSF15/THBS1/C

/ITGB1BP1/RAC1/ACTB/RAP2A/CDK5/CTTN/MYADM/PLXND1/PTPN6/RAB10/C12orf57/TNIK/TUBB;  
39H1/MORF4L1/EP400/LDB1/ATP7A/SRCAP/METTTL21A/PAGR1/TADA3/BAG6/TRRAP/PWP1/LOXL3/;

2/TRIM5/BST2/MICB/TRAF3IP1/POLR3G/GBP3/APOBEC3H/EXOC1  
AP1

4/BATF2/POLR3K/ODC1/DDIT4/LY86/PPARD/AGBL5/LDOC1/IRF7/PIM2/ZC3H12A/STAB1/TNIP2/1  
/CDC42/SEMA4D/SYT1/APP/DNM1L/MAPK7/SYT3/SEMA4F/SEMA5B/STK25/ABI2/ARHGDIA/SCN1B/;  
4/BATF2/POLR3K/ODC1/DDIT4/LY86/PPARD/AGBL5/LDOC1/IRF7/PIM2/ZC3H12A/STAB1/TNIP2/1  
?LP0/RPL18/SGTB/RPL23/NAGPA/M6PR/TIMM50/CCT8/ROM01/RPL38/PTTG1IP/MAPT/RPL23A/HSI



/NPRL3/ATG4B/NSFL1C/UBQLN4/VAMP8/BAD/WIP1/PSAP/HSP90AA1/PRKAA2/HDAC10/PTK2/CSN  
RNF11A/WIP1/NPLOC4/BATF2/POLR3K/ODC1/DDIT4/LY86/PPARD/AGBL5/LDOC1/IRF7/PIM2/ZC  
706/RPS3/ACSL3/SAMD4B/RPL27/NCL/EIF3H/AGO2/CALR/RPL35/RPS20/APP/RPL18A/PABPC4/1  
/NPRL3/ATG4B/NSFL1C/UBQLN4/VAMP8/BAD/WIP1/PSAP/HSP90AA1/PRKAA2/HDAC10/PTK2/CSN

CD8A/LILRB4/FADD/BTK/GPR183/EXOSC3/HSPD1/HLA-DOA/FCGR2B/TNFAIP3/STX7/CSK/DBNL/B

A1/CTNNA1/DNM2/PTK2/NOTCH1/MAP1A/VEGFA/RAB3A/FBXO45/RAB11A/ZPR1/TUBB3/IFRD1/CDK1  
JPS5/TRIM21/ANXA3/UBA52/MAP3K10/TRIM37/RNF25/PPP2R5B/TWIST1/ADGRG3/SRF/STK3/SIG

CLS1/BBC3/PMAIP1/CCT7/LYN/ITGB1BP1/RAC1/AKAP8L/IL1B/CDK5/TXN/UBE2L3/TCP1/ADRA2C,  
5/SNRNP70/FEZ2/PIK3CB/RAB1B/MAP3K7/CASP3/VPS26A/PIP4K2B/PARK7/USP36/UBQLN2/ULK1,

9A3R1/MT3/TNIP2/DVL3/LBH/DUSP2/KISS1/FGFR3/ADAM8/PAK4/CCL2/SHC1/AXIN1/LYN/WNT7B,  
D11/FPR3/MUC3A/RAC1/CBFB/PSMB4/IL1B/ACTB/BCAR1/CTSS/CD47/PSMB8/NFAM1/PSMB10/PHB,  
42EP2/TRPM4/PPP1R15A/SEMA4F/GMFG/SCTR/SEMA5B/AKT1S1/ABI2/WDR1/SEMA3C/SEMA3E/MAP  
PSMB3/SDHAF2/ARRB2/CDC42/APCDD1/AGO2/CTDNEP1/ZMYND8/APP/PSMD4/TRPM4/PSMD3/RBX1/1

AT1/SIPA1/TMC8/DBNL/HSP90AA1/ACVR1B/DNM2/ADAM17/CSNK2A1/CCDC85B/NPPB/LLPH/ARHGEI

ALD1/PPP1R7/SSU72/HSP90B1/PPP1R14C/DUSP18/HTT/CALM3/ENSA/DUSP22/PTPRC/CTDP1/MTMI

2/IFNG/TERF1/IP07/DUSP14/RGS4/CHMP6/WNK1/PPP2CA/TSG101/TP53/PRKAR2A/SMCR8/DUSP2

9A3R1/MT3/TNIP2/DVL3/LBH/DUSP2/KISS1/FGFR3/ADAM8/PAK4/CCL2/SHC1/AXIN1/LYN/WNT7B,

4K2/DAB2IP/HMGA2/RPTOR/CALM3/CIB1/PKD1/PTPRC/BMP2



/MGME1/DCP2/AGO1/PAM16/DNASE1/CNOT2/ERCC2/PNPT1/ERI1/ZNRD1/DDX1/TDP2/HARBI1/TRE.



A/PTPRC/BMP2/ADCY3/ADNP/PIK3CB/ADCY7/LPAR1/STK4/MAP3K7/UCN/CCDC88A/COPS8/MADD/P,

TRN/PARD3/APBB1/SRF/RHOA/STXBP1/ROBO3/NIN/NRTN/SPTAN1/EPHA2/ARTN/IST1/NEO1/EPHB;

/RAB22A/ANXA8L1/ANXA1/VPS33B/MAPK15/VAMP1/NKD2/TMEM127/TFG/DNAJC13/CNIH2/RAB7A/

OR4X2/OR1E1/OR5AK2/OR4C3/OR10J5/OR2C1/OR1N2/OR7D2



32E3/WWP2/ARIH2/RNF126/PSMB7/RNF115/SKP1/ANKIB1/MKRN1/RNF186/RNF19A/TRIM56/NOD2,  
K9/NOD1/SEMA4C/MAP4K4/DUSP15/MAP3K11/ZMPSTE24/MUL1/NOD2/HDAC3/RASSF2/IKBKB/MAP3I

/C9orf116/TMEM109/UIMC1/FNTA/HSPA5/BCL2L1/MECP2/INTS7/LZIC/ACTR5/IFT20/RNF8/DNM  
A/PSME3/HSPBP1/MT3/BCAP31/ATG101/MLST8/ADAM8/TRIM65/CAPN1/PIP4K2A/LAMP3/ATP6V1H,

TD1A/MAEL/RAB6A/GNAS/IWS1/NSUN5P2/METTL2B/METTL6/SUZ12/SETMAR/THUMPD3/MEN1/TARBI

PK3/CSNK1D/AXIN1/SLC11A1/CCDC22/VDAC1/MYLIP/ATP6V1E1/PSMB4/IL1B/GBA/LAMTOR5/CAP1

/HOXB7/HOXD9/HEY1/TBL1XR1/TMEM107/MSX1/SEMA3C/RIC8A/TRIM71/TFAP2A/PDCD6/MED12/PI  
ITLG/SSX2IP/NOTCH2/RHOBTB2/DAB2IP/ARHGEF17/PREX1/ARHGAP22/EPHB2/ARFGEF1/ARHGAP1'

CXCL16/PSMD10/CDKN2C/RUVBL2/SEMA4B/CDC42/SERTAD3/SEMA4D/SYT1/APP/GAL/SYT3/SEMA4  
?/IGF1R/PDCD6/STK38/NF2/BTN2A2/EMILIN1/GRINA/ABL1/VHL/NPRL3/RASAL1/SFRP2/TNFAIP;

31B/TLR2/CD2AP/EDEM2/ZPR1/RAB29/KIF20B/GOLPH3L/CACNB3/ALOX15B/CDK5R1/UBR5/TWIST  
ITGB8/RIC8A/ABCG1/EMILIN1/COL11A1/ABL1/SFRP2/FOXF2/LAMA4/LOXL1/COL9A3/VCAM1/EFEI

3/OCRL/PCGF2/HOXB7/HOXD9/HEY1/TBL1XR1/TMEM107/MSX1/SEMA3C/RIC8A/TRIM71/TFAP2A/PI



TH2/SLC39A13/HLA-DQA2/CSNK1D/SLC35B2/KDELRL1/CLN3/SLC35A2/UXS1/HLA-DRB5/B4GALT7/1  
JC6/NSMF/SMARCB1/CPSF6/KMT5C/ZMIZ2/TIPIN/MSH2/CHD4/RUVBL2/CENPB/POLE4/RBBP4/POL  
DYNC1H1/RAB7B/FMOD/CLCN7/MFSD12/NPC2/SORT1/PLBD2/PA2G4/GPR137B/VMA21/ACLY/FLOT1  
3P7/RPA2/DPF2/INO80C/TIMELESS/POLR3D/EXOSC3/SUV39H2/ESCO2/RARG/MTA3/EME2/SFR1/LI  
KDC/RUVBL1/MAD2L2/HIF1A/CHTF18/CBX1/CENPE/UBE2I/CHD3/PES1/PPP2R1A/PAK1/ACD/RBBP  
P1CA/BRIX1/LDOC1/RRP7A/PA2G4/XPO6/POLR2H/FGFR1/FBL/DDX27/EEF1D/PNKP/BLM/NOP2/AA  
DYNC1H1/RAB7B/FMOD/CLCN7/MFSD12/NPC2/SORT1/PLBD2/PA2G4/GPR137B/VMA21/ACLY/FLOT1  
EEF1A2/RAB3D/HLA-DOA/NPRL3/ABCY9/STX7/VAMP8/RAB5C/PSAP/VPS35/CFTR/MCOLN3/CCZ1B/  
LB1L/HGS/NPC1/CCT2/C3AR1/HSP90AB1/DYNC1H1/RAB7B/FMOD/CLCN7/MFSD12/NPC2/SORT1/PL  
F2/CHD4/RUVBL2/CCDC77/CROCC/CDC42/KAT2A/MZT2B/RANBP1/CETN2/ACTL8/KATNB1/WRAP73  
RAP1GAP2/AUNIP/CSNK1D/ATF4/CDK2/MKKS/NLRC5/CAMSAP2/TBC1D30/DCTN2/CDC42BPG/ITGB  
RAD21/KATNB1/IKBKG/TBL1XR1/VRK1/HAUS6/NDE1/CKAP2/CKAP5/PRPF19/MZT1/IQCB1/HSPA2/  
LYN/TSPAN4/ARPC5L/TNC/RAC1/ITGA2/RPS5/ACTB/GNB2/BCAR1/CTTN/KIFC3/RPL7/MCAM/CDH  
HLA-B/ATP6V0E1/PRM1/LLGL1/STARD3/VPS18/CHMP1A/VPS25/SLC9A7/OCRL/CTSD/AP1G2/SH  
ECE2/CD58/C3AR1/DYNLL1/RAB7B/TGFA/COPE/NBEAL2/SORT1/OLR1/STX10/SLC2A5/RAB35/VMA  
3P2NL/NEB/SIPA1L3/KPTN/NCOA5/PARVG/CROCC/CAPZB/BAG3/SMTN/LLGL1/FHOD1/CNN2/VPS18  
VPB/PRPF3/PRPF6/BARD1/USP22/CBX5/ARHGAP18/TOBP1/SF3A3/NCOR2/PCGF2/HOXB7/TELO2/  
SLC17A5/BCL2L1/HLA-F/RAB11A/YIPF2/COPB2/CLTC/AP1S1/STXBP5/GOSR2/RAB27B/ATG9A/CO  
2A/SERPINE1/TCIRG1/SLPI/FUCA2/CD63/DOK3/STK11IP/RNASET2/FPR1/STX1A/MNDA/PTGES2/  
FA/COPE/NBEAL2/SORT1/OLR1/STX10/SLC2A5/RAB35/VMA21/HIP1R/PAM/RAB24/STAB1/SRI/CD  
IC2/BRCA1/RBL1/NSMCE2/PCNA/MCRS1/XRCC2/CHAF1A/SGO1/SMARCA4/ACTL6A/IRF1/COPS9/ARI  
PPP6R1/GPSM1/B3GNT7/RAB7B/TGFA/FMOD/CHPF2/COPE/TMED9/PSENEN/SORT1/STX10/PLOD3/  
SLC36A1/RNASE2/HLA-DRB5/RPN2/SLC26A11/ATP6V1E1/GBA/GNB2/LAMTOR5/CTSS/LAMTOR1/TM  
2S1/UBA1/SNX27/ATP6VOC/APH1B/MVB12A/HLA-B/ATP6V0E1/PRM1/LLGL1/STARD3/VPS18/CH  
MSH2/CHD4/RUVBL2/CENPB/POLE4/RBBP4/POLA1/TBX19/DFFA/UBE2A/SMARCC1/BRD9/KAT2A/BI  
AMP3/RANGRF/RAP1GAP2/CSNK1D/SNF8/PLSCR1/AXIN1/PSTPIP1/LYN/ITGB1BP1/ATN1/PKN3/FI  
FZD2/JAG1/LYN/TSPAN4/ARPC5L/TNC/RAC1/ITGA2/RPS5/ACTB/GNB2/BCAR1/CTTN/KIFC3/RPL  
33GALNT1/RAB35/PITPNM1/ST3GAL4/ARF3/PAM/ARFGAP1/BCAP31/CHST10/CYTH2/SLC39A13/HL  
EEF1A2/RAB3D/HLA-DOA/NPRL3/ABCY9/STX7/VAMP8/RAB5C/PSAP/VPS35/CFTR/MCOLN3/CCZ1B/  
IS/TPM3/MAP2K2/CENPE/PAK1/NUDC/NARF/KLC3/MMP2/TUBB6/CORO1C/TUBA1A/TUBB2A/TTL1/  
IS/TPM3/MAP2K2/CENPE/PAK1/NUDC/NARF/KLC3/MMP2/TUBB6/CORO1C/TUBA1A/TUBB2A/TTL1/  
FLOT2/CANT1/BRSK1/IQGAP1/RAB15/CLTA/CFD/OLA1/FTH1/STXBP2/PSMD2/TFF3/ITGAX/SYT8  
MAP2K2/CENPE/PAK1/NUDC/NARF/KLC3/MMP2/TUBB6/CORO1C/TUBA1A/TUBB2A/TTL1/BIN1/PAI  
37/TIGD5/ARPC3/BEX4/WIPF1/LZTS2/MARK2/PDLIM3/SH2B2/KRT18/INCENP/CORO1B/KIFC2/CC  
28/RBMX2/POP1/TAF9/LSM2/MRPS34/FBXW9/RPL39/EDC3/ISY1/BYSL/RPL35A/RNF113A/MRPL13  
JUNB/TFPT/TRPS1/ASXL1/USP3/TTI1/IRF4/HNRNPC/ING2/MYC/YY1AP1/MBD2/ASF1A/MAX/REL  
2/ZNF207/DNAL4/FHDC1/DNM1L/KATNB1/SCTR/MYO5A/CCT8/HAUS6/NDE1/MAPT/CKAP2/CKAP5/K  
CNN2/CDC42/CALR/MTF2/SPRY4/AFAP1/RPS19/RPLP0/RPL18/CBL/RPL23/VIM/ITGB8/RPL38/CSI  
CDC42/CALR/MTF2/SPRY4/AFAP1/RPS19/RPLP0/RPL18/CBL/RPL23/VIM/ITGB8/RPL38/CSPG4/S  
CNN2/CDC42/CALR/MTF2/SPRY4/AFAP1/RPS19/RPLP0/RPL18/CBL/RPL23/VIM/ITGB8/RPL38/EPI  
ADGRG3/EXOC3/SIGLEC9/RHOA/CD38/RAB27B/MANBA/COPB1/BRI3/TMEM184A/ITGAL/ATP11A/C  
FGD1/CSPG4/NF2/BRK1/ARPC5/ABL1/STMN2/KDF1/SGCE/PALM/ACTR3/WWC1/DBNL/CTNNA1/SRG  
CKAP5/SUV39H2/EID3/ESCO2/SEC13/PTGES3/NAT10/DNA2/DOT1L/RAD51D/WRAP53/DCLRE1B/G  
ISD/AP3D1/AP1B1/CCZ1/ABCC10/M6PR/TMEM199/GNB4/ATP6VOD1/NSF/HPSE/SLC48A1/RHEB/VM  
RPL11/RPL10/RPS24/MRPL3/RPS3A/AURKAIP1/MRPL20/ABCF1/RPL14/MRPL24/MRPS16/RPL10A  
29/EIF2D/BAG6/RPL13/PIN1/RPL4/RPL41/RPL9/RPS6/MAP3K7/RPL24/RPL11/RPL10/RPS24/RP

/SNRNP35/ZCRB1/SMU1/AAR2/PRPF40A/AKAP17A/XAB2/SYF2/PTBP2/HNRNPH1/CWC15/WDR83/CRI  
322/RPL12/MRPS2/RPS18/RPS28/RPS17/RPL26L1/RPL22/GEMIN5/MRPL21/RPS15A/MRPS26/MRP'

TP6AP1/CD63/ABCB6/CHMP4C/FGFR4/ANKRD27/RAP2B/FCHSD1/CORO1C/TUBA1A/STX6/SCAMP4/R  
1/POLR2L/USP22/JADE2/KCTD2/KAT2A/CBX5/MTF2/TMEM258/ATXN7L3/PRIM2/CBX8/POLR2K/DCI

MAD5/ATF6B/NCOA6/TCEA1/GTF2A2/ING2/POU2F1/EYA3/NR6A1/HYAL2/MAX/RELA/HOXB13/SMAD  
VTXR1/DOCK8/NCKAP1/CASK/UTRN/ABCA7/KCNC4/EFCAB7/GPR161/THEM4/NOX1/ATP2B1/VEZT/PI

ERS6/ATP2A3/PLCD4/NEMP1/SEC13/AKIRIN1/ABL1/EMD/GHRHR/TMC8/LEMD2/TOR2A/PRPF38A/DI

1/PWP2/TAF1A/CRIPT

/EPB41/CAPZA2/RHOH/C2CD2L/MYO1D/TCHP/DMTN/MED28/KCNC3/RHOD/TSC1/EXOC6/MYO1A/ACTI

/AP2A1/TLR7/HSP90B1/RAB9A/PDIA3/SNX3/CAV1/RAB13/ATP7A/DAB2IP/PLD1/MYO1C/RAB8B/LI

SYT17/AFTPH/COG5/STX16/TRAPPC9

R3IP1/YIPF5/CCDC88A/HLA-C/IGF2R/VAMP3/CD4/CD207/VPS33B/ARCN1/HLA-E/YIF1A/CNIH2/  
ITGA2/VDAC1/ACTB/CDK5/WFS1/STRN4/CTTN/SPOCK1/RPL7/ADRA2C/HOMER1/CACNG4/CLTB/PPP  
CA/PAFAH1B2/ARPC5/VCP/VCL/APRT/BIN2/DBNL/HSP90AA1/THBS1/SRGN/MAN2B1/OLFM4/CYB5R

15/TAP2/TOE1/ZMIZ1/RBM10/RBM15B/MECOM/CDC34/CDYL/SF3B2/POMP/SAP130/MORF4L1/EP40

PIN/PREX1/CALM3/CIB1/SLC9A6/KLC1/CNR1/TNFRSF1B/KIF3A/PPP1R9A/UTRN/ADGRL1/UCN/KCI

X4/CCT8/HPSE/S100A7/GCA/PAFAH1B2/ARPC5/VCP/VCL/APRT/BIN2/GNLY/DBNL/HSP90AA1/THB  
/SPIRE1/CCSAP/DCTN1/CAPN2/HNRNPU/MAP1A/CTBP2/ADD3/MYO6/CANX/GLI1/ARL8B/PARD3/WI  
EZ1/NEFL

DC16/MIB2/DERL3/ARMC8/SMURF2/RNF40/ASB2/LZTR1/CDC26/GID8/KLHL22/ANAPC1/WDR26/PC

4/CCT8/HPSE/S100A7/GCA/PAFAH1B2/ARPC5/VCP/VCL/APRT/BIN2/GNLY/DBNL/HSP90AA1/THB

53/TBPL1/TAF11/GTF2E1/PRKAR2A/SMCR8

/TRMT10C/IMMT/MRPL22/MRPL58/MRPL38/MRPS30/CHCHD6/MRPS27/NDUFB7/COX6A1/NDUFA11/M

1/RAB7A/CHMP6/CYB561A3/SLA2/ANKRD13A/TSG101/STOML1/CHMP4A/MCOLN1/CLEC16A  
1/FKBP4/RAC1/PDE9A/PIAS3/CDK5/WFS1/STRN4/DNER/CTTN/ADRA2C/RPL28/GNB1/HOMER1/TG

PRS/TSC1/SORCS2/ACTR2/NEFH/BCL11A/DVL1/NLGN4X/LRP4/ARRB1/ARHGAP44/ABI1/CRTC1/LR

W2/APOBEC3H/PSMC2/DIS3L2/CTSH/PSMA6/RBM4/HOXD10/EIF2S1

1/RNF19A/CADPS2/RPL22/UNC13A/GRIPAP1/HIP1/DAG1/C1QBP/DVL1/NLGN4X/WNT5A/PPP3CB/C

2/NEFH/BCL11A/DVL1/NLGN4X/LRP4/ARRB1/ARHGAP44/ABI1/CRTC1/LRFN3/STAT3/PCBP2/GAP4:

GIP1/PRKAA2/NOTCH1/ZNF711/MBD3/HNRNPU/RNF2/CTBP2/THRA/UBTF/SREBF1/CSNK2B/GLI1/TI  
MYBBP1A/TFAP2A/NFYC/WNT4/MED12/RERE/POU2AF1/MEIS2/TAF12/ARID5A/RARG/CBFA2T2/ABL  
STYK/STK25/VRK1/CSNK1G2/IGF1R/STK38/OBSCN/CCL3/CDK19/ACVR1/FASTK/ABL1/STK24/PIM:  
3/RPL39/TUBB2B/EVPL/MAP4/RPL35A/BGN/TUBG2/COL6A2/PSMD11/MRPL13/NEB/ODF2/RPS3/CR  
D5/GMFG/STX4/RACK1/ARHGDI1/RIC8A/RGS3/TBC1D10C/RASAL3/TBC1D22A/DBF4B/CCL3/CHN1/  
3RSK1/GPAA1/PPP1R18/ARPC4/PROM1/RGS14/RAB25/PLEC/LCP1/MAP1S/TPM3/MAST2/CENPE/FAI  
/GSK3A/CDK18/NUAK2/TNIK/SLA/FGFR2/CIT/ALDH18A1/PLK4/MST1R/STK32C/LMTK3/CDK7/COA:  
HOF/EFTUD2/ABCF2/XRCC2/TUBA1A/TUBB2A/SMARCA4/RAB3B/RASEF/DYNLRB1/HSP90AB1/DYNLL  
HOF/EFTUD2/ABCF2/XRCC2/TUBA1A/TUBB2A/SMARCA4/RAB3B/RASEF/DYNLRB1/HSP90AB1/DYNLL  
HOF/EFTUD2/ABCF2/XRCC2/TUBA1A/TUBB2A/SMARCA4/RAB3B/RASEF/DYNLRB1/HSP90AB1/DYNLL  
C2/TUBA1A/TUBB2A/SMARCA4/RAB3B/RASEF/DYNLRB1/HSP90AB1/DYNLL1/DYNC1H1/RAB7B/XRCC:  
1/KCNQ1/ATF4/KIF14/SV2A/HCLS1/AXIN1/GLRX3/TESK1/DCTN2/ITGB1BP1/GPRC5B/LDHA/RAC1,  
P1/GPRC5B/RAC1/VDAC1/ACTB/BCAR1/CDK5/MLKL/FAM83H/FGR/WAS/LCK/PTPN6/PPP1CC/GSK3A,  
2/YWHAH/KIF14/KPNB1/SYNGR3/PLSCR1/HCLS1/AXIN1/U2AF2/SRSF9/LYN/ATN1/CARD11/EHMT2,  
2/SLPI/PPP2R1A/NPM1/SPRED1/ANKRD27/PCNA/THY1/NSMAF/ARHGAP9/PPP2R2C/SIRPA/NOL3/S:  
K4/ARHGAP1/LYPLA2/CAPZA1/CSNK1D/SH3GLB2/LYN/TSPAN4/ITGB1BP1/ATXN2L/HCF1/LDHA/I  
C1/LLGL1/INF2/RANBP1/CDC42SE2/CDC42EP2/MYO9B/OCRL/DNM1L/SH3GL1/TRAPPC3/RALGDS/AI  
NF2/ARPC5/TNNI3/ABL1/EMD/VCL/ZNF185/ACTR3/DBNL/VASH1/CTNNA1/PTK2/SPIRE1/SSH2/INI  
/STK3/NEK6/GAK/PRKAG1/MAP3K1/MINK1/MAPKAPK5/PHKA2/GTF2H1/PHKG2/ADCK5/SBK1/CDK11,  
D18/HSPA5/DYNC1I2/HSPA14/KIF20B/RNF213/KIF22/PSMC3/RFC5/TAPBP/ATP2B4/TAP2/DHX9/  
L3/PARD6G/SERGEF/PIFO/BICDL2/FGD1/NSF/TBC1D22A/OBSCN/BRK1/IP013/DENND3/TBC1D7/DI  
L3/PARD6G/SERGEF/PIFO/BICDL2/FGD1/NSF/TBC1D22A/OBSCN/BRK1/GGA1/IP013/DENND3/TBC

RHGAP28/ADPRH/AGAP3/RUNDC3A/GPS1/ACAP3/STXBP5/DOCK2/SGSM1/RANBP3/DNAJC1/DAB2IP/1  
C/PHF6/EML2/KIF20B/CENPJ/KIF22/CDK5R1/ARL8B  
IM25/STK38/RPL23A/CKAP5/ACVR1/STK24/EMD/VCL/RPL7A/CDH24/TXNDC9/DBNL/MPP7/CTNNA1,  
TB2/RAB9A/RAB40C/RAB13/ARL1/RAB1A/RAB36/GNA13/RAB8B/RAB1B/MX1/GPN1/GTPBP1/RHOH/1  
AP22/ARHGAP27/RIC8B/ARHGAP17/LLGL2/RALBP1/ARHGAP33/EVI5L/ASAP3/RALGAPB/TBC1D20/1

A7/MRPS11/RPL31/MRPL42/MRPL22/MRPS30

2BPG/CHRA1/PKN3/PRIM1/CARD11/NAGK/ALPK3/PFKM/CDK5/MLKL/FGR/MAPK11/PI4KB/LCK/FL  
NRNPLL/GEMIN5/TP53/TARDBP/GRSF1/C1QBP/PARN/TDRD7/MRPS11/NOVA1/TPR/RNF40/PURB/EI1



ER2/CIT/PLK4/MST1R/STK32C/LMTK3/CDK7/COASY/MATK/CCND2/PRKD2/STK10/CHKA/PRKCI/GRI  
MO2/TNFRSF1B/TRIP4/PXN/STAM/SMAD5/LRPPRC/RPL11/MFHAS1/CKB/SYT11/EIF4E2/PSMA3/EGF

5/LRPPRC/RPL11/MFHAS1/CKB/SYT11/EIF4E2/PSMA3/EGR2/RELA/NKD2/TRAF1/BLZF1/SMAD2/DI

3/ARL8B/AGAP3/RHOA/ARF5/GMPPB/MRAS/ACTN4/RAB27B/BMS1/NIN/IFT22/ARF1/LSG1/MFN1/RHOB  
AP3/RHOA/ARF5/GMPPB/MRAS/RAB27B/BMS1/NIN/IFT22/ARF1/LSG1/MFN1/RHOBTB2/RAB9A/RAB

75/GMPPB/MRAS/RAB27B/BMS1/NIN/IFT22/ARF1/LSG1/MFN1/RHOBTB2/RAB9A/RAB40C/RAB13/G  
75/GMPPB/MRAS/RAB27B/BMS1/NIN/IFT22/ARF1/LSG1/MFN1/RHOBTB2/RAB9A/RAB40C/RAB13/G

5BPL2/TWF1/GBF1/SH3PXD2A

RAB27B/BMS1/NIN/IFT22/ARF1/LSG1/MFN1/RHOBTB2/RAB9A/RAB40C/RAB13/GTPBP6/ARL1/RAB

PAP1/KITLG/ARTN/EREG/CCL19/XCL1/MRAP2/BMP8B/COPA/CCL3L3/GMFB/CRLF1/OSM/IL17D/CC

5/GMPPB/MRAS/RAB27B/BMS1/NIN/IFT22/ARF1/LSG1/MFN1/RHOBTB2/RAB9A/RAB40C/RAB13/G  
5/GMPPB/MRAS/RAB27B/BMS1/NIN/IFT22/ARF1/LSG1/MFN1/RHOBTB2/RAB9A/RAB40C/RAB13/G

/PRPF6/KAT2A/MED24/CBX5/CALR/ZMYND8/NCOR2/MED25/RBX1/DDX54/FUS/HEY1/DR1/RPL23/RI

SRA1/NCOA6/GTF2A2/PPRC1/PARK7/TFEC/SCAND1/MED20/BRD7/HYAL2/MAX/MED30/PRKCB/MED1  
R1/RPAP1/DDX52/PTRHD1/DHX8/DHX30/METTL3/CARS2/MOV10/QRSL1/SARS2/MRM2/PPP1R8/RTC

OR4X2/OR1E1/OR5AK2/OR4C3/OR10J5/OR2C1/OR1N2/OR7D2

/FBXO10/KCMF1/TRIM32/CDC23/TRIM27/SH3RF1/NEURL1/RNF149/EGR2/RNF144A/BRAP/BCOR/UI

32F2/PARP1/OTX1/SMARCB1/SMYD3/CRIP1/ZNF239/VDR/MYPOP/MSH2/ZBTB17/BATF3/CHD4/RUVI

C1A/CHMP3/GSK3A/HAUS8/DYNC1LI1/TUBB2B/PLK4/INPP5J/MAP4/TUBG2/RAE1/KIF2A/ODF2/RP  
NABP2/KIF18A/PRMT1/CFL1/PSMB9/MCM5/PSMD14/TIMP2/CHMP4B/RHOC/ESPL1/POLA2/BAX/BCA  
M5/MARK2/GDI1/EPHB3/PLOD3/NUMBL/CORO1B/LEF1/SLC9A3R1/MT3/DYNLT1/DVL3/FLOT1/NCKA  
3/FERMT1/FLOT1/NCKAP1L/ADAM8/HDAC2/PIK3CD/ATF4/NLRC5/FRMD8/KDELRL1/SLC11A1/LYN/C  
/NLRC5/FRMD8/SLC11A1/LYN/CARD11/GPRC5B/RAC1/IL1B/GBA/CD47/RNF26/NFAM1/FGR/MAPK1  
1/NFATC4/BCL10/PTGER4/TUSC2/THBS1/ADAM17/CASP8/MAVS/IRF5/IL20RB/TLR2/HLA-F/ATP6  
1/SEMA3C/TRIM71/TIMELESS/SEMA3E/TFAP2A/WNT4/MED12/OVOL2/PSMD8/ACVR1/LUZP1/RARG/  
/PRSS3/DYNLL1/DYNC1H1/ILF2/AMPD3/NPC2/NBEAL2/OLR1/SLC2A5/LEF1/GPI/PA2G4/SERPINB  
AMPD3/NPC2/NBEAL2/BATF2/OLR1/SLC2A5/GPI/PA2G4/SERPINB1/PPIA/ZC3H12A/RAB24/ACLY/  
/CPNE1/C1orf35/CAP1/PIK3CD/ASAH1/KPNB1/SLC11A1/RNASE2/LYN/RAC1/CTSS/LAMTOR1/GNS  
AC1/CTSS/LAMTOR1/GNS/CD47/FTL/NFAM1/FGR/PSMA5/NRAS/SERPINB6/PTPN6/PSMD13/AGPAT2  
/PRSS3/DYNLL1/DYNC1H1/ILF2/AMPD3/NPC2/NBEAL2/OLR1/SLC2A5/LEF1/GPI/PA2G4/SERPINB  
GS1/SPON2/HK3/CCT2/CD58/C3AR1/HSP90AB1/F2RL1/PRSS3/DYNLL1/DYNC1H1/ILF2/AMPD3/NP  
1A1/RNASE2/RAC1/CTSS/LAMTOR1/GNS/CD47/FTL/NFAM1/FGR/PSMA5/NRAS/SERPINB6/PTPN6/P  
CLS1/FANCA/JAG1/MITF/LYN/CARD11/CBFB/CDKN1C/PSMB4/PIAS3/IL2RA/NCAPH2/PSMB8/NFAM  
L3/MFNG/LFNG/ABL1/SART1/HLA-DOA/FCGR2B/TOX/BAD/PTGER4/VCAM1/TUSC2/PTPN2/ADAM17/  
MAPK3/CD276/EFNB1/SERPINE1/IL27RA/HLA-DQB2/CD3E/HLA-A/ATP6AP1/PAK1/SASH3/ISG15/  
CD79A/UBE2D1/PSMD10/PSMD11/PSMD1/C5AR1/PSMA7/RPS3/PRKD2/TRAFF3/PSMB3/GRB2/ARRB2/  
/KCNN4/CSK/ACTR3/PSMB5/BCL10/PSMA4/SPPL3/HSP90AA1/PSMD9/PTK2/PTPN2/PAK2/MUC6/RA  
ZNF93/TOP1MT/ACTL6A/CCT2/HSP90AB1/XRCC3/TICRR/E2F8/HDAC1/PARPBP/NPLOC4/CSNK1E/R  
7/POLD3/INO80C/TRIM25/TIMELESS/EID3/PRPF19/ESCO2/RAD51C/BTG2/DNA2/ABL1/RAD51D/V  
BRD9/USP22/JADE2/VCX/KAT2A/BEND3/CABIN1/MTF2/ATXN7L3/CBX8/HELLS/PCGF2/HMGN1/PPP  
L35A/RTCA/LYAR/INTS1/USP14/THOC6/RNF113A/RRP36/PTBP3/CPSF6/EIF4A3/ISG20/CDK7/PR  
ARP4B/NAT10/EEF1A2/MRPL53/MPV17L2/GSPT2/RPS7/FARSA/RPL7A/RPS23/RPS10/MRPS17/MRP  
RG1/SLPI/FUCA2/ATP6AP1/PAK1/CD63/DOK3/STK11IP/RNASET2/FPR1/STX1A/MNDA/PTGES2/RA  
PSM3/PLXND1/F3/NUP85/CALCA/CCR1/TUBB2B/CXCL16/USP14/LOX/C5AR1/PADI2/GRB7/PF4V1/  
2F4/REXO4/DDIT4/POLR2H/IRF7/CBX3/ZC3H12A/BID/PNKP/BCL3/OTUB1/BLM/FBXO5/AATF/CNO  
/BLOC1S4/DYNLT1/GPSM2/HAUS1/FBXO5/SPAG1/RSPH1/TUBB4A/RANGRF/AUNIP/CSNK1D/DNAAF5  
/BLM/FBXO5/AATF/TUBB4A/CNOT9/CDKN2B/CCL2/DAPK3/CSNK1D/ANAPC7/CDK2/LSM10/KIF14/N  
NF580/MMP2/PDCL3/CD248/COPS9/STAT1/TGFA/HDAC1/E2F3/NACC1/TNFRSF11A/S100B/WDR77/  
SF3B3/SUGP2/HNRNPR/POLR2D/SART3/DHX15/TGS1/GPKOW/KHDRBS3/TSEN34/DHX9/RBM28/CCAR  
BA52/CD2AP/EDEM2/PSMC3/CHFR/AGAP3/GLMN/ANKZF1/TMUB1/PSMC5/FAF1/CCAR2/SDF2L1/FBX  
DX11/CEP85/E2F4/PSMB2/INCENP/FGFR1/CBX3/PSME3/BID/GPSM2/HAUS1/BLM/FBXO5/DBF4/TU  
C1A/VIL1/GSK3A/PML/NAP1L2/PLK4/ANAPC11/PFN1/WASF1/SMARCB1/NES/YWHAQ/RUVBL2/YWHA  
ASP1/GSK3A/PML/PARP1/ABR/APH1B/LTBR/VDR/TNFSF12/YWHAQ/YWHAB/RPS3/TFAP4/DFFA/BAR  
KRT8/HTATIP2/KPNB1/SNF8/PLSCR1/CD209/LYN/HCF1/SSB/RAB11FIP4/RAC1/ITGA2/VDAC1/R  
NF113A/PSMD11/PTBP3/CPSF6/EIF4A3/PSMD1/C5AR1/CDK7/PSMA7/PRPF3/EXOSC5/YWHAB/SNU1  
/DAP1/CRTC2/POLE3/BRPF1/UBE2N/MECOM/CTBP1/SUV39H1/MORF4L1/EP400/LDB1/PCGF3/SRC  
T1/CCL13/TNFRSF11A/IFI35/PSMB2/SH2B2/KRT18/NUMBL/RPS6KA4/IRF7/PPIA/PSME3/MT3/TN  
P1/SWAP70/DNM1L/SH3GL1/KATNB1/RPL23/VRK1/MMP19/GADD45GIP1/WDR1/MRPL10/IGF1R/MRP  
10/KRI1/RPS7/SRPK1/RPL7A/RPS23/WDR55/GAR1/RPS10/DDX23/SEN3/EIF3K/HSP90AA1/PRKA  
G1/SRI/NCKAP1L/MLST8/TNNI2/SH3KBP1/CAP1/CAPZA1/RTKN/SHC1/KCNQ1/DAPK3/KRT8/MKKS/  
1/NDE1/FGD1/TTC26/CKAP5/HSPB11/BRK1/IQCB1/AKIRIN1/TMEM216/ABL1/VCL/PALM/ACTR3/A  
HC1/DAPK3/KRT8/MKKS/ARHGDIB/FHOD3/HCLS1/PSTPIP1/TESK1/CDC42BPG/ITGB1BP1/ARPC5L/  
MB8/NFAM1/PSMB10/ETV6/PSMA5/TGFB2/CDH17/LCK/PTPN6/THOC5/PSMD13/CD27/IFI16/PSMC4  
AF1/ZNF16/ADD1/PPARG/JUNB/ACIN1/MOV10/RPS6/CASP3/ADAR/SMAD5/MFHAS1/NCOA6/DPY30/  
/LEF1/PDCD1/TGM2/ZC3H12A/LAG3/FERMT1/SIRPG/FLOT1/NCKAP1L/JAG2/GTPBP4/ADAM8/CCL2  
2/TAF9/POMT2/PSMD13/ADAMTS9/PSMC4/GSK3A/AP2M1/OSBPL7/PML/ANAPC11/VPS28/AP2S1/UB  
/LEF1/GPI/FGFR1/ZC3H12A/SVBP/SLC9A3R1/NCKAP1L/FBXO5/GTPBP4/ADAM8/CCL2/DAPK3/PIK  
9A3R1/MT3/BLOC1S4/DYNLT1/DVL3/FLOT1/EHD1/NCKAP1L/SH3KBP1/PAK4/VLDLR/LYPLA2/CPNE



ROCC/CAPZB/RALA/DGUOK/SEMA4B/CDC42/KAT2A/PRKCI/TGFB3/PRRX1/ZMYND8/SEMA4D/SYT1/C  
F113A/PSMD11/RAE1/ZMIZ2/PSMD1/DCAF16/PSMA7/UBE2E1/WSB2/FBXL6/RPS3/TRAF3/PSMB3/B  
CCT2/CD58/IRF3/LMNA/HSP90AB1/F2RL1/DYNLL1/PLEKHM2/CNPY4/NDUFAF2/CSNK1E/LZTS2/TB  
CCT7/DCTN2/SSB/RPS5/TSPAN10/LAMTOR5/CDK5/TXN/UBE2L3/TULP3/FAM83H/RPS21/TCP1/RPL  
RPE/VMA21/HIP1R/TXNL4A/TPPP3/SNRPF/UQCC3/NOP2/NCKAP1L/FBXO5/SPAG1/EIF3D/TUBB4A/  
DC3/RPL35A/SET/PSMD10/PSMD11/RAE1/EIF4A3/PSMD1/ISG20/GPX1/PSMA7/EXOSC5/YWHAB/RP  
10/KRI1/FAM98B/RPS7/FARSA/RPL7A/WDR55/GAR1/SEN3/GTPBP3/RPS15/ADAT3/RPS16/PUS7/  
ASAHI/KPNB1/SLC11A1/RNASE2/RAC1/CTSS/LAMTOR1/GNS/CD47/FTL/NFAM1/FGR/PSMA5/NRAS/  
/THY1/RHOF/CORO1C/DUOX2/C3AR1/LMNA/F2RL1/RRAS/RELN/BEX4/LIMCH1/ZSWIM5/ZNF703/PP  
/C5AR1/GRB7/PRKD2/SEMA4B/SYDE1/AGO2/CALR/SEMA4D/XCL2/CMKLR1/APP/ADRA2A/SWAP70/S  
ELI1/CLEC7A/RASAL3/GPR183/WNT4/BTN2A2/HSPD1/LFNG/ABL1/SART1/HLA-DOA/FCGR2B/CSK/  
ASAHI/KPNB1/SLC11A1/RNASE2/RAC1/CTSS/LAMTOR1/GNS/CD47/FTL/NFAM1/FGR/PSMA5/NRAS/  
PSM3/PLXND1/F3/NUP85/CALCA/CCR1/TUBB2B/CXCL16/USP14/LOX/C5AR1/PADI2/GRB7/PF4V1/  
/BTG2/MRPS7/LARP4B/NAT10/EEF1A2/MRPL53/MPV17L2/GSPT2/RPS7/FARSA/RPL7A/RPS23/RPS  
HAQ/YWHAB/RPS3/TFAP4/DFFA/BARD1/ARRB2/PTPA/PRKCI/TGFB3/GAL/GZMB/DNM1L/CTSD/HSPE  
NIP2/BCL3/NCKAP1L/AATF/NOC2L/ADAM8/PAK4/LAMP3/EVI2B/NONO/CCL2/SHC1/HDAC2/HTATIP  
HAQ/YWHAB/RPS3/TFAP4/DFFA/BARD1/ARRB2/PTPA/PRKCI/TGFB3/GAL/GZMB/DNM1L/CTSD/HSPE  
/MT3/TNIP2/BCL3/NCKAP1L/AATF/NOC2L/ADAM8/PAK4/LAMP3/EVI2B/NONO/CCL2/SHC1/HDAC2/  
L7/ANAPC5/HECTD3/CDC27/CDC34/HSP90B1/UBE4B/AUP1/MAEA/HSPA13/CAV1/FBXO6/STUB1/AN  
NCKAP1L/PIP4K2A/TUBB4A/CAPZA1/RANGRF/DAPK3/CXCL13/MKKS/KIF14/FHOD3/SNF8/PHLDB1/  
ACK1/RALB/RPA2/CUL4B/DRG1/MAPT/ARPC1A/WNT4/NF2/EMILIN1/BRK1/LIMS1/AKIRIN1/ARPC5  
2/CCL2/RPSA/SHC1/TRIM31/KRT8/HTATIP2/KPNB1/SNF8/PLSCR1/CD209/LYN/HCFC1/SSB/RAB1  
IF3D/LAMP3/ATP6V1H/ULBP2/CCL2/RPSA/SHC1/TRIM31/KRT8/HTATIP2/KPNB1/SNF8/PLSCR1/C  
AC2/MKKS/ARHGDIB/ZFP41/DEFB1/OAZ3/FANCA/CCT7/TESK1/RPL10L/FKBP4/ITGA2/ADGRG2/DA  
LM/FBXO5/DBF4/TUBB4A/CNOT9/CDKN2B/CCL2/CSNK1D/ANAPC7/CDK2/LSM10/KIF14/NASP/DCTN  
SET2/FPR1/STX1A/MNDA/PTGES2/RAP2B/GYG1/ARHGAP9/RHOF/SIRPA/DEGS1/HK3/CCT2/CD58/C  
L1/STAT1/RAB7B/CCL13/LRRC14/NPLOC4/IFI35/S100B/TRAFFD1/POLR3K/PSMB2/LY86/IRF7/PS  
K3/PSMB5/BCL10/PSMA4/PSMD9/PTPN2/CASP8/PTPN1/RPS27A/MAVS/DMBT1/PAK2/TLR2/MUC6/U  
G4/FGFR1/ZC3H12A/DYNLT1/DVL3/FLOT1/EHD1/NCKAP1L/FBXO5/ADAM8/VLDLR/CPNE1/EVI2B/H  
MC4/PML/DYNC1LI1/MLF1/PRCC/PSMD10/PSMD11/CDC123/CDKN2C/PSMD1/DONSON/TIPIN/CDK7/  
P4/DBNDD2/IL1B/GBA/ACTB/CDK5/CHORDC1/PDGFA/TXN/MLKL/ADRA2C/FGR/LCP2/MAPK11/TGFB  
A1/HSPH1/CD209/LYN/CARD11/RAC1/CBFB/IL1B/IL2RA/NCAPH2/CD47/NFAM1/TNFSF13B/PSMB1  
BP1/MYBL1/DNM1L/RAD21/KATNB1/MTBP/WRAP73/NME6/MSX1/NDE1/DRG1/MAPT/WNT4/MZT1/RAD  
CBFB/CDKN1C/PSMB4/PIAS3/IL2RA/NCAPH2/PSMB8/NFAM1/PSMB10/ETV6/PSMA5/TGFB2/CDH17/  
7/TACSTD2/TBX19/PRKD2/PSMB3/VWA1/RALA/PAX8/GRB2/ARRB2/CDC42/KAT2A/MATN3/PSMD4/H  
/MSH2/RPS3/SIT1/CST7/GRB2/CD6/DROSHA/CDC42/KAT2A/IL4R/PNP/GAL/LILRB4/AP3D1/AXL/  
GRB7/PF4V1/GRB2/STK10/CALR/CXCL11/CCR5/XCL2/CMKLR1/APP/SWAP70/CD48/TRPM4/RPS19/  
CK1/CD300LF/MYADM/DNAJB2/WAS/VIL1/ATAD2/GSK3A/DNAJA4/DYNC1LI1/PFN1/INPP5J/MAP4/  
/CORO1C/BIN1/DUOX2/C3AR1/LMNA/F2RL1/RRAS/RELN/BEX4/LIMCH1/ZSWIM5/ZNF703/PPARD/C  
KD2/SEMA4B/SYDE1/AGO2/CALR/SEMA4D/XCL2/CMKLR1/APP/ADRA2A/SWAP70/TRPM4/SEMA4F/RP  
NO/PNKP/DVL3/DUSP2/BLM/NCKAP1L/MLST8/FBXO5/DBF4/FGFR3/GTPBP4/ADAM8/PAK4/VLDLR/C  
M1/ITGA2/CCL4/DNAJB2/F3/LCK/TBC1D13/RASA3/IFI16/CASP1/PML/FGFR2/DVL2/PFN1/ARHGA  
N3/MYADM/WAS/RASSF1/POC1A/VIL1/CHMP3/GSK3A/CIT/PLK4/PFN1/WASF1/INPP5J/NES/RAE1/  
OR1/S100A13/FGR/KXD1/AP3M2/HAUS8/NDRG4/RAB10/PLK4/WASF1/MAP4/ODF2/SYT12/TRAPPC1  
/MAPT/PDCD6/BICDL2/NSF/SEC13/RHOT2/NSFL1C/PDCD10/ACTR3/CEP19/VAMP8/MILR1/WIPI1/  
LRFN1/JAG1/LYN/GPRC5B/FKBP4/MYLIP/IL1B/RAP2A/CDK5/TULP3/NREP/CTTN/SPOCK1/ADRA2C  
PLXNC1/STYXL1/NOTCH1/FIG4/MOB2/LLPH/VEGFA/TLR2/HSPA5/DDX56/GLI1/RAB11A/KIF20B/P  
K1D/YWHAH/KIF14/CAMSAP2/KDM1A/JAG1/LYN/ITGB1BP1/GPRC5B/FKBP4/RAC1/MYLIP/IL1B/RA  
4/NDUFAF2/CSNK1E/LZTS2/P2RX5/GDI1/ZC3H12A/BID/NCBP2/CCT4/BCAP31/UBE2J2/DVL3/GPS  
AS/HYOU1/PRELID1/KRT18/PPARD/LEF1/PDCD1/PA2G4/IRF7/PIM2/HIP1R/ZC3H12A/PSME3/BID  
PLSCR1/CLN3/BBC3/PMAIP1/RAB20/REEP2/ITGA2/AKAP8L/EHD2/ACTB/GLDN/CTTN/FA2H/MYADM

SMA5/DNAJB2/ASB6/PSMD13/NUP85/PSMC4/GSK3A/NUP43/FBXW9/SOCS3/ANAPC11/COPS7B/VPS2/VIL1/CHMP3/LRFN4/WDR45B/CENPK/HAUS8/MAP1LC3B/PLK4/EDC3/VPS28/MAP4/IFT80/AGFG1/B/CPE/PDCD5/AP3D1/RPS19/RPLP0/STX4/RPL18/ICMT/SGTB/RPL23/RACK1/MYO5A/EPB41L3/RO27/NUP85/NUP43/PML/TNIK/DVL2/PARP1/USP14/PSMD10/RAE1/LTBR/GPX1/RPS3/USP1/BAG3/N1D/KRT8/MKKS/KPNB1/FHOD3/CAMSAP2/HCLS1/PSTPIP1/TESK1/ITGB1BP1/ARPC5L/FKBP4/B4GA3/KRT18/PPP1CA/LEF1/PDCD1/PIP5K1C/ZC3H12A/BLOC1S4/LAG3/SIRPG/TSTA3/FLOT1/ACTG1/1/BRK1/IQCB1/AKIRIN1/TMEM216/ABL1/VCL/PALM/ACTR3/ARAP1/CEP19/TBC1D7/CEP41/TTYH1.RALA/DGUOK/SEMA4B/CDC42/PRKCI/TGFB3/PRRX1/ZMYND8/SEMA4D/SYT1/CDC42EP2/DNM1L/SYTKN2C/PSMD1/DONSON/ODF2/PSMA7/UBE2E1/CCND2/TFAP4/PSMB3/ZNF207/TOPBP1/APP/PSMD4/C.HOC/ESPL1/POLA2/BAX/BCAT1/LCMT1/NAA10/PCBP4/CASP2/BRSK1/GMNN/MIIP/PRKDC/STIL/SS1/TMEM64/WDR5/NKAP/PSMC3/RHOA/INHA/AP3B1/RUNX3/ZMIZ1/PSMC5/KITLG/CCL19/EIF6/NOTRB4/PDCD5/STX4/RACK1/RALB/CEP250/CCT8/GNL3/CLIP3/MAPT/NF2/KCNAB2/CEMIP/PK1A/EMDA/F2RL1/RRAS/RELN/BEX4/LIMCH1/ZNF703/PPARD/CORO1B/LEF1/GPI/FGFR1/ZC3H12A/SVBP/S.GO2/CALR/SEMA4D/XCL2/CMKLR1/APP/ADRA2A/SWAP70/SEMA4F/FADD/STX4/SEMA5B/CLEC7A/RA.DHX38/DBR1/GEMIN2/PABPN1/SRSF1/SRSF2/SRPK2/HNRNPUL1/CASC3/SNRNP70/COIL/FIP1L1/R.GEMIN2/PABPN1/SRSF1/SRSF2/SRPK2/HNRNPUL1/CASC3/SNRNP70/COIL/FIP1L1/RBM4B/DHX8/R.GEMIN2/PABPN1/SRSF1/SRSF2/SRPK2/HNRNPUL1/CASC3/SNRNP70/COIL/FIP1L1/RBM4B/DHX8/R.C5/TIGAR/RBPJ/ADM/BECN1/PSEN2/VASN/HSP90B1/SUV39H1/PDK3/EDNRA/CAV1/ATP7A.CPNE1/C1orf35/CAP1/PIK3CD/ASAHI/KPNB1/SLC11A1/RNASE2/LYN/RAC1/CTSS/LAMTOR1/GNS/L4R/PNP/GAL/LILRB4/AP3D1/AXL/FADD/BTK/PELI1/STX4/CLEC7A/RASAL3/GPR183/LBP/EXOSC.MC4/MUC5B/CD79A/UBE2D1/PSMD10/PSMD11/PSMD1/C5AR1/PSMA7/RPS3/PRKD2/TRAFF3/PSMB3/G.IE/POLR2I/POLR2J/RPUSD3/HNRNPL/SF3B3/SUGP2/HNRNP70/POLR2D/SART3/DHX15/TGS1/GPKOW.SC3/FIP1L1/RBM8A/MAGOH/BNRNP3/SMG7/TNPO3/EFCAB7/POLDIP3/THOC7/RBM22/DDX20/KPNA

FGD6/RALA/GRB2/SYDE1/CDC42/ARHGAP18/CDC42SE2/ADRA2A/CDC42EP2/MYO9B/OCRL/SPRY4/C.ZNF598/PLEKHN1/EIF2B5/RPL38/HNRNPM/KHDRBS1/EXOSC3/PIWIL4/BTG2/SEC13/PSMD8/LARP4.DK2AP2/BNB/PLK3/RNF2/ZFYVE19.PA5/DDX56/RAB11A/RAB29/IFRD1/PACIN1/PPP2R5B/CDK5R1/METR/APPB1/SRF/CAPRIN1/RHO

/SWAP70/SEMA4F/FADD/STX4/SEMA5B/CLEC7A/RACK1/SEMA3C/SEMA3E/IGF1R/LBP/PDCD6/CCL3.3/VPS4A/MRPS5/VPS16/DHX8/ADD1/MRPL36/TFIP11/MRPL14/OGFOD1/MRPL3/CAPZA2/ERAL1/PY./CDC23/HNRNPD/PHF1/DCP2/BUB3/HNRNPC/ING2/BCOR/SETDB1/MYC/PRMT6/BRD7/BRD4/ASF1A/.ER4/HSP90AA1/PRKAA2/CHD1L/MPP7/LMO4/SPIRE1/STYXL1/DCTN1/VPS35/SH3GLB1/THRA/VDAC.PNE1/C1orf35/CAP1/PIK3CD/ASAHI/KPNB1/SLC11A1/RNASE2/LYN/RAC1/CTSS/LAMTOR1/GNS/C.AC1/CTSS/LAMTOR1/GNS/CD47/FTL/NFAM1/FGR/PSMA5/NRAS/SERPINB6/PTPN6/PSMD13/AGPAT2.4A/CNOT9/CDKN2B/CCL2/CSNK1D/ANAPC7/CDK2/LSM10/KIF14/NASP/DCTN2/PRIM1/CDKN1C/PSM.CRLF3/KIF20B/MECP2/CENPJ/PPP2R5B/CDK5R1/RHOA/FAP/LGMN/CNOT10/STXBP4/BTC/BECN1/A.SF1/SRSF2/CASC3/FIP1L1/RBM8A/MAGOH/BNRNP3/SMG7/TNPO3/EFCAB7/POLDIP3/THOC7/RBM2.A/CCNO/DYNLT1/LBH/GPSM2/HAUS1/BLM/FBXO5/AATF/EVI2B/ITGB3BP/RTKN/ANAPC7/CDK2/KIF.ABL1/SFRP2/TNFAIP3/CALM2/PDCD10/CSK/MAPKAPK3/CCND3/DBNL/ERP29/THBS1/ADAM17/PTPN.12/YWHAQ/YWHAB/RPS3/TFAP4/DNAJC10/FAIM/BAG3/ARRB2/PCGF2/GZMB/DNM1L/MAPK7/PPP1R1.MTPN/NIN/SPTAN1/CORO2B/ARF1/RHOB2/GMFB/HAX1/CAMSAP1/PREX1/ARFGEF1/CIB1/ADD1/A.SRSF1/SRSF2/SRPK2/PAF1/SNRNP70/RBM4B/RBM8A/METTL3/HNRNPA0/PSMB1/MOV10/CEL2F/PSM.32B/AP2B1

3/NME6/MSX1/NDE1/DRG1/WNT4/MZT1/RAD51C/HSPA2/RAD51D/NSFL1C/EME2/ACTR3/CHEK2/RAD/ACTR3/PSMB5/BCL10/PSMA4/SPPL3/HSP90AA1/PSMD9/PTK2/PTPN2/PAK2/MUC6/RAB29/MUC15/.RPS4X/RPL6/EXOSC9/EXOSC10/MAGOH/RPL37/RPL27A/DXO/EXOSC7/TBRG4/RPL36/UBA52/ZPR1/.S1/ETF1/RPL19/PSMC3/RPS11/EXOSC1/EIF3E/RPL13A/HNRNP70/POLR2D/ANP32A/RPL37A/RPLP1.D3/LIMA1/CD2AP/PACIN1/ARHGAP28/PPM1F/FAM171A1/SRF/DSTN/PLEKHH2/RHOA.T1/RBM14/PLEKHH2/MLLT6/DNMT3B/MTPN/SPTAN1/TIGAR/BECN1/CORO2B/CTBP1/GMFB/ATG7/CA

GALNT2/VCAM1/TWSG1/PTK2/PTPN2  
CCL19/IST1/ARF1/SNX3/HTT/ATP7A/DAB2IP/DZIP1/PROM2/ADNP/CNR1/PLXNB2/RAB8B/NCKAP1  
K5R1/ARHGAP28/SRF/DSTN/PLEKHH2/RHOA/MTPN/SPTAN1/IST1/ARF1/RHOBTB2/GMFB/HAX1/ATP  
DR75/CTU1/TSEN34/FAM207A/BMS1/TPRKB/NOL10/RSL1D1/TYW3/DIMT1/EBNA1BP2/TSEN15/NOL  
CD38/ACTN4/DNMT3B/PSMC5/TIGAR/RBPJ/ADM/BECN1/PSEN2/VASN/HSP90B1/SUV39H1/PDK3/ED  
/IFITM3/FAM3A/KPNA6/NELFA/POLR2E/SNX3/CCL8/CAV2/CAV1/SUPT4H1/HMGA2/PARP10/MORC2  
1/TP53BP1/ATAD5/INPP5D/PTPRC/NECTIN2/CRLF2  
FC5/RNF8/DHX9/MAPKAPK5/DNAJC2/TIGAR/FAF1/UBE2N/EREG/MMS19/SMARCAL1/TFDP1/MSH6/A  
T1/HLA-DOA/FCGR2B/TNFAIP3/TOX/CSK/BAD/BCL10/VCAM1/TWSG1/PTPN2/IL20RB/PAK2/HLA-F  
RNP/Map1A/ERCC1/LARGE2/VEGFA/EXOSC10/CCNE2/IL20RB/TMEM64/MUC6/DEF8/NANOS1/HNRN  
2/UBA52/MECP2/CACNB3/PSMC3/TWIST1/SRF/RHOA/CD38/ACTN4/DNMT3B/PSMC5/TIGAR/RBPJ/A  
S11/ZDHHC9/RPL13A/YWHAG/RPL37A/RPLP1/RPL32/RPL30/TFDP1/RPS9/RPS14/CALM3/GET4/RP  
PSMA7/UBE2E1/CCND2/TFAP4/PSMB3/ZNF207/TOPBP1/APP/PSMD4/CETN2/PSMD3/RBX1/PSMD7/R  
1/PTPN2/THBS1/CSNK2A1/STYXL1/CASP8/PTPN1/PIAS4/VDAC2/GNAI3/PTPMT1/PAK2/TMBIM1/T  
PP5D/PTPRC/NECTIN2/CRLF2

11A/KIF22/ARL8B/NCAPD3/TEX11/NEK6/STAG3L4/BECN1/ANAPC5/PMF1/MMS19/CDC27/SEH1L/M  
3/ZFYVE19

/RPS9/WDR46/IMP4/RBFA/RPS14/RPS27/EXOSC2/DDX52/DHX30/AAMP/TEX10/PWP1/MRPL36/NIP

1/DDX19A/TPR/SRSF7/MCM3AP/NUP50  
/RIOK1/RPL11/RPS24/WDR12/PDCD11/USP36/RPL14/DDX51/RPL10A/ZNHIT3/SPIN1/RRP15/WDR  
F1L4/SRSF3/BBS12/NUP214/TSC1/IFT140/IWS1/GRIPAP1/HIP1/DAG1/NACC2/ARHGAP44/DDX19  
PR132/NEDD1/MECP2/CENPJ/PSMC3  
/NOX1/PARK7/ING2/SHISA5

/ARF1/PDIA3/ACTR1A/KLC1/YTHDF1/CD1A/PSMB1/RAB8B/KIF3A/PSMB6/CAPZA2/PSMA3/HLA-C/  
0/AGO1/ZNHIT3/GEMIN6/SMN2/CNOT2/RPL12/MRPS2/RPS28/LUC7L3/GEMIN5/EIF3C/DDX1/LSM3

2/CD19/PRKCB/PIK3R2/VAV3/SLA2/WNK1/BTN3A2/EIF2B3/IKBKB

PC4/PAF1/ZNF16

L12/RPS18/RPS28/RPS17/NUP214/RPL22/TARDBP/RPS15A/TAF11

0/ERAL1/GEMIN8/EIF3F/MRPL20/AGO1/KIF5B/DYRK3/ZNHIT3/GEMIN6/SMN2/CNOT2/RPL12/MRP

PT1/NUP214/TSC1/BICD2/IWS1/ZNHIT6/ATXN2/RFTN1/PARN/DDX19A/TPR/SRSF7/MCM3AP/NUP5

TNKS1BP1/GSPT1/SKIV2L/DCP1A/CSDE1  
NHIT6/TSR1/RPP38/MRPS11

PS15A

A/CLEC4A

F11











RHGEF3/DNM2/ARHGEF25/NOTCH1/ARHGEF11/RAB3A/RAB11A/PLEKHG6/DENND4B/RAB29/RHOA/RAE2N/MECOM/CTBP1/SUV39H1/MORF4L1/EP400/LDB1/PCGF3/SRCAP/HMGA2/HDAC5/PAGR1/ENY2/T.P1/TBC1D7/SGSM3/ARHGAP11A/PLXNC1/SRGAP2/PTK2/TNK2/RGP1/TBC1D22B/ARHGEF11/SMAP1/ /WNT7B/ITGB1BP1/BIRC7/GPRC5B/CDKN1C/DUSP4/DBNDD2/IL1B/GBA/ACTB/CDK5/CHORDC1/PDGC/GSK3A/NDRG4/NAP1L2/TNIK/TUBB2B/DVL2/INPP5J/NSMF/LRP8/SRRT/FAIM/DGUOK/SEMA4B/C./METRN/APBB1/SRF/CAPRIN1/RHOA/RAPGEF1/DNMT3B/GPC2/NIN/DPYSL3/AP2A1/IST1/ZC4H2/A THEMIS2/IRF1/IRF3/C3AR1/HSP90AB1/F2RL1/ARPC2/STAT1/RAB7B/LRRC14/CTLA4/ARPC3/WIP STK10/MTCP1/TGFB3/MUC20/ADRA2A/DCUN1D5/XRCC6/HMGN1/TELO2/MAP3K6/IKBK/ DSTYK/STK 1/ST8SIA4/GCNT1/B3GNT8

2/GALNT3

M14/MAP3K1/LGMN/DHX9/PSMC5/UBE2N/EREG/TLR7/HSP90B1/IRAK2/CAV1/DAB2IP/NECTIN2/CL B2IP/HMGA2/GTF2F1/HDAC5/CALM3/DZIP1/PKD1/EDF1/STUB1/BMP2/HDAC8/ADNP/ADD1/PPARG/

SMB6/FFAR2/CNPY3/MFHAS1/ICAM2/PSMA3/IRF4/CTSL/CTSB/RELA/AIM2/PSMB7/SKP1/NOD1/TR L10RB/SLFN11/APOBEC3F/HYAL2/IFNG/CD207/RELA/AIM2/FAM111A/POLR3A/TRIM15/ZMPSTE24



SMA1/SFRP2/TNFAIP3/NFATC4/PLCB2/PSMB5/PSMA4/PRKAA2/PSMD9/CSNK2A1/VPS35/NOTCH1/R  
FL1C/UBQLN4/RPS7/KCTD5/FOXF2/RNF216/PSMB5/PSMA4/SGTA/PSMD9/PTK2/UBL7/CSNK2A1/RP  
USP22/KCTD2/VPS25/PSMD4/PSMD3/RBX1/UQCC2/PSMD7/TMUB2/TBL1XR1/PELI1/CBL/SGTB/GZM  
IP3L/RAB3A/RCC1L/SREBF1/NDUFB3/BCL2L1/RAB29/TIMM10/AIP/CDC37/TIMMDC1/NDUFA13/ST  
1/PREX1/ARFGEF1/ARHGAP17/ADD1/ASAP3/MYO1C/SPIRE2/NCKAP1/PPP1R9A/LPAR1/PXN/CCDC8  
CSK/BAD/EMID1/BCL10/VCAM1/DNM2

SMB7/SKP1/NOD1/TRIM15/BPIFB1/PTPRS/CLEC4A/APPL2/RPS6KA3/TLR1/S100A1/NOD2

PS18A/TWF1/MRPL43/VILL/MRPS9/MRPL50/EPS8/GLE1/MTRF1L/MRPS35/MRPS33/MID1/MRPS10/

6KB2/RPLP0/RPL18/RPL23/RACK1/GADD45GIP1/VIM/MRPL10/TRIM71/TNIP1/DPH7/ZNF598/PLE  
42/ATXN7L3/PSMD4/CBX8/DCUN1D5/KLHL17/PCGF2/DNM1L/PSMD3/RBX1/PSMD7/PELI1/MTBP/CB  
QLN4/RPS7/KCTD5/FOXF2/RNF216/PSMB5/PSMA4/SGTA/PSMD9/PTK2/UBL7/CSNK2A1/RPL5/RPS2  
L23/RNF4/UBE2L6/RACK1/RNF7/CUL4B/TRIM71/TRIM25/RNF122/LONP1/PRPF19/UBXN1/PSMD8/  
D/VCP/PSMA1/SFRP2/TNFAIP3/NFATC4/PLCB2/PSMB5/PSMA4/PRKAA2/PSMD9/CSNK2A1/VPS35/N  
B2/UXS1/B4GALT7/MUC3A/LDHA/DLAT/NAGK/KRTCAP2/RPN2/IL1B/PFKM/FA2H/B4GALT2/GNPDA2  
NFRSF11A/RELN/S100B/P2RX5/C1QTNF1/PPARD/NELFE/FGFR1/PIM2/TGM2/ZC3H12A/SLC9A3R1/  
GNT2/SLC35C2/FUT11/XXYLT1/HBEGF/MANBA/PMM2/SDF2L1/HEXA/CCL19/DOLK/ATP7A/EOGT/B3  
GAK/TJAP1/FNBP1L/COG4/COG2/IST1/BHLHA15/SNX3/HTT/CAV2/LMAN2/PI4K2A/CAV1/ARL1/GE  
RAB1A/SRPK2/IFITM2/DDB1/P4HB/RAB1B/MX1/NCAM1/TRIM32/VAPA/TBC1D20/ADAR/MVB12B/TR  
PS6/NFKBID/CHD7/CLPTM1/SH3RF1/IRF4/RHOH/CD4/IFNG/ANXA1/CCR2/FZD9/DOCK11/CD19/PO  
POLR3C/CCL3/CDK19/HSPD1/PSMD8/PSMA1/TNFAIP3/TRADD/VAMP8/MAPKAPK3/PSMB5/BCL10/PS  
A/ARMC9/CCDC88A/NEURL1/C2CD3/CNTRL/TCHP/DYNC2LI1/CEP97/RAB3IP/NPHP1/ARL3/CELSR3

PDPN/MTPN/SPTAN1/CORO2B/NOTCH2/ARF1/RHOBTB2/GMFB/HAX1/CAV1/PREX1/ARFGEF1/ARHGAP  
TR1/KIF3A/ARMC9/CCDC88A/NEURL1/C2CD3/CNTRL/TCHP/DYNC2LI1/CEP97/RAB3IP/NPHP1/ARL

CAM1/WNT5A/CD40

TD5/FOXF2/RNF216/PSMB5/PSMA4/SGTA/PSMD9/PTK2/UBL7/CSNK2A1/RPL5/RPS27A/FBXW5/USP.  
2/MYCBP/SNU13/GOLGA3/MCM8/VCX/IL4R/CALR/CTDNEP1/TDRKH/HSF2/APP/MYBL1/CETN2/TMEM  
1/VDR/SBF1/ODF2/MSH2/MYCBP/GOLGA3/UBE2A/ARRB2/MCM8/VCX/IL4R/CALR/TGFB3/CTDNEP1/  
F2/MSH2/MYCBP/GOLGA3/UBE2A/ARRB2/MCM8/VCX/IL4R/CALR/TGFB3/CTDNEP1/TDRKH/HSF2/AP  
/ADORA2B/SNAPIN/ARF1/UBAC2/SNX3/HAX1/IL13RA2/CD84/CALM3/CIB1/CSNK2A2/PARL/HUWE1.

P8/CFTR/PLK3/SH3GLB1/MAVS/PFKFB2/PLA2G1B/TLR2/CD2AP/EDEM2/ZPR1/RAB29/KIF20B/GOL





A/MT3/DVL3/FLOT1/KISS1/NCKAP1L/MLST8/DBF4/FGFR3/ADAM8/PAK4/VLDLR/CNOT9/CCL2/SHC  
GSM1/CCL19/XCL1/RANBP3/CCL3L3/DOCK10/CCL8/CAV2/DAB2IP/PREX1/ARHGAP22/ARHGAP27/A  
A2B1/POLR1C/KMT2B/LRIF1/MBD1/SMAD2/ELAVL1/WBP2/ZMPSTE24/NUP214/SMAD3/MYCN/TFAP2



P2/MAPK11/F3/LCK/VIL1/GSK3A/AP2M1/NDRG4/SOCS3/MYOF/FGFR2/WASF1/AP2S1/MST1R/ATP6  
H1B2/ACVR1/HSPA2/ADAM28/SRPK1/BAD/DNM2/SPIRE1/SPA17/NOTCH1/CFTR/GJB3/PAQR7/RNF2.  
TPA/CABIN1/MTF2/SEMA4D/VPS25/SWAP70/SPRY4/PPP1R15A/PPP5C/GMFG/CBL/RPL23/AKT1S1/  
/SNX3/TLE6/BARX1/KLHL12/EGF/CAV1/DAB2IP/DKKL1/CBY1/ZBED2  
LN2/ULK1/LIX1L/PIK3C2B/HTRA2/WDR45/ATP6V0A1/TBC1D25/SESN2/NOD1/ATG3/RAB7A/CHMP6.

/DBF4/FGFR3/ADAM8/PAK4/VLDLR/CNOT9/CCL2/SHC1/HDAC2/CSNK1D/KIF14/HCLS1/AXIN1/SLC  
FSF15/PTK2/THBS1/ADAM17/PTPN1/RPS27A/VEGFA/PLA2G1B/PAK2/TRAF4/UBA52/DUSP7/MAP3K

D5/NLRP3/ACTR8/NFRKB/PSMD12/SMURF2/OGT/TAB1/USP46/USP13/PSME2/BRCC3/OTUD6B/COPS

L1/STMN2/RASAL1/BAD/DBNL/PLXNC1/DNM2/STYXL1/NOTCH1/FIG4/MOB2/OLFM4/LLPH/VEGFA/T  
/DNM1L/MAPK7/SYT3/SEMA4F/SEMA5B/STK25/ABI2/ARHGDIA/SCN1B/CSPG5/SEMA3C/EPB41L3/S  
/PMP22/PTPRF/SEMA3E/MAPT/TGIF2/CHN1/PRPF19/CBFA2T2/ABL1/STK24/STMN2/RASAL1/SFRP  
7/SYT3/SEMA4F/SEMA5B/STK25/ABI2/ARHGDIA/SCN1B/CSPG5/SEMA3C/EPB41L3/SEMA3E/MAPT/  
MPDL3B/ADAM8/HLA-DQA2/MY01G/NONO/ULBP2/PIK3CD/NLRC5/PLSCR1/SLC11A1/CD209/LYN/HL  
L3/MOV10/EIF2B4/UCN/OGFOD1/UNK/LRPPRC/POLDIP3/ENC1/RPL10/KLHL25/HNRNPD/LSM14B/N  
P/SFRP2/TRADD/BAD/BCL10/RCN3/TNFSF15/THBS1/CSNK2A1/CASP8/PDCD2  
3/TLR2/ANXA3/IFNAR2/TARBP2/IFI6/IL17RA/TNFRSF14/DHX9/IFITM3/RPL30/RBPJ/BECN1/EP  
F/MTPN/CCAR2/CYP27B1/IST1/EIF4G2/CDK11A/OGFR/RPTOR/CIB1/IL17RB/EXOSC2/CTDP1/IP6  
/USP46/USP13/PSME2/BRCC3/OTUD6B/SUDS3/YOD1/USP28/PSMD6/GATA3/USP4/TGFBR1/PSMC2/

3/WIPF1/CSNK1E/SORT1/RIN1/HYOU1/SLC2A5/PIP5K1C/TGM2/HIP1R/ARFGAP1/SNX10/STAB1/S  
RASAL1/NFATC4/PALM/ARAP1/KEL/DBNL/PLXNC1/DNM2/PTK2/ZMYM3/OLFM4/VEGFA/BCL9L/HEXB  
K24/CALM2/PDCD10/CSK/CLSPN/MAPKAPK3/CCND3/BAD/DBNL/BCL10/ERP29/HSP90AA1/TNFSF15.

PSTPIP1/SLC11A1/HSPH1/CD209/RAB20/LYN/APOBR/MCTP1/RAC1/ITGA2/ANXA11/IL1B/EHD2/A  
L/SPATA2/RNF114/DZIP1/CIB1/SIX5/CSNK2A2/ACTR1A/NECTIN2/BAG6/RFX2/SLCO4C1/CNR1/Z  
/EIF4G2/EIF4G3/CNOT3/PDK3/RPS9/KHSRP/DNAJC1/RPS14/MKNK1/PGAM1/LARP1/YTHDF2/CDK5  
CUL7/UGGT1/UGGT2/TP53/TARDBP/SVIP/PDX1/DERL3  
/SOCS5/CD274/PCBP2

B6/ARPC2/TGFA/FMOD/PSENEN/ARPC3/NUP93/FSTL3/SORT1/SUB1/EPHB3/ZNF703/DDIT4/SH2B2  
EMA4F/SEMA5B/STK25/ABI2/ARHGDIA/SCN1B/SEMA3C/EPB41L3/SEMA3E/MAPT/RERE/CHN1/ZNF3

B1/SIX5/CSNK2A2/ACTR1A/NECTIN2/BAG6/RFX2/SLC04C1/CNR1/ZSCAN2/METTL3  
SNK2A1/CASP8/PDCD2

2B/FGFR2/COCH/COL6A2/NSMF/SIPA1L3/GRB7/LRP8/PARVG/TACSTD2/EMB/VWA1/BTBD3/SEMA4B  
SUMO2/SUPT7L/MAP3K7/PHF1/DPY30/NAA60/AAAS/PARK7/IRF4/EGR2/BCOR/SETDB1/PRMT6/BRD



BCL3/CD68/CCL2/SHC1/HDAC2/CXCL9/CXCL3/KRT8/CXCL13/NLRC5/PLSCR1/DEFB1/SLC11A1/PM  
SEMA3C/EPB41L3/SEMA3E/MAPT/RERE/CHN1/ZNF335/EXT1/ABL1/STK24/VCL/RASAL1/NFATC4/K  
BCL3/CD68/CCL2/SHC1/HDAC2/CXCL9/CXCL3/KRT8/CXCL13/NLRC5/PLSCR1/DEFB1/SLC11A1/PM  
PD1/IPO13/PKIA/IL10RA/TIMM13/WRAP53/TNFAIP3/MFF/RPS7/RPL7A/RPS23/RPS10/BAD/ACOT

K2A1/VPS35/PLK3/SH3GLB1/TOMM22/OPTN/GNAI3/BNIP3L/LZTS1/SREBF1/CSNK2B/TRIM21/CDC  
3H12A/STAB1/TNIP2/BCL3/CD68/CCL2/SHC1/HDAC2/CXCL9/CXCL3/KRT8/CXCL13/NLRC5/PLSCR  
PPP1R15A/UQCC2/RPS19/RPS6KB2/ST3GAL5/RPLP0/RPL18/RPL23/RACK1/GADD45GIP1/VIM/MRP  
K2A1/VPS35/PLK3/SH3GLB1/TOMM22/OPTN/GNAI3/BNIP3L/LZTS1/SREBF1/CSNK2B/TRIM21/CDC

CL10/ADAM17/NBN/TMEM98/ERCC1/IL20RB/HLA-F/CD79B/RNF8/TAP2/TNFRSF14/CCL19/XCL1/C

5R1/METR/PA3/APBB1/SRF/RHOA/STXBP1/ROB03/NIN/NRTN/SPTAN1/EPHA2/ARTN/IST1/NEO  
IRR/DHX9/MTPN/FAF1/CRTC2/UBE2N/XCL1/ARID5B/IRAK2/CAV1/TP53BP1/DAB2IP/PARP10/CRT

/FGR/MAPK11/TGFB2/CASP1/GSK3A/MIDN/PML/VPS28/OXCT1/PTPN23/IL1R2/YWHAQ/XPO5/YWHA  
/HTRA2/IFNG/TLK2/MAPK15/ATP6V0A1/EIF4G1/TBC1D25/SESN2/NOD1/PIK3R2/KDM4A/ZMPSTE2

/ITGB1BP1/BIRC7/UNC5CL/DUSP4/PSMB4/IL1B/GBA/RAP2A/IL2RA/PDGFA/LAMTOR1/MLKL/PSMB  
/FGR/LCP2/PSMA5/CD300LF/NRAS/WAS/SFPQ/PQBP1/LCK/PTPN6/PSMD13/IFI16/PSMC4/MUC5B/  
T/ARPC1A/BRK1/CDHR2/RARG/ARPC5/ABL1/KCNN4/ACTR3/KEL/DBNL/DNM2/SPIRE1/NPPB/VEGFA  
PSMD7/SH3GL1/CPE/AXL/TBL1XR1/RACK1/CSNK1G2/WNT4/MED12/JRK/PSMD8/RARG/ABL1/EMD/V

F11/VEGFA/EXOSC9/CDK11B/EGLN2/RAB11A/NANOS1/CRLF3/IFRD1/CDK5R1/NDUFA13/APBB1/SR

R14/PIN1/RPRD1A/PPP1R8/MFHAS1/PTPN13/DUSP13/UBLCP1/EYA3/PPP2R3B/RCAN2/PPP1R12A/

6/DVL1

/ITGB1BP1/BIRC7/UNC5CL/DUSP4/PSMB4/IL1B/GBA/RAP2A/IL2RA/PDGFA/LAMTOR1/MLKL/PSMB





X2/RPP38/APEX1/PARN/SETMAR/POLD2/PNRC2

ARK7/PDE6G

2/SLC9A6/EPHA10/YTHDF1/ADNP/FEZ2/RYK/PIK3CB/PLXNB2/KIF3A/FSTL4/PLCG1/CNP/NCAM1/.

VAV3/CHMP6/SEC23B/SYP/UNC13A/TSG101/TBPL1/CHMP4A/ARFGAP3/VTA1/STX16/ALS2CL/TRAP.



/FBXL18/CDC16/MIB2/UBE2R2/RNF41/PSMD12/BFAR/SMURF2/RNF40/CDC26/TRIP12/TRIM44/ANK12/STRADA/RASGRP1/MARVELD3/TAOK1/MEN1/WNT5A/FGD2/ROR2/MAPK9/SLAMF1/TAOK2/TAB1/

T3B/TIGAR/CCAR2/POLE3/UBE4B/MSH6/NPHP4/ATR/TP53BP1/HMGA2/DCLRE1C/ERCC3/PTPRC/HR23B/DAPK3/CSNK1D/SNF8/AXIN1/OAZ3/SLC11A1/CCDC22/VDAC1/MYLIP/ATP6V1E1/PSMB4/IL1B/GB

P1/TRMT10C/EZH1/OGT/PRMT7/METTL16/SETD4/GSPT1/MRM1/KMT2A/JARID2/TDRD5/RBM15/PCID

NS1/CDK5/LAMTOR1/CTTN/PSMB8/PSMB10/PSMA5/DNAJB2/TAF9/PSMD13/NUP85/IFI16/PSMC4/G

RPF19/ZNF335/BRK1/MFNG/COL11A1/CHTOP/OVOL2/ACVR1/LUZP1/LFNG/RARG/TANC2/EXT1/ABL  
7/CYTH3/RALBP1/ARHGAP33/RALGAPB/GNA13/ARHGEF18/LPAR1/BCR/MADD/RHOH/F2RL2/TIAM2/.

F/SEMA5B/NME6/RACK1/MSX1/CSPG5/RBBP7/SEMA3C/EPB41L3/SEMA3E/MAPT/EPPK1/RERG/MCTS  
3/CALM2/CSK/TBC1D7/WWC1/LEMD2/PRKAA2/PTPN2/THBS1/CASP8/PTPN1/BMT2/VDAC2/OPTN/TX

1/APBB1/GLMN/VPS11/CD38/ATG13/IL17RA/ANP32B/TNFRSF14/DHX9  
MP2/PTK2/THBS1/NOTCH1/CAPN2/ADAMTS5



DCD6/MED12/PRPF19/ZNF335/BRK1/MFNG/COL11A1/CHTOP/OVOL2/ACVR1/LUZP1/LFNG/RARG/TA

RAC1/PDGFA/RTN3/NRAS/B4GALT2/XYL2/PI4KB/COPZ1/FUT3/RAB10/SMPD4/LST1/A4GALT/CHS  
A1/TBX19/DFFA/UBE2A/SMARCC1/BRD9/KAT2A/BEND3/CBX5/CHMP1A/TOPBP1/PRIM2/NCOR2/CBX  
/PRSS16/CD68/ADAM8/VLDLR/CAPN1/HLA-DQA2/LAMP3/CPNE1/ATP6V1H/CAP1/KCNQ1/PIK3CD/A  
EMD2/HAT1/CSNK2A1/USF1/MBD3/CAPN2/RNF2/ANP32E/EXOSC10/CSNK2B/COPS5/MIS18A/MECP2  
8/PHC2/BRCA1/RBL1/NSMCE2/PCNA/MLLT3/MCRS1/XRCC2/CHAF1A/CD3EAP/SGO1/SMARCA4/TOP1  
TF/NOC2L/GTPBP4/NHP2/POP7/RPS19BP1/NONO/IDH3G/PLSCR1/DTT1/NLE1/SRSF9/EMG1/NOP58  
/PRSS16/CD68/ADAM8/VLDLR/CAPN1/HLA-DQA2/LAMP3/CPNE1/ATP6V1H/CAP1/KCNQ1/PIK3CD/A  
GNAI3/GLIPR1/MYO6/TMBIM1/SLC17A5/SLC15A4/UBA52/HLA-F/AP2A2/BORCS6/TECPR1/ARL8B/  
BD2/PA2G4/GPR137B/VMA21/RAB24/ACLY/FLOT1/PRSS16/CD68/ADAM8/VLDLR/CAPN1/PIP4K2A/  
/CEP250/CCT8/HAUS6/DPF2/ATP6VOD1/NDE1/TFAP2A/POLR3H/CKAP2/TTC26/CKAP5/HSPB11/MZ  
1BP1/BIRC7/RAB11FIP4/DCTN5/B9D2/TCP1/KIFC3/POC5/KIF15/RASSF1/POC1A/LCK/SPECC1/C  
SLC25A5/EMD/KLHL42/NSFL1C/KDF1/CALM2/CEP19/BOD1/CSPP1/TCTEX1D2/CCSAP/DCTN1/HAUS  
17/PPP1CC/RAB10/PFN1/WASF1/OXTR/ATP6VOC/YWHAQ/GRB7/PARVG/YWHAB/RPS3/RPL27/RALA/  
3GL1/AP3D1/WDR91/ATP6VOD1/MMGT1/CLIP3/SLC48A1/GGA1/HLA-DOA/STX7/SNX20/RUFY1/VAM  
21/HIP1R/PAM/RAB24/STAB1/SRI/CD68/NCKAP1L/SH3KBP1/ADAM8/HLA-DQA2/LAMP3/CPNE1/KC  
/TOPBP1/MYO9B/KLHL17/CCDC102A/ACTL8/AFAP1/SH3GL1/GMFG/MYO5A/WDR1/ARPC1A/NF2/ARP  
MAPK7/UQCC2/BABAM1/RNF4/RFWF3/ITPKC/TIMM50/CXXC1/OGG1/RPA2/AAGAB/HAUS6/GNL3/TRI  
PB1/SSPN/DPYSL3/PSEN2/SNAPIN/TMEM184A/AP2A1/STEAP2/COPA/RAB9A/KLHL12/YIPF1/CAV2  
RAP2B/GYG1/ARHGAP9/RHOF/BMF/SIRPA/RAB3B/DEGS1/HK3/CCT2/CD58/C3AR1/HSP90AB1/PRSS  
58/NCKAP1L/SH3KBP1/ADAM8/HLA-DQA2/LAMP3/CPNE1/KCNQ1/FZD2/SV2A/MSR1/SYNGR3/KDEL  
PC2/DYNLL1/STAT1/SPDL1/XRCC3/KNTC1/HDAC1/PARPBP/ARPC3/ERCC6L/RFC2/DDX11/E2F4/NC  
B4GALT3/B3GALNT1/RAB35/PITPNM1/ST3GAL4/ARF3/PAM/ARFGAP1/BCAP31/CHST10/CYTH2/SLC  
EM9/GNS/FTL/NFAM1/GNB1/KXD1/AP2M1/ABCA2/DRAM2/SLC29A3/GALNS/DSN1/MAP1LC3B/SLC44  
MP1A/VPS25/APP/SLC9A7/OCRL/CTSD/AP1G2/SH3GL1/AP3D1/WDR91/CCZ1/ATP6VOD1/MMGT1/CL  
END3/CBX5/PRIM2/NCOR2/CBX8/PCGF2/XRCC6/TELO2/NABP1/RBBP7/RAD9A/RPA2/DPF2/POLD3/  
KBP4/RAB11FIP4/PDE9A/ITGA2/EHD2/GNB2/S100A13/ANKRD13B/TNFSF13B/PI4KB/TRMT112/OS  
7/MCAM/CDH17/PPP1CC/RAB10/EVPL/PFN1/WASF1/OXTR/UBA1/ATP6VOC/YWHAQ/GRB7/PARVG/YW  
A-DQA2/LYPLA2/CSNK1D/SLC35B2/KDELRL1/CLN3/SLC35A2/UXS1/HLA-DRB5/B4GALT7/RAC1/GBA  
GNAI3/GLIPR1/MYO6/TMBIM1/SLC17A5/SLC15A4/UBA52/HLA-F/AP2A2/BORCS6/TECPR1/ARL8B/  
BIN1/PALLD/DYNLRB1/CCT2/LMNA/ADAMTSL5/DYNLL1/DYNC1H1/CAPN6/KNTC1/GAS7/TIGD5/ARP  
BIN1/PALLD/DYNLRB1/CCT2/LMNA/ADAMTSL5/DYNLL1/DYNC1H1/CAPN6/KNTC1/GAS7/TIGD5/ARP  
/HSPA8/NEU1/GM2A/SERPINE1/TCIRG1/SLPI/FUCA2/CD63/DOK3/STK11IP/RNASET2/FPR1/STX1  
LLD/DYNLRB1/CCT2/LMNA/ADAMTSL5/DYNLL1/DYNC1H1/CAPN6/KNTC1/GAS7/TIGD5/ARPC3/BEX4  
T4/MT3/TPPP3/DYNLT1/HAUS1/ACTG1/RSPH1/TUBB4A/DAPK3/CSNK1D/KRT8/KIF14/CAMSAP2/HC  
/GCN1/RRP36/CPSF6/MSI2/EIF4A3/ILF3/GRB7/RUVBL2/PRPF3/XPO5/SNU13/RPS3/SAMD4B/MSI  
A/MBD1/SMAD2/WBP2/SMAD3/SETD1A/BAZ1A/TP53/INO80E/TARDBP/KAT5/ETV3/SUZ12/HMGXB4/  
CNAB2/RAB3D/EMD/TBCD/CALM2/AKNA/BAG2/SRPRB/BCL10/HOOK2/BOD1/CSPP1/DNM2/CDK2AP2/  
PG4/S100A7/REXO2/LIMS1/ARPC5/VCL/ZNF185/RPS7/TRIP6/RPL7A/ACTR3/RPS10/PTPN12/RPS  
100A7/REXO2/LIMS1/ARPC5/VCL/ZNF185/RPS7/TRIP6/RPL7A/ACTR3/RPS10/PTPN12/RPS15/CT  
PK1/CSPG4/S100A7/REXO2/LIMS1/ARPC5/VCL/ZNF185/RPS7/TRIP6/RPL7A/ACTR3/RPS10/PTPN  
AV2/CAV1/CUZD1/PTPRC/PLD1/SLC04C1/TNFRSF1B/CD59/VAPA/ATP8B3/NCSTN/SLC30A5/SURF4  
AP2/DNM2/LMO4/PTK2/ADAM17/INPPL1/AAK1/CD177/PDLIM4/ACTN1/MYO6/PACSLN2/LIMA1/CD2  
AR1/CHEK2/CENPQ/BOD1/HAT1/DCTN1/NBN/HNRNP/ERCC1/MIS18A/PHF6/THOC2/KIF22  
P1/SEC13/EEF1A2/RAB3D/HLA-DOA/NPRL3/ABCB9/STX7/VAMP8/RAB5C/WIP1/PSAP/VPS35/CFT  
/MRPL55/CHCHD1/ZNF622/RPL12/MRPS2/RPS18/RPS28/RPS17/PNPT1/RPL26L1/RRBP1/RPL22/G  
S3A/RPL14/RPL10A/AIM2/ZNF622/RPL12/PRKCB/NLRC4/RPS18/RPS28/RPS17/RPL26L1/TSC1/R

NKL1/SF1/HNRNPH3/ZMAT2/CWF19L1/SF3A1/GPATCH1/PDCD7/WAC  
S11/RPL31/MRPL42/MRPL22/MRPL58/MRPL38/MRPS30/MRPS27

AB3B/HGS/BIN1/NPC1/GPR107/F2RL1/ARPC2/RAB7B/PLEKHM2/PSENEN/SORT1/RAB35/PIP5K1C/  
UN1D5/PCGF2/RBX1/IKBKG/DR1/PRDM4/UBE2L6/RBBP7/CXXC1/LAS1L/SNRPG/RNF7/CUL4B/E2F6

2/ERCC2/E2F7/HOXB9/BRF2/PBX3/GTF3C3/MED17/SMAD3/GEMIN5/SUPT3H/TP53/TBPL1/TAF11/  
DE6G/MY01D/ADGRE2

CTN1/WTAP/NUCB2/SP140/BNIP3L/LBR/TMEM109/SREBF1/MY06/BCL2L1/SEPHS1/SYNE4/XP07/E

R2/UNC13A/FNBP1/MYL12B/MYH9/HIP1/EXOC6B/BFSP1/MYZAP/CTTNBP2/PARD6A

PAR1/GPR161/SYT11/HLA-C/IGF2R/VAMP3/KIF5B/RAB22A/SPARC/PIK3C2B/HYAL2/CD207/ATP6

SEC23B/TEX261/GGA2/FCGR1B/HIP1/TEPSIN/DVL1/ECE1/ARFGAP3/AFTPH/WNT5A/LRP2/SCYL1/  
1CC/GSK3A/LRFN4/RAB10/TNIK/ADAM23/WASF1/KCNK9/MAP4/GAD1/PPP1R1B/ABR/NSMF/EIF4A3.  
3/VEGFA/HEXB/ACTN1

0/PRPF4/THOC1/SFMBT2/HDAC5/CBY1/PABPN1/SRSF1/SRSF2/CASC3/SNRNP70/RBM4B/RBM8A/ME

NC4/SYT11/MYO1D/KIF5B/TIAM2/TRIM46/FKBP15/ARL8A/WHRN/PRKCB/DOCK7/KCNIP3/TRAK2/S

S1/SRGN/MAN2B1/OLFM4/CYB5R3/VEGFA/HEXB/ACTN1  
PF2/EXOC3/DSTN/CYTIP/PLEKHH2/RHOA/AP3B1/ACTN4/RAB27B/FNBP1L/SPTAN1/SNAPIN/TTL3.

GF1/BRCC3/PHC1/MED31

S1/SRGN/MAN2B1/OLFM4/CYB5R3/VEGFA/HEXB/ACTN1

RPS18A/NDUFS3/MTG2/MRPL43/MRPS9/MRPL50/NDUFA3/TIMM10B/SUPV3L1/TOMM20/UQCRFS1/MR

FB2/SFPQ/CACNG4/PPP1CC/GSK3A/CIT/WASF1/INPP5J/AGFG1/OSBP2/PPP1R1B/NSMF/ERO1A/EI

FN3/STAT3/PCBP2/CHRNA1/GAP43/CAMK2N1/TANC1/SYN1/SH2D5/DLG5/HNRNPH2/PICK1/DNAJB1

TTNBP2/ARHGAP44/NPTXR/NPTX1/WNT3A/CRTC1/LRFN3/USP46/STAT3/ITGB1

3/CAMK2N1/TANC1/SYN1/SH2D5/DLG5/HNRNPH2/PICK1/DNAJB1/RPS25/ADAM10/CHMP2B

RIM37/MEIS3/RBMX/NKAP/NCAPD3/APBB1/SRF/HMG2/MLLT6/RNF8/SIX1/ACTN4/HINFP/DNMT3B  
1/LMCD1/MTA3/NFATC4/TDG/CIITA/WWC1/SFR1/BCL10/PSMD9/USP21/HNRNPU/PIAS4/CTBP2/TH  
3/SRPK1/CSK/CHEK2/MAPKAPK3/CCND3/PRKAA2/ACVR1B/STK40/PTK2/CSNK2A1/TNK2/CCNJL/AA  
OCC/VWA1/RPL27/LUM/COL4A2/NUP155/SMTN/LLGL1/LAMB3/RPL35/MATN3/RPS20/VPS25/NUP10  
TBCD/VCP/NPRL3/RASAL1/SFRP2/CALM2/SIPA1/ARAP1/TBC1D7/BAD/SGSM3/DBNL/PSAP/ARHGAP  
BP3/CAPN10/BAIAP2L1/NRCAM/BRCA1/STX1A/KLC3/CORO1C/RAB3B/CDH6/BIN1/CORO7/PALLD/H  
SY/MATK/CCND2/PRKD2/DGUOK/STK10/CHKA/PRKCI/GRK2/HK1/DMPK/IP6K1/MAPK7/MAP3K6/AXL  
1/DYNC1H1/RAB7B/XRCC3/MYO19/RRAS/DDX49/ATP13A1/ERCC6L/RFC2/DDX11/RAB35/ARF3/KIF  
1/DYNC1H1/RAB7B/XRCC3/MYO19/RRAS/DDX49/ATP13A1/ERCC6L/RFC2/DDX11/RAB35/ARF3/KIF  
1/DYNC1H1/RAB7B/XRCC3/MYO19/RRAS/DDX49/ATP13A1/ERCC6L/RFC2/DDX11/RAB35/ARF3/KIF  
3/MYO19/RRAS/DDX49/ATP13A1/ERCC6L/RFC2/DDX11/RAB35/ARF3/KIFC2/DDX27/RAB24/DYNLT  
/VDAC1/ACTB/BCAR1/PFKM/CDK5/MLKL/FAM83H/WWC3/FGR/WAS/LCK/PTPN6/CASP1/PPP1CC/GSK  
/DVL2/PARP1/GCN1/CDKN2C/PTPN23/CADM4/MSH2/GRB7/CCND2/RPS3/POLA1/ACSL3/PRKD2/TRA  
/CNTNAP1/GNG5/IL1B/EHD2/BCAR1/PPIL1/STRN4/ETV6/STMN3/ADAM12/PLEKHA2/WAS/TAF9/PL  
OCS1/CKS1B/GPSM1/HSP90AB1/DYNLL1/RCAN3/ARHGEF19/PPP1R9B/PPP1R35/TBC1D1/CST2/RIN  
TGA2/IL1B/CTTN/CDH17/EIF2S3/PTPN6/RAB10/UBAP2/ADAM23/EVPL/PFN1/EPS15L1/GCN1/IBS  
BI2/BCAR3/CCZ1/MYO5A/ARHGDI1/ARFIP2/RIC8A/TBC1D10C/FMNL3/PARD6G/SERGEF/EIF2B5/P  
PPL1/PDLIM4/HNRNPU/FLII/MAP1A/NEBL/ACTN1/ADD3/MYO6/LIMA1/SSH3/CDK5R1/TNNC1/TLN1  
A/PDK3/IRAK2/MAP4K1/ATR/MAP4K2/MKNK1/ERCC3/CSNK2A2/RPS6KC1/SRPK2/STK35/VRK2/ADC  
SMARCA5/GTF2H1/PSMC5/TOR3A/SMARCA1/MSH6/HSPA13/ATP7A/SRCAP/ATP6V1B2/ATAD5/MORC  
ENND5A/SGSM3/ARHGEF3/SRGAP2/ARHGEF25/BICD1/RGP1/TBC1D22B/OPTN/ARHGEF11/RABGGTB/  
1D7/DENND5A/SGSM3/ARHGEF3/SRGAP2/ARHGEF25/BICD1/RGP1/TBC1D22B/OPTN/ARHGEF11/RAB



PREX1/ARHGAP22/ARHGAP27/RIC8B/ARHGAP17/LLGL2/RALBP1/ARHGAP33/EVI5L/ASAP3/RALGAP  
/PTPN1/SH3GLB1/OLFM4/RPL6/PAK2/PACSIN2/HSPA5/LIMA1/CD2AP/NOTCH3/CDK5R1/TLN1/EIF  
RAB22A/RAB3C/ARL3/EIF5B/RAB33A/ARL8A/GNG2/RGS4/RAB2A/RHOD/RAB7A/TUBD1/RAC3/RRAS  
BCR/RHOH/TIAM2/ARHGAP19/ARHGAP25/SRGAP1/IP07/PDE6D/TBC1D25/SESN2/RGS4/VAV3/SEC2

AD1/HUNK/MAP3K14/GSK3A/DPAGT1/CDK18/NUAK2/TNIK/SLA/FGFR2/CIT/ALDH18A1/PLK4/MST1  
F4ENIF1/SNRNP35/RBMS1

K2/HK1/DMPK/MAPK7/MAP3K6/AXL/PIP4K2C/RPS6KB2/BTK/DSTYK/STK25/VRK1/ITPKC/CSNK1G2.  
R2/RELA/NKD2/TRAF1/BLZF1/SUMO3/SMAD2/DERL1/KDM4A/CUL7/MUL1/XRCC5/SMAD3

ERL1/KDM4A/CUL7/MUL1/XRCC5/SMAD3/TSG101/TP53/PRKAR2A/CASP10/UBE2J1/CD40/ARRB1/R

HOBTB2/RAB9A/RAB40C/RAB13/GTPBP6/ARL1/RAB1A/RAB36/GNA13/RAB8B/RAB1B/MX1/GPN1/GT  
40C/RAB13/GTPBP6/ARL1/RAB1A/RAB36/GNA13/RAB8B/RAB1B/MX1/GPN1/GTPBP1/MFHAS1/ERAL

TPBP6/ARL1/RAB1A/RAB36/GNA13/RAB8B/RAB1B/MX1/GPN1/GTPBP1/MFHAS1/ERAL1/RHOH/RAB2.  
TPBP6/ARL1/RAB1A/RAB36/GNA13/RAB8B/RAB1B/MX1/GPN1/GTPBP1/MFHAS1/ERAL1/RHOH/RAB2.

1A/RAB36/GNA13/RAB8B/RAB1B/MX1/GPN1/GTPBP1/MFHAS1/ERAL1/RHOH/RAB22A/RAB3C/ARL11.

L8/EGF/PYY2/DKKL1

TPBP6/ARL1/RAB1A/RAB36/GNA13/RAB8B/RAB1B/MX1/GPN1/GTPBP1/MFHAS1/ERAL1/RHOH/PDE6  
TPBP6/ARL1/RAB1A/RAB36/GNA13/RAB8B/RAB1B/MX1/GPN1/GTPBP1/MFHAS1/ERAL1/RHOH/PDE6

NF4/E2F6/MYBBP1A/DRG1/NFYC/RERG/MED12/RERE/MEIS2/TAF12/ARID5A/TAF10/RARG/VGLL4/

6/WBP2/MED17/NCOA7/MAML1/SUPT3H/TSG101/TBPL1/TAF11/KAT5/MTDH/APEX1/MED14/TAF4/M  
B/METTL2A/DDX31/TRMT2A/SNRNP200/DDX20/DCP2/POLR3F/DDX51/MED20/POLR2B/DUS1L/CNOT



BE2E3/TRIM62/MED20/RNF121/WWP2/ARIH2/RNF126/RNF115/SKP1/ANKIB1/MED30/MKRN1/ATG3.

BL2/CENPB/RPS3/TFAP4/RBBP4/POLA1/TBX19/HNRNPAB/PAX8/SMARCC1/MCM8/MAFF/BEND3/MTF.



S3/CROCC/PARD6B/PTPA/LLGL1/KAT2A/ZNF207/CHMP1A/RANBP1/CETN2/LRRC61/ACTL8/KATNB1  
T1/LCMT1/NAA10/PCBP4/CASP2/BRSK1/IQGAP1/GMNN/MIIP/PRKDC/STIL/SSNA1/MAD2L2/CNOT1  
P1L/SH3KBP1/ADAM8/VLDLR/COL6A3/LYPLA2/CPNE1/VSIG1/CAP1/CCL2/SHC1/DAPK3/PIK3CD/Y  
ARD11/GPRC5B/RAC1/IL1B/GBA/CD47/RNF26/S100A13/NFAM1/FGR/LCP2/MAPK11/TGFB2/GPSM3  
1/TGFB2/GPSM3/PQBP1/PTPN6/IFI16/AGPAT2/CASP1/PML/IL12RB1/IL15/C5AR1/IL1R2/RPS3/  
AP2/ALOX15B/SULF2/TWIST1/GLMN/IL17RA/TNFRSF14/DHX9/IDO1/HEG1/ADORA2B/EREG/CCL19  
ABL1/VCL/PSMA1/SFRP2/KDF1/RPS7/NFATC4/PDCD10/FOXF2/PSMB5/IFT172/BCL10/PSMA4/TBX  
1/PPIA/ZC3H12A/RAB24/ACLY/BCL3/DYNLT1/CD68/NCKAP1L/ADAM8/CAPN1/CPNE1/C1orf35/CA  
TNIP2/DYNLT1/CD68/NCKAP1L/ADAM8/CAPN1/CPNE1/C1orf35/CAP1/PIK3CD/ASAHI/KPNB1/PLS  
/CD47/S100A13/FTL/NFAM1/FGR/PSMA5/NRAS/SERPINB6/PTPN6/PSMD13/AGPAT2/COMMD9/RAB1  
/COMMD9/RAB10/DYNC1LI1/GALNS/DSN1/SLC44A2/IMPDH2/ABR/ATP6VOC/PSMD11/PSMD1/C5AR1  
1/PPIA/ZC3H12A/RAB24/ACLY/BCL3/DYNLT1/CD68/NCKAP1L/ADAM8/CAPN1/CPNE1/C1orf35/CA  
C2/NBEAL2/OLR1/SLC2A5/GPI/PA2G4/SERPINB1/IRF7/PPIA/RAB24/ACLY/BCL3/DYNLT1/LAG3/  
SMD13/AGPAT2/COMMD9/RAB10/DYNC1LI1/GALNS/DSN1/SLC44A2/IMPDH2/ABR/ATP6VOC/PSMD11  
1/PSMB10/ETV6/PSMA5/TGFB2/CDH17/LCK/PTPN6/THOC5/PSMD13/CD27/IFI16/PSMC4/PML/CCR  
CASP8/TMEM98/VEGFA/LBR/TLR2/TMEM64/NKAP/ADGRG3/CD79B/SRF/RHOA/INHA/AP3B1/DOCK2/  
TNFRSF4/SLC39A10/FPR1/MNDA/ZNF580/THY1/SIRPA/SPON2/SOCS1/THEMIS2/IRF1/IRF3/C3AR  
CDC42/MUC20/CMKLR1/TLR5/PSMD4/GPATCH3/PSMD3/PSMD7/LILRB4/IKBK/ FADD/BTK/PELI1/C  
B29/MUC15/CACNB3/PLD2/PSMC3/STOML2/WIPF2/CD79B/CD38/RAPGEF1/MAP3K1/ELMO2/PSMC5/  
FC2/DDX11/ERI3/REXO4/LEF1/POLR2H/FGFR1/PPIA/CCT4/PNKP/OTUB1/BLM/FBXO5/DBF4/GTPB  
CP/WRAP53/UBQLN4/DCLRE1B/FAAP20/TDG/COPS6/EME2/CHEK2/CLSPN/RAD1/SFR1/CHD1L/HDAC  
5C/TBL1XR1/BABAM1/DR1/PRDM4/VRK1/CENPN/RBBP7/CXXC1/CUL4B/DPF2/INO80C/NTMT1/RERE  
PF3/EXOSC5/SNU13/SRRT/TTF2/PRPF6/RPL27/BARD1/FTSJ3/HENMT1/POLR2L/DDX41/DROSHA/A  
S21/EIF3K/RPS15/RPS16/MRPS15/THBS1/EIF3M/PUS7/RPL5/RPS27A/MRPL18/RPS12/JMJD4/SA  
P2B/GYG1/ARHGAP9/RHOF/TNFAIP2/SIRPA/RAB3B/HGS/DEGS1/HK3/CCT2/CD58/C3AR1/HSP90AB  
EMB/PRKD2/RALA/SEMA4B/GRB2/ARRB2/CALR/CXCL11/CCR5/SEMA4D/XCL2/CMKLR1/APP/SWAP70  
T9/NONO/AUNIP/CDK2/KDM1A/FANCA/PMAIP1/LYN/LIG1/KMT5A/SSRP1/WDHD1/WAS/TAF9/SWI5/  
/CDK2/MKKS/KIF14/KPNB1/PHLDB1/CAMSAP2/CLN3/DCTN2/KNSTRN/FKBP4/RAC1/CDK5/CHORDC1  
LE1/DCTN2/CDKN1C/PSMB4/IL1B/PSMB8/PSMB10/PSMA5/PTPN6/PSMD13/PSMC4/HAUS8/PML/DYN  
ODC1/ZNF703/PPARD/LEF1/CLEC11A/FGFR1/TGM2/LBH/SIRPG/NOP2/NCKAP1L/FBXO5/FGFR3/CA  
2/RBM10/USP39/SNRNP25/RBM15B/AHNAK2/LUC7L/TSEN15/RBM24/SF3B2/STRAP/LSM1/SFSWAP/  
L7/ANAPC5/HECTD3/CDC27/CDC34/HSP90B1/UBE4B/UBAC2/AUP1/MAEA/HSPA13/CAV1/DAB2IP/G  
BB4A/CNOT9/EVI2B/CDKN2B/CCL2/DAPK3/CSNK1D/ANAPC7/CDK2/LSM10/KIF14/DCTN2/KNSTRN/  
B/RPS3/PRKD2/CROCC/STX18/GRB2/FHOD1/CDC42/KAT2A/TGFB3/MTF2/RANBP1/SYT1/SWAP70/C  
D1/ARRB2/PTPA/PRKCI/TGFB3/GAL/GZMB/DNM1L/CTSD/HSPE1/PDCD5/KATNB1/FADD/GZMA/UTP1  
PS5/NELFB/MXRA8/PSMB4/LAMTOR5/APOBEC3G/RPS21/PSMB8/RPL7/RPL28/RTN3/PSMB10/CCL4/  
3/RPS3/SRRT/SAMD4B/PSMB3/TTF2/PRPF6/RPL27/BARD1/POLR2L/RNH1/DDX41/AGO2/SF3A3/CP  
AP/HMGA2/MORC2/HDAC5/PAGR1/ENY2/TADA3/SIN3B/HUWE1/PAF1/RRAP/HDAC8/PWP1/DDB1/SU  
IP2/IL18BP/HLA-DQA2/CNOT9/CPNE1/CCL2/CAPZA1/SHC1/TRIM31/TXLNA/PIK3CD/CXCL9/CXCL  
L52/CKAP2/NSF/RUBCN/CKAP5/MCTS1/MRPL48/DAP3/MRPS7/HSPA2/MRPL53/GSPT2/VCP/STMN2/  
A2/RPS15/RPS16/EIF3M/STYXL1/RPL5/NOL6/RPF2/BICD1/BMT2/POP5/NVL/LTV1/RPL6/EXOSC9  
ARHGDIB/FHOD3/HCLS1/PSTPIP1/TESK1/CDC42BPG/ITGB1BP1/ARPC5L/RAC1/EHD2/ACTB/BCAR1  
RAP1/CEP19/TBC1D7/CEP41/TTYH1/IFT172/DBNL/HSP90AA1/SRGAP2/DNM2/TCTEX1D2/DCTN1/N  
RAC1/EHD2/ACTB/BCAR1/RAP2A/CDK5/PDGFA/CD47/CTTN/MYADM/WAS/VIL1/SPECC1/NUAK2/TNI  
/PML/CCR1/MLF1/IL12RB1/FGFR2/CYP26B1/CD79A/LYAR/OSTM1/PARP1/IL15/PSMD10/PSMD11/  
ANKRD54/IRF4/AGO1/MYC/BGLAP/DMTN/PRMT6/DYRK3/CD4/IFNG/EIF2AK1  
/DAPK3/CXCL13/ARHGDIB/KIF14/HSPH1/JAG1/CD209/LYN/ITGB1BP1/CCL28/CARD11/TNC/RAC1  
E2D1/USP14/PSMD10/PSMD11/PSMD1/MVB12A/PTPN23/GPX1/TNFSF12/PSMA7/UBE2E1/FBXL6/US  
3CD/CXCL13/ARHGDIB/KIF14/JAG1/MITF/LYN/ITGB1BP1/CCL28/MCTP1/RAC1/ITGA2/PLA2G7/M  
1/SHC1/HDAC2/PIK3CD/RAP1GAP2/YWHAH/CAMSAP2/KDM1A/LYN/WNT7B/FKBP4/TNC/RAC1/CNTNA

DC42EP2/DNM1L/SYT3/SEMA4F/KATNB1/WRAP73/SEMA5B/STK25/ABI2/ARHGDIA/VIM/SCN1B/SEM  
ARD1/UBE2A/ASB1/ARRB2/NUP155/USP22/JADE2/CDC42/ATXN7L3/NUP107/PSMD4/CBX8/DCUN1D  
C1D1/GDI1/STX10/PPARD/GPI/SERPINB1/PPIA/ZC3H12A/PAM/BID/CCT4/BCAP31/UBE2J2/DVL3  
7/RPL28/CACNG4/NUP85/GSK3A/RAB10/PML/RPL39/VPS28/BYSL/RPL35A/UBE2D1/PARP1/MSH2/  
HSPA4/ITGB3BP/CAPZA1/RPSA/RANGRF/CSNK1D/DNAF5/MKKS/SV2A/FHOD3/CAMSAP2/HCLS1/AX  
S3/SAMD4B/PSMB3/DFFA/RPL27/DNASE2/RNH1/NUP155/DROSHA/AGO2/APOBEC3D/ALDOC/RPL35/  
RPL5/DUS2/GTF3C5/NOL6/RPF2/CTU2/BMT2/POP5/NVL/EXOSC9/EXOSC10/EXOSC7/WARS2/DDX56  
SERPINB6/PTPN6/PSMD13/AGPAT2/COMMD9/RAB10/DYNC1LI1/GALNS/DSN1/SLC44A2/IMPDH2/IL  
ARD/COR01B/LEF1/GPI/FGFR1/ZC3H12A/SVBP/SLC9A3R1/NCKAP1L/FBX05/GTPBP4/ADAM8/CCL2  
EMA4F/FADD/STX4/SEMA5B/CLEC7A/RACK1/SEMA3C/SEMA3E/IGF1R/LBP/PDCD6/CCL3/S100A7/C  
CCND3/BAD/BCL10/PTGER4/VCAM1/TWSG1/PTPN2/ADAM17/CASP8/TMEM98/IL20RB/PAK2/RAB29/  
SERPINB6/PTPN6/PSMD13/AGPAT2/COMMD9/RAB10/DYNC1LI1/GALNS/DSN1/SLC44A2/IMPDH2/IL  
EMB/PRKD2/RALA/SEMA4B/GRB2/ARRB2/CALR/CXCL11/CCR5/SEMA4D/XCL2/CMKLR1/APP/SWAP70  
10/MRPS17/MRPS21/EIF3K/RPS15/RPS16/MRPS15/THBS1/EIF3M/PUS7/RPL5/RPS27A/MRPL18/R  
1/PDCD5/FADD/GZMA/UTP11/CLEC7A/RACK1/MSX1/STPG1/DAP/RAD9A/IL20RA/HCAR2/PLEKHN1/  
2/KIF14/HCLS1/CLN3/NLE1/KDM1A/MITF/BIRC7/MIEN1/IL1B/LAMTOR5/WFS1/CBX4/CTTN/RNF1  
1/PDCD5/FADD/GZMA/UTP11/CLEC7A/RACK1/MSX1/STPG1/DAP/RAD9A/IL20RA/HCAR2/PLEKHN1/  
HTATIP2/KIF14/HCLS1/CLN3/NLE1/KDM1A/MITF/BIRC7/MIEN1/IL1B/LAMTOR5/WFS1/CBX4/CTT  
APC4/BAG6/BBS7/FAF2/TMEM67/DBB1/FBX044/SKP2/PSMB1/WWTR1/SUMO2/PSMB6/RPL11/CDC23  
CAMSAP2/HCLS1/TBC1D30/PMAIP1/LRFN1/TESK1/MITF/ITGB1BP1/ARPC5L/ATXN2L/HCF1/FKBP  
/ABL1/HEATR1/VCP/THBS2/PALM/ACTR3/ARAP1/HSP90AA1/CHD1L/MPP7/DNM2/SPIRE1/DCTN1/S  
1FIP4/RAC1/ITGA2/VDAC1/RPS5/NELFB/MXRA8/PSMB4/LAMTOR5/APOBEC3G/RPS21/PSMB8/TCP1  
D209/LYN/HCF1/SSB/RAB11FIP4/RAC1/ITGA2/VDAC1/RPS5/NELFB/MXRA8/PSMB4/LAMTOR5/AP  
ZAP1/IL1B/MAGED2/KDM5B/NCAPH2/TCP1/ADRA2C/ETV6/DEAF1/POC1A/PAQR8/DNMT3A/CALCA/P  
2/PRIM1/CDKN1C/AKAP8L/PSMB4/UBE2L3/PSMB8/PSMB10/PSMA5/PTPN6/PSMD13/PSMC4/SIRT7/  
3AR1/HSP90AB1/F2RL1/PRSS3/DYNLL1/DYNC1H1/ILF2/AMPD3/NPC2/NBEAL2/OLR1/SLC2A5/GPI  
ME3/TNIP2/LAG3/FLOT1/ACTG1/SMPDL3B/ADAM8/HLA-DQA2/NONO/ULBP2/CCL2/CAPZA1/TRIM31  
BA52/HLA-F/IFNAR2/MUC15/CDC37/PSMC3/UBE2D2/RBM14/NMI/MAP3K1/LGMN/DHX9/NR1H2/PSM  
EYL/HDAC2/CXCL9/CSNK1D/SULT2B1/MSR1/HCLS1/KDM1A/JAG1/LYN/WNT7B/GPRC5B/RAC1/CBFB  
MSH2/ZBTB17/PSMA7/TFAP4/RBBP4/PSMB3/BARD1/KAT2A/ZNF207/CBX5/CHMP1A/CALR/TOBP1/  
2/PTPN6/CALCA/MAP3K14/SOCS3/TNIK/DVL2/MST1R/PPP1R1B/PSMD10/GCN1/SMYD3/CDKN2C/C5  
0/WAS/CDH17/LCK/PTPN6/CD27/SAMSN1/IL12RB1/CYP26B1/IMPDH2/CD79A/LST1/IL15/SNX27/  
51C/HSPA2/RAD51D/MFF/NSFL1C/EME2/ACTR3/CHEK2/RAD1/ACOT8/BOD1/SPIRE1/CCSAP/VPS35  
LCK/PTPN6/THOC5/PSMD13/CD27/IFI16/PSMC4/PML/CCR1/MLF1/IL12RB1/FGFR2/CYP26B1/CD7  
OXB7/PSMD3/PSMD7/HEY1/MSX1/WDR1/SEMA3C/TRIM71/TIMELESS/SEMA3E/TFAP2A/WNT4/MED12  
FADD/BTK/PELI1/STX4/CLEC7A/RASAL3/GPR183/LBP/EXOSC3/BTN2A2/CCL3/EMILIN1/ZNF335/  
FADD/ECM1/TREM1/ANGPT2/WDR1/GPR183/LBP/CCL3/S100A7/GLG1/EMILIN1/CXCL17/AKIRIN1  
PARP1/SET/PSMD10/SMARCB1/GPX1/TACSTD2/DFFA/CAPZB/BAG3/DGUOK/SEMA4B/ARRB2/CDC42/  
ORO1B/LEF1/GPI/FGFR1/ZC3H12A/SVBP/SLC9A3R1/SRI/NCKAP1L/FBX05/GTPBP4/ADAM8/CCL2/  
S19/FADD/STX4/SEMA5B/CLEC7A/RACK1/SEMA3C/SEMA3E/IGF1R/LBP/PDCD6/CCL3/S100A7/CEM  
DKN2B/SHC1/KIF14/NLRC5/AXIN1/SLC11A1/TESK1/LYN/WNT7B/ITGB1BP1/BIRC7/GPRC5B/CDKN  
P30/AGFG1/ABR/C5AR1/SIPA1L3/MSH2/ARF4/RPS3/TFAP4/DNAJC10/PRKD2/SYDE1/PTPA/RUNDC  
NEB/TACSTD2/RPS3/CAPZB/GRB2/SYDE1/FHOD1/CDC42/KAT2A/CHMP1A/ARHGAP18/TGFB3/RANBP  
/CROCC/RIMS3/LLGL1/FHOD1/CDC42/KAT2A/STARD3/IL4R/VPS18/CHMP1A/SYT1/PPF1A3/CETN2  
CENPQ/BOD1/COPG2/RPS15/DNM2/C12orf4/PTK2/SPIRE1/DCTN1/BICD1/HNRNPU/LTV1/CTBP2/R  
/RNF157/PLXND1/ASCL2/PPP1CC/GSK3A/LRFN4/NDRG4/NAP1L2/TNIK/TUBB2B/DVL2/INPP5J/OX  
ACSN1/PPP2R5B/METRIN/PARD3/APBB1/SRF/CAPRIN1/RHOA/SLC25A12/RAPGEF1  
P2A/CDK5/NREP/CTTN/SPOCK1/ADRA2C/RNF157/MYADM/PLXND1/ASCL2/PPP1CC/GSK3A/NDRG4/N  
M2/FERMT1/NPEPPS/EHD1/SRI/ARHGAP1/LEPROTL1/RANGRF/CXCL9/YWHAH/HCLS1/BBC3/KDM1A/  
/MT3/TNIP2/BCL3/DYNLT1/NCKAP1L/AATF/NOC2L/ADAM8/PAK4/LAMP3/EVI2B/NONO/CCL2/SHC1  
/TGFB2/ZNF205/CACNG4/CHMP3/BANF1/CLTB/GSK3A/AP2M1/MYOF/DVL2/FOLR2/AP2S1/AGFG1/A

8/UBE2D1/RNF220/UBA1/USP14/PSMD10/RNF113A/PSMD11/RAE1/ZMIZ2/PSMD1/DCAF16/PSMA7/NEB/GORAB/MVB12A/KIF2A/ODF2/PTPN23/GRB7/RPS3/CROCC/STX18/BAG3/VCX/KAT2A/ZNF207/MO1/PACS2/RPL38/CLIP3/NSF/RPL23A/CEMIP/ZDHHC12/GGA1/RAB3D/TIMM13/MFF/RPS7/STAC/UP155/PRRX1/HSBP1/APP/DNAJB6/NUP107/CBX8/IER5/POLQ/MAPK7/RELL2/PPP1R15A/FUS/MAPLT7/RAC1/BCAR1/CD47/CTTN/STMN3/MYADM/LOXL2/WAS/TGFB2/VIL1/CIT/PFN1/WASF1/INPP5J/NCKAP1L/GTPBP4/ADAM8/PAK4/CCL2/SHC1/CXCL13/HSPH1/JAG1/CD209/LYN/WNT7B/CCL28/CAR/IFT172/DBNL/HSP90AA1/SRGAP2/DNM2/TCTEX1D2/DCTN1/NOTCH1/CEP164/ODF2L/HAUS7/INPP3/SEMA4F/KATNB1/WRAP73/SEMA5B/STK25/ABI2/ARHGDIA/VIM/SCN1B/SEMA3C/PMP22/PTPRF/SETN2/PSMD3/RBX1/PSMD7/RAD21/BABAM1/MTBP/RFWD3/CEP250/RPA2/CUL4B/HAUS6/NAE1/NDE1/NA1/MAD2L2/CNOT11/PSMD2/CENPE/PPP2R1A/RBBP8/CHMP4C/BRCA1/RBL1/NSMCE2/PCNA/TUBA1CH2/PIK3R6/OSM/IL17D/HAX1/LDB1/INPP5D/CIB1/ZNF683/PTPRC/YTHDF2/PAF1/IKZF3/ZNF16/WRAP53/MFF/NSFL1C/PDCD10/STAC/STX7/CSK/VAMP8/BAD/CENPQ/HSP90AA1/PRKAA2/VPS35/C/LC9A3R1/NCKAP1L/FBXO5/GTPBP4/ADAM8/CCL2/DAPK3/PIK3CD/CXCL13/MKKS/ARHGDIB/KIF14/CK1/SEMA3C/SEMA3E/IGF1R/LBP/PDCD6/CCL3/S100A7/CEMIP/ACVR1/CXCL17/AKIRIN1/ABL1/PBM4B/DHX8/RBM8A/METTL3/CSTF3/SF3B6/MAGOH/BNRNP3/HNRNPA0/TFIP11/CELF2/IK/HNRNPD/BM8A/METTL3/CSTF3/SF3B6/MAGOH/BNRNP3/HNRNPA0/TFIP11/CELF2/IK/HNRNPD/PRMT5/SNRNBM8A/METTL3/CSTF3/SF3B6/MAGOH/BNRNP3/HNRNPA0/TFIP11/CELF2/IK/HNRNPD/PRMT5/SNRN

CD47/S100A13/FTL/NFAM1/FGR/PSMA5/NRAS/SERPINB6/PTPN6/PSMD13/AGPAT2/COMMD9/RAB103/BTN2A2/CCL3/ZNF335/HSPD1/ABL1/SART1/HLA-DOA/FCGR2B/TNFAIP3/TOX/CSK/VAMP8/MILRRB2/ARRB2/CDC42/MUC20/CMKLR1/TLR5/PSMD4/GPATCH3/PSMD3/PSMD7/LILRB4/IKBK/GFADD/B/KHDRBS3/TSEN34/DHX9/RBM28/GTF2H1/RNMT/CCAR2/RBM10/USP39/SNRNP25/RBM15B/LUC7L/T4/AAAS/ANKRD54/PARK7/GEMIN8/HEATR3/EGR2/THOC3/HYAL2/IFNG/GEMIN6/SMN2/IPO7/PPP1R

BL/RALGDS/ABI2/BCAR3/RALB/ARHGDIA/ARFIP2/RASAL3/FGD1/RERG/RHEB/RAB4B/OBSCN/CHN1B/NAT10/MPV17L2/PSMA1/MYEF2/PSMB5/PSMA4/EIF3K/PSMD9/THBS1/PUS7/RPL5/RPS27A/HNRN

A/CD38/RAPGEF1/GAK/ACAP3/GPC2/NIN/ADCY6/DPYSL3/SNAPIN/AP2A1/IST1/ARF1/SNX3/DAB2

/S100A7/CEMIP/ACVR1/CXCL17/AKIRIN1/ABL1/PDCD10/TRIP6/TRADD/ACVR1B/PTK2/THBS1/ADM1/AURKAIP1/MRPL20/KIF5B/MYC/DMTN/LIX1L/DYRK3/MRPL24/MRPS16/MRPL55/CHCHD1/TBC1D/NSD1/TLK2/MAPK15/ANAPC15/TERF1/HNRNPA2B1/AKAP8/KMT2B/SUPT6H/KDM3A/CDK5RAP2/WBP22/ERCC1/VEGFA/RAB3A/ADD3/PIH1D1/EML2/MECP2/PPP2R5B/CDK5R1/ARHGAP28/PSMC3/TWIST1/D47/S100A13/FTL/NFAM1/FGR/PSMA5/NRAS/SERPINB6/PTPN6/PSMD13/AGPAT2/COMMD9/RAB10/COMMD9/RAB10/DYNC1LI1/GALNS/DSN1/SLC44A2/IMPDH2/ABR/ATP6VOC/PSMD11/PSMD1/C5AR1B4/PSMB8/PSMB10/PSMA5/PTPN6/PSMD13/PSMC4/SIRT7/HAUS8/PML/DYNC1LI1/CIT/PLK4/ANAPNAPC5/EREG/CNOT3/TFDP1/UBE2E2/EGF/DAB2IP/HMGA2/RPTOR/ATAD5/THOC1/PAGR1/PKD1/ANA2/DDX20/KPNA4/AAAS/ANKRD54/PARK7/GEMIN8/HEATR3/EGR2/THOC3/HYAL2/IFNG/GEMIN6/SMN14/SMC4/ITGB1BP1/KNSTRN/LIG1/KMT5A/RAB11FIP4/ANXA11/IL1B/BCAR1/CDK5/PDGFA/CDCA21/CCNJL/RPS27A/VEGFA/CCNE2/PLA2G1B/UBA52/DUSP7/MAP3K10/PIH1D1/CDC37/CDK5R1/PRKA5A/PDCD5/FADD/BTK/STX4/STK25/RACK1/MSX1/DAP/RAD9A/TIMM50/IL20RA/DPF2/MYBBP1A/PT/SAP3/MYO1C/SPIRE2/NCKAP1/PPP1R9A/LPAR1/PXN/B6/GTPBP1/HNRNPD/PSMA3/DCP2/HNRNPC/FXR1/SYNCRIP/EIF4G1/PSMB7/HNRNPA2B1/SUPT6H/E

1/BOD1/SPIRE1/CCSAP/FBXW5/HNRNPU/SYCE1L/CCNE2/MASTL/RAB11A/KIF20B/KIF22/NCAPD3/CACNB3/PLD2/PSMC3/STOML2/WIPF2/CD79B/CD38/RAPGEF1/ELMO2/PSMC5/UBE2N/CD247/INPP5/NANOS1/ETF1/RPL19/PSMC3/RPS11/EXOSC1/EIF3E/RPL13A/HNRNPR/RNASEH2C/POLR2D/ANP32A/DHX9/EDC4/RPL32/TNPO1/RPL30/PSMC5/CNOT10/RBM10/MEX3D/RBM24/CNOT3/LSM1/RPS9/KHS

MSAP1/ARFGEF1/CIB1/EVI5L/TMEM67/ADD1/FEZ2/PPP1R9A/IK/UCN/PHF1/CAPZA2/DCP2/BUB3/

/PPP1R9A/LPAR1/PLEKHM1/CCDC88A  
7A/RPTOR/PREX1/ARFGEF1/ADNP/ADD1/RYK/MYO1C/SPIRE2/FSTL4/NCKAP1/PPP1R9A  
9/DPH3/UTP23/RPP30/SUV39H1/PRKRA/PELP1/RPS9/WDR46/IMP4/TRMT2B/RBFA/RPS14/RPS27/  
NRA/CAV1/ATP7A  
/NELFCD/GTF2F1/CIB1/ZC3HAV1/LARP1/VPS4A/NECTIN2/YTHDF2/CTDP1/SRPK2/ZCCHC3/CNR1/

TG7/ATR/TP53BP1/HMGA2/ATAD5/MORC2/THOC1/PTPRC/HDAC8/PPARG/TTF1/TFIP11/SPIRE2/SM  
/RHBDD3/NKAP/RHOA/GLMN/CD38/INHA/AP3B1/TNFRSF14/IDO1/RUNX3/ZMIZ1/CCL19/XCL1/PIK  
PA1/SRF/CACNA1D/CD38/RFC5/MAPKAPK5/TPP1/SLC22A5/POLE3/RPA1/ANKRD11/SMARCAL1/STR  
DM/BECN1/PSEN2/VASN/HSP90B1/SUV39H1/PDK3/ATG7/EDNRA/CAV1/ATP7A/ERCC3/STUB1/BMP2  
S27/CIB1/RPL29/ZDHHC24/BAG6/SRP68/TRAM1/C2CD5/RPL13/ATP1B1/SSR1/MYO1C/RAB8B/RPL  
AD21/MTBP/RFWD3/CEP250/RPA2/CUL4B/HAUS6/NAE1/NDE1/CKAP5/DBF4B/BTN2A2/RAD51C/BTG  
XNDC12/IVNS1ABP/BCL2L1/PIH1D1/MEIS3/NDUFA13/TPD52L1/PLAGL2/STK3/YWHAG/IFI6/FAF1

US81

7/RPS6/RPF1/MRM2/RPL24/CHD7/RIOK1/RPL11/RPL10/RPS24/DDX31/ERAL1/WDR12/PDCD11/HE

3/RPS28/RPS17/NOLC1/GTF3C3/NOL11/ERI1/TP53/NSUN5P2/ZNHIT6/TSR1/RPP38/MRPS11

A/TPR/SRSF7/MCM3AP/NUP50/IFT81/USP46/IQSEC2

HLA-DOB/VAMP3/RAB3C/CTSL/CD207/RAB33A/PSMB7/HLA-E/NOD1/RAB7A/CLEC4A/ACE/NOD2/IK  
/ZNHIT6/ATXN2/C1QBP/MRPS11/SRSF10/LSM14A/MRPL22/PRMT7/PSIP1/AAR2/XAB2/PTBP2/SNU

S2/RPS28/LUC7L3/GEMIN5/EIF3C/DDX1/LSM3/ZNHIT6/ATXN2/C1QBP/MRPS11/SRSF10/LSM14A/

0













PGEF1/MRAS/PDPN/RAB27B/MAPKAPK5/HEG1/IFT22/EPS8L1/KITLG/KSR1/SSX2IP/NOTCH2/RHOB  
ADA3/SIN3B/HUWE1/PAF1/TRRAP/HDAC8/PWP1/DDB1/SUPT7L/ASXL1/USP3/MAP3K7/UCN/PRMT5/  
PLEKHG6/ARHGAP28/ADPRH/AGAP3/RAPGEF1/GPS1/ACAP3/STXBP5/DOCK2/EPHA2/SGSM1/CCL19/  
FA/TXN/MLKL/ADRA2C/FGR/LCP2/MAPK11/TGFB2/PTPN6/CALCA/MAP3K14/MIDN/SOCS3/TNIK/DV  
ALR/PRKCI/PRRX1/ZMYND8/SEMA4D/SYT1/APP/DNM1L/SYT3/SEMA4F/GDPD5/HEY1/KATNB1/SEMA  
RF1

F1/NPLOC4/TRAFD1/PSMB2/SH2B2/PDCD1/IRF7/ZC3H12A/PSME3/TNIP2/LAG3/FLOT1/ACTG1/NC  
25/RALB/PIFO/MAPT/CSPG4/DBF4B/CEMIP/PTGES3/TRAF7/EEF1A2/CXCL17/ABL1/STK24/WRAP5

EC4E/ZCCHC3/NFKBIL1/PSMB1/TLR8/MAP3K7/PSMB6/FFAR2/CNPY3/MFHAS1/ICAM2/PSMA3/IRF4  
PIN1/TFIP11/STK4/BTBD1/RPL11/EPB41/PARK7/IRF4/MBD2/IFNG/NSD1/EIF4G1/LHX2/SUMO3/

IM15/NLRC4/BPIFB1/PTPRS/CLEC4A/APPL2/RPS6KA3/TLR1/S100A1/NOD2/XRCC5  
/MUL1/TRIM56/IKKBK/LILRB1/DDX1/FGL2/RPS15A/C1QBP/NLRP3/TICAM1/CD40/CCL11/IL12A/



PS27A/SFRP4/PIAS4/BCL9L/TLR2/CSNK2B/TMEM64/UBA52/GLI1/AP2A2/CCDC88C/MESP1/ATP6A  
L5/RPS27A/FBXW5/USP21/PLK3/MAGEF1/MAP1A/EXOSC9/EXOSC10/EXOSC7/USP27X/HSPA5/FBXO  
A/RPL23/RNF4/WDR91/UBE2L6/RACK1/TMEM199/RNF7/CUL4B/TRIM71/TRIM25/PTTG1IP/RNF122  
OML2/VPS11/YWHAG/ATG13/COA1/IFI6/COA3/ATG9A/NRF1/NDUFS8/TIGAR/CCAR2/BECN1/NDUFA  
8A

ABCE1/MRPL45

KHN1/EIF2B5/RPL38/XPNPEP1/DRG1/MRPL52/KHDRBS1/HPGDS/ABCG1/RPL23A/MCTS1/PIWIL4/M  
L/RPL23/RNF4/UBE2L6/RACK1/RFWD3/NOSIP/RNF7/CUL4B/TRIM71/TRIM25/ZNF598/UBE20/PTT  
7A/FBXW5/USP21/PLK3/MAGEF1/MAP1A/USP27X/HSPA5/FBXO45/UBA52/CD2AP/EDEM2/TRPC4AP/  
KLHL42/VCP/PSMA1/TNFAIP3/USP5/NSFL1C/UBQLN4/RPS7/KCTD5/FOXF2/BAG2/RNF216/PSMB5/  
OTCH1/RPS27A/SFRP4/PIAS4/BCL9L/TLR2/CSNK2B/TMEM64/UBA52/GLI1/AP2A2/CCDC88C/MESP  
/XYLT2/UGDH/POMT2/FUT3/NUP85/MUC5B/NUP43/DPAGT1/GMPS/IMPDH2/BGN/PARP1/IL15/A4GA  
BID/MT3/BCAP31/EEF1D/TNIP2/DYNLT1/DVL3/KISS1/MLST8/FGFR3/ADAM8/CPNE1/CCL2/SHC1/  
GALT6/HS6ST2/ARFGEF1/FBXO6/TMEM106A/HS2ST1/ST8SIA4/BMP2/RAB1A/GCNT1/CST3/B3GNT8  
T4/ARFGEF1/PTPRC/LMAN2L/VPS4A/NECTIN2/RAB1A/BAG6/RFX2/ATP2A2/ABCA7/STAM/TMEM38A  
IM27/AAAS/SETDB1/TRIM62/CD4/APOBEC3F/WWP2/HYAL2/CTSB  
U2F2/GON4L/PPP2R3C/TSC1/RPL22/FUT7/CD80/TP53/SOX13/RASGRP1/FGL2/LILRB2  
MA4/PTGER4/PSMD9/CASP8/RPS27A/MAVS/DMBT1/OPTN/PAK2/TLR2/MUC6/UBA52/HLA-F/MUC15/  
/MAPK15/HAUS2/IQCG/ATG3/CDK5RAP2/PTPDC1/ACTR2/IFT140/CNTROB/CEP135/TMEM80/RILPL  
17/FRMD6/ADD1/ASAP3/MY01C/ATP2A2/SPIRE2/ABRACL/NCKAP1/PPP1R9A/LPAR1/PXN/CCDC88A  
3/CELSR3/TUB/MAPK15/HAUS2/IQCG/TTC21A/ATG3/CDK5RAP2/BBS12/PTPDC1/ACTR2/IFT140/C

21/PLK3/MAGEF1/MAP1A/USP27X/HSPA5/FBX045/UBA52/CD2AP/EDEM2/TRPC4AP/RNF213/PSMC3  
119/TESMIN/HOXD9/AXL/PRDX4/ANGPT2/MMP19/CCT8/KHDRBS1/HPGDS/TTC26/WNT4/SOHLH2/PI  
TDRKH/HSF2/APP/MYBL1/NCOR2/CETN2/TMEM119/TESMIN/AXL/PRDX4/ANGPT2/MMP19/APOL2/KH  
P/MYBL1/NCOR2/CETN2/TMEM119/TESMIN/AXL/PRDX4/ANGPT2/MMP19/APOL2/KHDRBS1/HPGDS/T  
/TM9SF4/C2CD5/CNR1/MYO1C/ATP2A2/CASK/YIPF5/TBC1D20/EFCAB7/RBM22/AAAS/PARK7/USP3

PH3L/CENPJ/CACNB3/ALOX15B/CDK5R1/UBR5/TWIST1/APBB1/GLMN/VPS11/CD38/YWHAG/ATG13/





1/HDAC2/CSNK1D/KIF14/HCLS1/AXIN1/SLC11A1/LYN/WNT7B/ITGB1BP1/BIRC7/GPRC5B/RAC1/URFGEF1/RIC8B/ARHGAP17/LLGL2/RALBP1/ARHGAP33/EVI5L/ASAP3/RALGAPB/RSU1/DOCK8/PIN1C/MAEL/ZNRD1/TP53/EIF1/SUZ12/MSL3/BAZ1B/TPR/EZH1/PRMT7/NUP50/STAT3/TWISTNB/JARI



VOC/APH1B/EP515L1/LOX/MVB12A/CADM4/ATP6V0E1/ARF4/MATK/GRB7/NCOA5/PRKD2/SMARCC1/  
/ERCC1/PRSS21/HEXB/MASTL/BCL2L1/GLI1/MEA1/SSTR2/TARBP2/GORASP2/TEX11/IFT20/RNF8  
RACK1/ZNF675/IGBP1/RGS3/TNIP1/IGF1R/MAPT/STK38/NF2/BTN2A2/EMILIN1/UBXN1/PKIA/AB  
  
/TSC1/TSG101/TP53/FEZ1/SPTLC2/CHMP4A/SMCR8/MCOLN1/ATP6V1D/CLEC16A/VTA1/RNF41

11A1/LYN/WNT7B/ITGB1BP1/BIRC7/GPRC5B/RAC1/UNC5CL/IL1B/RAP2A/CDK5/PDGFA/LAMTOR1/  
10/PIH1D1/DGKQ/CDK5R1/PRKAR1B/TPD52L1/DAXX/RHOA/STK3/RAPGEF1/ATG13/ATP2B4/PRKAG

3/SUDS3/YOD1/USP28/PSMD6/GATA3/USP4/TGFBR1/PSMC2/USP32/PSMA6

LR2/HSPA5/DDX56/RAB11A/KIF20B/PACSL1/PPP2R5B/METRN/APBB1/SRF/CAPRIN1/RHOA/RAPG  
EMA3E/MAPT/RERE/SSBP1/CHN1/ZNF335/EXT1/ABL1/STK24/VCL/RASAL1/MFF/NFATC4/OPA3/KE  
2/NFATC4/GDF11/KEL/DENND5A/DBNL/PLXNC1/DNM2/PTK2/STYXL1/NOTCH1/FIG4/MOB2/LLPH/V  
RERE/CHN1/ZNF335/EXT1/ABL1/STK24/VCL/RASAL1/NFATC4/KEL/DBNL/PLXNC1/HSP90AA1/SRG  
A-DRB5/CARD11/GPRC5B/FPR3/MUC3A/RAC1/CBFB/PSMB4/IL1B/ACTB/BCAR1/CTSS/CD47/PSMB8  
EURL1/EIF4E2/PYM1/EIF2B1/AGO1/EIF5B/FXR1/EIF2AK1/SYCRIP/EIF4G1/CNOT2/EIF2B2/SE

HA2/FAM3A/SEH1L/TLR7/ATG7/ZC3HAV1/PTPRC/CLEC4E/RAB1A/ZCCHC3/CXCL10/IFITM2/SKP2/  
K2/ADNP/NAIF1/EAF2/PPARG/RYK/PIN1/FSTL4/UCN/TRIM32/SEMA3F/MEGF8/TCHP/KAZALD1/HY

USP32/PSMA6

LC3A2/SIRPG/CYTH2/FLOT1/EHD1/ACTG1/NCKAP1L/SH3KBP1/VLDLR/MYO1G/ATP6V1H/CAP1/CCL  
/LZTS1/ZMYM4/RAB11A/IFRD1/CDK5R1/METRN/FAM171A1/SRF/CAPRIN1/RHOA/ENPP2/ACTN4/PD  
/LMO4/PTK2/THBS1/ADAM17/PTPN1/RPS27A/NBN/VEGFA/PFKFB2/PLA2G1B/PAK2/TRAF4/UBA52/

CTB/CDK5/JCHAIN/DNER/CD47/ANKRD13B/CTTN/FGR/CD300LF/LOXL2/WAS/CACNG4/PI4KB/NECA  
SCAN2/METTL3  
RAP1/CASC3/SNRNP70/RBM4B/YTHDF1/RBM8A/METTL3/PIN1/MOV10/ABCA7/EIF2B4/UCN/OGFOD1

/LEF1/POLR2H/SFRP5/FGFR1/HIP1R/SLC9A3R1/NCBP2/MT3/FERMT1/ACTG1/NCKAP1L/FGFR3/SH  
35/EXT1/ABL1/STK24/VCL/RASAL1/NFATC4/KEL/DBNL/PLXNC1/HSP90AA1/SRGAP2/DNM2/PTK2/



/GRB2/PARD6B/AKIP1/LLGL1/CDC42/LAMB3/CALR/MATN3/SEMA4D/APP/DNM1L/MAPK7/SEMA4F/A  
7/BRD4/RELA/NSD1/VPS33B/DYDC2/KMT2B/NAA50/SUPT6H/KDM3A/SUMO3/WBP2/SEN5/ZMPSTE2

AIP1/RNASE2/LYN/IL1B/LAMTOR5/IL2RA/APOBEC3G/JCHAIN/CD47/RNF26/TMEM229B/FGR/CCL4  
EL/DBNL/PLXNC1/HSP90AA1/SGAP2/DNM2/PTK2/NOTCH1/MAP1A/LLPH/VEGFA/RAB3A/LZTS1/FB  
AIP1/RNASE2/LYN/IL1B/LAMTOR5/IL2RA/APOBEC3G/JCHAIN/CD47/RNF26/TMEM229B/FGR/CCL4  
8/HSP90AA1/RPS15/SGTA/RPS16/CASP8/RPL5/RPS27A/SH3GLB1/RPS12/TOMM22/MAVS/RPS4X/R

37/CDK5R1/TECPR1/VPS37B/VPS11/ATG13/IFT20/CLTC/PRKAG1/MTERF3/FNBP1L/WDR41/ATG9A  
1/DEFB1/SLC11A1/PMAIP1/RNASE2/LYN/IL1B/LAMTOR5/IL2RA/APOBEC3G/JCHAIN/WFS1/CD47/  
L10/TRIM71/TNIP1/DPH7/ZNF598/PLEKHN1/EIF2B5/RPL38/DRG1/MRPL52/KHDRBS1/RPL23A/CE  
37/CDK5R1/TECPR1/VPS37B/VPS11/ATG13/IFT20/CLTC/PRKAG1/MTERF3/FNBP1L/WDR41/ATG9A

D247/MSH6/IL13RA2/TP53BP1/CD84/ATAD5/THOC1/DCLRE1C/INPP5D/DUSP22/ZNF683/CD3G/PT

1/EPHB2/SLC9A6/EPHA10/YTHDF1/ADNP/FEZ2/CNR1/RYK/PIK3CB/PLXNB2/KIF3A/FSTL4/PLCG1  
C3/HDAC5/TAF3/CIB1/PKD1

B/ANXA4/GSDMD/ACSL3/BARD1/BAG3/ICA1/IL4R/TGFB3/ADRA2A/SNX12/TLR5/HK1/GZMB/DNM1L  
4/MUL1/TSC1/USP33/CPTP/TP53/FEZ1/SPTLC2/DAPL1/CHMP4A/FBXL2/TFEB/KAT5/SMCR8/MTDH

8/ADRA2C/PSMB10/PHB/PSMA5/CCL4/MAPK11/NRAS/TGFB2/PTPN6/PSMD13/RASA3/CD27/PSMC4/  
CD79A/UBE2D1/PSMD10/PSMD11/PSMD1/C5AR1/PSMA7/RPS3/PRKD2/TRAF3/PSMB3/GRB2/ARRB2/  
/ADD3/LIMA1/RAB11A/IFRD1/CDK5R1/ARHGAP28/SRF/DSTN/PLEKHH2/RHOA/HTR1D/CD38/MTPN/  
CP/PSMA1/SFRP2/TNFAIP3/NFATC4/PLCB2/PSMB5/PSMA4/PRKAA2/PSMD9/CSNK2A1/VPS35/NOTC

F/RHOA/CD38/HBEGF/MTPN/NIN/CCAR2/CYP27B1/IST1/EIF4G2/CDK11A/OGFR/RPTOR/CIB1/IL1

MTMR1/DUSP14/PTPRA/PPP1CB/DUSP15/PTPRS/PPP2R5D/CNEP1R1/PTPN14/TSC1/PPP2CA/PTPDC

8/ADRA2C/PSMB10/PHB/PSMA5/CCL4/MAPK11/NRAS/TGFB2/PTPN6/PSMD13/RASA3/CD27/PSMC4/







RPL24/ETV1/SEMA3F/MEGF8/EGR2/ULK1/CELSR3/TRIM46/XK/SEMA6B/TRIO/LHX2/PTPRA/SEMA4

PC9/FASLG/HPS4/TGFBRAP1/SAMD9/STX8/MFSD14A/RAB38/GBF1/SNAP23/STX12/ZEB2/CTSZ/TR



APC1/UBE2K/PSME2/TRIM5/TRIM3/TRIM36/HACE1/UBE2V2/PSMD6/GPS2/FBX030/PSMC2/PSMA6/  
MAP4K3/DACT1

H1/SDF4/CXCL10/RBM4B/METTL3/DDB1/JUNB/SCARA3/TRIM32/CASP3/PDE6G/NMT1/MYC/HUS1/F  
A/LAMTOR5/CAPNS1/CDK5/LAMTOR1/CTTN/PSMB8/PSMB10/PHB/PSMA5/DNAJB2/TAF9/PSMD13/NU

F1/MYB/WDR82/SETD5/PICK1/METTL22/GATA3/NSUN2

SK3A/NUP43/OSBPL7/PML/DRAM2/SET/ATP6VOC/USP14/PSMD10/PSMD11/RAE1/PSMD1/ATP6VOE1

1/SFRP2/RPS7/IFT172/BCL10/ACVR1B/VASH1/OSR2/LMO4/DAD1/CASP8/NOTCH1/FUT8/MBD3/FK  
ARHGAP19/ARHGAP25/SRGAP1/TRIO/MAP4K4/RHOD/PIK3R2/EPS8L2/KCTD13/VAV3



1/CDHR2/ABL1/GNG4/RASAL1/SFRP2/GHRHR/BRAT1/OPA3/SIPA1/TMC8/WWC1/DBNL/TBX2/ACVR1  
NDC12/IVNS1ABP/BCL2L1/CD2AP/DUSP7/PPP2R5B/NDUFA13/TWIST1/ADGRG3/RHOA/RAPGEF1/AT

NC2/EXT1/ABL1/SFRP2/RPS7/IFT172/BCL10/ACVR1B/VASH1/OSR2/LMO4/DAD1/CASP8/NOTCH1/

T2/KIAA0319L/LMTK3/HLA-B/QPCTL/GALNT6/GOLGA3/TRAPPC1/STX18/FUT2/FUT6/ICA1/PARM1  
8/PCGF2/XRCC6/TELO2/RAD21/NIFK/NABP1/RBBP7/RAD9A/RPA2/DPF2/POLD3/INO80C/TIMELES  
SAH1/CLN3/SLC36A1/BBC3/SLC11A1/RNASE2/LYN/HLA-DRB5/SLC26A11/ANXA11/ATP6V1E1/IL1  
/RBMX/KIF22/BAZ2A/NCAPD3/EIF3E/SRF/HMG2/ACTR5/GATAD2A/DHX9/SMARCA5/STAG3L4/RUN  
MT/ACTL6A/IRF1/COPS9/ARPC2/DYNLL1/STAT1/SPDL1/XRCC3/RRS1/KNTC1/HDAC1/PARPBP/ARP  
/GPRC5B/ZNF593/SSRP1/UTP18/RBM19/MAGED2/TULP3/S100A13/UTP14A/RPL7/ETV6/NPM3/RCN  
SAH1/CLN3/SLC36A1/BBC3/SLC11A1/RNASE2/LYN/HLA-DRB5/SLC26A11/ANXA11/ATP6V1E1/IL1  
VPS11/AP3B1/CLTC/AP1S1/AP1S3/AP1S2/AP2B1/WDR41/IFITM3/MANBA/SPNS1/BRI3/SNAPIN/A  
HLA-DQA2/LAMP3/CPNE1/ATP6V1H/CAP1/KCNQ1/PIK3CD/ASAHI/CLN3/SLC36A1/BBC3/SLC11A1/  
T1/IQCB1/EMD/TBCD/RAD51D/PSMA1/NSFL1C/DCLRE1B/RPS7/CALM2/AKNA/NME7/CEP19/CEP41/  
7orf31/ABCA2/HAUS8/DYNC1LI1/MLF1/PLK4/IFT80/TUBG2/TBC1D31/MVB12A/KIF2A/ODF2/PTP  
7/KATNA1/PLK3/HNRNPU/HAUS5/MAP7D3/RAB11A/PLEKHG6/NEDD1/EML2/KIF20B/KIF22/ARL8B/  
CNN2/CDC42/CALR/MTF2/SPRY4/AFAP1/RPS19/RPLP0/RPL18/CBL/RPL23/ABI2/VIM/ITGB8/RPL  
P8/RAB5C/WIP1/VPS35/VPS45/RPS27A/SCAMP2/CFTR/PDLIM4/LTV1/FIG4/MCOLN3/OPTN/PACS  
NQ1/FZD2/SV2A/MSR1/SYNGR3/KDELRL/SLC11A1/RAB20/HLA-DRB5/WNT7B/GPRC5B/MCTP1/RAC1  
C5/TNNI3/ABL1/VCL/ZNF185/TRIP6/ACTR3/BIN2/CENPQ/DBNL/PTPN12/VCAM1/CTNNA1/PTK2/A  
M25/UBE20/POLR3D/HNRNPM/S100BP/DRG1/MAPT/PRPF31/OBSCN/FAM118B/SNRPB2/PRPF19/CH  
/PEF1/ATP7A/CALM3/CUZD1/RAB1A/RAB8B/CD59/RAB1B/CCDC88A/NCSTN/SYT11/HLA-C/MCTP2/  
3/DYNLL1/DYNC1H1/ILF2/AMPD3/NPC2/NBEAL2/FSTL3/OLR1/SLC2A5/GPI/PA2G4/SERPINB1/PP  
1/SLC11A1/RAB20/HLA-DRB5/WNT7B/GPRC5B/MCTP1/RAC1/TMEM163/WFS1/LAMTOR1/CD47/SMAG  
APG2/NUP37/PPP1CA/PPARD/INCENP/CBX3/DVL3/BLM/NHP2/SCMH1/ITGB3BP/HDAC2/AUNIP/CDK  
39A13/HLA-DQA2/LYPLA2/CSNK1D/SLC35B2/KDELRL/CLN3/SLC35A2/DEFB1/UXS1/HLA-DRB5/WN  
A2/SLC15A3/AP2S1/OSTM1/BGN/UBA1/ATP6VOC/PSMD1/TMEM63A/KPTN/PADI2/YWHAB/SLC22A17  
IP3/SLC48A1/GGA1/HLA-DOA/STX7/SNX20/RUFY1/VAMP8/RAB5C/WIP1/VPS35/VPS45/RPS27A/  
INO80C/TIMELESS/POLR3D/PRPF19/ESCO2/NAT10/RARG/DNA2/HSPA2/RAD51D/MTA3/DCLRE1B/E  
BPL7/RAB10/GDPD1/OSBP2/SET/SBF1/CDK7/TNFSF12/NDOR1/YWHAB/GALNT6/ANXA4/ACSL3/CAL  
HAB/RPS3/RPL27/RALA/CNN2/CDC42/CALR/MTF2/SPRY4/AFAP1/RPS19/RPLP0/RPL18/CBL/RPL2  
/PDGFRA/RTN3/NRAS/B4GALT2/XYL2/PI4KB/COPZ1/FUT3/CLTB/RAB10/SMPD4/CIT/LST1/A4GAL  
VPS11/AP3B1/CLTC/AP1S1/AP1S3/AP1S2/AP2B1/WDR41/IFITM3/MANBA/SPNS1/BRI3/SNAPIN/A  
C3/BEX4/WIPF1/LZTS2/MARK2/PDLIM3/SH2B2/KRT18/INCENP/CORO1B/KIFC2/CCT4/MT3/TPPP3  
C3/BEX4/WIPF1/LZTS2/MARK2/PDLIM3/SH2B2/KRT18/INCENP/CORO1B/KIFC2/CCT4/MT3/TPPP3  
A/MNDA/PTGES2/RAP2B/GYG1/ARHGAP9/RHOF/STX6/BMF/SIRPA/RAB3B/DEGS1/BIN1/HK3/CCT2/  
/WIPF1/LZTS2/MARK2/PDLIM3/SH2B2/KRT18/INCENP/CORO1B/KIFC2/CCT4/MT3/TPPP3/DYNLT1  
LS1/PSTPIP1/HSPH1/CCT7/DCTN2/KNSTRN/REEP2/FKBP4/RAC1/CDK5/FAM83H/CTTN/TCP1/KIFC  
1/TTF2/PRPF6/RPL27/BARD1/HNRNPAB/NCL/FTSJ3/HENMT1/EIF3H/DDX41/CDC42/AGO2/CBX5/C  
TAF4/SLX4/ACTR8/NACC2/MEN1/NFRKB/SP1/TNKS1BP1/ACTR6/NFATC1  
CCSAP/DCTN1/HAUS7/KATNA1/BICD1/HNRNPU/MAP1A/HAUS5/DYNC1I2/RAB11A/TUBB3/EML2/KIF  
15/CTNNA1/DNM2/PTK2/RPS16/ADAM17/RPL5/CAPN2/FLII/RPS4X/RPL6/ACTN1/PACSIN2/HSPA5  
NNA1/DNM2/PTK2/RPS16/ADAM17/RPL5/CAPN2/FLII/RPS4X/RPL6/ACTN1/PACSIN2/HSPA5/LIMA  
12/RPS15/CTNNA1/DNM2/PTK2/RPS16/ADAM17/RPL5/CAPN2/FLII/RPS4X/RPL6/ACTN1/PACSIN2  
/IGF2R/MOSPD2/SPARC/DGAT1/ATP6VOA1/VAMP1/ARL8A/DNAJC13/MMP25/RAB7A/UBR4/MCEMP1  
AP/TUBB3/PACSIN1/DUOX1/TLN1/APBB1/PLEKHH2/RHOA/PDPN/FAP/PARVB/DPYSL3/EPS8L1/EPH  
R/SH3GLB1/MAN2B1/LTV1/MCOLN3/CCZ1B/GNAI3/GLIPR1/MYO6/TMBIM1/SLC17A5/SLC15A4/UBA  
EMIN5/MRPL21/RPS15A/NDUFA7/MRPS26/APEX1/MRPS11/RPL31/NUFIP2/MRPL42/BTF3/MRPL22/  
PL22/GEMIN5/IKKBK/RPS15A/DAG1/CASP10/RPL31/NLRP3/TICAM1



IRF7/SNX10/RAB24/FLOT1/PRSS16/EHD1/CD68/ARHGAP1/LEPROTL1/HLA-DQA2/LAMP3/CTSE/KC  
/DPF2/POLD3/IN080C/POLR3D/IGF1R/DCAF15/PDCD6/POLR3H/PRPF31/POLR3C/MED12/EID3/ZN

GTF2E1/KAT5/APEX1/MED14/TAF4/SNAPC1/TAF2/GATA4/NFATC1

IF5A/DNAJC2/IP09/NXT2/FAF1/PSEN2/RBM15B/TNRC18/TOR3A/IST1/KPNA6/SEH1L/RANBP3/HA

VOA1/HLA-E/RAB7A/APPL2/TLR1/MPEG1/CD163/PLEKHG5

DDHD2

/KPTN/ARF4/PSMA7/LRP8/SYT12/RPS3/RIMS3/ICA1/ARRB2/DROSHA/CDC42/VPS18/ZMYND8/SYT

TTL3/EAF2/ACIN1/PIN1/TFIP11/IK/PPP1R8/PSKH1/POLDIP3/THOC7/USP36/ZC3H18/THOC3/DY

YP/TSC1/SHTN1/EXOC6/RAC3/UNC13A/MAP3K12/ELK1/FEZ1/NEFL

/CTBP1/GMFB/MAEA/ATG7/HAX1/CAV1/CCDC65/RIC8B/CNKSR1/ACTR1A/LLGL2/BBS7/CCDC40/C2

PS35/MRPS33/MRPS10/NDUFA2/MRPL45/NDUFB10/BCS1L/NDUFB5/AGK/NDUFAB1/MRPL41/MRPL49

F4A3/LMTK3/DMWD/ARF4/LRP8/RPS3/ARRB2/CDC42/AGO2/TMEM50A/TGFB3/ZMYND8/APP/GAL/KL

/NLGN2/RPS25/ADAM10/CHMP2B



/DHX9/SMARCA5/DNAJC2/STAG3L4/GTF2H1/CRTC2/RBPJ/TNRC18/CDYL/UXT/SUV39H1/MSH6/PEL  
RA/MED27/BCL9L/ACTN1/HSF4/COPS5/MAP3K10/MECP2/CENPJ/AIP/RBM14/TCERG1/NMI/DAXX/A  
K1/PLK3/CCNE2/MARK4/PAK2/MASTL/CDK11B/CSNK2B/TBRG4/LMTK2/MAP3K10/TP53RK/CDK5R1/  
7/RPL18A/COL8A2/EPB41L1/RPS19/ECM1/RPLP0/RPL18/RPL23/VIM/KRT20/COPG1/EPB41L3/MR  
11A/BCL10/SRGAP2/UBA2/TBC1D22B/ARHGEF11/RAB3A/SMAP1/PAK2/PLEKHG6/DGKQ/PPP2R5B/C  
SP90AB1/ARPC2/MYO19/CAPN6/PLEKHM2/GAS7/RCAN3/PPP1R9B/TIGD5/ARPC3/BEX4/WIPF1/S10  
/PIP4K2C/RPS6KB2/BTK/DSTYK/STK25/NME6/VRK1/ITPKC/CSNK1G2/IGF1R/STK38/OBSCN/CCL3  
C2/DDX27/RAB24/DYNLT1/GTPBP2/BLM/GTPBP4/ITPA/TUBB4A/MYO1G/ATP6V1H/MYO1F/ARHGDIB  
C2/DDX27/RAB24/DYNLT1/GTPBP2/BLM/GTPBP4/ITPA/TUBB4A/MYO1G/ATP6V1H/MYO1F/ARHGDIB  
C2/DDX27/RAB24/DYNLT1/GTPBP2/BLM/GTPBP4/ITPA/TUBB4A/MYO1G/ATP6V1H/MYO1F/ARHGDIB  
1/GTPBP2/BLM/GTPBP4/TUBB4A/MYO1G/ATP6V1H/MYO1F/ARHGDIB/KIF14/DCTN2/RAB20/RAC1/A  
3A/MIDN/DVL2/PARP1/GCN1/CDKN2C/PTPN23/CADM4/MSH2/GRB7/CCND2/RPS3/POLA1/ACSL3/DU  
F3/GRB2/ARRB2/PARD6B/LLGL1/CDC42/MTCP1/SLC12A7/ADRA2A/TELO2/MAPK7/PPP1R15A/CD8A  
XND1/ADAM19/LCK/PTPN6/BANF1/SRSF12/CASP1/PPP1CC/MLF1/CIT/DVL2/INPP5J/MVB12A/GPX  
1/MARK2/ARHGAP39/GDI1/LEF1/SERPINB1/PSME3/ARFGAP1/HSPBP1/MT3/TBC1D10B/CCNO/PPME  
P/TACSTD2/YWHAB/GOLGA3/CAPZB/BAG3/CNN2/ARHGAP18/CALR/RANBP1/AHSA1/SWAP70/SH3GL1  
IFO/BICDL2/FGD1/NSF/TBC1D22A/OBSCN/BRK1/GGA1/IP013/HPS1/DENND3/TBC1D7/DENND5A/S  
/WIPF2/DSTN/PLEKHH2  
K2/CSNK1G1/CASK/STK4/MAP3K7/PSKH1/RIOK1/BCR/ULK1/DYRK3/BRD4/EIF2AK1/TLK2/MAPK15  
2/ERCC3/VPS4A/RALBP1/ATP1B1/MYO1C/AK6/ATP2A2/ACIN1/KIF3A/ABCA7/ABCF3/ATP2C1/ATP  
PAK2/RUSC2/PLEKHG6/DENND4B/RAB29/YIPF2/XPO7/ADPRH/RASSF5/RAPGEF1/IFT20/STXBP5/D  
GGTB/PAK2/RUSC2/GGA3/RILPL1/PLEKHG6/DENND4B/RAB29/YIPF2/XPO7/ADPRH/RASSF5/RAPGE

B/ATP1B1

3E/EXOC3/FNBP1L/RSL1D1/SPTAN1/EPS8L1/EPHA2/IST1/VASN/EIF4G2  
2/GEM/RAB6A/GNAS/TBCC/RAB28/TSR1

3B

R/STK32C/USP14/LMTK3/CDK7/COASY/MATK/CCND2/POLE4/POLA1/PRKD2/DGUOK/NANS/PGS1/ST

/IGF1R/STK38/OBSCN/CCL3/CDK19/ACVR1/FASTK/ABL1/STK24/PIM3/SRPK1/CSK/CHEK2/MAPKA

NF40/CCDC50/HLTF/PCBP2/GABARAP/USP13/UBE2K/STX8

PBP1/MFHAS1/ERAL1/RHOH/RAB22A/RAB3C/ARL11/POLR2B/ARL3/EIF5B/NUDT2/RAB33A/EIF2B2  
1/RHOH/RAB22A/RAB3C/ARL11/ARL3/EIF5B/NUDT2/RAB33A/EIF2B2/ARL8A/RAB2A/RHOD/RAB7A

2A/RAB3C/ARL11/POLR2B/ARL3/EIF5B/NUDT2/RAB33A/EIF2B2/ARL8A/RAB2A/RHOD/RAB7A/TUB  
2A/RAB3C/ARL11/ARL3/EIF5B/NUDT2/RAB33A/EIF2B2/ARL8A/RAB2A/RHOD/RAB7A/TUBD1/NOLC

/ARL3/EIF5B/NUDT2/RAB33A/EIF2B2/ARL8A/RAB2A/RHOD/RAB7A/TUBD1/NOLC1/RAC3/RRAS2/G

G/RAB22A/RAB3C/ARL11/ARL3/EIF5B/NUDT2/RAB33A/EIF2B2/ARL8A/RAB2A/RHOD/RAB7A/TUBD  
G/RAB22A/RAB3C/ARL11/ARL3/EIF5B/NUDT2/RAB33A/EIF2B2/ARL8A/RAB2A/RHOD/RAB7A/TUBD

VHL/MTA3/NFATC4/TDG/FOXF2/TRIP6/CIITA/WIPI1/BCL10/TBX2/PSMD9/LMO4/USF1/UBA2/CHC

AML2/GATA4/WNT3A/MED6  
2/THUMP2/POLR1C/POLR3A/PNPT1/RAD54B/ERI1/ZNRD1/DDX1/TDP2/METTL2B/AARS2/METTL6/



/RNF186/KCTD13/UBR4/RNF19A/MUL1/TRIM56/RNF10/RNF135/FBXL18/FBXL2/MIB2/UBE2R2/PP



2/PRRX1/HSF2/ZNF589/MYBL1/CC2D1B/GMEB1/XRCC6/HOXB7/TESMIN/MUTYH/HOXD9/HEY1/GTF3

/WRAP73/RNF4/CCDC120/CEP250/HAUS6/PARD6G/NDE1/CLIP3/DRG1/MAPT/CKAP2/TTC26/NTMT1  
1/PSMD2/RGS14/CENPE/PPP2R1A/RBBP8/CHMP4C/BRCA1/RBL1/NSMCE2/PCNA/TUBB6/PPP2R2C/X  
WHAH/KIF14/WNT7B/ITGB1BP1/RAC1/CNTNAP1/ACTB/RAP2A/CDK5/S100A13/CTTN/RNF157/PSMB  
/PQBP1/PTPN6/IFI16/AGPAT2/CASP1/PML/IL12RB1/IL15/C5AR1/IL1R2/RPS3/ANXA4/GSDMD/P  
ANXA4/GSDMD/PRKD2/TRAF3/ASB1/LUM/ARRB2/CD6/POLR2L/DDX41/IL4R/TGFB3/CMKLR1/APP/A  
/KPNA6/XCL1/TLR7/POLR2E/OSM/IL17D/IL17RB/PANX2/PTPRC/CLEC4E/CRLF2/ZCCHC3/TLR8/M  
2/PSMD9/LMO4/ADAM17/NOTCH1/MTHFR/HOXA5/VEGFA/CSNK2B/AP2A2/MESP1/KIF20B/SYNE4/PS  
P1/PIK3CD/ASAHI/KPNB1/SLC11A1/RNASE2/LYN/RAC1/CTSS/LAMTOR1/GNS/CD47/S100A13/FTL  
CR1/SLC11A1/RNASE2/LYN/RAC1/CTSS/LAMTOR1/GNS/CD47/S100A13/FTL/NFAM1/FGR/LCP2/PS  
O/DYNC1LI1/GALNS/DSN1/SLC44A2/IMPDH2/ABR/ATP6VOC/PSMD11/PSMD1/C5AR1/TMEM63A/PAD  
/TMEM63A/PADI2/TRAPPC1/GSDMD/STK10/GPR84/CNN2/ALDOC/LAIR1/PPN/CYSTM1/XRCC6/PSMD  
P1/PIK3CD/ASAHI/KPNB1/SLC11A1/RNASE2/LYN/RAC1/CTSS/LAMTOR1/GNS/CD47/S100A13/FTL  
TSTA3/CD68/NCKAP1L/ADAM8/CAPN1/MYO1G/CPNE1/C1orf35/CAP1/ULBP2/PIK3CD/ASAHI/KPNB  
/PSMD1/C5AR1/TMEM63A/PADI2/TRAPPC1/GSDMD/STK10/GPR84/CNN2/ALDOC/LAIR1/PPN/CYSTM  
1/MLF1/IL12RB1/FGFR2/CYP26B1/CD79A/LYAR/OSTM1/PARP1/IL15/PSMD10/PSMD11/PTBP3/LT  
RUNX3/ZMIZ1/LYL1/RBPJ/EPHA2/KITLG/CCL19/NOTCH2/PIK3R6/DOCK10/HAX1/ATP7A/PKNOX1/  
1/HSP90AB1/F2RL1/ARPC2/STAT1/RAB7B/LRRC14/CTLA4/ARPC3/WIPF1/NPLOC4/CD83/PSMB2/S  
LEC7A/TNIP1/EIF2B5/LBP/ARPC1A/BTN2A2/BRK1/HSPD1/PSMD8/ARPC5/ABL1/FCGR2B/PSMA1/T  
UBE2N/CD247/INPP5D/DUSP22/CD3G/PTPRC/NECTIN2/CLEC4E/BAG6/BTN2A1/PIK3CB/MYO1C/PS  
P4/NHP2/NONO/AUNIP/CDK2/KPNB1/DTT1/KDM1A/FANCA/CCT7/NASP/CHRA1/LIG1/PRIM1/EHMT  
10/SPIRE1/CEP164/RPS27A/NBN/MAGEF1/PIAS4/RAD18/ERCC1/UIMC1/COPS5/UBA52/MORF4L2/  
/SUV39H2/ZNF335/TAF12/CHTOP/TAF10/DOT1L/MTA3/TDG/SRPK1/CENPQ/PRKAA2/CHD1L/HDAC1  
GO2/SF3A3/CPSF4/RPL35/RBPMS/APP/NCOR2/POLR2K/DNAJC8/KTI12/DDX54/PABPC4/FUS/ZBTB  
RNP/RPS4X/RPL6/C8orf88/MAGOH/RPL37/RPL27A/RCC1L/COPS5/WARS2/EIF1AD/RPL36/UBA52/  
1/F2RL1/PRSS3/DYNLL1/DYNC1H1/ILF2/AMPD3/NPC2/NBEAL2/OLR1/SLC2A5/GPI/PA2G4/SERP1  
/TRPM4/CCRL2/MAPK7/SEMA4F/RPS19/STX4/SEMA5B/ANGPT2/SCN1B/SEMA3C/GPR183/SEMA3E/L  
SFPQ/THOC5/IFI16/PML/COPS7B/ISY1/PARP1/UBA1/PSMD10/RNF113A/CRIP1/DONSON/TIPIN/C  
/KIFC3/VBP1/KIF15/STMN3/RASSF1/SFPQ/POC1A/AP3M2/CHMP3/GSK3A/HAUS8/DYNC1LI1/TUBB  
C1LI1/PRCC/PLK4/ANAPC11/UBE2D1/PSMD10/PSMD11/RAE1/CDKN2C/PSMD1/DONSON/TIPIN/ODF  
PN1/SIX2/SHC1/HDAC2/CDK2/KIF14/HCLSL1/KDM1A/CD209/LYN/ITGB1BP1/CARD11/TNC/ITGA2/  
POLR2E/CCAR1/KHSRP/MFAP1/PRPF4/THOC1/GTF2F1/DHX38/DBR1/GEMIN2/PABPN1/SRSF1/SRSF  
ET4/FBXO6/PKD1/STUB1/ANAPC4/BAG6/BBS7/FAF2/TMEM67/DDB1/FBXO44/SKP2/PSMB1/WWTR1/  
EHMT2/RAB11FIP4/CDKN1C/PSMB4/IL1B/CDK5/CHORDC1/PSMB8/PSMB10/PSMA5/SFPQ/POC1A/PT  
DC42EP2/GZMB/DNM1L/RAD21/PDCD5/KATNB1/PIP4K2C/GMFG/WRAP73/ABI2/RALB/MSX1/WDR1/C  
1/CLEC7A/RACK1/MSX1/STPG1/DAP/RAD9A/IL20RA/HCAR2/PLEKHN1/EIF2B5/MYBBP1A/RNF122/  
LCK/XPR1/CHMP3/NUP85/IFI16/BANF1/DENR/AP2M1/NUP43/PML/RPL39/DYNC1LI1/COPS7B/VPS  
SF4/RPL35/RPS20/APP/PSMD4/POLR2K/DNAJC8/RPL18A/PSMD3/PABPC4/FUS/PSMD7/CWC27/RPS  
PT7L/ASXL1/USP3/MAP3K7/UCN/PRMT5/PHF1/DPY30/NAA60/IRF4/ING2/USP36/BCOR/SETDB1/M  
3/KRT8/CXCL13/MKKS/NLRC5/HLA-DRB5/CBFB/PSMB4/IL1B/PIAS3/IL2RA/PSMB8/TCP1/TNFSF1  
UBQLN4/VAMP8/WIP1/MRPS17/MRPS21/MRPS15/CCSAP/DCTN1/CAPN2/MRPL18/PLK3/ADAMTS5/M  
/EXOSC10/PAK1IP1/EXOSC7/DDX56/PIH1D1/TARBP2/RBMX/ZRSR2/UTP20/EXOSC1/EIF3E/NOB1/  
/RAP2A/CDK5/PDGFA/CD47/CTTN/MYADM/WAS/VIL1/SPECC1/NUAK2/TNIK/CIT/PFN1/WASF1/ABR  
OTCH1/CEP164/ODF2L/HAUS7/INPL1/VDAC3/MARK4/HAUS5/DEF8/RILPL1/CD2AP/DYNC1I2/RAB  
K/CIT/PFN1/WASF1/ABR/NEB/KPTN/PARG/TACSTD2/CAPZB/FGD6/RALA/GRB2/SMTN/LLGL1/FHO  
PTBP3/LTBR/PSMD1/LOX/MB/SIPA1L3/MSH2/PSMA7/BATF3/PSMB3/CIAPIN1/DNASE2/SBNO2/DRO

/CBFB/ITGA2/IL1B/IL2RA/CD47/SPOCK2/SPOCK1/TNFSF13B/CXCR3/MYADM/PLEKHA2/TGFB2/PL  
P1/DNAJC10/PSMB3/BARD1/UBE2A/BAG3/SMARCC1/ARRB2/USP22/KCTD2/VPS25/ADRA2A/SNX12/  
IEN1/IL1B/MTA2/BCAR1/RAP2A/CDK5/PDGFA/FAM83H/MCAM/FGR/CXCR3/CCL4/MYADM/TGFB2/GP  
P1/MYLIP/ACTB/RAP2A/CDK5/NREP/CTTN/SPOCK1/RNF157/STMN3/PLXND1/PQBP1/GSK3A/NDRG4

A3C/PMP22/PTPRF/SEMA3E/PIFO/MAPT/CHN1/BRK1/CDHR2/AKIRIN1/CBFA2T2/ABL1/STK24/FCG5/KLHL17/PCGF2/DNM1L/TRPM4/PSMD3/RBX1/PSMD7/UFC1/PELI1/MTBP/CBL/RPL23/RNF4/UBE2/GPSM2/FERMT1/NPEPPS/SRI/ADAM8/LEPROTL1/RANGRF/YWHAH/GIPR/MCU/FRMD8/HCLS1/BBC3/KPTN/YWHAQ/ARF4/RUVBL2/YWHAB/RPS3/CROCC/RPL27/BARD1/BAG3/SSR3/MCM8/NUP155/CALR/IN1/PSTPIP1/NLE1/SRSF9/NASP/SNRPC/GEMIN7/RPL10L/ARPC5L/ATXN2L/FKBP4/ADRM1/RAC1/RPS20/APP/NUP107/PNP/PSMD4/HK1/RPL18A/PSMD3/PABPC4/PSMD7/RPS19/NT5C3B/RPLP0/RPL/INTS9/PIH1D1/GTF2E2/SEPHS1/TRMT12/TARBP2/TP53RK/INTS7/POLR2I/UTP20/POLR2J/EXOS15/ABR/ATP6VOC/PSMD11/PSMD1/C5AR1/TMEM63A/PADI2/TRAPPC1/GSDMD/STK10/GPR84/CNN2/TRIM31/DAPK3/PIK3CD/CXCL13/MKKS/ARHGDIB/KIF14/DEFB1/JAG1/MITF/LYN/ITGB1BP1/CCEMIP/ACVR1/CXCL17/AKIRIN1/ABL1/PDCD10/TRIP6/TRADD/ACVR1B/PTK2/THBS1/ADAM17/VPS3/NKAP/STOML2/SRF/RHOA/GLMN/AP3B1/DOCK2/TNFRSF14/IDO1/RUNX3/ZMIZ1/CCL19/XCL1/PIK315/ABR/ATP6VOC/PSMD11/PSMD1/C5AR1/TMEM63A/PADI2/TRAPPC1/GSDMD/STK10/GPR84/CNN2/TRPM4/CCRL2/MAPK7/SEMA4F/RPS19/STX4/SEMA5B/ANGPT2/SCN1B/SEMA3C/GPR183/SEMA3E/LPS12/JMJD4/SARNP/RPS4X/RPL6/C8orf88/MAGOH/RPL37/RPL27A/RCC1L/COPS5/WARS2/EIF1AD/EIF2B5/MYBBP1A/RNF122/CLIP3/TFAP2A/MAPT/PDCD6/CYCS/FGD1/OBSCN/CCL3/CDK19/MTCH1/57/TAF9/VIL1/CD27/PTRH2/MAZ/PTGFR/NUAK2/SOCS3/FGFR2/SET/THOC6/PSMD10/NES/C5AR1/EIF2B5/MYBBP1A/RNF122/CLIP3/TFAP2A/MAPT/PDCD6/CYCS/FGD1/OBSCN/CCL3/CDK19/MTCH1/N/RNF157/TAF9/VIL1/CD27/PTRH2/MAZ/PTGFR/NUAK2/SOCS3/FGFR2/SET/THOC6/PSMD10/NES/PSMA3/PARK7/BUB3/RNF144A/NUB1/UBQLN2/RNF121/WWP2/ARIH2/RNF126/TLK2/ANAPC15/PSM4/RAC1/CBFB/MIEN1/GBA/JCHAIN/CD47/CTTN/MYADM/DNAJB2/WAS/CDH17/TRMT112/VIL1/PSMCH3GLB1/ERCC1/VEGFA/MARK4/DEF8/PIH1D1/MECP2/CENPJ/PPP2R5B/CDK5R1/PSMC3/PPM1F/TWI/RPL7/RPL28/RTN3/PSMB10/CCL4/LCK/THOC5/XPR1/CHMP3/NUP85/IFI16/BANF1/DENR/AP2M1/OBEC3G/RPS21/PSMB8/TCP1/RPL7/RPL28/RTN3/PSMB10/CCL4/LCK/THOC5/XPR1/CHMP3/NUP85/TGFR/CYP26B1/BYSL/FOLR2/AGFG1/OSBP2/MST1R/PPP1R1B/OXTR/SPESP1/VDR/SBF1/ODF2/MSHHAUS8/PML/DYNC1LI1/CIT/PLK4/ANAPC11/UBE2D1/PSMD10/PSMD11/NES/CDKN2C/PSMD1/DONSO/PA2G4/SERPINB1/PIP5K1C/PPIA/RAB24/ACLY/DYNLT1/GTPBP2/CD68/NCKAP1L/ADAM8/CAPN1/DAPK3/PIK3CD/NLRC5/PLSCR1/PSTPIP1/DEFB1/SLC11A1/CD209/RAB20/LYN/HLA-DRB5/CARD1C5/UBE2N/EREG/FAM3A/TLR7/HSP90B1/PIK3R6/IRAK2/SERPINB9/CAV1/DAB2IP/NECTIN2/YTHD/IL1B/EHD2/IL2RA/ADRA2C/RNF157/MAPK11/MYADM/LOXL2/TGFB2/PLXND1/CD27/ADAMTS9/PPP/PSMD4/PCGF2/MED25/PSMD3/RBX1/PPP1R15A/PSMD7/RAD21/BABAM1/MTBP/RPL23/NME6/RFWD3/AR1/CDK7/LRP8/CCND2/RPS3/TFAP4/STK10/MTCP1/TGFB3/MUC20/VPS25/APP/ADRA2A/XRCC6/SMH2/RPS3/SIT1/GRB2/CD6/DROSHA/CDC42/KAT2A/IL4R/PNP/GAL/SWAP70/HELLS/SKAP2/CD8A/FBXW5/HNRNPU/SYCE1L/CCNE2/MASTL

9A/LYAR/OSTM1/PARP1/IL15/PSMD10/PSMD11/PTBP3/LTBR/PSMD1/LOX/MB/SIPA1L3/MSH2/PSM/NF2/COL11A1/OVOL2/PSMD8/ACVR1/LUZP1/RARG/TNNI3/ABL1/VCL/PSMA1/SFRP2/KDF1/RPS7/HSPD1/ABL1/SART1/HLA-DOA/FCGR2B/TNFAIP3/TOX/CSK/VAMP8/MILR1/BAD/BCL10/VCAM1/TWS

KAT2A/ZNF207/MTF2/SEMA4D/DNAJB6/SWAP70/DNM1L/SEMA4F/RAD21/KATNB1/GMFG/MTBP/SEMA/RANGRF/DAPK3/PIK3CD/CXCL13/MKKS/ARHGDIB/KIF14/DEFB1/JAG1/MITF/LYN/ITGB1BP1/CCL2IP/ACVR1/CXCL17/AKIRIN1/ABL1/PDCD10/TRIP6/TRADD/ACVR1B/PTK2/THBS1/ADAM17/NOTCH1IC/DUSP4/DBNDD2/IL1B/GBA/ACTB/CDK5/CHORDC1/PDGFA/TXN/MLKL/UBE2L3/TCP1/ADRA2C/FG1/LLGL1/ARHGAP18/DNAL4/RANBP1/AHSA1/SEMA4D/XCL2/AGAP1/APP/DNAJB6/CDC42EP2/MY09B1/SWAP70/CDC42EP2/AFAP1/KATNB1/GMFG/RNF4/ABI2/ARHGDIA/WDR1/CEP250/SEMA3E/CLIP3/DNM1L/ACTL8/AP3D1/TRAPPC3/KATNB1/IKBKG/BTK/STX4/CBL/STK25/MY05A/RALB/CSPG5/COPAB3A/RAB11A/KIF22/PARD3/CACNA1D/AP3B1/STXBP1/ACTN4/GOSR2/RAB27B/FNBP1L/SNPH/ADOTR/NSMF/GORAB/LRP8/SRRT/FAIM/DGUOK/CST7/SEMA4B/CALR/PRKCI/PRRX1/ZMYND8/SEMA4D/S

AP1L2/TNIK/TUBB2B/DVL2/INPP5J/NSMF/LRP8/TACSTD2/SRRT/FAIM/DGUOK/SEMA4B/CDC42/CAPMAIP1/CCT7/LYN/ITGB1BP1/REEP2/MCTP1/RAC1/AKAP8L/IL1B/EHD2/ACTB/CDK5/TXN/UBE2L3/HDAC2/ATF4/HTATIP2/KIF14/HCLS1/CLN3/NLE1/KDM1A/MITF/BIRC7/MIEN1/IL1B/GBA/LAMTO4GALT/SPESP1/EPS15L1/YWHAQ/TMEM43/YWHAB/TRAPPC1/RALA/STX18/GRB2/ARRB2/NUP155/CD

UBE2E1/WSB2/FBXL6/RPS3/USP1/TRAF3/PSMB3/BARD1/UBE2A/ASB1/ARRB2/NUP155/USP22/JAD  
CHMP1A/VPS25/FHDC1/PPAN/OCRL/CETN2/LRRC61/RPS19/PIP4K2C/RPLP0/RRP7BP/WRAP73/TME  
PALM/STX7/CSK/RPL7A/RPS23/RPS10/VAMP8/BAD/HSP90AA1/RPS15/SGTA/RPS16/SYS1/VPS35/  
3K6/BABAM1/STK25/AKT1S1/DNAJC7/RACK1/RFWD3/ZNF675/IGBP1/MSX1/RAD9A/OGG1/RPA2/LE  
/AGFG1/TUBG2/LOX/NEB/KIF2A/GPX1/KPTN/TACSTD2/RPS3/CAPZB/LUM/GRB2/FHOD1/CDC42/ZN  
D11/RAC1/CBFB/IL1B/ACTB/IL2RA/CD47/GLDN/KIFC3/TNFSF13B/FIBP/MYADM/TGFB2/CDH17/A  
L1/VDAC3/MARK4/HAUS5/DEF8/RILPL1/CD2AP/DYNC1I2/RAB11A/NEDD1/CENPJ/TMEM138/SRF/C  
EMA3E/MAPT/CHN1/BRK1/CDHR2/AKIRIN1/CBFA2T2/ABL1/STK24/FCGR2B/STMN2/RASAL1/SFRP2  
/CKAP5/DBF4B/BTN2A2/RAD51C/BTG2/PSMD8/PIDD1/HSPA2/SUSD2/PK1A/PSMA1/MTA3/CHEK2/C  
A/SGO1/SFI1/CTDSPL/MSTO1/LMNA/DYNLL1/DYNC1H1/SPDL1/XRCC3/TICRR/TGFA/RRS1/KNTC1/  
/METTL3/LOXL3/PSMB1/ACIN1/MOV10/NFKBID/PSMB6/CLPTM1/SH3RF1/DPY30/PSMA3/ANKRD54/  
ASP8/PTPN1/TMEM98/PLK3/BICD1/SH3GLB1/NVL/MAP1A/MAVS/BNIP3L/CCNE2/MARK4/SREBF1/T  
DEFB1/JAG1/MITF/LYN/ITGB1BP1/CCL28/MCTP1/RAC1/ITGA2/PLA2G7/MIEN1/IL1B/MTA2/BCAR  
DCD10/TRIP6/TRADD/ACVR1B/PTK2/THBS1/ADAM17/NOTCH1/STAT5A/VEGFA/HSPA5/ANXA3/RAB1  
/PRMT5/SNRNP200/RBM22/DDX20/GEMIN8/U2SURP/HNRNPC/POLR2B/BUD13/GEMIN6/SYNCRIP/SM  
P200/RBM22/DDX20/GEMIN8/U2SURP/HNRNPC/POLR2B/BUD13/GEMIN6/SYNCRIP/SMN2/HNRNPA2B  
P200/RBM22/DDX20/GEMIN8/U2SURP/HNRNPC/POLR2B/BUD13/GEMIN6/SYNCRIP/SMN2/HNRNPA2B

/DYNC1LI1/GALNS/DSN1/SLC44A2/IMPDH2/ABR/ATP6VOC/PSMD11/PSMD1/C5AR1/TMEM63A/PADI  
1/BAD/BCL10/VCAM1/TWSG1/C12orf4/PTPN2/THBS1/CD177/IL20RB/PAK2/HLA-F/RHBDD3/NKAP  
TK/PELI1/CLEC7A/TNIP1/EIF2B5/LBP/ARPC1A/BTN2A2/BRK1/HSPD1/PSMD8/ARPC5/ABL1/FCGR  
SEN15/RBM24/CDK11A/SSU72/SF3B2/STRAP/LSM1/SFSWAP/POLR2E/SAFB2/CCAR1/KHSRP/MFAP1  
12A/HNRNPA2B1/SUPT6H/U2AF1L4/PIK3R2/SRSF3/APPL2/NOLC1/PTPN14/NUP214/TSC1/HDAC3/

/BRK1/RAB3D/RHOT2/ABL1/RASAL1/SIPA1/ARAP1/RUFY1/RAB5C/SGSM3/DBNL/ARHGAP11A/ARHG  
PU/JMJD4/SARNP/RPS4X/C8orf88/TSN/EXOSC9/MAGOH/DXO/RCC1L/EXOSC7/TBRG4/UBA52/NANO

IP/PREX1/EPHB2/CIB1/ARHGAP33/YTHDF1/ADNP/CNR1/RYK/PLXNB2/FSTL4/MOV10/PPP1R9A/LP

#### AM17

25/MRPS2/ZMPSTE24/CARMIL2/SLN/SUPT16H/MRPL21/TSG101/SMCR8/MRPS26/DVL1/MRPS11/MC  
/ZMPSTE24/XRCC5/SETD1A/TP53/IWS1/PSMG2/PARN/SETMAR/SLX4/ARRB1/TPR/RNF40/OGT/ZBT  
/SRF/RHOA/RPL13A/VPS11/STXBP1/GTF2H1/MTPN/NIN/SPTAN1/PSMC5/FAF1/RPA1/ARF1/RHOB  
DYNC1LI1/GALNS/DSN1/SLC44A2/IMPDH2/ABR/ATP6VOC/PSMD11/PSMD1/C5AR1/TMEM63A/PADI2  
/TMEM63A/PADI2/TRAPPC1/GSDMD/STK10/GPR84/CNN2/ALDOC/LAIR1/PNP/CYSTM1/XRCC6/PSMD  
C11/UBE2D1/PSMD10/PSMD11/NES/CDKN2C/PSMD1/DONSON/ODF2/CDK7/PSMA7/UBE2E1/CCND2/P  
PC4/SRPK2/PAF1/ZNF16

2/IP07/PPP1R12A/HNRNPA2B1/SUPT6H/U2AF1L4/PIK3R2/SRSF3/APPL2/NOLC1/PTPN14/NUP214  
/TGFB2/CHMP3/PPP1CC/NUP43/HAUS8/RAB10/DYNC1LI1/NAP1L2/DSN1/FGFR2/CIT/ANAPC11/MA  
R1B/TPD52L1/DAXX/RHOA/STK3/RAPGEF1/YWHAG/CNPPD1/ATP2B4/PRKAG1/PIK3R5/MAP3K1/GPS  
TG1IP/PDCD6/WNT4/DAP3/PELI3/GRINA/ACVR1/TRAF7/PIDD1/FASTK/RHOT2/SLC25A5/ABL1/ST

LAVL1/FASTKD1/SRSF3/PNPT1/SERBP1/NUP214/TRA2B/TNFSF13/PAIP1/SAFB/IWS1/TARDBP/C1

#### TEX11/RHOA/NEK6

D/DUSP22/CD3G/PTPRC/NECTIN2/CLEC4E/BAG6/BTN2A1/PIK3CB/MYO1C/PSMB1/NCKAP1/PLCG1/  
/RPL37A/RPLP1/DHX9/EDC4/RPL32/TNP01/RPL30/PSMC5/CNOT10/RBM10/MEX3D/RBM24/CNOT3/  
RP/RPS14/RPS27/EXOSC2/ZC3HAV1/RPL29/LARP1/YTHDF2/CASC3/RPL13/RBM8A/METTL3/MAGOH

HNRNPC/BCOR/AURKAIP1/TCHP/DMTN/PRMT6/CEP97/PAM16/HTRA2/ASF1A/ANAPC15/TERF1/FZD9

EXOSC2/CDK5RAP1/DDX52/METTTL3/TEX10/RPS6/RPF1/MRM2/CHD7/RIOK1/ADAR/RTCB/RPL11/RP

IFITM2/NFKBIL1/DDB1/P4HB/CD180/MX1/TRIM32/VAPA/TBC1D20/ADAR/TRIM27/SYT11/PRF1/I

G7/UCN/CCDC88A/HNRNPD/PRMT5/DCP2/HNRNPC/SETDB1/MYC/SLFN11/MBD2/HUS1/FIGNL1/EYA3  
3R6/CD5/CAV1/TP53BP1/ATAD5/THOC1/INPP5D/DUSP22/ZNF683/PTPRC/IKZF3/METTTL3/LOXL3/  
AP/NPHP4/POLE2/LDB1/ATR/DCLRE1C/INPP5D

/TM9SF4/ATP1B1/PPARG/P4HB/PSMB1/PIN1

4/RPL41/RPL9/RPS6/RPL24/RPL11/RPL10/RPS24/TIMM9/RPS3A/TIMM22/ZDHHC20/NMT1/VAMP3  
2/PSMD8/PIDD1/HSPA2/PKIA/PSMA1/MTA3/CHEK2/CLSPN/CEP41/CCND3/PSMB5/PSMA4/HSP90AA  
/CCAR2/BECN1/GCLM/TFDP1/PRKRA/PDIA3/HTT/CAV1/TMEM102/DAB2IP/ATAD5/CSNK2A2/PTPRC

ATR3/USP36/MRPL20/URB2/RPL14/DDX51/RPL10A/ZNHIT3/ZNF622/RPL12/MRPS2/RRP15/WDR3/

BKB/RAB6A/FGL2/LILRB2/FCGR1B

PN/SHQ1/SMN1/ABT1/CNOT1/EIF3J/CRNKL1/SF1/USP4/SF3A1/CLP1/NUDT21/EIF2A/EIF2S1/GE

MRPL22/PRMT7/PSIP1/AAR2/XAB2/TDRD5/PTBP2/SNUPN/SHQ1/SMN1/ABT1/CNOT1/EIF3J/CRNKL













TB2/RAB9A/RAB40C/RAB13/DAB2IP/ARHGEF17/PREX1/EPHB2/ARFGEF1/CNKSR1/CYTH3/RAB1A/PHF1/DPY30/NAA60/IRF4/ING2/USP36/BCOR/SETDB1/PRMT6/BRD7/EYA3/BRD4/NSD1/DYDC2/SKXCL1/RANBP3/CCL3L3/DOCK10/CCL8/CAV2/DAB2IP/PREX1/ARHGAP22/ARHGAP27/ARFGEF1/RIC8L2/MST1R/PPP1R1B/PSMD10/GCN1/SMYD3/CDKN2C/C5AR1/CDK7/LRP8/CCND2/RPS3/TFAP4/DUSP5B/STK25/ABI2/ARHGDIA/VIM/SCN1B/WDR1/SEMA3C/GPR183/PMP22/PTPRF/SEMA3E/MAPT/TGIF

KAP1L/SMPDL3B/ADAM8/HLA-DQA2/MYO1G/NONO/ULBP2/SHC1/PIK3CD/CXCL13/NLRC5/PLSCR1/S3/CALM2/PDCD10/CSK/CLSPN/MAPKAPK3/CCND3/BAD/DBNL/BCL10/ERP29/HSP90AA1/TNFSF15/L

/POLR3F/CTSL/CTSB/RELA/AIM2/PSMB7/SKP1/HLA-E/NOD1/TRIM15/NLRC4/BPIFB1/PTPRS/CLESMAD2/DERL1/ERCC2/ZMPSTE24/ACE/PPP2CA/SLN/SMAD3/USP33/MAU2

LSM14A/TRIM44/AIMP1/PCBP2



P2/RNF213/SULF2/UBR5/PORCN/PSMC3/RHOA/STK3/GSKIP/RAPGEF1/IFT20/CLTC/AP2B1/PSMC5  
45/UBA52/CD2AP/EDEM2/TRPC4AP/PCYOX1L/RNF213/PSMC3/VPS37B/USP11/UBE2D2/CHFR/AGAP  
/LONP1/PRPF19/UBXN1/PSMD8/KLHL42/VCP/PSMA1/TNFAIP3/USP5/NSFL1C/UBQLN4/RPS7/DENN  
1/NDUFA8/BHLHA15/GCLM/TFDP1/MFN1/ATG7/HTT/CAV2/HAX1/UQCRB/ATP7A/TMEM102/NDUFAF6

RPL48/DAP3/BTG2/MRPS7/LARP4B/NAT10/EEF1A2/MRPL53/MPV17L2/GSPT2/RPS7/FARSA/RPL7A  
G1IP/RNF122/DCAF15/PDCD6/MED12/LRRC41/PRPF19/UBXN1/PELI3/PSMD8/TRAF7/ABL1/KLHL4  
PCYOX1L/RNF213/PSMC3/VPS37B/USP11/UBE2D2/CHFR/AGAP3/GLMN/RNF8/ANKZF1/TMUB1/PSMC  
PSMA4/SGTA/PSMD9/RCN3/PTK2/UBL7/CSNK2A1/CASP8/RPL5/RPS27A/CAPN2/FBXW5/USP21/PLK  
1/ATP6AP2/RNF213/SULF2/UBR5/PORCN/PSMC3/RHOA/STK3/GSKIP/RAPGEF1/IFT20/CLTC/AP2B  
LT/CHST2/RAE1/PRTFDC1/STT3A/COASY/GALNT6/PIGC/ACSL3/LUM/FUT2/NANS/FUT6/NUP155/A  
HDAC2/PIK3CD/SLC35B2/GIPR/HCLS1/AXIN1/BBC3/PMAIP1/LYN/WNT7B/ITGB1BP1/BIRC7/CARD

/TBC1D20/ATP8B3/DYM/PRMT5/NOX1/SYT11/TMCC1/SURF4/RAB22A/ANXA8L1/VPS33B/MAPK15/T

PSMC3/UBE2D2/RBM14/MAP3K1/IL17RA/LGMN/DHX9/IDO1/PSMC5/ADORA2B/UBE2N/EREG/KPNA6/  
2/HYLS1/ATP6V1D/HAUS3/KIF24/GAS8/DZIP1L/IFT81/PCNT/CEP78/EHD3/SPATA6/ATXN10/CFA

/DSC2/TRIM27/CAPZA2/RHOH/PDE4B/KCNE3

NTROB/CEP135/TMEM80/RILPL2/HYLS1/ATP6V1D/HAUS3/KIF24/GAS8/DZIP1L/IFT81/PCNT/CEP

/VPS37B/USP11/UBE2D2/CHFR/AGAP3/GLMN/RNF8/ANKZF1/TMUB1/PSMC5/FAF1/ARRDC1/CCAR2/  
WIL4/HSPB11/PLCD4/RAD51C/PAFAH1B2/ACVR1/HSPA2/ADAM28/HVCN1/SRPK1/BAD/DNM2/SPIRE  
DRBS1/HPGDS/TTC26/WNT4/SOHLH2/PIWIL4/HSPB11/RAD51C/PAFAH1B2/ACVR1/HSPA2/GHRHR/A  
TC26/WNT4/SOHLH2/PIWIL4/HSPB11/RAD51C/PAFAH1B2/ACVR1/HSPA2/GHRHR/ADAM28/SRPK1/B  
6/KIF5B/ADGRE2/DMTN/HYAL2/HTRA2/IFNG/ARIH2/TRIM46/MAPK15/VAMP1/PPP1R12A/SUPT6H/



IL17RA/ANP32B/TNFRSF14/DHX9



NC5CL/IL1B/RAP2A/CDK5/PDGFA/LAMTOR1/TXN/MLKL/ADRA2C/PHB/FGR/LCP2/CCL4/MAPK11/TG  
D2/PCGF1/RBM15/SMCHD1



PTPRE/GRB2/COL4A2/POLR2L/CDC42/MUC20/VPS25/APP/ADRA2A/POLR2K/SPRY4/CD8A/AXL/DST  
/ATP2B4/PRKAG1/ZMIZ1/SPATA24/DEDD/TBP/EREG/MORN2/CDYL/SPATA2/RNF114/DZIP1/CIB1/  
L1/SFRP2/TNFAIP3/RPS7/CALM2/CSK/BAG2/LEMD2/BOD1/PRKAA2/PRKRIP1/PTPN2/STYXL1/PTP

TXN/MLKL/ADRA2C/PHB/LCP2/CCL4/MAPK11/TGFB2/CD27/CALCA/MAP3K14/NDRG4/CCR1/SOCS3/  
1/PIK3R5/MAP3K1/MINK1/RPLP1/MAPKAPK5/ADCY6/ADORA2B/UBE2N/ADCY5/KITLG/EREG/CCL19

EF1

L/DBNL/PLXNC1/HSP90AA1/SRGAP2/DNM2/PTK2/NOTCH1/MAP1A/LLPH/VEGFA/RAB3A/LZTS1/PAC  
EGFA/LZTS1/HSPA5/DDX56/RAB11A/RAB29/IFRD1/PACSIN1/NOTCH3/PPP2R5B/CDK5R1/METRN/A  
AP2/DNM2/PTK2/NOTCH1/MAP1A/LLPH/VEGFA/RAB3A/LZTS1/PACSIN2/FBXO45/RAB11A/TUBB3/K  
/NFAM1/TNFSF13B/PSMB10/PHB/FGR/LCP2/PSMA5/CD300LF/NRAS/WAS/TGFB2/SFPQ/PQBP1/LCK  
SN2/ELAVL1/RPS6KA3/NOLC1/TSC1/PAIP1/RPL22/GEMIN5/EIF3C/DDX1/EIF1/ATXN2/C1QBP/TR

TLR8/MX1/ABCF3/ADAR/PLA2G6/PLA2G2A/SYT11/PRF1/IRF4/POLR3F/IL10RB/SLFN11/CD4/APO  
AL2/TRIM46/SEMA6B/EIF4G1/SESN2/BLZF1/SEMA4C/RGS4/ADNP2/PTPRS/PRSS2/RPS6KA3/MUL1

2/MSR1/SYNGR3/CLN3/PSTPIP1/SLC11A1/HSPH1/CD209/RAB20/LYN/APOBR/MCTP1/RAC1/ITGA2  
PN  
DUSP7/MAP3K10/PIH1D1/DGKQ/CDK5R1/PRKAR1B/TPD52L1/DAXX/RHOA/STK3/RAPGEF1/ATG13/A



P2/CLTB/AP2M1/CXCL16/WASF1/VPS28/FOLR2/LYAR/AP2S1/IL15/SIGLEC1/ABR/EPS15L1/LRP8  
/CASP3/UNK/LRPPRC/POLDIP3/ENC1/RPL10/KLHL25/HNRNPD/PLA2G6/LSM14B/NEURL1/EIF4E2/

3KBP1/CNOT9/ATP6V1H/CDKN2B/SHC1/LYN/RAC1/CDKN1C/ATP6V1E1/IL1B/ACTB/BCAR1/PDGFA/  
NOTCH1/MAP1A/LLPH/VEGFA/RAB3A/LZTS1/FBX045/RAB11A/TUBB3/KIF20B/IFRD1/PACSLN1/CD

XL/SEMA5B/STK25/ABI2/ARHGDIA/SCN1B/CSPG5/WDR1/SEMA3C/SEMA3E/MAPT/RERE/CHN1/LIMS  
4/NUP214/MUL1/SETD1A/SUPT3H/BAZ1A/IWS1/BCL11A/PHF20/KAT5/SUZ12/MSL3/SETMAR/MEN1

/MAPK11/PQBP1/VIL1/XPR1/ADAMTS9/IFI16/BANF1/CASP1/MAP3K14/PTGFR/PML/RPL39/IL12R  
XO45/RAB11A/TUBB3/KIF20B/IFRD1/PACSN1/CDK5R1/METRN/PARD3/APBB1/SRF/CAPRIN1/RHO  
/MAPK11/PQBP1/VIL1/XPR1/ADAMTS9/IFI16/BANF1/CASP1/MAP3K14/PTGFR/PML/RPL39/IL12R  
PL6/BNIP3L/RPL37/RPL27A/GNPTAB/SREBF1/HSPA5/RPL36/UBA52/PIH1D1/RAB11A/HIKESHI/Z

/TIGAR/BECN1/SNAPIN/WDR6/VPS33A/EIF4G2/MFN1/ATG7/HTT/HAX1/CD84/RPTOR/ATP6V1B2/C  
RNF26/TMEM229B/FGR/CCL4/MAPK11/PQBP1/VIL1/XPR1/ADAMTS9/IFI16/BANF1/CASP1/MAP3K1  
RS6/HACD1/MCTS1/PIWIL4/MRPL48/DAP3/BTG2/MRPS7/LARP4B/NAT10/EEF1A2/MRPL53/MPV17L  
/TIGAR/BECN1/SNAPIN/WDR6/VPS33A/EIF4G2/MFN1/ATG7/HTT/HAX1/CD84/RPTOR/ATP6V1B2/C

PRC/NECTIN2/CD1A/LOXL3/TNFRSF1B/ADCY7/TLR8/MAP3K7/NFKBID/TRIM27/PRF1/IRF4/HLA-C

/CNP/NCAM1/TRIM32/RPL24/CASP3/ETV1/SEMA3F/MEGF8/EGR2/ULK1/CELSR3/TRIM46/XK/SEMA

/TRPM4/CTSD/CARD16/UQCC2/PDCD5/STX4/RACK1/KRT20/CLEC5A/HCAR2/CCT8/SERGEF/MAPT/A  
/SVIP/MCL1/ABL2/ATP6V1D/CLEC16A/RNF41/TICAM1

MAP3K14/NDRG4/CCR1/TNIF2/FGFR2/DVL2/MST1R/OXTR/PSMD10/PSMD11/LTBR/PSMD1/C5AR1/PS  
CDC42/MUC20/CMKLR1/TLR5/PSMD4/XRCC6/GPATCH3/PSMD3/PSMD7/LILRB4/IKBKG/FADD/BTK/P  
SPTAN1/ADCY6/ADM/ADORA2B/IST1/GCLM/ARF1/RHOB2B2/GMFB/EDNRA/HAX1/CAV1/ATP7A/RPTO  
H1/RPS27A/SFRP4/GRIN2D/PIAS4/BCL9L/GABRB3/TLR2/CSNK2B/TMEM64/UBA52/GLI1/AP2A2/C

7RB/SLC9A6/EXOSC2/CTDP1/IP6K2/ADNP/NAIF1/EAF2/PPARG/RYK/PIN1/FSTL4/MEX3C/UCN/TR

1/IKBKB/LILRB2/PPM1N/DUSP26/PPP1R11/PPP1R3D/GNAI2/ACP1/DAPP1/PPP3CB/PPP1R36



MAP3K14/NDRG4/CCR1/TNFK/FGFR2/DVL2/MST1R/OXTR/PSMD10/PSMD11/LTBR/PSMD1/C5AR1/PS





C/PTPRS/DOCK7/TRAK2/PLXNB3/SHTN1/LAMA1/USP33/TTL/NEFH/FEZ1/DPYSL2/NEFL/DAG1/DVL

APPC2/CHMP2B/AP1M1/CHMP2A/STX5/VAPB/GORASP1/CHMP7/VPS37A/STX2/BLOC1S1/STX11/CHM



RLIM/XIAP/FBXW11/UBE3C/FBXO27/PLAA/RNF168/PSMD5/UBC/FBXL15/UBE2W

IGNL1/NPHP1/EYA3/HYAL2/ANXA1/RELA/TLK2/FKBPL/CLK2/CTNS  
P85/IFI16/PSMC4/GSK3A/NUP43/OSBPL7/PML/DRAM2/VPS28/SET/ATP6VOC/USP14/PSMD10/PSM

/GPX1/PSMA7/EXOSC5/YWHAB/SAMD4B/PSMB3/DFFA/BAG3/SMARCC1/NUP155/AGO2/APP/ADRA2A/



BP8/NBN/CAPN2/MTHFR/GJB3/HOXA5/VEGFA/BCL2L1/PHGDH/ZPR1/MESP1/ATP6AP2/PHF6/SLC39

B/DNM2/PTK2/ADAM17/CSNK2A1/NOTCH1/CCDC85B/STAT5A/NPPB/ARHGEF11/VEGFA/EXOSC9/PAK  
P2B4/GPS1/MAPKAPK5/HEG1/CCAR2/EPHA2/MECOM/CDC34/MRAP2/CLIC2/DUSP18/CAV1/DAB2IP/

FUT8/MBD3/FKBP8/NBN/CAPN2/MTHFR/GJB3/HOXA5/VEGFA/BCL2L1/PHGDH/ZPR1/MESP1/ATP6AP

/LLGL1/CDC42/PRKCI/TPST1/CHPF/APP/SLC9A7/DNM1L/AP1G2/AP3D1/TRAPPC3/SLC35C1/AP1B  
S/POLR3D/PRPF19/ESCO2/NAT10/RARG/DNA2/HSPA2/RAD51D/MTA3/DCLRE1B/EME2/GAR1/RAD1/  
B/GBA/GNB2/LAMTOR5/CTSS/LAMTOR1/TMEM9/GNS/S100A13/FTL/NFAM1/GNB1/KXD1/AP2M1/WDR  
X3/DMAP1/CCAR2/TBP/IST1/UXT/IPO4/SUV39H1/MSH6/SAP130/PELP1/MORF4L1/EP400/LDB1/S  
C3/ERCC6L/RFC2/DDX11/E2F4/NCAPG2/NUP37/PPP1CA/PPARD/INCENP/FBL/CBX3/DDX27/DVL3/  
2/DEAF1/POP1/PTPN6/KNOP1/PUM3/IFI16/PPP1CC/MAP3K14/NSUN5/SIRT7/MIDN/PML/FBXW9/M  
B/GBA/GNB2/LAMTOR5/CTSS/LAMTOR1/TMEM9/GNS/S100A13/FTL/NFAM1/GNB1/KXD1/AP2M1/WDR  
P2A1/VPS33A/SEH1L/VASN/TLR7/NAPG/ATP11A/EGF/PI4K2A/DAGLB/RPTOR/ATP6V1B2/AP5B1/L  
RNASE2/LYN/HLA-DRB5/RPN2/SLC26A11/ANXA11/ATP6V1E1/IL1B/GBA/GNB2/CPA2/LAMTOR5/CT  
TXNDC9/PSMB5/HOOK2/BOD1/CSPP1/DNM2/TCTEX1D2/CCSAP/DCTN1/CEP164/ODF2L/HAUS7/KATN  
N23/TMEM63A/CHD4/RUVBL2/CCDC77/CROCC/SMTN/CDC42/KAT2A/CHMP1A/TOPBP1/MZT2B/RANBP  
KLHL21

38/CSPG4/NF2/S100A7/REXO2/LIMS1/ARPC5/TBCD/VCL/ZNF185/RPS7/TRIP6/RPL7A/ACTR3/RP  
IN2/GGA3/TMBIM1/UBA52/HLA-F/AP2A2/VAC14/RAB11A/YIPF2/MITD1/ARL8B/VPS37B/VPS11/A  
/TMEM163/WFS1/LAMTOR1/CD47/SMAGP/KIFC3/NFAM1/NRAS/WAS/SERPINB6/CACNG4/COPZ1/AP3  
DAM17/CAPN2/PDLIM4/MYL9/NEBL/ACTN1/MYO6/LIMA1/CD2AP/NOTCH3/TNNC1/STOML2/WIPF2/D  
TOP/ABL1/SART1/PHF5A/WRAP53/NOP10/DCLRE1B/FAAP20/NFATC4/TDG/CIITA/GAR1/FLYWCH1/  
PDE4B/SURF4/IGF2R/VAMP3/RAB3C/VAMP1/NKD2/ARCN1/HLA-E/CHGA/SEMA4C/CNIH2/PTPRS  
IA/PAM/SNX10/RAB24/ACLY/DYNLT1/GTPBP2/SRI/CD68/NCKAP1L/ADAM8/CAPN1/LAMP3/CPNE1/  
P/KIFC3/NFAM1/NRAS/SERPINB6/CACNG4/COPZ1/AP3M2/NECAP2/AGPAT2/CLTB/AP2M1/RAB10/D  
2/SMC4/KDM1A/NASP/DCTN2/HMGN4/KNSTRN/CHRA1/PRIM1/SSB/EHMT2/BUD31/DCTN5/AKAP8L/  
T7B/B4GALT7/MUC3A/RAC1/GBA/PDGFA/RTN3/NRAS/B4GALT2/XYLT2/PI4KB/COPZ1/FUT3/MUC5B  
/TRAPPC1/BORCS8/GLMP/LUM/STARD3/VPS18/CTSD/AP3D1/AP1B1/CCZ1/ABCC10/M6PR/CSPG5/T  
SCAMP2/CFTR/PDLIM4/LTV1/FIG4/MCOLN3/OPTN/CCZ1B/PACSIN2/GGA3/TMBIM1/UBA52/HLA-F/  
ME2/GAR1/RAD1/SFR1/HAT1/CSNK2A1/USF1/MBD3/NBN/RNF2/ANP32E/SYCE1L/ERCC1/THOC2/RB  
R/INF2/APP/DNAJB6/MYO9B/DNM1L/FUS/GDPD5/BTK/STX4/CBL/RACK1/ZNF675/M6PR/CEP250/T  
3/ABI2/VIM/ITGB8/RPL38/CSPG4/NF2/S100A7/REXO2/LIMS1/ARPC5/TBCD/VCL/ZNF185/RPS7/  
T/CHST2/KIAA0319L/LMTK3/HLA-B/QPCTL/GALNT6/GOLGA3/TRAPPC1/STX18/FUT2/FUT6/ICA1/  
P2A1/VPS33A/SEH1L/VASN/TLR7/NAPG/ATP11A/EGF/PI4K2A/DAGLB/RPTOR/ATP6V1B2/AP5B1/L  
/DYNLT1/COL5A2/HAUS1/ACTG1/SRI/TNNI2/RSPH1/COL6A3/TUBB4A/DAPK3/CSNK1D/KRT8/KIF1  
/DYNLT1/COL5A2/HAUS1/ACTG1/SRI/TNNI2/RSPH1/COL6A3/TUBB4A/DAPK3/CSNK1D/KRT8/KIF1  
CD58/C3AR1/HSP90AB1/PRSS3/DYNLL1/DYNC1H1/ILF2/AMPD3/TMED9/NPC2/NBEAL2/FSTL3/OLR  
/COL5A2/HAUS1/ACTG1/SRI/TNNI2/RSPH1/COL6A3/TUBB4A/DAPK3/CSNK1D/KRT8/KIF14/FHOD3  
3/KIF15/WAS/RASSF1/SPECC1/HAUS8/DYNC1L1/MAP1LC3B/TUBB2B/EVPL/MAP4/TUBG2/NES/KI  
ALR/APOBEC3D/SF3A3/RPL35/TDRKH/RPS20/RBPMS/PPAN/RPL18A/PABPC4/FUS/CWC27/RPS19/R

20B/CENPJ/KIF22/KLHL21/RASSF5/NEK6/CLTC/ENKD1

/LIMA1/RPL19/PIIB/TLN1/RPS11/PROCR/RHOA/RPL13A/YWHAG/CLTC/GAK/ACTN4/RPL37A/FAP/  
1/RPL19/PIIB/TLN1/RPS11/PROCR/RHOA/RPL13A/YWHAG/CLTC/GAK/ACTN4/RPL37A/FAP/RPLP1  
/HSPA5/LIMA1/RPL19/PIIB/TLN1/RPS11/PROCR/RHOA/RPL13A/YWHAG/CLTC/GAK/ACTN4/RPL37

A2/KITLG/KSR1/SSX2IP/MPP2/ARF1/HAX1/LDB1/RAB13/ATP7A/ATP6V1B2/CIB1/DUSP22/CYTH3

52/HLA-F/AP2A2/VAC14/BORCS6/TMEM138/TECPR1/ARL8B/VPS11/AP3B1/CLTC/AP1S1/AP1S3/A  
MRPL58/MRPL38/MRPS30/MRPS27



NQ1/CDK2/SNF8/CLN3/SLC11A1/RAB20/HLA-DRB5/RAB11FIP4/MCTP1/CCDC22/RAC1/TMEM163/A  
F335/TAF12/ACVR1/TRAF7/TAF10/DNA2/KLHL42/VHL/DHDDS/KCTD5/CCND3/SEN3/PRKAA2/ACV

X1/DNAJC1/TAF3/ENY2/NDUFB4/ATRAID/PCYT1A/CASC3/TFPT/MY01C/QSOX2/MX1/VAPA/TMEM38



1/APP/PPFIA3/KLHL17/DNM1L/FUS/SEMA4F/SH3GL1/CPE/AP3D1/RPS19/RPLP0/STX4/RPL23/RA

RK3/ATP6V0A1/CLK2/MBD1/U2AF1L4/E2F7/LUC7L3/SRSF3/SETD1A/MAML1/CLK3/TARDBP/PIP5K

CD5/SPIRE2/KIF3A/PPP1R9A/EFHC1/UTRN



/PMPCA/MRPS6

HL17/TRPM4/CNNM4/PPP5C/FUS/SEMA4F/GDPD5/CPE/KATNB1/RRM1/STX4/ABI2/RACK1/MYO5A/S

P1/MORF4L1/EP400/LDB1/HMGA2/MORC2/GRWD1/GTF2F1/HDAC5/ZNF683/ENY2/SIN3B/PAF1/ADN  
CTN4/NFKBIB/HINFP/DNMT3B/DHX9/MED7/NR1H2/GMEB2/ZMIZ1/DMAP1/CCAR2/TAF13/PMF1/MMS  
NUAK1/CDK20/STK3/NEK6/GAK/PRKAG1/MAP3K1/MINK1/MAPKAPK5/PHKA2/GTF2H1/PHKG2/ADCK5  
PL10/RPL38/MRPL52/RPL23A/EPPK1/OBSCN/EMILIN1/DAP3/COL11A1/SEC13/MRPS7/ARPC5/CCD  
DK5R1/ARHGAP28/ADPRH/AGAP3/DAXX/STK3/ACAP3/STXBP5/RPLP1/DOCK2/SGSM1/ARF1/RANBP3  
OB/CDH11/LIMCH1/MARK2/PDLIM3/CORO1B/AGBL5/ABLIM2/HIP1R/KIFC2/SLC9A3R1/TPPP3/LAS  
/CDK19/ACVR1/FASTK/ABL1/STK24/PIM3/NME7/SRPK1/CSK/CIITA/CHEK2/MAPKAPK3/CCND3/PR  
/KIF14/DCTN2/RAB20/RAC1/ATP6V1E1/GNG5/GNB2/RAP2A/KIFC3/KIF15/GNB1/NRAS/EIF2S3/D  
/KIF14/DCTN2/RAB20/RAC1/ATP6V1E1/GNG5/GNB2/RAP2A/KIFC3/KIF15/GNB1/NRAS/EIF2S3/D  
/KIF14/DCTN2/RAB20/RAC1/ATP6V1E1/GNG5/GNB2/RAP2A/KIFC3/KIF15/GNB1/NRAS/EIF2S3/D  
TP6V1E1/GNG5/GNB2/RAP2A/KIFC3/KIF15/GNB1/NRAS/EIF2S3/DIRAS2/PSMC4/ATAD2/ABCA2/R  
SP12/PRKD2/TRAF3/BARD1/SIT1/GRB2/ARRB2/PARD6B/LLGL1/CDC42/MTCP1/SLC12A7/ADRA2A/  
/RPS19/AP1B1/CBL/ANGPT2/VRK1/RACK1/RAD9A/CEP250/TBL2/TNIP1/PARD6G/PIFO/MAPT/NSF  
1/YWHAQ/ABI3/YWHAB/ACSL3/DFFA/STX18/SIT1/GRB2/ICA1/ARRB2/FHOD1/CDC42/CHMP1A/PRR  
1/GPSM2/NCKAP1L/MLST8/FBXO5/DBF4/COL6A3/ARHGAP1/ATP6V1H/CDKN2B/RTKN/RAP1GAP2/SI  
/CPE/CBL/RACK1/ARFIP2/ITGB8/CCT8/TRIM25/PTPRF/STK38/RPL23A/CKAP5/EMILIN1/ACVR1/  
GSM3/HSP90AA1/ARHGEF3/SRGAP2/ARHGEF25/BICD1/RGP1/TBC1D22B/OPTN/ARHGEF11/RABGGTB

/TRIO/CLK2/MAP3K9/PRKCB/MAP4K4/ERCC2/MAP3K11/RPS6KA3  
2B1/MYO1D/KIF5B/SLFN11/ABCF1/DYNC2LI1/FIGNL1/TNNT2/MYL6/ATP6V0A1  
OCK2/WDR41/TNP01/IPO9/SH3BP5L/EPS8L1/SGSM1/IPO4/RANBP3/YIPF1/EGF/CAV1/ATP7A/ARH  
F1/IFT20/STXBP5/DOCK2/WDR41/TNP01/IPO9/SH3BP5L/EPS8L1/SGSM1/IPO4/RANBP3/YIPF1/E

K10/POLR2L/CHKA/PRKCI/GRK2/PRIM2/POLR2K/HK1/DMPK/IP6K1/POLQ/MAPK7/MAP3K6/AXL/PI

PK3/CCND3/PRKAA2/ACVR1B/STK40/DGKA/PTK2/CSNK2A1/TNK2/CCNJL/AAK1/PLK3/PFKFB2/CCN

/ARL8A/RAB2A/RHOD/RAB7A/TUBD1/NOLC1/RAC3/RRAS2/GEM/RAB6A/GNAS  
/TUBD1/NOLC1/RAC3/RRAS2/GEM/RAB6A/GNAS

D1/NOLC1/RAC3/RRAS2/GEM/RAB6A/GNAS  
1/RAC3/RRAS2/GEM/RAB6A/GNAS

EM/RAB6A/GNAS

1/NOLC1/RAC3/RRAS2/GEM/PDE5A/RAB6A/GNAS  
1/NOLC1/RAC3/RRAS2/GEM/PDE5A/RAB6A/GNAS

HD2/GTF3C5/NBN/HNRNPU/PIAS4/CTBP2/THRA/ERCC1/EXOSC9/CSNK2B/MAP3K10/GTF2E2/MECP2

RPP38/APEX1/PARN/THUMPD3/QTRT2/DDX19A/DUS3L/TARBP1/TRMT10C/MRPL58/METTL16/DDX46





P1R11/RNF214/RNF41/UBE2J1/BFAR/SMURF2/RNF40/ASB2/TRIP12/HLTF/ANAPC1/UBE2K/FANCL

C1/PRDM4/MSX1/CXXC1/EHF/E2F6/DPF2/MYBBP1A/TFAP2A/MAPT/NFYC/MED12/SUV39H2/POU2AF

/CKAP5/MZT1/ABL1/TBCD/VCP/STMN2/NSFL1C/CEP19/CHEK2/IFT172/HOOK2/PRKAA2/SRGAP2/P  
 RCC2/TUBA1A/TUBB2A/SGO1/CKS1B/SFI1/CTDSPL/MSTO1/LMNA/DYNLL1/DYNC1H1/SPDL1/XRCC3  
 10/FGR/MYADM/TGFB2/CDH17/PLXND1/PTPN6/VIL1/RAB10/C12orf57/TNIK/TUBB2B/FGFR2/COC  
 RKD2/TRAF3/ASB1/LUM/ARRB2/CD6/POLR2L/DDX41/KAT2A/IL4R/TGFB3/CMKLR1/APP/ADRA2A/P  
 DRA2A/TLR5/POLR2K/HK1/XRCC6/GPATCH3/TRPM4/CARD16/AXL/FADD/BTK/PELI1/CLEC7A/UBE2  
 AP3K7/UCN/TRIM32/FFAR2/AGPAT1/NOX1/PARK7/IRF4/PDE4B/POLR3F/CD4/HYAL2/IFNG/ANXA1  
 MC3/TWIST1/SRF/CC2D2A/RHOA/STK3/GLMN/IFT20/CLTC/SIX1/PDPN/AP2B1/HBEGF/PSMC5/RBP  
 /NFAM1/FGR/PSMA5/NRAS/CDH17/SERPINB6/PTPN6/PSMD13/AGPAT2/COMMD9/RAB10/DYNC1LI1/  
 MA5/CD300LF/NRAS/SERPINB6/PTPN6/PSMD13/AGPAT2/COMMD9/RAB10/DYNC1LI1/GALNS/DSN1/  
 I2/TRAPPC1/GSDMD/SBNO2/STK10/GPR84/CNN2/IL4R/ALDOC/LAIR1/PPNP/CYSTM1/XRCC6/PSMD3  
 3/CTSD/PSMD7/GMFG/PRDX4/CLEC5A/CCT8/TBC1D10C/FCGR3B/HPSE/RAB4B/S100A7/KCNAB2/GC  
 /NFAM1/FGR/PSMA5/NRAS/CDH17/SERPINB6/PTPN6/PSMD13/AGPAT2/COMMD9/RAB10/DYNC1LI1/  
 1/KDELR1/SLC11A1/RNASE2/JAG1/LYN/RAC1/IL1B/CTSS/LAMTOR1/GNS/CD47/S100A13/FTL/NF  
 1/XRCC6/PSMD3/CTSD/PSMD7/GMFG/PRDX4/WDR1/CLEC5A/CCT8/TBC1D10C/FCGR3B/HPSE/RAB4E  
 BR/PSMD1/LOX/MB/SIPA1L3/MSH2/PSMA7/BATF3/PSMB3/CIAPIN1/DNASE2/SBNO2/DROSHA/CDC4  
 PREX1/DCLRE1C/INPP5D/HDAC5/ZNF683/CD3G/PTPRC/CLEC4E/IKZF3/METTL3/PPARG/JUNB/LOX  
 H2B2/LEF1/GPI/PDCD1/IRF7/ZC3H12A/PSME3/TNIP2/LAG3/SIRPG/FLOT1/ACTG1/NCKAP1L/SMP  
 NFAIP3/KCN4/CSK/ACTR3/MAPKAPK3/PSMB5/BCL10/PSMA4/SPPL3/HSP90AA1/PSMD9/PTK2/PTP  
 MB1/NCKAP1/PLCG1/EIF2B4/MAP3K7/NFKBID/PSMB6/FFAR2/CD22/PLA2G6/ICAM2/PSMA3/PDE4E  
 2/RAC1/SSRP1/MTA2/WDHD1/APOBEC3G/TCP1/PHB/WAS/SWI5/SFPQ/DNMT3A/BANF1/PML/COPS7E  
 KIF22/FANCF/UBR5/PIIE/POLR2I/TWIST1/POLR2J/RBM14/APBB1/ACTR5/RFC5/RNF8/POLR2D/G  
 0/HAT1/MBD3/USP21/MTHFR/HNRNPU/RNF2/ANP32E/VEGFA/HSF4/UIS1/SREBF1/MIS18A/WDR5/  
 80S/CWC27/RPS19/NOC4L/RRP7BP/TSR3/UTP11/LAS1L/SNRPG/TRIM71/UTP4/RBM17/HNRNPM/SL  
 HSPA14/NANOS1/TARBP2/ETF1/RPL19/MRPL37/EIF5A/RPS11/EIF3E/CAPRIN1/RPL22L1/RPUSD3  
 NB1/PIP5K1C/PPIA/RAB24/ACLY/DYNLT1/GTPBP2/CD68/NCKAP1L/SYTL1/ADAM8/CAPN1/MYO1G/  
 BP/CCL3/S100A7/CHN1/CXCL17/AKIRIN1/EXT1/CYP19A1/BIN2/PLXNC1/VCAM1/SLC8B1/PTK2/P  
 DK7/MSH2/RUVBL2/RPS3/TFAP4/POLA1/USP1/BARD1/UBE2A/GRB2/MCM8/POLR2L/CBX5/TOPBP1/  
 2B/PLK4/WASF1/INPP5J/MAP4/IFT80/TUBG2/RAE1/KIF2A/ODF2/RPS3/CROCC/BAG3/PARD6B/PT  
 2/MSH2/PSMA7/UBE2E1/CCND2/TFAP4/PSMB3/USP22/ZNF207/CHMP1A/TOPBP1/RANBP1/APP/PSM  
 IL1B/CAPNS1/IL2RA/KDM5B/PDGFA/CD47/S100A13/RNF187/TNFSF13B/NRAS/TGFB2/VASH2/F3/  
 2/SRPK2/HNRNPUL1/CASC3/SNRNP70/COIL/FIP1L1/RBM4B/DHX8/RBM8A/METTL3/CSTF3/SF3B6/  
 SUMO2/PSMB6/RPL11/ENC1/CDC23/PSMA3/PARK7/BUB3/RNF144A/SDF2/NUB1/UBQLN2/RNF121/W  
 PN6/PSMD13/CHMP3/PSMC4/HAUS8/PML/DYNC1LI1/CIT/PLK4/ANAPC11/UBE2D1/PSMD10/PSMD11  
 CT8/GNL3/DRG1/MAPT/ARPC1A/WNT4/NF2/BRK1/CHTOP/ARPC5/ABL1/STMN2/MFF/NSFL1C/ACTR3  
 CLIP3/TFAP2A/MAPT/PDCD6/CYCS/FGD1/OBSCN/CCL3/CDK19/MTCH1/HSPD1/TRAFF7/PIDD1/EEF1  
 28/RPL35A/AP2S1/SET/ATP6VOC/SMARCB1/RAE1/LTBR/ILF3/MVB12A/ISG20/PSMA7/YWHAB/RPS  
 19/NT5C3B/RPLP0/RPL18/RPL23/VIM/SNRPG/TRIM71/RBM17/PLEKHN1/RPL38/HNRNPM/SLBP/KH  
 BD2/PRMT6/BRD7/EYA3/BRD4/NSD1/DYDC2/SKP1/AKAP8/KMT2B/NAA50/SUPT6H/KDM3A/PRKCB/M  
 3B/PSMB10/CXCR3/PSMA5/CD300LF/CCL4/COMMD7/F3/PTPN6/PSMD13/CD27/PSMC4/AGPAT2/CAS  
 AP1A/JMJD4/OPTN/BNIP3L/ADD3/SREBF1/LIMA1/ETF1/CDC37/TECPR1/MRPL37/EIF5A/DSTN/PL  
 NSUN4/RPL13A/DDX10/POLR2D/SART3/TGS1/MTERF3/WDR75/MRPL11/DHX9/FAM207A/BMS1/NOL1  
 /NEB/KPTN/PARVG/TACSTD2/CAPZB/FGD6/RALA/GRB2/NUP155/SMTN/LLGL1/FHOD1/CNN2/CDC42  
 11A/NEDD1/CENPJ/TMEM138/SRF/CC2D2A/YWHAG/IFT20/B9D1/FNBP1L/TNPO1/IFT22/PARVB/DF  
 D1/CNN2/CDC42/ARHGAP18/CALR/PRKCI/TGFB3/INF2/ADRA2A/DNAJB6/FHDC1/SWAP70/CDC42EP  
 SHA/CDC42/KAT2A/IL4R/APP/PPNP/PSMD4/HOXB7/PSMD3/PABPC4/PSMD7/CD8A/LILRB4/AP3D1/R  
  
 XND1/ADAM19/LCK/PTPN6/CD27/PML/IL12RB1/CCDC80/IL15/PIEZ01/IBSP/PTPN23/TACSTD2/R  
 PSMD4/PSMD3/RBX1/CTSD/UQCC2/PSMD7/TMUB2/TBL1XR1/PELI1/CBL/SGTB/GZMA/RPL23/RNF4/  
 SM3/PLXND1/F3/FAM89B/VIL1/ADAMTS9/MAZ/DNAJA4/NDRG4/CCR1/CXCL16/PFN1/ABR/NSMF/C5  
 /RAB10/C12orf57/TNIK/TUBB2B/FGFR2/DVL2/WASF1/INPP5J/MAP4/LST1/NSMF/ARF4/GRB7/LR

R2B/STMN2/RASAL1/SFRP2/NFATC4/PALM/ARAP1/TBC1D7/KEL/DENND5A/DBNL/PLXNC1/DNM2/TC  
L6/RACK1/RFW3/NOSIP/RNF7/CUL4B/TRIM71/GNL3/NAE1/TRIM25/ZNF598/UBE20/PTTG1IP/RN  
KDM1A/PMAIP1/CCT7/TESK1/LYN/ITGB1BP1/RAC1/AKAP8L/IL1B/ACTB/CDK5/TXN/UBE2L3/TCP1  
CTDNEP1/RPL35/RPS20/VPS25/DNAJB6/NUP107/GRPEL2/HK1/RPL18A/GZMB/DNM1L/PPP1R15A/R  
RPS5/CTTN/TCP1/EIF3I/VBP1/MYADM/CENPI/WAS/TAF9/SWI5/EIF2S3/PSMD13/VIL1/CHMP3/PS  
18/RPL23/VIM/OGG1/TRIM71/PLEKHN1/RPL38/HNRNPM/RPL23A/EXOSC3/BTG2/SEC13/PSMD8/DN  
C1/NOB1/GPAT2/NSUN4/INTS4/DDX10/POLR2D/TOE1/DARS2/WDR75/CTU1/TSEN34/FAM207A/BMS  
ALDOC/LAIR1/PNP/CYSTM1/XRCC6/PSMD3/CTSD/PSMD7/GMFG/STX4/PRDX4/CLEC5A/CCT8/TBC1D  
28/MCTP1/RAC1/ITGA2/PLA2G7/MIEN1/IL1B/MTA2/BCAR1/RAP2A/CDK5/PDGFA/FAM83H/SPOCK2  
5/NOTCH1/STAT5A/VEGFA/HSPA5/ANXA3/RAB11A/KIF20B/DUOX1/VPS37B/PPM1F/TWIST1/RHOA/  
R6/ITGAL/CD5/CAV1/ATP7A/PKNOX1/PREX1/DUSP22/ZNF683/CD3G/PTPRC/CLEC4E/METTL3/LOX  
ALDOC/LAIR1/PNP/CYSTM1/XRCC6/PSMD3/CTSD/PSMD7/GMFG/PRDX4/CLEC5A/CCT8/TBC1D10C/F  
BP/CCL3/S100A7/CHN1/CXCL17/AKIRIN1/EXT1/CYP19A1/BIN2/PLXNC1/VCAM1/SLC8B1/PTK2/P  
/RPL36/UBA52/HSPA14/NANOS1/TARBP2/ETF1/RPL19/MRPL37/EIF5A/RPS11/EIF3E/CAPRIN1/R  
HSPD1/TRAF7/PIDD1/EEF1A2/RARG/ABL1/VCP/SFRP2/MFF/RPS7/NFATC4/TRADD/CHEK2/BAD/BC  
GPX1/MSH2/ARF4/CCND2/ANXA4/FAIM/DFFA/IL2RB/BARD1/CIAPIN1/PAX8/BAG3/ARRB2/PRKCI/  
HSPD1/TRAF7/PIDD1/EEF1A2/RARG/ABL1/VCP/SFRP2/MFF/RPS7/NFATC4/TRADD/CHEK2/BAD/BC  
C5AR1/GPX1/MSH2/ARF4/CCND2/ANXA4/FAIM/DFFA/IL2RB/BARD1/CIAPIN1/PAX8/BAG3/ARRB2/  
B7/NKD2/SKP1/ANKIB1/RNF186/DERL1/KCTD13/RNF19A/FBXL18/FBXL2/CDC16/KAT5/UBE2R2/R  
4/LRFN4/DNAJA4/PLK4/PFN1/WASF1/INPP5J/MAP4/OXTR/PARP1/PIEZO1/TACSTD2/RPS3/CROCC  
ST1/SRF/RHOA/WDR75/FNBP1L/GTF2H1/NIN/PSMC5/FAF1/RPA1/BECN1/DPYSL3/EPS8L1/DIMT1/  
NUP43/PML/RPL39/DYNC1LI1/COPS7B/VPS28/RPL35A/AP2S1/SET/ATP6VOC/THOC6/SMARCB1/RA  
IFI16/BANF1/DENR/AP2M1/NUP43/PML/RPL39/DYNC1LI1/COPS7B/VPS28/RPL35A/AP2S1/SET/A  
2/MYCBP/SNU13/GOLGA3/UBE2A/MCM8/SYDE1/MAFF/VCX/AGO2/IL4R/CALR/TGFB3/CTDNEP1/TDR  
N/TIPIN/ODF2/CDK7/PSMA7/UBE2E1/CCND2/POLE4/TFAP4/POLA1/PSMB3/MCM8/ZNF207/TOPBP1  
CPNE1/C1orf35/CAP1/PIK3CD/ASA1/KPNB1/SV2A/SYNGR3/SLC11A1/RNASE2/LYN/RAC1/MAGED  
1/MUC3A/PSMB4/APOBEC3G/JCHAIN/CTSS/CD47/PSMB8/PSMB10/FGR/PSMA5/CD300LF/CCL4/NRA  
F2/CLEC4E/ZCCHC3/METTL3/PPARG/NFKBIL1/PSMB1/TLR8/MAP3K7/PSMB6/ADAR/FFAR2/CNPY3/  
1CC/NDRG4/CCR1/SOCS3/NAP1L2/TUBB2B/IL12RB1/CYP26B1/DVL2/PARP1/IL15/NSMF/MAMSTR/  
GADD45GIP1/NABP1/RBBP7/RAD9A/RPA2/E2F6/NAE1/TIMELESS/MYBBP1A/ZWILCH/RHEB/BTN2A2  
PRY4/TELO2/MAP3K6/IKBKG/GMFG/CBL/STK25/AKT1S1/RACK1/ZNF675/RALB/RGS3/IGF1R/STK3  
/LILRB4/AP3D1/AXL/FADD/BTK/PELI1/CLEC7A/IGBP1/RASAL3/GPR183/WNT4/EXOSC3/BTN2A2/

A7/BATF3/PSMB3/CIAPIN1/DNASE2/SBNO2/DROSHA/CDC42/KAT2A/IL4R/APP/PNP/PSMD4/HOXB7  
NFATC4/PDCD10/FOXF2/PSMB5/IFT172/BCL10/PSMA4/TBX2/TWSG1/PSMD9/LMO4/ADAM17/NOTCH  
G1/LMO4/C12orf4/PTPN2/THBS1/CD177/IL20RB/PAK2/HLA-F/RHBDD3/NKAP/RHOA/GLMN/CD38/

5B/NME6/RACK1/ARHGDI1/VIM/SEMA3C/PMP22/SEMA3E/CLIP3/MAPT/CKAP2/RUBCN/EMILIN1/NA  
8/MCTP1/RAC1/ITGA2/PLA2G7/MIEN1/IL1B/MTA2/BCAR1/RAP2A/CDK5/PDGFA/FAM83H/SPOCK2/  
/STAT5A/VEGFA/HSPA5/ANXA3/RAB11A/KIF20B/DUOX1/PPM1F/TWIST1/RHOA/EMC10/ENPP2/ACT  
R/LCP2/MAPK11/TGFB2/PTPN6/CALCA/MAP3K14/GSK3A/MIDN/SOCS3/TNIK/DVL2/MST1R/PPP1R1  
/OCRL/DNM1L/DNAJB11/CTSD/HSPE1/PGAM5/PPP1R15A/PDCD5/FADD/DNAJC9/CLEC7A/RACK1/AR  
DRG1/MAPT/CKAP2/ARPC1A/WNT4/NF2/BRK1/ARPC5/ABL1/TBCD/STMN2/NSFL1C/ACTR3/ARAP1/D  
G1/CEP250/HAUS6/TRAPPC2L/NDE1/MAPT/PDCD6/BICDL2/NSF/CKAP5/IQCB1/SEC13/RAB3D/RHC  
RA2B/BECN1/SNAPIN/SEH1L/EIF6/UXT/ARF1/KLHL12/HTT/PEF1/IL13RA2/CD84/MAP4K2/CALM3  
YT1/APP/DNM1L/SYT3/SEMA4F/GDPD5/HEY1/KATNB1/SEMA5B/STK25/ABI2/ARHGDI1/VIM/SCN1E

LR/PRKCI/PRRX1/ZMYND8/SEMA4D/SYT1/APP/GAL/DNM1L/SYT3/SEMA4F/GDPD5/HEY1/RPS19/KA  
/TCP1/FGR/PTPN6/VIL1/CHMP3/PPP1CC/GSK3A/AP2M1/ABCA2/NDRG4/PML/STAC3/VPS28/BYSL/  
R5/CDK5/WFS1/TXN/CBX4/CTTN/RNF157/TAF9/VIL1/CD27/PTRH2/MAZ/PTGFR/NUAK2/SOCS3/FG  
C42/VPS18/CHCHD3/CHMP1A/CALR/PRKCI/CTDNEP1/ZMYND8/CCR5/SYT1/OCRL/DMPK/GZMB/DNM1

E2/CDC42/KAT2A/ATXN7L3/NUP107/PSMD4/CBX8/DCUN1D5/KLHL17/PCGF2/DNM1L/TRPM4/PSMD3  
M107/RNF4/RALB/CENPN/WDR1/CEP250/HAUS6/PACS2/ATP6VOD1/NDE1/RPL38/DRG1/MAPT/TTC2  
CASP8/RPL5/RPS27A/ARFRP1/SH3GLB1/RPS12/TOMM22/RPS4X/RPL6/OPTN/RAB3A/RPL37/RPL27  
TM1/PPP4C/PTPRF/TIMELESS/PTTG1IP/IGF1R/MAPT/EID3/UBXN1/SEC13/GRINA/PTGES3/ABL1/  
F207/ARHGAP18/PRKCI/TGFB3/APP/DNAJB6/FHDC1/SWAP70/CDC42EP2/KATNB1/GMFG/ABI2/VIM  
DAM19/LCK/PTPN6/CD27/LRFN4/RAB10/IL12RB1/IL15/SIGLEC1/PIEZ01/PTPN23/TACSTD2/RPS  
C2D2A/YWHAG/IFT20/B9D1/FNBP1L/TNPO1/IFT22/PARVB/DPYSL3/EPS8L1/EPHA2/TTLL3/CCL19  
/NFATC4/PALM/ARAP1/TBC1D7/KEL/DENND5A/DBNL/PLXNC1/DNM2/TCTEX1D2/PTK2/STYXL1/VPS  
LSPN/CEP41/CCND3/PSMB5/PSMA4/HSP90AA1/PSMD9/ADAM17/CDK2AP2/DCTN1/CEP164/HAUS7/N  
PPP1R9B/E2F8/CSNK1E/PRMT2/LZTS2/CEP85/E2F4/PSMB2/INCENP/RAB35/FGFR1/PIM2/PSME3/  
IRF4/AGO1/MYC/BGLAP/PRMT6/CD4/IFNG/ANXA1/PSMB7/CCR2/KMT2B/PRKCB/PPP2R3C/ACE/ESR  
MBIM1/BCL2L1/CD2AP/EDEM2/RAB11A/ZPR1/RAB29/KIF20B/CACNB3/CDK5R1/UBR5/PPM1F/RASS  
1/RAP2A/CDK5/PDGFA/FAM83H/SPOCK2/MCAM/FGR/CXCR3/CCL4/MYADM/WAS/TGFB2/GPSM3/PLXN  
1A/KIF20B/DUOX1/PPM1F/TWIST1/RHOA/EMC10/ENPP2/ACTN4/PDPN/LGMN/TNFRSF14/HBEGF  
N2/HNRNPA2B1/U2AF1L4/ELAVL1/LUC7L3/SRSF3/UBL5/TRA2B/SUGP1/GEMIN5/DDX1/LSM3/C1QE  
.1/U2AF1L4/ELAVL1/LUC7L3/SRSF3/UBL5/TRA2B/SUGP1/GEMIN5/DDX1/LSM3/C1QBP/NOVA1/SRS  
.1/U2AF1L4/ELAVL1/LUC7L3/SRSF3/UBL5/TRA2B/SUGP1/GEMIN5/DDX1/LSM3/C1QBP/NOVA1/SRS

2/TRAPPC1/GSDMD/STK10/GPR84/CNN2/IL4R/ALDOC/LAIR1/PNP/CYSTM1/XRCC6/PSMD3/CTSD/P  
/RHOA/GLMN/CD38/INHA/AP3B1/STXBP1/TNFRSF14/IDO1/RUNX3/ZMIZ1/ADORA2B/CCL19/XCL1/  
2B/PSMA1/TNFAIP3/KCNN4/CSK/ACTR3/MAPKAPK3/PSMB5/CD33/BCL10/PSMA4/SPPL3/HSP90AA1  
/PRPF4/THOC1/GTF2F1/DHX38/ERCC3/PABPC1L/DBR1/GEMIN2/PABPN1/SRSF1/SRSF2/SRPK2/PA  
SMAD3/GEMIN5/TP53/STRADA/IWS1/TARDBP

EF3/SRGAP2/DNM2/ARHGEF25/TNK2/NOTCH1/ARHGEF11/RAB3A/CD2AP/RAB11A/PLEKHG6/DENND4  
S1/TARBP2/ETF1/CDC37/PSMC3/POLR2I/EIF5A/POLR2J/EXOSC1/EIF3E/CAPRIN1/RPUSD3/NSUN

AR1

OLN1/CLEC16A/VTA1/TAOK1/MRPL42/KIF24/PHF23/WNT3A/MRPL22/MRPL58/MRPL38/MRPS30/GS  
B7B/CDC26/WDR70/TRIP12/KLHL22/ANAPC1  
B2/GMFB/HAX1/ATR/DAB2IP/CAMSAP1/PREX1/ARFGEF1/ERCC3/STUB1/VPS16/BIK/ADD1/DDB1/M  
/TRAPPC1/GSDMD/STK10/GPR84/CNN2/IL4R/ALDOC/LAIR1/PNP/CYSTM1/XRCC6/PSMD3/CTSD/PS  
3/CTSD/PSMD7/GMFG/PRDX4/CLEC5A/CCT8/TBC1D10C/FCGR3B/HPSE/RAB4B/S100A7/KCNAB2/GC  
OLE4/TFAP4/POLA1/PSMB3/MCM8/ZNF207/TOPBP1/PRIM2/APP/PSMD4/CETN2/PSMD3/RBX1/PSMC

/TSC1/HDAC3/SMAD3/GEMIN5/TP53/STRADA/IWS1/TARDBP  
P4/KLHDC8B/RAE1/CDC123/TIPIN/KIF2A/CDK7/CCND2/RPS3/RALA/PARD6B/CDC42/ZNF207/CHM  
1/MAPKAPK5/HEG1/GTF2H1/ADORA2B/UBE2N/KITLG/KSR1/CCL19/PIK3R6/IRAK2/DUSP18/HTT/E  
K24/SFRP2/TNFAIP3/MFF/RPS7/NFATC4/PDCD10/TMC8/TRADD/CHEK2/BAD/BCL10/ERP29/TM2D1

QBP/APEX1/PARN/SRSF10/PSMD12/RNF40/SRSF7/TRA2A/METTL16/ZC3H12D/DCP1A/SMU1/PSME2

EIF2B4/MAP3K7/NFKBID/PSMB6/FFAR2/CD22/PLA2G6/ICAM2/PSMA3/PDE4B/EIF2B1/CD4/RELA/  
LSM1/RPS9/RNASEH1/SND1/KHSRP/RPS14/RPS27/EXOSC2/ZC3HAV1/RPL29/LARP1/YTHDF2/CASC  
B/HNRNPA0/PSMB1/MOV10/RPL4/RPL41/SMG7/RPL9/RPS6/RPL24/PSMB6/GTPBP1/RPL11/RPL10/

/SUPT6H/KDM3A/CDK5RAP2/RAB7A/CARMIL2/LIG3/MUL1/XRCC5/TP53/LILRB2/FEZ1/ARPIN/CHM

S24/METTL2A/WDR12/THADA/PDCD11/USP36/AGO1/RPL14/DDX51/DUS1L/RPL10A/ZNHIT3/HNRNP

GF2R/SETDB1/TRIM62/POLR2B/CD4/APOBEC3F/IFNG/AIM2/FAM111A/NOD1/TRIM15/RAB7A/ZMP

/PAM16/MAPK15/TERF1/HNRNPA2B1/SUPT6H/MBD1/ERCC2/E2F7/KCTD13/ZMPSTE24/TMEM161A/L  
DOCK8/TNFRSF1B/NFKBID/CASP3/CLPTM1/CD22/ICOS/SH3RF1/IRF4/CD4/IFNG/ANXA1/CCR2/HL

/RPL14/DMTN/RAB3IP/SRP19/RPL10A/RPL12/SRP14/BLZF1/ATG3/RPS18/RPS28/RPS17/RPL22/  
1/PSMD9/ADAM17/CDK2AP2/DCTN1/CEP164/HAUS7/NBN/PLK3/ZFYVE19/HAUS5/DYNC1I2/RAB11A  
/BIK/BDKRB2/P4HB/MNT/STK4/TRIM32/RPL11/SH3RF1/RTKN2/PLA2G6/MADD/NOX1/PARK7/ING2

RPS28/RPS17/NOLC1/RPL26L1/TSC1/NOL11/ERI1/NSUN5P2/ZNHIT6/TSR1/RPP38/C1QBP/MRPS1

MIN4/NCBP1

1/SF1/USP4/SF3A1/CLP1/NUDT21/EIF2A/EIF2S1/GEMIN4/NCBP1













LD1/RAB36/GNA13/RAB8B/RAB1B/ARHGEF18/NCKAP1/LPAR1/BCR/MADD/PARK7/RHOH/F2RL2/BRA  
P1/AKAP8/KMT2B/NAA50/SUPT6H/KDM3A/PRKCB/KDM4A/WBP2/ZMPSTE24/HDAC3/BAP1/SETD1A/S  
B/ARHGAP17/LLGL2/RALBP1/ARHGAP33/EVI5L/PROM2/ASAP3/RALGAPB/RSU1/DOCK8/PLXNB2/PI  
12/STK10/MTCP1/TGFB3/MUC20/VPS25/APP/ADRA2A/XRCC6/SPRY4/TELO2/MAP3K6/IKBKG/DSTY  
2/RHEB/NF2/CCL3/CHN1/PRPF19/ZNF335/CBFA2T2/ABL1/STK24/STMN2/RASAL1/SFRP2/NFATC4

LC11A1/CD209/LYN/HLA-DRB5/CARD11/GPRC5B/FPR3/MUC3A/RAC1/CBFB/PSMB4/IL1B/ACTB/BC  
M04/PTK2/THBS1/ADAM17/PTPN1/RPS27A/NBN/NVL/VEGFA/PFKFB2/PLA2G1B/PAK2/MASTL/TRAF

C4A/APPL2/RPS6KA3/TLR1/S100A1/NOD2/XRCC5



/RBPJ/CCAR2/AP2A1/NPHP4/SNX3/TLE6/BARX1/KLHL12/EGF/CAV1/LDB1/DAB2IP/DKKL1/CBY1/  
3/GLMN/RNF8/ANKZF1/TMUB1/PSMC5/FAF1/ARRDC1/CCAR2/FBXL7/UBE2N/ANAPC5/HECTD3/CDC2  
D3/KCTD5/FOXF2/BAG2/CHEK2/RNF216/PSMB5/PSMA4/HSP90AA1/SGTA/PSMD9/RCN3/PTK2/UBL7  
/COX14/CALM3/CSNK2A2/PARL/TIMM23/NECTIN2/NDUFB4/TIMM8B/HUWE1/PITRM1/BIK/NAIF1/S

/RPS23/RPS10/MRPS17/MRPS21/SPPL3/EIF3K/HSP90AA1/RPS15/RPS16/MRPS15/THBS1/EIF3M/  
2/VCP/VHL/WSB1/PSMA1/TNFAIP3/USP5/RPS7/FOXF2/BAG2/TBC1D7/RNF216/PSMB5/BCL10/PSM  
5/FAF1/ARRDC1/CCAR2/FBXL7/UBE2N/ANAPC5/HECTD3/CDC27/CDC34/HSP90B1/USP48/UBE4B/A  
3/MAGEF1/MAP1A/USP27X/HSPA5/FBXO45/UBA52/CD2AP/EDEM2/TRPC4AP/PCYOX1L/RNF213/PSM  
1/PSMC5/RBPJ/CCAR2/AP2A1/NPHP4/SNX3/TLE6/BARX1/KLHL12/EGF/CAV1/LDB1/DAB2IP/DKKL  
G02/ALDOC/MUC20/TMEM258/CHPF/APP/NUP107/MVD/HK1/SLC35C1/RRM1/ST3GAL5/PIGT/POMGN  
11/GPRC5B/CCDC22/RAC1/UNC5CL/IL1B/LAMTOR5/PDGFA/LAMTOR1/TXN/MLKL/S100A13/ADRA2C

MEM127/BLZF1/DNAJC13/PRKCB/RAB2A/RAB7A/CNEP1R1/ZMPSTE24/CHMP6/CUL7/SYP/PPP2CA/S

TLR7/HSP90B1/CCL3L3/IRAK2/OSM/IL17D/CAV1/DAB2IP/IL17RB/NECTIN2/CLEC4E/ZCCHC3/CN  
P157/TRAF3IP1/ATAT1/CEP126/CLUAP1/CFAP53/CEP162/KIFAP3/DCTN3/NEK8/ALMS1/SCLT1/M

78/EHD3/SPATA6/ATXN10/CFAP157/PKD2/TRAF3IP1/ATAT1/CEP126/CLUAP1/CFAP53/CEP162/K



FBXL7/UBE2N/ANAPC5/HECTD3/CDC27/CDC34/HSP90B1/USP48/UBE4B/AUP1/MAEA/CACUL1/EGF/  
.1/SPA17/NOTCH1/CFTR/GJB3/PAQR7/RNF2/THRA/VDAC2/ERCC1/RAB3A/PRSS21/HEXB/MASTL/BC  
DAM28/SRPK1/BAD/DNM2/SPIRE1/SPA17/NOTCH1/CFTR/GJB3/PAQR7/RNF2/THRA/ERCC1/PRSS21  
AD/DNM2/SPIRE1/SPA17/NOTCH1/CFTR/GJB3/PAQR7/RNF2/THRA/ERCC1/PRSS21/HEXB/MASTL/H  
DNAJC13/PRKCB/CNIH2/PIK3R2/CHRNA5/NOLC1/PTPN14/UBL5/SYP/NUP214/HDAC3/BAP1/SMAD3





FB2/CD27/CALCA/MAP3K14/NDRG4/CCR1/SOCS3/TNFK/FGFR2/DVL2/MST1R/IL15/PSMD10/GCN1/



YK/CBL/AKT1S1/ANGPT2/TRIM71/ATP6V0D1/IGF1R/HNRNPM/PDCD6/ARPC1A/WNT4/CSPG4/CHN1/  
SIX5/CSNK2A2/PABPC1L/ACTR1A/NECTIN2/YTHDF2/BAG6/RFX2/SLC04C1/CNR1/ZSCAN2/METTL3  
N1/RPL5/DUS2/FKBP8/PAK2/MASTL/TRIM21/IVNS1ABP/DUSP7/LMTK2/PIH1D1/TARBP2/DGKQ/UE

TNIK/FGFR2/DVL2/MST1R/IL15/PSMD10/SMYD3/LTBR/C5AR1/LRP8/CCND2/RPS3/PRKD2/ARRB2/  
/PIK3R6/IRAK2/CACUL1/EGF/MAP4K1/MAP4K2/DAB2IP/HMGA2/RPTOR/CALM3/CIB1/PKD1/BORA/

SIN2/FBX045/BCL2L1/RAB11A/TUBB3/KIF20B/IFRD1/PACSIN1/CDK5R1/METRN/PARD3/APBB1/S  
PBB1/SRF/CAPRIN1/RHOA/CD38/RAPGEF1/YWHAG/GAK/SIX1/ACAP3/DNMT3B/GPC2/NIN/ADCY6/D  
IF20B/IFRD1/PACSIN1/CDK5R1/METRN/PARD3/APBB1/SRF/CAPRIN1/RHOA/STXBP1/ENPP2/ROBC  
/PTPN6/PSMD13/IFI16/PSMC4/MUC5B/IL12RB1/COCH/CD79A/UBE2D1/IL15/PSMD10/PSMD11/PS  
MT10C/TPR/PASK/LSM14A/METTL16/EIF4ENIF1/ZC3H12D/STAT3/MRPS27

BEC3F/HYAL2/IFNG/CD207/RELA/AIM2/FAM111A/POLR3A/HLA-E/CHGA/NOD1/TRIM15/NLRC4/ZM  
/PPP2CA/SHTN1/BAP1/SMAD3/UNC13A/TTL/TSG101/TP53/BCL11A/DPYSL2



/ANXA11/IL1B/EHD2/ACTB/CDK5/JCHAIN/DNER/CD47/ANKRD13B/CTTN/FGR/CD300LF/LOXL2/WA

TP2B4/PRKAG1/PIK3R5/MAP3K1/MINK1/RPLP1/MAPKAPK5/TIGAR/ADCY6/ADORA2B/UBE2N/ADCY5

/CDC42SE1/LDLRAD3/IL2RB/GRB2/ARRB2/CD6/CDC42/CALR/GRK2/CDC42SE2/SYT1/APP/SNX12/  
PYM1/EIF2B1/AGO1/EIF5B/FXR1/IFNG/EIF2AK1/SYNCRIP/EIF4G1/CNOT2/EIF2B2/SESN2/ELAV

NREP/FIBP/FGR/LCP2/MAPK11/TGFB2/F3/FAM89B/LCK/VIL1/GSK3A/AP2M1/NDRG4/PML/SOCS3/  
K5R1/METR1/PARD3/APBB1/SRF/CAPRIN1/RHOA/STXBP1/ENPP2/ROBO3/PDPN/MINK1/NIN/NRTN/

1/EXT1/ABL1/TBCD/VCL/NFATC4/KEL/DBNL/PLXNC1/HSP90AA1/SRGAP2/DNM2/PTK2/NOTCH1/MA  
/ARRB1/TPR/EZH1/MCM3AP/OGT/KANSL2/NUP50/BRD8/SETD4/MSL1/KMT2A/HMG20B/CPA4/JARID

B1/FGFR2/COCH/CCDC80/MST1R/IL15/ABR/ILF3/C5AR1/ISG20/GPX1/BATF3/PF4V1/EXOSC5/GS  
A/STXBP1/ROBO3/MINK1/NIN/NRTN/SPTAN1/EPHA2/ARTN/IST1/DOCK10/NEO1/ATP7A/DAB2IP/E  
B1/FGFR2/COCH/CCDC80/MST1R/IL15/ABR/ILF3/C5AR1/ISG20/GPX1/BATF3/PF4V1/EXOSC5/GS  
PR1/TIMM10/AIP/RPL19/UBR5/VPS37B/UBE2D2/NDUFA13/RPS11/RPL13A/VPS11/AP3B1/YWHAG/

SNK2A2/STUB1/LARP1/VPS4A/RAB1A/KIAA1324/SNX5/VPS16/SNRNP70/FEZ2/MTMR14/PIK3CB/R  
4/PTGFR/PML/RPL39/IL12RB1/FGFR2/COCH/CCDC80/MST1R/IL15/ABR/ILF3/C5AR1/ISG20/GPX  
2/GSPT2/RPS7/FARSA/RPL7A/RPS23/RPS10/MRPS17/MRPS21/EIF3K/RPS15/RPS16/MRPS15/THE  
SNK2A2/STUB1/LARP1/VPS4A/RAB1A/KIAA1324/SNX5/VPS16/SNRNP70/FEZ2/MTMR14/PIK3CB/R

:/UNG/HLA-DOB/CTSL/CD4/IFNG/ANXA1/CCR2/KLHL6/HLA-E/SUPT6H/CD19/POU2F2/PRKCB/CLEC

.6B/TRIO/LHX2/PTPRA/SEMA4C/PTPRS/DOCK7/TRAK2/PLXNB3/SHTN1/LAMA1/USP33/TTL/NEFH/F

BCG1/CARD18/BTN2A2/CCL3/ACHE/CEMIP/SLC25A5/PKIA/ABL1/EMD/FCGR2B/PIM3/WRAP53/TNF

MA7/YWHAB/RPS3/PRKD2/PSMB3/IL2RB/GRB2/ARRB2/TGFB3/MUC20/CCR5/XCL2/APP/ADRA2A/CS  
ELI1/CLEC7A/TNIP1/EIF2B5/LBP/ARPC1A/BTN2A2/BRK1/HSPD1/PSMD8/ARPC5/ABL1/FCGR2B/P  
R/PREX1/ARFGEF1/HRH1/ADNP/ADD1/RYK/MYO1C/BDKRB2/SPIRE2/FSTL4/NCKAP1/PPP1R9A/KCN  
CDC88C/MESP1/ATP6AP2/RNF213/MECP2/CACNB3/SULF2/UBR5/PORCN/PSMC3/RHOA/STK3/GSKIP

IM32/SEMA3F/MEGF8/ULK1/TCHP/KAZALD1/HYAL2/ARIH2/TRIM46/SEMA6B/EIF4G1/LHX2/SESN2





MA7/YWHAB/RPS3/PRKD2/PSMB3/IL2RB/GRB2/ARRB2/STK10/TGFB3/MUC20/CCR5/XCL2/APP/ADR





1/ANOS1/LRP4/WNT5A/PPP3CB/OLFM1

P5/PICALM/TMED2/VPS41/GOLGA2/SDCBP/TRIM9/SNAP47/HOOK3/CREB1



D11/RAE1/PSMD1/ATP6V0E1/GPX1/TNFSF12/PSMA7/EXOSC5/YWHAB/SAMD4B/PSMB3/DFFA/BARD1



NUP107/PSMD4/DNM1L/PSMD3/RBX1/PABPC4/UQCC2/PSMD7/IKBKG/PIP4K2C/RPL23/WDR91/RACK

A3/KIF20B/RIPPLY2/SULF2/PSMC3/TWIST1/SRF/CC2D2A/STK3/GLMN/B9D1/SIX1

2/CDK11B/ENOX2/BCL2L1/EGLN2/GLI1/RAB11A/ZPR1/NANOS1/CRLF3/MORF4L2/IFRD1/ALOX15E  
ATAD5/CRTC3/CALM3/EPHB2/CIB1/PTPRC/LITAF/OTUD3/BDKRB2/PIN1/LPAR1/TRIM32/NFKBID/

2/PHF6/SLC39A3/KIF20B/RIPPLY2/CDK5R1/SULF2/PSMC3/TWIST1/SRF/CC2D2A/STK3/GLMN/B9

.1/ST3GAL5/POMGNT1/MGAT4A/NAGPA/STK25/ARFIP2/NOSIP/M6PR/CSPG5/COPG1/B4GALNT3/TRA  
SFR1/HAT1/CSNK2A1/USF1/MBD3/NBN/NOL6/HNRNPU/RNF2/ANP32E/SYCE1L/ERCC1/EXOSC9/ADC  
45B/ABCA2/PLA2G15/DRAM2/SLC29A3/GALNS/DSN1/SLC44A2/SLC15A3/AP2S1/OSTM1/BGN/UBA1  
RCAP/HMGA2/MORC2/CSNK2A2/SIN3B/PAF1/RRAP/JUNB/TFPT/TRPS1/ASXL1/USP3/TTI1/PARK7  
BLM/RSPH1/NHP2/SCMH1/ITGB3BP/HDAC2/AUNIP/CDK2/SMC4/KDM1A/NASP/DCTN2/HMGN4/KNSTR  
PHOSPH6/CDKN2AIPNL/DSN1/PLK4/ANAPC11/BYSL/ZNF692/SURF2/LYAR/PARP1/SMARCB1/RAE1/  
45B/ABCA2/PLA2G15/DRAM2/SLC29A3/GALNS/DSN1/SLC44A2/SLC15A3/AP2S1/OSTM1/BGN/UBA1  
ITAF/ATRAID/PLD1/KIAA1324/SLC04C1/VPS16

SS/LAMTOR1/TMEM9/GNS/S100A13/FTL/NFAM1/GNB1/KXD1/AP2M1/WDR45B/OSBPL7/ABCA2/PLA2  
A1/PLK3/BICD1/CCDC85B/HNRNPU/ZFYVE19/RAD18/GNAI3/CCNE2/MARK4/RITA1/HAUS5/MASTL/  
1/CETN2/ACTL8/KATNB1/WRAP73/CCDC120/CEP250/CCT8/HAUS6/DPF2/PPP4C/ATP6VOD1/NDE1/

S10/CDH24/PTPN12/RPS15/MPP7/CTNNA1/DNM2/PTK2/RPS16/ADAM17/TNK2/RPL5/NOTCH1/CAPN  
BHD17A/CLTC/SNX17/GOSR2/RAB27B/AP2B1/IFITM3/ATG9A/BECN1/TMEM184A/AP2A1/VPS33A/T  
M2/NECAP2/AGPAT2/CLTB/AP2M1/RAB10/DYNC1LI1/ZPLD1/NCALD/MYOF/SLC44A2/GAD1/AP2S1/  
STN/PLEKHH2

RUFY1/CHEK2/PRKAA2/TATDN2/WTAP/NBN/INPPL1/FNDC1/HNRNPU/RNF2/SP140/PIAS4/RAD18/S

C1orf35/CAP1/ASAH1/KPNB1/SLC11A1/RNASE2/RAC1/ANXA11/IL1B/MAGED2/CTSS/PDGFA/LAMT  
YNC1LI1/ZPLD1/NCALD/MYOF/SLC44A2/GAD1/AP2S1/ATP6VOC/C5AR1/TMEM63A/HLA-B/ATP6VOE  
SSRP1/ACTB/MTA2/WDHD1/NCAPH2/TCP1/CENPI/LOXL2/WAS/SWI5/SFPQ/DNMT3A/THOC5/NUP85/  
/CLTB/RAB10/NCALD/SMPD4/CIT/BGN/LST1/A4GALT/CHST2/KIAA0319L/LMTK3/HLA-B/QPCTL/G  
MEM199/CCT8/GNB4/ATP6VOD1/NSF/HPSE/SLC48A1/RHEB/VMP1/CSPG4/SGSH/S100A7/GCA/SEC1  
AP2A2/VAC14/RAB11A/YIPF2/MITD1/ARL8B/VPS37B/VPS11/ABHD17A/CLTC/SNX17/GOSR2/RAB2  
MX/NCAPD3/SRF/TEX11/ACTR5/GATAD2A/DHX9/SMARCA5/RUNX3/DMAPI/CCAR2/POLE3/RPA1/PMF  
RAPPC2L/RAB4B/NF2/MEIS2/ACHE/RAD51C/LIMS1/TAF10/ABL1/VCP/STMN2/UBQLN4/SIPA1/STX  
TRIP6/RPL7A/ACTR3/RPS10/CDH24/PTPN12/RPS15/MPP7/CTNNA1/DNM2/PTK2/RPS16/ADAM17/T  
PARM1/LLGL1/CDC42/PRKCI/PLEKHJ1/TPST1/CHPF/APP/SLC9A7/OCRL/DNM1L/AP1G2/AP3D1/TR  
ITAF/ATRAID/PLD1/KIAA1324/SLC04C1/VPS16

4/FHOD3/CAMSAP2/HCLS1/PSTPIP1/HSPH1/CCT7/GLRX3/DCTN2/KNSTRN/REEP2/FKBP4/RAC1/FE  
4/FHOD3/CAMSAP2/HCLS1/PSTPIP1/HSPH1/CCT7/GLRX3/DCTN2/KNSTRN/REEP2/FKBP4/RAC1/FE  
1/STX10/SLC2A5/GPI/RAB35/PA2G4/SERPINB1/PPIA/PAM/SNX10/MT3/RAB24/ACLY/DYNLT1/GT  
/CAMSAP2/HCLS1/PSTPIP1/HSPH1/CCT7/GLRX3/DCTN2/KNSTRN/REEP2/FKBP4/RAC1/FBXO32/CE  
F2A/ODF2/KPTN/SMTN/ZNF207/VPS18/DNAL4/FHDC1/MYO9B/DNM1L/KATNB1/SCTR/MYO5A/VIM/K  
PLP0/NOC4L/RPL18/RRP7BP/GTF3C1/RPL23/UTP11/RACK1/GADD45GIP1/VIM/LAS1L/SNRPG/MRF

RPLP1/RPL30/PARVB/EPHA2/CORO2B/HSP90B1/ARF1/PDIA3/RPS9/CAV2/CAV1/RPS14/ARHGAP22  
/RPL30/PARVB/EPHA2/CORO2B/HSP90B1/ARF1/PDIA3/RPS9/CAV2/CAV1/RPS14/ARHGAP22/PTPR  
A/FAP/RPLP1/RPL30/PARVB/EPHA2/CORO2B/HSP90B1/ARF1/PDIA3/RPS9/CAV2/CAV1/RPS14/AR

/ACTG2/SNX5/C2CD5/ASAP3/MTMR14/MYO1C/ANTXR1/DOCK8/NCKAP1/PLCG1/PPP1R9A/LAYN/ABC

P1S2/AP2B1/WDR41/IFITM3/MANBA/SPNS1/BRI3/SNAPIN/AP2A1/VPS33A/SEH1L/VASN/TLR7/NA



TP6V1E1/EHD2/LAMTOR5/RAP2A/CTSS/LAMTOR1/TMEM9/DNER/ANKRD13B/ADRA2C/PHB/PI4KB/CH  
R1B/DAD1/WTAP/CCNJL/FBXW5/RNF2/PIAS4/RAD18/FNTB/ERCC1/MED27/CCNE2/RABGGTB/FNTA/

A/TBC1D20/RTCB/LRPPRC/TRIM27/KPNA4/AAAS/BRAP/IGF2R/SHISA5/ABCF1/PLPP7





BAC1/ABI2/MYO5A/CSPG5/EPB41L3/HTR3A/ATP6VOD1/RPL38/MAPT/NSF/HNRNPA3/RHEB/GABRD/

1A/ASCC3/TEPSIN/APEX1/PDX1/TMEM179B/SRSF10/MAML2/SMURF2/SRSF7/PRPF40B/CACTIN/RS

CN1B/HTR3A/PTPRF/MAPT/NSF/TMEM266/TMEM185A/UBXN1/EEF1A2/ABL1/FCGR2B/STMN2/SGCE/

P/DHX30/PPARG/FOSL2/TTF1/MNT/ASXL1/CIC/USP3/CHD7/HNRNPD/NCOA6/PHF1/HNRNPC/LRWD1  
19/CTBP1/CDYL/UXT/TFDP1/ARID5B/TLE6/CCAR1/SND1/LDB1/TP53BP1/SRCAP/HMGA2/GTF2F1/  
/EPHA2/SBK1/KSR1/CDK11A/PDK3/IRAK2/CCL8/MAP4K1/ATR/MAP4K2/MKNK1/EPHB2/ERCC3/CSN  
C6/VCL/THBS2/RPS7/RPL7A/ACTR3/RPS23/RPS10/LAMA4/KRT10/MRPS17/COPG2/COL9A3/MRPS2  
/PRKRA/GMFB/CCL8/EGF/CAV1/ATP7A/DNAJC1/DAB2IP/RPTOR/ARL1/PREX1/GTF2F1/ARHGAP22/  
P1/GAS2L1/FERMT1/AATF/TNNI2/MYO1G/CAP1/CAPZA1/MYO1F/YWHAH/KIF14/FHOD3/CAMSAP2/H  
KAA2/ACVR1B/STK40/DGKA/PTK2/CSNK2A1/TNK2/CCNJL/GUK1/NME3/AAK1/PLK3/PFKFB2/CCNE2  
IRAS2/PSMC4/ATAD2/ABCA2/RAB10/DYNC1LI1/TUBB2B/GMPS/TUBG2/ATP6VOC/EIF4A3/KIF2A/A  
IRAS2/PSMC4/ATAD2/ABCA2/RAB10/DYNC1LI1/TUBB2B/GMPS/TUBG2/ATP6VOC/EIF4A3/KIF2A/A  
IRAS2/PSMC4/ATAD2/ABCA2/RAB10/DYNC1LI1/TUBB2B/GMPS/TUBG2/ATP6VOC/EIF4A3/KIF2A/A  
AB10/DYNC1LI1/TUBB2B/TUBG2/ATP6VOC/EIF4A3/KIF2A/ATP6VOE1/CDK7/MSH2/ARF4/CHD4/RU  
TELO2/MAPK7/PPP1R15A/CARD16/CD8A/RPS19/AP1B1/CBL/ABI2/ANGPT2/VRK1/RACK1/RAD9A/C  
/STK38/RHEB/CSPG4/DBF4B/LIMS1/ACVR1/EEF1A2/PKIA/TNNI3/ABL1/RPS7/CALM2/PDCD10/TC  
X1/ZMYND8/APP/KLHL17/DNM1L/CARD16/AFAP1/SH3GL1/IKBKG/FADD/RRM1/CBL/ABI2/RACK1/M  
PA1L2/ARHGDIB/TBC1D30/RARRES1/OAZ3/HSPH1/ITGB1BP1/BIRC7/GPRC5B/ADRM1/CDKN1C/UBE  
CDHR2/STK24/EMD/VCL/SFRP2/RPL7A/CDH24/TXNDC9/DBNL/VCAM1/MPP7/CTNNA1/PTPN2/THBS1  
/PAK2/RUSC2/RCC1L/GGA3/RILPL1/PLEKHG6/DENND4B/RAB29/YIPF2/XPO7/ADPRH/STOML2/RAS

GEF17/PREX1/CIB1/ARHGAP17/LLGL2/RALBP1/EVI5L/MYO1C/KIF3A/ARHGEF18/NCKAP1/TBC1D2  
GF/CAV1/ATP7A/ARHGEF17/PREX1/CIB1/ARHGAP17/LLGL2/RALBP1/EVI5L/MYO1C/KIF3A/ARHGE

P4K2C/RPS6KB2/BTK/DSTYK/STK25/NME6/VRK1/ITPKC/GMPPA/CSNK1G2/POLD3/POLR3D/IGF1R/

E2/MARK4/PAK2/MASTL/CDK11B/CSNK2B/TBRG4/LMTK2/MAP3K10/TP53RK/DGKQ/CDK5R1/NUAK1/





/RNF25/AIP/DGKQ/BAZ2A/TWIST1/APBB1/TCERG1/SRF/DAXX/TEAD3/NEK6/HES2/ENPP2/SIX1/A

/TWISTNB/SKIV2L/MMR1/CDKAL1/XRN2/TRIT1/PCIF1/CNOT1/POLR3G/DHX32/TUT1/LRRC47/NSU





./TRIM5/TRIM3/TRIM36/MED31/HACE1/UBE2V2/G2E3/RMND5B/NSMCE1/MALT1/FBX030/RNF139/N

1/MEIS2/ZNF335/HSPD1/RARG/ABL1/ZNF746/NFATC4/TDG/AKNA/FOXF2/ZNF605/MYEF2/TBX2/C

TK2/SPIRE1/CDK2AP2/CCSAP/DCTN1/HAUS7/FBXW5/KATNA1/PLK3/BICD1/HNRNPU/MAP1A/MARK4  
 TICRR/TGFA/RRS1/KNTC1/PPP1R9B/E2F8/DDIAS/CSNK1E/PRMT2/LZTS2/CEP85/E2F4/PSMB2/I  
 H/DVL2/WASF1/LST1/COL6A2/NSMF/NES/VDR/SIPA1L3/GRB7/LRP8/PARVG/CDC42SE1/TACSTD2/  
 NP/TLR5/POLR2K/HK1/XRCC6/GPATCH3/TRPM4/CARD16/AXL/FADD/BTK/PELI1/CLEC7A/UBE2L6/  
 IL6/ITGB8/CLEC5A/TRIM25/POLR3D/LBP/POLR3H/HPSE/POLR3C/CARD18/BTN2A2/CCL3/HSPD1/C  
 /RELA/AIM2/CCR2/POLR1C/POLR3A/HLA-E/NOD1/TRIM15/TLR1/NOD2/XRCC5/SMAD3/LILRB1/RN  
 J/CRYGS/ADM/EPHA2/AP2A1  
 GALNS/DSN1/IL12RB1/SLC44A2/IMPDH2/ABR/ATP6VOC/PSMD11/PSMD1/C5AR1/TMEM63A/MSH2/F  
 SLC44A2/IMPDH2/IL15/ABR/ATP6VOC/PSMD11/LTBR/PSMD1/C5AR1/TMEM63A/PADI2/BATF3/TRA  
 CTSD/PSMD7/BTK/GMFG/STX4/CBL/PRDX4/CLEC5A/CCT8/TBC1D10C/LBP/FCGR3B/HPSE/RAB4B/  
 A/PAFAH1B2/RAB3D/ARPC5/VCP/VCL/APRT/PDAP1/HVCN1/VAMP8/BIN2/RAB5C/DBNL/PSAP/CD33  
 GALNS/DSN1/IL12RB1/SLC44A2/IMPDH2/ABR/ATP6VOC/PSMD11/PSMD1/C5AR1/TMEM63A/MSH2/F  
 AM1/FGR/PSMA5/NRAS/WAS/SERPINB6/PTPN6/PSMD13/CD27/AGPAT2/COMMD9/RAB10/DYNC1LI1/  
 S100A7/KCNAB2/GCA/PAFAH1B2/RAB3D/ARPC5/VCP/VCL/APRT/PDAP1/HVCN1/VAMP8/BIN2/RAE  
 2/KAT2A/IL4R/APP/PNP/SWAP70/PSMD4/HOXB7/POLQ/PSMD3/PABPC4/PSMD7/CD8A/LILRB4/AP3  
 L3/ACIN1/RPS6/NFKBID/CHD7/CLPTM1/SH3RF1/IRF4/RHOH/MYC/BGLAP/CD4/IFNG/ANXA1/EIF2  
 DL3B/ADAM8/HLA-DQA2/MYO1G/EVI2B/NONO/ULBP2/CCL2/PIK3CD/CXCL13/NLRC5/PLSCR1/HCLS  
 N2/CASP8/RPS27A/DMBT1/PAK2/TLR2/MUC6/UBA52/RAB29/MUC15/CACNB3/PLD2/PSMC3/UBE2D2  
 EIF2B1/CD4/RELA/PSMB7/KLHL6/PRAM1/SKP1/EIF2B2/CD19/PRKCB/PIK3R2/CLEC4A/VAV3/AF  
 ISY1/PARP1/SET/RNF113A/SMARCB1/LOX/DONSON/TIPIN/ISG20/CDK7/MSH2/RUVBL2/EXOSC5/  
 PS1/HINFP/DHX9/GTF2H1/DMAP1/TIGAR/RPA1/UBE2N/MMS19/SMARCA1/MUS81/POLR2E/SMUG1/  
 PIH1D1/MORF4L2/TRIM37/MECP2/UBR5/PPM1F/BAZ2A/TWIST1/RBM14/APBB1/DAXX/PPHLN1/ACT  
 BP/KHDRBS1/HNRNPA3/PRPF31/ZMAT5/EXOSC3/SUPT5H/SNRPB2/PRPF19/CHTOP/NAT10/FASTK/U  
 NSUN4/RHOA/RPL13A/MRPL27/MRPL28/HNRNPR/POLR2D/RPL37A/MTERF3/DARS2/MRPL51/MRPL1  
 CPNE1/C1orf35/CAP1/TXLNA/PIK3CD/ASAHI/KPNB1/SV2A/SNF8/SYNGR3/SLC11A1/RNASE2/LYN  
 TPN2/THBS1/ADAM17  
 CBX8/POLR2K/CETN2/XRCC6/HMGN1/POLQ/RBX1/MUTYH/PPP1R15A/PPP5C/FUS/RAD21/IKBKG/BA  
 PA/LLGL1/CDC42/KAT2A/ZNF207/CHMP1A/DNAL4/RANBP1/APP/CETN2/LRRC61/ACTL8/AP3D1/KA  
 ID4/CETN2/PSMD3/RBX1/PSMD7/RAD21/MTBP/NME6/RFWD3/GADD45GIP1/NABP1/RAD9A/CEP250/F  
 PTPN6/PPP1CC/MAZ/PTGFR/PML/IL12RB1/FGFR2/FOLR2/MST1R/IL15/NES/CDC123/MAB21L2/C5  
 MAGOHB/SNRPD3/PRPF38B/HNRNPA0/ACIN1/TFIP11/CELF2/RP9/IK/PPP1R8/RTCB/THOC7/HNRNF  
 WP2/ARIH2/RNF126/TLK2/ANAPC15/PSMB7/NKD2/SKP1/ANKIB1/RNF186/DERL1/KCTD13/RNF19A  
 /RAE1/CDKN2C/PSMD1/DONSON/TIPIN/ODF2/ZBTB17/PSMA7/UBE2E1/CCND2/TFAP4/RBBP4/PSME  
 BAD/SPIRE1/DCTN1/VPS35/CASP8/NBN/SH3GLB1/HNRNPU/ERCC1/OPTN/VEGFA/MARK4/SREBF1/  
 A2/RARG/ABL1/ZNF746/VCP/FCGR2B/SFRP2/MFF/RPS7/NFATC4/TRADD/CHEK2/BAD/BCL10/ARHG  
 3/TFAP4/POLA1/PSMB3/IL2RB/RPL27/GRB2/POLR2L/NUP155/CDC42/KAT2A/VPS18/CBX5/CHMP1  
 DRBS1/HNRNPA3/PRPF31/ZMAT5/RPL23A/EXOSC3/SUPT5H/SNRPB2/PRPF19/CHTOP/BTG2/PSMD8/  
 IBD1/KDM4A/WBP2/ZMPSTE24/HDAC3/BAP1/SETD1A/SUPT3H/MAP3K12/BAZ1A/TP53/IWS1/PHF20/  
 P1/MAP3K14/PML/CCR1/SOCS3/IL12RB1/MST1R/IL15/PSMD10/RNF113A/PSMD11/LTBR/PSMD1/I  
 EKKH2/NEK6/MRPL27/MRPL28/ATG13/GAK/MRPL51/PDPN/MRPL11/FAP/ATG9A/MTPN/SPTAN1/TIG  
 O/RSL1D1/USP39/DIMT1/EBNA1BP2/LUC7L/NOL9/EIF6/UTP23/STRAP/RPP30/SUV39H1/SFSWAP/  
 ARHGAP18/CALR/PRKCI/TGFB3/INF2/ADRA2A/DNAJB6/FHDC1/SWAP70/CDC42EP2/MYO9B/KLHL1  
 YSL3/EPS8L1/EPHA2/TTL3/CCL19/SSX2IP/KLF5/NPHP4/HTT/CAV1/ATP7A/CBY1/DZIP1/CCDC6  
 2/KLHL17/EPB41L1/GMFG/ABI2/ARHGDI/ARFIP2/WDR1/EPB41L3/FMNL3/SEMA3E/FGD1/ARPC1A  
 PS19/AXL/FADD/BTK/BABAM1/ZNF675/WDR1/CLEC5A/DPF2/GPR183/WNT4/TAZ/BTN2A2/CCL3/KC  
 PS3/PRKD2/GRB2/CD6/CDC42/IL4R/CALR/SEMA4D/PNP/SWAP70/MAPK7/RELL2/LILRB4/AP3D1/F  
 WDR91/UBE2L6/RACK1/TMEM199/RNF7/CUL4B/TRIM71/TRIM25/PTTG1IP/RNF122/NSF/HPSE/LON  
 AR1/KIF2A/PTPN23/PADI2/ABI3/GRB7/TACSTD2/PRKD2/SEMA4B/PARD6B/SYDE1/STK10/AGO2/C  
 P8/EMB/BTBD3/DGUOK/SEMA4B/GRB2/PARD6B/LLGL1/CDC42/PRKCI/PRRX1/ZMYND8/SEMA4D/SYT

TEX1D2/PTK2/STYXL1/VPS35/ODF2L/VDAC3/FIG4/MOB2/LLPH/VEGFA/MARK4/LZTS1/HSPA5/DDX  
F122/DCAF15/PDCD6/MED12/LRRC41/PRPF19/UBXN1/PELI3/PSMD8/TRAF7/ABL1/KLHL42/VCP/V  
/ADRA2C/FGR/MAPK11/TGFB2/VIL1/CASP1/GSK3A/AP2M1/MIDN/PML/STAC3/VPS28/BYSL/PARP1  
AD21/CPE/LILRB4/TIMM44/PDCD5/TOMM40L/AP3D1/RPS19/RPLP0/RPL18/MTBP/SGTB/RPL23/NA  
MC4/SRSF12/CLTB/DENR/AP2M1/CENPK/NAP1L4/NAP1L2/COPS7B/PFN1/EDC3/WASF1/ISY1/INPF  
A2/GSPT2/VCP/PSMA1/RPS7/TDG/RPL7A/RPS23/MYEF2/RPS10/PSMB5/PSMA4/PRKAA2/RPS15/PS  
1/TPRKB/NOL10/RSL1D1/TYW3/YARS2/PARS2/TAF13/HARS2/DIMT1/EBNA1BP2/TBP/TSEN15/NOL  
10C/FCGR3B/HPSE/RAB4B/CCL3/S100A7/KCNAB2/GCA/PAFAH1B2/RAB3D/ARPC5/VCP/VCL/FCGR2  
/MCAM/FGR/CXCR3/CCL4/MYADM/WAS/TGFB2/GPSM3/PLXND1/F3/FAM89B/VIL1/CHMP3/ADAMTS9/  
EMC10/ENPP2/ACTN4/PDPN/LGMN/TNFRSF14/HBEGF/KITLG/ARTN/CCL19/XCL1/CCAR1/CCL8/CAV  
L3/DOCK8/TNFRSF1B/RPS6/NFKBID/CASP3/CHD7/CLPTM1/ICOS/NCSTN  
CGR3B/HPSE/RAB4B/S100A7/KCNAB2/GCA/PAFAH1B2/RAB3D/ARPC5/VCP/VCL/FCGR2B/APRT/PDA  
TPN2/THBS1/ADAM17  
PL22L1/RPUSD3/NSUN4/RHOA/RPL13A/MRPL27/MRPL28/HNRNPR/POLR2D/RPL37A/MTERF3/DARS2  
L10/ARHGEF3/CTNNA1/DNM2/TNFSF15/PTPN2/THBS1/STYXL1/CASP8/NOTCH1/PDCD2/RPS27A/CA  
TGFB3/CCR5/SEMA4D/DNAJB6/DPEP1/PCGF2/MAPK7/CARD16/AXL/FADD/DSTYK/CBL/IGBP1/ARHG  
L10/ARHGEF3/CTNNA1/DNM2/TNFSF15/PTPN2/THBS1/STYXL1/CASP8/NOTCH1/PDCD2/RPS27A/CA  
PRKCI/TGFB3/CCR5/SEMA4D/DNAJB6/DPEP1/PCGF2/MAPK7/CARD16/AXL/FADD/PELI1/DSTYK/CE  
AD23A/SVIP/DVL1/DERL3/CLEC16A/UBE2J1/ARRB1/PSMD12/BFAR/ARMC8/SMURF2/OGT/MAPK9/C  
/CAPZB/RALA/STX18/GRB2/FHOD1/CDC42/KAT2A/VPS18/CHMP1A/ARHGAP18/TGFB3/NCLN/ZMYND  
EPAH2/CCL19/CDC34/ARF1/RHOBTB2/GMFB/NPHP4/HTT/CAV1/ATP7A/ATR/DZIP1/EPHB2/ERCC3/  
E1/LTBR/ILF3/MVB12A/ISG20/GPX1/PSMA7/YWHAB/RPS3/TFAP4/POLA1/PSMB3/IL2RB/RPL27/G  
TP6VOC/THOC6/SMARCB1/RAE1/LTBR/ILF3/MVB12A/ISG20/GPX1/PSMA7/YWHAB/RPS3/TFAP4/PC  
KH/HSF2/APP/MYBL1/CETN2/TMEM119/TESMIN/HOXD9/AXL/PRDX4/ANGPT2/MMP19/APOL2/CCT8/  
/PRIM2/APP/PSMD4/CETN2/PSMD3/RBX1/PSMD7/RAD21/BABAM1/MTBP/RFPD3/CEP250/RPA2/CUL  
2/CDK5/CTSS/PDGFA/LAMTOR1/GNS/CD47/S100A13/FTL/NFAM1/FGR/PSMA5/NRAS/TGFB2/SERP1  
S/WAS/SFPQ/PQBP1/PTPN6/PSMD13/IFI16/PSMC4/MUC5B/CASP1/PML/RPL39/SOCS3/IL12RB1/C  
MFHAS1/ICAM2/PSMA3/IRF4/POLR3F/CTSL/IFNG/CTSB/RELA/AIM2/PSMB7/SKP1/HLA-E/NOD1/T  
VDR/LRP8/TACSTD2/SRRT/FAIM/PAX8/ARRB2/CDC42/KAT2A/IL4R/CALR/PRKCI/TGFB3/ZMYND8/  
/PRPF19/BTG2/PSMD8/PIDD1/DNA2/SUSD2/DOT1L/ABL1/PSMA1/TNFAIP3/DCLRE1B/SIPA1/EME2  
8/CSPG4/DBF4B/NF2/CEMIP/TRAF7/CXCL17/PK1A/ABL1/STK24/SFRP2/TNFAIP3/CALM2/PDCD1C  
ZNF335/MFNG/HSPD1/LFNG/ABL1/SART1/HLA-DOA/FCGR2B/TNFAIP3/TOX/CSK/CCND3/BAD/BCL1  
  
/PSMD3/PABPC4/PSMD7/CD8A/LILRB4/AP3D1/RPS19/AXL/FADD/BTK/BABAM1/ZNF675/WDR1/CLE  
I1/POFUT2/MTHFR/HOXA5/VEGFA/CSNK2B/AP2A2/MESP1/KIF20B/SYNE4/PSMC3/TNNC1/TWIST1/S  
TNHA/AP3B1/STXBP1/PDPN/TNFRSF14/IDO1/RUNX3/ZMIZ1/ADORA2B/CCL19/XCL1/PIK3R6/CD5/  
  
T10/HSPA2/SLC25A5/CBFA2T2/TBCD/FCGR2B/STMN2/UBQLN4/NFATC4/TMC8/CSK/ARAP1/TBC1D7  
MCAM/FGR/CXCR3/CCL4/MYADM/WAS/TGFB2/GPSM3/PLXND1/F3/FAM89B/VIL1/ADAMTS9/MAZ/DNA  
N4/PDPN/LGMN/TNFRSF14/HBEGF  
B/PSMD10/GCN1/SMYD3/CDKN2C/C5AR1/CDK7/LRP8/CCND2/RPS3/TFAP4/DUSP12/PARM1/STK10/  
HGDIA/DAP/RIC8A/RGS3/TBC1D10C/RASAL3/MAPT/PDCD6/CYCS/WNT4/TBC1D22A/SSBP1/CCL3/C  
BNL/PTGER4/PRKAA2/PTK2/SPIRE1/CDK2AP2/CCSAP/DCTN1/CAPN2/FBXW5/BICD1/HNRNPU/MAP1  
T2/TMEM216/NSFL1C/BRAT1/PDCD10/STX7/ACTR3/CEP19/VAMP8/CEP41/MILR1/WIPI1/CENPQ/E  
/ACTR1A/LLGL2/VPS4A/NECTIN2/RAB1A/BBS7/CNR1/MYO1C/ATP2A2/SPIRE2/KIF3A/CD59/RAB1  
/WDR1/SEMA3C/GPR183/PMP22/PTPRF/SEMA3E/MAPT/TGIF2/RHEB/NF2/CCL3/CHN1/PRPF19/ZNF

TNB1/SEMA5B/STK25/ABI2/CLEC7A/ARHGDIA/VIM/SCN1B/CSPG5/WDR1/SEMA3C/GPR183/PMP22/  
PARP1/OXCT1/CPSF6/PTPN23/YWHAQ/XPO5/YWHAB/SYT12/ACSL3/CROCC/RIMS3/BARD1/STX18/E  
FR2/SET/THOC6/PSMD10/NES/C5AR1/GPX1/MSH2/ARF4/CCND2/ANXA4/FAIM/DFFA/IL2RB/BARD1  
L/PDCD5/AP3D1/TRAPPC3/STX4/CBL/VRK1/M6PR/STPG1/TIMM50/EPB41L3/BNIP1/ROMO1/LETM1

;/RBX1/PSMD7/IKBKG/UFC1/PELI1/BABAM1/MTBP/CBL/RPL23/RNF4/UBE2L6/RACK1/RFWD3/NOS1  
6/RPL23A/VMP1/CKAP5/OBSCN/HSPB11/MZT1/IQCB1/MRPS7/TRAF7/TMEM216/HPS1/MPV17L2/NF  
A/FNTA/GGA3/HSPA5/TMBIM1/BCL2L1/RPL36/RILPL1/UBA52/RAB11A/ZDHHC23/TSPAN14/RAB29  
STK24/FCGR2B/WRAP53/SFRP2/UBQLN4/PDCD10/BAG2/CHEK2/BAD/DBNL/PSAP/ERP29/HSP90AA1  
I/KRT20/WDR1/NDE1/CLIP3/DRG1/MAPT/CKAP2/ARPC1A/WNT4/EPPK1/CKAP5/NF2/OBSCN/EMILIN  
3/EMB/GRB2/CD6/STK10/CDC42/IL4R/SEMA4D/DNAJB6/PNP/SWAP70/COL8A2/MAPK7/LILRB4/AF  
I/SSX2IP/KLF5/NPHP4/HTT/CAV1/ATP7A/CBY1/DZIP1/CCDC65/ACTR1A/OFD1/PLD1/BBS7/RFX2/  
35/ODF2L/VDAC3/FIG4/MOB2/LLPH/VEGFA/MARK4/LZTS1/HSPA5/DDX56/DEF8/RAB11A/RAB29/I  
BN/PLK3/ZFYVE19/HAUS5/UIMC1/GLI1/DYNC1I2/RAB11A/GPR132/NEDD1/MECP2/CENPJ  
BID/CCNO/PPME1/DYNLT1/GPSM2/HAUS1/BLM/FBXO5/DBF4/TUBB4A/CNOT9/CDKN2B/CCL2/RTKN/  
RA/SETD1A/RASSF2/LILRB1/GNAS/CD80/SOX13/RASGRP1/FGL2/LILRB2/NLRP3/RNF41/L3MBTL1  
F5/VPS11/YWHAG/ATG13/ABHD17A/CLTC  
ID1/F3/FAM89B/VIL1/ADAMTS9/MAZ/DNAJA4/NDRG4/CCR1/CXCL16/PFN1/ABR/NSMF/C5AR1/KIF2

P/NOVA1/SRSF10/SRSF7/PRPF40B/TRA2A/PRMT7/CACTIN/RSRC1/METTTL16/BCAS2/SNRNP35/DDX  
F10/SRSF7/PRPF40B/TRA2A/PRMT7/CACTIN/RSRC1/METTTL16/BCAS2/SNRNP35/DDX46/ZCRB1/PC  
F10/SRSF7/PRPF40B/TRA2A/PRMT7/CACTIN/RSRC1/METTTL16/BCAS2/SNRNP35/DDX46/ZCRB1/PC

SMD7/BTK/GMFG/STX4/CBL/PRDX4/WDR1/CLEC5A/CCT8/TBC1D10C/FCGR3B/HPSE/RAB4B/CCL3/S  
PIK3R6/CD5/IL13RA2/CAV1/TP53BP1/CD84/ATAD5/THOC1/INPP5D/DUSP22/ZNF683/PTPRC/NEC  
/PSMD9/PTK2/PTPN2/CASP8/RPS27A/DMBT1/IL20RB/PAK2/TLR2/MUC6/UBA52/RAB29/MUC15/CA  
F1/HNRNPUL1/CASC3/SNRNP70/COIL/FIP1L1/RBM4B/DHX8/RBM8A/METTTL3/CSTF3/SF3B6/MAGO

B/RAB29/ARHGAP28/PLD2/RUNDC3A/RHOA/RAPGEF1/MRAS/PDPN/RAB27B/DOCK2/MAPKAPK5/HEG1  
I4/RHOA/RPL13A/HNRNPR/POLR2D/ANP32A/RPLP1/DHX9/MAPKAPK5/COA3/MTPN/TNP01/PSMC5/CN

PT1/MRPS27/SPEF1/GABARAP/SCIN/NAPB/MRPS18A/TWF1/MRPL43/CHMP2B/VILL/SMARCE1/CHMF

IY01C/TFIP11/SPIRE2/NCKAP1/PPP1R9A  
MD7/BTK/GMFG/STX4/CBL/PRDX4/CLEC5A/CCT8/TBC1D10C/FCGR3B/HPSE/RAB4B/CCL3/S100A7/  
A/PAFAH1B2/RAB3D/ARPC5/VCP/VCL/APRT/PDAP1/HVCN1/VAMP8/BIN2/RAB5C/DBNL/PSAP/CD33  
I7/RAD21/MTBP/RFWD3/CEP250/RPA2/CUL4B/E2F6/TRIM71/HAUS6/NAE1/NDE1/KHDRBS1/CKAP5/

IP1A/TGFB3/HELLS/CETN2/RAD21/KATNB1/BABAM1/VRK1/RACK1/RALB/HAUS6/GNL3/PARD6G/TIM  
IGF/MAP4K1/CAV1/MAP4K2/DAB2IP/HMGA2/RPTOR/CALM3/EPHB2/CIB1/PKD1/PTPRC/BMP2/CDK5F  
/ACVR1B/CTNNA1/PTPN2/THBS1/CSNK2A1/STYXL1/CASP8/PTPN1/NBN/SRGN/PIAS4/VDAC2/GNAI

;/RBM15/CARHSP1/PAPOLA/HSPA1A/CNOT1/PSMD6/LEO1/AHCYL1/NBAS/PSMC2/SRSF4/PSMA6/NU

PSMB7/KLHL6/PRAM1/SKP1/EIF2B2/CD19/PRKCB/PIK3R2/CLEC4A/VAV3/APPL2/SLA2/WNK1/BTN  
3/RPL13/RBM8A/METTTL3/MAGOHB/HNRNPA0/PSMB1/TNFRSF1B/MOV10/RPL4/RPL41/SMG7/RPL9/F  
HNRNPD/RPS24/ZHX2/PSMA3/DCP2/PYM1/HNRNPC/RPS3A/AGO1/RPL14/RPL10A/FXR1/SYNCRIP/E

IP4A/PSMG2/SMCR8/CLEC16A/SETMAR/RNF41/TAOK1/SLX4/TMSB15A/TPR/PHF23

'A2B1/THUMPD2/RRP15/SMAD2/WDR3/RPS28/RPS17/PTCD1/NOLC1/SMAD3/NOL11/ERI1/DDX1/NSU  
TE24/PPP2R3C/MUL1/ARG2/LILRB1/PDE5A/TSG101/TARDBP/FGL2/MAPKBP1/TAF11/FBXL2/C1QE  
.IG3/PPP2CA/HELB/TNFSF13/XRCC5/SMC1A/ACTR2  
.A-E/SUPT6H/CD19/VAV3/PPP2R3C/SLA2/NOD2/ARG2/TNFSF13/LILRB1/PDE5A/CD80/SOX13/RAS  
TP53/GRIPAP1/GGA2/RPS15A/CHMP4A/RILPL2/RFTN1/SRP72/PEX16  
./GPR132/NEDD1/MECP2/CENPJ  
!/NMT1/FIGNL1/EYA3/PAM16/HYAL2/HTRA2/RELA















.P/SETDB1/RAB22A/TIAM2/RAB3C  
UPT3H/MAP3K12/BAZ1A/TP53/IWS1/PHF20/KAT5/KDM3B/NEK11/SUZ12/MSL3/BAZ1B/SETMAR/NA  
N1  
K/GMFG/CBL/STK25/AKT1S1/WDR91/RACK1/ZNF675/RALB/RGS3/PIFO/IGF1R/MAPT/STK38/RUBC  
:/GDF11/KEL/DENND5A/DBNL/PLXNC1/CTNNA1/SRGAP2/DNM2/PTK2/STYXL1/NOTCH1/TMEM98/FIG  
AR1/IL2RA/CTSS/CD47/PSMB8/NFAM1/TNFSF13B/PSMB10/PHB/FGR/LCP2/PSMA5/CD300LF/NRAS  
4/UBA52/DUSP7/MAP3K10/PIH1D1/DGKQ/CDK5R1/PRKAR1B/TPD52L1/DAXX/RHOA/STK3/RFC5/RA



ZBED2/PKD1/CSNK2A2/BMP2/PAF1/DDB1/RYK/PSMB1/WWTR1/PIN1/CSNK1G1/MOV10/STK4/MAP3K  
7/CDC34/HSP90B1/USP48/UBE4B/AUP1/MAEA/CACUL1/EGF/HSPA13/CAV1/NEDD8/FBXO6/EXOSC2  
/CSNK2A1/VPS35/CASP8/RPL5/RPS27A/CAPN2/FBXW5/USP21/PLK3/MAGEF1/RGP1/MAP1A/BNIP3  
CO2/COX7A2/MX1/NDUFA9/NDUFB11/CNP/POLG2/NDUFA12/DDHD1/NDUF4/PLA2G6/MGME1/THEM



PUS7/RPL5/RPS27A/MRPL18/PLK3/RPS12/JMJD4/SARNP/RPS4X/RPL6/C8orf88/NLN/MAGOH/RPL  
IA4/HSP90AA1/PSMD9/RPL5/RPS27A/FBXW5/MAGEF1/RNF2/RAD18/MED27/MASTL/HSPA5/FBXO45/  
.UP1/MAEA/CACUL1/EGF/HSPA13/CAV1/NEDD8/FBXO6/CSNK2A2/STUB1/ANAPC4/VPS4A/BAG6/HUW  
IC3/VPS37B/USP11/UBE2D2/CHFR/AGAP3/GLMN/RNF8/ANKZF1/FAP/LGMN/TMUB1/PSMC5/FAF1/AF  
.1/CBY1/ZBED2/PKD1/CSNK2A2/BMP2/PAF1/DDB1/RYK/PSMB1/WWTR1/PIN1/CSNK1G1/MOV10/STK  
T1/GMDS/MGAT4A/NAGPA/NME6/SLC26A2/CSPG5/TNIP1/PPCDC/CHST12/TAZ/HACD1/CSPG4/CEMI  
:/PHB/FGR/CCL4/MAPK11/TGFB2/SFPQ/F3/TMEM101/LCK/PTPN6/CD27/CASP1/MAP3K14/MAZ/GSK  
  
HTN1/TSG101/TARDBP/TBPL1/MYH9/CHMP4A

IR1/NFKBIL1/PSMB1/TLR8/MAP3K7/UCN/PSMB6/FFAR2/CNPY3/MFHAS1/PLA2G2A/ICAM2/PSMA3/F  
KS1/DNAAF3/LRRC6/CCDC66/ZMYND10/DNAL1/MNS1/IFT27/YWHAE/TPGS1/RAB23/CCDC13/SPAG1

.IFAP3/DCTN3/NEK8/ALMS1/SCLT1/MKS1/DNAAF3/LRRC6/CCDC66/ZMYND10/DNAL1/MNS1/IFT27/

HSPA13/CAV1/NEDD8/FBXO6/CSNK2A2/STUB1/ANAPC4/VPS4A/BAG6/HUWE1/BBS7/FAF2/TMEM67/  
L2L1/GLI1/MEA1/SSTR2/UBE2Q1/TARBP2/GORASP2/TEX11/IFT20/STXBP1/RNF8/ATP2B4/PRKAG  
/HEXB/MASTL/HSPA5/BCL2L1/GLI1/MEA1/SSTR2/UBE2Q1/TARBP2/GORASP2/NPAS1/TEX11/IFT2  
SPA5/BCL2L1/GLI1/MEA1/SSTR2/UBE2Q1/TARBP2/GORASP2/NPAS1/TEX11/IFT20/RNF8/ATP2B4  
/TP53/IWS1/GRIPAP1/NEFH/TARDBP/FEZ1





'SMYD3/LTBR/C5AR1/LRP8/CCND2/RPS3/DUSP12/PRKD2/ARRB2/STK10/MTCP1/TGFB3/MUC20/SEM



EMILIN1/BRK1/ARPC5/ABL1/GHRHR/NFATC4/ACTR3/ARAP1/TRADD/MAPKAPK3/CCND3/PTBP1/PTF  
;/SPIRE2/ADAMTS2/RPS6/TBC1D20/SMAD5/INSL3/STRBP/TRIM27/NEURL1/DDX20/ING2/IGF2R/G  
;R5/PPM1F/PARD3/PRKAR1B/TWIST1/GLMN/GSKIP/RAPGEF1/YWHAG/MLLT6/ATP2B4/GPS1/PRMT3/

STK10/MTCP1/TGFB3/MUC20/SEMA4D/XCL2/RBPMS/APP/ADRA2A/XRCC6/TMEM119/TELO2/RELL2/  
PTPRC/BMP2/ADCY3/ADNP/PIK3CB/ADCY7/PPP1R9A/LPAR1/STK4/MAP3K7/UCN/CCDC88A/COPS8/



RF/CAPRIN1/RHOA/STXBP1/ENPP2/ROBO3/PDPN/MINK1/NIN/NRTN/SPTAN1/EPHA2/ARTN/IST1/EPYSL3/SNAPIN/AP2A1/IST1/ZC4H2/ARF1/LSM1/SNX3/DAB2IP/PREX1/EPHB2/CIB1/BMP2/CDK5R13/PDPN/MINK1/NIN/NRTN/SPTAN1/EPHA2/ARTN/IST1/DOCK10/NEO1/ATP7A/DAB2IP/EPHB2/SLC46A1/MD1/C5AR1/HLA-B/MSH2/PSMA7/RPS3/PRKD2/TRAF3/PSMB3/GRB2/ARRB2/CDC42/IL4R/MUC20/C

IPSTE24/MPEG1/MUL1/TRIM56/NOD2/ARG2

.S/CACNG4/PI4KB/NECAP2/CLTB/AP2M1/CXCL16/WASF1/VPS28/KCNK9/FOLR2/LYAR/AP2S1/IL15

i/KITLG/EREG/CCL19/PIK3R6/IRAK2/CACUL1/EGF/MAP4K1/MAP4K2/DAB2IP/HMGA2/RPTOR/CALM

DNM1L/SH3GL1/AXL/CBL/CLEC7A/RACK1/M6PR/CSNK1G2/LBP/CLIP3/ARPC1A/RUBCN/ILDR1/RAE  
L1/RPS6KA3/NOLC1/TSC1/PAIP1/RPL22/PDPR/GEMIN5/EIF3C/DDX1/EIF1/ATXN2

MYOF/FGFR2/WASF1/AP2S1/UBE2D1/MST1R/PARP1/ATP6V0C/APH1B/EPH10/LOX/MVB12A/CADM  
SPTAN1/EPHA2/ARTN/IST1/DOCK10/NEO1/ATP7A/DAB2IP/EPHB2/SLC9A6/EPHA10/ARHGAP33/YT

.P1A/OLFM4/VEGFA/RAB3A/ACTN1/LZTS1/FBX045/RILPL1/RAB11A/TUBB3/IFRD1/CDK5R1/METR  
2/GTF3C4/MYB/BRCA2/WDR82/GTF2B/NUP133/SETD5/ATAT1/METTL22/GATA3/KAT7/KANSL1/RAS

.DMD/TRAF3/REG1B/SBNO2/CD6/DROSHA/IL4R/APOBEC3D/CXCL11/CCR5/TLR5/GPATCH3/CARD16/  
PHB2/SLC9A6/EPHA10/ARHGAP33/YTHDF1/ADNP/FEZ2/RYK/PIK3CB/PLXNB2/DPYSL4/KIF3A/FS1  
.DMD/TRAF3/REG1B/SBNO2/CD6/DROSHA/IL4R/APOBEC3D/CXCL11/CCR5/TLR5/GPATCH3/CARD16/  
ATG13/RPL37A/GOSR2/RPLP1/PMM2/RPL32/TNPO1/DMAPI/IP09/RPL30/NXT2/KPNA6/TFDP1/IPC

'AB1B/MAP3K7/STAM/PLEKHM1/CASP3/VPS26A/PIP4K2B/PARK7/USP36/UBQLN2/ULK1/LIX1L/PIK  
.1/BATF3/PF4V1/EXOSC5/GSDMD/TRAF3/REG1B/SBN02/CD6/DROSHA/IL4R/APOBEC3D/CXCL11/CC  
S1/EIF3M/PUS7/RPL5/RPS27A/UGCG/MRPL18/RPS12/JMJD4/SARNP/RPS4X/RPL6/C8orf88/MAGC  
'AB1B/MAP3K7/STAM/PLEKHM1/CASP3/VPS26A/PIP4K2B/PARK7/USP36/UBQLN2/ULK1/LIX1L/PIK

'4A/SLA2/TSC1/BTN3A2/ARG2/TNFSF13/LILRB1/CD80/FGL2/LILRB2/FCGR1B/TFEB/C1QBP/CD8E

EZ1/DPYSL2/NEFL

AIP3/MFF/PDCD10/KCNN4/CSK/BAD/CD33/ERP29/PTGER4/SLC8B1/PSMD9/VPS35/CASP8/PTPN1/



.F2RA/PSMD4/SPRY4/PSMD3/RBX1/MAPK7/RELL2/PPP5C/PSMD7/MAP3K6/IKBKG/DSTYK/STK25/ZN  
'SMA1/TNFAIP3/KCNN4/CSK/ACTR3/MAPKAPK3/PSMB5/BCL10/PSMA4/SPPL3/HSP90AA1/PSMD9/PT  
MB4  
'/RAPGEF1/IFT20/CLTC/AP2B1/PSMC5/RBPJ/CCAR2/AP2A1/MPP2/NPHP4/SNX3/TLE6/BARX1/KLF

:/BLZF1/SEMA4C/RGS4/ADNP2/PTPRS/PRSS2/RPS6KA3/MUL1/PPP2CA/SHTN1/BAP1/SMAD3/UNC13



:A2A/CSF2RA/PSMD4/SPRY4/PSMD3/RBX1/MAPK7/RELL2/PPP5C/PSMD7/MAP3K6/IKBKG/DSTYK/ST













/BAG3/SMARCC1/NUP155/AGO2/APP/ADRA2A/NUP107/SNX12/PSMD4/DNM1L/PSMD3/RBX1/PABPC4

.1/RALB/VIM/DAP/TRIM71/ATP6VOD1/PLEKHN1/PTTG1IP/HNRNPM/MAPT/RUBCN/EXOSC3/RHEB/SU



;/CDK5R1/PPM1F/PPIB/NDUFA13/APBB1/SRF/RHOA/STK3/CD38/SIX1/SOCS7/LGMN/HBEGF/MTPN/  
CD22/RTKN2/THEM4/RNF149/PARK7/RHOH/ING2/MYC/FIGNL1/DYRK3/ARHGAP25/HYAL2/HTRA2/F

D1/SIX1

PPC2L/MMGT1/CLIP3/CHST12/PDCD6/NSF/B4GALNT4/ABCG1/TMEM87B/RHEB/GLG1/MFNG/FUT1/S  
3/THOC2/RBMX/NCAPD3/SRF/TEX11/ACTR5/GATAD2A/DHX9/SMARCA5/RUNX3/DMAP1/CCAR2/POLE  
/ATP6VOC/PSMD1/TMEM63A/KPTN/PADI2/TRAPPC1/BORCS8/GLMP/LUM/DNASE2/CST7/STARD3/VF  
/IRF4/HNRNPC/LRWD1/ING2/MYC/YY1AP1/MBD2/HTRA2/ASF1A/MAX/RELA/NSD1/FAM111A/SUPT6  
N/CHRA1/KMT5A/PRIM1/SSB/EHMT2/BUD31/DCTN5/AKAP8L/SSRP1/ACTB/RBM19/MTA2/WDHD1/N  
RRP36/EIF4A3/C19orf53/ILF3/GORAB/ISG20/KIF2A/S100A16/CCND2/EXOSC5/SNU13/RPS3/GC  
/ATP6VOC/PSMD1/TMEM63A/KPTN/PADI2/TRAPPC1/BORCS8/GLMP/LUM/DNASE2/CST7/STARD3/VF

G15/DRAM2/SLC29A3/GALNS/DSN1/MAP1LC3B/SLC44A2/SLC15A3/AP2S1/OSTM1/BGN/MST1R/UBA  
BCL2L1/RILPL1/DYNC1I2/RAB11A/PLEKHG6/CCDC88C/NEDD1/KIF20B/MECP2/CENPJ/SASS6/PRC  
PIFO/TFAP2A/POLR3H/CKAP2/TTC26/CKAP5/HSPB11/MZT1/IQCB1/EMD/TBCD/RAD51D/PSMA1/NS

2/PDLIM4/FLII/RPS4X/RPL6/VEGFA/ACTN1/PACSIN2/HSPA5/LIMA1/RPL19/PARD3/PPIB/TLN1/  
LR7/STEAP2/IRAK2/PDIA3/SNX3/YIPF1/CAV1/RAB13/SLC9A6/LITAF/VPS4A/SLC9A9/PLD1/KIA  
ATP6VOC/C5AR1/TMEM63A/HLA-B/ATP6VOE1/SYT12/ANXA4/ABCA3/RALA/GRB2/ICA1/STK10/GPF

ARNP/BNIP3L/MAGOH/HSF4/UIMC1/PACSIN2/ARL6IP4/GTF2E2/ZPR1/THOC2/TARBP2/KIF22/DGK

OR1/GNS/CD47/FTL/TCP1/NFAM1/FGR/PSMA5/NRAS/TGFB2/SERPINB6/PTPN6/PSMD13/AGPAT2/C  
1/SYT12/ABCA3/RALA/ICA1/STK10/GPR84/CALR/SYT1/LAIR1/CYSTM1/OCRL/DNM1L/AP1G2/CYE  
PPP1CC/SIRT7/CENPK/NUP43/PML/DYNC1LI1/DSN1/PARP1/UBA1/THOC6/NSMF/SMARCB1/CPSF6/  
ALNT6/GOLGA3/TRAPPC1/LUM/STX18/FUT2/FUT6/ICA1/PARM1/LLGL1/CDC42/PRKCI/PLEKHJ1/M  
3/EEF1A2/RAB3D/VCP/HLA-DOA/NPRL3/ABCY9/STX7/VAMP8/RAB5C/WIP1/PSAP/HSP90AA1/VPS  
7B/AP2B1/LGMN/IFITM3/ATG9A/BECN1/TMEM184A/AP2A1/LRPAP1/VPS33A/TLR7/STEAP2/IRAK2  
1/TBP/SMARCA1/IPO4/MSH6/SAP130/MORF4L1/POLE2/EP400/LDB1/ATR/TP53BP1/SRCAP/THOC  
7/VAMP8/WWC1/BCL10/HSP90AA1/CDK2AP1/DNM2/SPIRE1/TNK2/VPS35/SERHL2/CAPN2/BICD1/F  
NK2/RPL5/NOTCH1/CAPN2/PDLIM4/FLII/RPS4X/RPL6/VEGFA/ACTN1/PACSIN2/HSPA5/LIMA1/RF  
APPC3/SLC35C1/AP1B1/ST3GAL5/POMGNT1/STX4/MGAT4A/NAGPA/STK25/VRK1/ARFIP2/NOSIP/M

XO32/CDK5/FAM83H/CTTN/TCP1/KIFC3/KIF15/HOMER1/WAS/RASSF1/SPECC1/HAUS8/DYNC1LI1/  
XO32/CDK5/FAM83H/CTTN/TCP1/KIFC3/KIF15/HOMER1/WAS/RASSF1/SPECC1/HAUS8/DYNC1LI1/  
PBP2/SRI/CD68/NCKAP1L/SYTL1/ADAM8/CAPN1/LAMP3/CPNE1/C1orf35/CAP1/ASA1/KPNB1/SV  
K5/FAM83H/CTTN/TCP1/KIFC3/KIF15/HOMER1/WAS/RASSF1/SPECC1/HAUS8/DYNC1LI1/MAP1LC3  
RT20/WDR1/CCT8/HAUS6/NDE1/MAPT/CKAP2/EPPK1/CKAP5/KCNAB2/RAB3D/EMD/TBCD/CALM2/AK  
L10/TRIM71/UTP4/RBM17/RPL38/HNRNPM/DRG1/MAPT/MRPL52/SLBP/HNRNPA3/PRPF31/ZMAT5/F

/PTPRC/NECTIN2/SRP68/ADD1/ASAP3/GNA13/RSU1/P4HB/CD59/NCKAP1/CASK/LAYN/RPL4/RPL9  
C/NECTIN2/SRP68/ADD1/ASAP3/GNA13/RSU1/P4HB/CD59/NCKAP1/CASK/LAYN/RPL4/RPL9/PXN/  
HGAP22/PTPRC/NECTIN2/SRP68/ADD1/ASAP3/GNA13/RSU1/P4HB/CD59/NCKAP1/CASK/LAYN/RPL

A7/PXN/KCNC4/CCDC88A/SRA1/SH3RF1/PTPN13/THEM4/ATP2B1/VEZT/MYO1D/ADGRE2/RAB22A/T

PG/ATP11A/EGF/PI4K2A/DAGLB/RPTOR/ATP6V1B2/AP5B1/LITAF/VPS4A/ATRAID/PLD1/KIAA132



MP3/AP2M1/ABCA2/RAB10/PML/SLC29A3/TNFRSF25/SLA/VPS28/CD79A/AP2S1/IL15/UBA1/SNX27/AT  
MYO6/FBXO45/TRIM21/WDR5/TRPC4AP/GTF2E2/VAC14/MORF4L2/TRIM37/CDK5R1/KLHL21/POLR2





KCNAB2/ACHE/RAB3D/TANC2/ABL1/FCGR2B/MFF/PALM/STX7/RNF216/PRR12/DBNL/SGTA/SGAP2

RC1/EIF4ENIF1/BCAS2/TAB1/DDX46/TRIP12/DUSP11/THAP7/SMU1/PRPF40A/FNBP4/AKAP17A/S

PALM/KCNN4/BAG2/DBNL/HSP90AA1/PRKAA2/SRGAP2/DNM2/PTK2/DCTN1/VPS35/CAPN2/PLK3/PT

/EGR2/ING2/SETDB1/MBD2/POLR2B/PRMT6/PHF13/BRD4/ASF1A/RELA/NSD1/MAPK15/LHX2/POLR  
SFMBT2/EDF1/ENY2/TADA3/SRSF2/SIN3B/TRRAP/HSBP1L1/PPARG/JUNB/WWTR1/SUPT7L/MNT/TF  
K2A2/EPHA10/RPS6KC1/SRPK2/STK35/VRK2/ADCK2/CSNK1G1/CASK/STK4/MAP3K7/PSKH1/RIOK1  
1/EFEMP2/RPS15/CTNNA1/RPS16/MRPS15/THBS1/RPL5/RPS27A/MRPL18/BICD1/MYL9/RPS12/MA  
CALM3/ARHGAP27/RIC8B/ARHGAP17/MMP15/LLGL2/BMP2/RALBP1/PITRM1/ARHGAP33/EVI5L/ASA  
CLS1/PSTPIP1/HSPH1/DCTN2/LYN/ARPC5L/FKBP4/MYLIP/ACTB/B9D2/CDK5/CTTN/KIFC3/CORO2  
/MARK4/PAK2/MASTL/CDK11B/CSNK2B/TBRG4/DCK/LMTK2/MAP3K10/SEPHS1/TP53RK/DGKQ/CDK5  
.TP6VOE1/CDK7/MSH2/ARF4/CHD4/RUVBL2/RHEBL1/RBBP4/ABCA3/TTF2/GNL2/RALA/MCM8/PTPA/  
.TP6VOE1/CDK7/MSH2/ARF4/CHD4/RUVBL2/RHEBL1/RBBP4/ABCA3/TTF2/GNL2/RALA/MCM8/PTPA/  
.TP6VOE1/CDK7/MSH2/ARF4/CHD4/RUVBL2/RHEBL1/RBBP4/ABCA3/TTF2/GNL2/RALA/MCM8/PTPA/  
VBL2/RHEBL1/RBBP4/ABCA3/TTF2/GNL2/RALA/MCM8/PTPA/DDX41/NKIRAS2/CDC42/DNAL4/AGAF  
EP250/LDHB/TBL2/TNIP1/PARD6G/PIFO/MAPT/NSF/STK38/RHEB/CSPG4/DBF4B/LIMS1/ACVR1/E  
G/CSK/TRADD/CHEK2/MAPKAPK3/CCND3/BAD/BCL10/HSP90AA1/DNM2/PRKRIP1/PTK2/PTPN2/DCI  
Y05A/VIM/ARFIP2/M6PR/DAP/RAD9A/CEP250/NDE1/HNRNPM/MAPT/NSF/KHDRBS1/CARD18/MED12  
2L3/SPOCK2/SPOCK1/DNAJB2/WAS/GPSM3/SERPINB6/TBC1D13/VIL1/RASA3/CD27/CASP1/MAP3K  
/ADAM17/PTPN1/S1PR3/SH3GLB1/CD177/ADAMTS5/OLFM4/RPL6/ACTN1/PAK2/PACSIN2/HSPA5/L  
SF5/RAPGEF1/IFT20/STXBP5/FNBP1L/DOCK2/WDR41/TNPO1/IP09/SH3BP5L/BECN1/EPS8L1/SGS

/O/BCR/MADD/NOX1/RHOH/TIAM2/ULK1/KNDC1/RAB3IP/SRGAP1/TRIO/IP07/TMEM127/PDE6D/TBC  
F18/NCKAP1/TBC1D20/BCR/MADD/NOX1/RHOH/TIAM2/ULK1/KNDC1/RAB3IP/SRGAP1/TRIO/IP07/

POLR3H/STK38/POLR3C/OBSCN/CCL3/CDK19/ACVR1/PTGES3/FASTK/ABL1/STK24/PIM3/NME7/SF

CDK20/STK3/NEK6/GAK/PRKAG1/MAP3K1/MINK1/MAPKAPK5/PHKA2/GTF2H1/PHKG2/ADCK5/EPHA2







.CTN4/CXXC5/DHX9/NR1H2/ZMIZ1/DMAP1/PSMC5/FAF1/CRTC2/RBPJ/METTL23/TBP/MMS19/CTBP1

N2/GATC/DIS3L2/DDX50/CRCP/METTL8/DDX18/RNASEH2B/POLR1D/TSEN2/POLR2J3/EXO1/TRPT1



EUR1B/MED1/RLIM/XIAP/UHRF2/UBA3/RNF215/FBXW11

SR2/LMO4/USF1/ZIC5/NOTCH1/ZNF711/MBD3/GTF3C5/HNRNPU/STAT5A/HOXA5/SARNP/THRA/HSF

HAUS5/MAP7D3/RAB11A/ZPR1/CCDC88C/TUBB3/EML2/TRIM37/MECP2/CENPJ/CDK5R1/PARD3/SCNENP/RAB35/FGFR1/PIM2/PSME3/SLC9A3R1/BID/CCNO/PPME1/DYNLT1/GPSM2/HAUS1/BLM/FBEMB/CAPZB/VWA1/FGD6/BTBD3/SEMA4B/GRB2/PARD6B/AKIP1/LLGL1/CDC42/LAMB3/ARHGAP18/CITGB8/CLEC5A/TRIM25/POLR3D/LBP/POLR3H/HPSE/POLR3C/CARD18/BTN2A2/CCL3/HSPD1/CXCLXCL17/ABL1/FCGR2B/TNFAIP3/NFATC4/CSK/RNF216/CD33/BCL10/PTGER4/TWSG1/TUSC2/THBS1IF135/AFAP1L2/CD80/DDX1/RASGRP1/LILRB2

ADI2/TRAPPC1/GSDMD/SBN02/STK10/GPR84/CNN2/IL4R/ALDOC/APP/LAIR1/PNP/SWAP70/CYSTMPPC1/GSDMD/SBN02/CST7/STK10/GPR84/CNN2/IL4R/ALDOC/APP/LAIR1/PNP/CYSTM1/XRCC6/PSCCL3/S100A7/KCNAB2/GCA/PAFAH1B2/RAB3D/ARPC5/VCP/VCL/APRT/PDAP1/HVCN1/VAMP8/MILF1/HSP90AA1/CD177/MAN2B1/OLFM4/CYB5R3/GLIPR1/RAB3A/HEXB/TLR2/CSNK2B/TMBIM1/SLC15AADI2/TRAPPC1/GSDMD/SBN02/STK10/GPR84/CNN2/IL4R/ALDOC/LAIR1/PNP/SWAP70/CYSTM1/XFGALNS/DSN1/IL12RB1/SLC44A2/IMPDH2/ABR/ATP6VOC/PSMD11/PSMD1/C5AR1/TMEM63A/HLA-B\*35C/DBNL/PSAP/CD33/HSP90AA1/TUSC2/ADAM17/CD177/MAN2B1/OLFM4/CYB5R3/GLIPR1/RAB3A/ID1/RPS19/AXL/FADD/BTK/BABAM1/ZNF675/WDR1/XRCC4/CLEC5A/DPF2/GPR183/WNT4/TAZ/EXO5AK1/CCR2/FZD9/DOCK11/CD19/POU2F2/GON4L/PPP2R3C/ESRRA/TSC1/RPL22/RASSF2/LILRB1/F11/SLC11A1/HSPH1/JAG1/CD209/LYN/HLA-DRB5/CARD11/GPRC5B/FPR3/MUC3A/RAC1/CBFB/ITGA1/STOML2/WIPF2/CD79B/CD38/RAPGEF1/MAP3K1/LGMN/ELMO2/PSMC5/UBE2N/CD247/TLR7/HSP9CPL2/SLA2/WNK1/BTN3A2/EIF2B3/ACTR2/IKKB/LILRB1/LILRB2/FCGR1B/RFTN1/NCKIPSD/BTNIPOLE4/RPS3/RBBP4/POLA1/USP1/PRKD2/DFFA/BARD1/UBE2A/DNASE2/ARRB2/MCM8/PARM1/POLFMSH6/MORF4L1/POLE2/ATR/TP53BP1/HMGA2/PARP10/DCLRE1C/PAGR1/FBXO6/ERCC3/CIB1/MMS2R5/MLLT6/RNF8/SART3/PRMT3/ANP32B/DNMT3B/SMARCA5/DNAJC2/COPRS/ZMIZ1/DMAP1/CRTC2/ITP6/HEATR1/SART1/SYMPK/PHF5A/NOP10/KRI1/FAM98B/SCAF1/RPS7/SRPK1/RPL7A/WDR55/GAF1/RPLP1/DHX9/MAPKAPK5/COA3/RPL32/MTPN/RPL30/CNOT10/YARS2/MEX3D/MRPL15/C12orf65/IRAC1/MAGED2/CDK5/CTSS/PDGFA/LAMTOR1/GNS/CD47/S100A13/FTL/NFAM1/FGR/PSMA5/NRAS/

BAM1/CBL/ZBTB40/UBE2L6/RFWD3/MSX1/NABP1/RAD9A/XRCC4/OGG1/RPA2/CUL4B/PPP4C/RBM17TNB1/WRAP73/RNF4/IGBP1/COPG1/CCDC120/CEP250/HAUS6/PARD6G/NDE1/CLIP3/DRG1/MAPT/EIPA2/CUL4B/HAUS6/NAE1/NDE1/ZWILCH/DRG1/CKAP5/DBF4B/BTN2A2/MEIS2/RAD51C/BTG2/PSMIAAR1/TIPIN/TNFSF12/MATK/CCND2/RPS3/PRKD2/REG1B/UBE2A/CD6/CALR/PRKCI/TGFB3/PRRX1/ID/PRMT5/SNRNP200/RBM22/DDX20/GEMIN8/U2SURP/HNRNPC/THOC3/SREK1IP1/POLR2B/BUD13/CUL/UGGT1/UGGT2/FBXL18/FBXL2/CDC16/KAT5/UBE2R2/RAD23A/SVIP/DVL1/DERL3/CLEC16A/RNF43/CDC42/KAT2A/ZNF207/CBX5/CHMP1A/CALR/TOPBP1/RANBP1/APP/PSMD4/CETN2/PCGF2/MED2EPIH1D1/MECP2/CENPJ/CDC37/CDK5R1/HNRNPA1/PPM1F/STOML2/DSTN/RHOA/PPLHN1/VPS11/YWIFEF3/CTNNA1/DNM2/TNFSF15/PTPN2/THBS1/STYXL1/CASP8/NOTCH1/PDCD2/RPS27A/CAPN2/SFRFA/GRK2/APOBEC3D/CPSF4/RPL35/RANBP1/RPS20/CCR5/NUP107/POLR2K/XRCC6/RPL18A/RBX1/FGSPT2/SART1/SYMPK/PHF5A/PSMA1/SCAF1/RPS7/SRPK1/RPL7A/RPS23/MYEF2/RPS10/RBM42/CFKAT5/KDM3B/NEK11/SUZ12/MSL3/BAZ1B/SETMAR/NACC2/MEN1/ARRB1/RNF40/EZH1/MCM3AP/OGISG20/HLA-B\*IL1R2/TNFSF12/PADI2/PSMA7/LRP8/PF4V1/traf3/PSMB3/IL2RB/RALA/GRB2/CNNAR/MRPL15/BECN1/C12orf65/SNAPIN/MRPL4/IST1/VPS33A/ATG7/HTT/HAX1/CAV1/GRWD1/CAMCSURF6/PELP1/RPS9/WDR46/IMP4/EIF3G/ATR/RBFA/RPS14/RPS27/EXOSC2/EIF2D/GEMIN2/SRSF7/TRPM4/EPB41L1/GMFG/ABI2/MYO5A/ARHGDIA/VIM/ARFIP2/SCN1B/WDR1/EPB41L3/FMNL3/SEM55/ACTR1A/OFD1/PLD1/BBS7/RFX2/CCDC40/EVI5L/TMEM67/CEP72/WWTR1/KIF3A/NCKAP1/PPP1F/WNT4/NF2/OBSCN/BRK1/ARPC5/ABL1/ACTR3/ARAP1/DBNL/PTGER4/SPIRE1/PTPN1/SSH2/INPPIANAB2/MEIS2/MFNG/ESCO2/PSMD8/LFNG/RARG/ABL1/SART1/HLA-DOA/FCGR2B/PSMA1/SFRP2/TO

ADD/PELI1/STX4/ANGPT2/ARHGDIA/CSPG5/RASAL3/SEMA3E/WNT4/NF2/BTN2A2/EMILIN1/HSPD1IP1/SGSH/PRPF19/UBXN1/GGA1/PSMD8/EEF1A2/KLHL42/VCP/PSMA1/ATG4B/TNFAIP3/USP5/NSFIALR/ZMYND8/SEMA4D/XCL2/CMKLR1/APP/ADRA2A/SWAP70/DPEP1/SEMA4F/FADD/ECM1/STX4/SEM1/APP/DNM1L/MAPK7/SYT3/SEMA4F/GDPD5/KATNB1/SEMA5B/STK25/ABI2/ARHGDIA/VIM/SCN1B/

56/DEF8/RAB11A/RAB29/IFRD1/CENPJ/PACSN1/PPP2R5B/CDK5R1/METR1/APBB1/SRF/CAPRIN1  
HL/WSB1/PSMA1/TNFAIP3/USP5/RPS7/FOXF2/BAG2/TBC1D7/RNF216/PSMB5/BCL10/PSMA4/HSPC  
/OXCT1/PTPN23/IL1R2/YWHAQ/XPO5/YWHAB/ANXA4/GSDMD/ACSL3/CROCC/BARD1/BAG3/ICA1/II  
GPA/TMEM107/MSX1/M6PR/TIMM50/CEP250/RPA2/CCT8/ROMO1/GNL3/RPL38/PTTG1IP/MAPT/TTC  
5J/AP2S1/TUBG2/PARP1/SET/PSMD10/PSMD11/SMARCB1/SMYD3/CPSF6/CDK7/GRB7/RUVBL2/PRF  
MD9/RPS16/RPL5/RPS27A/HNRNPU/RPS12/RPS4X/RPL6/PFKFB2/EXOSC9/EXOSC10/MAGOH/RPL37  
9/DPH3/UTP23/RPP30/SUV39H1/POLR2E/PRKRA/PELP1/RPS9/WDR46/SND1/IMP4/KHSRP/DALRD  
B/APRT/PDAP1/HVCN1/VAMP8/BIN2/RAB5C/DBNL/PSAP/CD33/HSP90AA1/CD177/MAN2B1/OLFM4/  
MAZ/DNAJA4/NDRG4/PML/CCR1/TUBB2B/CXCL16/PFN1/ABR/USP14/NSMF/C5AR1/KIF2A/PTPN23/  
2/EGF/CAV1/ATP7A/TMEM102/DAB2IP/PREX1/CIB1/PTPRC/VPS4A/BMP2

P1/HVCN1/VAMP8/BIN2/RAB5C/DBNL/PSAP/CD33/HSP90AA1/CD177/MAN2B1/OLFM4/CYB5R3/GLI

:/MRPL51/MRPL11/RPLP1/DHX9/MAPKAPK5/COA3/RPL32/MTPN/RPL30/CNOT10/YARS2/MEX3D/MRF  
PN2/SFRP4/TOMM22/PIAS4/HOXA5/IRF5/ARHGEF11/BNIP3L/PAK2/USP27X/BCL2L1/UBA52/MAPC  
DIA/MSX1/OGG1/CLEC5A/BNIP1/PTTG1IP/IGF1R/TFAP2A/WNT4/PELI3/HSPD1/ANKLE2/BTG2/GF  
PN2/SFRP4/TOMM22/PIAS4/HOXA5/IRF5/ARHGEF11/BNIP3L/MARK4/PAK2/USP27X/BCL2L1/UBA  
3L/IGBP1/ARHGDIA/MSX1/OGG1/CLEC5A/BNIP1/PTTG1IP/IGF1R/TFAP2A/WNT4/PELI3/HSPD1/AN  
DC26/SOCS5/KLHL22/ANAPC1/PCBP2/DNAJC18/UBXN2A/ZFAND2B/UBE2K/PSME2

8/SEMA4D/APP/DNAJB6/SWAP70/CDC42EP2/MED25/DNM1L/RBX1/PIP4K2C/GMFG/DR1/WRAP73/RN  
STUB1/VPS4A/KIAA1324/BIK/ADNP/DBB1/MYO1C/SPIRE2/NCKAP1/LPAR1/ADGRL1/PXN/STAM/PI  
RB2/POLR2L/NUP155/CDC42/KAT2A/VPS18/CBX5/CHMP1A/GRK2/APOBEC3D/CPSF4/RPL35/RANBF  
LA1/GSDMD/PSMB3/IL2RB/REG1B/RPL27/GRB2/POLR2L/NUP155/CDC42/KAT2A/VPS18/CBX5/CH  
KHDRBS1/HPGDS/TTC26/WNT4/VMP1/SOHLH2/PIWIL4/HSPB11/PLCD4/RAD51C/PAFAH1B2/ACVR1/  
4B/E2F6/TRIM71/HAUS6/NAE1/TIMELESS/NDE1/SLBP/KHDRBS1/CKAP5/DBF4B/BTN2A2/RAD51C/  
NB6/PTPN6/PSMD13/AGPAT2/COMMD9/RAB10/DYNC1LI1/GALNS/DSN1/SLC44A2/IMPDH2/ABR/ATF  
OCH/CXCL16/UBE2D1/MST1R/USP14/PSMD10/PSMD11/PSMD1/ISG20/HLA-B/PSMA7/LRP8/GSDMD/  
RIM15/NLRC4/BPIFB1/PTPRS/CLEC4A/APPL2/RPS6KA3/TLR1/S100A1/MUL1/NOD2/XRCC5/IKBKE  
SEMA4D/SYT1/CMKLR1/PNP/TMEM119/DNM1L/TRPM4/SYT3/GDPD5/LILRB4/AP3D1/KATNB1/AXL/F  
:/CHEK2/CLSPN/PSMB5/RAD1/SGSM3/PSMA4/PRKAA2/VASH1/PSMD9/THBS1/CDK2AP2/NOTCH1/NBN  
)/CSK/CLSPN/MAPKAPK3/CCND3/DBNL/ERP29/HSP90AA1/TNFSF15/PRKRIP1/PTK2/PTPN2/THBS1/  
0/PTGER4/VCAM1/TWSG1/TUSC2/PTPN2/ADAM17/CASP8/NBN/TMEM98/ERCC1/IL20RB/PAK2/HLA-

C5A/DPF2/GPR183/WNT4/TAZ/BTN2A2/CCL3/KCNAB2/MEIS2/MFNG/ESCO2/PSMD8/LFNG/RARG/AF  
RF/CC2D2A/RHOA/STK3/GLMN/IFT20/CLTC/SIX1/PDPN/AP2B1/HBEGF/HEG1/PSMC5/RBPJ/CRYGS  
IL13RA2/CAV1/TP53BP1/CD84/ATAD5/THOC1/INPP5D/DUSP22/ZNF683/PTPRC/NECTIN2/CRLF2/

/RAD1/DENND5A/PTGER4/DNM2/LMO4/PTK2/THBS1/STYXL1/VPS35/NOTCH1/ODF2L/NBN/HNRNPU/  
JA4/NDRG4/CCR1/TUBB2B/CXCL16/PFN1/ABR/NSMF/C5AR1/KIF2A/PTPN23/CADM4/PADI2/ABI3/

MTCP1/TGFB3/MUC20/VPS25/APP/ADRA2A/DCUN1D5/XRCC6/HMGN1/SPRY4/DNM1L/TELO2/MAP3K6  
HN1/MTCH1/HSPD1/CHTOP/LIMS1/PIDD1/HSPA2/TBCD/VCP/NPRL3/RASAL1/SFRP2/CALM2/SIPA1  
A/MARK4/ADD3/LIMA1/CD2AP/EML2/TRIM37/MECP2/CENPJ/CDK5R1/ARHGAP28/PPM1F/RBM14/DS  
OD1/COPG2/HSP90AA1/RPS15/DNM2/C12orf4/PTK2/SPIRE1/DCTN1/VPS45/CEP164/HAUS7/CFTF  
B/CASK/TBC1D20/LRPPRC/CDC23/SYT11/KIF5B/ADGRE2/TRIM46/MAPK15/TERF1/VAMP1/TFG/CF  
335/RARG/CBFA2T2/ABL1/STK24/STMN2/RASAL1/SFRP2/THBS2/NFATC4/GDF11/KEL/DENND5A/I

PTPRF/SEMA3E/MAPT/TGIF2/RHEB/NF2/CCL3/CHN1/PRPF19/ZNF335/LIMS1/CBFA2T2/ABL1/STK  
AG3/PARD6B/IL4R/VPS18/PRKCI/CXCL11/ZMYND8/SYT1/ADRA2A/SNX12/GZMB/DNM1L/TRPM4/SF  
/CIAPIN1/PAX8/BAG3/ARRB2/PRKCI/TGFB3/CCR5/SEMA4D/DNAJB6/DPEP1/PCGF2/MAPK7/PPP5C  
/TRAPPC2L/PDCD6/ARPC1A/NSF/TAZ/GCA/MTCH1/ANKLE2/SEC13/ARPC5/RHOT2/SLC25A5/EMD/F

P/RNF7/CUL4B/TRIM71/GNL3/TNIP1/NAE1/INO80C/TRIM25/ZNF598/UBE20/PTTG1IP/RNF122/IRL3/ATG4B/NSFL1C/STX7/ACTR3/RPS23/CEP19/RPS10/CHEK2/TBC1D7/CEP41/BIN2/IFT172/WI1)/GOLPH3L/CACNB3/PACIN1/TIMM10/GORASP2/CDK5R1/RPL19/VPS37B/PARD3/NDUFA13/RPS11/.VASH1/SGTA/HDAC10/PTPN2/SPIRE1/PTPN1/CHCHD2/FUT8/MAGEF1/PIAS4/ERCC1/VEGFA/UIMC11/MZT1/BRK1/COL11A1/ARPC5/ABL1/TBCD/STMN2/SFRP2/ACTR3/ARAP1/IFT172/DBNL/HOOK2/F3D1/FADD/PELI1/RIC8A/TNIP1/RASAL3/PTPRF/WNT4/VMP1/NF2/BTN2A2/HSPD1/LIMS1/ACVR1/CCDC40/EVI5L/TMEM67/CEP72/WWTR1/KIF3A/NCKAP1/PPP1R9A/LPAR1/PLEKHM1/ARMC9/CCDC88FRD1/CENPJ/PACIN1/PPP2R5B/CDK5R1/METRNL/APBB1/SRF/CAPRIN1/RHOA/CD38/RAPGEF1/IFT

DAPK3/CSNK1D/ANAPC7/CDK2/LSM10/KIF14/KPNB1/SMC4/NASP/DCTN2/KNSTRN/LIG1/PRIM1/CI/PSMD12/PURB/IL12A/ZBTB7B/ROR2/PRDM1/SOCS5/STAT3/KMT2A/SCIN/PSME2/RBM15/MYB/PRI

A/PTPN23/CADM4/PADI2/ABI3/GRB7/TACSTD2/PRKD2/SEMA4B/PARD6B/SYDE1/STK10/AGO2/ARI

46/ZCRB1/PCBP2/PSIP1/SMU1/AAR2/PRPF40A/XAB2/SYF2/RBM15/PTBP2/SNUPN/HNRNPH1/CWC1BP2/PSIP1/SMU1/AAR2/PRPF40A/XAB2/SYF2/RBM15/PTBP2/SNUPN/HNRNPH1/CWC15/WDR83/PAFBP2/PSIP1/SMU1/AAR2/PRPF40A/XAB2/SYF2/RBM15/PTBP2/SNUPN/HNRNPH1/CWC15/WDR83/PAF

100A7/KCNAB2/GCA/PAFAH1B2/RAB3D/ARPC5/VCP/VCL/FCGR2B/APRT/PDAP1/HVCN1/VAMP8/MIL1/TIN2/CRLF2/IKZF3/CNR1/METTL3/LOXL3/DOCK8/TNFRSF1B/NFKBID/CASP3/CLPTM1/CD22/BCR/CNB3/PLD2/PSMC3/UBE2D2/STOML2/WIPF2/CD79B/CD38/RAPGEF1/MAP3K1/LGMN/ELMO2/PSMC5/IB/SNRPD3/PRPF38B/HNRNPA0/ZNF473/ACIN1/TFIP11/CELF2/IK/RPRD1A/PPP1R8/ADAR/POLDIF

/IFT22/EPS8L1/KITLG/KSR1/SSX2IP/NOTCH2/RHOBTB2/RAB9A/DOCK10/RAB40C/RAB13/DAB2IFTOT10/RBM10/MEX3D/SEH1L/RBM24/DPH3/EIF6/EIF4G2/EIF4G3/CNOT3/POLR2E/PRKRA/RPS9/KI

2A/MRPS9/SMARCC2/MRPL50/CHMP7/EPS8/SNX14/CHMP5/GLE1/MTRF1L/MRPS35/MRPS33/MID1/M

KCNAB2/GCA/PAFAH1B2/RAB3D/ARPC5/VCP/VCL/FCGR2B/APRT/PDAP1/HVCN1/VAMP8/MILR1/BIN1/HSP90AA1/CD177/MAN2B1/OLFM4/CYB5R3/GLIPR1/RAB3A/HEXB/TLR2/CSNK2B/TMBIM1/SLC15/DBF4B/BTN2A2/RAD51C/BTG2/PSMD8/ACVR1/TAF10/PIDD1/HSPA2/PKIA/PSMA1/MTA3/CHEK2/CI

IELESS/NDE1/ZWILCH/CKAP2/CKAP5/ANKLE2/SUSD2/KLHL42/SFRP2/KDF1/CALM2/AKNA/ACTR3/CIAP1

3/PTPMT1/BNIP3L/PAK2/TMEM109/TNFRSF25/TMBIM1/TXNDC12/IVNS1ABP/BCL2L1/PIH1D1/MEI

IT21/RBM4

I3A2/EIF2B3/ACTR2/IKBKB

PS6/PPP1R8/RPL24/PSMB6/GTPBP1/LRPPRC/RPL11/RPL10/HNRNPD/RPS24/ZHX2/PSMA3/DCP2/IFI4G1/PSMB7/CNOT2/RPL12/RPS18/RPS28/ELAVL1/FASTKD1/RPS17/PNPT1/SERBP1/NUP214/PF

IN5P2/METTL2B/ZNHIT6/AARS2/TSR1/METTL6/GRSF1/RPP38/PARN/MRPS11/THUMPD3/QTTRT2/WDF

3P/RAD23A

5GRP1/FGL2/LILRB2/NLRP3/RNF41/TICAM1/CD40/TNFSF18/CLECL1/IL12A/WNT3A/ZBTB7B/PRDM















iCC2/MEN1/ARRB1/RNF40/EZH1/MCM3AP/OGT/KANSL2/PRMT7/ZBTB7B/BRD8/WDR70/TRIP12/MSL1

N/CSPG4/DBF4B/NF2/CEMIP/TRAF7/EEF1A2/CXCL17/PKIA/ABL1/STK24/SFRP2/TNFAIP3/CALM2  
i4/MOB2/LLPH/VEGFA/TLR2/LZTS1/HSPA5/DDX56/RAB11A/RAB29/KIF20B/IFRD1/PACSIN1/NOTC

;/WAS/TGFB2/SFPQ/PQBP1/LCK/PTPN6/PSMD13/IFI16/PSMC4/MUC5B/SAMSN1/SOCS3/IL12RB1/C  
iPGEF1/ATG13/ATP2B4/PRKAG1/PIK3R5/MAP3K1/MINK1/RPLP1/MAPKAPK5/TIGAR/ADCY6/ADORA2





7/KREMEN2/PSMB6/VPS26A/NXN/PFDN5/PSMA3/PDE6G/AGO1/MBD2/BRD7/CELSR3/LYPD6/BCL7B/  
2/CSNK2A2/STUB1/ANAPC4/VPS4A/BAG6/HUWE1/BBS7/FAF2/TMEM67/DDB1/FBXO44/SKP2/PSMB1/  
3L/USP27X/HSPA5/FBXO45/UBA52/CD2AP/AP2A2/EDEM2/TRPC4AP/PCYOX1L/RNF213/PSMC3/VPS3  
I4/COA4/PPRC1/PARK7/IMMP1L/TIMM9/SLC25A36/TIMM22/USP36/NMT1/PAM16/HTRA2/WDR45/AF

.37/RPL27A/RCC1L/COPS5/GGA3/WARS2/EIF1AD/RPL36/UBA52/HSPA14/NANOS1/ATP6AP2/TARBF  
'TRIM21/IVNS1ABP/LRR1/UBA52/TRPC4AP/UBE2Q1/TRIM37/RNF213/RNF25/UBR5/PSMC3/KLHL21  
/E1/BBS7/FAF2/TMEM67/DDB1/FBX044/SKP2/PSMB1/WWTR1/SUMO2/USP3/FBX010/TRIM32/PSMB6  
'RDC1/CCAR2/CTSW/SDF2L1/FBXL7/UBE2N/ANAPC5/HECTD3/CDC27/CDC34/HSP90B1/USP48/UBE4  
'4/MAP3K7/KREMEN2/PSMB6/VPS26A/NXN/PFDN5/PSMA3/PDE6G/AGO1/MBD2/BRD7/CELSR3/LYPD6  
.P/MFNG/FUT1/SEC13/LFNG/EXT1/VCP/APRT/DHDDS/NME7/AMDHD2/ACOT8/PRKAA2/B4GALNT2/NE  
'3A/NDRG4/CCR1/SOCS3/TNFR1/FGFR2/DVL2/SLC44A2/MST1R/IL15/LTBR/C5AR1/GPX1/RPS3/PRK

'ARK7/IRF4/POLR3F/CTSL/HYAL2/CTSB/RELA/AIM2/PSMB7/CCR2/SKP1/HLA-E/NOD1/TRIM15/NL  
.6/BBIP1/PARVA/WDR35/TCTN3/WDR90/SDCCAG8/POC1B/STK36/NUDCD3/KIF3B/ARL13B/AHI1/AI

'YWHAE/TPGS1/RAB23/CCDC13/SPAG16/BBIP1/PARVA/WDR35/TCTN3/WDR90/SDCCAG8/POC1B/STK

'DDB1/FBX044/SKP2/PSMB1/WWTR1/SUMO2/USP3/FBX010/TRIM32/PSMB6/RPL11/CDC23/KLHL25/  
;1/ZMIZ1/SPATA24/DEDD/TBP/ERE/MORN2/CDYL/SPATA2/RNF114/DKKL1/DZIP1/CIB1/SIX5/CS  
!0/RNF8/ATP2B4/PPAT/PRKAG1/ZMIZ1/SPATA24/CYP27B1/DEDD/TBP/ERE/MORN2/KPNA6/CDYL/  
!/PPAT/PRKAG1/ZMIZ1/SPATA24/CYP27B1/DEDD/TBP/ERE/MORN2/KPNA6/CDYL/SPATA2/RNF114





IA4D/XCL2/RBPMS/APP/ADRA2A/XRCC6/TMEM119/TELO2/RELL2/MAP3K6/IKBKG/DSTYK/STK25/BC



'N12/HSP90AA1/PTK2/PTPN2/THBS1/ADAM17/PTPN1/STAT5A/VEGFA/PAK2/SREBF1/LMTK2/AP2A2  
;MCL1/DUSP13/FIGNL1/NPHP1/SPIN4/NR6A1  
'DNMT3B/HEG1/TIPRL/SH3BP5L/MECOM/CTBP1/CDYL/STRAP/PPP1R14C/GMFB/DUSP18/CAV1/DAB2



'MAP3K6/IKBKG/DSTYK/STK25/BCAR3/RACK1/RALB/GPR183/IGF1R/CLIP3/CSPG4/DBF4B/CCL3/5  
'NAB2/MADD/NEURL1/PARK7/PDE6G/SLC27A1/CD4/JTB/IFNG/MAP3K9/NOD1/MAP4K4/MAP3K11/PF

MOCK10/NEO1/ATP7A/DAB2IP/EPHB2/SLC9A6/EPHA10/NECTIN2/ARHGAP33/YTHDF1/ADNP/FEZ2/F  
AP1/ARHGAP33/YTHDF1/ADNP/CNR1/RYK/PLXNB2/FSTL4/MOV10/PPP1R9A/LPAR1/TRIM32/CCDC8  
9A6/EPHA10/ARHGAP33/YTHDF1/ADNP/FEZ2/RYK/PIK3CB/PLXNB2/DPYSL4/KIF3A/FSTL4/NCKAF  
MKLR1/TLR5/PSMD4/HK1/XRCC6/GPATCH3/PSMD3/PSMD7/LILRB4/RPS19/IKBK/ADD/BTK/PELI

i/SIGLEC1/ABR/EPS15L1/LRP8/CDC42SE1/LDLRAD3/IL2RB/GRB2/ARRB2/CD6/CDC42/SLC12A7/C  
I3/CIB1/PKD1/BORA/PTPRC/BMP2/ADCY3/ZNF16/ADNP/PIK3CB/ADCY7/PPP1R9A/LPAR1/STK4/M

34B/ACHE/BRK1/ARPC5/SUSD2/ABL1/FCGR2B/IL10RA/CSK/ACTR3/RUFY1/MAPKAPK3/BIN2/RAB5C

I4/ATP6V0E1/ARF4/MATK/GRB7/NCOA5/PRKD2/SMARCC1/PTPRE/GRB2/ARRB2/COL4A2/POLR2L/CI  
HDF1/ADNP/FEZ2/RYK/PIK3CB/PLXNB2/DPYSL4/KIF3A/FSTL4/NCKAP1/PLCG1/MOV10/PPP1R9A/

I/PARD3/APBB1/SRF/CAPRIN1/RHOA/STXBP1/ROBO3/ACTN4/PDPN/MINK1/HEG1/NIN/NRTN/SPTAN  
;D2/GNL3L/BLOC1S1/SETD1B/KDM6A/PIAS2/NAT8B/SIRT2/NCOA3/NUP35/RBBP5/FLCN/RWDD3/RI

'RPS19/IKBKG/AXL/FADD/BTK/PELI1/GZMA/CLEC7A/VIM/CSF2RB/ROM01/TRIM25/POLR3D/LBP/F  
'L4/NCKAP1/PLCG1/MOV10/PPP1R9A/CNP/NCAM1/RPL24/ETV1/SEMA3F/MEGF8/EGR2/ULK1/MNX1/  
'RPS19/IKBKG/AXL/FADD/BTK/PELI1/GZMA/CLEC7A/VIM/CSF2RB/ROM01/TRIM25/POLR3D/LBP/F  
'4/PEX10/RPS9/HAX1/RPS14/CALM3/RPS27/CSNK2A2/NUDT19/PARL/RPL29/TIMM23/VPS4A/TIMM

3C2B/HTRA2/IFNG/WDR45/TLK2/MAPK15/ATP6V0A1/EIF4G1/TMEM208/TBC1D25/SESN2/NOD1/A1  
R5/TLR5/GPATCH3/CARD16/RPS19/IKBKG/AXL/FADD/BTK/PELI1/GZMA/CLEC7A/VIM/CSF2RB/RC  
H/RPL37/RPL27A/RCC1L/COPS5/WARS2/EIF1AD/RPL36/UBA52/HSPA14/NANOS1/TARBP2/ETF1/F  
3C2B/HTRA2/IFNG/WDR45/TLK2/MAPK15/ATP6V0A1/EIF4G1/TMEM208/TBC1D25/SESN2/NOD1/A1

3/RFTN1/BTNL8/MCOLN1/TNFRSF17/NLRP3/CD40/PPP3CB/TNFSF18/GNL1/IL12A/ZBTB7B/SLAMF1





'SRGN/CFTR/PLK3/SH3GLB1/MAVS/PFKFB2/BNIP3L/PLA2G1B/TLR2/SREBF1/CD2AP/EDEM2/RAB11

IF675/IGBP1/RGS3/CSF2RB/TNIP1/RASAL3/GPR183/IGF1R/STK38/CSPG4/NF2/BTN2A2/CCL3/S1  
K2/PTPN2/CASP8/RPS27A/MAVS/DMBT1/PAK2/TLR2/MUC6/UBA52/RAB29/MUC15/CACNB3/PLD2/F  
IL12/EGF/CAV1/LDB1/DAB2IP/DKKL1/CBY1/ZBED2/PKD1/CSNK2A2/BMP2/PAF1/DDB1/RYK/PSMB1

IA/TTL/TSG101/TP53/BCL11A/DPYSL2



K25/ZNF675/IGBP1/RGS3/CSF2RB/TNIP1/RASAL3/GPR183/IGF1R/STK38/CSPG4/NF2/BTN2A2/C













l/UQCC2/PSMD7/IKBKG/PIP4K2C/RPL23/WDR91/RACK1/RALB/VIM/DAP/HCAR2/CUL4B/TRIM71/A1

JPT5H/UBXN1/BTG2/PAFAH1B2/SEC13/PSMD8/EEF1A2/ABL1/VCP/IL10RA/PSMA1/NPRL3/TNFAIP3



'DMAP1/RBPJ/CCAR2/CYP27B1/IST1/EIF4G2/NOTCH2/CDK11A/OSM/MORF4L1/OGFR/DAB2IP/HMG/  
'ELA/TMEM127/SESN2/DUSP14/RGS4/PIK3R2/KCTD13/TMEM161A/SLA2/C3orf33/MUL1/TSC1/PPF



SEC13/LFNG/EXT1/LPCAT2/PDCD10/APOO/ARAP1/DENND5A/WIP1/DBNL/COPG2/B4GALNT2/DNM2/  
RPA1/PMF1/TBP/SMARCA1/IP04/SUV39H1/MSH6/SAP130/SMC2/MORF4L1/POLE2/EP400/LDB1  
S18/CTSD/AP3D1/AP1B1/BTK/CBL/CCZ1/MYO5A/ABCC10/M6PR/CSPG5/TMEM199/CCT8/GNB4/ATF  
H/KDM3A/MBD1/SMAD2/WBP2/SMAD3/MYC/SETD1A/MAU2/MAEL/BAZ1A/TP53/INO80E/TARDBP/K  
ICAPH2/TCP1/CDCA2/CENPI/LOXL2/WAS/SWI5/SFPQ/DNMT3A/THOC5/PUM3/NUP85/BANF1/PPP1CC  
LGA3/POLA1/GNL2/CIAPIN1/NCL/SDHAF2/FTSJ3/GRB2/SPATS2L/POLR2L/ZNF354A/DROSHA/VCS  
S18/CTSD/AP3D1/AP1B1/BTK/CBL/CCZ1/MYO5A/ABCC10/M6PR/CSPG5/TMEM199/CCT8/GNB4/ATF

1/ATP6VOC/PSMD1/TMEM63A/KPTN/PADI2/YWHAB/SLC22A17/TRAPPC1/BORCS8/GLMP/LUM/DNASE  
CR/NEK6/IFT20/B9D1/DHX9/NIN/IFT22/PSEN2/FBXL7/IST1/CDC27/SSX2IP/UXT/NPHP4/SPOU1  
FL1C/DCLRE1B/RPS7/CALM2/AKNA/NME7/CEP19/TBC1D7/CEP41/TXNDC9/PSMB5/IFT172/HOOK2/

RPS11/PROCR/RHOA/RPL13A/YWHAG/CLTC/GAK/ACTN4/RPL37A/FAP/RPLP1/RPL30/PARVB/EPHA2  
A1324/SNX5/VPS16/CD1A/SNX16/ANTXR1/ATP9A/RAB8B/TLR8/ABCA7/MAP3K7/KREMEN2/STAM/F  
84/CALR/SYT1/LAIR1/CYSTM1/OCRL/DNM1L/AP1G2/CYB561D2/SYT3/CPE/AP1B1/STX4/M6PR/CC

Q/INTS7/BAZ2A/PPIE/RBM14/EIF3E/APBB1/CHFR/DAXX/TRIM69/HSPB7/PLEKHH2/SUGP2/NEK6/

OMMD9/RAB10/DYNC1LI1/GALNS/DSN1/SLC44A2/IMPDH2/ATP6VOC/PSMD11/SPESP1/PSMD1/C5AF  
561D2/SYT3/CPE/AP1B1/STX4/M6PR/COPG1/CLEC5A/TMEM199/TBC1D10C/ATP6VOD1/PDCD6/RAS  
KMT5C/ZMIZ2/DONSON/TIPIN/MSH2/PADI2/CHD4/RUVBL2/CENPB/CCND2/EXOSC5/POLE4/RBBP4/  
IUC20/TPST1/CHPF/APP/SLC9A7/OCRL/DNM1L/AP1G2/AP3D1/TRAPPC3/SLC35C1/AP1B1/ST3GAL5  
35/CFTR/SH3GLB1/MAN2B1/LTV1/MCOLN3/CYB5R3/CCZ1B/GNAI3/GLIPR1/HEXB/MYO6/TMBIM1/S  
/PDIA3/SNX3/YIPF1/CAV1/RAB13/SLC9A6/LITAF/VPS4A/SLC9A9/PLD1/KIAA1324/SNX5/VPS16  
1/DCLRE1C/MMS22L/SIN3B/TRRAP/DBP1/JUNB/TFPT/TRPS1/TFIP11/ASXL1/USP3/THOC7/TTI1/  
DLIM4/MOB2/OLFM4/OPTN/RAB3A/PAK2/MYO6/TRAF4/COPS5/PTOV1/CD2AP/LMTK2/RAB11A/ZPR1  
L19/PARD3/PI1B/TLN1/RPS11/PROCR/RHOA/RPL13A/YWHAG/CLTC/GAK/ACTN4/RPL37A/FAP/RPL  
I6PR/CSPG5/COPG1/B4GALNT3/TRAPPC2L/PIFO/MMGT1/CLIP3/CHST12/PDCD6/NSF/B4GALNT4/AF

MAP1LC3B/TUBB2B/EVPL/MAP4/TUBG2/NES/NEB/KIF2A/ODF2/KPTN/CAPZB/LUM/BAG3/COL4A2/S  
MAP1LC3B/TUBB2B/EVPL/MAP4/TUBG2/NES/NEB/KIF2A/ODF2/KPTN/CAPZB/LUM/BAG3/COL4A2/S  
2A/SYNGR3/CLN3/SLC11A1/RNASE2/MCTP1/RAC1/TMEM163/VDAC1/ANXA11/IL1B/MAGED2/CTSS/  
B/TUBB2B/EVPL/MAP4/TUBG2/NES/NEB/KIF2A/ODF2/KPTN/CAPZB/LUM/BAG3/SMTN/ZNF207/VPS  
NA/BAG2/KRT10/SRPRB/DBNL/BCL10/HOOK2/BOD1/CSPP1/DNM2/CDK2AP2/CCSAP/DCTN1/HAUS7/  
PL23A/RHEB/MCTS1/JRK/PIWIL4/MRPL48/SNRPB2/PRPF19/DAP3/CHTOP/MRPS7/LARP4B/PTGES

/PXN/CSRP2

CSRP2

4/RPL9/PXN/CSRP2

IAM2

4/SLC04C1/VPS16





P6V0C/APH1B/MVB12A/PTPN23/HLA-B/ATP6V0E1/PTP4A2/DENND6B/TRAF3/IL2RB/CST7/GRB2/P  
I/UBE2D2/POLR2J/ZDHHC9/GLMN/ATG13/RNF8/DCAF7/POLR2D/PRKAG1/PIK3R5/SOCS7/WDR41/M



:/DNM2/PTK2/VPS35/VPS45/AAK1/PDLIM4/GRIN2D/CTBP2/VDAC2/RPL6/RAB3A/GABRB3/PAK2/L2

YF2/RBM15/DAZAP2/CWC15/PSPC1/LPXN/HSPA1A/CRNKL1/GPATCH2/TUT1/CIR1/SF3A1/SRSF4/W

LIM4/HNRNPU/MAP1A/MARK4/LZTS1/ANXA3/CANX/LMTK2/ZPR1/TUBB3/SLC2A3/CDK5R1/PARD3/F

3A/SUPT6H/KDM3A/PRKCB/MBD1/SMAD2/WBP2/ZNF431/HDAC3/BAP1/SMC1A/SMAD3/SUPT16H/SAF  
IP4/ASXL1/PXN/TRIM32/MXD4/SRA1/NAB2/PRMT5/NCOA6/GTF2A2/ZHX2/PFDN5/PPRC1/PARK7/E  
/BCR  
P1A/CTBP2/NEBL/RPS4X/RPL6/ACTN1/JPH1/RPL37/RPL27A/ADD3/MUC6/RPL36/UBA52/CD2AP/1  
P3/RALGAPB/ATP1B1  
A/VBP1/KIF15/GNB1/STMN3/WAS/CDH17/VASH2/VIL1/GSK3A/RAB10/NCALD/MAP1LC3B/PFN1/W/  
R1/NUAK1/CDK20/STK3/NEK6/GAK/PRKAG1/MAP3K1/MINK1/MAPKAPK5/PHKA2/GTF2H1/NME4/PHF  
DDX41/NKIRAS2/CDC42/DNAL4/AGAP1/MYO9B/HELLS/XRCC6/POLQ/DNM1L/CCDC102A/DDX54/KA1  
DDX41/NKIRAS2/CDC42/DNAL4/AGAP1/MYO9B/HELLS/XRCC6/POLQ/DNM1L/CCDC102A/DDX54/KA1  
DDX41/NKIRAS2/CDC42/DNAL4/AGAP1/MYO9B/HELLS/XRCC6/POLQ/DNM1L/CCDC102A/DDX54/KA1  
1/MYO9B/HELLS/XRCC6/POLQ/DNM1L/CCDC102A/DDX54/KATNB1/MYO5A/RALB/ABCC10/RGS3/CC1  
EF1A2/PKIA/TNNI3/ABL1/TNFAIP3/RPS7/CALM2/PDCD10/TDG/TRIP6/CSK/TRADD/CHEK2/MAPK/  
N1/USF1/PTPN1/CCNJL/FBXW5/BICD1/PPP1R12C/MAVS/CTBP2/PFKFB2/CCNE2/PAK2/FNTA/SREE  
/HSPA2/CCDC6/TNNI3/ABL1/VCP/SCAF1/CALM2/TDG/TRADD/RUFY1/DBNL/PTPN12/BCL10/HSP9C  
14/SOCS3/PFN1/ARHGAP30/AGFG1/PPP1R1B/ABR/SET/USP14/GCN1/CDKN2C/PSMD1/SBF1/SIPA1  
JMA1/CD2AP/NOTCH3/CDK5R1/TLN1/EIF3E/EXOC3/ACTN4/EGFL6/FNBP1L/FAP/RSL1D1/SPTAN1/  
M1/IP04/RANBP3/DOCK10/YIPF1/EGF/CAV1/ATP7A/ARHGEF17/PREX1/ARFGEF1/RIC8B/CIB1/AF

1D25/DENND6A/DOCK11/EPS8L2/KCTD13/DOCK7/MAP3K11/VAV3/PLEKHG5/USP33/BICD2/RASGRF  
TMEM127/PDE6D/TBC1D25/DENND6A/DOCK11/EPS8L2/KCTD13/DOCK7/MAP3K11/VAV3/PLEKHG5/U

PK1/CSK/CIITA/CHEK2/MAPKAPK3/CCND3/PRKAA2/ACVR1B/STK40/DGKA/PTK2/CSNK2A1/TNK2/C

:/SBK1/KSR1/NOL9/CDK11A/DOLK/PIK3R6/PDK3/IRAK2/CCL8/PGM2L1/MAP4K1/PI4K2A/ATR/CHK







./TFDP1/KLF5/PELP1/ATG7/TLE6/LDB1/TP53BP1/HMGA2/RPTOR/TRIM68/GTF2F1/CRTC3/HDAC5/

./SUPV3L1/RNASE7/MED21/DGCR8/TDRD9/DDX21





4/UBTF/SREBF1/GLI1/PIH1D1/MESP1/MECP2/RBMX/VEZF1/ARID3B/BAZ2A/TWIST1/SRF/HES2/5

ISS6/RBM14/CC2D2A/RHOA/NEK6/CLTC  
O5/DBF4/AATF/TUBB4A/CNOT9/CDKN2B/CCL2/RTKN/DAPK3/CSNK1D/ANAPC7/CDK2/LSM10/KIF14  
ALR/MATN3/CDC42SE2/SEMA4D/SYT1/APP/CDC42EP2/DNM1L/MAPK7/SYT3/SEMA4F/AXL/SEMA5B/  
.17/ABL1/FCGR2B/TNFAIP3/NFATC4/CSK/RNF216/CD33/BCL10/PTGER4/TWSG1/TUSC2/THBS1/ADAM17/CASP8/CAPN2/SRGN/S1PR3/MAVS/IRF5/IL20RB/TLR2/TRIM21/CD2AP/HLA-F/ATP6AP2

11/XRCC6/PSMD3/CTSD/PSMD7/BTK/GMFG/STX4/CBL/PRDX4/CLEC5A/CCT8/TBC1D10C/GPR183/LBP/FCGR3B/HP5  
MD3/CTSD/PSMD7/BTK/GMFG/STX4/CBL/PRDX4/CLEC5A/CCT8/TBC1D10C/LBP/MAPT/FCGR3B/HP5  
1/BIN2/RAB5C/DBNL/PSAP/CD33/HSP90AA1/C12orf4/CD177/MAN2B1/OLFM4/CYB5R3/GLIPR1/FA  
4/ANXA3/AP2A2/ATP6AP2/SLC2A3/TSPAN14/MLEC/PSMC3/PIIE/AGA/ADGRG3/SIGLEC9/RHOA  
CC6/PSMD3/CTSD/PSMD7/BTK/GMFG/STX4/CBL/PRDX4/CLEC5A/CCT8/TBC1D10C/GPR183/LBP/FC  
MSH2/PADI2/TRAPPC1/GSDMD/ARRB2/STK10/GPR84/CNN2/IL4R/ALDOC/GZMM/LAIR1/PNP/SWAP70  
HEXB/PLA2G1B/TLR2/CSNK2B/TMBIM1/SLC15A4/ANXA3/AP2A2/ATP6AP2/SLC2A3/TSPAN14/MLEC  
C3/BTN2A2/CCL3/KCNAB2/MEIS2/MFNG/HSPD1/ESCO2/PSMD8/LFNG/RARG/ABL1/SART1/HLA-DOA  
UT7/GNAS/CD80/TP53/SOX13/RASGRP1/FGL2/LILRB2/MYH9/NRROS

12/PLA2G7/PSMB4/IL1B/ACTB/BCAR1/IL2RA/CTSS/CD47/PSMB8/NFAM1/TNFSF13B/PSMB10/PHB/  
B1/IRAK2/CAV1/DAB2IP/INPP5D/DUSP22/CD3G/PTPRC/NECTIN2/CLEC4E/BAG6/ZCCHC3/BTN2A1  
.8/C5AR2/CD40/PPP3CB/PSMD12

2L/BEND3/TOPBP1/APOBEC3D/TDRKH/PRIM2/SWAP70/CBX8/POLR2K/HELLS/CETN2/XRCC6/HMGNI  
2L/STUB1/HUWE1/TRRAP/DBB1/TFPT/EXO5/TFIP11/SPIRE2/USP3/POLG2/COPS8/NCOA6/TCEA1/  
POLE3/BRPF1/UBE2N/ELOF1/MECOM/CTBP1/IPO4/SUV39H1/MORF4L1/EP400/LDB1/SUPT4H1/PCC  
1/RBM42/CPSF3/DDX23/PTBP1/SEN3/GTPBP3/RPS15/ADAT3/PRKRIP1/RPS16/PUS7/PRPF38A/V  
PARS2/HARS2/MRPL4/RBM24/DPH3/EIF6/EIF4G2/EIF4G3/CNOT3/RPS9/KHSRP/DALRD3/EIF3G/I  
TGFB2/SERPINB6/PTPN6/PSMD13/AGPAT2/COMMD9/RAB10/DYNC1LI1/CCR1/GALNS/DSN1/SLC44/

/POLD3/INO80C/TRIM25/TIMELESS/PTTG1IP/MAPT/MCTS1/EID3/PRPF19/ESCO2/RAD51C/BTG2/  
ICDL2/CKAP2/TTC26/NTMT1/CKAP5/HSPB11/MZT1/RHOT2/ABL1/TBCD/KLHL42/VCP/STMN2/NSFI  
8/PIDD1/HSPA2/PK1A/ABL1/PSMA1/PIM3/MTA3/NSFL1C/DCLRE1B/EME2/CHEK2/CLSPN/CEP41/C  
ADRA2A/MVD/PNP/CBX8/TMEM119/TRPM4/FADD/ECM1/PELI1/STX4/RPL23/CLEC7A/ROMO1/RASAI  
EMIN6/SYNCRIP/SMN2/CLK2/HNRNPA2B1/SUPT6H/U2AF1L4/ELAVL1/LUC7L3/SRSF3/UBL5/TRA2F  
1/UBE2J1/ARRB1/PSMD12/BFAR/ARMC8/SMURF2/RNF40/OGT/MAPK9/CDC26/SOCS5/KLHL22/ANAF  
5/PSMD3/RBX1/PSMD7/RAD21/BABAM1/MTBP/RPL23/RNF4/NME6/RFWD3/MSX1/RBBP7/CEP250/RP  
IAG/ATG13/SART3/DNMT3B/MAPKAPK5/NIN/BTC/BECN1/UBE2N/ANAPC5/EREG/CTBP1/ARF1/TFDP1  
4/SAP30BP/TOMM22/PIAS4/HOXA5/IRF5/ARHGEF11/BNIP3L/MARK4/PAK2/USP27X/BCL2L1/UBAE  
P1G2/RPS19/IKBK/AXL/AP1B1/FADD/RPLP0/RPL18/TBKB1/RPL23/ABI2/RACK1/GADD45GIP1/  
SF3/DDX23/PTBP1/PSMB5/PSMA4/RPS15/PSMD9/PRKRIP1/RPS16/PUS7/PRPF38A/WTAP/RPL5/RI  
/KANSL2/PRMT7/ZBTB7B/BRD8/WDR70/TRIP12/MSL1/KMT2A/CPA4/JARID2/PCGF1/BRCC3/GTF3C  
2/CDC42/IL4R/CXCL11/CCR5/XCL2/CMKLR1/CSF2RA/PSMD4/PSMD3/CCRL2/RBX1/CARD16/PSMD7  
AP1/CIB1/MRPS24/CSNK2A2/MMP15/EIF2D/KLC1/MRPL33/VPS4A/CST3/MRPS5/VPS16/DHX8/ADI  
1/SRPK2/DDX52/COIL/DHX30/AAMP/TEX10/SNRPD3/PWP1/MRPL36/CELF2/NIP7/RPS6/RPF1/MRN  
A3E/FGD1/ARPC1A/WNT4/NF2/OBSCN/BRK1/ARPC5/TNNI3/ABL1/ACTR3/ARAP1/DBNL/PTGER4/SF  
9A/LPAR1/PLEKHM1/ARMC9/CCDC88A/NEURL1/C2CD3/CNTRL/TCHP/DMTN/DYNC2LI1/CEP97/RAB5  
.1/PDLIM4/FLII/MOB2/NEBL/ARHGEF11/ACTN1/PLA2G1B/ADD3/PACSIN2/LIMA1/CD2AP/PACSIN1  
/PSMB5/BAD/PSMA4/PTGER4/ACVR1B/VCAM1/TWSG1/PSMD9/TUSC2/PTPN2/THBS1/ADAM17/PUS7/

/LIMS1/ABL1/TBCD/SART1/FCGR2B/SFRP2/AKNA/SIPA1/CSK/LAMA4/BAD/EMID1/PLXNC1/BCL1C  
.1C/UBQLN4/RPS7/DENND3/KCTD5/FOXF2/BAG2/CHEK2/RNF216/PSMB5/SGSM3/PSMA4/HSP90AA1/  
A5B/ANGPT2/CLEC7A/RACK1/SEMA3C/GPR183/SEMA3E/IGF1R/LBP/PDCD6/WNT4/EPPK1/NF2/CCI  
SEMA3C/EPB41L3/CUL4B/PMP22/PTPRF/SEMA3E/MAPT/RERE/CHN1/ZNF335/BTG2/EXT1/CBFA2T2

./RHOA/CD38/RAPGEF1/IFT20/ENPP2/GAK/ACAP3/PDPN/FNBP1L/GPC2/NIN/ADCY6/DPYSL3/STAF  
OAA1/PSMD9/UBA2/RPL5/RPS27A/FBXW5/CTU2/MAGEF1/RNF2/PIAS4/RAD18/MED27/MASTL/HSP  
AR/PRKCI/TGFB3/ZMYND8/ADRA2A/DNAJB6/SWAP70/SNX12/TLR5/HK1/GZMB/DNM1L/TRPM4/CTSI  
26/RPL23A/NF2/OBSCN/HSPD1/ESCO2/GGA1/IP013/PKIA/IL10RA/TIMM13/WRAP53/TNFAIP3/MF  
F3/SNU13/RPS3/RBBP4/CAPZB/PRPF6/SDHAF2/GRB2/EIF3H/VCX/ZNF207/AGO2/VPS18/ARHGAP1  
7/RPL27A/DXO/EXOSC7/TBRG4/RPL36/UBA52/ZPR1/NANOS1/NUDT18/ETF1/RPL19/PSMC3/RPS11/  
3/TRMT2B/RBFA/RPS14/GTF2F1/RPS27/EXOSC2/TAF1B/CDK5RAP1/DDX52/METTL3/TEX10/PWP1/C  
'CYB5R3/GLIPR1/RAB3A/HEXB/TLR2/CSNK2B/TMBIM1/SLC15A4/ANXA3/AP2A2/ATP6AP2/SLC2A3/  
'CADM4/PADI2/ABI3/GRB7/TACSTD2/PRKD2/SEMA4B/PARD6B/SYDE1/STK10/AGO2/ARHGAP18/CAI

.PR1/RAB3A/HEXB/TLR2/CSNK2B/TMBIM1/SLC15A4/ANXA3/AP2A2/ATP6AP2/SLC2A3/TSPAN14/MI

'L15/C12orf65/PARS2/HARS2/MRPL4/RBM24/DPH3/EIF6/EIF4G2/EIF4G3/GCLM/CNOT3/RPS9/KI  
K10/CDK5R1/PPM1F/NDUFA13/APBB1/TPD52L1/PLAGL2/RHOA/STK3/YWHAG/PNMA3/ANP32B/FAP/  
RINA/ACVR1/PIDD1/SLC25A5/ABL1/VHL/PIM3/SFRP2/TNFAIP3/NFATC4/PDCD10/TRADD/BCL10/F  
52/MAP3K10/CDK5R1/PPM1F/NDUFA13/APBB1/TPD52L1/PLAGL2/RHOA/STK3/YWHAG/PNMA3/ANP32  
KLE2/BTG2/GRINA/ACVR1/PIDD1/SLC25A5/ABL1/VHL/PIM3/SFRP2/TNFAIP3/NFATC4/PDCD10/1

IF4/ABI2/CLEC7A/RACK1/RALB/RPA2/CUL4B/CLIP3/DRG1/MAPT/ARPC1A/WNT4/NF2/EMILIN1/BF  
EKHM1/CCDC88A/RIOK1/TRIM27/PIP4K2B/NEURL1/CAND1/ULK1/NPHP1/IFNG/FAM98A/AIM2/MAF  
P1/RPS20/CCR5/NUP107/POLR2K/XRCC6/RPL18A/RBX1/AP1G2/RPS19/IKBKG/AXL/AP1B1/FADD/I  
P1A/GRK2/APOBEC3D/CPSF4/RPL35/RANBP1/RPS20/CCR5/NUP107/POLR2K/XRCC6/RPL18A/RBX1  
'HSPA2/ADAM28/HVCN1/SRPK1/BAD/ACVR1B/DNM2/SPIRE1/SPA17/NOTCH1/CAPN2/CFTR/GJB3/P/  
'BTG2/PSMD8/ACVR1/TAF10/PIDD1/HSPA2/SUSD2/PKIA/PSMA1/MTA3/CHEK2/CLSPN/CEP41/CCNI  
'6VOC/PSMD11/PSMD1/C5AR1/TMEM63A/PADI2/SYT12/TRAPPC1/GSDMD/RIMS3/STK10/GPR84/CN  
'TRAF3/PSMB3/ARRB2/CD6/APOBEC3D/GZMM/MUC20/XCL2/APP/CDC42EP2/TLR5/PSMD4/XRCC6/G  
3/LILRB1/RNF135

'ADD/BTK/STK25/CLEC7A/ARHGDIA/SCN1B/CSPG5/SEMA3C/MAPT/WNT4/TGIF2/RHEB/NF2/BTN2A2  
J/PLK3/RNF2/ZFYVE19/UIMC1/TBRG4/BCL2L1/GPR132/CRLF3/TRIM37/KIF20B/ALOX15B/BTG3/I  
'ADAM17/PTPN1/CCNJL/DUS2/RPS27A/VEGFA/CCNE2/PLA2G1B/PAK2/TRAF4/CSNK2B/UBA52/DUSF  
-F/RAB29/RHBDD3/NKAP/IL21R/STOML2/ADGRG3/CD79B/SRF/RHOA/GLMN/CD38/INHA/AP3B1/RNF

3L1/SART1/HLA-DOA/FCGR2B/PSMA1/SFRP2/TOX/PSMB5/BAD/PSMA4/PTGER4/ACVR1B/VCAM1/TW  
S/ADM/EPHA2/AP2A1/ARTN

'IKZF3/CNR1/METTL3/LOXL3/DOCK8/TNFRSF1B/NFKBID/CASP3/CLPTM1/CD22/BCR/ICOS/MFHAS1

'THRA/VDAC2/ERCC1/VEGFA/EXOSC10/TLR2/ADD3/PACSIN2/LIMA1/BCL2L1/PIH1D1/EML2/RAB25  
'GRB7/TACSTD2/PRKD2/SEMA4B/PARD6B/SYDE1/STK10/AGO2/ARHGAP18/CALR/ZMYND8/SEMA4D/)

3/IKBKG/DSTYK/GMFG/CBL/RPL23/STK25/AKT1S1/WDR91/RACK1/ZNF675/RALB/RGS3/PIFO/IGF1  
./PLCB2/ARAP1/TRADD/TBC1D7/BAD/SGSM3/PSAP/ARHGAP11A/CD33/BCL10/SRGAP2/RCN3/DNM2/  
3TN/PLEKHH2/RHOA

3/BICD1/HNRNPU/LTV1/CTBP2/RAB3A/MARK4/HAUS5/DEF8/DYNC1I2/RAB11A/NEDD1/BORCS6/CE  
IGA/PRKCB/CNIH2/CDK5RAP2/FAM91A1/DOCK7/CHRNA5/CHMP6/SPICE1/TRAK2/SYP/CADPS2/ACTF  
DBNL/PLXNC1/CTNNA1/SRGAP2/DNM2/PTK2/STYXL1/VPS35/NOTCH1/TMEM98/FIG4/MOB2/LLPH/VI

324/STMN2/RASAL1/SFRP2/NFATC4/GDF11/KEL/BAD/DENND5A/DBNL/PLXNC1/CTNNA1/SRGAP2/DN  
I3GL1/LILRB4/PDCD5/STX4/RACK1/MYO5A/RALB/CSPG5/CEP250/CCT8/GNL3/PARD6G/CLIP3/MAF  
3/CARD16/IKBKG/AXL/FADD/PELI1/DSTYK/CBL/RACK1/IGBP1/ARHGDIA/MSX1/OGG1/CLEC5A/BNJ  
'CGR2B/TIMM13/NSFL1C/LPCAT2/APOO/STX7/KCNN4/ACTR3/VAMP8/BIN2/BAD/PSAP/LEMD2/HSP5

CAF15/PDCD6/MED12/LRRC41/PRPF19/UBXN1/PELI3/PSMD8/TRAF7/TAF10/DESI2/ABL1/KLHL42/PI1/DBNL/HSP90AA1/PRKAA2/RPS15/DNM2/TCTEX1D2/CCSAP/STYXL1/DCTN1/RPL5/NOTCH1/CEI'ZDHH9/RPL13A/YWHAG/ABHD17A/IFT20/CLTC/STXBP1/GAK/RPL37A/AP2B1/RPLP1/GPC2/RPL32'1/TRAF4/COPS5/HSPA5/TXNDC12/BCL2L1/EDEM2/MAP3K10/HIKESHI/NUAK1/UBR5/TWIST1/APBETGER4/EFEMP2/SPIRE1/CCSAP/DCTN1/INPPL1/KATNA1/PLK3/MAP1A/NEBL/ACTN1/PLA2G1B/MAF'CDHR2/ABL1/SART1/VCL/FCGR2B/AKNA/CSK/CDH24/TTYH1/BAD/CD33/BCL10/B4GALNT2/VCAM1/3A/NEURL1/C2CD3/CNTRL/TCHP/DMTN/DYNC2LI1/CEP97/RAB3IP/NPHP1/ARL3/CELSR3/FAM98A/M'20/ENPP2/GAK/ACAP3/PDPN/FNBP1L/GPC2/NIN/ADCY6/DPYSL3/SNAPIN/EPS8L1/EPHA2/AP2A1/

KN1C/AKAP8L/PSMB4/IL1B/NCAPH2/PSMB8/PSMB10/PSMA5/POC1A/PTPN6/PSMD13/CHMP3/PSMC2X2/MEIS1/ZAP70/HSPA1A/CTNNBIP1/PSMD6/MALT1/CLDN18/CD101/LEO1/HLA-G/GATA3/NFATC2

IGAP18/CALR/ZMYND8/SEMA4D/XCL2/CMKLR1/APP/ADRA2A/SWAP70/DPEP1/SEMA4F/FADD/ECM1/5

.5/WDR83/PAPOLA/SMN1/HNRNPH2/CRNKL1/SF1/HNRNPH3/ZMAT2/USP4/CWF19L1/SF3A1/SRSF4/C'OLA/SMN1/HNRNPH2/CRNKL1/SF1/HNRNPH3/ZMAT2/USP4/CWF19L1/SF3A1/SRSF4/GPATCH1/PDCI'OLA/SMN1/HNRNPH2/CRNKL1/SF1/HNRNPH3/ZMAT2/USP4/CWF19L1/SF3A1/SRSF4/GPATCH1/PDCI

.R1/BIN2/RAB5C/DBNL/PSAP/CD33/HSP90AA1/C12orf4/TUSC2/ADAM17/CD177/MAN2B1/MAVS/OI'ICOS/MFHAS1

'UBE2N/CD247/TLR7/HSP90B1/IRAK2/CAV1/DAB2IP/INPP5D/DUSP22/CD3G/PTPRC/NECTIN2/CLIF'3/THOC7/HNRNPD/PRMT5/FASTKD5/SNRNP200/RBM22/DDX20/GEMIN8/U2SURP/PDCD11/HNRNPC/1

'/ARHGEF17/PREX1/ARHGAP22/EPHB2/ARFGEF1/ARHGAP17/CNKSR1/CYTH3/RAB1A/PLD1/RALBP1/ISRP/CAV1/SPOUT1/DNAJC1/RPS14/MIR155HG/MKNK1/EXOSC2/LARP1/YTHDF2/CDK5RAP1/CASC3/

IRPS10/ABCE1/MRPL45

I2/RAB5C/DBNL/PSAP/CD33/HSP90AA1/C12orf4/CD177/MAN2B1/OLFM4/CYB5R3/GLIPR1/RAB3A/I4/ANXA3/AP2A2/ATP6AP2/SLC2A3/TSPAN14/MLEC/PSMC3/PPIE/AGA/ADGRG3/SIGLEC9/RHOA.SPN/CEP41/CCND3/PSMB5/PSMA4/HSP90AA1/ACVR1B/PSMD9/DNM2/ADAM17/CDK2AP2/DCTN1/CCN

HEK2/CCND3/BOD1/CSPP1/SPIRE1/CDK2AP2/CCSAP/DCTN1/NOTCH1/CEP164/HAUS7/KATNA1/PLF

.S3/PPM1F/NDUFA13/TPD52L1/PLAGL2/DAXX/STK3/GSKIP/CD38/YWHAG/IFI6/FAF1/CCAR2/BECN

'YM1/HNRNPC/RPS3A/AGO1/RPL14/RPL10A/FXR1/SYNCRIP/EIF4G1/PSMB7/CNOT2/RPL12/RPS18/'P2CA/TNFSF13/PAIP1/RPL22/LSM3/TARDBP/RPS15A/SMG8



74/DUS3L/WDR18/TARBP1/TRMT10C/ANKRD16/METTL16/MRM1/CDKAL1/XRN2/TRIT1/ADAT2/ELP6

11/PDCD1LG2/CD70/SOCS5/CD274













./KMT2A/CPA4/JARID2/PCGF1/BRCC3/GTF3C4/PHC1/MYB/BRCA2/HR/SUDS3/WDR82/GTF2B/SETD5

2/PDCD10/CSK/CLSPN/MAPKAPK3/CCND3/BAD/DBNL/BCL10/ERP29/HSP90AA1/TNFSF15/LMO4/PRF  
H3/PPP2R5B/CDK5R1/METRNL/APBB1/SRF/CAPRIN1/RHOA/CD38/HES2/RAPGEF1/YWHAG/GAK/SIX1

MOCH/CD79A/UBE2D1/IL15/ABR/PSMD10/PSMD11/PSMD1/C5AR1/HLA-B/GPX1/MSH2/PSMA7/LRP8/  
UB/UBE2N/ADCY5/KITLG/EREG/CCL19/PIK3R6/IRAK2/CACUL1/EGF/MAP4K1/MAP4K2/DAB2IP/HMC





'VPS29/FOX1/PSMB7/NKD2/SPIN1/SKP1/FZD9/GNG2  
'WWTR1/SUMO2/USP3/FBX010/TRIM32/PSMB6/RPL11/CDC23/KLHL25/MVB12B/RNF149/PSMA3/PAF  
37B/USP11/UBE2D2/CHFR/AGAP3/GLMN/VPS11/CLTC/RNF8/ANKZF1/AP2B1/FAP/LGMN/TMUB1/PSM  
3IH2/NDUFB2/EIF4G1/NDUFAF3/FZD9/SESN2/ATG3/PNPT1/TRAK2/UBL5/LIG3/ESRRA/MUL1/BAP1

'2/ETF1/RPL19/MRPL37/EIF5A/CPM/RPS11/EIF3E/CAPRIN1/RPL22L1/RPUSD3/NSUN4/RHOA/RPI  
./UBE2D2/CHFR/NMI/RASSF5/DAXX/TRIM69/GLMN/RNF8/DCAF7/PRMT3/SOCS7/MED7/UNKL/PSMC5  
; /RPL11/CDC23/KLHL25/MVB12B/RNF149/PSMA3/PARK7/BUB3/RNF144A/USP36/NUB1/UBQLN2/RN  
IB/UBAC2/AUP1/MAEA/CACUL1/EGF/HSPA13/CAV1/NEDD8/DAB2IP/GET4/FBXO6/PKD1/CSNK2A2/SG  
; /BCL7B/VPS29/FOXO1/PSMB7/NKD2/SPIN1/SKP1/FZD9/GNG2  
; CAB3/PIGX/DAD1/GUK1/POFUT2/UGCG/FUT8/NME3/GALNT7/ALG1/NPPB/LARGE2/PFKFB2/GXYLT2  
D2/GRB2/ARRB2/CALR/TGFB3/MUC20/SEMA4D/XCL2/APP/ADRA2A/DNM1L/TELO2/RELL2/PPP5C/C

.RC4/BPIFB1/PTPRS/CLEC4A/APPL2/RPS6KA3/TLR1/S100A1/NOD2/XRCC5  
G5/KIF17/RFX3/INTU/RPGR/RPGRIP1L/HAP1/PRKAR2B/CEP152/DRC1/BBS5/CFAP44/LRRC49/CI

36/NUDCD3/KIF3B/ARL13B/AHI1/ATG5/KIF17/RFX3/INTU/RPGR/RPGRIP1L/HAP1/PRKAR2B/CEP

'MVB12B/RNF149/PSMA3/PARK7/BUB3/RNF144A/USP36/NUB1/UBQLN2/RNF121/WWP2/ARIH2/RNF1  
'NK2A2/PABPC1L/ACTR1A/NECTIN2/YTHDF2/ADCY3/BAG6/RFX2/SLC04C1/CNR1/ZSCAN2/METTL3/  
'SPATA2/RNF114/TLE6/DKKL1/DZIP1/CIB1/SIX5/CSNK2A2/PABPC1L/ACTR1A/NECTIN2/YTHDF2/  
'TLE6/DKKL1/DZIP1/CIB1/SIX5/CSNK2A2/PABPC1L/ACTR1A/NECTIN2/YTHDF2/BAG6/RFX2/SLC





AR3/RACK1/RALB/GPR183/BTBD10/PIFO/IGF1R/CLIP3/MAPT/CSPG4/DBF4B/CCL3/S100A7/CEM1





2/DGKQ/PPP2R5B/CDC37/CDK5R1/SULF2/HNRNPA1/POLR2I/POLR2J/RHOA/RAPGEF1/IFT20/POLR2  
2IP/RPTOR/PARP10/CALM3/ENSA/EPHB2/CIB1/DUSP22/PTPRC/CDK5RAP1/HDAC8/PWP1/BDKRB2/V

;100A7/CEMIP/ACVR1/TRAF7/CXCL17/HSPA2/ABL1/STK24/FCGR2B/SFRP2/BRAT1/CALM2/PDCD1C  
P2R3C/ACE/MUL1/WNK1/NOD2/PPP2CA/XRCC5/CARD14/RASSF2/MAP3K12/PDE5A/AFAP1L2/STRAI

RYK/PIK3CB/PLXNB2/DPYSL4/KIF3A/FSTL4/NCKAP1/PLCG1/MOV10/PPP1R9A/CNP/NCAM1/POLG2/  
38A

PI1/PLCG1/MOV10/PPP1R9A/CNP/NCAM1/RPL24/ETV1/SEMA3F/MEGF8/EGR2/ULK1/MNX1/KNDC1/CI  
1/STX4/CLEC7A/TNIP1/EIF2B5/POLR3D/LBP/ARPC1A/POLR3C/EXOSC3/BTN2A2/BRK1/HSPD1/P5

ALR/GRK2/FAM155B/CDC42SE2/SYT1/APP/SNX12/SLC9A7/DNM1L/TRPM4/SH3GL1/AXL/CBL/CLE

P3K7/UCN/CCDC88A/COPS8/NAB2/MADD/NEURL1/PARK7/PDE6G/SLC27A1/CD4/JTB/IFNG/ZNF62

:/DBNL/HOOK2/HSP90AA1/DNM2/TUSC2/PTK2/THBS1/TNK2/PTPN1/INPPL1/AAK1/SFRP4/BICD1/(

)C42/TGFB3/MUC20/RBPMS/VPS25/APP/ADRA2A/POLR2K/SPRY4/CD8A/AXL/DSTYK/CBL/AKT1S1/f

'CNP/NCAM1/RPL24/ETV1/SEMA3F/MEGF8/EGR2/ULK1/MNX1/KNDC1/CELSR3/TRIM46/XK/SEMA6B/

J1/PARVB/EPHA2/ARTN/IST1/VPS33A/DOCK10/NEO1/PREX1/EPHB2/CIB1/SLC9A6/FRMD6/EPHA1C  
.F1/MSL3P1/SIN3A/PAXIP1/NUP98/NDUFAB1/PRDM2/HDAC4/JADE3/DHPS/ING4/ATRX/LIPT2/GF1

'OLR3H/POLR3C/CCL3/S100A7/CDK19/ABL1/FCGR2B/IL10RA/TNFAIP3/RNF216/MAPKAPK3/BAD/C  
'KNDC1/CELSR3/TRIM46/XK/SEMA6B/TRIO/LHX2/PTPRA/SEMA4C/MAP4K4/PTPRS/DOCK7/CUL7/TF  
'OLR3H/POLR3C/CCL3/S100A7/CDK19/ABL1/FCGR2B/IL10RA/TNFAIP3/RNF216/MAPKAPK3/BAD/C  
18B/HUWE1/PITRM1/SRP68/TRAM1/RPL13/SNX16/RAB8B/RPL4/RPL41/RPL9/RPS6/TNP03/RPL24/

IG3/PIK3R2/RAB7A/KDM4A/ZMPSTE24/CHMP6/MUL1/TSC1/USP33/CPTP/TSG101/TP53/FEZ1/SPTI  
MO1/TRIM25/POLR3D/LBP/POLR3H/POLR3C/CCL3/S100A7/CDK19/HSPD1/ABL1/FCGR2B/IL10RA/  
RPL19/MRPL37/EIF5A/RPS11/EIF3E/CAPRIN1/RPL22L1/RPUSD3/NSUN4/RHOA/RPL13A/MRPL27/M  
IG3/PIK3R2/RAB7A/KDM4A/ZMPSTE24/CHMP6/MUL1/TSC1/USP33/CPTP/TSG101/TP53/FEZ1/SPTI

./PRDM1/PDCD1LG2/CD70/SOCS5/CD274/STAT3





.A/ZPR1/RAB29/KIF20B/GOLPH3L/RHBDD3/CENPJ/CACNB3/ALOX15B/CDK5R1/UBR5/PPM1F/TWIS1

.00A7/EMILIN1/PSMD8/TRAF7/CXCL17/ABL1/STK24/FCGR2B/PSMA1/RASAL1/SFRP2/PDCD10/CSF  
'SMC3/UBE2D2/STOML2/WIPF2/RBM14/CD79B/CD38/RAPGEF1/MAP3K1/LGMN/ELMO2/PSMC5/UBE2N  
./WWTR1/PIN1/GLRB/CSNK1G1/MOV10/PPP1R9A/STK4/MAP3K7/KREMEN2/PSMB6/VPS26A/NXN/PFI



CL3/S100A7/EMILIN1/PSMD8/TRAF7/CXCL17/ABL1/STK24/FCGR2B/PSMA1/RASAL1/SFRP2/PDCI













.P6VOD1/PLEKHN1/PTTG1IP/HNRNPM/MAPT/NSF/RUBCN/EXOSC3/RHEB/SUPT5H/UBXN1/BTG2/GGA1

3/USP5/UBQLN4/RPS7/FOXF2/MYEF2/BAG2/PSMB5/BAD/PSAP/PSMA4/HSP90AA1/PRKAA2/SGTA/PS



12/RPTOR/GPAT4/CIB1/IL17RB/EXOSC2

2CA/HDAC3/RASSF2/ACKR3/MAPKBP1/MAPKAP1/DUSP26/DAG1/C1QBP/MCL1/PDX1/MARVELD3/ABI



'SYS1/COG1/NOTCH1/VPS45/UGCG/FUT8/SCAMP2/ARFRP1/GALNT7/SH3GLB1/RGP1/FIG4/OPTN/L  
./ATR/TP53BP1/SRCAP/HMGA2/THOC1/DCLRE1C/MMS22L/SIN3B/TRRAP/HDAC8/DBB1/JUNB/TFPT/  
P6VOD1/NSF/RUBCN/HPSE/SLC48A1/RHEB/CSPG4/SGSH/S100A7/GCA/SEC13/EEF1A2/RAB3D/HPS1  
AT5/KDM3B/ETV3/SMCR8/HMGN3/SUZ12/BAZ1B/HMGXB4/L3MBTL1/TAF4/SLX4/ACTR8/NACC2/MEN1  
S/SIRT7/CENPK/NUP43/PML/DYNC1LI1/DSN1/PLK4/PARP1/UBA1/THOC6/NSMF/SMARCB1/CPSF6/P  
L/ZNF207/BEND3/CBX5/RPL35/SERTAD3/PPAN/POLR2K/XRCC6/IP6K1/DDX54/HOXD9/RPS19/NOC  
P6VOD1/NSF/RUBCN/HPSE/SLC48A1/RHEB/CSPG4/SGSH/S100A7/GCA/SEC13/EEF1A2/RAB3D/HPS1

2/CST7/STARD3/VPS18/CTSD/AP3D1/AP1B1/PIP4K2C/BTK/STX4/CBL/CCZ1/MYO5A/ABCC10/M6  
1/CALM3/RIC8B/CIB1/ACTR1A/OFD1/VPS4A/CTDP1/BBS7/TMEM67/CEP72/KIF3A/TRIP4/EFHC1/  
BOD1/CSPP1/DNM2/TCTEX1D2/PTK2/CCSAP/DCTN1/CEP164/ODF2L/HAUS7/KATNA1/PLK3/BICD1/

2/CORO2B/SSX2IP/EIF4G2/HSP90B1/ARF1/PDIA3/RPS9/CAV2/FRMD4A/CAV1/RPS14/ARHGAP22/F  
LEKHM1/VPS26A/NCSTN/MVB12B/HLA-C/RNF144A/OSBPL9/HLA-DOB/VAMP3/RAB22A/AP5S1/ANX/  
PG1/CLEC5A/TMEM199/TBC1D10C/ATP6VOD1/PDCD6/RASSF9/FCGR3B/WNT4/RAB4B/KCNAB2/CEM1

'DCAF7/POLR2D/GATAD2A/SART3/DHX15/ACTN4/TAP2/TOE1/TGS1/HINFP/DHX9/MED7/ZMIZ1/RBA

1/TMEM63A/PADI2/TRAPPC1/GSDMD/ABCA3/ICA1/STK10/GPR84/CNN2/CALR/ALDOC/TGFB3/SYT1  
SF9/FCGR3B/WNT4/RAB4B/KCNAB2/CEMIP/SEC13/RAB3D/HVCN1/VAMP8/RAB5C/MOXD1/DBNL/PS/  
POLA1/TBX19/DFFA/UBE2A/SMARCC1/BRD9/KAT2A/ZNF207/BEND3/CBX5/PRIM2/NUP107/NCOR2/  
POMGNT1/STX4/MGAT4A/NAGPA/STK25/VRK1/ARFIP2/NOSIP/M6PR/CSPG5/COPG1/B4GALNT3/TF  
LC17A5/SLC15A4/BCAN/UBA52/HLA-F/AP2A2/VAC14/ACAN/BORCS6/TMEM138/TECPR1/ARL8B/AC  
CD1A/SNX16/ANTXR1/ATP9A/RAB8B/VPS8/TLR8/AP4B1/ABCA7/MAP3K7/KREMEN2/STAM/PLEKHM  
TRF4/HNRNPC/LRWD1/ING2/THOC3/MYC/YY1AP1/MBD2/HUS1/POLR2B/ASF1A/MAX/RELA/TERF1/5  
./NANOS1/PRDX5/RAB29/TRIM37/KIF20B/TARBP2/PACSIN1/CDK5R1/UBR5/PPM1F/PPIB/PROCR/I  
P1/RPL30/PARVB/EPHA2/CORO2B/SSX2IP/EIF4G2/HSP90B1/ARF1/PDIA3/RPS9/CAV2/FRMD4A/C  
CG1/TMEM87B/RHEB/GLG1/MFNG/FUT1/SEC13/LFNG/EXT1/NSFL1C/LPCAT2/PDCD10/APOO/ARAP1

MTN/ZNF207/VPS18/DNAL4/DNAJB6/FHDC1/MYO9B/DNM1L/KATNB1/SCTR/MYO5A/VIM/KRT20/WDF  
MTN/ZNF207/VPS18/DNAL4/DNAJB6/FHDC1/MYO9B/DNM1L/KATNB1/SCTR/MYO5A/VIM/KRT20/WDF  
PDGFA/WFS1/LAMTOR1/GNS/CD47/FTL/TCP1/NFAM1/FGR/PSMA5/NRAS/TGFB2/SERPINB6/PTPN6/  
18/DNAL4/DNAJB6/FHDC1/MYO9B/DNM1L/KATNB1/SCTR/MYO5A/VIM/KRT20/WDR1/CCT8/HAUS6/1  
KATNA1/BICD1/PDLIM4/HNRNPU/MAP1A/ACTN1/HAUS5/MYO6/CD2AP/DYNC1I2/RAB11A/TUBB3/EM  
NAT10/UTP6/MRPL53/HEATR1/MPV17L2/SART1/SYMPK/VCP/PHF5A/PSMA1/WRAP53/NOP10/KRI1





ARRB2/PARM1/LLGL1/STARD3/VPS18/CHMP1A/PRKCI/PLEKHJ1/CCR5/VPS25/APP/SNX12/SLC9A7/  
MED7/PHKA2/GTF2H1/NAA15/RNMT/DMAP1/PHKG2/POLE3/BRPF1/BECN1/TAF13/RBM15B/FBXL7/UF



TS1/ADD3/COPS5/FBX045/SLC17A5/BCL2L1/CANX/RAB11A/MECP2/PACSIN1/DGKQ/CDK5R1/PLD2

IAC/RBM4/HP1BP3/ZNF217/SPRTN/SETD1B/PLRG1/PIAS2/CDK12/IL16/OSGEP/NSRP1/CWC22

YRSS12/APBB1/CAPRIN1/RHOA/HTR1D/INHA/HNRNPR/ABHD17A/IFT20/MINK1/SNPH/PMM2/NIN/NF

TP53/DDX1/ELK1/KDM3B/HMG3/SUZ12/APEX1/PDX1/L3MBTL1/MEN1/ACTR6/TAF2/TPR/PHF23COR/TFEC/SCAND1/MED20/BRD7/HYAL2/MAX/NSD1/CNOT2/MED30/GON4L/PRKCB/MED16/E2F7/PI

UBB3/ACAN/RPL19/MRPL37/TLN1/RPS11/RPL22L1/COPB2/RPL13A/MRPL27/MRPL28/CLTC/RPL37

USF1/MAP4/RAE1/NEB/KIF2A/KPTN/LRP8/PARVG/RPS3/CROCC/CAPZB/RALA/SMTN/LLGL1/FHOD1/IG2/ADCK5/EPHA2/SBK1/KSR1/NOL9/CDK11A/DOLK/PIK3R6/PDK3/IRAK2/CCL8/PGM2L1/MAP4K1/INB1/MYO5A/RALB/ABCC10/RGS3/CCT8/NUDT22/ATP6VOD1/DRG1/NSF/ABCG1/LONP1/RERG/ATP2/INB1/MYO5A/RALB/ABCC10/RGS3/CCT8/NUDT22/ATP6VOD1/DRG1/NSF/ABCG1/LONP1/RERG/ATP2/INB1/MYO5A/RALB/ABCC10/RGS3/CCT8/NUDT22/ATP6VOD1/DRG1/NSF/ABCG1/LONP1/RERG/ATP2/8/ATP6VOD1/DRG1/NSF/ABCG1/LONP1/RERG/ATP2A3/RHEB/RAB4B/HSPD1/RAD51C/EEF1A2/RAB5APK3/WWC1/CCND3/BAD/BCL10/HSP90AA1/DNM2/PRKRIP1/PTK2/PTPN2/DCTN1/USF1/PTPN1/CCN3F1/TRAF4/BCL2L1/AP2A2/PIH1D1/ZPR1/IFNAR2/CENPJ/CACNB3/CDC37/CDK5R1/PRKAR1B/DAX1)AA1/MPP7/DNM2/PTK2/ADAM17/TNK2/CASP8/FUT8/FKBP8/INPPL1/CFTR/RNF2/MAVS/SARNP/THF.L3/CDC42SE1/CCND2/ANXA4/DNAJC10/DFFA/PPP4R1/BAG3/CST7/SYDE1/PTPA/RNH1/RUNDC1/LI'EPS8L1/EPHA2/IST1/EDIL3/VASN/EIF4G2RHGAP17/LLGL2/CYTH3/RALBP1/EVI5L/MYO1C/DOCK8/KIF3A/ARHGEF18/NCKAP1/PPP1R9A/EIF2F

P1/MAPKAP1/RAB11FIP1/SMCR8/DVL1/CLEC16A/DIAPH3/TNPO2/RNF41/AP3M1/RGL1/ARHGAP44/IFJP33/BICD2/RASGRP1/GGA2/MAPKAP1/RAB11FIP1/SMCR8/RILPL2/DVL1/CLEC16A/DIAPH3/TNPO

NCN1/GUK1/NME3/CTU2/AAK1/PLK3/PFKFB2/CCNE2/MARK4/PAK2/MASTL/OAS3/CDK11B/GNPTAB/

3B/MAP4K2/MKNK1/EPHB2/ERCC3/CSNK2A2/EPHA10/RPS6KC1







'PAGR1/ERCC3/EDF1/TAF1B/TADA3/CTDP1/NIF3L1/BBS7/HDAC8/ADD1/PPARG/JUNB/SUM02/TRIF





IX1/ACTN4/MTERF3/HINFP/DHX9/MLXIP/NR1H2/GMEB2/RUNX3/FOXJ3/NRF1/LYL1/TOX2/RBPJ/z

1/KPNB1/SMC4/NLE1/NASP/DCTN2/KNSTRN/LIG1/PRIM1/CDKN1C/AKAP8L/PSMB4/IL1B/WDHD1/NC  
'STK25/ABI2/ARHGD1A/MSX1/SCN1B/CSPG5/WDR1/SEMA3C/EPB41L3/FMNL3/SEMA3E/MAPT/FGD1/  
JAM17/CASP8/NOTCH1/CAPN2/SRGN/S1PR3/MAVS/IRF5/PLA2G1B/IL20RB/TLR2/TRIM21/CD2AP/I  
2/ALOX15B/SULF2/TWIST1/NMI/GLMN/INHA/IL17RA/SIGIRR/TNFRSF14/DHX9/IDO1/HEG1/ADORA

3P/FCGR3B/HPSE/EXOSC3/RAB4B/CCL3/S100A7/KCNAB2/GCA/MFNG/HSPD1/PAFAH1B2/LFNG/RAB  
3E/RAB4B/CCL3/S100A7/KCNAB2/GCA/HSPD1/PAFAH1B2/RAB3D/ARPC5/VCP/VCL/FCGR2B/APRT/I  
RAB3A/HEXB/TLR2/CSNK2B/TMBIM1/SLC15A4/ANXA3/AP2A2/ATP6AP2/SLC2A3/TSPAN14/MLEC/P

3GR3B/HPSE/EXOSC3/RAB4B/CCL3/S100A7/KCNAB2/GCA/MFNG/HSPD1/PAFAH1B2/LFNG/RAB3D/AI  
70/CYSTM1/XRCC6/GZMB/TRPM4/PSMD3/CTSD/PSMD7/CD8A/FADD/BTK/GMFG/STX4/CBL/PRDX4/WI  
3/PSMC3/PPIE/AGA/ADGRG3/SIGLEC9/RHOA  
A/FCGR2B/PSMA1/SFRP2/TNFAIP3/TOX/PSMB5/BAD/PSMA4/PTGER4/ACVR1B/VCAM1/TWSG1/PSMD

/FGR/LCP2/PSMA5/CD300LF/CCL4/NRAS/WAS/TGFB2/GPSM3/SFPQ/PQBP1/LCK/PTPN6/PSMD13/CI  
L/NFKBIL1/PIK3CB/MY01C/PSMB1/NCKAP1/PLCG1/TLR8/EIF2B4/MAP3K7/NFKBID/PSMB6/FFAR2,

L/POLQ/RBX1/MUTYH/TELO2/PPP5C/FUS/RAD21/RRM1/TATDN1/BABAM1/GZMA/UBE2L6/RFWD3/NAI  
'MGME1/PARK7/UNG/AP5S1/HUS1/POLR2B/PRMT6/FIGNL1/EYA3/ASF1A/ERCC2/ZMPSTE24/TMEM16  
3F3/SRCAP/HMGA2/PARP10/MORC2/GRWD1/HDAC5/PAGR1/PABPC1L/ENY2/TADA3/BAG6/SIN3B/HUV  
VTAP/RPL5/DUS2/NOL6/RPF2/CTU2/BICD1/BMT2/POP5/HNRNPU/NVL/SARNP/HTATSF1/TSN/EXOSC  
JNAJC1/RPS14/MKNK1/RPS27/MRPS24/RPL29/EIF2D/MRPL33/LARP1/YTHDF2/CDK5RAP1/MRPS5/C  
A2/IMPDH2/ABR/ATP6VOC/PSMD11/PSMD1/C5AR1/TMEM63A/PADI2/SYT12/TRAPPC1/GSDMD/RIMS

/PIDD1/DNA2/DOT1L/ABL1/RAD51D/VCP/WRAP53/SFRP2/UBQLN4/BRAT1/DCLRE1B/FAAP20/NFATC  
1C/ACTR3/CEP19/CHEK2/IFT172/HOOK2/COPG2/PRKAA2/SRGAP2/TCTEX1D2/PTK2/SPIRE1/CDK2  
CND3/PSMB5/PSMA4/HSP90AA1/PSMD9/ADAM17/CDK2AP2/CCSAP/DCTN1/CEP164/HAUS7/NBN/FB  
33/GPR183/IGF1R/PDCD6/HPSE/DBF4B/MCTS1/MEIS2/ZNF335/BRK1/CHTOP/RARG/DOT1L/SLC25/  
3/PPP2CA/HNRNPLL/SUGP1/ZRANB2/GEMIN5/CLK3/IWS1/DDX1/LSM3/TARDBP/C1QBP/NOVA1/SRSI  
2C1/PCBP2/DNAJC18/UBXN2A/ZFAND2B/USP13/UBE2K/PSME2

A2/CUL4B/E2F6/HAUS6/NAE1/MYBBP1A/NDE1/DRG1/WNT4/CKAP5/DBF4B/BTN2A2/RAD51C/BTG2/I  
L/RHOBTB2/GMFB/HTT/HAX1/EGF/ATR/MORC2/DZIP1/CSNK2A2/ANAPC4/HUWE1/PAF1/KIAA1324/I  
52/MAP3K10/CDK5R1/PPM1F/NDUFA13/APBB1/TPD52L1/PLAGL2/DAXX/RHOA/STK3/YWHAG/PNMA3,  
'VIM/XRCC4/CLEC5A/TNIP1/PACS2/TRIM25/RPL38/RPL23A/SUPT5H/MCTS1/CCL3/UBXN1/HSPD1,  
PS27A/HNRNPU/RPS12/SARNP/RPS4X/RPL6/HTATSF1/EXOSC9/EXOSC10/LSM8/MAGOH/RPL37/RPL  
24/PHC1/MYB/BRCA2/HR/SUDS3/WDR82/GTF2B/SETD5/LEO1

7/IKBKG/AXL/FADD/ECM1/RPLP0/PELI1/STX4/CBL/RACK1/ZNF675/VIM/IL20RA/CSF2RB/TRIM2  
J1/MRPL36/ACIN1/TFIP11/MRPL14/OGFOD1/CASP3/MRPL3/CAPZA2/ERAL1/PARK7/PYM1/USP36/I  
M2/RPL24/OGFOD1/CHD7/RIOK1/ADAR/RPL11/RPL10/RPS24/PRMT5/DDX31/SNRNP200/DDX20/ER  
RGAP2/SPIRE1/PTPN1/SSH2/INPPL1/PDLIM4/KCNE4/FLII/MOB2/NEBL/ARHGEF11/ACTN1/PLA2G  
3IP/NPHP1/ARL3/CELSR3/FAM98A/MAPK15/HAUS2/IQCG/DOCK11/ATG3/CDK5RAP2/RHOD/EPS8L2,  
L/CDK5R1/ARHGAP28/PPM1F/FAM171A1/TLN1/WIPF2/SRF/DSTN/PLEKHH2/RHOA/MRAS/ACTN4/MI  
'CASP8/NOTCH1/PDCD2/TMEM98/MYL9/HOXA5/THRA/ERCC1/VEGFA/ACTN1/LBR/SMAP1/TLR2/TME

) /B4GALNT2/VCAM1/TWSG1/DNM2/PTK2/PTPN2/THBS1

'SGTA/PSMD9/RCN3/PTK2/UBL7/CSNK2A1/VPS35/CASP8/RPL5/RPS27A/CAPN2/FBXW5/USP21/PLI  
33/S100A7/EMILIN1/CEMIP/ACVR1/CXCL17/AKIRIN1/ABL1/STK24/VCL/SFRP2/CYP19A1/PDCD1C  
2/ABL1/STK24/VCL/STMN2/RASAL1/SFRP2/NFATC4/KEL/DENND5A/DBNL/PLXNC1/HSP90AA1/CTN

IN/EPS8L1/EPHA2/AP2A1/CCL19/IST1/ARF1/KLF5/SNX3/HTT/CAV1/ATP7A/DAB2IP/PREX1/DZ  
A5/FBXO45/TRIM21/IVNS1ABP/LRR1/UBA52/TRPC4AP/UBE2Q1/TRIM37/RNF213/RNF25/UBR5/PS  
)/CARD16/UQC22/LILRB4/PDCD5/STX4/RACK1/RALB/KRT20/CEP250/CLEC5A/HCAR2/CCT8/GNL3,  
F/NSFL1C/RPS7/RPL7A/RPS23/RPS10/BAD/CENPQ/ACOT8/LEMD2/BOD1/HSP90AA1/RPS15/SGTA,  
I8/CALR/CABIN1/SF3A3/NUP107/PPAN/CDC42EP2/PSMD4/HELLS/CETN2/LRRC61/MED25/NDUFS6,  
EXOSC1/EIF3E/SLC25A12/RPL13A/HNRNPR/RNASEH2C/POLR2D/PRKAG1/ANP32A/RPL37A/RPLP1,  
ARS2/QRSL1/SARS2/RPS6/RPF1/RPRD1A/MRM2/CHD7/RIOK1/ADAR/RTCB/RPL11/RPS24/METTL2/  
TSPAN14/MLEC/PSMC3/PPIE/AGA/ADGRG3/SIGLEC9/RHOA  
R/ZMYND8/SEMA4D/XCL2/CMKLR1/APP/ADRA2A/SWAP70/DPEP1/SEMA4F/FADD/ECM1/STX4/SEMA

.EC/PSMC3/PPIE/AGA/ADGRG3/SIGLEC9/RHOA

ISRP/DALRD3/GSS/EIF3G/DNAJC1/RPS14/MKNK1/RPS27/MRPS24/RPL29/EIF2D/MRPL33/LARP1/  
ID01/TIGAR/FAF1/CCAR2/RBM10/ADM/BECN1/PSEN2/CDC34/TFDP1/PRKRA/PDIA3/ATG7/HTT/C  
PRKAA2/CTNNA1/STK40/PTK2/THBS1/HIGD2A/CSNK2A1/DAD1/CASP8/PTPN1/NOTCH1/RPS27A/FKI  
2B/FAP/ID01/TIGAR/FAF1/CCAR2/RBM10/ADM/BECN1/PSEN2/CDC34/TFDP1/PRKRA/PDIA3/ATG7,  
RADD/BAD/BCL10/PRKAA2/CTNNA1/STK40/PTK2/THBS1/HIGD2A/CSNK2A1/DAD1/CASP8/PTPN1/1

RK1/LIMS1/AKIRIN1/HSPA2/ARPC5/ABL1/HEATR1/TBCD/VCP/NPRL3/STMN2/THBS2/TMC8/PALM/  
K15/EIF4G1/TERF1/CNOT2/CHGA/DOCK11/CDK5RAP2/MAP4K4/ERCC2/RAB7A/EP8L2  
RPLP0/RPL18/TBKB1/CBL/RPL23/ABI2/RACK1/GADD45GIP1/VIM/XRCC4/CLEC5A/TNIP1/PACS2,  
I/AP1G2/RPS19/IKBKG/AXL/AP1B1/FADD/RPLP0/RPL18/TBKB1/CBL/RPL23/ABI2/CLEC7A/RACI  
QR7/RNF2/THRA/VDAC2/ERCC1/RAB3A/PRSS21/HEXB/MASTL/BCL2L1/GLI1/MEA1/SSTR2/UBE2Q  
3/PSMB5/PSMA4/HSP90AA1/ACVR1B/PSMD9/DNM2/ADAM17/CDK2AP2/DCTN1/CCNJL/CEP164/HAU  
2/IL4R/VPS18/ALDOC/TGFB3/SYT1/APP/LAIR1/ADRA2A/PNP/CYSTM1/PPFIA3/XRCC6/DNM1L/P  
ZMB/GPATCH3/PSMD3/PSMD7/RPS19/IKBKG/AXL/FADD/BTK/PELI1/STX4/TBKB1/TREM1/CLEC7A,

2/CCL3/PRPF19/ZNF335/OVOL2/LIMS1/ACVR1/AKIRIN1/CBFA2T2/ABL1/SART1/VHL/STMN2/RAS/  
PP2R5B/INTS7/CDK5R1/PSMC3/RBM14/APBB1/CHFR/INHA/PRKAG1/HINFP/FAP/RUNX3/PSMC5/T  
7/MAP3K10/PIH1D1/TARBP2/DGKQ/CDC37/CDK5R1/PPM1F/PRKAR1B/TPD52L1/DAXX/RHOA/STK3,  
8/DOCK2/TNFRSF14/ID01/RUNX3/ZMIZ1/LYL1/RBPJ/CCL19/XCL1/NOTCH2/PIK3R6/DOCK10/MSI

3G1/PSMD9/LMO4/TUSC2/PTPN2/THBS1/ADAM17/PUS7/CASP8/NOTCH1/PDCD2/TMEM98/MYL9/HOX/

L

)/TRIM37/IFRD1/PACSIN1/CDK5R1/ARHGAP28/HNRNPA1/UBR5/TWIST1/RBM14/PLEKHH2/RHOA/RI  
CL2/CMKLR1/APP/ADRA2A/SWAP70/DPEP1/TRPM4/SEMA4F/RPS19/FADD/ECM1/STX4/SEMA5B/ANC

IR/MAPT/STK38/RUBCN/CSPG4/DBF4B/NF2/CEMIP/PTGES3/TRAFF7/EEF1A2/CXCL17/PKIA/ABL1/  
TNFSF15/CASP8/PDCD2/RGP1/HNRNPU/TBC1D22B/ARHGEF11/VEGFA/RAB3A/SMAP1/PLA2G1B/FN

NPJ/KIF22/ARL8B/PARD3/CACNA1D/CC2D2A/VPS11/AP3B1/YWHAG/IFT20/STXBP1/B9D1/ACTN4/C  
2/GEM/UNC13A/TTL/BICD2/RAB6A/GRIPAP1/NEFH/RASGRP1/FEZ1/NEFL/MYH9/CHMP4A  
3GA/TLR2/LZTS1/LG14/HSPA5/DDX56/GLI1/RAB11A/ZPR1/RAB29/KIF20B/IFRD1/PACSIN1/NO

JM2/PTK2/STYXL1/NOTCH1/TMEM98/S1PR3/FIG4/MOB2/OLFM4/LLPH/VEGFA/TLR2/LZTS1/HSPA5,  
T/KHDRBS1/NF2/KCNAB2/CEMIP/PKIA/ABL1/EMD/PIM3/WRAP53/MFF/NSFL1C/CALM2/PDCD10/S  
IP1/BTBD10/PTTG1IP/IGF1R/TFAP2A/WNT4/PELI3/HSPD1/ANKLE2/BTG2/GRINA/ACVR1/PIDD1/  
0AA1/ATP10D/SGTA/DNM2/SPIRE1/THBS1/DCTN1/VPS35/CASP8/RPS27A/UGCG/TMEM11/CFTR/A



2/VCP/VHL/WSB1/PSMA1/TNFAIP3/USP5/RPS7/COPS6/FOXF2/BAG2/CLSPN/TBC1D7/RNF216/PSMI  
2/164/ODF2L/HAUS7/RPF2/VDAC3/BICD1/SH3GLB1/HNRNPU/NEBL/RPL6/MARK4/HAUS5/RILPL1/D  
2/RPL30/EPHA2/MRAP2/TFDP1/ITGAL/RPS9/CAV1/RAB13/RPS14/CALM3/EPHB2/GET4/RPS27/CH  
31/TPD52L1/DAXX/STK3/NEK6/EMC10/RAPGEF1/RNF8/MINK1/DHX9/DNAJC2/RSL1D1/TIGAR/CCAI  
2/7D3/ADD3/LIMA1/CD2AP/RAB11A/CCDC88C/ACAN/EML2/MECP2/CENPJ/PACSIN1/CDK5R1/ARHGAI  
/TWSG1/CTNNA1/PTK2/PTPN2  
MAPK15/HAUS2/IQCG/DOCK11/ATG3/CDK5RAP2/RHOD/EP8L2/VAV3/CARMIL2/PLXNB3/SHTN1/PTI  
/CCL19/IST1/ARF1/KLF5/SNX3/HTT/CAV1/ATP7A/DAB2IP/PREX1/DZIP1/EPHB2/CIB1/PLD1/ARI  
1/BANF1/SIRT7/CENPK/HAUS8/PML/DYNC1L1/DSN1/CIT/PRCC/PLK4/ANAPC11/MAP4/UBE2D1/TI  
2/PSMC2/MED1/PSMA6/NUDT21

5TX4/SEMA5B/ANGPT2/CLEC7A/RACK1/SEMA3C/GPR183/SEMA3E/IGF1R/LBP/PDCD6/WNT4/EPPK1,  
3PATCH1/PDCD7/CLP1/NUDT21/RBM4  
07/CLP1/NUDT21/RBM4  
07/CLP1/NUDT21/RBM4

.FM4/CYB5R3/GLIPR1/RAB3A/HEXB/PLA2G1B/TLR2/CSNK2B/TMBIM1/SLC15A4/ANXA3/AP2A2/ATI

3C4E/BAG6/ZCCHC3/BTN2A1/NFKBIL1/PIK3CB/MYO1C/PSMB1/NCKAP1/PLCG1/TLR8/EIF2B4/MAP  
THOC3/AURKAIP1/SREK1IP1/POLR2B/BUD13/GEMIN6/SYNCRIP/SMN2/HNRNPA2B1/SUPT6H/ERCC2,

/RAB36/ARHGAP33/RALGAPB/GNAI3/DOCK8/RAB8B/RAB1B/ARHGEF18/NCKAP1/LPAR1/BCR/MADD/I  
/RBM4B/YTHDF1/RBM8A/METTL3/PPARG/HNRNPA0/PSMB1/TNFRSF1B/MOV10/EIF2B4/UCN/PPP1R8,

/HEXB/TLR2/CSNK2B/TMBIM1/SLC15A4/ANXA3/HLA-F/AP2A2/ATP6AP2/SLC2A3/TSPAN14/MLEC/I  
NJL/CEP164/HAUS7/NBN/PLK3/ZFYVE19/OPTN/CCNE2/HAUS5/MASTL/LZTS1/DYNC1I2/RAB11A/ZI

3/SH3GLB1/HNRNPU/ZFYVE19/VEGFA/GNAI3/CCNE2/MARK4/HAUS5/MASTL/MIS18A/BCL2L1/CD2/  
1/EPHA2/DEDD/KITLG/GCLM/UBE4B/TFDP1/MSH6/PRKRA/PDIA3/HTT/CD5/CAV1/TMEM102/DAB2

/RPS28/ELAVL1/FASTKD1/RPS17/PNPT1/SERBP1/NUP214/PPP2CA/TNFRSF13/PAIP1/RPL22/LSM3,

3/SHQ1/NOP14/ABT1/TUT1/INTS3/NSUN2/WDR43/NSA2/CLP1/MRPS9/TSR2/INTS5/METTL8/DDX18















5/LE01/GATA3/KAT7/WAC/KANSL1

GRIP1/PTK2/PTPN2/THBS1/ADAM17/PTPN1/CCNJL/DUS2/RPS27A/NBN/HNRNPU/VEGFA/PFKFB2/CCL/ACAP3/DNMT3B

/RPS3/PRKD2/TRAF3/PSMB3/DNASE2/GRB2/ARRB2/CDC42/IL4R/TGFB3/MUC20/CMKLR1/LAIR1/TIGRA2/RPTOR/CALM3/CIB1/PKD1/BORA/PTPRC/STUB1/BMP2/PABPN1/ADCY3/RAB1A/ZNF16/ADNP/PT



RK7/BUB3/RNF144A/USP36/NUB1/UBQLN2/RNF121/WWP2/ARIH2/RNF126/TLK2/ANAPC15/PSMB7/1  
MC5/FAF1/ARRDC1/CCAR2/CTSW/SDF2L1/FBXL7/UBE2N/ANAPC5/HECTD3/AP2A1/CDC27/CDC34/H  
L/TP53/FEZ1/NDUFA7/AARS2/DNAJC11/CLEC16A/RNF41/NDUFA6/TIMM21/UQCR10/DDHD2/IMMT/5

.13A/MRPL27/MRPL28/HNRNPR/TAPBP/POLR2D/RPL37A/MTERF3/DARS2/MRPL51/MRPL11/RPLP1/I  
5/ARRDC1/FBXL7/UBE2N/ANAPC5/HECTD3/CDC27/CDC34/UBE4B/UBE2E2/SH3RF3/PEX10/RAB40C,  
NF121/WWP2/ARIH2/RNF126/TLK2/ANAPC15/PSMB7/NKD2/RNF115/SKP1/ANKIB1/RNF186/DERL1,  
STUB1/ANAPC4/VPS4A/BAG6/HUWE1/BBS7/FAF2/TMEM67/DDB1/FBXO44/SKP2/PSMB1/WWTR1/SUMC

2/DCK/MUC6/BCAN/B4GALT4/ACAN/TRMT12/MUC15/GFPT1/TMEM115/CHST3/STOML2/POMGNT2/SLC  
CARD16/MAP3K6/IKBKG/AXL/FADD/ECM1/PELI1/DSTYK/CBL/SCTR/RPL23/STK25/RACK1/MSX1/R/

OC14A/SNAP29/CCDC113/TMEM17/DYNC2H1/PKHD1/IFT74/CCDC114/CEP290/CCDC151/PAFAH1B1,

2152/DRC1/BBS5/CFAP44/LRRC49/CDC14A/SNAP29/CCDC113/TMEM17/DYNC2H1/PKHD1/IFT74/C

l26/TLK2/ANAPC15/PSMB7/NKD2/RNF115/SKP1/ANKIB1/RNF186/DERL1/KCTD13/UBR4/CUL7/RNI  
/SPACA6/SPIRE2/GLRB/ADAMTS2/RPS6/TBC1D20/ATP8B3/SMAD5/INSL3/STRBP/TRIM27/NEURL1,  
/BAG6/RFX2/SLC04C1/ADNP/CNR1/ZSCAN2/METTL3/SPACA6/JUNB/SPIRE2/ADCY7/ADAMTS2/RPS6/  
C04C1/ADNP/CNR1/ZSCAN2/METTL3/JUNB/SPIRE2/ADCY7/ADAMTS2/RPS6/CASP3/TBC1D20/SMAD5





IP/ACVR1/PTGES3/TRAF7/EEF1A2/CXCL17/HSPA2/ABL1/STK24/VCP/FCGR2B/SFRP2/BRAT1/CALN





2D/IFI6/AP2B1/LGMN/HBEGF/ELMO2/NRTN/RBPJ/STXBP4/BTC/PSEN2/EPHA2/AP2A1/EREG/SERP  
VWTR1/PIN1/UCN/PPP1R8/CASP3/ADAR/RPL11/NXN/MFHAS1/TRIM27/PHF1/PTPN13/RNF149/PARI

)/CSK/CHEK2/CLSPN/MAPKAPK3/WWC1/GDF11/CCND3/DBNL/PSAP/ERP29/HSP90AA1/ACVR1B/CDK5  
)/A/RASGRP1/TNFRSF10A/PRKAR2A/MAPKAP1/DAG1

/RPL24/ETV1/SEMA3F/MEGF8/EGR2/ULK1/MNX1/KNDC1/CELSR3/TRIM46/XK/SEMA6B/TRIO/LHX2,  
ELSR3/TRIM46/XK/SEMA6B/TRIO/LHX2/PTPRA/SEMA4C/MAP4K4/PTPRS/DOCK7/CUL7/TRAK2/PLXN  
MD8/ARPC5/ABL1/FCGR2B/PSMA1/TNFAIP3/STX7/KCNN4/CSK/ACTR3/VAMP8/MAPKAPK3/PSMB5/I

37A/RACK1/M6PR/CSNK1G2/SLC36A4/LBP/CLIP3/ARPC1A/RUBCN/ILDR1/RAB4B/ACHE/BRK1/ARPC

2/MAP3K9/NOD1/CD19/MAP4K4/MAP3K11/VAV3/PPP2R3C/ACE/MUL1/WNK1/NOD2/PPP2CA/XRCC5/C

CD177/DMBT1/VEGFA/SMAP1/TLR2/MYO6/PACSIN2/ANXA3/BCL2L1/CANX/CD2AP/AP2A2/PACSIN1/

ANGPT2/VIM/MSX1/TRIM71/PTPRF/ATP6VOD1/UBE2O/IGF1R/HNRNPM/PDCD6/ARPC1A/WNT4/TGIF2

/TRIO/LHX2/PTPRA/SEMA4C/MAP4K4/PTPRS/DOCK7/CUL7/TRAK2/PLXNB3/MUL1/SHTN1/LAMA1/USP

)/YTHDF2/RAB1A/ARHGAP33/YTHDF1/ADNP/FEZ2/METTL3/RYK/PIK3CB/ANTXR1/PLXNB2/SCARA3,  
[1/LIPT1/ESCO1/SNW1/RLF/SMYD2/ATG5/ING5/NUP160

INLY/BCL10/LOXL1/PTGER4/VCAM1/TUSC2/ADAM17/CASP8/NOTCH1/CAPN2/ADAMTS5/MAVS/IRF5,  
AK2/PLXNB3/MUL1/SHTN1/LAMA1/USP33/ACTR2/UNC13A/TTL/STRADA/NEFH/BCL11A/FEZ1/DPY5,  
INLY/BCL10/LOXL1/PTGER4/VCAM1/TUSC2/ADAM17/CASP8/NOTCH1/CAPN2/ADAMTS5/MAVS/IRF5,  
/EFCAB7/RPL11/RPL10/RPS24/RBM22/KPNA4/IMMP1L/TIMM9/LRWD1/HEATR3/RPS3A/TIMM22/USP



.C2/DAPL1/CHMP4A/FBXL2/TFEB/KAT5/SMCR8/MTDH/SVIP/MCL1/MCOLN1/ABL2/ATP6V1D/CLEC16  
/TNFAIP3/RNF216/MAPKAPK3/BAD/GNLY/BCL10/LOXL1/PTGER4/VCAM1/TUSC2/ADAM17/CASP8/NC  
MRPL28/HNRNPR/POLR2D/RPL37A/MTERF3/DARS2/MRPL51/MRPL11/RPLP1/DHX9/MAPKAPK5/COA3,  
.C2/DAPL1/CHMP4A/FBXL2/TFEB/KAT5/SMCR8/MTDH/SVIP/MCL1/MCOLN1/ABL2/ATP6V1D/CLEC16



Γ1/APBB1/CACNA1D/GLMN/VPS11/CD38/YWHAG/ATG13/IL17RA/ANP32B/TNFRSF14/DHX9/DMAP1/5

ζ/MAPKAPK3/WWC1/GDF11/PSMB5/DBNL/PSAP/PSMA4/LEMD2/ERP29/PTGER4/PSMD9/STK40/PTK2,  
↓/CD247/TLR7/HSP90B1/IRAK2/CAV1/DAB2IP/INPP5D/DUSP22/CD3G/PTPRC/NECTIN2/CLEC4E/I  
N5/PSMA3/PDE6G/AGO1/MBD2/BRD7/CELSR3/LYPD6/BCL7B/VPS29/FOX1/PSMB7/NKD2/SPIN1/ς



010/CSK/MAPKAPK3/WWC1/GDF11/PSMB5/DBNL/PSAP/PSMA4/LEMD2/ERP29/PTGER4/PSMD9/STK4(













l/PAFAH1B2/SEC13/PSMD8/EEF1A2/ABL1/VCP/IL10RA/PSMA1/NPRL3/ATG4B/TNFAIP3/USP5/UBA

SMD9/PTK2/CSNK2A1/VPS35/PTPN1/RPL5/RPS27A/PLK3/SH3GLB1/MAGEF1/RGP1/HNRNPU/MAP1A,



.2/GNAI2/NLRP3/MEN1/ARRB1/ARHGAP44





ARGE2/GNAI3/GNPTAB/SREBF1/HLA-F/RTN1/B4GALT4/VAC14/GOLPH3L/NOTCH3/GORASP2/SLC35I  
'TRPS1/TFIP11/ASXL1/IK/USP3/LRPPRC/THOC7/TTI1/IRF4/HNRNPC/LRWD1/ING2/THOC3/MYC/  
L/VCP/HLA-DOA/NPRL3/TNFAIP3/USP5/PON2/ABCB9/STX7/VAMP8/MILR1/RAB5C/GNLY/PSAP/BCI  
L/NFRKB/ARRB1/SP1/TNKS1BP1/ACTR6/RNF40/NFATC1  
MT5C/ZMIZ2/DONSON/TIPIN/MSH2/PADI2/CHD4/RUVBL2/CENPB/CCND2/EXOSC5/POLE4/RBBP4/I  
HL/RPL18/RRP7BP/GTF3C1/RPL23/UTP11/NIFK/VRK1/VCX3A/LAS1L/NOL12/UTP4/GNL3/INO80C/  
L/VCP/HLA-DOA/NPRL3/TNFAIP3/USP5/PON2/ABCB9/STX7/VAMP8/MILR1/RAB5C/GNLY/PSAP/BCI

PR/CSPG5/TMEM199/CCT8/GNB4/ATP6VOD1/NSF/RUBCN/HPSE/SLC48A1/RHEB/VMP1/CSPG4/SGSH/  
'CCDC88A/NUBP2/LRRC45/PHF1/AAAS/C2CD3/PRICKLE3/PDE4B/CNTRL/TCHP/DYNC2LI1/CEP97/I  
'CCDC85B/HNRNPU/FLI1/ZFYVE19/RAD18/GNAI3/CCNE2/MARK4/RITA1/HAUS5/MASTL/TAF1D/DDI

TPRC/CYTH3/NECTIN2/SRP68/ADD1/ASAP3/LIN7B/GNA13/RSU1/P4HB/ATP2A2/CD59/NCKAP1/C  
A1/CD207/VPS33B/VPS29/ATP6V0A1/HLA-E/ARL8A/DNAJC13/RHOD/RAB7A/CHMP6/APPL2/CYB56  
IP/SEC13/RAB3D/HVCN1/VAMP8/RAB5C/MOXD1/DBNL/PSAP/CD33/COPG2/SGTA/DNM2/SPIRE1/TNI

A10/YARS2/RPA1/RBM15B/AFF3/MECOM/CDC34/CDYL/SF3B2/NELFA/LYRM4/LSG1/POMP/SAFB2/SI

L/APP/LAIR1/PNP/GAL/CYSTM1/PPFIA3/XRCC6/PSMD3/CTSD/PSMD7/CPE/ECM1/GMFG/STX4/PRD  
AP/CD33/COPG2/SGTA/DNM2/SPIRE1/TNK2/RPS27A/CFTR/CD177/DMBT1/GLIPR1/RAB3A/GABRB3/  
'CBX8/HELLS/PCGF2/XRCC6/HMGNI/TELO2/RAD21/MTBP/RFWD3/CENPN/NABP1/RBBP7/RAD9A/RP  
RAPP2L/PIFO/MMGT1/CLIP3/CHST12/PDCD6/NSF/B4GALNT4/ABCG1/WNT4/TMEM87B/RHEB/CSPG  
A/VPS11/AP3B1/CLTC/AP1S1/AP1S3/AP1S2/AP2B1/LGMN/WDR41/IFITM3/TPP1/MANBA/GPC2/SI  
A1/VPS26A/NCSTN/MVB12B/PRF1/HLA-C/RNF144A/OSBPL9/HLA-DOB/VAMP3/RAB22A/AP5S1/CTSI  
MC1B/LRIF1/MBD1/PPP1CB/SMAD2/WBP2/REPIN1/ORC4/HELB/XRCC5/SMAD3/SETD1A/BAZ1A/TP  
EXOC3/APBB1/TPD52L1/PHEX/ARF5/RAPGEF1/STXBP1/GAK/ACTN4/ANP32A/LGMN/MTPN/KCNH2/N  
AV1/RPS14/ARHGAP22/PTPRC/CYTH3/NECTIN2/SRP68/ADD1/ASAP3/LIN7B/GNA13/RSU1/P4HB/I  
L/DENND5A/WIPI1/DBNL/COPG2/B4GALNT2/DNM2/NECAB3/SYS1/COG1/NOTCH1/VPS45/UGCG/FUT

R1/CCT8/HAUS6/NDE1/MAPT/CKAP2/EPPK1/CKAP5/OBSCN/KCNAB2/COL11A1/RAB3D/TNNI3/EMD/  
R1/CCT8/HAUS6/NDE1/MAPT/CKAP2/EPPK1/CKAP5/OBSCN/KCNAB2/COL11A1/RAB3D/TNNI3/EMD/  
'PSMD13/AGPAT2/CLTB/COMMD9/RAB10/DYNC1LI1/GALNS/DSN1/SLC44A2/KCNK9/IMPDH2/ATP6V  
NDE1/MAPT/CKAP2/EPPK1/CKAP5/OBSCN/KCNAB2/COL11A1/RAB3D/TNNI3/EMD/TBCD/VCL/CALM2/  
ML2/KIF20B/CENPJ/KIF22  
L/RPS7/RPL7A/RPS23/MYEF2/GAR1/RPS10/RBM42/DDX23/MRPS17/PSMA4/MRPS21/EIF3K/PRKAA



/CCDC93/OCRL/CTSD/AP1G2/SYT3/SH3GL1/AP3D1/STX4/WDR91/CCZ1/MY05A/M6PR/CCDC120/ATI  
3E2N/ANAPC5/TBP/MMS19/CDC27/UBE4B/PIK3R6/POLR2E/AUP1/ZER1/PELP1/MAEA/MORF4L1/KLI



2/PRSS12/EXOC3/APBB1/CACNA1D/RHOA/YWHAG/HNRNPR/ABHD17A/STXBP1/AP1S1/ATP2B4/GAK/5

1BP3/BECN1/PSEN2/MPP2/LSM1/DOCK10/GLRX2/HTT/MAGEE1/PI4K2A/ATP7A/DAB2IP/RPTOR/PRI

3/EZH1/NFATC1/MCM3AP/PLAC8  
3XIP1/WBP2/KCNIP3/PTPN14/HDAC3/MED17/SMAD3/NCOA7/MAML1/SUPT3H/AEBP1/TSG101/DDX1,  
7A/MRPL51/MRPL11/RPLP1/RPL32/COPB1/RPL30/SPTAN1/CRYBB1/CRYGS/MRPL15/MRPL4/KSR1/1  
/CNN2/ZNF207/VPS18/ALDOC/INF2/CCR5/FHDC1/MY09B/KLHL17/CETN2/DNM1L/ACTL8/PPP5C/AI  
/PI4K2A/ATR/CHKB/AK1/MAP4K2/MKNK1/EPHB2/ERCC3/CSNK2A2/EPHA10/RPS6KC1/SRPK2/IP6K2  
13/RHEB/RAB4B/HSPD1/RAD51C/EEF1A2/RAB3D/DIRAS1/DNA2/HSPA2/RHOT2/GSPT2/RAD51D/VCI  
13/RHEB/RAB4B/HSPD1/RAD51C/EEF1A2/RAB3D/DIRAS1/DNA2/HSPA2/RHOT2/GSPT2/RAD51D/VCI  
13/RHEB/RAB4B/HSPD1/RAD51C/EEF1A2/RAB3D/DIRAS1/DNA2/HSPA2/RHOT2/GSPT2/RAD51D/VCI  
3D/DIRAS1/DNA2/HSPA2/RHOT2/GSPT2/RAD51D/VCP/GNG4/GNGT2/ABCB9/DDX23/RAB5C/GTPBP3,  
JL/FBXW5/BICD1/PPP1R12C/MAVS/CTBP2/PFKFB2/CCNE2/PAK2/FNTA/SREBF1/TRAF4/BCL2L1/AI  
Z/RHOA/NEK6/GSKIP/YWHAG/ATG13/CLTC/CNPPD1/STXBP1/ATP2B4/PRKAG1/MAP3K1/MAPKAPK5/  
2A/ERCC1/GNAI3/SH3BGR1/LBR/TRAF4/CSNK2B/HSPA5/BCL2L1/CD2AP/AP2A2/CCDC88C/SSTR2/I  
.GL1/MTCP1/ARHGAP18/CABIN1/RANBP1/AHSA1/SPINK4/AGAP1/PPP1R16A/APP/DNAJB6/DPEP1/C  
34/TBC1D20/BCR/MADD/NOX1/RHOH/EIF2B1/TIAM2/ULK1/KNDC1/RAB3IP/SGAP1/TRIO/IP07/TM  
2ARD6A/FGD2/GAS8/NUP50/LZTR1/EXOC2  
02/RNF41/AP3M1/RGL1/ARHGAP44/PARD6A/FGD2/GAS8/NUP50/LZTR1/EXOC2

/CSNK2B/TBRG4/DCK/LMTK2/MAP3K10/SEPHS1/TP53RK/DGKQ/CDK5R1/NUAK1/POLR2I/CDK20/POI









24/ASXL1/STK4/TRIM32/NFKBID/NAB2/HNRNPD/NCOA6/GTF2A2/DDX20/PPRC1/PARK7/IRF4/PDCI





ZNF668/AFF3/TBP/BHLHA15/TFDP1/SUV39H1/ARID5B/KLF5/MSH6/CCAR1/BARX1/LDB1/PCGF3/HM

CAPH2/PSMB8/KIF15/PSMB10/PSMA5/POC1A/DNMT3A/PTPN6/PSMD13/CHMP3/PSMC4/BANF1/SIRT  
/RERE/CCL3/CHN1/ZNF335/LIMS1/EXT1/ABL1/STK24/TBCD/VHL/VCL/RASAL1/NFATC4/PALM/AR  
HLA-F/ATP6AP2/ALOX15B/SULF2/TWIST1/STOML2/NMI/GLMN/INHA/IL17RA/SIGIRR/TNFRSF14/I  
A2B/EPHA2/EREG/CCL19/KPNA6/XCL1/TLR7/POLR2E/OSM/IL17D/CD84/INPP5D/IL17RB/PANX2/I

3D/ARPC5/ABL1/VCP/VCL/FCGR2B/APRT/PDAP1/HVCN1/VAMP8/MILR1/BIN2/RAB5C/DBNL/PSAP/  
PDAP1/HVCN1/VAMP8/MILR1/BIN2/RAB5C/DBNL/PSAP/CD33/HSP90AA1/C12orf4/THBS1/CD177/I  
SMC3/PPIE/AGA/ADGRG3/SIGLEC9/RHOA

RPC5/ABL1/VCP/VCL/FCGR2B/APRT/PDAP1/HVCN1/VAMP8/MILR1/BIN2/RAB5C/DBNL/PSAP/CD33,  
DR1/CLEC5A/CCT8/TBC1D10C/FCGR3B/HPSE/EXOSC3/RAB4B/CCL3/S100A7/KCNAB2/GCA/HSPD1/I

3/LMO4/TUSC2/PTPN2/THBS1/ADAM17/PUS7/CASP8/NOTCH1/PDCD2/NBN/TMEM98/MYL9/HOXA5/TI

27/IFI16/PSMC4/MUC5B/CCR1/IL12RB1/COCH/CD79A/UBE2D1/IL15/PSMD10/PSMD11/PSMD1/C  
/CD22/CNPY3/MFHAS1/PLA2G6/ICAM2/PSMA3/IRF4/PDE4B/EIF2B1/CTSL/CD4/CTSB/RELA/PSMB

3P1/RBBP7/RAD9A/XRCC4/OGG1/RPA2/CUL4B/CCT8/GNL3/PPP4C/RBM17/POLD3/INO80C/TRIM25,  
31A/RAD54B/LIG3/HELB/XRCC5/SMC1A/FAAP100/ACTR2/SUPT16H/TP53/INO80E/DDX1/TDP2/COI  
WE1/PAF1/TRRAP/HDAC8/PWP1/DBB1/SUPT7L/ASXL1/USP3/MAP3K7/UCN/CHD7/PRMT5/PHF1/DPY:  
39/EXOSC10/LSM8/MAGOH/CDK11B/EXOSC7/ARL6IP4/TBRG4/DDX56/IVNS1ABP/INTS9/PIH1D1/ZI  
CASC3/RBM4B/YTHDF1/RPL13/RBM8A/METTL3/CARS2/MRPL36/MOV10/QRSL1/RPL4/SARS2/RPL41,  
3/RALA/STK10/LLGL1/GPR84/CNN2/IL4R/VPS18/ALDOC/TGFB3/SYT1/APP/LAIR1/ADRA2A/PNP/I

24/TDG/COPS6/EME2/CHEK2/CLSPN/BAD/RAD1/SFR1/CHD1L/HDAC10/SPIRE1/CEP164/RPS27A/NI  
2AP2/SPA17/CCSAP/DCTN1/HAUS7/FBXW5/KATNA1/PLK3/BICD1/HNRNPU/MAP1A/MARK4/HAUS5/M  
XW5/PLK3/HNRNPU/ZFYVE19/HAUS5/BCL2L1/DYNC1I2/RAB11A/GPR132/NEDD1/KIF20B/MECP2/C  
A5/ABL1/SFRP2/TNFAIP3/GHRHR/MTA3/FAM98B/PDCD10/BAD/TBX2/VCAM1/OSR2/PTK2/THBS1/AI  
310/SRSF7/PRPF40B/TRA2A/PRMT7/CACTIN/RSRC1/METTL16/BCAS2/SNRNP35/DDX46/ZCRB1/BRI

PSMD8/PIDD1/HSPA2/SUSD2/PKIA/PSMA1/MTA3/NSFL1C/CALM2/CHEK2/CLSPN/CEP41/CCND3/PSI  
3IK/C2CD5/MYO1C/SPIRE2/NCKAP1/LPAR1/PXN/CCDC88A/HNRNPD/DDHD1/TRIM27/PHF1/PIP4K2I  
/ANP32B/FAP/IDO1/TIGAR/FAF1/CCAR2/RBM10/ADM/BECN1/PSEN2/CDC34/TFDP1/PRKRA/PDIA3,  
/SEC13/SLC25A5/VCP/FCGR2B/RPS7/KCTD5/COPS6/SRPK1/RPL7A/RPS23/RPS10/VAMP8/RNF216,  
27A/DXO/CDK11B/EXOSC7/SREBF1/ARL6IP4/TBRG4/RPL36/UBA52/ZPR1/NANOS1/THOC2/ETF1/RI

5/LBP/CLIP3/CCL3/PELI3/PSMD8/LIMS1/IL10RA/PSMA1/TNFAIP3/CIITA/TRADD/PSMB5/BAD/P  
AURKAIP1/MRPL20/KIF5B/MYC/DMTN/CTSL/LIX1L/DYRK3/MRPL24/PRSS1/PAM16/MRPS16/HTRA2,  
AL1/WDR12/GEMIN8/PDCD11/EIF3F/HEATR3/USP36/MRPL20/AGO1/URB2/RPL14/DDX51/RPL10A/  
1B/ADD3/MYO6/PACSIN2/LIMA1/CD2AP/PACSIN1/CDK5R1/ARHGAP28/PPM1F/TNNC1/FAM171A1/TI  
/VAV3/CARMIL2/PLXNB3/SHTN1/PTPDC1/RAC3/MYO1A/ACTR2/IFT140/CNTROB/NEFH/CEP135/TM  
NK1/DOCK2/MTPN/SPTAN1/PARVB/DPYSL3/CORO2B/NOTCH2/HSP90B1/ARF1/RHOB2/GMFB/NPHP  
M64/WDR5/NKAP/PSMC3/ADGRG3/CD79B/SRF/RHOA/STK3/INHA/AP3B1/ZNF160/DOCK2/RUNX3/ZM

3/MAGEF1/RGP1/MAP1A/BNIP3L/USP27X/GGA3/HSPA5/FBXO45/EGLN2/UBA52/CD2AP/AP2A2/EDI  
)/TRIP6/TRADD/LAMA4/PLXNC1/PTGER4/ACVR1B/VASH1/SLC8B1/SRGAP2/LMO4/PTK2/THBS1/AD  
A1/SRGAP2/DNM2/PTK2/STYXL1/NOTCH1/USP21/FIG4/MAP1A/MOB2/LLPH/VEGFA/RAB3A/PAK2/I



IP1/EPHB2/CIB1/PLD1/ARHGAP33/EVI5L/PROM2/YTHDF1/ADNP/CNR1/RVK/PLXNB2/RAB8B/FSTL1/AC3/KLHL21/UBE2D2/CHFR/NMI/RASSF5/DAXX/TRIM69/GLMN/RNF8/DCAF7/PRMT3/SOCS7/CTU1/1/SERGEF/CLIP3/MAPT/ABCG1/CARD18/NF2/BTN2A2/CCL3/KCNAB2/ACHE/CEMIP/SLC25A5/PKIA/1/RPS16/SYS1/VPS35/CASP8/RPL5/RPS27A/RPF2/SRGN/TMEM98/ARFRP1/BICD1/SH3GLB1/HNRNP1/DNM1L/RBX1/UQCC2/RPS19/RPLP0/GMFG/STX4/COA6/DR1/RRP7BP/RNF4/ABI2/RALB/CENPN/RBI/DHX9/EDC4/RPL32/TNP01/RPL30/PSMC5/TIGAR/CNOT10/RBM10/MEX3D/BPGM/SEH1L/RBM24/EI1A/GTF2A2/ZNF143/WDR12/THADA/PDCD11/USP36/AGO1/RPL14/DDX51/POU2F1/PPA1/POLR2B/DU1

5B/ANGPT2/CLEC7A/RACK1/SEMA3C/GPR183/TRIM25/SEMA3E/IGF1R/LBP/PDCD6/WNT4/EPPK1/NIP1

YTHDF2/CDK5RAP1/MRPS5/CASC3/CHAC1/RBM4B/YTHDF1/RPL13/RBM8A/METTL3/CARS2/MRPL36/1AV1/DAB2IP/HMGA2/ARHGEF17/DKKL1/PREX1/INPP5D/ERCC3/PTPRC/BMP2/SRPK2/LGALS14/ZNF338/PLK3/VDAC2/VEGFA/GNAI3/BNIP3L/GABRB3/PAK2/DDAH2/COPS5/HSPA5/TMBIM1/TXNDC12/1/HTT/CAV1/DAB2IP/HMGA2/ARHGEF17/DKKL1/PREX1/INPP5D/ERCC3/PTPRC/BMP2/SRPK2/LGALS1/NOTCH1/RPS27A/FKBP8/PLK3/VDAC2/VEGFA/GNAI3/BNIP3L/GABRB3/PAK2/DDAH2/COPS5/HSPA5,

ACTR3/ARAP1/TBC1D7/DBNL/PTGER4/HSP90AA1/PRKAA2/CHD1L/MPP7/DNM2/LMO4/TCTEX1D2/PTI

/TRIM25/RPL38/RPL23A/SUPT5H/MCTS1/CCL3/UBXN1/HSPD1/SEC13/SLC25A5/VCP/FCGR2B/RPS27A/1/GADD45GIP1/VIM/XRCC4/CLEC5A/ROMO1/TNIP1/PACS2/TRIM25/RPL38/RPL23A/SUPT5H/MCTS1/TARBP2/GORASP2/TEAD3/TEX11/CD38/IFT20/STXBP1/RNF8/ATP2B4/PPAT/PRKAG1/57/NBN/PLK3/ZFYVE19/OPTN/CCNE2/HAUS5/MASTL/UIMC1/LZTS1/GLI1/DYNC1I2/RAB11A/ZPR1,3MD3/CTSD/SYT3/PSMD7/ECM1/BTK/GMFG/STX4/CBL/PRDX4/CSPG5/WDR1/CLEC5A/CCT8/TBC1D10/1/VIM/CLEC5A/TNIP1/TRIM25/POLR3D/LBP/POLR3H/POLR3C/CCL3/S100A7/CD300LB/HSPD1/ARI1

AL1/SFRP2/KDF1/TOX/BAD/DBNL/PLXNC1/ACVR1B/CTNNA1/DNM2/STYXL1/CASP8/NOTCH1/CAPN2,IPRL/CNOT10/CCAR2/FBXL7/WDR6/EIF4G2/NOTCH2/CNOT3/UXT/MUS81/TFDP1/MSH6/ATR/TP53BI/1/GSKIP/RAPGEF1/YWHAG/ATG13/CNPPD1/ATP2B4/PRKAG1/PIK3R5/MAP3K1/GPS1/MINK1/RPLP1/1H6/ITGAL/CD5/CAV1/ATP7A/TP53BP1/PKNOX1/ATAD5/THOC1/PREX1/DCLRE1C/INPP5D/HDAC5/DI

A5/THRA/ERCC1/VEGFA/ACTN1/LBR/SMAP1/TLR2/TMEM64/WDR5/NKAP/PSMC3/ADGRG3/CD79B/SRI

PL13A/CD38/STXBP1/MLLT6/GAK/ACTN4/DNMT3B/FAP/NR1H2/MTPN/SPTAN1/TIGAR/ADCY6/BECN1/3PT2/CLEC7A/RACK1/IGBP1/SEMA3C/GPR183/SEMA3E/IGF1R/LBP/PDCD6/WNT4/EPPK1/NF2/CCL:

STK24/WRAP53/SFRP2/TNFAIP3/RPS7/CALM2/PDCD10/CSK/BAG2/CLSPN/MAPKAPK3/CCND3/BAD/1/1A/PLEKHG6/ARHGAP28/PPM1F/ADPRH/NDUFA13/AGAP3/RHOA/RAPGEF1/ACAP3/STXBP5/ANP32B/1

3OSR2/RAB27B/FNBP1L/SNPH/NIN/ADORA2B/BECN1/PSEN2/SNAPIN/VPS33A/SEH1L/BHLHA15/EI1

1CH3/PPP2R5B/CDK5R1/METRIN/PARD3/APBB1/SRF/CAPRIN1/RHOA/SLC25A12/CD38/HES2/RAPGEI

/DDX56/RAB11A/RAB29/KIF20B/IFRD1/PACSN1/NOTCH3/PPP2R5B/CDK5R1/METRIN/APBB1/SRF/1/1AC/STX7/CSK/VAMP8/WWC1/BAD/CENPQ/HSP90AA1/PRKAA2/C12orf4/TCTEX1D2/VPS35/CASP8/1SLC25A5/ABL1/VHL/PIM3/SFRP2/TNFAIP3/NFATC4/PDCD10/TRADD/BAD/PSAP/BCL10/PRKAA2/C1AK1/SH3GLB1/TOMM22/GNAI3/BNIP3L/RAB3A/RCC1L/FNTA/PACSN2/BCL2L1/RILPL1/UBA52/AP:

35/SEN3/BCL10/PSMA4/HSP90AA1/PSMD9/UBA2/RPL5/RPS27A/FBXW5/USP21/CFTR/CTU2/MAGEI  
YNC1I2/RAB11A/NEDD1/TRIM37/CENPJ/GORASP2/TMEM138/VPS37B/SASS6/RBM14/SQLE/SRF/CC:  
31/RPL29/ZDHHC24/VPS4A/BAG6/TM9SF4/SRP68/TRAM1/C2CD5/RPL13/LIN7B/ATP1B1/SSR1/MY  
R2/RPA1/UBE2N/CORO2B/MMS19/MECOM/CCL19/SEH1L/UBAC2/SH3RF3/ATG7/MAP4K1/CAV1/ATR/  
P28/PPM1F/FAM171A1/SRF/DSTN/PLEKHH2/RHOA

PDC1/MY01A/ACTR2/IFT140/CNTROB/CEP135/TMEM80/PIP5K1A/SH2B1  
HGAP33/EVI5L/YTHDF1/ADNP/CNR1/RYPK/PLXNB2/FSTL4/NCKAP1/MOV10/PPP1R9A/LPAR1/PLEKH

JBG2/KLHDC8B/PSMD10/PSMD11/NES/RAE1/CDKN2C/PSMD1/DONSON/TIPIN/KIF2A/ODF2/CDK7/M:

/NF2/CCL3/S100A7/EMILIN1/CEMIP/ACVR1/CXCL17/AKIRIN1/ABL1/STK24/VCL/SFRP2/CYP19A

P6AP2/SLC2A3/TSPAN14/MLEC/PSMC3/PPIE/AGA/ADGRG3/SIGLEC9/RHOA

3K7/NFKBID/PSMB6/FFAR2/CD22/CNPY3/MFHAS1/PLA2G6/ICAM2/PSMA3/IRF4/PDE4B/EIF2B1/C  
/U2AF1L4/ELAVL1/LUC7L3/SRSF3/PNPT1/UBL5/TRA2B/HNRNPPL/SUGP1/ZRANB2/GEMIN5/SAFB/

PARK7/RHOH/F2RL2/BRAP/SETDB1/RAB22A/TIAM2/RAB3C/KNDC1/ARHGAP19/ARL3/ARHGAP25/RAI  
/OGFOD1/PSMB6/ADAR/UNK/LRPPRC/POLDIP3/ENC1/RPL10/KLHL25/HNRNPD/LSM14B/NEURL1/EI

P3SMC3/PPIE/AGA/ADGRG3/SIGLEC9/RHOA

P3R1/GPR132/CRLF3/NEDD1/MECP2/CENPJ/PSMC3/TPD52L1/NEK6/YWHAG/PPAT/HINFP/PSMC5/CN

AP/RAB11A/NEDD1/KIF20B/CENPJ/MITD1/ARL8B/KLHL21/PARD3/CDK20/NCAPD3/CHFR/TEAD3/RI

IP/ATAD5/CIB1/CSNK2A2/PTPRC/BAG6/CHAC1/BIK/TFPT/BDKRB2/P4HB/TNFRSF1B/MNT/STK4/TI

/TARDBP/RPS15A/SMG8

3/SAGE1/GEMIN4/TSEN2/TRPT1















CNE2/PLA2G1B/PAK2/TRAF4/CSNK2B/UBA52/DUSP7/MAP3K10/PIH1D1/TARBP2/DGKQ/CDC37/CDK1

LR5/PSMD4/HK1/CD48/XRCC6/GPATCH3/TRPM4/PSMD3/PSMD7/CD8A/LILRB4/RPS19/IKBKG/FADD,  
IK3CB/PIN1/ADCY7/PPP1R9A/LPAR1/STK4/MAP3K7/UCN/CCDC88A/COPS8/NAB2/HNRNPD/MADD/NI



NKD2/RNF115/SKP1/ANKIB1/RNF186/DERL1/KCTD13/ZMPSTE24/UBR4/PNPT1/CUL7/RNF19A/BAP.  
SP90B1/USP48/UBE4B/UBAC2/AUP1/MAEA/CACUL1/EGF/HSPA13/CAV1/NEDD8/DAB2IP/GET4/FBXO  
SDHAF1/COX7A2L/ADGRG6/COX10/STOX1/STAT3/PANK2/CHCHD6/CHCHD4/HPS4/NDUFB7/GABARAP,

DXH9/MAPKAPK5/TPP1/COA3/RPL32/MTPN/RPL30/CNOT10/YARS2/MEX3D/MRPL15/BECN1/C12orf6  
/MAEA/ATG7/RNF114/KLHL12/PEF1/CAV1/UBAC1/NEDD8/PCGF3/TRIM68/PARP10/FBXO6/FBXO41,  
/KCTD13/ZMPSTE24/UBR4/CUL7/RNF19A/BAP1/USP33/USP24/FBXL18/TSG101/FBXL2/CDC16/KAT5  
/USP3/FBXO10/TRIM32/PSMB6/RPL11/ENC1/CDC23/KLHL25/MVB12B/RNF149/PSMA3/PARK7/BIRC

C25A12/SLC35C2/FUT11/CLTC/XXYLT1/PPAT/GMPPB/PRKAG1/HBEGF/GPC2/NME4/PMM2/TYW3/TIO  
AD9A/IL20RA/GPR183/TRIM25/IGF1R/HPSE/RHEB/CSPG4/CCL3/S100A7/SEC13/LIMS1/TRAF7/C

/ARL6/PCM1/RAB8A

CDC114/CEP290/CCDC151/PAFAH1B1/ARL6/PCM1/RAB8A

F19A/BAP1/USP33/USP24/FBXL18/TSG101/FBXL2/CDC16/KAT5/UBE2R2/RAD23A/SVIP/PPP1R11,  
/DDX20/AAAS/PARK7/ING2/IGF2R/GMCL1/DUSP13/FIGNL1/NPHP1/SPIN4/NR6A1  
5/CASP3/TBC1D20/SMAD5/INSL3/STRBP/TRIM27/PLA2G6/NEURL1/DDX20/ING2/IGF2R/GMCL1/DI  
5/INSL3/STRBP/TRIM27/PLA2G6/NEURL1/DDX20/ING2/IGF2R/GMCL1/DUSP13/MBD2/FIGNL1/NPI







12/PDCD10/CSK/CHEK2/CLSPN/MAPKAPK3/WWC1/GDF11/CCND3/BAD/DBNL/PSAP/BCL10/ERP29/H



INA12/POLR2E/ARID5B/CAV2/EGF/DAB2IP/ATP6V1B2/GTF2F1/EPHB2/SLC9A6/CNKSR1/EPHA10/!  
7/BCOR/MYC/MLLT1/DMTN/PRMT6/HYAL2/IFNG/RELA/EIF4G1/IP07/SUPT6H/KDM3A/DUSP14/RG!

2AP1/TWSG1/TNFSF15/PTK2/THBS1/ADAM17/TNK2/PTPN1/NOTCH1/RPS27A/NBN/MAVS/MOB2/VEGf

/PTPRA/SEMA4C/MAP4K4/PTPRS/DOCK7/PNPT1/CUL7/TRAK2/PLXNB3/MUL1/SHTN1/LAMA1/USP33,  
NB3/MUL1/SHTN1/LAMA1/USP33/ACTR2/UNC13A/TTL/STRADA/NEFH/BCL11A/FEZ1/DPYSL2/NEFL,  
3CL10/PSMA4/SPPL3/HSP90AA1/PSMD9/PTK2/PTPN2/CASP8/RPS27A/CD177/MAVS/DMBT1/PLA2G

35/SUSD2/ABL1/FCGR2B/IL10RA/CSK/ACTR3/RUFY1/MAPKAPK3/BIN2/RAB5C/DBNL/HOOK2/HSP90

CARD14/RASSF2/MAP3K12/PDE5A/AFAP1L2/STRADA/RASGRP1/TNFRSF10A/PRKAR2A/MAPKAP1/DA

/DGKQ/PLD2/PRSS12/WIPF2/RAPGEF1/CLTC/ENPP2/AP1S1/XKR8/GAK/ACTN4/SNX17/RAB27B/AP;

2/CSPG4/GLG1/CHN1/EMILIN1/BRK1/OVOL2/ACVR1/ARPC5/ABL1/SFRP2/GHRHR/NFATC4/ACTR3/,  
SP33/ACTR2/UNC13A/TTL/STRADA/NEFH/BCL11A/FEZ1/DPYSL2/NEFL/ARPIN/DAG1/DVL1/ANOS1,

/KIF3A/FSTL4/PLCG1/PPP1R9A/CNP/NCAM1/PXN/RPL24/CASP3/TBC1D20



/DMBT1/OPTN/BNIP3L/PLA2G1B/OAS3/TLR2/SLC17A5/IVNS1ABP/ANXA3/BCL2L1/IFNAR2/RAB29,  
SL2/NEFL/DAG1/DVL1/ANOS1/LRP4/SYT17/WNT5A/LRP2/PPP3CB/ARHGAP44/OLFM1  
/DMBT1/OPTN/BNIP3L/PLA2G1B/OAS3/TLR2/SLC17A5/IVNS1ABP/ANXA3/BCL2L1/IFNAR2/RAB29,  
P36/NMT1/RPL14/AGPS/SRP19/PAM16/HYAL2/RPL10A/HTRA2/IFNG/ARH2/TERF1/IP07/RPL12/!

3A/VTA1/RNF41/TICAM1

OTCH1/CAPN2/ADAMTS5/MAVS/IRF5/DMBT1/OPTN/BNIP3L/PLA2G1B/OAS3/TLR2/HSPA5/SLC17A5,  
/RPL32/MTPN/RPL30/CNOT10/YARS2/MEX3D/MRPL15/C12orf65/PARS2/HARS2/MRPL4/RBM24/DPI  
3A/VTA1/RNF41/TICAM1



STXBP4/ADCY5/CORO2B/CCL19/DPH3/ARF1/TFDP1/UBAC2/OSM/SNX3/HAX1/FRMD4A/DNAJC1/ENS,

/PTPN2/THBS1/PTPN1/NOTCH1/RPS27A/VEGFA/PLA2G1B/PAK2/TRAF4/COPS5/UBA52/DUSP7/MAP:  
3AG6/ZCCHC3/BTN2A1/NFKBIL1/PIK3CB/MYO1C/PSMB1/SCARA3/CD59/NCKAP1/PLCG1/TLR8/EIF:  
SKP1/FZD9/GNG2/RGS4



)/PTK2/PTPN2/THBS1/PTPN1/NOTCH1/RPS27A/VEGFA/PLA2G1B/PAK2/TRAF4/COPS5/UBA52/DUSI













QLN4/RPS7/FOXF2/MYEF2/BAG2/CHEK2/PSMB5/BAD/SGSM3/PSAP/PSMA4/HSP90AA1/PRKAA2/SGT.

/OPTN/PFKFB2/GNAI3/EXOSC9/BNIP3L/DXO/LZTS1/EXOSC7/SREBF1/TBRG4/TRIM21/UBA52/EDEI









31/SLC35A4/TMEM115/CHST3/TMEM87A/GOLT1B/ZDHHC9/ERGIC3/TMEM130/COPB2/FUT11/IFT20,  
YY1AP1/MBD2/HUS1/POLR2B/FIGL1/BRD4/ASF1A/MAX/RELA/TERF1/SMC1B/LRIF1/MBD1/PPP1C1  
L10/HSP90AA1/VPS35/CAPN2/SRGN/CFTR/MAN2B1/MCOLN3/CYB5R3/CCZ1B/GNAI3/GLIPR1/RAB3,

POLA1/TBX19/DFFA/UBE2A/SMARCC1/MCM8/BRD9/KAT2A/ZNF207/BEND3/CBX5/CHMP1A/TOBP1/1  
/BTBD10/MYBBP1A/HNRNPM/SLBP/RPL23A/EXOSC3/VMP1/CKAP5/NF2/EID3/DNTTIP2/SNRPB2/CH  
L10/HSP90AA1/VPS35/CAPN2/SRGN/CFTR/MAN2B1/MCOLN3/CYB5R3/CCZ1B/GNAI3/GLIPR1/RAB3,

/S100A7/GCA/SEC13/EEF1A2/RAB3D/HPS1/VCP/HLA-D0A/NPRL3/TNFAIP3/USP5/UBQLN4/PON2/1  
DYRK3/EYA3/ARL3/TTL5/MAMLD1/JTB/HAUS2/PPP1R12A/SKP1/CDK5RAP2/CCDC8/MAP3K11/UBR  
AH2/BCL2L1/RILPL1/DYNC1I2/RAB11A/PLEKHG6/CCDC88C/NEDD1/KIF20B/MECP2/CENPJ/SASS6,

ASK/LAYN/RPL4/RPL9/PXN/CSRP2

IA3/SLA2/SORCS2/CPTP/TSG101/GRIPAP1/APH1A/GGA2/STOML1/FCGR1B/CHMP4A/ECE1/MCOLN1,  
K2/RPS27A/CFTR/CD177/DMBT1/GLIPR1/RAB3A/GABRB3/CYB5R1/TLR2/SREBF1/MYO6/PACSIN2/

AP130/MORF4L1/POLE2/EP400/ATR/TP53BP1/SRCAP/PRPF4/THOC1/SFMBT2/HDAC5/CBY1/EIF2D,

K4/MYO5A/CLEC5A/CCT8/TBC1D10C/FCGR3B/HPSE/RAB4B/S100A7/KCNAB2/GCA/HSPD1/PAFAH1B;  
/CYB5R1/TLR2/SREBF1/MYO6/PACSIN2/TMBIM1/SLC17A5/SLC15A4/ANXA3/BCL2L1/UBA52/HLA-  
A2/DPF2/POLD3/INO80C/TIMELESS/POLR3D/NDE1/ZWILCH/ARPC1A/EXOSC3/CKAP5/SUV39H2/EI  
4/GLG1/MFNG/FUT1/SEC13/LFNG/EXT1/NSFL1C/LPCAT2/PDCD10/APOO/ARAP1/DENND5A/WIPI1/1  
PNS1/BRI3/HEXA/SNAPIN/AP2A1/IST1/VPS33A/SEH1L/VASN/TLR7/NAPG/ATP11A/EGF/PI4K2A/1  
L/CTSB/ANXA1/CD207/VPS33B/VPS29/ATP6V0A1/HLA-E/ARL8A/DNAJC13/RHOD/RAB7A/CHMP6/AI  
53/INO80E/TARDBP/KAT5/ETV3/SUZ12/APEX1/BAZ1B/HMGXB4/TAF4/SLX4/POLD2/ACTR8/NACC2,  
K2/FAF1/MEX3D/PSEN2/SNAPIN/TMEM184A/HECTD3/VPS33A/HSP90B1/ARF1/PRKRA/RAB40C/CC  
ATP2A2/CD59/NCKAP1/CASK/LAYN/RPL4/RPL9/PXN/CSRP2

3/SCAMP2/ARFRP1/PLK3/GALNT7/BICD1/SH3GLB1/RGP1/FIG4/OPTN/LARGE2/GNAI3/GNPTAB/SRI

IBCD/VCL/CALM2/AKNA/BAG2/KRT10/SRPRB/DBNL/BCL10/HOOK2/BOD1/CSPP1/DNM2/ARHGEF25/1  
IBCD/VCL/CALM2/AKNA/BAG2/KRT10/SRPRB/DBNL/BCL10/HOOK2/BOD1/CSPP1/DNM2/ARHGEF25/1  
JC/PSMD11/SPESP1/PSMD1/C5AR1/TMEM63A/PADI2/SYT12/TRAPPC1/GSDMD/ABCA3/ICA1/STK10,  
/AKNA/BAG2/KRT10/SRPRB/DBNL/BCL10/HOOK2/BOD1/CSPP1/DNM2/ARHGEF25/CDK2AP2/CCSAP/1

2/RPS15/PRKRIP1/RPS16/RBM45/MRPS15/EIF3M/PRPF38A/BTBD2/RPL5/RPS27A/NOL6/MRPL18/1



36VOD1/MMGT1/CLIP3/PDCD6/RASSF9/RUBCN/ABCG1/SLC48A1/RAB4B/NF2/SNX11/HSPD1/GGA1/IL12/POLE2/EP400/PEF1/PCGF3/GTF2F1/PAGR1/FBX06/TAF3/ERCC3/ENY2/STUB1/ANAPC4/ZNF



STXBP5/RAB27B/AP2B1/MINK1/SNPH/ATG9A/TMUB1/RPL30/SSPN/PSMC5/BCAS1/PSEN2/SNAPIN/I

EX1/EPHB2/CIB1/SLC9A6/SACS/HRH1/ARHGAP33/CASC3/VPS16/ADNP/RBM8A/MAGOHB/TNFRSF1B,

/TBPL1/TDP2/TAF11/KAT5/MTDH/C1QBP/APEX1/MED14/ZNF85/TAF4/NACC2/MAML2/GATA4/EZH1,  
MMS19/EDIL3/SEH1L/COPA/NPNT/NPHP4/RPS9/CAV2/CAV1/RPS14/RPS27/KRT15/MRPS24/CD3G/1  
FAP1/FUS/PDCD5/EPB41L1/KATNB1/AXL/GMFG/ABI2/MYO5A/WDR1/OGG1/EPB41L3/FMNL3/NDE1/1  
2/STK35/VRK2/PIK3CB/AK6/ADCK2/CSNK1G1/CASK/STK4/MAP3K7/PSKH1/RIOK1/PPIP5K1/BCR/1  
2/GNG4/GNGT2/ABCB9/DDX23/RAB5C/GTPBP3/HSP90AA1/CHD1L/GPN2/DNM2/RASL12/TOR2A/DQX  
2/GNG4/GNGT2/ABCB9/DDX23/RAB5C/GTPBP3/HSP90AA1/CHD1L/GPN2/DNM2/RASL12/TOR2A/DQX  
2/GNG4/GNGT2/ABCB9/DDX23/RAB5C/GTPBP3/HSP90AA1/CHD1L/GPN2/DNM2/RASL12/TOR2A/DQX  
/HSP90AA1/CHD1L/GPN2/DNM2/RASL12/TOR2A/DQX1/DCTN1/NBN/CFTR/ARFRP1/KATNA1/NVL/RAI  
2A2/PIH1D1/ZPR1/IFNAR2/CENPJ/CACNB3/DGKQ/CDC37/CDK5R1/PRKAR1B/DAXX/RHOA/NEK6/G  
PRKB/ELMO2/FAF1/ADCY6/BECN1/AP2A1/KSR1/FIZ1/CD247/RHOBTB2/CACUL1/CAV2/CAV1/MAP  
KIF20B/MECP2/RBMX/CENPJ/MITD1/AIP/HNRNPA1/TLN1/TWIST1/POLR2J/RHOA/VPS11/RAPGEF1,  
RPEL2/CDC42EP2/CBX8/MYO9B/OCRL/DMPK/DNM1L/PSMD3/PGAM5/PPP1R15A/CARD16/PDCD5/GM  
MEM127/PDE6D/TBC1D25/DENND6A/EIF2B2/DOCK11/EPS8L2/KCTD13/DOCK7/MAP3K11/VAV3/DOC1



LR2J/STK3/NEK6/POLR2D/GAK/GMPPB/PRKAG1/MAP3K1/CTU1/MINK1/MAPKAPK5/PHKA2/GTF2H1/1







011/EGR2/BCOR/CAND1/MYC/BRD7/WWP2/BRD4/ZNHIT3/RELA/NSD1/LHX2/CNOT2/AKAP8/MED30/1





MGA2/RPTOR/GRWD1/HDAC5/SIX5/THAP11/TAF1B/LITAF/ZCCHC3/IKZF3/RFX2/SNAI3/PAI1



7/CENPK/HAUS8/PML/DYNC1LI1/DSN1/TUBB2B/CIT/PRCC/PLK4/ANAPC11/MAP4/UBE2D1/TUBG2/ AP1/CDH24/KEL/DBNL/PLXNC1/HSP90AA1/SRGAP2/DNM2/PTK2/NOTCH1/SSH2/ZMYM3/MAP1A/OLFI DHX9/ID01/HEG1/RBPJ/ADORA2B/EPHA2/EREG/CCL19/KPNA6/SEH1L/XCL1/CD247/TLR7/POLR2E, PTPRC/LITAF/CLEC4E/CRLF2/ZCCHC3/NFKBIL1/TNFRSF1B/PIN1/ADCY7/TLR8/MAP3K7/UCN/TRI

CD33/PTGER4/HSP90AA1/C12orf4/NBN/TMEM98/CD177/MAN2B1/OLFM4/CYB5R3/ERCC1/GLIPR1/ MAN2B1/OLFM4/CYB5R3/GLIPR1/RAB3A/HEXB/TLR2/CSNK2B/TMBIM1/SLC15A4/ANXA3/AP2A2/AT

/PTGER4/HSP90AA1/C12orf4/NBN/TMEM98/CD177/MAN2B1/OLFM4/CYB5R3/ERCC1/GLIPR1/RAB3, PAFAH1B2/RAB3D/ARPC5/VCP/VCL/FCGR2B/APRT/PDAP1/HVCN1/STX7/VAMP8/MILR1/BIN2/RAB5

HRA/ERCC1/VEGFA/ACTN1/LBR/SMAP1/TLR2/TMEM64/WDR5/NKAP/PSMC3/ADGRG3/CD79B/SRF/RH

5AR1/HLA-B/MSH2/PSMA7/RPS3/PRKD2/TRAF3/PSMB3/GRB2/ARRB2/CD6/CDC42/IL4R/CALR/MUC, 7/KLHL6/PRAM1/SKP1/EIF2B2/NOD1/CD19/TRIM15/PRKCB/BPIFB1/PTPRS/PIK3R2/CLEC4A/VAV,

/TIMELESS/SLBP/LONP1/EXOSC3/DBF4B/SSBP1/EID3/PIWIL4/ACHE/PRPF19/HSPD1/ESCO2/RAD, PS7A/ASCC3/KAT5/TREX2/RAD23A/APEX1/FAM168A/SETMAR/TAOK1/SLX4/POLD2/ACTR8/MEN1/N, 30/NAA60/IRF4/HNRNPC/LRWD1/ING2/USP36/BCOR/SETDB1/MYC/CENPT/MBD2/PRMT6/BRD7/EYA, PR1/SEPHS1/TRMT12/THOC2/TARBP2/RBMX/TP53RK/INTS7/ZRSR2/HNRNPA1/PP1E/POLR2I/UTP2, /RPL9/MRPL14/RPS6/EIF2B4/UCN/RPL24/OGFOD1/GTPBP1/UNK/LRP1R/POLDIP3/RPL11/ENC1/ CYSTM1/PPFIA3/XRCC6/DNM1L/PSMD3/CTSD/SYT3/PSMD7/ECM1/BTK/GMFG/STX4/CBL/PRDX4/MY

3N/PLK3/MAGEF1/PIAS4/RAD18/ERCC1/C9orf116/MASTL/TMEM109/UIMC1/MYO6/COPS5/FBXO45, AP7D3/DYNC1I2/RAB11A/ZPR1/CCDC88C/TUBB3/EML2/TRIM37/KIF20B/MECP2/CENPJ/KIF22/CDI ENPJ/BTG3/PSMC3/CHFR/NEK6/YWHAG/CLTC/FAP/LGMN/PSMC5/CNOT10/BTC/BECN1/FBXL7/ANAP DAM17/CSNK2A1/NOTCH1/PDCD2/S1PR3/HNRNPU/STAT5A/RPS4X/VEGFA/GNAI3/PLA2G1B/HSF4/TI DT/PCBP2/PSIP1/SMU1/AAR2/PRPF40A/AKAP17A/XAB2/ECD/SYF2/RBM15/PTBP2/SNUPN/HNRNPH

MB5/RAD1/PSMA4/HSP90AA1/PSMD9/CSPP1/ADAM17/CDK2AP2/CCSAP/CSNK2A1/DCTN1/CEP164/H, 3/PLA2G6/PARK7/ING2/SURF4/USP36/NMT1/SETDB1/KIF5B/ULK1/BRD7/BRD4/HTRA2/ANXA1/AR /ATG7/HTT/CAV1/DAB2IP/HMGA2/ARHGEF17/DKK1/PREX1/INPP5D/ERCC3/PTPRC/BMP2/SRPK2/ /PTBP1/PSMB5/BAD/ACOT8/PSMA4/RPS15/SGTA/RPS16/VPS35/CASP8/USF1/RPL5/NOTCH1/RPS2, 3MX/ZRSR2/RPL19/HNRNPA1/PSMC3/PP1E/POLR2I/RPS11/POLR2J/EXOSC1/EIF3E/SRF/RPUSD3/

SMA4/HSP90AA1/VCAM1/PSMD9/TNFSF15/PTPN2/ADAM17/CASP8/TXNDC17/PTPN1/RPS27A/UGCG/ /WDR45/MRPL55/CHCHD1/TBC1D25/MRPS2/PRKCB/ATG3/KIF9/CNEP1R1/PRSS2/ZMPSTE24/CARMI, ZNHIT3/GEMIN6/SMN2/CNOT2/ZNF622/RPL12/MRPS2/RRP15/WDR3/RPS28/LUC7L3/RPS17/NOLC1, LN1/WIPF2/SRF/CACNA1D/DSTN/PLEKHH2/RHOA/MRAS/ACTN4/PDPN/MINK1/FNBP1L/DOCK2/MTPN, EM80/PIP5K1A/SH2B1

4/HAX1/RAB13/ARHGEF17/PREX1/ARFGEF1/ARHGAP17/FRMD6/LLGL2/VPS4A/ADD1/ASAP3/MYO1C, IZ1/LYL1/PSMC5/RBPJ/BPGM/EPHA2/KITLG/MECOM/CCL19/VPS33A/EIF6/NOTCH2/PIK3R6/DOCK

EM2/TRPC4AP/PCYOX1L/RNF213/RHBDD3/PSMC3/VPS37B/USP11/UBE2D2/NDUFA13/NRDC/CHFR/A AM17

LZTS1/HSPA5/FBXO45/DDX56/WDR5/PHGDH/RAB11A/ZPR1/TUBB3/RAB29/KIF20B/IFRD1/MECP2/

4/NCKAP1/MOV10/PPP1R9A/LPAR1/PLEKHM1/CCDC88A/SEMA3F/NEURL1/MEGF8/TCHP/KNDC1/DMT1/UBE2F/MED7/UNKL/ZMIZ1/PSMC5/ARRDC1/FBXL7/UBE2N/ANAPC5/HECTD3/CDC27/SEH1L/CDC34/ABL1/EMD/FCGR2B/PIM3/WRAP53/TNFAIP3/MFF/NSFL1C/PDCD10/STAC/STX7/KCNN4/CSK/VAMP8/UBN1/NVL/RPS12/TOMM22/MAP1A/MAVS/RPS4X/RPL6/OPTN/BNIP3L/MARK4/RPL37/RPL27A/GNPTAB/UBP7/SNRPG/TMEM199/RPA2/CUL4B/NDE1/RPL38/CLIP3/DRG1/MAPT/ARPC1A/PRPF31/RPL23A/NDUFA6/CNOT3/MUS81/LSM1/SMUG1/ENTPD1/RPS9/RNASEH1/SND1/PGM2L1/KHSRP/RPS14/PGAM1/RPS31L/RPL10A/ZNHIT3/RELA/SPIN1/HNRNPA2B1/THUMP2/RRP15/POU2F2/SMAD2/SNAPC5/WDR3/RPL10A/

F2/CCL3/S100A7/EMILIN1/CEMIP/ACVR1/CXCL17/AKIRIN1/ABL1/STK24/VCL/SFRP2/CYP19A1/

MOV10/QRSL1/RPL4/SARS2/RPL41/RPL9/MRPL14/RPS6/EIF2B4/UCN/RPL24/OGFOD1/GTPBP1/UNIB346/IP6K2/BIK/CNR1/GNA13/PPARG/PIK3CB/TFPT/TNFRSF1B/PIN1/ARHGEF18/PLCG1/LPAR1/SIVNS1ABP/BCL2L1/UBA52/PIH1D1/ZPR1/PRDX5/MEIS3/MECP2

14/ZNF346/IP6K2/BIK/CNR1/GNA13/PPARG/PIK3CB/TFPT/TNFRSF1B/PIN1/ARHGEF18/PLCG1/LIN28B/TMBIM1/TXNDC12/IVNS1ABP/BCL2L1/UBA52/PIH1D1/ZPR1/PRDX5/MEIS3/MECP2/NDUFA13/TWIST1/

K2/SPIRE1/THBS1/CCSAP/STYXL1/DCTN1/VPS35/NOTCH1/ODF2L/VDAC3/SH3GLB1/HNRNPU/THRA

7/CALM2/KCTD5/COPS6/SRPK1/RPL7A/RPS23/RPS10/VAMP8/RNF216/PTBP1/PSMB5/BAD/ACOT8/INSL1/S1/CCL3/UBXN1/HSPD1/SEC13/SLC25A5/VCP/FCGR2B/RPS7/CALM2/KCTD5/COPS6/SRPK1/RPL7A

/GPR132/CRLF3/NEDD1/MECP2/CENPJ/PSMC3/TPD52L1/NEK6/YWHAG/ATP2B4/PPAT/HINFP/PSMC3/OC/ENDOD1/FCGR3B/HPSE/RAB4B/CCL3/S100A7/KCNAB2/GCA/PAFAH1B2/RAB3D/ARPC5/VCP/VCL/ND5A/PSMD8/FCGR2B/PSMA1/TNFAIP3/SRPK1/C11orf119/ACTR3/MAPKAPK3/PSMB5/BCL10/PSMA4/VCAI

/SFRP4/HNRNPU/FIG4/HOXA5/MOB2/OLFM4/LLPH/VEGFA/BCL9L/SMAP1/HSF4/TLR2/HSPA5/DDX51/PTP1/DAB2IP/HMGA2/RPTOR/THOC1

MAPKAPK5/HEG1/GTF2H1/FAF1/SH3BP5L/ADCY6/ADORA2B/UBE2N/ADCY5/KITLG/KSR1/EREG/CCL1/USP22/ZNF683/CD3G/PTPRC/CLEC4E/BAG6/IKZF3/METTL3/LOXL3/DOCK8/TNFRSF1B/CD180/RPS

F/RHOA/STK3/INHA/AP3B1/SIX1/ZNF160/PDPN/DOCK2/RUNX3/ZMIZ1/LYL1/PSMC5/RBPJ/BPGM/

1/DPYSL3/SNAPIN/CORO2B/LRPAP1/CTBP1/GMFB/ATG7/SNX3/CAV1/CAMSAP1/EPHB2/ARFGF1/C3/S100A7/EMILIN1/CEMIP/ACVR1/CXCL17/AKIRIN1/ABL1/STK24/VCL/SFRP2/CYP19A1/PDCD10

DBNL/BCL10/ERP29/HSP90AA1/TNFSF15/LMO4/PRKRIP1/PTK2/PTPN2/THBS1/ADAM17/PTPN1/CCL1/LGMN/DOCK2/DHX9/NR1H2/EPHA2/SGSM1/CCL19/XCL1/RANBP3/CCL3L3/DOCK10/NPNT/MSH6/CCL

F6/UXT/ARF1/MFN1/NPHP4/KLHL12/HTT/CAV2/PEF1/IL13RA2/SPOUT1/CD84/MAP4K2/CALM3/PAI

F1/YWHAG/GAK/SIX1

CAPRIN1/RHOA/CD38/HES2/RAPGEF1/YWHAG/GAK/SIX1/ACTN4/ACAP3/PDPN/DNMT3B

PTPN1/TMEM98/CFTR/PLK3/BICD1/SH3GLB1/HNRNPU/NVL/MAP1A/MAVS/BNIP3L/RAB3A/CCNE2/MIRNA1/STK40/PTK2/THBS1/HIGD2A/CSNK2A1/DAD1/VPS35/CASP8/PTPN1/DUS2/NOTCH1/RPS27A/2A2/RAB11A/GOLPH3L/PACIN1/TIMM10/MITD1/NDUFA13/RHOA/NEK6/VPS11/AP3B1/YWHAG/CLT

F1/RNF2/PIAS4/RAD18/MED27/MASTL/UIMC1/USP27X/COPS5/HSPA5/FBXO45/TRIM21/IVNS1ABP,  
2D2A/NSUN4/RHOA/NEK6/VPS11/YWHAG/ATG13/IFT20/B9D1/MTERF3/MRPL11/FNBP1L/ATG9A/TN  
J1C/RAB8B/GLRB/RPL4/RPL41/RPL9/RPS6/RPL24/EFCAB7/RPL11/RPL10/RPS24/TIMM9/RPS3A/  
IP53BP1/MAP4K2/DAB2IP/HMGA2/RPTOR/ATAD5/THOC1

M1/CCDC88A/SEMA3F/NEURL1/MEGF8/TCHP/KNDC1/DMTN/DYNC2LI1/CEP97/TRIM46/XK/SEMA6B/  
SH2/PSMA7/UBE2E1/CCND2/POLE4/TFAP4/POLA1/PSMB3/MCM8/PTPA/ZNF207/CHMP1A/TOPBP1/C  
1/PDCD10/TRIP6/TRADD/LAMA4/PLXNC1/PTGER4/ACVR1B/VASH1/SLC8B1/CTNNA1/SRGAP2/LMO4,

ISL/CD4/CTSB/RELA/PSMB7/KLHL6/PRAM1/SKP1/EIF2B2/NOD1/CD19/TRIM15/PRKCB/BPIFB1/P  
IWS1/DDX1/LSM3/TARDBP/GRSF1/C1QBP/NOVA1/SRSF10/RNF40/SRSF7/PRPF40B/TRA2A/PRMT7/

333A/SRGAP1/TRIO/DOCK11/RAB2A/MAP4K4/RHOD/PIK3R2/RAB7A/EPH2/DOCK7/VAV3,  
F4E2/PSMA3/AAAS/DCP2/PYM1/HNRNPC/EIF2B1/AGO1/POLR2B/EIF5B/FXR1/EIF2AK1/SYNCRIP/

OT10/POLE3/RPA1/FBXL7/ANAPC5/CDC27/CDC34/CNOT3/TFDP1/UBE2E2/CACUL1/POLE2/HMGA2/

HOA/NEK6/CLTC/RNF8/CABLES2/BTC/USP39/BECN1/FBXL7/ANAPC5/PMF1/EREG/IST1/SEH1L/AR  
RIM32/CASP3/RPL11/SH3RF1/RTKN2/PLA2G6/MADD/NOX1/PARK7/ING2/SHISA5/NMT1/FIGNL1/E

















5R1/PPM1F/PRKAR1B/TPD52L1/DAXX/RHOA/STK3/GSKIP/RAPGEF1/YWHAG/ATG13/CNPPD1/ATP2B

/ECM1/BTK/PELI1/STX4/TREM1/CLEC7A/TNIP1/EIF2B5/POLR3D/LBP/ARPC1A/POLR3C/EXOSC3/  
EURL1/PARK7/PDE6G/MYC/SLC27A1/CD4/JTB/IFNG/MAPK15/ZNF622/HNRNPA2B1/MAP3K9/NOD1/



1/USP33/USP24/FBXL18/TSG101/FBXL2/CDC16/KAT5/UBE2R2/RAD23A/SVIP/PPP1R11/DVL1/DE  
36/PKD1/CSNK2A2/STUB1/ANAPC4/VPS4A/ATRAID/BAG6/HUWE1/BBS7/SNX5/FAF2/TMEM67/DDB1,  
/MFSD14A/ATG9B/NDUFA11/SREBF2/NDUFS3/RAB38/SLIRP

35/PARS2/PSEN2/HARS2/MRPL4/RBM24/DPH3/EIF6/EIF4G2/EIF4G3/GCLM/CNOT3/GLRX2/ATG7/1  
/STUB1/ANAPC4/RAB1A/HUWE1/PAF1/HDAC8/DDB1/FBXO44/SKP2/PSMB1/WWTR1/PIN1/WDSUB1/FI  
T5/UBE2R2/RAD23A/SVIP/PPP1R11/DVL1/DERL3/CLEC16A/UBE2J1/ARRB1/PSMD12/BFAR/ARMC8,  
UB3/RNF144A/SDF2/USP36/NUB1/UBQLN2/RNF121/CTSL/WWP2/CTSB/ARIH2/RNF126/TLK2/ANAP  
GAR/ADCY6/SDF2L1/HEXA/BPGM/ADCY5/AP2A1/CCL19/SEH1L/EIF6/DOLK/PDK3/PGM2L1/EGF/AT  
XCL17/ABL1/LMCD1/FCGR2B/IL10RA/RPS7/CALM2/PDCD10/TRIP6/CSK/TRADD/MAPKAPK3/WWC1/1

/DVL1/DERL3/CLEC16A/UBE2J1/ARRB1/PSMD12/BFAR/ARMC8/SMURF2/RNF40/OGT/MAPK9/CDC26,

USP13/MBD2/FIGNL1/NPHP1/SPIN4/NR6A1

HP1/SPIN4/NR6A1







SP90AA1/PRKAA2/ACVR1B/CDK2AP1/TWSG1/TNFSF15/LM04/PTK2/THBS1/ADAM17/TNK2/PTPN1/N



STUB1/BMP2/SNX5/C2CD5/RYK/PIK3CB/MY01C/BDKRB2/FSTL4/NCKAP1/PLCG1

S4/CRTAP/PPP2R5D/PIK3R2/CHMP6/C3orf33/WNK1/PPP2CA/HDAC3/RASSF2/NCOA7/IKBKB/TSG1

FA/PLA2G1B/PAK2/TRAF4/CSNK2B/UBA52/DUSP7/MAP3K10/PIH1D1/DGKQ/CDK5R1/PRKAR1B/TPD.

/ACTR2/UNC13A/TTL/STRADA/NEFH/BCL11A/FEZ1/DPYSL2/NEFL/ARPIN/DAG1/DVL1/ANOS1/LRP

/ARPIN/DAG1/DVL1/ANOS1/LRP4/SYT17/WNT5A/LRP2/PPP3CB/ARHGAP44/OLFM1

1B/PAK2/TLR2/MUC6/UBA52/HLA-F/RAB29/MUC15/CACNB3/PLD2/PSMC3/UBE2D2/STOML2/WIPF2,

0AA1/DNM2/TUSC2/PTK2/THBS1/KCNK5/TNK2/PTPN1/INPPL1/AAK1/SFRP4/BICD1/CD177/DMBT1,

2B1/FNBP1L/DOCK2/NR1H2/ELMO2/ADM/BECN1/AP2A1/LRPAP1/CCL19/CD247/HSP90B1/ARF1/STI

ARAP1/TRADD/MAPKAPK3/GDF11/CCND3/PTBP1/PTPN12/LEMD2/HSP90AA1/ACVR1B/TWSG1/DNM2/1  
/LRP4/SYT17/WNT5A/LRP2/PPP3CB/ARHGAP44/OLFM1





/TARBP2/CD79B/RHOA/HMG2/AP1S1/IFI6/IL17RA/NFKB1B/SIGIRR/TNFRSF14/DHX9/NR1H2/IF

/TARBP2/CD79B/RHOA/HMG2/AP1S1/IFI6/IL17RA/NFKB1B/SIGIRR/TNFRSF14/DHX9/NR1H2/IF  
SRP14/RPS18/RPS28/PIK3R2/RAB7A/TYSND1/RPS17/APPL2/NOLC1/UBL5/NUP214/HDAC3/BAP1/

/IVNS1ABP/ANXA3/BCL2L1/IFNAR2/RAB29/TARBP2/CD79B/RHOA/HMGN2/AP1S1/IFI6/IL17RA/N  
H3/EIF6/EIF4G2/EIF4G3/GCLM/CNOT3/PDK3/RPS9/KHSRP/DALRD3/GSS/EIF3G/DNAJC1/RPS14/I



A/CIB1/IL17RB/PANX2/CSNK2A2/ENY2/PARL/CLEC4E/CRLF2/HUWE1/TM9SF4/C2CD5/CNR1/MY010

3K10/ATP6AP2/RHBDD3/PSMC3/TPD52L1/DAXX/STK3/INHA/EMC10/RAPGEF1/PIK3R5/MAP3K1/GP  
2B4/MAP3K7/NFKBID/PSMB6/FFAR2/CD22/CNPY3/MFHAS1/PLA2G6/ICAM2/PSMA3/IRF4/PDE4B/E



P7/MAP3K10/ATP6AP2/RHBDD3/PSMC3/TPD52L1/DAXX/STK3/INHA/EMC10/RAPGEF1/PIK3R5/MAP:













A/PSMD9/PTK2/CSNK2A1/VPS35/PTPN1/RPL5/RPS27A/PLK3/SH3GLB1/MAGEF1/RGP1/HNRNPU/MAI

M2/NANOS1/CDC37/CDK5R1/PSMC3/TWIST1/EXOSC1/NRDC/CHFR/SLC25A12/GLMN/VPS11/HNRNPR,









/CLTC/TAPBP/AP1S1/AP1S3/AP1S2/GOSR2/ACER3/COG4/COPB1/PSEN2/SNAPIN/COG2/TMEM167A/3/SMAD2/WBP2/REPIN1/ORC4/HELB/XRCC5/SMC1A/SMAD3/SETD1A/BAZ1A/TP53/INO80E/TARDBP/A/HEXB/MYO6/TMBIM1/SLC17A5/SLC15A4/BCAN/UBA52/HLA-F/AP2A2/ACAN/BORCS6/TECPR1/AR

PRIM2/NUP107/NCOR2/CBX8/HELLS/PCGF2/XRCC6/HMG1/POLQ/TELO2/RAD21/MTBP/NIFK/RFWD/1/TOP/ARID5A/PAFAH1B2/REXO2/LARP4B/TRAFF7/NAT10/UTP6/ABL1/STK24/HEATR1/TIMM13/NOP1/A/HEXB/MYO6/TMBIM1/SLC17A5/SLC15A4/BCAN/UBA52/HLA-F/AP2A2/ACAN/BORCS6/TECPR1/AR

ABCB9/STX7/VAMP8/MILR1/RAB5C/GNLY/WIPI1/PSAP/BCL10/HSP90AA1/VPS35/CAPN2/SRGN/CF/4/CUL7/PPP2R3C/RNF19A/SPICE1/USP33/IFT140/BICD2/CEP95/CNTR0B/FEZ1/CEP135/CDC16/1/PROCR/EVC/NEK6/IFT20/B9D1/PIK3R5/DHX9/TMUB1/NIN/IFT22/CCHCR1/PSEN2/FBXL7/IST1/4

/CLEC16A/VTAA1/TICAM1/ACAP1/FGD2/WNT3A/SPPL2B/LZTR1/SNX6/TAB1/CD274/SNX21/SNX2/E/1/TMBIM1/SLC17A5/SLC15A4/ANXA3/BCL2L1/UBA52/HLA-F/AP2A2/RAB11A/ATP6AP2/SLC2A3/TSP

/GEMIN2/PABPN1/SRSF1/SRSF2/CASC3/SNRNP70/COIL/STK35/RBM4B/DHX8/ADD1/RBM8A/METTL

2/RAB3D/ARPC5/VCP/VCL/APRT/PDAP1/GHRHR/THBS2/HVCN1/STX7/VAMP8/BIN2/RAB5C/MOXD1/1/F/AP2A2/RAB11A/ATP6AP2/SLC2A3/TSPAN14/PACSN1/MLEC/PLA1A/ADGRG3/EXOC3/SIGLEC9/C/0/D3/PRPF19/ESCO2/RAD51C/SEC13/PTGES3/NAT10/RARG/DNA2/HSPA2/ARPC5/DOT1L/RAD51D/VCL/DBNL/COPG2/B4GALNT2/DNM2/NECAB3/SYS1/COG1/NOTCH1/VPS45/UGCG/FUT8/SCAMP2/ARFRP1/1/DPP7/DAGLB/RPTOR/ATP6V1B2/AP5B1/LITAF/VPS4A/ATRAID/PLD1/KIAA1324/SLC04C1/FAF2/V/1/PPL2/CYB561A3/SLA2/SORCS2/CPTP/TSG101/GRIPAP1/APH1A/GGA2/STOML1/FCGR1B/CHMP4A/E/1/MEN1/NFRKB/SP1/TNKS1BP1/ACTR6/PURB/NFATC1

AR1/HTT/MAGEE1/CAV2/EPN3/CAV1/EIF3G/ATP7A/SRCAP/TRIM68/SYNJ2/PREX1/ARFGEF1/CIB1

EBF1/GGA3/HLA-F/RTN1/B4GALT4/VAC14/RAB11A/RAB29/YIPF2/GOLPH3L/NOTCH3/GORASP2/SL

CDK2AP2/CCSAP/DCTN1/HAUS7/KATNA1/BICD1/PDLIM4/MYL9/HNRNPU/MAP1A/NEBL/ACTN1/JPH1/CDK2AP2/CCSAP/DCTN1/HAUS7/KATNA1/BICD1/PDLIM4/MYL9/HNRNPU/MAP1A/NEBL/ACTN1/JPH1/1/GPR84/CNN2/CALR/ALDOC/TGFB3/SYT1/APP/LAIR1/PNP/GAL/CYSTM1/PPFIA3/XRCC6/DNM1L/P/1/DCTN1/HAUS7/KATNA1/BICD1/PDLIM4/MYL9/HNRNPU/MAP1A/NEBL/ACTN1/JPH1/HAUS5/MYO6/CD

POP5/HNRNPU/NVL/LTV1/RPS12/SARNP/RPS4X/RPL6/HTATSF1/LSM8/MAGOH/RPL37/RPL27A/TRI



RAB3D/ARPC5/HLA-DOA/STMN2/STX7/SNX20/RUFY1/VAMP8/RAB5C/WIP1/DBNL/PSAP/VCAM1/DNAH7/768/TADA3/PAF1/TRRAP/METTL3/TEX10/SNRPD3/DDB1/FBXO44/SKP2/PIK3CB/SUPT7L/RPRD1A/1



KCTD12/CTBP1/MPP2/ZC4H2/ARF1/DOCK10/HTT/MAGEE1/PI4K2A/DAGLB/SYNJ2/RPS14/CALM3/E

/GLRB/PPP1R9A/EFHC1/LPAR1/RPS6/UCN/KCNC4/CASP3/TTL7/CD22



/WNT3A/MED6/ZNF653/TGIF1/HDGF/BRDT/ECD/SS18L2/HOXC6/MED31/HR/LPXN/HSPA1A/ABT1/JI  
RPL29/MRPL33/MRPS5/HSPB6/ADD1/RPL13/MRPL36/RPL4/RPL41/RPL9/MRPL14/RPS6/CSRP2/RP  
PIFO/CLIP3/DRG1/MAPT/ARPC1A/CKAP5/NF2/OBSCN/RAB3D/HSPA2/ARPC5/TNNI3/ABL1/EMD/TB  
FASTKD5/PIP4K2B/CKB/IGF2R/CCNG2/ULK1/UCLL1/DYRK3/DGKD/PIK3C2B/BRD4/EIF2AK1/TLK2  
1/DCTN1/NBN/CFTR/ARFRP1/KATNA1/NVL/RAD18/GNAI3/RAB3A/DXO/MYO6/HSPA5/DDX56/DYNC1  
1/DCTN1/NBN/CFTR/ARFRP1/KATNA1/NVL/RAD18/GNAI3/RAB3A/DXO/MYO6/HSPA5/DDX56/DYNC1  
1/DCTN1/NBN/CFTR/ARFRP1/KATNA1/NVL/RAD18/GNAI3/RAB3A/DXO/MYO6/HSPA5/DDX56/DYNC1  
D18/GNAI3/RAB3A/MYO6/HSPA5/DDX56/DYNC1I2/HSPA14/RAB11A/TUBB3/RAB29/KIF20B/RNF21  
SKIP/YWHAG/ATG13/CLTC/CNPPD1/STXBP1/ATP2B4/PRKAG1/MAP3K1/MAPKAPK5/TPRKB/ELMO2/N  
4K2/DAB2IP/RPTOR/HDAC5/CALM3/PGAM1/CIB1/PKD1/DUSP22/BORA/PTPRC/CDK5RAP1/SRSF2/A  
/YWHAG/CLTC/STXBP1/ATP2B4/RAB27B/SOCS7/KHDRBS3/ELMO2/KCNH2/SLC22A5/FAF1/DPYSL3/I  
FG/STX4/RALGDS/RPL23/WDR91/RACK1/IGBP1/ARHGDI/RIC8A/RGS3/TBC1D10C/RASAL3/PPP4C,  
K6/PLEKHG5/USP33/EIF2B3/BICD2/RASGRP1/GGA2/TAGAP/MAPKAP1/RAB11FIP1/SMCR8/RILPL2,

NME4/PHKG2/ADCK5/POLE3/EPHA2/SBK1/KSR1/NOL9/CDK11A/DOLK/PIK3R6/POLR2E/PDK3/IRAK;







LRIF1/KDM3A/HIF1AN/PRKCB/MED16/SMAD2/E2F7/WBP2/NOLC1/BRF2/RNF19A/GTF3C3/HDAC3/M







RG/FOSL2/JUNB/TRPS1/MNT/USP3/HIC2/CHD7/NFYA/SMAD5/SSBP2/ATF6B/DLX4/HNRNPD/PRMT5,

KLHDC8B/PSMD10/PSMD11/NES/RAE1/CDKN2C/PSMD1/DONSON/TIPIN/KIF2A/ODF2/CDK7/MSH2/P  
M4/LLPH/VEGFA/RAB3A/BCL9L/HEXB/ACTN1/LZTS1/PACSN2/FBXO45/RILPL1/ZMYM4/RAB11A/T  
/OSM/IL17D/CD84/INPP5D/TMEM106A/IL17RB/PANX2/PTPRC/LITAF/CLEC4E/RAB1A/CRLF2/ZCC  
M32/FFAR2/AGPAT1/TRIM27/NOX1/SYT11/ATP2B1/PARK7/IRF4/PDE4B/POLR3F/CD4/HYAL2/IFN

RAB3A/HEXB/TLR2/CSNK2B/TMBIM1/SLC15A4/ANXA3/HLA-F/AP2A2/ATP6AP2/SLC2A3/TSPAN14/  
P6AP2/SLC2A3/TSPAN14/MLEC/PSMC3/PPIE/AGA/ADGRG3/SIGLEC9/RHOA

A/HEXB/TLR2/CSNK2B/TMBIM1/SLC15A4/ANXA3/HLA-F/AP2A2/ATP6AP2/SLC2A3/TSPAN14/MLEC  
C/DBNL/PSAP/CD33/BCL10/HSP90AA1/C12orf4/TUSC2/ADAM17/NBN/CD177/MAN2B1/MAVS/OLFM

0A/STK3/INHA/AP3B1/RNF8/SIX1/ZNF160/PDPN/DOCK2/IDO1/RUNX3/ZMIZ1/LYL1/PSMC5/RBPJ

20/XCL2/CMKLR1/APP/PNP/SWAP70/TLR5/PSMD4/HK1/XRCC6/GPATCH3/PSMD3/PSMD7/LILRB4/A  
3/APPL2/RPS6KA3/SLA2/TLR1/S100A1/WNK1/NOD2/BTN3A2/EIF2B3/ACTR2/IKKBK

51C/BTG2/PTGES3/NAT10/DNA2/ABL1/RAD51D/VCP/WRAP53/NOP10/UBQLN4/DCLRE1B/FAAP20/T  
FRKB

3/PHF13/BRD4/ASF1A/RELA/NSD1/TLK2/DYDC2/SPIN1/SKP1/AKAP8/KMT2B/NAA50/SUPT6H/KDM  
0/POLR2J/EXOSC1/NOB1/RPUSD3/HNRNPL/SF3B3/NSUN4/SUGP2/HNRNPR/INTS4/DDX10/POLR2D/  
RPL10/KLHL25/HNRNPD/RPS24/MRPL3/LSM14B/NEURL1/EIF4E2/ERAL1/PYM1/EIF3F/RPS3A/EIF  
05A/RALB/CSPG5/WDR1/CLEC5A/CCT8/TBC1D10C/ENDOD1/FCGR3B/NSF/HPSE/RAB4B/CCL3/S100

/BCL2L1/UBA52/MORF4L2/KIF22/INTS7/NUAK1/FANCF/UBR5/PPIE/POLR2I/TWIST1/POLR2J/RB  
K5R1/ARL8B/PARD3/SASS6/RBM14/CC2D2A/RHOA/NEK6/AP3B1/IFT20/CLTC

C5/EREG/CDC27/CNOT3/MUS81/TFDP1/UBE2E2/MAEA/CAV2/EGF/HMGA2/RPTOR/ATAD5/ERCC3/PK  
BRG4/BCL2L1/GLI1

1/CWC15/WDR83/PAPOLA/SMN1/HSPA1A/HNRNPH2/CRNKL1/SF1/HNRNPH3/CIR1/ZMAT2/USP4/CWF

AUS7/NBN/FBXW5/PLK3/SH3GLB1/HNRNPU/RNF2/ZFYVE19/MARK4/HAUS5/UIMC1/BCL2L1/GLI1/D  
IH2/MAPK15/TERF1/CNOT2/HNRNPA2B1/AKAP8

LGALS14/ZNF346/IP6K2/BIK/CNR1/GNA13/PPARG/PIK3CB/TFPT/TNFRSF1B/PIN1/ARHGEF18/PL  
7A/FKBP8/BICD1/RPS12/MAVS/CTBP2/DMBT1/RPS4X/RPL6/HTATSF1/BNIP3L/RPL37/PAK2/RPL2  
HNRNPL/SF3B3/SUGP2/RPL13A/HNRNPR/POLR2D/SART3/DHX15/TGS1/ANP32A/RPL37A/GPKOW/KH

INPPL1/STAT5A/PIAS4/MAVS/IRF5/VEGFA/IL20RB/PAK2/OAS3/TNFRSF25/CSNK2B/TRIM21/BCL  
L2

/RPL26L1/TSC1/NOL11/GEMIN5/ERI1/EIF3C/DDX1/NSUN5P2/LSM3/ZNHIT6/ATXN2/TSR1/RPP38  
/KCNH2/SPTAN1/PARVB/DPYSL3/CORO2B/NOTCH2/HSP90B1/ARF1/RHOBTB2/GMFB/NPHP4/HAX1/C

/ANTXR1/SPIRE2/ARHGEF18/NCKAP1/PPP1R9A/LPAR1/PXN/TRIM32/CSRP2/CCDC88A/BCR/ATP2C  
10/MAEA/OSM/IL17D/HAX1/LDB1/ATP7A/PKNOX1/PREX1/DCLRE1C/RPS14/INPP5D/HDAC5/CIB1/

GAP3/SF3B3/GLMN/VPS11/ABHD17A/CLTC/RNF8/ANKZF1/AP2B1/FAP/LGMN/TPP1/MANBA/TMUB1/

PACSN1/PPP2R5B/CDK5R1/METR1/PARD3/APBB1/SRF/CAPRIN1/RHOA/CD38/RAPGEF1/IFT20/ST

N/DYNC2LI1/CEP97/TRIM46/XK/SEMA6B/FAM98A/MAPK15/DOCK11/SEMA4C/ATG3/MAP4K4/PTPRS  
UBE4B/UBE2E2/SH3RF3/PEX10/RAB40C/MAEA/ATG7/RNF114/KLHL12/PEF1/CAV1/UBAC1/NEDD8/  
/BAD/CENPQ/CD33/ERP29/PTGER4/HSP90AA1/PRKAA2/SLC8B1/PSMD9/VPS35/CASP8/PTPN1/SRG  
SREBF1/PACSIN2/GGA3/HSPA5/RPL36/UBA52/CD2AP/PIH1D1/RAB11A/HIKESHI/ZPR1/NEDD1/RA  
UFS5/LONP1/TAZ/CKAP5/MCTS1/NDUFB9/PRPF19/TAF12/MZT1/BRK1/HSPD1/SEC13/MRPS7/PTGE  
27/DNASE1L1/EXOSC2/ZC3HAV1/RPL29/LARP1/YTHDF2/CASC3/RPL13/RBM8A/METTL3/MAGOHB/H  
PS28/RPS17/PTCD1/PNPT1/NOLC1/GTF3C3/SMAD3/NOL11/ERI1/MAEL/TP53/DDX1/NSUN5P2/MET

PDCD10/TRIP6/TRADD/LAMA4/PLXNC1/PTGER4/ACVR1B/VASH1/SLC8B1/CTNNA1/SRGAP2/LMO4/P

K/LRPPRC/POLDIP3/RPL11/ENC1/RPL10/KLHL25/HNRNPD/RPS24/MRPL3/LSM14B/NEURL1/EIF4E  
TK4/RPS6/NFKBID/CASP3/CALHM2/RPL11/NCSTN/PLA2G6/NOX1/NEURL1/DDX20/PARK7/PNMA5

PAR1/STK4/RPS6/NFKBID/CASP3/CALHM2/RPL11/NCSTN/PLA2G6/NOX1/NEURL1/DDX20/PARK7/P  
ST1/TEX11/RHOA/CD38/STXBP1/SIX1/IFI6/PDPN/LGMN/IDO1/NAA15/PSMC5/TIGAR/CCAR2/BTC

/VDAC2/ERCC1/VEGFA/RAB3A/MARK4/TLR2/ADD3/DEF8/PIH1D1/EML2/TRIM37/MECP2/CENPJ/PP

PSMA4/RPS15/SGTA/TUSC2/RPS16/VPS35/CASP8/USF1/RPL5/NOTCH1/RPS27A/FKBP8/BICD1/RP  
/RPS23/RPS10/VAMP8/RNF216/PTBP1/PSMB5/BAD/GNLY/ACOT8/PSMA4/RPS15/SGTA/TUSC2/RPS

5/CNOT10/STXBP4/POLE3/RPA1/FBXL7/ANAPC5/CDC27/CDC34/CNOT3/TFDP1/UBE2E2/CACUL1/P  
/FCGR2B/APRT/PDAP1/HVCN1/VAMP8/MILR1/BIN2/RAB5C/DBNL/PSAP/CD33/HSP90AA1/C12orf4  
M1/PSMD9/PTPN2/CASP8/PTPN1/RPS27A/CD177/MAVS/IRF5/KYNU/DMBT1/OPTN/PLA2G1B/PAK2/

6/TMEM64/RAB11A/MESP1/MORF4L2/KIF20B/TARBP2/PACSIN1/ALOX15B/VEZF1/PPP2R5B/NKAP/

19/PIK3R6/IRAK2/GMFB/DUSP18/CACUL1/HTT/EGF/MAP4K1/CAV1/MAP4K2/DAB2IP/HMGA2/RPTO  
6/NFKBID/CASP3/CHD7/CLPTM1/CD22/ICOS/NCSTN/SH3RF1/PRF1/IRF4/RHOH/UNG/CD4/IFNG/A

EPHA2/KITLG/ARTN/MECOM/CCL19/VPS33A/EIF6/NOTCH2/PIK3R6/DOCK10/MAEA/OSM/IL17D/BA

IB1/DUSP22/SACS/CST3/EVI5L/PROM2/CXCL10/TMEM67/ADD1/FEZ2/RYK/ANTXR1/TNFRSF1B/TF  
/TRIP6/ARAP1/TRADD/LAMA4/PLXNC1/PTGER4/ACVR1B/VASH1/SLC8B1/CTNNA1/SRGAP2/LMO4/T

NJL/RPL5/DUS2/RPS27A/NBN/HNRNPU/NVL/VEGFA/PFKFB2/CCNE2/PLA2G1B/PAK2/MASTL/TRAF4  
8/EDNRA/CAV2/CAV1/DNAJC1/DAB2IP/ARL1/PREX1/ARHGAP22/CALM3/ARHGAP27/ARFGEF1/RIC8

BPC1L/ACTR1A/OFD1/LLGL2/VPS4A/NECTIN2/RAB1A/BBS7/TMEM67/CNR1/CEP72/MYO1C/ATP2A2

ARK4/PLA2G1B/JPH1/SREBF1/TMBIM1/BCL2L1/CD2AP/EDEM2/RAB11A/ZPR1/PNKD/RAB29/KIF20  
/FKBP8/PLK3/RAD18/VDAC2/VEGFA/GNAI3/BNIP3L/GABRB3/PAK2/TMEM109/DDAH2/COPS5/HSPA  
C/STXBP1/TAPBP/XKR8/GAK/TAP2/GOSR2/AP2B1/FNBP1L/DOCK2/HBEGF/BTC/BECN1/SNAPIN/AP

/LRR1/UBA52/TRPC4AP/UBE2Q1/TRIM37/RNF213/RNF25/UBR5/PSMC3/KLHL21/USP11/UBE2D2/C  
P01/IFT22/BECN1/TTL3/IST1/SSX2IP/EIF6/NPHP4/ATG7/HTT/RPS14/CBY1/DZIP1/CCDC65/R  
TIMM22/ZDHHC20/NMT1/VAMP3/KIF5B/RAB3C/RPL14/DMTN/RAB3IP/ARL3/SRP19/RPL10A/IFNG/

FAM98A/MAPK15/DOCK11/SEMA4C/ATG3/MAP4K4/PTPRS/EPS8L2/CARMIL2/CUL7/TRAK2/PLXNB3/  
TDNEP1/RANBP1/PRIM2/APP/PSMD4/CETN2/PSMD3/RBX1/ACTL8/PSMD7/RAD21/KATNB1/MTBP/WR  
/PTK2/THBS1/ADAM17/CCSAP

TPRS/PIK3R2/CLEC4A/VAV3/APPL2/RPS6KA3/SLA2/TLR1/S100A1/WNK1/NOD2/BTN3A2/EIF2B3/  
CACTIN/RSRC1/METTL16/BCAS2/SNRNP35/PHRF1/DDX46/ZCRB1/BRDT/PCBP2/PSIP1/SMU1/AAR2

/DOCK6/PLEKHG5/SHTN1/RAC3/RRAS2/ARHGAP15/RAB6A/TP53/RASGRP1/RAB28/TAGAP/MAPKAP1  
EIF4G1/PSMB7/CNOT2/HNRNPA2B1/EIF2B2/SESN2/SMAD2/ELAVL1/FASTKD1/ZMPSTE24/RPS6KA3

RPTOR/ATAD5/CALM3/ENSA/ERCC3/PKD1/BORA/ACTR1A/OFD1/ANAPC4/VPS4A

F1/MAEA/SMC2/OSM/SPOUT1/HMGA2/CALM3/ENSA/CIB1/BORA/CUZD1/LLGL2/ANAPC4/VPS4A

YA3/PAM16/HYAL2/HTRA2/IFNG

















4/PRKAG1/PIK3R5/MAP3K1/GPS1/SOCS7/MINK1/RPLP1/MAPKAPK5/HEG1/GTF2H1/TIGAR/FAF1/S

BTN2A2/CD300LB/BRK1/HSPD1/PSMD8/ARPC5/ABL1/FCGR2B/PSMA1/TNFAIP3/CD300C/STX7/KCN  
CD19/MAP4K4/MAP3K11/VAV3/PPP2R3C/ACE/MUL1/WNK1/NOD2/PPP2CA/XRCC5/CARD14/RASSF2/



RL3/CLEC16A/UBE2J1/ARRB1/PSMD12/BFAR/ARMC8/SMURF2/RNF40/OGT/MAPK9/CDC26/SOCS5/U  
/FBX044/SKP2/PSMB1/WWTR1/SUMO2/USP3/FBX010/TRIM32/PSMB6/RPL11/ENC1/CDC23/KLHL25

RPS9/KHSRP/DALRD3/GSS/EIF3G/DNAJC1/RPS14/MKNK1/RPS27/MRPS24/RPL29/STUB1/EIF2D/M  
BXO10/KCMF1/TRIM32/PSMB6/BTBD1/RPL11/ENC1/NXN/CDC23/KLHL25/TRIM27/SH3RF1/NEURL1  
/SMURF2/RNF40/OGT/MAPK9/CDC26/SOCS5/USP46/TRIP12/KLHL22/ANAPC1/PCBP2/DNAJC18/UB  
C15/PSMB7/NKD2/RNF115/SKP1/ANKIB1/ADAMTS12/RNF186/DERL1/KCTD13/ZMPSTE24/UBR4/CU

P7A/AK1/EOGT/B3GALT6/HS6ST2/PGAM1/ARFGEF1/TMEM106A/HS2ST1/ST8SIA4/ACACA/ADCY3  
PTBP1/BAD/DBNL/PSAP/BCL10/ERP29/SPPL3/HSP90AA1/TNFSF15/PTK2/PTPN2/THBS1/STYXL1/

/SOCS5/USP46/TRIP12/KLHL22/ANAPC1/PCBP2/DNAJC18/UBXN2A/ZFAND2B/USP13/UBE2K/PSME







OTCH1/RPS27A/NBN/MAVS/MOB2/VEGFA/PFKFB2/PLA2G1B/PAK2/TRAF4/CSNK2B/UBA52/DUSP7/M



01/TARDBP/PRKAR2A/SNTA1/SMCR8/DUSP26/DAG1/PPP1R11/DVL1/MARVELD3

52L1/DAXX/RHOA/STK3/INHA/EMC10/RAPGEF1/ATG13/ENPP2/ATP2B4/PRKAG1/PIK3R5/MAP3K1/

4/SYT17/WNT5A/LRP2/PPP3CB/ARHGAP44/OLFM1

/RBM14/CD79B/CD38/RAPGEF1/STXBP1/MAP3K1/LGMN/TNFRSF14/DHX9/ID01/ELMO2/PSMC5/ADO

/VEGFA/SMAP1/TLR2/MY06/PACSIN2/ANXA3/BCL2L1/CANX/CD2AP/AP2A2/PACSIN1/DGKQ/PLD2/



EAP2/RHOBTB2/ITGAL/SNX3/CD5/CAV2/EGF/LMAN2/CAV1/CALM3/ARHGAP27/CD3G/PTPRC/RAB1A

PTK2/PTPN2/THBS1/ADAM17/PTPN1/NOTCH1/RPS27A/FUT8/FKBP8/SFRP4/STAT5A/NPPB/VEGFA/



ITM3/IDO1/RPL30/RBPJ/ADM/BECN1/EPHA2/CYP27B1/CCL19/FAM3A/KPNA6/SEH1L/XCL1/TLR7/

ITM3/IDO1/RPL30/RBPJ/ADM/BECN1/EPHA2/CYP27B1/CCL19/FAM3A/KPNA6/SEH1L/XCL1/TLR7/  
SMAD3/RPL22/GNPAT/TSG101/TP53/TARDBP/RPS15A

FKBIB/SIGIRR/TNFRSF14/DHX9/NR1H2/IFITM3/IDO1/RPL30/TIGAR/RBPJ/ADM/BECN1/EPHA2/C  
MKNK1/RPS27/MRPS24/RPL29/EIF2D/MRPL33/LARP1/ST8SIA4/ACACA/YTHDF2/CDK5RAP1/MRPS5



C/TNFRSF1B/TLR8/EFCAB7/FFAR2/CD22/TRIM27/PLA2G6/RBM22/SYT11/PARK7/C2CD2L/USP36/

S1/MINK1/MAPKAPK5/HBEGF/NRTN/SPTAN1/PSMC5/ADORA2B/BTC/UBE2N/EPHA2/KITLG/ARTN/KS  
IF2B1/CTSL/CD4/CTSB/RELA/AIM2/PSMB7/KLHL6/PRAM1/SKP1/EIF2B2/NOD1/CD19/TRIM15/PR





3K1/GPS1/MINK1/MAPKAPK5/HBEGF/NRTN/SPTAN1/PSMC5/ADORA2B/BTC/UBE2N/EPHA2/KITLG/A











P1A/THRA/OPTN/PFKFB2/GNAI3/EXOSC9/BNIP3L/DXO/LZTS1/EXOSC7/SREBF1/GGA3/TBRG4/TRI

/ATG13/IFT20/ATP2B4/PRKAG1/ANP32A/WDR41/DHX9/TNP01/PSMC5/TIGAR/FAF1/PHKG2/CCAR2









/NOTCH2/TLR7/TMEM167B/ARF1/STEAP2/BET1L/COPA/RAB9A/RAB40C/KLHL12/CAV2/PEF1/LMAN  
/KAT5/ETV3/SUZ12/APEX1/BAZ1B/HMGXB4/TAF4/SLX4/POLD2/ACTR8/NACC2/MEN1/NFRKB/SP1/  
L8B/AGA/VPS11/AP3B1/CLTC/AP1S1/AP1S3/AP1S2/AP2B1/LGMN/WDR41/IFITM3/TPP1/MANBA/G

3/CENPN/NABP1/RBBP7/RAD9A/RPA2/UTP4/DPF2/POLD3/INO80C/TIMELESS/POLR3D/NDE1/ZWIL  
0/KRI1/RPS7/AKNA/DNTTIP1/RPL7A/WDR55/GAR1/RPS10/DDX23/PTBP1/SEN3/PRKRIP1/MRPS1  
L8B/AGA/VPS11/AP3B1/CLTC/AP1S1/AP1S3/AP1S2/AP2B1/LGMN/WDR41/IFITM3/TPP1/MANBA/G

TR/SH3GLB1/MAN2B1/LTV1/MCOLN3/CYB5R3/OPTN/CCZ1B/GNAI3/GLIPR1/RAB3A/HEXB/MYO6/TM  
PRKAR2A/RILPL2/MACROD2/HYLS1/APEX1/PATJ/ATP6V1D/GNAI2/ACTR8/PARD6A/HAUS3/LRRCC1  
CDC27/SSX2IP/UXT/NPHP4/KLHL12/HTT/SPOUT1/CALM3/CBY1/DZIP1/RIC8B/CIB1/ACTR1A/OFD

HD3/SLC30A3/INPP5F/STX8/PLEKHF2  
AN14/PACSIN1/DGKQ/MLEC/PLA1A/ADGRG3/EXOC3/SIGLEC9/COPB2/RHOA/CD38/AP3B1/RAPGEF1

3/SNRPD3/EAF2/MYO1C/AK6/MRPL36/ZNF473/WWTR1/ACIN1/SUM02/RAB8B/PIN1/TFIP11/TRIP4

DBNL/PSAP/CD33/LOXL1/HSP90AA1/CTNNA1/THBS1/NOTCH1/SRGN/CD177/MAN2B1/DMBT1/OLFM4  
OPB2/RHOA/CD38/AP3B1/RAPGEF1/CLTC/TAPBP/AP1S1/AP1S3/TAP2/AP1S2/SNX17/STXBP5/GOS  
P/WRAP53/MTA3/UBQLN4/DCLRE1B/EME2/ACTR3/GAR1/CHEK2/RAD1/SFR1/CENPQ/LEMD2/BOD1/H  
PLK3/GALNT7/BICD1/SH3GLB1/RGP1/FIG4/OPTN/LARGE2/PHTF1/GNAI3/GNPTAB/SREBF1/GGA3/  
PS16  
CE1/MCOLN1/CLEC16A/VTA1/TICAM1/LRP2/ACAP1/FGD2/IL12A/WNT3A/SPPL2B/LZTR1/SNX6/TA

/FAM168B/VPS4A/ATRAID/PLD1/CASC3/NMRAL1/MTMR14/RHBDD2/PPARG/ATP2A2/ATP9A/TNFRSF

C35B1/SULF2/SLC35A4/TMEM115/CHST3/TMEM87A/GOLT1B/ZDHHC9/ERGIC3/TMEM130/COPB2/FU

/HAUS5/MYO6/CD2AP/DYNC1I2/RAB11A/TUBB3/EML2/KIF20B/CENPJ/KIF22/CDK5R1/KLHL21/TN  
/HAUS5/MYO6/CD2AP/DYNC1I2/RAB11A/TUBB3/EML2/KIF20B/CENPJ/KIF22/CDK5R1/KLHL21/TN  
SMD3/CTSD/SYT3/PSMD7/CPE/ECM1/GMFG/STX4/PRDX4/RABAC1/MYO5A/CLEC5A/CCT8/TBC1D10C  
2AP/DYNC1I2/RAB11A/TUBB3/EML2/KIF20B/CENPJ/KIF22/CDK5R1/KLHL21/TNNC1/WIPF2/CACN

M21/IVNS1ABP/RPL36/UBA52/CANX/HSPA14/PIH1D1/TARBP2/RBMX/ZRSR2/RPL19/HNRNPA1/PSM



M2/TNK2/VPS35/PTPN1/VPS45/RPS27A/SCAMP2/CFTR/PDLIM4/LTV1/FIG4/MCOLN3/OPTN/CCZ1B  
FBXO10/MAP3K7/RIOK1/ENC1/NAA25/CDC23/KLHL25/OST4/PRMT5/NCOA6/TCEA1/PHF1/GTF2A2/



PHB2/RPS27/SLC9A6/ARHGAP33/ADD1/CNR1/LIN7B/RAB8B/PIN1/GLRB/PPP1R9A/CASK/UTRN/LP





UP/MTF1/E4F1/SF1/DNAJB1/GPS2/CIR1/SUPT20H/GATA3

L24/RPL11/RPL10/RPS24/EPB41/MRPL3/SH3RF1/RPS3A/MRPL20/BGLAP/RPL14/SPARC/NPHP1/K

CD/RAD51D/VCL/STMN2/ZNF185/CALM2/ACTR3/BAG2/CDH24/DBNL/HOOK2/HSP90AA1/VASH1/CTN  
/MAPK15/FN3KRP/CCNJ/TRIO/CLK2/ADPGK/MAP3K9/PRKCB/MAP4K4/PRPS1/ERCC2/FASTKD1/MAP  
I2/HSPA14/RAB11A/TUBB3/NUDT18/RAB29/KIF20B/RNF213/KIF22/ARL8B/PSMC3/DHX57/AGAP3  
I2/HSPA14/RAB11A/TUBB3/NUDT18/RAB29/KIF20B/RNF213/KIF22/ARL8B/PSMC3/DHX57/AGAP3  
I2/HSPA14/RAB11A/TUBB3/NUDT18/RAB29/KIF20B/RNF213/KIF22/ARL8B/PSMC3/DHX57/AGAP3  
3/KIF22/ARL8B/PSMC3/DHX57/AGAP3/RHOA/ARF5/ACTR5/RFC5/DDX10/TAPBP/ATP2B4/DHX15/M  
IN/FAF1/ADCY6/BECN1/WDCP/AP2A1/KSR1/FIZ1/CD247/RHOBTB2/CACUL1/HTT/CAV2/CAV1/MAP  
RHGAP33/ATP1B1/VRK2/HNRNPA0/PIN1/PLCG1/PPP1R9A/TRIP4/UTRN/RPS6/MAP3K7/PXN/CCDC8  
LUC7L/PMF1/IST1/SSX2IP/CTBP1/ARF1/TFDP1/EPN3/LDB1/DAB2IP/HMGA2/ARL1/SYNJ2/GTF2F  
/CARD18/TBC1D22A/DBF4B/CCL3/CHN1/ANKLE2/PKIA/TBCD/VCP/NPRL3/RASAL1/SFRP2/RPS7/C

/DVL1/CLEC16A/DIAPH3/TNP02/RNF41/AP3M1/RGL1/ARHGAP44/PARD6A/FGD2/GAS8

2/CCL8/PGM2L1/POLE2/MAP4K1/PI4K2A/YRDC/ATR/CHKB/AK1/MAP4K2/MKNK1/EPHB2/ERCC3/CS







ED17/SMAD3/SETD1A/NCOA7/TP53/ELK1/TBPL1/TNFRSF10A/TAF11/ZNHIT6/GTF2E1/KAT5/MTDH







/HOXB6/CC2D1A/ETV1/ZNF143/IRF4/HNRNPC/EGR2/BCOR/TFEC/POLR3F/AGO1/TAL2/MYC/POU2F

SMA7/UBE2E1/CCND2/POLE4/TFAP4/POLA1/PSMB3/MCM8/PTPA/USP22/ZNF207/CHMP1A/TOPBP1/UBB3/SLC39A3/KIF20B/SSH3/IFRD1/PACSN1/CDK5R1/METRN/PARD3/FAM171A1/APBB1/SRF/CAHC3/NFKBIL1/TNFRSF1B/PIN1/ADCY7/TLR8/MAP3K7/UCN/TRIM32/FFAR2/AGPAT1/TRIM27/NOX1G/ANXA1/RELA/AIM2/CCR2/AKAP8/POLR1C/CHID1/POLR3A/HLA-E/NOD1/TRIM15/PTPRS/CLEC4A

MLEC/PSMC3/PPIE/AGA/ADGRG3/SIGLEC9/RHOA/STXBP1/RNF8/DOCK2/MANBA/COPB1/SPTAN1/AD

/PSMC3/PPIE/AGA/ADGRG3/SIGLEC9/RHOA/STXBP1/RNF8/DOCK2/MANBA/COPB1/SPTAN1/ADORA24/CYB5R3/ERCC1/GLIPR1/RAB3A/HEXB/PLA2G1B/IL20RB/TLR2/CSNK2B/TMBIM1/SLC15A4/ANXA

/BPGM/EPHA2/KITLG/ARTN/MECOM/CCL19/VPS33A/EIF6/NOTCH2/PIK3R6/DOCK10/MSH6/MAEA/O

P3D1/RPS19/IKBKG/AXL/FADD/BTK/PELI1/STX4/CLEC7A/HCAR2/TNIP1/RASAL3/GPR183/EIF2B

DG/COPS6/EME2/GAR1/CHEK2/CLSPN/RAD1/SFR1/HSP90AA1/CHD1L/CDK2AP1/TATDN2/HDAC10/S

3A/PRKCB/MBD1/KDM4A/WBP2/ZMPSTE24/NAP1L3/HDAC3/BAP1/SUPT16H/SETD1A/SUPT3H/SAFB/SART3/DHX15/TOE1/TGS1/WDR75/CTU1/GPKOW/KHDRBS3/TSEN34/DHX9/FAM207A/RBM28/BMS1/T2B1/AURKAIP1/MRPL20/AGO1/ABCF1/RPL14/TMA7/PPA1/MRPL24/MRPS16/EIF5B/RPL10A/FXR1/A7/KCNAB2/GCA/PAFAH1B2/RAB3D/ARPC5/VCP/VCL/FCGR2B/APRT/PDAP1/HVCN1/VAMP8/MILR1/

M14/APBB1/ACTR5/RFC5/RNF8/POLR2D/GPS1/HINFP/DHX9/GTF2H1/DMAP1/TIGAR/TIPRL/CNOT1

D1/BORA/ACTR1A/OFD1/ANAPC4/VPS4A

19L1/SF3A1/SRSF4/GPATCH1/PDCD7/CLP1/NUDT21/CLASRP/RBM4/RBMXL1/GEMIN4/NCBP1/TSEN

YNC1I2/RAB11A/GPR132/CRLF3/NEDD1/TRIM37/KIF20B/MECP2/CENPJ/PPP2R5B/CDK5R1/PSMC3

CG1/LPAR1/STK4/RPS6/NFKBID/CASP3/CALHM2/RPL11/NCSTN/PLA2G6/NOX1/NEURL1/DDX20/PA7A/OAS3/TRIM21/IVNS1ABP/BCL2L1/RPL36/UBA52/AP2A2/DYNC1I2/VAC14/RAB29/TARBP2/RPLDRBS3/RPLP1/TSEN34/DHX9/EDC4/RBM28/GTF2H1/RNMT/RPL32/TNPO1/RPL30/PSMC5/CNOT10/C

2L1/UBA52/CANX/HLA-F/IFNAR2/TNFRSF9/AIP/CDC37/DUOX1/PSMC3/CXCR6/IL21R/TWIST1/NM

/C1QBP/MRPS11/SRSF10/WDR74/WDR18/LSM14A/MRPL22/PRMT7/METTL16/MRM1/PSIP1/AAR2/XAAV1/RAB13/ARHGEF17/PREX1/ARFGEF1/ARHGAP17/FRMD6/LLGL2/VPS4A/ADD1/ASAP3/MYO1C/AN

1/EPB41/TRIM27/CAPZA2

ZNF683/CD3G/PTPRC/YTHDF2/CLEC4E/PAF1/IKZF3/ZNF16/ADD1/METTL3/PPARG/JUNB/LOXL3/P

PSMC5/FAF1/ARRDC1/CCAR2/CTSW/SDF2L1/FBXL7/UBE2N/ANAPC5/HECTD3/AP2A1/CDC27/CDC34

XBP1/GAK/ROB3/ACAP3/MINK1/GPC2/NIN/NRTN/SPTAN1/ADCY6/ADM/DPYSL3/SNAPIN/EPHA2/A

/EPS8L2/CARMIL2/CUL7/TRAK2/PLXNB3/MUL1/TSC1/SHTN1/ACTR2/UNC13A/TTL/IFT140/CNTR0  
PCGF3/TRIM68/PARP10/FBX06/FBX041/STUB1/ANAPC4/RAB1A/HUWE1/PAF1/HDAC8/DDB1/FBX04  
N/TMEM98/CFTR/AAK1/PLK3/BICD1/SH3GLB1/NVL/MAP1A/MAVS/PFKFB2/BNIP3L/CCNE2/MARK4/  
B29/KIF20B/TIMM10/AIP/RPL19/UBR5/VPS37B/KLHL21/UBE2D2/NDUFA13/RPS11/CC2D2A/RASS  
S3/TRAF7/TAF10/ARPC5/ABL1/MPV17L2/TBCD/SART1/STMN2/SRPK1/ACTR3/RPS23/RPS10/DDX2  
NRNPA0/PSMB1/TNFRSF1B/MOV10/RPL4/RPL41/SMG7/RPL9/RPS6/CNP/PPP1R8/RPL24/PSMB6/CA  
TL2B/TAF11/ZNHIT6/GTF2E1/AARS2/TSR1/METTTL6/GRSF1/RPP38/PARN/MRPS11/THUMPD3/QTRT  
  
TK2/PTPN2/THBS1/ADAM17/CCSAP/VPS35/NOTCH1

2/ERAL1/PYM1/EIF3F/RPS3A/EIF2B1/AURKAIP1/MRPL20/AGO1/ABCF1/RPL14/TMA7/PPA1/MRPL

NMA5

/BECN1/KITLG/MECOM/CCL19/NOTCH2/HSP90B1/GCLM/CRLF1/MAEA/SERPINB9/HTT/HAX1/CAV1/  
P2R5B/CDK5R1/ARHGAP28/PSMC3/PPM1F/TWIST1/RBM14/SRF/RHOA/RPL13A/VPS11/RAPGEF1/IF  
S12/MAVS/CTBP2/DMBT1/RPS4X/RPL6/HTATSF1/BNIP3L/RPL37/PAK2/RPL27A/OAS3/TRIM21/IV  
16/VPS35/CASP8/USF1/RPL5/NOTCH1/RPS27A/FKBP8/BICD1/RPS12/MAVS/CTBP2/DMBT1/RPS4X  
  
OLE2/HMGA2/RPTOR/ATAD5/CALM3/ENSA/PAGR1/ERCC3/PKD1/BORA/ACTR1A/PTPRC/OFD1/ANAPC  
/THBS1/NOTCH1/SRGN/CD177/MAN2B1/CTBP2/OLFM4/CYB5R3/VEGFA/GLIPR1/RAB3A/HEXB/ACTN  
OAS3/TLR2/TRIM21/MUC6/UBA52/HLA-F/IFNAR2/MUC15/CDC37/PSMC3/UBE2D2/RBM14/NMI/RPL  
  
METRN/TWIST1/APBB1/SRF/CAPRIN1/RHOA/STK3/AP3B1/RAPGEF1/PDPN/DNMT3B/GPC2/RUNX3/Z  
  
R/CALM3/EPHB2/CIB1/PKD1/DUSP22/BORA/PTPRC/BMP2/ADCY3/CDK5RAP1/CXCL10/ADNP/PIK3C  
NXA1/CCR2/HLA-E/FZD9/SUPT6H/DOCK11/CD19/POU2F2/GON4L/PRKCB/CLEC4A/VAV3/PPP2R3C/  
  
RX1/HAX1/LDB1/ATP7A/PKNOX1/PREX1/DCLRE1C/RPS14/INPP5D/HDAC5/CIB1/ZNF683/CD3G/PT

IP11/FSTL4/PPP1R9A/LPAR1/ABCA7/IK/UCN/PHF1/CAPZA2/SEMA3F/SYT11/PARK7/DCP2/BUB3/  
CTEX1D2/PTK2/THBS1/ADAM17/CCSAP

/CSNK2B/UBA52/DUSP7/MAP3K10/PIH1D1/TARBP2/DGKQ/CDC37/CDK5R1/PPM1F/PRKAR1B/TPD52  
B/ARHGAP17/PTPRC/LLGL2/BMP2/RALBP1/ARHGAP33/EVI5L/ASAP3/RALGAPB/ATP1B1/GNA13/PP

/RAB8B/SPIRE2/KIF3A/CD59/RAB1B/CASK/PLEKHM1/TBC1D20/LRP3/CDC23/SYT11/C2CD3/CN

B/CACNB3/DGKQ/CDK5R1/UBR5/PPM1F/PARD3/TNNC1/PRKAR1B/CACNA1D/RASSF5/VPS11/YWHAG/  
5/TMBIM1/TXNDC12/IVNS1ABP/BCL2L1/UBA52/HLA-F/PIH1D1/ZPR1/PRDX5/MEIS3/MECP2  
2A1/EREG/ARF1/TFDP1/MFN1/RHOB2/BET1L/NAPG/ATP11A/ATG7/SNX3/KLHL12/SAMD9L/CAV2

HFR/NMI/RASSF5/DAXX/TRIM69/RHOA/GLMN/ACTR5/RNF8/DCAF7/SART3/GPS1/PRMT3/SOCS7/CTPS27/ACTR1A/OFD1/VPS4A/NECTIN2/RAB1A/KIAA1324/BBS7/RFX2/CCDC40/EVI5L/TMEM67/DHXTUB/NKD2/PRAM1/RPL12/SRP14/FZD9/BLZF1/ATG3/RPS18/RPS28/RPS17/KCNIP3/RPL22/IKBKB

MUL1/TSC1/SHTN1/ACTR2/UNC13A/TTL/IFT140/CNTROB/BCL11A/FEZ1/CEP135/DPYSL2/NEFL/AP73/NME6/VRK1/RFWD3/NABP1/RAD9A/CEP250/RPA2/CUL4B/E2F6/TRIM71/HAUS6/NAE1/NDE1/

ACTR2  
/PRPF40A/AKAP17A/XAB2/ECD/SYF2/RBM15/XRN2/PTBP2/SNUPN/HNRNPH1/CWC15/WDR83/PAPOL

/NOLC1/SERBP1/ACE/NUP214/TSC1/TNFSF13/SMAD3/MYCN/PAIP1/RPL22/GEMIN5/MAEL/EIF3C/

















H3BP5L/ADCY6/ADORA2B/UBE2N/ADCY5/KITLG/KSR1/EREG/CCL19/PIK3R6/IRAK2/GMFB/DUSP18

N4/CSK/ACTR3/VAMP8/MAPKAPK3/PSMB5/CD33/BCL10/PSMA4/SPPL3/HSP90AA1/VCAM1/PSMD9/C  
MAP3K12/PDE5A/AFAP1L2/STRADA/RASGRP1/TNFRSF10A



SP46/TRIP12/KLHL22/ANAPC1/PCBP2/DNAJC18/UBXN2A/ZFAND2B/USP13/UBE2K/PSME2/TRIM3/  
/MVB12B/RNF149/PSMA3/PARK7/BUB3/RNF144A/SDF2/USP36/NUB1/UBQLN2/RNF121/CTSL/WWP2

RPL33/LARP1/YTHDF2/CDK5RAP1/MRPS5/CASC3/CHAC1/SNRNP70/RBM4B/YTHDF1/RPL13/RBM8A/  
/RNF149/PSMA3/PARK7/RNF144A/BRAP/BCOR/UBE2E3/CAND1/TRIM62/NUB1/MED20/RNF121/WWP  
XN2A/ZFAND2B/USP13/UBE2K/PSME2  
L7/RNF19A/BAP1/USP33/UGGT1/UGGT2/USP24/FBXL18/TSG101/FBXL2/CDC16/KAT5/UBE2R2/RA

CASP8/PTPN1/NOTCH1/RPS27A/PIAS4/MAVS/VEGFA/PLA2G1B/TLR2/TRAF4/BCL2L1/UBA52/DUSP









AP3K10/PIH1D1/DGKQ/CDK5R1/PRKAR1B/TPD52L1/DAXX/RHOA/STK3/GLMN/INHA/EMC10/RAPGEF





MINK1/RPLP1/TNFRSF14/MAPKAPK5/HBEGF/ADCY6/ADORA2B/UBE2N/ADCY5/KITLG/KSR1/EREG/C

RA2B/UBE2N/EREG/CCL19/XCL1/CD247/TLR7/HSP90B1/IRAK2/CAV1/TP53BP1/DAB2IP/ATAD5/I



TRPV6/PRSS12/WIPF2/KCNJ16/RAPGEF1/CLTC/ENPP2/AP1S1/ATP2B4/XKR8/GAK/ACTN4/SNX17/

/RALBP1/TM9SF4/SNX5/PROM2/PPARG/PIK3CB/MYO1C/LOXL3/ATP9A/SCARA3/SSC4D/NCKAP1/PL

BCL9L/PAK2/FNTA/SREBF1/CSNK2B/HSPA5/UBA52/LMTK2/AP2A2/DGKQ/PPP2R5B/CDC37/CDK5R1



ARF1/PRKRA/CCDC130/IRAK2/ATG7/SNX3/SERPINB9/CCL8/CAV1/ATP7A/DAB2IP/HMGA2/GTF2F1

ARF1/PRKRA/CCDC130/IRAK2/ATG7/SNX3/SERPINB9/CCL8/CAV1/ATP7A/DAB2IP/HMGA2/GTF2F1

YP27B1/CCL19/FAM3A/KPNA6/SEH1L/XCL1/TLR7/MUS81/ARF1/PRKRA/CCDC130/IRAK2/ATG7/SN  
/CASC3/CHAC1/RBM4B/YTHDF1/NMRAL1/RPL13/RBM8A/METTL3/CARS2/MRPL36/MOV10/QRSL1/RP



NMT1/KIF5B/DMTN/WWP2/HYAL2/HTRA2/IFNG/ANXA1/ARIH2/AIM2/TERF1/HLA-E/CHGA/SUPT6H/

R1/EREG/MECOM/CCL19/XCL1/NOTCH2/BMP8B/PIK3R6/CCL3L3/SH3RF3/NPNT/IRAK2/DUSP18/OS  
KCB/NLRC4/BPIFB1/PTPRS/PIK3R2/CLEC4A/VAV3/APPL2/RPS6KA3/SLA2/TLR1/S100A1/WNK1/N





RTN/KSR1/EREG/MECOM/CCL19/XCL1/NOTCH2/BMP8B/PIK3R6/CCL3L3/SH3RF3/NPNT/IRAK2/DUS











M21/EGLN2/UBA52/EDEM2/NANOS1/RHBDD3/CDC37/CDK5R1/PSMC3/NDUFA13/TWIST1/EXOSC1/NR



/RBM10/MEX3D/BECN1/WDR6/SEH1L/RBM24/EIF6/EIF4G2/UBAC2/ATG7/HTT/KHSRP/HAX1/EGF/C







2/CAV1/MAP4K2/ARL1/B3GALT6/HS6ST2/ARFGEF1/PKD1/LITAF/LMAN2L/CYTH3/HS2ST1/ST8SIA  
TNKS1BP1/ACTR6/PURB/NFATC1

PC2/SPNS1/CTSW/BRI3/HEXA/SNAPIN/AP2A1/IST1/VPS33A/SEH1L/VASN/TLR7/RAB9A/NAPG/AT

CH/ARPC1A/EXOSC3/CKAP5/SUV39H2/EID3/PRPF19/ESCO2/RAD51C/SEC13/PTGES3/NAT10/RARG  
5/RPL5/RPS27A/NBN/NOL6/RPF2/PLK3/BMT2/POP5/NVL/SP140/MOB2/LLPH/MED27/GNAI3/EXOS  
PC2/SPNS1/CTSW/BRI3/HEXA/SNAPIN/AP2A1/IST1/VPS33A/SEH1L/VASN/TLR7/RAB9A/NAPG/AT

BIM1/SLC17A5/SLC15A4/TRIM21/BCAN/UBA52/HLA-F/AP2A2/VAC14/ACAN/RAB29/BORCS6/TMEM  
/SPPL2B/BCAS2/IFT81/STOX1/PCNT/KLHL22/TUBGCP2/ZFYVE26/CEP78  
1/VPS4A/YTHDF2/CTDP1/BBS7/TMEM67/C2CD5/SPACA9/CEP72/KIF3A/TRIP4/EFHC1/PSKH1/ARM

/CLTC/TAPBP/AP1S1/AP1S3/TAP2/AP1S2/SNX17/STXBP5/GOSR2/RAB27B/AP2B1/HBEGF/MANBA/

/STK4/IK/PPP1R8/PSKH1/POLDIP3/THOC7/TRIM27/DDX20/PARK7/GEMIN8/USP36/ZC3H18/THOC

/CYB5R3/VDAC2/VEGFA/GNAI3/GLIPR1/RAB3A/HEXB/ACTN1/CYB5R1/PLA2G1B/TLR2/CSNK2B/TM  
R2/RAB27B/AP2B1/HBEGF/MANBA/COPB1/BTC/BRI3/SNX22/SNAPIN/TMEM184A/AHNAK2/SGSM1/A  
AT1/CSNK2A1/DCTN1/USF1/MBD3/NBN/CAPN2/HNRNPU/RNF2/ANP32E/RAD18/SYCE1L/ERCC1/EXO  
MUC6/BCAN/HLA-F/RTN1/B4GALT4/VAC14/RAB11A/ACAN/RAB29/YIPF2/MUC15/GOLPH3L/NOTCH3

B1/CD274/SNX21/SNX2/EHD3/TGFBRAP1/SLC30A3/INPP5F/STX8/PLEKHF2

1B/RAB8B/RAB1B/MX1/RPS6/CNP/VAPA/LRPPRC/COPS8/RHPN2/GLB1/SH3RF1/PLA2G2A/SLC30A7

T11/IFT20/CLTC/TAPBP/AP1S1/AP1S3/AP1S2/TJAP1/GOSR2/RAB27B/ACER3/COG4/ATG9A/COPB

NC1/WIPF2/CACNA1D/RASSF5/NEK6/CLTC/ATP2B4/ENKD1/ACTN4

NC1/WIPF2/CACNA1D/RASSF5/NEK6/CLTC/ATP2B4/ENKD1/ACTN4

/ATP6VOD1/FCGR3B/HPSE/RAB4B/S100A7/KCNAB2/GCA/HSPD1/PAFAH1B2/RAB3D/ARPC5/VCP/VC  
A1D/RASSF5/NEK6/CLTC/ATP2B4/ENKD1/ACTN4

C3/MRPL37/PPIE/UTP20/RPS11/RBM14/EIF3E/CAPRIN1/RPL22L1/NOB1/HNRNPL/SF3B3/NSUN4/



/RAB3A/PACSIN2/GGA3/TMBIM1/UBA52/HLA-F/LMTK2/AP2A2/VAC14/RAB11A/RAB29/YIPF2/MIT  
DPY30/RNF144A/BRAP/BCOR/CCNG2/POLR3F/CAND1/ERH/ULK1/MED20/PIGA/POLR2B/WWP2/PIK3





AR1/ADGRL1/UCN/KCNC4/BCR/NCSTN/EPB41/NEURL1/IGSF21/SYT11/ATP2B1/PARK7/MCTP2/PDE



RT16/CD4/PXDN/MRPL24/MRPS16/RPL10A/ANXA1/MRPL55/MYL6/RPL12/MRPS2/RPS18/RPS28/CO

NA1/DNM2/PTK2/SPIRE1/CCSAP/DCTN1/SSH2/HAUS7/INPPL1/CAPN2/KATNA1/BICD1/PDLIM4/MY  
3K11

/RHOA/ARF5/ACTR5/RFC5/DDX10/ENPP2/TAPBP/ATP2B4/DHX15/MRAS/TAP2/RAB27B/DHX9/SMAR  
/RHOA/ARF5/ACTR5/RFC5/DDX10/ENPP2/TAPBP/ATP2B4/DHX15/MRAS/TAP2/RAB27B/DHX9/SMAR  
/RHOA/ARF5/ACTR5/RFC5/DDX10/ENPP2/TAPBP/ATP2B4/DHX15/MRAS/TAP2/RAB27B/DHX9/SMAR  
RAS/TAP2/RAB27B/DHX9/SMARCA5/BMS1/GTF2H1/PSMC5/IFT22/DDX55/TOR3A/SMARCAL1/NTPCR  
4K2/DAB2IP/RPTOR/HDAC5/CALM3/PGAM1/CIB1/PKD1/DUSP22/BORA/PTPRC/STUB1/CDK5RAP1/S  
8A/PLA2G6/RHOH/CCNG2/KIF5B/CD4/HYAL2/JTB/PRKCSH/WDR45/RELA/CCNJ/PRAM1/PPP1R12A/  
1/INPP5D/CALM3/ARHGAP27/PKD1/ARHGAP17/STUB1/LITAF/LLGL2/TADA3/VPS4A  
ALM2/SIPA1/ARAP1/BAG2/TBC1D7/CCND3/BAD/SGSM3/DBNL/PSAP/ARHGAP11A/BCL10/BOD1/HSP

NK2A2/EPHA10/RPS6KC1/RPAP1/SRPK2/PCYT1A/IP6K2/STK35/VRK2/PIK3CB/AK6/ADCK2/CSNK1







/DUSP26/HMGN3/C1QBP/APEX1/PDX1/MED14/NLRP3/TAF4/ARRB1/SP1/PARD6A/ZNF516/TAF2/PU







1/MBD2/NKRF/NR6A1/MAX/RELA/NSD1/AIM2/TERF1/LHX2/AKAP8/ZNF219/KDM3A/POU2F2/MBD1/

CTDNEP1/RANBP1/PRIM2/APP/MYBL1/PSMD4/CETN2/PSMD3/RBX1/ACTL8/PPP5C/PSMD7/RAD21/K  
PRIN1/RHOA/STXBP1/ENPP2/ROBO3/ACTN4/PDPN/MINK1/HEG1/NIN/NRTN/SPTAN1/PARVB/EPHA2  
/SYT11/ATP2B1/PARK7/IRF4/PDE4B/POLR3F/CD4/HYAL2/NFATC2IP/IFNG/ANXA1/RELA/AIM2/C  
/APPL2/TLR1/MUL1/TRIM56/NOD2/BAP1/ARG2/XRCC5/SMAD3/CPTP/LILRB1/RNF135/AFAP1L2/C

ORA2B/BRI3/CCL19/IST1/NOTCH2/DOCK10/MSH6/ITGAL/ATP11A/ATG7/DPP7/IL13RA2/ATP7A/T

B/BRI3/CCL19/IST1/NOTCH2/DOCK10/MSH6/ITGAL/ATP11A/ATG7/DPP7/IL13RA2/ATP7A/TP53B  
3/HLA-F/AP2A2/ATP6AP2/SLC2A3/TSPAN14

SM/IL17D/BARX1/HAX1/LDB1/ATP7A/TP53BP1/PKNOX1/ATAD5/THOC1/PREX1/DCLRE1C/RPS14/I

5/POLR3D/LBP/ARPC1A/POLR3C/EXOSC3/BTN2A2/CCL3/S100A7/ZNF335/BRK1/HSPD1/PSMD8/CX

PIRE1/CEP164/RPS27A/MBD3/NBN/MAGEF1/HNRNPU/NVL/PIAS4/RAD18/ERCC1/TSN/EXOSC10/CC

MAP3K12/BAZ1A/TP53/IWS1/INO80E/PHF20/KAT5/KDM3B/NEK11/HMGN3/SUZ12/MSL3/BAZ1B/SE  
PRKB/NOL10/RSL1D1/GTF2H1/RNMT/ZFC3H1/TYW3/CCAR2/RBM10/USP39/SNRNP25/RBM15B/AHNA  
MRPL55/EIF2AK1/SYNCRIP/CHCHD1/EIF4G1/CNOT2/RPL12/EIF2B2/MRPS2/SESN2/RPS18/RPS28  
BIN2/RAB5C/DBNL/PSAP/CD33/HSP90AA1/C12orf4/THBS1/NOTCH1/VPS45/SRGN/CFTR/CD177/M

0/STXBP4/HPF1/CCAR2/POLE3/RPA1/UBE2N/EPHA2/MMS19/RBM24/SMARCA1/CNOT3/MUS81/TFD

2/TRPT1/RBM41/PLRG1

/KLHL21/RBM14/RHOA/NEK6/YWHAG/CLTC/ATP2B4/FAP/PSMC5/CNOT10/STXBP4/BTC/BECN1/FBX

RK7/PNMA5/IGF2R/NMT1/MYC/SLFN11/TIAM2  
19/HNRNPA1/UBR5/PSMC3/VPS37B/CXCR6/PP1E/POLR2I/PP1B/TLN1/RPS11/POLR2J/DAXX/RHOA  
CAR2/RBM10/MEX3D/USP39/SNRNP25/RBM15B/LUC7L/EREG/TSEN15/RBM24/CDK11A/SSU72/SF3B

I/RAPGEF1/IFI6/ACTN4/IL17RA/SIGIRR/TNFRSF14/NR1H2/IFITM3/PSMC5/UBE2N/EREG/CCL19

B2/XRN2/PTBP2/SNUPN/SHQ1/SMN1/NOP14/ABT1/CNOT1/GTF3A/EIF3J/CRNKL1/MTG2/SF1/USP4  
TXR1/SPIRE2/ABRACL/ARHGEF18/NCKAP1/PPP1R9A/LPAR1/PXN/TRIM32/CSRP2/CCDC88A/BCR/D

SMB1/ACIN1/PRRC2C/MOV10/ASXL1/STK4/RPS6/NFKBID/PSMB6/CASP3/CHD7/ADAR/CLPTM1/SMA

/HSP90B1/USP48/UBE4B/UBAC2/AUP1/MAEA/ATG7/SNX3/CACUL1/EGF/HSPA13/CAV1/NEDD8/DAB

P2A1/ARTN/IST1/UBE4B/ARF1/DOCK10/NEO1/SNX3/RAB13/ATP7A/DAB2IP/CAMSAP1/PREX1/EPH

B/BCL11A/FEZ1/CEP135/DPYSL2/NEFL/ARPIN/RTN4IP1  
4/SKP2/PSMB1/WWTR1/SUMO2/PIN1/WDSUB1/FBXO10/KCMF1/TRIM32/PSMB6/BTBD1/RPL11/ENC1  
PLA2G1B/TLR2/SREBF1/TMBIM1/BCL2L1/CD2AP/EDEM2/RAB11A/ZPR1/RAB29/KIF20B/GOLPH3L/  
F5/PPHLN1/RPL13A/VPS11/AP3B1/YWHAG/ATG13/ABHD17A/IFT20/GAK/SIX1/RPL37A/GOSR2/RP  
3/COX19/CENPQ/DBNL/EIF3K/HSP90AA1/PRKAA2/RPS15/CHD1L/PSMD9/PTK2/SPIRE1/EIF3M/HA  
SP3/GTPBP1/LRPPRC/RPL11/RPL10/HNRNPD/RPS24/ZHX2/PSMA3/AAAS/DCP2/PYM1/HNRNPC/UNG  
2/SNAPC1/WDR74/SP1/DUS3L/WDR18/TARBP1/TRMT10C/ANKRD16/METTL6/AIMP1/MRM1/CDKAL1

24/MRPS16/EIF5B/RPL10A/FXR1/MRPL55/EIF2AK1/SYNCRIP/CHCHD1/EIF4G1/CNOT2/RPL12/EI

HMGA2/ATAD5

T20/STXBP1/SIX1/WDR75/FNBP1L/GTF2H1/MTPN/NIN/SPTAN1/PSMC5/FAF1/RPA1/BECN1/DPYSL

NS1ABP/BCL2L1/RPL36/UBA52/AP2A2/DYNC1I2/VAC14/THOC2/RAB29/TARBP2/RPL19/HNRNPA1/  
/RPL6/HTATSF1/BNIP3L/RPL37/PAK2/RPL27A/OAS3/TRIM21/IVNS1ABP/BCL2L1/RPL36/UBA52/

4/VPS4A/CTDP1/PAF1/ZNF16/CEP72/DBB1/SKP2/PSMB1/IK/RPS6/RPL24/PSMB6/CDC23/PSMA3/  
1/CYB5R1/TLR2/CSNK2B/TMBIM1/SLC15A4/ANXA3/HLA-F/AP2A2/PCYOX1L/ATP6AP2/SLC2A3/TS  
13A/STXBP1/IFI6/MAP3K1/LGMN/TNFRSF14/DHX9/NR1H2/IFITM3/PSMC5/STXBP4/UBE2N/CYP27

MIZ1/NIN/RBPJ/ADM/BTC/DPYSL3/CYP27B1/AP2A1/KITLG/CCL19/IST1/RBM24/ZC4H2/ARF1/PI

B/WWTR1/ADCY7/PPP1R9A/LPAR1/STK4/MAP3K7/UCN/CASP3/CCDC88A/ADAR/COPS8/NAB2/TRIM2  
SLA2/TSC1/NOD2/ARG2/TNFSF13/SMAD3/RPL22/LILRB1/PDE5A/FUT7/CD80/TP53/SOX13/RASGR

PRC/YTHDF2/CLEC4E/PAF1/IKZF3/ZNF16/ADD1/METTL3/PPARG/JUNB/LOXL3/PSMB1/ACIN1/PRR

HNRNPC/BCOR/AURKAIP1/UBQLN2/ULK1/TCHP/DMTN/PRMT6/CEP97/PAM16/HTRA2/ASF1A/TRIM46

L1/DAXX/RHOA/STK3/GSKIP/RFC5/RAPGEF1/YWHAG/ATG13/CNPPD1/ATP2B4/PRKAG1/PIK3R5/MA  
ARG/RSU1/ANTXR1/DOCK8/PIN1/PLCG1

TRL/TSNARE1/VAMP3/KIF5B/ADGRE2/RAB3C/CEP97/RAB3IP/NPHP1/TRIM46/VPS33B/FAM98A/MA

ATG13/ABHD17A/CLTC/STXBP1/ANP32B/AP2B1/DHX9/GPC2/DMAP1/STXBP4/ADORA2B/BECN1/SNA  
/PEF1/EGF/CAV1/TMEM102/SYNJ2/CALM3/EPHB2/GET4/CD3G/PTPRC/VPS4A/NECTIN2/RAB1A/BA

U1/JOSD1/UBE2F/MED7/UNKL/ZMIZ1/PSMC5/ARRDC1/USP39/BECN1/FBXL7/UBE2N/ANAPC5/HECT30/FEZ2/CEP72/WWTR1/KIF3A/RAB1B/NIP7/STAM/CSRP2/RPL24/OGFOD1/ARMC9/CCDC88A/TBC1/TP53/GRIPAP1/GGA2/RPS15A/PIP5K1A/CHMP4A/RER1/RILPL2/DAG1/RFTN1/DVL1/SRP72/PEX1

RPIN/RTN4IP1

ZWILCH/DRG1/CKAP2/KHDRBS1/CKAP5/DBF4B/BTN2A2/MZT1/ANKLE2/RAD51C/BTG2/PSMD8/ACVR

A/SMN1/HNRNPH2/CRNKL1/SF1/HNRNPH3/LEO1/TUT1/AHCYL1/CIR1/ZMAT2/USP4/CWF19L1/SF3A

TP53/DDX1/TARDBP/EIF1/ATXN2/C1QBP/APEX1/PARN/TDRD7

















/CACUL1/HTT/EGF/MAP4K1/CAV1/LDB1/MAP4K2/DAB2IP/HMGA2/RPTOR/CALM3/EPHB2/CIB1/PKD

12orf4/PTK2/PTPN2/CASP8/PTPN1/RPS27A/CD177/MAVS/DMBT1/PLA2G1B/IL20RB/PAK2/TLR2/



HACE1/COPS3/YOD1/HSPA1A/RMND5B/USP28/PSMD6/PCNP/USP4/RNF139/PSMC2/DIS3L2/USP32/  
/HTRA2/CTSB/ARIH2/RNF126/TLK2/ANAPC15/PSMB7/NKD2/RNF115/SKP1/ANKIB1/ADAMTS12/RN



METTL3/CARS2/MRPL36/PIN1/MOV10/QRSL1/RPL4/SARS2/RPL41/ABCA7/RPL9/MRPL14/RPS6/EI  
2/ARIH2/RNF126/PSMB7/RNF115/SKP1/ANKIB1/MED30/MKRN1/ATG3/RNF186/DERL1/KCTD13/UB  
D23A/SVIP/PPP1R11/DVL1/DERL3/CLEC16A/RNF41/UBE2J1/ARRB1/PSMD12/BFAR/ARMC8/SMURF  
7/MAP3K10/PIH1D1/CRLF3/MEIS3/GOLT1B/TPD52L1/PLAGL2/RUNDC3A/DAXX/RHOA/STK3/NEK6/







1/ATG13/ENPP2/ATP2B4/PRKAG1/PIK3R5/MAP3K1/MINK1/RPLP1/TNFRSF14/MAPKAPK5/HBEGF/T





CL19/XCL1/FIZ1/NOTCH2/BMP8B/PIK3R6/CCL3L3/SH3RF3/NPNT/IRAK2/CRLF1/OSM/CACUL1/CC



NPP5D/DUSP22/CD3G/PTPRC/NECTIN2/CLEC4E/BAG6/ZCCHC3/BTN2A1/CNR1/CD1A/NFKBIL1/PIK

RAB27B/AP2B1/FNBP1L/DOCK2/NR1H2/ELMO2/KCNH2/ADM/BECN1/AP2A1/LRPAP1/CCL19/CD247/

CG1/CSNK1G1

/SULF2/HNRNPA1/PARD3/POLR2I/POLR2J/RBM14/RHOA/INHA/RAPGEF1/IFT20/POLR2D/IFI6/AP



/HDAC5/ZC3HAV1/PTPRC/LITAF/BMP2/PABPN1/CLEC4E/RAB1A/ZCCHC3/PAF1/IKZF3/HNRNPUL1/

/HDAC5/ZC3HAV1/PTPRC/LITAF/BMP2/PABPN1/CLEC4E/RAB1A/ZCCHC3/PAF1/IKZF3/HNRNPUL1/

X3/SERPINB9/CCL8/CAV1/ATP7A/DAB2IP/HMGA2/GTF2F1/HDAC5/ZC3HAV1/PTPRC/LITAF/BMP2/  
L4/SARS2/RPL41/RPL9/MRPL14/RPS6/EIF2B4/UCN/RPL24/OGFOD1/GTPBP1/UNK/LRPPRC/POLDI



MAP4K4/PIK3R2/NOLC1/PTPN14/KCNS3/UBL5/TLR1/NOD2/HDAC3/BAP1/ARG2/SMAD3/CPTP/LILR



M/CCL8/CAV2/EGF/MAP4K1/CAV1/MAP4K2/DAB2IP  
OD2/BTN3A2/XRCC5/EIF2B3/ACTR2



P18/OSM/CCL8/CAV2/EGF/MAP4K1/CAV1/MAP4K2/DAB2IP













DC/CHFR/SF3B3/SLC25A12/GLMN/VPS11/HNRNPR/ATG13/IFT20/ATP2B4/PRKAG1/ANP32A/FAP/W

AV1/DAB2IP/RPTOR/ATP6V1B2/PGAM1/PKD1/EXOSC2/CSNK2A2/ZC3HAV1/STUB1/LARP1/YTHDF2/







4/RAB1A/PLD1/PLEKHA8/RAB36/GCNT1/B3GNT8/ERGIC2/RHBDD2/QSOX2/ACBD3/SCARA3/CD59/R

P11A/EGF/PI4K2A/DPP7/DAGLB/RPTOR/ATP6V1B2

/DNA2/HSPA2/ARPC5/DOT1L/RAD51D/VCP/WRAP53/MTA3/NSFL1C/UBQLN4/DCLRE1B/FAAP20/EMEC9/EXOSC10/BCL9L/MOB1A/TMA16/PAK1IP1/NOL7/TAF1D/EXOSC7/UBTF/ARL6IP4/DDX56/RPL36P11A/EGF/PI4K2A/DPP7/DAGLB/RPTOR/ATP6V1B2

138/TECPRI1/ARL8B/AGA/VPS11/AP3B1/CLTC/AP1S1/AP1S3/AP1S2/AP2B1/LGMN/WDR41/IFITM3

C9/CCDC88A/NUBP2/LRRC45/CC2D1A/PHF1/PLA2G6/AAAS/C2CD3/PRICKLE3/LRWD1/PDE4B/CNTR

COPB1/BTC/BRI3/SNX22/SNAPIN/TMEM184A/AHNAK2/SGSM1/AP2A1/EREG/COPA/RAB9A/ITGAL/A

3/CENPT/DYRK3/MAMLD1/RDM1/MAX/GEMIN6/SMN2/ATP6V0A1/TERF1/CLK2/HNRNPA2B1/GON4L/M

BIM1/SLC15A4/ANXA3/AP2A2/PCYOX1L/ATP6AP2/SLC2A3/TSPAN14/MLEC/PSMC3/PPIE/PLA1A/AP2A1/EREG/COPA/RAB9A/ITGAL/ATP11A/KLHL12/HTT/CAV2/PEF1/EGF/CAV1/RAB13/ATP7A/CALSC10/CSNK2B/COPS5/MIS18A/PHF6/THOC2/MECP2/RBMX/KIF22/BAZ2A/NCAPD3/EIF3E/SRF/DAX/GORASP2/SLC35B1/SULF2/SLC35A4/TMEM115/CHST3/TMEM87A/GOLT1B/ZDHHC9/ERGIC3/TMEM1

/NEURL1/SYT11/PARK7/IGF2R/ZDHHC20/VAMP3/KIF5B/RAB3C/DMTN/FIGNL1/HYAL2/FXR1/CTSB

1/BECN1/PSEN2/SNAPIN/COG2/TMEM167A/NOTCH2/TLR7/TMEM167B/ARF1/STEAP2/BET1L/COPA/

L/APRT/PDAP1/GHRHR/MFF/THBS2/HVCN1/STX7/VAMP8/BIN2/RAB5C/MOXD1/DBNL/PSAP/CD33/L

RPL13A/MRPL27/MRPL28/HNRNPR/POLR2D/SART3/DHX15/ACTN4/TGS1/RPL37A/MRPL51/MRPL11/



D1/DGKQ/ARL8B/VPS37B/CYTIP/RHOA/VPS11/RAPGEF1/ABHD17A/CLTC/SNX17/TJAP1/GOSR2/RA  
C2B/MAX/ARIH2/DYDC2/ANAPC15/CCNJ/RPN1/SKP1/POLR1C/ANKIB1/MED30/POLR3A/KMT2B/SES





4B/VAMP3/RAB3C/RPL14/DMTN/RPL10A/FXR1/ANXA1/VAMP1/NETO2/RPL12/FZD9/PTPRA/SEMA4C



L24A1/TUBD1/RPS17/MXRA5/NUP214/RPL26L1/LAMA1/ACTR2/RPL22/AEBP1/MRPL21/COL4A1/CO  
L9/HNRNPU/FLII/MAP1A/NEBL/RAB3A/ACTN1/MARK4/RITA1/MAP7D3/LZTS1/ADD3/FNTA/MYO6/P  
CA5/BMS1/GTF2H1/PSMC5/IFT22/DDX55/TOR3A/SMARCAL1/NTPCR/ARF1/LSG1/MFN1/RHOBTB2/R  
CA5/BMS1/GTF2H1/PSMC5/IFT22/DDX55/TOR3A/SMARCAL1/NTPCR/ARF1/LSG1/MFN1/RHOBTB2/R  
CA5/BMS1/GTF2H1/PSMC5/IFT22/DDX55/TOR3A/SMARCAL1/NTPCR/ARF1/LSG1/MFN1/RHOBTB2/R  
/ARF1/LSG1/MFN1/RHOBTB2/RAB9A/MSH6/RAB40C/EP400/HSPA13/RAB13/ATP7A/SRCAP/ATP6V1  
RSF2/ARHGAP33/ATP1B1/VRK2/HNRNPA0/PIN1/PLCG1/PPP1R9A/TRIP4/UTRN/RPS6/MAP3K7/PXN  
NELL2/PRKCB/CDK5RAP2/PPP1CB/RHOD/ELAVL1/PIK3R2/MAP3K11/RPS6KA3/PTPN14/ACE/WNK1/  
90AA1/SRGAP2/PRKRIP1/STYXL1/TNK2/CCNJL/UBA2/PPP2R3A/RPL5/DUS2/NOTCH1/PPP1R12C/A

G1/CASK/STK4/POLG2/MAP3K7/PSKH1/RIOK1/PPIP5K1/BCR/FASTKD5/PIP4K2B/CKB/IGF2R/CCN









RB/GATA4/NFATC1/MAFK/MED6/MAPK9/ZNF653/CRTC1/HDGF/TRIP12/STAT3





ZNF202/SMAD2/E2F7/WBP2/ZMPSTE24/HOXB9/PLAGL1/KCNIP3/BRF2/ZNF431/PBX3/ORC4/ESRRA

ATNB1/RRM1/MTBP/WRAP73/NME6/VRK1/RFWD3/GADD45GIP1/NABP1/RAD9A/CEP250/RPA2/CUL4E  
/ARTN/IST1/VPS33A/RHOBTB2/DOCK10/NEO1/ATP7A/DAB2IP/CAMSAP1/PREX1/EPHB2/CIB1/SLC  
CR2/AKAP8/POLR1C/CHID1/POLR3A/HLA-E/CHGA/NOD1/LTBP3/TRIM15/NLRC4/PTPRS/CLEC4A/A  
D80/DDX1/RASGRP1/LILRB2/MAPKBP1/KAT5/C1QBP/PPP1R11/OTUD5/ZBP1/NLRP3/TICAM1/UBE2

P53BP1/CD84/ATAD5/THOC1/TCN1/PGAM1/DNASE1L1/ZNF683/PTPRC/CLEC4E/PLD1/HUWE1/CST3

P1/CD84/ATAD5/THOC1/TCN1/PGAM1/DNASE1L1/ZNF683/PTPRC/CLEC4E/PLD1/HUWE1/CST3/SLC

NPP5D/HDAC5/CIB1/ZNF683/CD3G/PTPRC/YTHDF2/CLEC4E/PAF1/IKZF3/ZNF16/ADD1/METTL3/F

CL17/AKIRIN1/ARPC5/ABL1/SART1/FCGR2B/PSMA1/TNFAIP3/TOX/STX7/KCNN4/CSK/ACTR3/VAM

NE2/UIMC1/COPS5/MIS18A/ANXA3/UBA52/GLI1/ZPR1/MORF4L2/MECP2/KIF22/FANCF/HNRNPA1/

TMAR/L3MBTL1/ACTR8/NACC2/MEN1/ARRB1/ACTR6/TPR/RNF40/EZH1/MCM3AP/OGT/RCCD1/KANSL  
K2/DIMT1/EBNA1BP2/LUC7L/TSEN15/NOL9/RBM24/DPH3/CDK11A/SSU72/UTP23/SF3B2/STRAP/R  
/ELAVL1/RPS17/RPS6KA3/NOLC1/ABTB1/RPL26L1/TSC1/PAIP1/RRBP1/EIF2B3/RPL22/GEMIN5/  
IAN2B1/CTBP2/OLFM4/CYB5R3/VEGFA/GLIPR1/RAB3A/HEXB/ACTN1/CYB5R1/TLR2/CSNK2B/COPS5

P1/SUV39H1/POLR2E/UBE2E2/SMUG1/MSH6/MORF4L1/POLE2/ATR/TP53BP1/HMGA2/ATAD5/PARP1

L7/ANAPC5/EREG/CDC27/CNOT3/UXT/TFDP1/UBE2E2/MSH6/SND1/CAV2/EGF/DAB2IP/HMGA2/RPT

/RPL13A/AP1S1/AP1S3/POLR2D/TAP2/AP1S2/RPL37A/AP2B1/RPLP1/DOCK2/TNFRSF14/DHX9/IF  
2/CNOT3/STRAP/LSM1/SFSWAP/POLR2E/SAFB2/RPS9/CCAR1/KHSRP/MFAP1/PRPF4/THOC1/RPS14

/XCL1/HSP90B1/ARF1/CCL3L3/SPATA2/IRAK2/CRLF1/OSM/CCL8/IL13RA2/CAV1/TRIM68/INPP5

/WDR43/SF3A1/NSA2/CLP1/MRPS9/NUDT21/EIF2A/TSR2/DDX18/EIF2S1/GEMIN4/GNL3L/NCBP1  
SC2/ATP2C1/EPB41/TRIM27/CAPZA2

D5/BCR/MFHAS1/NCOA6/SH3RF1/RTKN2/DPY30/PSMA3/ANKRD54/IRF4/RHOH/AGO1/MYC/BGLAP/A

2IP/GET4/FBXO6/PKD1/CSNK2A2/STUB1/ANAPC4/VPS4A/ATRAID/BAG6/HUWE1/BBS7/CST3/SNX5

B2/ARFGEF1/CIB1/SLC9A6/EPHA10/ARHGAP33/YTHDF1/ADNP/FEZ2/CNR1/RYK/PIK3CB/PLXNB2/

/NXN/CDC23/KLHL25/TRIM27/SH3RF1/NEURL1/RNF149/PSMA3/AAAS/PARK7/EGR2/RNF144A/BRA  
RHBDD3/CENPJ/CACNB3/ALOX15B/CDK5R1/UBR5/PPM1F/TWIST1/APBB1/CACNA1D/RASSF5/GLMN/  
LP1/DHX9/PMM2/RPL32/TNPO1/DMAP1/IPO9/RPL30/NXT2/RPA1/BECN1/KPNA6/TFDP1/IPO4/UBA  
T1/STYXL1/DCTN1/RPL5/RPS27A/GTF3C5/RPF2/PFDN6/BICD1/THRA/VDAC2/RPL6/RAB3A/MAP7L  
/PDE4B/RPS3A/AGO1/RPL14/APOBEC3F/PAM16/RPL10A/FXR1/IFNG/SYNCRIP/EIF4G1/PSMB7/DN  
/XRN2/GTF3C4/TRIT1/ADAT2/ELP6/SHQ1/NOP14/ABT1/ICE1/GTF3A/GTF2B/DEDD2/TUT1/INTS3

F2B2/MRPS2/SESN2/RPS18/RPS28/ELAVL1/GGT6/RPS17/RPS6KA3/NOLC1/ABTB1/RPL26L1/TSC1

3/EPS8L1/DIMT1/EPHA2/CORO2B/CCL19/CDC34/ARF1/RHOBTB2/KLF5/GMFB/NPHP4/GPBAR1/HTT

UBR5/PSMC3/VPS37B/CXCR6/PPIE/POLR2I/PP1B/TLN1/RPS11/POLR2J/DAXX/RHOA/RPL13A/AP1  
AP2A2/DYNC1I2/VAC14/THOC2/RAB29/MECP2/TARBP2/RPL19/HNRNPA1/UBR5/PSMC3/VPS37B/CX

BUB3/CNTRL/CCNG2/MYC/SLFN11/HUS1/BRD7/DYRK3/BRD4/MAX/ANXA1/MAPK15/EIF4G1/HAUS2/  
PAN14/MLEC/PSMC3/PPIE/TRPV6/TLN1/AGA/ADGRG3/CACNA1D/SIGLEC9

B1/EREG/CCL19/FAM3A/XCL1/TLR7/HSP90B1/PIK3R6/CCL3L3/IRAK2/SERPINB9/CCL8/CAV1/CL

K3R6/KLF5/NPNT/SNX3/HAX1/DAB2IP/DKK1/PREX1/INPP5D/EPHB2/CIB1/PTPRC/BMP2/ATRAIL

7/MADD/NEURL1/ANKRD54/PARK7/PDE6G/CCNG2/SLC27A1/MLLT1/CD4/HYAL2/JTB/IFNG/CCNJ/I  
P1/FGL2/LILRB2

C2C/MOV10/ASXL1/STK4/RPS6/NFKBID/PSMB6/CASP3/CHD7/ADAR/CLPTM1/SMAD5/BCR/MFHAS1/

/SEMA6B/ANAPC15/TERF1/FZD9/SUPT6H/KDM3A/SEMA4C/ATG3/CDK5RAP2/MAP4K4/PTPRS/RAB7A

P3K1/GPS1/SOCS7/MINK1/RPLP1/MAPKAPK5/HEG1/GTF2H1/TIGAR/FAF1/SH3BP5L/ADCY6/ADORA

PK15/HAUS2/TERF1/VAMP1/ARCN1/TFG/CHGA/PRKCB/CNIH2/CDK5RAP2/FAM91A1/DOCK7/CHRNA5

PIN/EPHA2/ADCY5/XCL1/MRAP2/CLIC2/CD247/ARF1/TFDP1/UBAC2/SNX3/HTT/HAX1/EGF/IL13R

G6/PLEKHA8/VPS16/C2CD5/NAIF1/ATP1B1/SPACA6/PPARG/ATP2A2/ATP9A/RAB8B/SPIRE2/CD59

D3/CDC27/SEH1L/CDC34/USP48/UBE4B/UBE2E2/SH3RF3/PEX10/SPATA2/RAB40C/MAEA/ATG7/RN  
D20/RPL11/RPL10/PIP4K2B/NEURL1/AAAS/ERAL1/C2CD3/CNTRL/MRPL20/CENPT/UBQLN2/ULK1/  
6

.1/TAF10/PIDD1/DNA2/HSPA2/PKIA/EMD/VCP/PSMA1/MTA3/NSFL1C/DCLRE1B/EME2/CHEK2/CLSF

.1/SRSF4/GPATCH1/RPRD2/PDCD7/CLP1/NUDT21/CLASRP/RBM4

















1/DUSP22/BORA/PTPRC/BMP2/ADCY3/CDK5RAP1/ZNF16/CXCL10/ADNP/PIK3CB/WWTR1/ADCY7/PF

MUC6/UBA52/HLA-F/IFNAR2/RAB29/MUC15/CACNB3/CDC37/PLD2/PSMC3/UBE2D2/STOML2/WIPF2





WAC/PSMA6/RLIM/RNF215/CUL2/FBXW11/VPS37A/ERLEC1

F186/DERL1/RAB7A/KCTD13/ZMPSTE24/UBR4/CUL7/RNF19A/BAP1/USP33/UGGT1/UGGT2/USP24/

F2B4/UCN/RPL24/OGFOD1/CASP3/GTPBP1/UNK/LRPPRC/POLDIP3/RPL11/ENC1/RPL10/NCSTN/KL  
R4/CUL7/RNF19A/MUL1/TRIM56/NOD2/HDAC3/TULP4/RNF10/RNF135/FBXL18/TSG101/FBXL2/CL  
2/RNF40/OGT/MAPK9/CDC26/SOCS5/USP46/TRIP12/KLHL22/ANAPC1/PCBP2/DNAJC18/UBXN2A/A  
EMC10/RAPGEF1/ACTN4/PIK3R5/MAP3K1/MINK1/CXXC5/MAPKAPK5/HBEGF/ADORA2B/BTC/BECN1/







TGAR/ADCY6/ADORA2B/UBE2N/ADCY5/KITLG/KSR1/EREG/CCL19/XCL1/FIZ1/NOTCH2/BMP8B/PIK







L8/CAV2/HAX1/EGF/MAP4K1/CAV1/MAP4K2/DAB2IP/HMGA2/RPTOR/CALM3/CIB1/TMEM106A/PKD1

3CB/MY01C/PSMB1/SCARA3/CD59/NCKAP1/PLCG1/TLR8/EIF2B4/MAP3K7/NFKBID/PSMB6/FFAR2/

HSP90B1/ARF1/STEAP2/RHOBTB2/ITGAL/SNX3/CD5/CAV2/EGF/LMAN2/CAV1/CALM3/ARHGAP27/S

2B1/LGMN/HBEGF/ELMO2/NRTN/RBPJ/STXBP4/BTC/PSEN2/EPHA2/AP2A1/EREG/VASN/SERPINA12



CXCL10/CNR1/IFITM2/NFKBIL1/SKP2/JUNB/HNRNPA0/ATP2A2/TNFRSF1B/CD180/TLR8/MX1/CNF

CXCL10/CNR1/IFITM2/NFKBIL1/SKP2/JUNB/HNRNPA0/ATP2A2/TNFRSF1B/CD180/TLR8/MX1/CNF

NECTIN2/PABPN1/CLEC4E/RAB1A/ZCCHC3/PAF1/IKZF3/HNRNPUL1/CXCL10/CNR1/IFITM2/NFKB1  
P3/RPL11/ENC1/RPL10/KLHL25/HNRNPD/RPS24/MRPL3/PLA2G6/LSM14B/NEURL1/EIF4E2/ERAL1





B1/TSG101/TP53/IWS1/GRIPAP1/TARDBP/RASGRP1/CEP135/MAPKBP1/RAB11FIP1/HMGN3/SVIP/



















DR41/DHX9/TNP01/PSMC5/TIGAR/FAF1/PHKG2/CCAR2/RBM10/MEX3D/BECN1/WDR6/SEH1L/RBM24

ATRAID/BAG6/KIAA1324/BBS7/CST3/SNX5/SNRNP70/FEZ2/CNR1/METTL3/PIK3CB/HNRNPA0/PSM







AB1B/IER3IP1/TLR8/AP4B1/ABCA7/NCAM1/VAPA/TBC1D20/ST3GAL2

2/ACTR3/GAR1/CHEK2/RAD1/SFR1/CENPQ/LEMD2/BOD1/HAT1/CSNK2A1/DCTN1/USF1/MBD3/NBN/  
/PIH1D1/PNO1/ZPR1/PHF6/MORF4L2/KIF20B/RNF213/EWSR1/NUAK1/BAZ2A/POLR2I/UTP20/RPS

/TPP1/MANBA/GPC2/ATG9A/SPNS1/CTSW/BECN1/BRI3/HEXA/SNAPIN/AP2A1/IST1/VPS33A/SEH1  
L/KIF5B/TCHP/DYNC2LI1/CEP97/DYRK3/EYA3/ARL3/TTLL5/MAMLD1/JTB/MAPK15/HAUS2/PPP1R

TP11A/KLHL12/HTT/CAV2/PEF1/EGF/CAV1/RAB13/ATP7A/CALM3/CUZD1/CD3G/PTPRC/RAB1A/PL  
BD1/SUM03/SNAPC5/U2AF1L4/E2F7/KCTD13/LUC7L3/SRSF3/PLAGL1/NOLC1/SETD1A/MAU2/GEMI

GA/ADGRG3/EXOC3/SIGLEC9/RHOA/CD38/STXBP1/ACTN4/RAB27B/DOCK2/MANBA/COPB1/SPTAN1/  
M3/CUZD1/CD3G/PTPRC/RAB1A/PLD1/SNX5/SLC04C1/TMEM67/C2CD5/MYO1C/TNFRSF1B/RAB8B/S  
X/TEX11/HMGN2/ACTR5/RFC5/RNF8/GATAD2A/DHX9/SMARCA5/STAG3L4/RUNX3/DMAP1/CCAR2/PC  
30/COPB2/SLC35C2/FUT11/IFT20/CLTC/TAPBP/AP1S1/AP1S3/AP1S2/TJAP1/GOSR2/RAB27B/AC

/VPS33B/TLK2/ATP6V0A1/CCR2/FZD9/CHGA/CCDC78/HIF1AN/CDK5RAP2/VPS54/SERBP1/CUL7/S  
RAB9A/RAB40C/ATP11A/KLHL12/YIPF1/CAV2/PEF1/LMAN2/PI4K2A/CAV1/RAB13/ATP7A/MAP4K2

.OXL1/HSP90AA1/SGTA/CTNNA1/THBS1/NOTCH1/VPS45/SRGN/CD177/MAN2B1/DMBT1/OLFM4/CYB5

GPKOW/RPLP1/DHX9/FAM207A/EDC4/RBM28/BMS1/NOL10/RSL1D1/RPL32/RPL30/MRPL15/USP39/





B27B/AP2B1/LGMN/IFITM3/ATG9A/TMUB1/NIPA1/BECN1/PSEN2/TMEM184A/AP2A1/LRPAP1/VPS3  
N2/NAA50/ATG3/NAA20/PRPS1/DERL1/ERCC2/PIK3R2/KDM4A/KCTD13/CUL7/RNF19A/SLA2/ABTE



:/PRKCB/CNIH2/RPS18/KCNC3/PTPRS/ELAVL1/CHRNA5/KCNIP3/RNF19A/TMEM240/SYP/TSC1/PLE



L13A1/NEFH/FGL2/RPS15A/NEFL/NDUFA7/SNTA1/HIP1/DAG1/MRPS11/ANOS1/BFSP1/COL10A1/R  
ACSIN2/LIMA1/GLI1/LMTK2/RAB11A/CCDC88C/PHF6/EML2/RAB29/KIF20B/SSH3/CENPJ/PACSIN  
AB9A/MSH6/RAB40C/EP400/HSPA13/RAB13/ATP7A/SRCAP/ATP6V1B2/ATAD5/MORC2/ARL1/KIF26  
AB9A/MSH6/RAB40C/ENTPD1/EP400/HSPA13/RAB13/ATP7A/SRCAP/ATP6V1B2/ATAD5/MORC2/ARL  
AB9A/MSH6/RAB40C/ENTPD1/EP400/HSPA13/RAB13/ATP7A/SRCAP/ATP6V1B2/ATAD5/MORC2/ARL  
B2/ATAD5/MORC2/ARL1/KIF26B/DHX38/ERCC3/KLC1/VPS4A/RAB1A/RALBP1/RAB36/DDX52/DHX8  
/CCDC88A/SH3RF1/PLA2G6/PARK7/RHOH/CCNG2/KIF5B/CD4/HYAL2/JTB/PRKCSH/WDR45/RELA/C  
NOD2/SMAD3/RAC3/IKBKB/MAML1/MAP3K12/TP53/NEFH/BCL11A/FEZ1/SH2B1/PRKAR2A/MAPKAP1  
NP32E/TBC1D22B/ARHGEF11/RAB3A/CCNE2/SMAP1/PAK2/CSNK2B/ANXA3/LMTK2/PLEKHG6/PRDX5

G2/POLR3F/FICD/ULK1/MED20/POLR2B/UCL1/DYRK3/DGKD/PIK3C2B/BRD4/PIGF/EIF2AK1/TLK















./XRCC5/SMAD3/MYCN/MAU2/TFAP2C/SAFB/MACC1/AEBP1/TP53/SOX13/ELK1/BCL11A/TARDBP/TE

;/E2F6/TRIM71/HAUS6/NAE1/NDE1/ZWILCH/DRG1/CKAP2/KHDRBS1/CKAP5/DBF4B/BTN2A2/MEIS2  
9A6/FRMD6/STRIP2/EPHA10/YTHDF2/RAB1A/ARHGAP33/YTHDF1/ADNP/ADD1/FEZ2/METTTL3/GNA1  
.PPL2/TLR1/MUL1/TRIM56/NOD2/BTN3A2/BAP1/ARG2/XRCC5/SMAD3/CPTP/LILRB1/RNF135/AFAF  
J1/WNT5A/C5AR2/CD40/ARRB1/IL12A/GATA4/WNT3A/LSM14A/CACTIN/SLAMF1/PDCD1LG2/SOCS5

;/SLC04C1/FAF2

04C1/FAF2

PARG/JUNB/LOXL3/PSMB1/ACIN1/PRRC2C/MOV10/ASXL1/STK4/RPS6/NFKBID/PSMB6/CASP3/CHI  
IP8/MAPKAPK3/PSMB5/BAD/BCL10/PSMA4/SPPL3/HSP90AA1/ACVR1B/VCAM1/PSMD9/C12orf4/PTK

UBR5/BAZ2A/PPIE/POLR2I/TWIST1/STOML2/POLR2J/RBM14/APBB1/TEX11/PPHLN1/ACTR5/RFC5  
.2/PRMT7/ZBTB7B/BRD8/WDR70/TRIP12/HLTF/BRDT/MSL1/KMT2A/HMG20B/CPA4/JARID2/PCGF1/  
PP30/SUV39H1/LSM1/SFSWAP/POLR2E/SAFB2/PRKRA/PELP1/RPS9/CCAR1/WDR46/IMP4/KHSRP/S  
MRPL21/EIF3C/DDX1/EIF1/RPS15A/ATXN2/NDUFA7/AARS2/MRPS26/C1QBP/MRPS11/ZC3H15/RPL  
;/TMBIM1/SLC15A4/ANXA3/HLA-F/AP2A2/PCYOX1L/RAB11A/ATP6AP2/SLC2A3/TSPAN14/MLEC/PS  
O/MORC2/THOC1/DCLRE1C/PAGR1/FBXO6/ERCC3/CIB1/MMS22L/STUB1/BAG6/HUWE1/TRRAP/MET1

OR/ATAD5/CALM3/PAGR1/ERCC3/PKD1/CSNK2A2/BORA/ACTR1A/OFD1/ANAPC4/VPS4A/YTHDF2

ITM3/RPL32/TNP01/COPB1/RPL30/CRTC2/BECN1/SNAPIN/RBM15B/EPHA2/AP2A1/TBP/IST1/KPN  
:/GTF2F1/DHX38/RPS27/ERCC3/EXOSC2/PABPC1L/ZC3HAV1/DBR1/RPL29/GEMIN2/LARP1/PABPN1  
ID/CCR10/CIB1/IL17RB/PTPRC/YTHDF2/CRLF2/IP6K2/CXCL10/METTTL3/IFITM2/VRK2/PPARG/PI

.RL11/DMTN/PRMT6/DYRK3/CD4/HYAL2/IFNG/ANXA1/EIF2AK1/ARIH2/PSMB7/CCR2/KMT2B/FZD9/

;/FAF2/SNRNP70/TMEM67/DDB1/FBXO44/SKP2/PSMB1/WWTR1/SUM02/TNFRSF1B/PIN1/USP3/FBXC  
DPYSL4/KIF3A/FSTL4/NCKAP1/PLCG1/MOV10/PPP1R9A/LPAR1/CNP/NCAM1/UCN/TRIM32/VAPA/F

.P/BCOR/UBE2E3/CAND1/TRIM62/NUB1/MED20/RNF121/WWP2/ARIH2/RELA/RNF126/PSMB7/RNF11  
VPS11/CD38/YWHAG/ATG13/ABHD17A/CLTC/B9D1/SIX1/IL17RA/ANP32B/AP2B1/TNFRSF14/DHX9  
.C2/PEX10/NPHP4/RPS9/HAX1/EGF/ATR/ARL1/RPS14/CALM3/DZIP1/GET4/TAF3/RPS27/CSNK2A2  
I3/ADD3/UBTF/NDUFB3/CSNK2B/MIS18A/PSMG1/UBA52/PIH1D1/EML2/MECP2/TARBP2/RBMX/CENF  
IASE1/CNOT2/ADPGK/RPL12/RPS18/ENTPD4/RPS28/ELAVL1/FASTKD1/RPS17/NUDT3/PNPT1/SERE  
;/NSUN2/WDR43/GATC/DIS3L2/NSA2/RPRD2/CLP1/MRPS9/TSR2/INTS5/METTL8/DDX18/SAGE1/GE

/PAIP1/RRBP1/EIF2B3/RPL22/GEMIN5/MRPL21/EIF3C/DDX1/EIF1/RPS15A/ATXN2/NDUFA7/AAF

/HAX1/CAV1/LDB1/ATP7A/ATR/DAB2IP/PARP10/CAMSAP1/PREX1/DZIP1/EPHB2/ARFGEF1/ERCC3

S1/AP1S3/POLR2D/TAP2/AP1S2/RPL37A/AP2B1/RPLP1/DOCK2/TNFRSF14/DHX9/IFITM3/RPL32/  
.CR6/PPIE/POLR2I/PPIB/TLN1/RPS11/POLR2J/DAXX/RHOA/RPL13A/HMGN2/AP1S1/AP1S3/POLR2

'ANAPC15/PSMB7/CCNJ/PPP1R12A/CNOT2/SKP1/AKAP8

84/MAP4K2/DAB2IP/TRIM68/TMEM106A/ZNF683/ZC3HAV1/NECTIN2/YTHDF2/CLEC4E/SRPK2/ZCC

;/ZNF16/ADNP/ADD1/CNR1/PWP1/PPARG/JUNB/WWTR1/ACIN1/PLXNB2/TNFRSF1B/PIN1

.P07/SESN2/MAP3K9/NOD1/DUSP14/RGS4/MAP4K4/MAP3K11/CHMP6/PPP2R3C/ACE/MUL1/WNK1/TS

'NCOA6/SH3RF1/RTKN2/DPY30/PSMA3/ANKRD54/IRF4/RHOH/AGO1/MYC/BGLAP/ARL11/DMTN/PRMT

./CARMIL2/ACE/TRAK2/PLXNB3/LIG3/MUL1/TSC1/XRCC5/ANKRD13A/SLN/IKKBK/CPTP/LILRB1/T

.2B/UBE2N/ADCY5/KITLG/KSR1/EREG/CCL19/PIK3R6/IRAK2/GMFB/DUSP18/CACUL1/HTT/EGF/MA

;/CHMP6/SPICE1/TRAK2/ESYT1/SYP/MUL1/EXOC6/CADPS2/MYO1A/ACTR2/GEM/UNC13A/TTL/BICL

'A2/CAV1/CD84/CALM3/EPHB2/CIB1/CSNK2A2/ENY2/PARL/VPS4A/PLD1/HUWE1/TM9SF4/HDAC8/C

;/RAB1B/GLRB/VPS8/MX1/ABCA7/CNP/STAM/VAPA/CCDC88A/TBC1D20/ATP8B3/THEM4/NOX1/SYT1

F114/SNX3/KLHL12/PEF1/CAV1/UBAC1/NEDD8/PCGF3/TRIM68/PARP10/FBXO6/ENY2/FBXO41/S1  
'TCHP/DYNC2LI1/CEP97/RAB3IP/NPHP1/ARL3/CELSR3/TNNT2/WDR45/MAPK15/HAUS2/CNOT2/RPI

'N/CEP41/CCND3/PSMB5/PSMA4/BOD1/HSP90AA1/ACVR1B/PSMD9/DNM2/ADAM17/CDK2AP2/CCSAP/

















'P1R9A/LPAR1/STK4/MAP3K7/UCN/CASP3/CCDC88A/ADAR/COPS8/NAB2/TRIM27/MADD/NEURL1/AN

!;/RBM14/CD79B/SIGLEC9/NMI/CD38/RAPGEF1/STXBP1/MAP3K1/LGMN/TNFRSF14/DHX9/NR1H2/IL





FBXL18/TSG101/FBXL2/CDC16/KAT5/UBE2R2/RAD23A/SVIP/PPP1R11/DVL1/DERL3/CLEC16A/RN

.HL25/HNRNPD/RPS24/MRPL3/LSM14B/NEURL1/EIF4E2/ERAL1/PARK7/PYM1/EIF3F/RPS3A/EIF2E  
C16/MIB2/UBE2R2/SUZ12/PPP1R11/RNF214/KCTD9/RNF41/TICAM1/UBE2J1/ARRB1/PSMD12/BFA

.DAMTS7/ZFAND2B/USP13/UBE2K/PSME2

'UBE2N/KITLG/KSR1/EREG/CCL19/SEH1L/XCL1/MRAP2/NOTCH2/TLR7/SERPINA12/PIK3R6/CCL3I







.3R6/CCL3L3/SH3RF3/NPNT/IRAK2/CRLF1/OSM/CACUL1/CCL8/CAV2/HAX1/EGF/MAP4K1/CAV1/MA







/DUSP22/BORA/PTPRC/BMP2/ADCY3/PROM2/GDF10/ADNP/RYK/PIK3CB/NENF/PIN1/ADCY7/PPP1F

'CD22/CNPY3/MFHAS1/PLA2G6/ICAM2/PSMA3/PARK7/IRF4/HLA-C/PDE4B/POLR3F/EIF2B1/CTSL/

LC9A6/CD3G/PTPRC/SLC9A9/RAB1A/RALBP1/TM9SF4/SNX5/PROM2/ATP1B1/PPARG/PIK3CB/MY01

!./BMP8B/STRAP/POLR2E/ARID5B/NPNT/NEO1/CAV2/EGF/CAV1/DAB2IP/ATP6V1B2/GTF2F1/EPHB2



'/CASP3/CHD7/ABCF3/ADAR/FGF19/BCR

'/CASP3/CHD7/ABCF3/ADAR/FGF19/BCR

L1/SKP2/JUNB/HNRNPA0/ATP2A2/TNFRSF1B/CD180/TLR8/MX1/CNP/CASP3/CHD7/ABCF3/ADAR/F  
/PYM1/GART/EIF3F/RPS3A/EIF2B1/AURKAIP1/MRPL20/AGO1/ABCF1/RPL14/TMA7/PPA1/MRPL24





PPP1R11/PDX1/DERL3/NLRP3/UBE2J1/JAGN1/WNT5A/C5AR2/CD40/ARRB1/PPP3CB/ARHGAP44/PA



















./EIF6/EIF4G2/UBAC2/ATG7/SNX3/HTT/KHSRP/HAX1/EGF/CAV1/DAB2IP/RPTOR/ATP6V1B2/CRTC

IB1/SUMO2/TNFRSF1B/RAB1B/MOV10/MAP3K7/PSMB6/CASP3/VPS26A/GTPBP1/LRPPRC/RPL11/HNF







NOL6/CAPN2/HNRNPU/RNF2/ANP32E/RAD18/LLPH/SYCE1L/ERCC1/EXOSC9/EXOSC10/ADD3/CSNK2  
11/EXOSC1/RBM14/DAXX/SF3B3/RPL13A/SIX1/DHX15/ZNF300/TOE1/TGS1/PNMA3/WDR75/ANP32

L/VASN/TLR7/RAB9A/NAPG/ATP11A/HTT/EGF/PI4K2A/DPP7/DAGLB/RPTOR/ATP6V1B2  
12A/SKP1/LRIF1/CCDC78/WHRN/CDK5RAP2/CCDC8/TUBD1/CCDC96/MAP3K11/UBR4/CUL7/PPP2R3

D1/SNX5/SLC04C1/TMEM67/C2CD5/MYO1C/ATP2A2/TNFRSF1B/RAB8B/SPIRE2/CD59/VAPA/ATP8E  
N5/MAML1/CLK3/TP53/DDX1/TARDBP/TDP2/PIP5K1A/ASCC3/MTDH/TEPSIN/SUZ12/APEX1/PDX1/  
LY6K/CTSW/BRI3/HEXA/SNAPIN/TMEM184A  
PIRE2/CD59/VAPA/ATP8B3/GPR161/NCSTN/SLC30A5/SYT11/HLA-C/SNX24/MCTP2/RNF144A/SUF  
LE3/RPA1/PSEN2/PMF1/TBP/IST1/SEH1L/SMARCAL1/UXT/IP04/SUV39H1/MSH6/SAP130/PELP1/  
ER3/COG4/GPC2/ATG9A/COPB1/BECN1/PSEN2/SNAPIN/AP2A1/LRPAP1/COG2/TMEM167A/NOTCH2/

EC23B/DOCK6/SYP/TSC1/PLEKHG5/SHTN1/EXOC6/ANKRD13A/RAC3/USP33

/ARL1/B3GALT6/HS6ST2/CBY1/ARFGEF1/PKD1/LITAF/LMAN2L/CYTH3/HS2ST1/ST8SIA4/RAB1A/

R3/VDAC2/VEGFA/GNAI3/GLIPR1/RAB3A/HEXB/ACTN1/CYB5R1/PLA2G1B/TLR2/CSNK2B/COPS5/T

SNRNP25/C12orf65/MRPL4/EBNA1BP2/LUC7L/RBM24/EIF6/UTP23/SF3B2/CNOT3/RPP30/LSM1/S





3A/TLR7/ARF1/STEAP2/BET1L/RAB9A/IRAK2/PDIA3/ATP11A/SNX3/YIPF1/HTT/SAMD9L/PI4K2A  
1/USP33/SETD1A/IKBKB/SUPT3H/FBXL18/ZNRD1/TP53/TBPL1/PHF20/SPTLC2/TAF11/FBXL2/CI



XHG5/CADPS2/SORCS2/ACTR2/RPL22/UNC13A/COL13A1/GRIPAP1/ELK1/NEFH/BCL11A/APH1A/CI



PL31

I1/KIF22/CDK5R1/ARL8B/TNNC1/TLN1/WIPF2/APBB1/CACNA1D/DSTN/PLEKHH2/RHOA/NEK6

IB/DHX38/ERCC3/KLC1/VPS4A/RAB1A/RALBP1/RAB36/DDX52/DHX8/DHX30/ATP1B1/GNA13/MYO1C  
.1/KIF26B/DHX38/ERCC3/KLC1/VPS4A/RAB1A/RALBP1/RAB36/DDX52/DHX8/DHX30/ATP1B1/GNA1  
.1/KIF26B/DHX38/ERCC3/KLC1/VPS4A/RAB1A/RALBP1/RAB36/DDX52/DHX8/DHX30/ATP1B1/GNA1  
:/DHX30/ATP1B1/GNA13/MYO1C/AK6/ATP2A2/ACIN1/RAB8B/PIN1/KIF3A/RAB1B/MOV10/MX1/ABC  
CNJ/PRAM1/PPP1R12A/NELL2/PRKCB/CDK5RAP2/PPP1CB/RHOD/ELAVL1/PIK3R2/MAP3K11/RPS6K  
/SMCR8/C1QBP/DVL1/PARN/MARVELD3/LRP4/RNF41/TICAM1/ARRB1/PARD6A/TPR/GATA4/NFATC1

i/DGKQ/PPP2R5B/CDC37/CDK5R1/ARHGAP28/ADPRH/PRKAR1B/AGAP3/RUNDC3A/DAXX/STK3/GLMN/

.2/MAPK15/FN3KRP/TERF1/CCNJ/TRIO/CLK2/POLR1C/ADPGK/POLR3A/MAP3K9/PRKCB/MAP4K4/PF















PL1/STAT4/KDM3B/ETV3/SUZ12/APEX1/PDX1/SETMAR/ZBP1/NACC2/MEN1/SP1/ZNF516/ZNF704/

2/MZT1/ANKLE2/RAD51C/BTG2/PSMD8/ACVR1/TAF10/PIDD1/DNA2/HSPA2/PKIA/ABL1/EMD/TBCD/  
.3/RYK/PIK3CB/ANTXR1/PLXNB2/DPYSL4/SCARA3/KIF3A/FSTL4/ARHGEF18/NCKAP1/PLCG1/MOV1  
1L2/CD80/DDX1/RASGRP1/LILRB2/MAPKBP1/NRROS/KAT5/C1QBP/RFTN1/PPP1R11/OTUD5/ZBP1/  
i/CD274/STAT3/PCBP2

7/ADAR/CLPTM1/SMAD5/BCR/ICOS/MFHAS1/NCOA6/SH3RF1/RTKN2/DPY30/PSMA3/ANKRD54/IRF4

2/PTPN2/THBS1/ADAM17/CASP8/PDCD2/RPS27A/CD177/HOXA5/MAVS/DMBT1/VEGFA/SMAP1/PLA2

5/RNF8/POLR2D/GATAD2A/GPS1/HINFP/DNMT3B/DHX9/MAPKAPK5/DNAJC2/GTF2H1/DMAP1/TIGAR

'SMCHD1/BRCC3/GTF3C4/PHC1

POUT1/MFAP1/TRMT2B/RBFA/PRPF4/THOC1/RPS14/GTF2F1/DHX38/RPS27/ERCC3/EXOSC2/PABPC  
.31/MRPL42/TRMT10C/TPR/PASK/LSM14A/MRPL22/NOA1/MRPL58/METTL16/EIF4ENIF1/ZC3H12D/  
MC3/PPIE/TRPV6/TLN1/AGA/PRSS12/ADGRG3/EXOC3/CACNA1D/SIGLEC9

L3/DDB1/TFPT/EXO5/TNFRSF1B/TFIP11/SPIRE2/USP3/POLG2/TRIM32/CASP3/COPS8/NCOA6/TC

IA6/CTBP1/SEH1L/CD247/SF3B2/NELFA/ARF1/SUV39H1/POLR2E/MSH6/PRKRA/ATG7/RPS9/SNX3/  
./YTHDF2/SRSF1/SRSF2/SRPK2/PAF1/HNRNPUL1/CASC3/SNRNP70/COIL/FIP1L1/RBM4B/DHX8/RI

K3CB/JUNB/CCR3/P4HB/PSMB1/TNFRSF1B/MX1/IL32/NCAM1/MAP3K7/TRIM32/PSMB6/CASP3/ADP

'DOCK11/CD19/POU2F2/GON4L/PRKCB/ERCC2/PPP2R3C/ACE/ZBTB24/ESRRA/TSC1/XRCC5/SLC7A6

10/TRIM32/PSMB6/RPL11/ENC1/CDC23/KLHL25/MVB12B/RNF149/PSMA3/PARK7/BUB3/RNF144A

RPL24/CASP3/CCDC88A

.5/SKP1/ANKIB1/MED30/MKRN1/ATG3/SUMO3/RNF186/DERL1/KCTD13/SEN5/UBR4/CUL7/RNF19/  
)/GPC2/RSL1D1/DMAPI1/STXBP4/EPHA2/ADCY5/CORO2B/CCL19/DPH3/MRAP2/CD247/ARF1/TFDP1/  
2/NUDT19/PARL/RPL29/TIMM23/VPS4A/BAG6/TIMM8B/HUWE1/PAF1/PITRM1/SRP68/HDAC8/TRAM1  
'J/DGKQ/CDK5R1/ZRSR2/ARHGAP28/PSMC3/BAZ2A/TIMMDC1/NDUFA13/EIF3E/DAXX/NSUN4/RHOA/  
3P1/JMJD8/NUP214/PPP2CA/TNFSF13/PAIP1/RPL22/ERI1/PDE5A/TP53/LSM3/TARDBP/RPS15A/5  
MIN4/NCBP1/TSEN2/TRPT1

IS2/MRPS26/C1QBP/MRPS11/ZC3H15/RPL31/MRPL42/TRMT10C/TPR/PASK/LSM14A/MRPL22/NOA1/

3/DUSP22/STUB1/SACS/VPS4A/PLD1/KIAA1324/VPS16/EVI5L/BIK/ADNP/ADD1/FEZ2/ASAP3/DDF

'TNP01/COPB1/RPL30/SLC22A5/CRTC2/BECN1/SNAPIN/RBM15B/EPHA2/AP2A1/TBP/IST1/KPNA6/  
ID/TAP2/AP1S2/RPL37A/AP2B1/RPLP1/DOCK2/TNFRSF14/DHX9/IFITM3/RPL32/TNP01/COPB1/RI

HC3/IP6K2/METTL3/IFITM2/PPARG/NFKBIL1/SKP2/MYO1C/PSMB1/SCARA3/CD180/TLR8/MX1/NC

IC1/NOD2/PPP2CA/XRCC5/CARD14/RASSF2/MAP3K12/PDE5A/AFAP1L2/TSG101/STRADA/RASGRP1/

'6/DYRK3/CD4/HYAL2/IFNG/ANXA1/EIF2AK1/ARIH2/FOXL1/PSMB7/CCR2/KMT2B/FZD9/DOCK11/C

'P53/BCL11A/LILRB2/FEZ1/ATXN2/ARPIN/CHMP4A/PSMG2/SMCR8/SVIP/CLEC16A/LRP4/SETMAR/

IP4K1/CAV1/LDB1/MAP4K2/DAB2IP/HMGA2/RPTOR/CALM3/EPHB2/CIB1/PKD1/DUSP22/BORA/PTPF

02/RAB6A/GRIPAP1/NEFH/RASGRP1/FEZ1/CEP135/NEFL/MYH9/CHMP4A/TFEB

'XCL10/C2CD5/CNR1/CEP72/MYO1C/ATP2A2/PIN1/PLCG1/PPP1R9A/CASK/KCNMB4/YIPF5/ABCA7/

.1/TMCC1/TIMM9/TIMM22/IGF2R/TSNARE1/RFT1/NMT1/VAMP3/KIF5B/CD4/ARHGAP25/HYAL2/AN



UB1/ANAPC4/TADA3/RAB1A/HUWE1/PAF1/RRAP/HDAC8/OTUD3/DDB1/FBXO44/SKP2/TFPT/PSMB1  
.12/MRPS2/IQCG/CCDC78/ATG3/CDK5RAP2/RPS28/PTPRS/KIF9/RAB7A/CHMP6/SPICE1/HDAC3/P1

DCTN1/CCNJL/CEP164/HAUS7/NBN/FBXW5/PLK3/HNRNPU/ZFYVE19/OPTN/CCNE2/HAUS5/MASTL/I

















IKRD54/PARK7/RHOH/PDE6G/CCNG2/SLC27A1/MLLT1/CD4/HYAL2/JTB/IFNG/CCNJ/IP07/ZNF622/

IO1/ELM02/PSMC5/ADORA2B/UBE2N/EREG/CCL19/FAM3A/XCL1/CD247/TLR7/HSP90B1/PIK3R6/IF



IF41/UBE2J1/LRP2/ARRB1/PSMD12/BFAR/ARMC8/SMURF2/RNF40/OGT/MAPK9/CDC26/SOCS5/USP4

31/AURKAIP1/MRPL20/AGO1/ABCF1/RPL14/TMA7/PPA1/MRPL24/MRPS16/EIF5B/RPL10A/FXR1/IF  
1R/SMURF2/RNF40/PHF23/OGT/ASB2/MAPK9/LZTR1/CDC26/SOCS5/WDR70/TRIP12/TRIM44/HLTF/

.3/SH3RF3/NPNT/PRKRA/IRAK2/CRLF1/OSM/HTT/CCL8/CAV2/HAX1/EGF/MAP4K1/CAV1/ATR/MAP4







IP4K2/DAB2IP/HMGA2/RPTOR/CALM3/CIB1/TMEM106A/PKD1/DUSP22/BORA/PTPRC/BMP2/ADCY3/







9A/LPAR1/ABCA7/STK4/MAP3K7/UCN/CCDC88A/FGF19/MFHAS1/COPS8/NAB2/SH3RF1/PLA2G6/PI

'CD4/IFNG/CTSB/ANXA1/RELA/AIM2/PSMB7/CCR2/KLHL6/PRAM1/SKP1/HLA-E/EIF2B2/NOD1/CD1

.C/LOXL3/ATP9A/SCARA3/SSC4D/NCKAP1/PLCG1/CSNK1G1

2/SLC9A6/DUSP22/CNKSRI/EPHA10/STUB1/BMP2/SNX5/GDF10/C2CD5/RVK/PIK3CB/MY01C/BDKRE







GF19/BCR

l/MRPS16/EIF5B/RPL10A/FXR1/MRPL55/EIF2AK1/SYNCRIP/CHCHD1/EIF4G1/CNOT2/RPL12/EIF2



RD6A



















3/PGAM1/PKD1/EXOSC2/CSNK2A2/ZC3HAV1/STUB1/LARP1/YTHDF2/ATRAID/BAG6/KIAA1324/BB

RNPD/PIP4K2B/PSMA3/AAAS/PARK7/DCP2/HNRNPC/RNF144A/USP36/NUB1/UBQLN2/ULK1/PAM16/I









2B/COPS5/MIS18A/PHF6/THOC2/MECP2/RBMX/KIF22/INTS7/BAZ2A/USP11/NCAPD3/EIF3E/SRF/I  
2B/TSEN34/DHX9/FAM207A/SMARCA5/RBM28/BMS1/NOL10/RUNX3/RSL1D1/RNMT/ZNF415/TMUB1/1

3C/RNF19A/SPICE1/USP33/IFT140/BICD2/CEP95/TSG101/CNTROB/FEZ1/CEP135/CDC16/RAB28/

33/GPR161/NCSTN/SLC30A5/SYT11/HLA-C/SNX24/MCTP2/RNF144A/SURF4/IGF2R/VAMP3/RAB22A/

7BAZ1B/TMEM179B/NACC2/SRSF10/ARRB1/MAML2/NUFIP2/SMURF2/SRSF7/GATA4/NFATC1/PRPF4C

IF4/IGF2R/VAMP3/RAB22A/RAB3C/MOSPD2/SPARC/DGAT1/CD4/ANXA1/CD207/ATP6V0A1/VAMP1/F  
7SMC2/MORF4L1/POLE2/EP400/LDB1/ATR/TP53BP1/SPOUT1/SRCAP/HMGA2/ATAD5/MORC2/THOC1/  
7TLR7/TMEM167B/ARF1/STEAP2/BET1L/COPA/RAB9A/RAB40C/ATP11A/KLHL12/YIPF1/CAV2/PEF1

7PLD1/PLEKHA8/RAB36/GCNT1/KIAA1324/B3GNT8/CHAC1/ERGIC2/RHBDD2/ATP9A/QSOX2/ACBD3/

7MBIM1/SLC17A5/SLC15A4/ANXA3/BCL2L1/AP2A2/PCYOX1L/ATP6AP2/SLC2A3/TSPAN14/MLEC/PS

5URF6/RPS9/WDR46/SND1/IMP4/KHSRP/HAX1/EIF3G/MFAP1/RPTOR/PRPF4/RPS14/MIR155HG/ARF



l/CAV1/RAB13/ATP7A/SLC9A6/LITAF/RPS6KC1/VPS4A/SLC9A9/RAB1A/PLD1/TM9SF4/KIAA1324/  
C16/GTF2E1/PIGQ/PRKAR2A/MIB2/KAT5/SMCR8/SUZ12/MSL3/DERL3/TAF4/POLD2/MEN1/ARMC8/



H9/NEFL



3/AK6/ATP2A2/ACIN1/RAB8B/PIN1/KIF3A/RAB1B/MOV10/MX1/ABCA7/GPN1/CHD7/ABCF3/GTPBP1  
.3/MYO1C/AK6/ATP2A2/ACIN1/RAB8B/PIN1/KIF3A/RAB1B/MOV10/MX1/ABCA7/GPN1/CHD7/ABCF3  
.3/MYO1C/AK6/ATP2A2/ACIN1/RAB8B/PIN1/KIF3A/RAB1B/MOV10/MX1/ABCA7/GPN1/CHD7/ABCF3  
A7/GPN1/CHD7/ABCF3/GTPBP1/ATP2C1/DDX31/SNRNP200/DDX20/ATP2B1/RHOH/MYO1D/KIF5B/M  
A3/PTPN14/ACE/WNK1/NOD2/SMAD3/MYCN/RAC3/IKBKB/MAML1/MAP3K12/TP53/STRADA/NEFH/BC  
./NISCH/MAPRE2/ROR2/EXOC2/TAOK2/SOCS5/TAB1

'GSKIP/YWHAG/ATG13/ATP2B4/PRKAG1/PIK3R5/GPS1/ACAP3/STXBP5/SOCS7/RPLP1/DOCK2/FAF1

RPS1/ERCC2/FASTKD1/MAP3K11/RPS6KA3/PNPT1















'PUB/GATA4/NFATC1/MAFK/LSM14A/ZBTB7B/NFXL1/PRDM1/HOXC10/RBMS1/STOX1/TGIF1/HLTF/

‘VCP/PSMA1/PIM3/MTA3/NSFL1C/DCLRE1B/EME2/CHEK2/CLSPN/CEP41/CCND3/PSMB5/TTYH1/PSM  
LO/PPP1R9A/ASXL1/LPAR1/STK4/CNP/NCAM1/PXN/RPL24/CASP3/TBC1D20  
‘NLRP3/TICAM1/UBE2J1/WNT5A/C5AR2/CD40/ARRB1/CLECL1/IL12A/GATA4/NFATC1/WNT3A/LSM1

4/RHOH/UNG/AGO1/MYC/BGLAP/ARL11/DMTN/PRMT6/DYRK3/CD4/HYAL2/IFNG/ANXA1/EIF2AK1/AI  
2G1B/PAK2/TLR2/TMEM64/MUC6/UBA52/HLA-F/RAB29/MUC15/CACNB3/NKAP/PLD2/PSMC3/UBE2D2

‘FAF1/POLE3/RPA1/UBE2N/EREG/MMS19/CDC34/SMARCAL1/MUS81/TFDP1/POLR2E/SMUG1/MSH6/(

21L/DBR1/GEMIN2/PABPN1/SRSF1/CDK5RAP1/SRSF2/SRPK2/PAF1/DDX52/HNRNPUL1/CASC3/SNRN  
‘MRPL38/MRPS30/GSPT1/AIMP1/STAT3/MRPS27

2EA1/PHF1/MGME1/PARK7/UNG/ING2/SHISA5/MYC/SLFN11/AP5S1/HUS1/POLR2B/PRMT6/FIGNL1/

‘SND1/CCL8/CAV2/CAV1/EIF3G/SUPT4H1/SRCAP/HMGA2/RPTOR/PARP10/MORC2/NELFCD/RPS14/(  
2L13/RBM8A/METTL3/CSTF3/SF3B6/MAGOHB/SNRPD3/PRPF38B/HNRNPA0/PSMB1/ZNF473/ACIN1/1

AR

3OS/RPL22/SETD1A/RASSF2/LILRB1/FUT7/GNAS/CD80/TP53/SOX13/PLD4/RASGRP1/FGL2/LILRI

‘SDF2/USP36/NUB1/UBQLN2/RNF121/CTSL/WWP2/HTRA2/IFNG/CTSB/ARIH2/RELA/RNF126/TLK2/



1/NUP214/MUL1/TRIM56/NOD2/HDAC3/TULP4/RNF10/RNF135/FBXL18/TSG101/BCL11A/FBXL2/CI  
UBAC2/RAB9A/OSM/SNX3/HAX1/EGF/FRMD4A/DNAJC1/ENSA/EPHB2/CIB1/IL17RB/PANX2/CSNK2/  
L/RPL13/SNX16/CEP72/RAB8B/PIN1/SUPT7L/RPL4/RPL41/ABCA7/IK/RPL9/RPS6/TNPO3/VAPA/I  
RPL13A/VPS11/CLTC/STXBP1/TAPBP/COA1/POLR2D/SART3/TGS1/MTERF3/MRPL11/ANP32B/AP2I  
MG8

MRPL58/METTL16/EIF4ENIF1/ZC3H12D/MRPL38/MRPS30/GSPT1/AIMP1/STAT3/MRPS27

31/MYO1C/ANTXR1/TFIP11/SPIRE2/RAB1B/NCKAP1/PPP1R9A/LPAR1/ADGRL1/PXN/STAM/PLEKHM1  
CTBP1/SEH1L/CD247/SF3B2/NELFA/ARF1/SUV39H1/POLR2E/RAB9A/MSH6/PRKRA/ATG7/RPS9/SI  
L30/SLC22A5/CRTC2/BECN1/SNAPIN/RBM15B/EPHA2/AP2A1/TBP/IST1/KPNA6/CTBP1/SEH1L/CI

AM1/MAP3K7/TRIM32/PSMB6/ADAR/FFAR2/CNPY3/MFHAS1/TRIM27/CAPZA2/ICAM2/PSMA3/IRF4,

TNFRSF10A/SMG8/PRKAR2A/MAPKAP1/SMCR8/DUSP26/DAG1

D19/POU2F2/GON4L/PRKCB/ERCC2/ZMPSTE24/PPP2R3C/ACE/ZBTB24/ESRRA/TSC1/XRCC5/SLC7/

RNF41/TAOK1/SLX4

3C/STUB1/BMP2/PABPN1/ADCY3/RAB1A/CDK5RAP1/ZNF16/CXCL10/ADNP/PPARG/PIK3CB/WWTR1/I

KCNC4/TMEM38A/CCDC88A/CHD7/TBC1D20/EFCAB7/MFHAS1/EPB41/PLA2G6/RBM22/SYT11/AAAS,  
A1/VPS33B/MAPK15/VAMP1/NKD2/TFG/FZD9/PRKCB/CNIH2/RAB7A/CNEP1R1/ZMPSTE24/VAV3/CI

l/WWTR1/SUMO2/PIN1/ASXL1/WDSUB1/USP3/FBXO10/KCMF1/MAP3K7/TRIM32/STAM/PSMB6/BTBD1  
PDC1/SMC1A/ACTR2/IFT140/TSG101/CNTROB/LSM3/TBPL1/FEZ1/CEP135/TMEM80/ATXN2/CHMP4

.ZTS1/BCL2L1/DYNC1I2/RAB11A/ZPR1/GPR132/CRLF3/NEDD1/KIF20B/MECP2/CENPJ/MITD1/KIF

















/SESN2/MAP3K9/NOD1/CD19/DUSP14/RGS4/MAP4K4/PIK3R2/MAP3K11/VAV3/CHMP6/PPP2R3C/ACI

AK2/ITGAL/SERPINB9/IL13RA2/CAV1/TP53BP1/CLEC2B/CD84/DAB2IP/ATAD5/THOC1/INPP5D/I



I6/TRIP12/KLHL22/ANAPC1/PCBP2/DNAJC18/CCDC115/UBXN2A/DACT1/ADAMTS7/ZFAND2B/USP15

ING/MRPL55/EIF2AK1/SYNCRIP/CHCHD1/EIF4G1/CNOT2/CTNS/RPL12/EIF2B2/MRPS2/SESN2/RPS  
'KLHL22/ANAPC1/UBXN2A/ASB16/PCGF1/UBE2K/PSME2/PHC1/FANCL/TRIM5/TRIM3/TRIM36/ZC3H

IK2/DAB2IP/RPTOR/CALM3/ARFGEF1/CIB1/TMEM106A/DUSP22









7NF16/PROM2/GDF10/ADNP/RYK/PIK3CB/NENF/PIN1/ADCY7/PPP1R9A/LPAR1/ABCA7/STK4/MAP3K





.A2G2A/MADD/NOX1/NEURL1

19/TRIM15/PRKCB/NLRC4/BPIFB1/PTPRS/PIK3R2/CLEC4A/VAV3/APPL2/RPS6KA3/SLA2/TLR1/S1











2B2/MRPS2/SESN2/RPS18/RPS28/ELAVL1/GGT6/RPS17/RPS6KA3/NOLC1/ABTB1/RPL26L1/TSC1/!























37/CST3/SNX5/SNRNP70/FEZ2/CNR1/METTL3/DDB1/PIK3CB/HNRNPA0/PSMB1/SUMO2/TNFRSF1B/I

3XR1/HTRA2/IFNG/ARIH2/SYNCRIP/TLK2/MAPK15/ATP6VOA1/EIF4G1/PSMB7/NKD2/TBC1D25/ANI









YAXX/TEX11/PPHLN1/HMG2/ACTR5/RFC5/RNF8/GATAD2A/DHX9/SMARCA5/STAG3L4/RUNX3/DMP1  
JIN/RBPJ/SPATA24/DDX55/MTX2/TAF13/UBE2N/DIMT1/EBNA1BP2/DEDD/TSEN15/NOL9/EIF6/UTI

PRKAR2A/HARBI1/RILPL2/MACROD2/RAD23A/HYLS1/APEX1/PATJ/ATP6V1D/GNAI2/ACTR8/SCYL1

V/RAB3C/MOSPD2/SPARC/DGAT1/CD4/ANXA1/CD207/ATP6V0A1/VAMP1/PDE6D/ARCN1/HLA-E/CHG/

JB/CACTIN/RSRC1/EIF4ENIF1/BCAS2/HOXC10/CRTC1/TAB1/DDX46/TRIP12/DUSP11/FOX2/THAI

PDE6D/ARCN1/HLA-E/CHGA/SAYSD1/ARL8A/DNAJC13/SEMA4C/CNIH2/MMP25/PTPRS/RAB7A/UBR4,  
DCLRE1C/CSNK2A2/MMS22L/SIN3B/LIN37/PAF1/TRRAP/DDB1/JUNB/TFPT/TRPS1/TFIP11/ASXL1  
L/LMAN2/PI4K2A/CAV1/RAB13/ATP7A/MAP4K2/ARL1/B3GALT6/HS6ST2/CBY1/ARFGEF1/PKD1/LIT

SCARA3/CD59/RAB1B/IER3IP1/TLR8/AP4B1/ABCA7/NCAM1/VAPA/TBC1D20/ST3GAL2

MC3/PPIE/PLA1A/AGA/ADGRG3/EXOC3/SIGLEC9/RHOA/CD38/STXBP1/ACTN4/STXBP5/RAB27B/DC

GEF1/DHX38/RPS27/MRPS24/PABPC1L/RPL29/EIF2D/GEMIN2/MRPL33/LARP1/PABPN1/YTHDF2/5



/SNX5/SDF4/VPS16/CD1A/SNX16/BDKRB2/ANTXR1/ATP9A/RAB8B/NIPA2/VPS8/TLR8/AP4B1/LPAI  
'SMURF2/TAF2/RNF40/NAA11/EZH1/OGT/KANSL2/SPTSSA/DPM1/ASB2/LZTR1/CDC26/BRD8/SOCS:







1/ATP2C1/DDX31/SNRNP200/DDX20/ATP2B1/DCP2/RHOH/MYO1D/KIF5B/MYO18B/RAB22A/SLFN11/  
3/GTPBP1/ATP2C1/DDX31/SNRNP200/DDX20/ATP2B1/DCP2/RHOH/MYO1D/KIF5B/MYO18B/RAB22A/  
3/GTPBP1/ATP2C1/DDX31/SNRNP200/DDX20/ATP2B1/DCP2/RHOH/MYO1D/KIF5B/MYO18B/RAB22A/  
MYO18B/RAB22A/SLFN11/ABCF1/RAB3C/DDX51/DYNC2LI1/FIGNL1/ARL3/TNNT2/EIF5B  
2L11A/FEZ1/PIP5K1A/SH2B1/PRKAR2A/MAPKAP1/SMCR8/C1QBP/RAD23A/DVL1/PARN/MARVELD3

1/CCAR2/SH3BP5L/PPP1R7/SERPINB8/SGSM1/GCLM/SERPINA12/ARF1/PIK3R6/RANBP3/AUP1/PRI

















'STAT3/DLX6/PSIP1/FOXC2/KMT2A/JARID2/XRN2/ZW10/TFCP2/HOXC6/MYB/MZF1/SREBF2/ZBTB4



AA4/BOD1/HSP90AA1/ACVR1B/PSMD9/DNM2/ADAM17/CDK2AP2/CCSAP/DCTN1/CCNJL/CEP164/HAU5  
L4A/ZBTB7B/CACTIN/SLAMF1/PDCD1LG2/SOCS5/CD274

RIH2/FOXL1/PSMB7/CCR2/HLA-E/KMT2B/FZD9/SUPT6H/DOCK11/CD19/POU2F2/GON4L/PRKCB/ERK  
2/STOML2/WIPF2/RBM14/CD79B/RHOA/CD38/AP3B1/RAPGEF1/STXBP1/MAP3K1/LGMN/TNFRSF14/IRF  
3LRX2/ATG7/MORF4L1/RNASEH1/POLE2/ATR/TP53BP1/HMGA2/ATAD5/PARP10/MORC2/GRWD1/THO1  
NP70/COIL/FIP1L1/RBM4B/DHX8/RBM8A/METTL3/CSTF3/TEX10/SF3B6/MAGOHB/SNRPD3/PRPF38I  
/DYRK3/EYA3/BRD4/HTRA2/ASF1A/TLK2/MAPK15/CNOT2/SESN2/ERCC2/E2F7/ZMPSTE24/VAV3/PI

3TF2F1/CRTC3/RPS27/ERCC3/ZC3HAV1/RPL29/EIF2D/KLC1/LARP1/VPS4A/NECTIN2/PABPN1/RAI  
IFIP11/MOV10/RPL4/CELF2/RPL41/IK/SMG7/RPL9/RPS6/RPRD1A/PPP1R8/RPL24/PSMB6/ADAR/C

/ANAPC15/PSMB7/NKD2/RNF115/SKP1/ANKIB1/ADAMTS12/RNF186/DERL1/RAB7A/KCTD13/ZMPSTI

OC16/MIB2/UBE2R2/SUZ12/PPP1R11/RNF214/KCTD9/RNF41/TICAM1/UBE2J1/ARRB1/PSMD12/BF1  
A2/BORA/ENY2/PARL/VPS4A/CLEC4E/CRLF2/HUWE1/TM9SF4  
RPL24/CCDC88A/EFCAB7/RPL11/RPL10/MFHAS1/RPS24/RBM22/KPNA4/SYT11/C2CD3/PARK7/BUB  
31/DHX9/COG4/SMARCA5/COA3/GTF2H1/MTPN/NDUFS8/NIN/SPTAN1/HCCS/PSMC5/POLE3/RPA1/U

l/CCDC88A/RIOK1/TRIM27/PIP4K2B/PLA2G6/CAPZA2/NEURL1/SYT11/PARK7/USP36/CAND1/UBQI  
X3/SND1/SERPINB9/CCL8/CAV2/CAV1/EIF3G/SUPT4H1/SRCAP/HMGA2/RPTOR/PARP10/MORC2/TI  
247/SF3B2/NELFA/ARF1/SUV39H1/POLR2E/RAB9A/MSH6/PRKRA/ATG7/RPS9/SNX3/SND1/SERP

/HLA-C/POLR3F/VAMP3/KIF5B/TRIM62/NUB1/CTSL/KRT16/APOBEC3F/IFNG/CTSB/ANXA1/SYNCR

A6OS/RPL22/SETD1A/RASSF2/LILRB1/FUT7/GNAS/CD80/TP53/SOX13/PLD4/RASGRP1/FGL2/LILI

PIN1/ADCY7/PPP1R9A/LPAR1/STK4/MAP3K7/UCN/CASP3/CCDC88A/ADAR/RPL11/COPS8/NAB2/HNI

/PARK7/MCTP2/C2CD2L/USP36/NMT1/KIF5B/ADGRE2/DMTN/CD4/HYAL2/HTRA2/IFNG/ARIH2/TRI  
IMP6/APPL2/SEC23B/SYP/MUL1/PPP2CA/EPN1/RAC3/ACTR2/CPTP/GBA2/GNPAT/FNBP1/TP53/GR

1/RPL11/ENC1/NXN/CDC23/KLHL25/COPS8/TRIM27/SH3RF1/NEURL1/RNF149/PSMA3/AAAS/PARK  
1A/SMCR8/RILPL2/C1QBP/HYLS1/MRPS11/ATP6V1D/MTA1/HAUS3/KIF24/GAS8/TPR/PHF23/LSM1

22/PSMC3/NCAPD3/CHFR/TPD52L1/RHOA/NEK6/YWHAG/CLTC/PPAT/HINFP/PSMC5/CNOT10/POLE

















3/SLA2/MUL1/WNK1/TSC1/NOD2/PPP2CA/XRCC5/CARD14/RASSF2/MAP3K12/PDE5A/AFAP1L2/TSG.

0USP22/ZNF683/CD3G/PTPRC/NECTIN2/YTHDF2/CLEC4E/BAG6/ZCCHC3/SIGLEC7/BTN2A1/CNR1/1



3/UBE2K/PSME2

518/RPS28/ELAVL1/GGT6/RPS17/RPS6KA3/NOLC1/ACE/ABTB1/RPL26L1/TSC1/PAIP1/RRBP1/EI1  
IC1/MED31/HACE1/RAB40B/UBE2V2/G2E3/HSPA1A/RMND5B/NSMCE1/KLHL36/PSMD6/MALT1/PCNP,









κ7/UCN/CCDC88A/FGF19/MFHAS1/COPS8/NAB2/SH3RF1/PLA2G6/PLA2G2A/MADD/NOX1/NEURL1







100A1/WNK1/NOD2/BTN3A2/TNFSF13/XRCC5











ARG2/PAIP1/RRBP1/EIF2B3/RPL22/PDPR/GEMIN5/MRPL21/EIF3C/DDX1/EIF1/RPS15A/SPTLC2/1























PIIN1/RAB1B/MOV10/MAP3K7/TRIM32/PSMB6/CASP3/VPS26A/GTPBP1/LRPPRC/RPL11/HNRNPD/PII

IB1/SESN2/NOD1/PPP1CB/ELAVL1/PIK3R2/TYSND1/KDM4A/FASTKD1/ZMPSTE24/PNPT1/SERBP1,









L/CCAR2/POLE3/RPA1/PSEN2/PPP1R7/PMF1/TBP/IST1/SEH1L/SMARCAL1/CDYL/UCT/ IPO4/SUV39  
23/MUS81/RPP30/POLR2E/SMUG1/PDK3/SPATA2/SURF6/PELP1/SMC2/RPS9/WDR46/IMP4/TRIM68

L/PARD6A/HAUS3/DDHD2/KIF24/GAS8/LRRCC1/MAPRE2/SPPL2B/DZIP1L/BCAS2/IFT81/STOX1/PC

A/SAYSD1/ARL8A/DNAJC13/SEMA4C/CNIH2/MMP25/PTPRS/RAB7A/UBR4/APPL2/MCEMP1/SEC23B/

27/HMG20B/SMU1/MDC1/PRPF40A/FNBP4/AKAP17A/ANKRD2/SYF2/RBM15/FANCL/DAZAP2/HACE1/1

/APPL2/MCEMP1/SEC23B/TLR1/SYP/MPEG1/CD163

L/USP3/THOC7/TTI1/PHF1/PARK7/IRF4/BUB3/HNRNPC/LRWD1/ING2/THOC3/MYC/SLFN11/YY1AP1  
TAF/LMAN2L/CYTH3/HS2ST1/ST8SIA4/RAB1A/PLD1/PLEKHA8/RAB36/GCNT1/KIAA1324/B3GNT8/

OCK2/MANBA/ATG9A/COPB1/SPTAN1/LY6K/CTSW/BRI3/HEXA/DPYSL3/PSEN2/SNAPIN/TMEM184A

SRSF1/SRSF2/MRPS5/SRP68/CASC3/SNRNP70/DHX8/DHX30/RPL13/RBM8A/SF3B6/MAGOHB/SNRPD



31/ABCA7/MAP3K7/KREMEN2/STAM/PLEKHM1/VPS26A/CD22/GPR161/NCSTN/MVB12B/TRIM27/NOX.  
5/NAA38/GID8/KLHL22/ANAPC1/TWISTNB/WDR26/MSL1/KMT2A/JARID2/PCGF1/BCCIP/RBM15/BRG









/ABCF1/RAB3C/DDX51/PPA1/DYNC2LI1/FIGNL1/ARL3/TNNT2/EIF5B/NUDT2/RAB33A/MYL6/ATP6  
/SLFN11/ABCF1/RAB3C/DDX51/PPA1/DYNC2LI1/FIGNL1/ARL3/TNNT2/EIF5B/NUDT2/RAB33A/MYI  
/SLFN11/ABCF1/RAB3C/DDX51/PPA1/DYNC2LI1/FIGNL1/ARL3/TNNT2/EIF5B/NUDT2/RAB33A/MYI

RA/PPP1R14C/GMFB/SERPINB9/CCL8/EGF/CAV1/ATP7A/DNAJC1/DAB2IP/RPTOR/ARL1/PREX1/G

















1/HR/RUNX2/MEIS1/PSPC1/HOXB5

S7/NBN/FBXW5/PLK3/HNRNPU/RNF2/ZFYVE19/OPTN/CCNE2/HAUS5/MASTL/CDK11B/LZTS1/BCL2L

CC2/ZMPSTE24/PPP2R3C/ACE/ZBTB24/ESRRA/TSC1/TNFSF13/XRCC5/SMAD3/SLC7A6OS/RPL22/SI

DHX9/ID01/RUNX3/ELMO2/ZMIZ1/PSMC5/ADORA2B/UBE2N/KITLG/EREG/CCL19/XCL1/CD247/TLR

C1/DCLRE1C/PAGR1/FBX06/ERCC3/CIB1/DNASE1L1/MMS22L/PTPRC/STUB1/METTL4/HUWE1/TRRAI

3/HNRNPA0/ZNF473/ACIN1/TFIP11/CELF2/RP9/IK/RPS6/RPF1/RPRD1A/MRM2/PPP1R8/CHD7/RI

LAGL1/TMEM161A/RAD54B/LIG3/HELB/XRCC5/SMC1A/FAAP100/ACTR2/SUPT16H/ACKR3/MAEL/TP

31A/CTDP1/SRPK2/TRAM1/RPL13/IFITM2/VRK2/DDB1/SKP2/CCR3/P4HB/PSMB1/RAB1B/NCKAP1/I  
GTPBP1/POLDIP3/RPL11/THOC7/RPL10/HNRNPD/RPS24/PRMT5/FASTKD5/SNRNP200/RBM22/DDX2

E24/UBR4/CHMP6/CUL7/RNF19A/PLEKHG5/BAP1/SMAD3/USP33/UGGT1/UGGT2/USP24/FBXL18/TS

AR/SMURF2/TPR/RNF40/PHF23/OGT/NUP50/ASB2/MAPK9/LZTR1/CDC26/SOCS5/WDR70/TRIP12/TI  
3/IMMP1L/TIMM9/LRWD1/HEATR3/RPS3A/TIMM22/USP36/NMT1/RPL14/AGPS/ARL3/SRP19/PAM16,  
SP39/NDUFA1/LUC7L/NDUFA8/TBP/EIF6/STRAP/ARF1/IPO4/RHOBTB2/SFSWAP/POMP/GMFB/HAX1,

LN2/ULK1/TCHP/DMTN/DYNC2LI1/CEP97/NPHP1/IFNG/FAM98A/AIM2/MAPK15/EIF4G1/TERF1/CN  
HOC1/NELFCD/RPS14/GTF2F1/CRTC3/CALM3/RPS27/ERCC3/ZC3HAV1/RPL29/EIF2D/KLC1/LARP1,  
NB9/CCL8/CAV2/CAV1/EIF3G/SUPT4H1/SRCAP/HMGA2/RPTOR/PARP10/MORC2/THOC1/NELFCD/RP

IP/RELA/AIM2/PSMB7/IPO7/SKP1/AKAP8/CHID1/POLR3A/HLA-E/CHGA/NOD1/TRIM15/NLRC4/BP

RB2

RNPB/TRIM27/MADD/NEURL1/ANKRD54/PARK7/RHOH/PDE6G/CCNG2/MYC/SLC27A1/MLLT1/CD4/HY

M46/MAPK15/TERF1/VAMP1/NKD2/PPP1R12A/FZD9/SESN2/SUPT6H/CD19/DNAJC13/PRKCB/CNIH2,  
IPAP1/TARDBP/MYH9/CHMP4A/RER1/HIP1/RILPL2/ALKBH4/ANO7/RFTN1/DVL1/DNAJC11/NLGN4X,

7/EIF3F/EGR2/RNF144A/BRAP/USP36/BCOR/UBE2E3/CAND1/TRIM62/MYC/NUB1/MED20/RNF121/1  
4A/MRPL22/MAPRE2/MAPK9/DZIP1L/IFT81/PCNT/TUBGCP2/ITGB1/CEP78/UBXN2A/EHD3/HPS4/SI

3/BTC/RPA1/BECN1/FBXL7/ANAPC5/EREG/CDC27/SEH1L/CDC34/CNOT3/MUS81/ARF1/TFDP1/UBE:

















101/STRADA/RASGRP1/TNFRSF10A/SMG8/PRKAR2A/MAPKAP1/SMCR8/DUSP26/DAG1

METTL3/CD1A/PPARG/NFKBIL1/PIK3CB/MYO1C/LOXL3/PSMB1/TNFRSF1B/SCARA3/CD59/NCKAP1/1





F2B3/RPL22/UNC13A/GEMIN5/AEBP1/MRPL21/EIF3C/LHB/DDX1/EIF1/APH1A/LTA4H/RPS15A/ATF  
/E4F1/LEO1/GPS2/FBXO30/USP4/TGFBR1/RNF139/PSMC2/NEURL1B/WAC/MED1/GORASP1/PSMA6/1





























ATXN2/NDUFA7/AARS2/MRPS26/C1QBP/MRPS11/ZC3H15/RPL31/B3GALT2/MRPL42/TRMT10C/TPR/1























P4K2B/PSMA3/AAAS/PARK7/DCP2/HNRNPC/RNF144A/USP36/NUB1/UBQLN2/ULK1/WWP2/PAM16/FXI

/JMJD8/RNF19A/NUP214/MUL1/TSC1/TNFSF13/PAIP1/USP33/CPTP/TP53/TARDBP/FEZ1/SPTLC2,









9H1/MSH6/SAP130/PELP1/SMC2/MORF4L1/POLE2/EP400/LDB1/ATR/TP53BP1/SPOUT1/PCGF3/SR  
3/PARP10/GRWD1/RPS14/GET4/ARFGEF1/EXOSC2/EDF1/TAF1B/GEMIN2/ACACA/SRPK2/ZNF346/SI

ONT/KLHL22/TUBGCP2/ZFYVE26/CEP78

FLR1/SYP/MPEG1/CD163

NDUFS3/CWC15/ZBTB4/HR/PSPC1/LPXN/SUDS3/SMN1/HSPA1A/ICE1/USP28/RP2/CRNKL1/GTF2B/I

1/CENPT/MBD2/HUS1/POLR2B/HTRA2/ASF1A/MAX/RELA/NSD1/TERF1/PPP1R12A/HNRNPA2B1/FAM  
CHAC1/SDF4/ERGIC2/RHBDD2/ATP9A/QSOX2/ACBD3/SCARA3/CD59/RAB1B/IER3IP1/TLR8/AP4B1,

3/PRPF38B/HNRNPA0/MRPL36/TFIP11/MOV10/RPL4/CELF2/RPL41/IK/NIP7/SMG7/RPL9/MRPL14,



1/SYT11/PRF1/HLA-C/RNF144A/OSBPL9/HLA-DOB/IGF2R/MYO1D/VAMP3/RAB22A/RAB3C/AP5S1/1  
CC3/PHC1/MED31/SPTSSB/UBE2V2/ZNFX1/NSMCE1/WDR82/GTF2B/POLR3G/SETD5/LEO1/MAT2A/OI









VOA1/ARL8A/GNG2/RGS4/RAB2A/ENTPD4/RHOD/ERCC2/KIF9/RAB7A/TUBD1  
L6/ATP6VOA1/ARL8A/GNG2/RGS4/RAB2A/ENTPD4/RHOD/ERCC2/KIF9/RAB7A/TUBD1  
L6/ATP6VOA1/ARL8A/GNG2/RGS4/RAB2A/ENTPD4/RHOD/ERCC2/KIF9/RAB7A/TUBD1

TF2F1/ARHGAP22/CALM3/ENSA/ARHGAP27/RIC8B/CIB1/ARHGAP17/MMP15/LLGL2/BMP2/RALBP1/



















1/DYNC1I2/RAB11A/ZPR1/TUBB3/GPR132/CRLF3/NEDD1/KIF20B/MECP2/CENPJ/MITD1/KIF22/B

ETD1A/RASSF2/LILRB1/FUT7/GNAS/CD80/TP53/SOX13/PLD4/RASGRP1/FGL2/LILRB2

7/HSP90B1/PIK3R6/IRAK2/CCL8/CD5/HAX1/IL13RA2/CAV1/TMEM102/TP53BP1/CD84/DAB2IP/A

P/HDAC8/PPARG/DDB1/TFPT/EXO5/TTF1/TFIP11/SPIRE2/SMG7/USP3/POLG2/UCN/CASP3/CCDC8

OK1/ADAR/RTCB/POLDIP3/RPL11/THOC7/HNRNPD/RPS24/PRMT5/FASTKD5/METTTL2A/TRMT2A/SNR

53/INO80E/DDX1/TDP2/COPS7A/ASCC3/KAT5/TREX2/NEK11/MRPS26/MACROD2/RAD23A/APEX1/Z

PLCG1/MX1/RPL4/RPL41/IK/RPL9/RPS6/NCAM1/MAP3K7/TRIM32/VAPA/RPL24/PSMB6/TBC1D20/  
O/ZHX2/PSMA3/DCP2/PYM1/GEMIN8/U2SURP/PDCD11/HNRNPC/RPS3A/THOC3/AURKAIP1/SREK1IP

G101/FBXL2/CDC16/KAT5/UBE2R2/RAD23A/SVIP/PPP1R11/DVL1/DERL3/CLEC16A/RNF41/UBE2J

RIM44/HLTF/KLHL22/ANAPC1/UBXN2A/ASB16/HMG20B/PCGF1/UBE2K/PSME2/PHC1/FANCL/TRIM5.  
/HYAL2/RPL10A/HTRA2/IFNG/ARIH2/TUB/MAPK15/TERF1/IP07/SKP1/RPL12/SRP14/CHGA/SESN.  
/EGF/EIF3G/UQCRB/ATR/NDUFAF6/GRWD1/CAMSAP1/PREX1/COX14/RPS14/CCDC65/ARFGEF1/RPS

OT2/CHGA/DOCK11/ATG3/CDK5RAP2/MAP4K4/RHOD/ERCC2/PTPRS/KIF9/RAB7A/EP8L2/CARMIL2.  
/VPS4A/NECTIN2/PABPN1/RAB1A/CTDP1/SRPK2/TRAM1/RPL13/IFITM2/VRK2/DDB1/SKP2/CCR3/.  
S14/GTF2F1/CRTC3/CALM3/RPS27/ERCC3/ZC3H4V1/RPL29/EIF2D/KLC1/LARP1/VPS4A/NECTIN2.

IFB1/PTPRS/CLEC4A/APPL2/RPS6KA3/TLR1/S100A1/MPEG1/MUL1/TRIM56/NOD2/ARG2/XRCC5

AL2/JTB/IFNG/MAPK15/TERF1/CCNJ/IP07/ZNF622/HNRNPA2B1/SESN2/MAP3K9/NOD1/CD19/DUS

/MAP4K4/PIK3R2/CHRNA5/NOLC1/PTPN14/UBL5/SYP/NUP214/HDAC3/BAP1/ANKRD13A/SMAD3/UN  
/ARFGAP3/LRP4

WWP2/ARIH2/RELA/RNF126/PSMB7/STAMBPL1/RNF115/SKP1/ANKIB1/MED30/MKRN1/ATG3/SUMO3  
PATA6/GABARAP/BCCIP/GAP43/MFSD14A/ATG9B/ATXN10/PDGFRB/RAB38/CFAP157/PDGFRB/HSPA

2E2/SMC2/CACUL1/HTT/POLE2/CAV2/EGF/HMGA2/RPTOR/ATAD5/CALM3/ENSA/ERCC3/PKD1/BORA

















PLCG1/ADCY7/TLR8/EIF2B4/MAP3K7/NFKBID/PSMB6/CLEC2D/ADAR/FFAR2/CD22/BCR/CNPY3/MF





XN2/NDUFA7/AARS2/DNPEP/MRPS26/C1QBP/ECE1/MRPS11/ZC3H15/RPL31/MRPL42/TRMT10C/TPR  
RLIM/XIAP/UHRF2/RNF215/CUL2





























PASK/LSM14A/MRPL22/SPTSSA/NOA1/MRPL58/METTL16/EIF4ENIF1/ZC3H12D/MRPL38/MRPS30/G























R1/HTRA2/IFNG/ARIH2/SYCRIP/RELA/TLK2/MAPK15/ATP6VOA1/EIF4G1/PSMB7/NKD2/TBC1D25.



/DAPL1/CHMP4A/FBXL2/TFEB/KAT5/SMCR8/MTDH/RAD23A/SVIP/APEX1/MCL1/DVL1/PARN/DERL3.







CAP/HMGA2/ATAD5/MORC2/GRWD1/THOC1/DCLRE1C/CSNK2A2/MMS22L/SIN3B/LIN37/PAF1/RRAP.  
RP68/ZNF16/DDX52/IP6K2/COIL/STK35/RBM4B/RPL13/ERGIC2/TEX10/PWP1/SKP2/PIK3CB/MYO

PCNP/GPATCH2/SF1/TUT1/MAGEA11/CIR1

111A/SMC1B/LRIF1/SUPT6H/KDM3A/MBD1/PPP1CB/SUMO3/SMAD2/WBP2/REPIN1/ORC4/PPP2CA/H  
/ABCA7/NCAM1/VAPA/TBC1D20/ST3GAL2

/RPS6/RPF1/USP3/PPP1R8/RPL24/OGFOD1/SRA1/RIOK1/ADAR/BTBD1/UNK/LRPPRC/POLDIP3/RP.



ULK1/CTSL/CD4/CTSB/ANXA1/CD207/VPS33B/VPS29/ATP6V0A1/STAMBPL1/FKBP15/TMEM127/CT.  
RMDL1/SUPT20H/TGFBR1/CHD8/ZSWIM6/KAT7/RPRD2/MED1/KANSL1/POLD4/PFKL/CUL2/CRCP/FB.









CST3/PITRM1/LXN/ARHGAP33/FAF2/EVI5L/CXCL10/ASAP3/RALGAPB/ATP1B1



















TG3/PSMC3/NCAPD3/CHFR/TPD52L1/RHOA/NEK6/YWHAG/CLTC/PPAT/HINFP/FAP/LGMN/PSMC5/CN

TAD5/INPP5D/DUSP22/CD3G/PTPRC/NECTIN2/CLEC4E/BAG6/CRLF2/ZCCHC3/BTN2A1/ZNF16/CXC

8A/COPS8/HNRNPD/PRMT5/NCOA6/TCEA1/MGME1/PARK7/DCP2/HNRNPC/LRWD1/UNG/SETDB1/LIN9

NP200/RBM22/DDX20/WDR12/THADA/GEMIN8/U2SURP/PDCD11/HNRNPC/USP36/THOC3/AURKAIP1/

BTB47/MCL1/FAM168A/BAZ1B/MRPS11/SETMAR/TAOK1/SLX4/POLD2/ACTR8/NACC2/MEN1/NFRKB

ADAR/RPL11/RPL10/RPS24/FDPS/MVB12B/TRIM27/GTF2A2/KPNA4/PSMA3/AAAS/EIF3F/UNG/RPS  
1/AGO1/RPL14/POLR2B/BUD13/RPL10A/FXR1/GEMIN6/SYNCRIP/SMN2/EIF4G1/PSMB7/CNOT2/HN

1/WNT5A/LRP2/ARRB1/PSMD12/BFAR/ARMC8/SMURF2/RNF40/OGT/MAPK9/CDC26/SOCS5/USP46/T

/TRIM3/TRIM36/ZC3HC1/MED31/HACE1/RAB40B/UBE2V2/G2E3/HSPA1A/RMND5B/NSMCE1/NUP133

2/TTC21A/RPS18/RNF186/RPS28/PIK3R2/RAB7A/TYSND1/CNEP1R1/RPS17/APPL2/NOLC1/UBL5/  
27/ERCC3/TAF1B/STUB1/EIF2D/GEMIN2/NDUFB4/SRSF1/RAB1A/SRPK2/TM9SF4/CCDC40/VPS16/

/ACE/SPICE1/PLXNB3/TSC1/XRCC5/SMC1A/SMAD3/RAC3/ACTR2/IKBKB/IFT140/CPTP/GBA2/TSG

P4HB/PSMB1/RAB1B/NCKAP1/PLCG1/MX1/RPL4/RPL41/IK/RPL9/RPS6/NCAM1/MAP3K7/TRIM32/V  
/PABPN1/RAB1A/CTDP1/SRPK2/TRAM1/RPL13/IFITM2/VRK2/DDB1/SKP2/CCR3/P4HB/PSMB1/RAB

P14/RGS4/MAP4K4/PIK3R2/MAP3K11/VAV3/CHMP6/PPP2R3C/JMJD8/ACE/SLA2/MUL1/WNK1/TSC1

C13A/TTL/TSG101/TP53/IWS1/GRIPAP1/NEFH/TARDBP/FEZ1

/SMAD2/RNF186/DERL1/KCTD13/SEN5/UBR4/CUL7/RNF19A/NUP214/MUL1/TRIM56/NOD2/HDAC3  
1A/TRAF3IP1/ABT1/CNOT1/FARP2/STX12/TMEM41B/ATAT1/NLGN2/CEP126/CLUAP1/CHMP2B/MAP

/ACTR1A/OFD1/ANAPC4/VPS4A

















HAS1/TRIM27/PLA2G6/ICAM2/PSMA3/PARK7/IRF4/HLA-C/PDE4B/POLR3F/EIF2B1/ADGRE2/CTSL







/PASK/LSM14A/MRPL22/NOA1/MRPL58/METTL16/EIF4ENIF1/ZC3H12D/MRPL38/MRPS30/GSPT1/A



























SPT1/AIMP1/STAT3

























/ANKIB1/SESN2/NOD1/PPP1CB/ELAVL1/PIK3R2/RAB7A/TYSND1/KDM4A/FASTKD1/ZMPSTE24/CHM

/ABL2/ATP6V1D/CLEC16A/PPP1R3D/RNF41/TICAM1/UBE2J1







/HDAC8/PWP1/DDB1/JUNB/TFPT/TRPS1/TFIP11/PRR14/ASXL1/IK/USP3/POLG2/LRPPRC/THOC7/  
1C/ACIN1/TTF1/TFIP11/CASK/RPL4/NIP7/RPS6/RPF1/MRM2/PLEKHM1/CHD7/ADAR/RPL11/ATF6

ELB/XRCC5/SMC1A/SMAD3/MYCN/ACTR2/SETD1A/MAU2/RASSF2/MAEL/BAZ1A/TP53/INO80E/TARD

L11/RPL10/HNRNPD/RPS24/FASTKD5/MRPL3/SNRNP200/RBM22/DCP2/WDR12/PDCD11/HNRNPC/EI



NS/DENND6A/CHID1/HLA-E/ARL8A/DNAJC13/DERL1/RHOD/RAB7A/CHMP6/APPL2/CARMIL2/CYB56  
XW11/PRPS2/POLR1D/AEBP2/FBX027/POLR2J3/SETD1B/RNF168/TAF4B/PLRG1/RECQL5/KEAP1/K





























OT10/POLE3/BTC/RPA1/BECN1/FBXL7/ANAPC5/EREG/CDC27/SEH1L/CDC34/CDK11A/CNOT3/MUS8

L10/CNR1/CD1A/NFKBIL1/PIK3CB/MYO1C/PSMB1/DOCK8/ACIN1/SCARA3/CD59/NCKAP1/PLCG1

/MYC/SLFN11/AP5S1/MBD2/HUS1/POLR2B/PRMT6/FIGNL1/APOBEC3F/EYA3/PAM16/ASF1A/MAPK1

SREK1IP1/AGO1/RPL14/DDX51/POLR2B/DUS1L/BUD13/RPL10A/ZNHIT3/GEMIN6/SYNCRIP/SMN2/

3A/IGF2R/SETDB1/TRIM62/RPL14/POLR2B/PRMT6/UCLL1/CD4/APOBEC3F/WWP2/HYAL2/BRD4/RP  
RNPA2B1/RPL12/SUPT6H/RPS18/ERCC2/RPS28/U2AF1L4/ELAVL1/FASTKD1/LUC7L3/SRSF3/RPS1

RIP12/KLHL22/ANAPC1/PCBP2/DNAJC18/CCDC115/UBXN2A/DACT1/ADAMTS7/ZFAND2B/USP13/AZ

/KLHL36/PSMD6/MALT1/PCNP/E4F1/LEO1/GPS2/FBX030/USP4/TGFBR1/RNF139/PSMC2/NEURL1B  
NUP214/HDAC3/BAP1/XRCC5/ANKRD13A/SMAD3/RPL22/MAU2/IFT140/BICD2/GNPAT/RAB6A/TSG1  
COIL/DHX30/ADD1/SC02/SNRPD3/DDB1/MY01C/SPIRE2/NCKAP1/COX7A2/PPP1R9A/MX1/CELF2/N

101/TP53/CNTROB/FEZ1/CEP135/ATXN2/ARPIN/CHMP4A

APA/RPL24/PSMB6/TBC1D20/ADAR/RPL11/THOC7/RPL10/RPS24/FDPS/MVB12B/TRIM27/GTF2A2/  
1B/NCKAP1/PLCG1/MX1/RPL4/RPL41/IK/RPL9/RPS6/NCAM1/MAP3K7/TRIM32/VAPA/RPL24/PSMB

/NOD2/PPP2CA/XRCC5/CARD14/RASSF2/MAP3K12/PDE5A/AFAP1L2/TSG101/TP53/STRADA/RASGR

/BAP1/SMAD3/USP33/TULP4/RNF10/USP24/SUPT3H/RNF135/FBXL18/TSG101/TP53/INO80E/BCL  
RE3/CHMP2A/CFAP53/NPRL2/CEP162/ACTA1/KIFAP3/EIF2A/NTNG2/DCTN3/NEK8/CHMP7/VPS37A

















/CD4/IFNG/CTSB/ANXA1/RELA/AIM2/PSMB7/CCR2/KLHL6/PRAM1/SKP1/HLA-E/EIF2B2/SUPT6H/







IMP1/STAT3





















































P6/PNPT1/SERBP1/JMJD8/RNF19A/NUP214/MUL1/TSC1/PLEKHG5/TNFSF13/SMAD3/PAIP1/USP33









TTI1/PHF1/PARK7/IRF4/BUB3/HNRNPC/LRWD1/ING2/THOC3/SETDB1/MYC/SLFN11/YY1AP1/CENP  
B/TRIM27/TCEA1/CC2D1A/DDX31/SLC30A5/PYM1/WDR12/PDCD11/LRWD1/RPS3A/USP36/ZNF506/

BP/TEP1/KAT5/KDM3B/ETV3/SMCR8/HMGN3/SUZ12/SKA2/APEX1/BAZ1B/HMGXB4/SETMAR/L3MBTL

F3F/RPS3A/AURKAIP1/MRPL20/AGO1/ABCF1/RPL14/DYRK3/BUD13/APOBEC3F/SRP19/MRPL24/MR





1A3/ACE/SLA2/TRAK2  
DM6A/CDK12/MED21



























1/ARF1/TFDP1/UBE2E2/MAEA/SMC2/CACUL1/HTT/POLE2/CAV2/EGF/HMGA2/RPTOR/ATAD5/CALM3

5/DNASE1/TERF1/HNRNPA2B1/FAM111A/SESN2/SUPT6H/MBD1/ERCC2/E2F7/KCTD13/ZMPSTE24/T

CLK2/HNRNPA2B1/THUMP2/RBMS2/SUPT6H/RRP15/SMAD2/WDR3/ERCC2/RPS28/U2AF1L4/ELAVL1

L10A/CTSB/SYNCRIP/RELA/VPS29/EIF4G1/PSMB7/CCR2/IP07/FAM111A/SKP1/RPL12/SUPT6H/T  
7/PNPT1/SERBP1/UBL5/NUP214/TRA2B/PPP2CA/HNRNPLL/TNFSF13/PAIP1/SUGP1/RPL22/ZRANB

IN1/UBE2K/PSME2

WAC/MED1/GORASP1/PSMA6/RLIM/XIAP/UHRF2/UBA3/RNF215/CUL2/FBXW11/RASD2/UBE3C/GNL  
01/TP53/DDX1/TARDBP  
DUFA9/NDUFB11/NIP7/PXN/RPL24/OGFOD1/TBC1D20/ADAR/NDUFA12/RPL11/RPL10/COPS8/PRMT

KPNA4/PSMA3/AAAS/EIF3F/UNG/RPS3A/IGF2R/THOC3/SETDB1/TRIM62/RPL14/ULK1/POLR2B/PR  
6/TBC1D20/ADAR/RPL11/THOC7/RPL10/RPS24/FDPS/MVB12B/TRIM27/GTF2A2/KPNA4/PRF1/PSM

P1/TNFRSF10A/SMG8

.11A/FBXL2/CDC16/COPS7A/MIB2/UBE2R2/SUZ12/RAD23A/PPP1R11/RNF214/KCTD9/OTUD5/NLRP  
/AMBRA1/EIF2S1/WIP1/ALMS1/SCLT1/MKS1/CEP295/DNAAF3/LRR6/CHMP5

















NOD1/CD19/TRIM15/PRKCB/NLRC4/BPIFB1/PTPRS/PIK3R2/CLEC4A/VAV3/APPL2/RPS6KA3/PPP2





























































/CPTP/TP53/TARDBP/FEZ1/SPTLC2/DAPL1/CHMP4A/FBXL2/TFEB/KAT5/SMCR8/MTDH/RAD23A/SV









T/MBD2/HUS1/POLR2B/FIGNL1/BRD4/HTRA2/PBX4/ASF1A/MAX/RELA/NSD1/TERF1/C1orf131/PP  
MYC/URB2/YY1AP1/DDX51/MNX1/MLLT1/AGPS/HUS1/PRMT6/UBLCP1/SRP19/NKRF/FXR1/RDM1/CT

1/TAF4/SLX4/POLD2/ACTR8/NACC2/MEN1/NFRKB/ARRB1/SP1/TNKS1BP1/ACTR6/TPR/RNF40/PUR

PS16/RPL10A/ZNHIT3/FXR1/MRPL55/SYNCRIP/SMN2/CHCHD1/EIF4G1/CNOT2/ZNF622/CCDC12/H

































;/ENSA/ERCC3/CIB1/PKD1/BORA/ACTR1A/OFD1/ANAPC4/TADA3/VPS4A

MEM161A/REPIN1/RAD54B/LIG3/ORC4/PPP2CA/HELB/TNFSF13/XRCC5/SMC1A/FAAP100/ACTR2/S

/LUC7L3/SRSF3/ZMPSTE24/RPS17/PTCD1/PNPT1/NOLC1/UBL5/TRA2B/PPP2CA/HNRNPLL/SMAD3/

RIM15/RPS18/DERL1/ERCC2/RPS28/RAB7A/KDM4A/UBR4/CHMP6/RPS17/CUL7/NUP214/XRCC5/SM  
2/GEMIN5/SAFB/ZNRD1/TP53/IWS1/DDX1/LSM3/TARDBP/RPS15A/SMG8/GRSF1/C1QBP/APEX1/PA

.3L/FBX027/SPRTN/PLAA/RNF168/PSMD5/KEAP1/PIAS2/MED21/UBC/SOCS4/DNAJA1/NUP35/FBXL

'5/TRIM27/GTF2A2/NDUFAF4/CAPZA2/COA4/SNRNP200/DDX20/NAA60/ERAL1/GEMIN8/EIF3F/MRF

MT6/UCKL1/CD4/APOBEC3F/WWP2/HYAL2/BRD4/RPL10A/CTSB/SYNCRIP/RELA/VPS29/EIF4G1/PS  
IA3/AAAS/EIF3F/UNG/RPS3A/IGF2R/THOC3/SETDB1/TRIM62/RPL14/ULK1/POLR2B/PRMT6/UCKL1



'3/RNF41/TICAM1/UBE2J1/ACTR8/NFRKB/ARRB1/PSMD12/BFAR/SMURF2/TPR/RNF40/PHF23/OGT/

















R3C/SLA2/TLR1/S100A1/MUL1/WNK1/NOD2/BTN3A2/ARG2/TNFSF13/XRCC5/SMAD3/EIF2B3/ACTF



























































TP/APEX1/MCL1/DVL1/PARN/DERL3/ABL2/ATP6V1D/CLEC16A/PPP1R3D/RNF41/TICAM1/UBE2J1/











P1R12A/HNRNPA2B1/FAM111A/AKAP8/SMC1B/LRIF1/SUPT6H/KDM3A/MBD1/PPP1CB/SUMO3/SMAD2  
SB/CHCHD1/TERF1/ZNF622/SPIN1/FAM111A/AKAP8/POLR1C/RPL12/PPP1CB/SNAPC5/WDR3/KDM4

B/EZH1/NFATC1

NRNPA2B1/RPL12/SRP14/MRPS2/RBMS2/RRP15/RPS18/WDR3/DERL1/RPS28/U2AF1L4/ELAVL1/LU































UPT16H/ERI1/MAEL/BAZ1A/GNAS/TP53/INO80E/DDX1/TDP2/WIZ/TEP1/SH2B1/COPS7A/ASCC3/F

MYCN/SUGP1/ZRANB2/NOL11/GEMIN5/SAFB/ERI1/CLK3/TP53/IWS1/DDX1/NSUN5P2/LSM3/TARDE

IAD3/RPL22/IKBKB/ACKR3/RAB6A/TSG101/CD80/TP53/TARDBP/RPS15A/TAF11/CHMP4A/FBXL2/C  
RN/NOVA1/RPL31/SRSF10/PSMD12/PNRC2/TNKS1BP1/TRMT10C/RNF40/SRSF7/PRPF40B/TRA2A/F



.15/UBE2W/RWDD3/UCHL3/GOLGA2/CDK5RAP3/TRIM9/ANGPT1/UBOX5/RNF181/PTPN22/MKRN2/RNF

'L20/VAMP3/AGO1/CAND1/CENPT/MBD2/DMTN/SRP19/ZNHIT3/ASF1A/GEMIN6/SMN2/NDUFB2/EIF4

MB7/CCR2/IP07/FAM111A/SKP1/RPL12/SUPT6H/TRIM15/RPS18/DERL1/ERCC2/RPS28/RAB7A/KI  
./CD4/APOBEC3F/WWP2/HYAL2/BRD4/RPL10A/IFNG/CTSB/SYNCRIP/RELA/VPS29/EIF4G1/PSMB7/

'NUP50/ASB2/MAPK9/LZTR1/CDC26/SOCS5/TAB1/WDR70/USP46/TRIP12/TRIM44/HLTF/KLHL22/'

















2/IKBKB/LILRB1/RNF135/CD80/DDX1/RASGRP1/FGL2/LILRB2



























































WNT5A/LRP2/PSMD12/SMURF2/TPR/RNF40/PHF23/GATA4











! /WBP2/REPIN1/ORC4/PPP2CA/HELB/XRCC5/SMC1A/SMAD3/MYCN/ACTR2/SUPT16H/SETD1A/MAU2/  
!A/SENP5/YPEL4/PNMA2/NOLC1/RBM34/ORC4/ESRRA/ABTB1/GTF3C3/XRCC5/MYCN/STAU2/NOL11/

IC7L3/RPS17/PNPT1/NOLC1/TRA2B/RPL26L1/XRCC5/SUGP1/RRBP1/RPL22/GEMIN5/ERI1/MAEL/M

































KAT5/TREX2/RAD23A/APEX1/PARN/FAM168A/TEFM/SETMAR/TAOK1/SLX4/POLD2/ACTR8/MEN1/NFI

IP/METTL2B/ZNHIT6/AARS2/TSR1/METTL6/GRSF1/RPP38/C1QBP/PARN/MRPS11/NOVA1/THUMP3/I

TF2E1/COPS7A/KAT5/DAG1/C1QBP/RAD23A

PRMT7/CACTIN/RSRC1/METTL16/BCAS2/ZC3H12D/SNRNP35/PHRF1/DDX46/ZCRB1/GSPT1/STAT3/I

208/FBX022/PAXIP1/NUP98/KLHL7/ANAPC13/DCAF12/RABGEF1/KCTD6/HDAC4/DDRKG1/MTOR/CI

IG1/NDUFAF3/TERF1/VAMP1/CNOT2/RPL12/MRPS2/TBCE/CDK5RAP2/SMAD2/ERCC2/RPS28/LUC7L5

M4A/UBR4/CHMP6/RPS17/CUL7/NUP214/XRCC5/SMAD3/RPL22/IKBKB/ACKR3/RAB6A/TSG101/CD8  
'CCR2/IP07/FAM111A/SKP1/RPL12/CHGA/SUPT6H/TRIM15/RPS18/DERL1/ERCC2/RPS28/RAB7A/P

ANAPC1/UBXN2A/ASB16/HMG20B/USP13/PCGF1/UBE2K/PSME2/BRCC3/OTUD6B/PHC1/FANCL/TRIM5

























































































'RASSF2/MAEL/BAZ1A/TP53/INO80E/TARDBP/TEP1/KAT5/KDM3B/ETV3/SMCR8/HMG3/SUZ12/SK/  
'ERI1/ZNRD1/TSG101/TP53/INO80E/NSUN5P2/TDP2/ABCB8/KAT5/TSR1/MTDH/NEK11/MACROD2/I

IRPL21/EIF3C/DDX1/LSM3/TARDBP/EIF1/RPS15A/TEP1/ZNHIT6/ATXN2/NDUFA7/TSR1/GRSF1/MI

































3KB/CD40

3QTRT2/SRSF10/WDR74/DUS3L/WDR18/TARBP1/TRMT10C/RNF40/SRSF7/PRPF40B/ANKRD16/TRA2

3RDT/PCBP2/SKIV2L/PSIP1/DCP1A/CSDE1/SMU1/AAR2/PRPF40A/AKAP17A/XAB2/ECD/PSME2/SYI

OC73/PSME4/RNF38/KBTBD8/NEDD4L/TRIM33/CAMLG/KCTD11/ANAPC2/CDC20B/UBE2V1/PSME1/A  
3/NAP1L3/CARMIL2/BRF2/BBS12/SEC23B/GTF3C3/CADPS2/SMAD3/RAC3/ACTR2/UNC13A/GEMIN5,

30/TP53/TARDBP/RPS15A/TAF11/CHMP4A/FBXL2/GTF2E1/COPS7A/KAT5/DAG1/C1QBP/RAD23A  
DM4A/UBR4/CHMP6/RPS17/CUL7/MPEG1/NUP214/XRCC5/SMAD3/RPL22/IKBKB/ACKR3/RAB6A/TS

5/TRIM3/TRIM36/ZC3HC1/MED31/HACE1/RAB40B/COPS3/UBE2V2/G2E3/SUDS3/YOD1/HSPA1A/RMI

























































































12/APEX1/BAZ1B/HMGXB4/SETMAR/L3MBTL1/TAF4/SLX4/POLD2/ACTR8/NACC2/MEN1/NFRKB/ARRI  
RPP38/SUZ12/C1QBP/APEX1/PARN/MAK16/ZC3H15/TMEM179B/SETMAR/NOVA1/THUMP3/SNAPC1/1

RPS26/RPP38/APEX1/TDRD7/SRP72/MAK16/MRPS11/DERL3/TEFM/RPL31/WDR74/DDX19A/PNRC2/1

































A/PRMT7/CACTIN/RSRC1/METTL16/BCAS2/SNRNP35/RBMS1/PHRF1/DDX46/ZCRB1/BRDT/PCBP2/DI

72/RBM15/XRN2/TFCP2/PCIF1/PTBP2/CARHSP1/SNUPN/HNRNPH1/CWC15/WDR83/PAPOLA/SMN1/H

5B3/CUL1/PEX2/ATG5/RNF31/RNF20/RNF175/NUP160/CBLB/DCAF4/UBE3D/PPIL2/RRAGA/TRIM1'

/CPTP/GBA2/EIF3C/TP53/DDX1/LSM3/TBPL1/NEFL/TAF11/ZNHIT6/ATXN2/ARPIN/NDUFA7/CHMP4

3101/CD80/TP53/TARDBP/RPS15A/TAF11/CHMP4A/FBXL2/GTF2E1/COPS7A/KAT5/DAG1/C1QBP/R

ND5B/NSMCE1/USP28/NUP133/KLHL36/PSMD6/MALT1/PCNP/E4F1/LEO1/GPS2/GATA3/FBX030/USI

























































































31/SP1/TNKS1BP1/ACTR6/TPR/RNF40/PURB/EZH1/NFATC1/MCM3AP/RCCD1  
VACC2/PIN4/WDR74

NUFIP2/MRPL42/BTF3/TRMT10C/PRPF40B/LSM14A/TRA2A/MRPL22/CACTIN/MRPL58/EIF4ENIF1/I

































USP11/MRM1/PSIP1/CDKAL1/SMU1/AAR2/PRPF40A/AKAP17A/XAB2/ECD/SYF2/RBM15/XRN2/TRIT

SPA1A/HNRNPH2/CNOT1/CRNKL1/PSMD6/SF1/HNRNPH3/LEO1/TUT1/AHCYL1/CIR1/RPS25/ZMAT2/1

4A/TBCC/COPS7A/AARS2/HIP1/PSMG2

AD23A

P4/TGFBR1/RNF139/PSMC2/NEURL1B/USP32/WAC/MED1/GORASP1/PSMA6/RLIM/XIAP/UHRF2/UBA

























































































BCAS2/ZC3H12D/SNRNP35/MRPL38/MRPS30/RBMS1/NAA38/ZCRB1/MRPS27/DCP1A/SMU1/AAR2/PR

































1/PTBP2/SNUPN/ADAT2/HNRNPH1/ELP6/SHQ1/CWC15/WDR83/PAPOLA/SMN1/NOP14/HSPA1A/ABT1

USP4/CWF19L1/NBAS/SF3A1/PSMC2/DIS3L2/SRSF4/GPATCH1/RPRD2/PDCD7/MED1/PSMA6/CLP1/



3/RNF215/CUL2

























































































PF40A/AKAP17A/XAB2/SYF2/TDRD5/PTBP2/CARHSP1/TRIM5/HNRNPH1/MRPS18A/CWC15/TOP2B/S

































/HNRNPH2/CRNKL1/DEDD2/SF1/HNRNPH3/LE01/TUT1/INTS3/AHCYL1/CIR1/ZMAT2/USP4/CWF19L

NUDT21





























































































LIRP/WDR83/SMN1/NOP14/HSPA1A/HNRNPH2/CNOT1/EIF3J/CRNKL1/MTG2/MEX3B/RWDD1/SF1/HN

































1/NSUN2/WDR43/SF3A1/NSA2/SRSF4/GPATCH1/RPRD2/PDCD7/CLP1/MRPS9/NUDT21/CLASRP/TSR































































































RNPH3/MRPL43/RPS25/ZMAT2/NFATC2/CWF19L1/NSUN2/SF3A1/APOBEC3H/PSMC2/DIS3L2/CTSH/































2/RBM4































































































NSA2/GPATCH1/PDCD7/WAC/PSMA6/MRPS9/EIF2A/RBM4/MRPL50
