# Supplementary material for: The Landscape of Using Glycosyltransferase Gene Signatures for Overall Survival Prediction in Hepatocellular Carcinoma
Source: Hindawi journal article supplement (doi:10.1155/2022/5989419), 2022-06-21
Supplement: f1 [file 5989419.f1.zip]

|            | Time | Status | Age     | Gender | M  | N  | Pathologic |
|------------|------|--------|---------|--------|----|----|------------|
| TCGA-2V-A  | NA   |        | 0 NA    | Male   | MX | NX | Stage II   |
| TCGA-2Y-A  | 724  |        | 1 < 60  | Male   | MX | NX | NA         |
| TCGA-2Y-A  | 1939 |        | 0 < 60  | Female | MX | NX | Stage I    |
| TCGA-2Y-A  | 1271 |        | 1 >= 60 | Male   | MX | NO | Stage I    |
| TCGA-2Y-A  | 848  |        | 1 >= 60 | Female | MX | NX | Stage II   |
| TCGA-2Y-A  | 3675 |        | 0 < 60  | Male   | MO | NO | Stage III  |
| TCGA-2Y-A  | 1229 |        | 1 < 60  | Male   | MX | NX | Stage I    |
| TCGA-2Y-A  | 1731 |        | 0 >= 60 | Female | MX | NO | Stage I    |
| TCGA-2Y-A  | 1516 |        | 0 < 60  | Male   | MX | NX | Stage II   |
| TCGA-2Y-A  | 1452 |        | 0 >= 60 | Male   | MX | NO | Stage I    |
| TCGA-2Y-A  | 555  |        | 1 < 60  | Female | MX | NO | Stage I    |
| TCGA-2Y-A  | 357  |        | 0 >= 60 | Female | MX | NX | Stage I    |
| TCGA-2Y-A  | 1168 |        | 0 >= 60 | Female | MX | NO | Stage I    |
| TCGA-2Y-A  | 633  |        | 1 >= 60 | Female | MX | NX | NA         |
| TCGA-2Y-A  | 697  |        | 0 >= 60 | Male   | MX | NO | Stage I    |
| TCGA-3K-A  | 396  |        | 0 >= 60 | Male   | MX | NX | Stage III  |
| TCGA-4R-A  | 262  |        | 1 >= 60 | Male   | MX | NX | Stage II   |
| TCGA-5C-A  | 328  |        | 0 < 60  | Male   | MO | NO | Stage II   |
| TCGA-5C-A  | 20   |        | 0 >= 60 | Male   | MO | NO | Stage II   |
| TCGA-5R-A  | 449  |        | 0 < 60  | Female | MO | NO | Stage III  |
| TCGA-5R-A  | 46   |        | 1 >= 60 | Female | MO | NO | Stage II   |
| TCGA-BC-A1 | 1135 |        | 1 >= 60 | Female | MX | NX | NA         |
| TCGA-BC-A1 | 308  |        | 1 >= 60 | Female | MX | NX | NA         |
| TCGA-BC-A1 | 1423 |        | 1 >= 60 | Male   | MX | NX | NA         |
| TCGA-BC-A1 | 837  |        | 1 >= 60 | Male   | MX | NX | NA         |
| TCGA-BC-A1 | 837  |        | 1 >= 60 | Male   | MX | NX | NA         |
| TCGA-BC-A1 | 91   |        | 1 < 60  | Male   | MX | NX | NA         |
| TCGA-BC-A1 | 770  |        | 1 < 60  | Female | MX | NO | Stage III  |
| TCGA-BC-A1 | 711  |        | 1 >= 60 | Male   | MX | NX | NA         |
| TCGA-BC-A1 | 34   |        | 1 >= 60 | Female | MX | NO | Stage I    |
| TCGA-BC-A1 | 2116 |        | 1 < 60  | Female | MX | NX | NA         |
| TCGA-BC-A2 | 1351 |        | 0 >= 60 | Female | MO | NX | Stage III  |
| TCGA-BC-A2 | 1397 |        | 1 >= 60 | Female | MO | NX | Stage II   |
| TCGA-BC-A3 | 8    |        | 0 >= 60 | Female | MO | NX | Stage I    |
| TCGA-BC-A3 | 547  |        | 1 >= 60 | Male   | MO | NX | Stage III  |
| TCGA-BC-A6 | 444  |        | 0 >= 60 | Male   | MO | NX | Stage II   |
| TCGA-BC-A6 | 387  |        | 0 >= 60 | Male   | MO | NO | Stage I    |
| TCGA-BD-A2 | 1363 |        | 0 >= 60 | Male   | MX | NX | NA         |
| TCGA-BD-A3 | 409  |        | 0 >= 60 | Female | MO | NO | Stage I    |
| TCGA-BD-A3 | 1115 |        | 0 >= 60 | Male   | MX | NX | Stage II   |
| TCGA-BW-A3 | 20   |        | 0 < 60  | Male   | MX | NX | Stage III  |
| TCGA-BW-A3 | 0    |        | 0 < 60  | Female | M1 | NO | Stage IV   |
| TCGA-CC-52 | 87   |        | 1 >= 60 | Female | MO | NO | Stage III  |
| TCGA-CC-52 | 97   |        | 1 < 60  | Male   | MO | NO | Stage II   |
| TCGA-CC-52 | 103  |        | 1 >= 60 | Male   | MO | NO | Stage III  |
| TCGA-CC-52 | 102  |        | 1 >= 60 | Male   | MO | NO | Stage III  |
| TCGA-CC-A1 | 219  |        | 0 < 60  | Female | MO | NO | Stage III  |
| TCGA-CC-A1 | 101  |        | 1 < 60  | Male   | MO | NO | Stage III  |
| TCGA-CC-A3 | 303  |        | 1 >= 60 | Male   | MO | NO | Stage III  |
| TCGA-CC-A3 | 363  |        | 0 < 60  | Male   | MO | NO | Stage III  |

|            |       |         |        |    |    |           |
|------------|-------|---------|--------|----|----|-----------|
| TCGA-CC-A5 | 347   | 1 >= 60 | Male   | M0 | NO | Stage III |
| TCGA-CC-A5 | 272   | 1 < 60  | Male   | M0 | NO | Stage III |
| TCGA-CC-A7 | 217   | 1 < 60  | Male   | M0 | NO | Stage III |
| TCGA-CC-A7 | 649   | 1 < 60  | Male   | M0 | NO | Stage III |
| TCGA-CC-A7 | 399   | 0 < 60  | Male   | M0 | NO | Stage III |
| TCGA-CC-A7 | 382   | 0 < 60  | Male   | M0 | NO | Stage II  |
| TCGA-CC-A7 | 262   | 1 < 60  | Male   | M0 | NO | Stage III |
| TCGA-CC-A7 | 278   | 1 >= 60 | Male   | M0 | NO | Stage III |
| TCGA-CC-A8 | 300   | 1 < 60  | Male   | M0 | N1 | Stage III |
| TCGA-CC-A8 | 344   | 1 < 60  | Female | M0 | NO | Stage III |
| TCGA-CC-A9 | 211   | 0 < 60  | Male   | M0 | NO | Stage II  |
| TCGA-CC-A9 | 0     | 0 < 60  | Male   | M0 | NO | Stage III |
| TCGA-DD-A1 | 1149  | 1 < 60  | Male   | M0 | NA | Stage II  |
| TCGA-DD-A1 | 2542  | 1 < 60  | Male   | M0 | NO | Stage III |
| TCGA-DD-A1 | 1622  | 1 >= 60 | Male   | M0 | NO | Stage III |
| TCGA-DD-A1 | 3437  | 0 >= 60 | Female | M0 | NO | Stage II  |
| TCGA-DD-A1 | 79 NA | >= 60   | Male   | M0 | NO | Stage I   |
| TCGA-DD-A1 | 14    | 1 >= 60 | Male   | M0 | NO | Stage I   |
| TCGA-DD-A1 | 662   | 0 >= 60 | Male   | M0 | NO | Stage I   |
| TCGA-DD-A1 | 1560  | 1 < 60  | Female | M0 | NO | Stage I   |
| TCGA-DD-A1 | 2415  | 0 >= 60 | Male   | M0 | NO | Stage II  |
| TCGA-DD-A1 | 2017  | 0 >= 60 | Female | M0 | NO | Stage I   |
| TCGA-DD-A1 | 602   | 0 < 60  | Female | M0 | NO | Stage I   |
| TCGA-DD-A1 | 349   | 1 >= 60 | Male   | M0 | NO | Stage III |
| TCGA-DD-A1 | 1372  | 1 >= 60 | Male   | M0 | NO | Stage I   |
| TCGA-DD-A1 | 1495  | 0 < 60  | Male   | M0 | NO | Stage III |
| TCGA-DD-A1 | 183   | 0 < 60  | Male   | M0 | NO | Stage I   |
| TCGA-DD-A1 | 1005  | 1 >= 60 | Female | M0 | N1 | Stage III |
| TCGA-DD-A1 | 558   | 1 >= 60 | Female | M1 | NO | Stage IV  |
| TCGA-DD-A1 | 415   | 1 < 60  | Male   | M0 | NO | Stage II  |
| TCGA-DD-A3 | 643   | 1 >= 60 | Male   | M0 | NX | Stage II  |
| TCGA-DD-A3 | 1694  | 1 >= 60 | Female | M0 | NX | Stage I   |
| TCGA-DD-A3 | 171   | 1 >= 60 | Male   | M0 | NX | Stage I   |
| TCGA-DD-A3 | 601   | 1 < 60  | Female | M0 | NX | Stage II  |
| TCGA-DD-A3 | 233   | 1 >= 60 | Male   | M0 | NO | Stage III |
| TCGA-DD-A3 | 2131  | 1 >= 60 | Female | M0 | NO | Stage I   |
| TCGA-DD-A3 | 612   | 1 < 60  | Male   | M0 | NO | Stage III |
| TCGA-DD-A3 | 3125  | 1 >= 60 | Female | M0 | NO | Stage III |
| TCGA-DD-A3 | 11    | 1 >= 60 | Male   | M0 | NO | Stage II  |
| TCGA-DD-A3 | 931   | 1 >= 60 | Female | M1 | NO | Stage IV  |
| TCGA-DD-A4 | 989   | 0 < 60  | Male   | M0 | NO | Stage I   |
| TCGA-DD-A4 | 942   | 0 >= 60 | Male   | M0 | NO | Stage I   |
| TCGA-DD-A4 | 802   | 1 >= 60 | Male   | M0 | NX | Stage III |
| TCGA-DD-A4 | 917   | 0 >= 60 | Female | M0 | NO | Stage III |
| TCGA-DD-A4 | 816   | 0 >= 60 | Male   | M0 | NX | Stage II  |
| TCGA-DD-A4 | 928   | 0 < 60  | Female | M0 | NO | Stage II  |
| TCGA-DD-A4 | 1711  | 0 < 60  | Male   | M0 | NO | Stage I   |
| TCGA-DD-A4 | 899   | 1 < 60  | Female | M0 | NO | Stage I   |
| TCGA-DD-A4 | 2245  | 0 >= 60 | Male   | M0 | NO | Stage I   |
| TCGA-DD-A4 | 3308  | 0 < 60  | Male   | M0 | NO | Stage I   |
| TCGA-DD-A4 | 373   | 1 >= 60 | Male   | M0 | NO | Stage II  |

|            |      |         |        |    |    |           |
|------------|------|---------|--------|----|----|-----------|
| TCGA-DD-A4 | 9    | 1 >= 60 | Female | M0 | NO | Stage I   |
| TCGA-DD-A4 | 2456 | 1 >= 60 | Female | M0 | NO | Stage I   |
| TCGA-DD-A4 | 2398 | 0 >= 60 | Male   | M0 | NO | Stage III |
| TCGA-DD-A7 | 728  | 0 >= 60 | Male   | M0 | NO | Stage I   |
| TCGA-DD-A7 | 283  | 1 >= 60 | Female | M0 | NO | Stage I   |
| TCGA-DD-A7 | 701  | 0 >= 60 | Female | M0 | NO | Stage III |
| TCGA-DD-A7 | 44   | 0 >= 60 | Male   | M0 | NO | Stage I   |
| TCGA-DD-A7 | 1085 | 0 >= 60 | Female | M0 | NO | Stage I   |
| TCGA-DD-A7 | 3478 | 0 >= 60 | Female | M0 | NO | Stage I   |
| TCGA-DD-A7 | 16   | 1 >= 60 | Male   | M0 | NO | Stage I   |
| TCGA-DD-A7 | 347  | 0 < 60  | Male   | M0 | NO | Stage I   |
| TCGA-DD-A7 | 2301 | 0 >= 60 | Male   | M0 | NO | Stage I   |
| TCGA-DD-A7 | 2324 | 0 >= 60 | Female | M0 | NO | Stage I   |
| TCGA-DD-A7 | 1685 | 1 >= 60 | Male   | M0 | NO | Stage I   |
| TCGA-DD-A7 | 381  | 1 < 60  | Male   | M0 | NO | Stage I   |
| TCGA-DD-A7 | 365  | 1 >= 60 | Male   | M0 | NO | Stage I   |
| TCGA-DD-A7 | 2102 | 0 >= 60 | Male   | M0 | NO | Stage II  |
| TCGA-DD-A7 | 9    | 0 >= 60 | Male   | M0 | NO | Stage I   |
| TCGA-DD-A7 | 1302 | 0 < 60  | Male   | M0 | NO | Stage I   |
| TCGA-DD-A7 | 1876 | 0 < 60  | Male   | M0 | NO | Stage I   |
| TCGA-DD-A7 | 1804 | 0 < 60  | Male   | M0 | NO | Stage I   |
| TCGA-DD-A7 | 1562 | 0 >= 60 | Female | M0 | NO | Stage I   |
| TCGA-DD-A7 | 1567 | 0 < 60  | Male   | M0 | NO | Stage I   |
| TCGA-DD-A7 | 1531 | 0 < 60  | Male   | M0 | NO | Stage I   |
| TCGA-DD-A7 | 170  | 0 >= 60 | Male   | M0 | NO | Stage II  |
| TCGA-DD-A7 | 1450 | 0 >= 60 | Male   | M0 | NO | Stage I   |
| TCGA-DD-A7 | 171  | 1 >= 60 | Female | M0 | NO | Stage I   |
| TCGA-DD-A7 | 137  | 0 >= 60 | Female | M0 | NO | Stage I   |
| TCGA-DD-A7 | 658  | 0 >= 60 | Male   | M0 | NO | Stage I   |
| TCGA-DD-A7 | 1295 | 0 < 60  | Male   | M0 | NO | Stage I   |
| TCGA-DD-A7 | 1345 | 0 < 60  | Male   | M0 | NO | Stage I   |
| TCGA-DD-A7 | 672  | 0 >= 60 | Male   | M0 | NO | Stage III |
| TCGA-DD-A7 | 1219 | 0 >= 60 | Female | M0 | NO | Stage I   |
| TCGA-DD-A7 | 1242 | 0 < 60  | Male   | M0 | NO | Stage I   |
| TCGA-DD-A7 | 425  | 1 < 60  | Male   | M0 | NO | Stage I   |
| TCGA-DD-A7 | 1231 | 0 < 60  | Male   | M0 | NO | Stage I   |
| TCGA-DD-A7 | 115  | 1 >= 60 | Female | M0 | NO | Stage I   |
| TCGA-DD-A7 | 1145 | 0 >= 60 | Male   | M0 | NO | Stage III |
| TCGA-DD-A7 | 1085 | 0 < 60  | Female | M0 | NO | Stage I   |
| TCGA-DD-A7 | 1066 | 0 >= 60 | Female | M0 | NO | Stage I   |
| TCGA-DD-A7 | 1049 | 0 >= 60 | Female | M0 | NO | Stage II  |
| TCGA-DD-A7 | 636  | 0 < 60  | Male   | M0 | NO | Stage I   |
| TCGA-DD-A7 | 12   | 1 < 60  | Male   | M0 | NO | Stage II  |
| TCGA-DD-A7 | 898  | 0 < 60  | Male   | MX | NX | Stage I   |
| TCGA-DD-A7 | 453  | 0 < 60  | Male   | M0 | NO | Stage I   |
| TCGA-DD-A7 | 458  | 0 < 60  | Male   | M0 | NO | Stage I   |
| TCGA-DD-A7 | 2028 | 0 < 60  | Male   | M0 | NO | Stage I   |
| TCGA-DD-A7 | 474  | 0 >= 60 | Male   | M0 | NO | Stage I   |
| TCGA-DD-A7 | 554  | 0 >= 60 | Male   | M0 | NO | Stage II  |
| TCGA-DD-A7 | 574  | 0 < 60  | Male   | M0 | NO | Stage I   |
| TCGA-DD-A7 | 587  | 0 < 60  | Male   | M0 | NO | Stage I   |

|                        |      |         |        |    |    |           |
|------------------------|------|---------|--------|----|----|-----------|
| TCGA-DD-A <sup>1</sup> | 555  | 0 < 60  | Female | M0 | NO | Stage III |
| TCGA-DD-A <sup>1</sup> | 552  | 0 < 60  | Male   | M0 | NO | Stage I   |
| TCGA-DD-A <sup>1</sup> | 638  | 0 < 60  | Male   | M0 | NO | Stage I   |
| TCGA-DD-A <sup>1</sup> | 566  | 0 < 60  | Male   | M0 | NO | Stage I   |
| TCGA-DD-A <sup>1</sup> | 608  | 0 < 60  | Female | M0 | NO | Stage I   |
| TCGA-DD-A <sup>1</sup> | 644  | 0 >= 60 | Male   | M0 | NO | Stage I   |
| TCGA-DD-A <sup>1</sup> | 722  | 0 >= 60 | Male   | M0 | NO | Stage I   |
| TCGA-DD-A <sup>1</sup> | 478  | 0 >= 60 | Male   | M0 | NO | Stage I   |
| TCGA-DD-A <sup>1</sup> | 763  | 0 < 60  | Male   | M0 | NO | Stage I   |
| TCGA-DD-A <sup>1</sup> | 810  | 0 < 60  | Male   | M0 | NO | Stage I   |
| TCGA-DD-A <sup>1</sup> | 1531 | 0 >= 60 | Male   | M0 | NO | Stage I   |
| TCGA-DD-A <sup>1</sup> | 2728 | 0 < 60  | Male   | M0 | NO | Stage I   |
| TCGA-DD-A <sup>1</sup> | 1823 | 0 < 60  | Male   | M0 | NO | Stage I   |
| TCGA-DD-A <sup>1</sup> | 2455 | 0 < 60  | Male   | M0 | NO | Stage II  |
| TCGA-DD-A <sup>1</sup> | 1718 | 0 < 60  | Male   | M0 | NO | Stage II  |
| TCGA-DD-A <sup>1</sup> | 1970 | 0 < 60  | Male   | M0 | NO | Stage III |
| TCGA-DD-A <sup>1</sup> | 1900 | 0 < 60  | Male   | M0 | NO | Stage I   |
| TCGA-DD-A <sup>1</sup> | 2015 | 0 < 60  | Male   | M0 | NO | Stage I   |
| TCGA-DD-A <sup>1</sup> | 1989 | 0 < 60  | Male   | M0 | NO | Stage III |
| TCGA-DD-A <sup>1</sup> | 1855 | 0 >= 60 | Male   | M0 | NO | Stage I   |
| TCGA-ED-A <sup>4</sup> | 910  | 0 < 60  | Male   | M0 | NO | Stage II  |
| TCGA-ED-A <sup>4</sup> | 819  | 0 < 60  | Male   | M0 | NO | Stage II  |
| TCGA-ED-A <sup>5</sup> | 854  | 0 >= 60 | Female | M0 | NO | Stage II  |
| TCGA-ED-A <sup>6</sup> | 406  | 0 < 60  | Male   | M0 | NO | Stage III |
| TCGA-ED-A <sup>7</sup> | 6    | 0 < 60  | Female | M0 | NX | Stage II  |
| TCGA-ED-A <sup>7</sup> | 390  | 0 < 60  | Female | M0 | NX | Stage II  |
| TCGA-ED-A <sup>7</sup> | 6    | 0 >= 60 | Male   | M0 | NX | Stage II  |
| TCGA-ED-A <sup>7</sup> | 400  | 0 < 60  | Female | M0 | NO | Stage II  |
| TCGA-ED-A <sup>8</sup> | 408  | 0 >= 60 | Female | M0 | NO | Stage III |
| TCGA-EP-A <sup>1</sup> | 570  | 0 >= 60 | Male   | MX | NX | Stage I   |
| TCGA-EP-A <sup>2</sup> | 608  | 0 >= 60 | Male   | MX | NO | Stage I   |
| TCGA-EP-A <sup>2</sup> | 627  | 1 < 60  | Female | MX | NX | Stage III |
| TCGA-EP-A <sup>2</sup> | 596  | 1 < 60  | Female | MX | NX | Stage I   |
| TCGA-EP-A <sup>2</sup> | 19   | 1 >= 60 | Male   | MX | NX | Stage I   |
| TCGA-EP-A <sup>3</sup> | 303  | 0 >= 60 | Male   | MX | NX | Stage I   |
| TCGA-EP-A <sup>3</sup> | 363  | 0 >= 60 | Male   | MX | NX | Stage III |
| TCGA-ES-A <sup>2</sup> | 438  | 1 < 60  | Male   | MX | NX | Stage I   |
| TCGA-FV-A <sup>2</sup> | 1852 | 1 >= 60 | Female | M0 | NO | Stage II  |
| TCGA-FV-A <sup>2</sup> | 729  | 0 >= 60 | Male   | MX | NO | Stage I   |
| TCGA-FV-A <sup>2</sup> | 581  | 1 >= 60 | Male   | M0 | NO | Stage I   |
| TCGA-FV-A <sup>3</sup> | 848  | 0 >= 60 | Female | M0 | NX | Stage II  |
| TCGA-FV-A <sup>3</sup> | 247  | 1 >= 60 | Female | MX | NO | Stage II  |
| TCGA-FV-A <sup>3</sup> | 194  | 1 >= 60 | Male   | MX | NX | Stage I   |
| TCGA-FV-A <sup>3</sup> | 366  | 1 < 60  | Female | MX | NX | Stage I   |
| TCGA-FV-A <sup>4</sup> | 1    | 0 < 60  | Female | M0 | NX | Stage II  |
| TCGA-FV-A <sup>4</sup> | 10   | 0 >= 60 | Female | M0 | NX | Stage I   |
| TCGA-FV-A <sup>4</sup> | 12   | 0 < 60  | Male   | M0 | NX | Stage I   |
| TCGA-G3-A <sup>2</sup> | 1779 | 0 >= 60 | Male   | M0 | NO | Stage II  |
| TCGA-G3-A <sup>2</sup> | 452  | 1 < 60  | Female | M0 | NO | Stage I   |
| TCGA-G3-A <sup>2</sup> | 655  | 0 < 60  | Male   | M0 | NO | Stage I   |
| TCGA-G3-A <sup>3</sup> | 780  | 0 < 60  | Male   | M0 | NO | Stage III |

|            |      |         |        |    |    |           |
|------------|------|---------|--------|----|----|-----------|
| TCGA-G3-A5 | 594  | 0 < 60  | Male   | M0 | N0 | Stage II  |
| TCGA-G3-A5 | 585  | 0 >= 60 | Male   | M0 | N0 | Stage I   |
| TCGA-G3-A5 | 768  | 1 < 60  | Male   | M0 | N0 | Stage II  |
| TCGA-G3-A5 | 698  | 0 < 60  | Male   | M0 | NX | Stage I   |
| TCGA-G3-A5 | 520  | 0 < 60  | Male   | M0 | NX | Stage II  |
| TCGA-G3-A6 | 671  | 0 >= 60 | Male   | M0 | N0 | Stage III |
| TCGA-G3-A7 | 447  | 0 >= 60 | Male   | MX | NX | Stage I   |
| TCGA-G3-A7 | 632  | 0 >= 60 | Female | MX | NX | Stage I   |
| TCGA-G3-A7 | 361  | 0 >= 60 | Male   | MX | NX | Stage I   |
| TCGA-G3-A7 | 430  | 0 < 60  | Male   | MX | NX | Stage I   |
| TCGA-G3-A7 | 56   | 1 >= 60 | Male   | MX | NX | Stage III |
| TCGA-G3-A7 | 476  | 0 < 60  | Male   | M0 | N0 | Stage I   |
| TCGA-G3-A7 | 359  | 1 < 60  | Male   | M0 | N0 | Stage III |
| TCGA-G3-A7 | 412  | 0 < 60  | Female | M0 | N0 | Stage II  |
| TCGA-G3-A7 | 354  | 0 >= 60 | Male   | M0 | N0 | Stage II  |
| TCGA-GJ-A5 | 879  | 0 < 60  | Male   | MX | NX | Stage I   |
| TCGA-GJ-A6 | 31   | 1 >= 60 | Female | MX | NX | Stage II  |
| TCGA-GJ-A6 | 67   | 1 >= 60 | Male   | MX | N0 | Stage I   |
| TCGA-HP-A5 | 91   | 1 >= 60 | Male   | M0 | NX | Stage I   |
| TCGA-K7-A5 | 519  | 0 >= 60 | Male   | MX | NX | Stage I   |
| TCGA-K7-A6 | 512  | 0 >= 60 | Male   | MX | N0 | Stage I   |
| TCGA-K7-A7 | 359  | 0 >= 60 | Male   | MX | NX | Stage II  |
| TCGA-KR-A7 | 65   | 1 >= 60 | Male   | M0 | N0 | Stage I   |
| TCGA-KR-A7 | 829  | 0 >= 60 | Male   | M0 | N0 | Stage I   |
| TCGA-KR-A7 | 951  | 0 >= 60 | Female | M0 | N0 | Stage II  |
| TCGA-KR-A7 | 906  | 0 < 60  | Male   | M0 | N0 | Stage I   |
| TCGA-LG-A6 | 387  | 0 >= 60 | Female | M0 | NX | Stage II  |
| TCGA-LG-A6 | 425  | 0 < 60  | Male   | M0 | NX | Stage I   |
| TCGA-MI-A7 | 291  | 0 >= 60 | Male   | M0 | N0 | Stage I   |
| TCGA-MI-A7 | 507  | 0 >= 60 | Male   | M0 | N0 | Stage III |
| TCGA-MI-A7 | 698  | 0 >= 60 | Male   | M0 | N0 | Stage II  |
| TCGA-MI-A7 | 747  | 0 >= 60 | Male   | MX | NX | NA        |
| TCGA-MI-A7 | 630  | 0 >= 60 | Male   | MX | NX | NA        |
| TCGA-MR-A5 | 229  | 0 < 60  | Male   | MX | NX | Stage I   |
| TCGA-NI-A4 | 1791 | 1 >= 60 | Male   | MX | NX | Stage III |
| TCGA-NI-A5 | 799  | 0 >= 60 | Male   | MX | NX | Stage I   |
| TCGA-O8-A7 | 538  | 0 < 60  | Male   | MX | NX | Stage I   |
| TCGA-QA-A7 | 94   | 0 < 60  | Male   | MX | NX | Stage II  |
| TCGA-RC-A6 | 0    | 0 < 60  | Male   | M0 | N0 | Stage II  |
| TCGA-RC-A7 | 640  | 0 < 60  | Female | M0 | N0 | Stage I   |
| TCGA-RC-A7 | 588  | 0 < 60  | Male   | M0 | N0 | Stage II  |
| TCGA-RC-A7 | 579  | 0 >= 60 | Male   | M0 | N0 | Stage I   |
| TCGA-RC-A7 | 468  | 0 < 60  | Male   | M0 | N0 | Stage II  |
| TCGA-RC-A7 | 472  | 0 < 60  | Male   | M0 | N0 | Stage I   |
| TCGA-T1-A6 | 23   | 0 >= 60 | Male   | M0 | NX | NA        |
| TCGA-UB-A7 | 848  | 0 >= 60 | Female | M0 | N0 | Stage II  |
| TCGA-UB-A7 | 601  | 0 < 60  | Male   | MX | NX | Stage II  |
| TCGA-UB-A7 | 500  | 0 < 60  | Male   | MX | N0 | Stage III |
| TCGA-UB-A7 | 52   | 1 >= 60 | Male   | MX | N0 | Stage I   |
| TCGA-UB-A7 | 486  | 0 < 60  | Male   | MX | NX | Stage I   |
| TCGA-UB-A7 | 327  | 0 >= 60 | Male   | MX | NX | Stage II  |

|                        |      |        |        |    |    |           |
|------------------------|------|--------|--------|----|----|-----------|
| TCGA-UB-A <sup>A</sup> | 314  | 0 ≥ 60 | Female | MX | NX | Stage I   |
| TCGA-WJ-A <sup>E</sup> | 345  | 0 ≥ 60 | Female | MX | NX | Stage I   |
| TCGA-WQ-A <sup>C</sup> | 30   | 0 ≥ 60 | Female | MO | NX | NA        |
| TCGA-WQ-A <sup>E</sup> | 395  | 0 ≥ 60 | Male   | MO | NX | Stage II  |
| TCGA-WX-A <sup>A</sup> | 615  | 0 ≥ 60 | Female | MX | NX | Stage I   |
| TCGA-WX-A <sup>A</sup> | 556  | 1 < 60 | Female | MX | NX | Stage III |
| TCGA-XR-A <sup>E</sup> | 1339 | 0 < 60 | Female | MX | NX | Stage I   |
| TCGA-XR-A <sup>E</sup> | 1030 | 0 < 60 | Female | MO | NO | Stage III |
| TCGA-XR-A <sup>E</sup> | 925  | 0 < 60 | Male   | MX | NO | Stage III |
| TCGA-XR-A <sup>E</sup> | 693  | 1 ≥ 60 | Male   | MX | NX | Stage I   |
| TCGA-XR-A <sup>E</sup> | 898  | 0 < 60 | Male   | MO | NX | Stage I   |
| TCGA-ZP-A <sup>C</sup> | 1088 | 1 < 60 | Male   | MX | NX | NA        |
| TCGA-ZP-A <sup>C</sup> | 782  | 0 ≥ 60 | Female | MX | NX | NA        |
| TCGA-ZP-A <sup>C</sup> | 21   | 0 < 60 | Female | MX | NX | NA        |
| TCGA-ZP-A <sup>C</sup> | 395  | 0 ≥ 60 | Female | MX | NX | NA        |
| TCGA-ZS-A <sup>C</sup> | 1386 | 1 ≥ 60 | Male   | MX | NX | Stage II  |
| TCGA-ZS-A <sup>C</sup> | 2412 | 0 ≥ 60 | Male   | MX | NX | Stage II  |
| TCGA-ZS-A <sup>C</sup> | 341  | 0 < 60 | Male   | MX | NX | Stage II  |

| T  | prior_malitreathment_treatment_BMI |     |                  | MGAT5     | NEU1      | ALG3      |
|----|------------------------------------|-----|------------------|-----------|-----------|-----------|
| T2 | No                                 | No  | PharmaceutFat    | 3.4152889 | 7.3568997 | 7.9721426 |
| T2 | No                                 | No  | PharmaceutFat    | 3.9529244 | 7.5321163 | 9.262683  |
| T1 | No                                 | No  | PharmaceutFat    | 1.5814119 | 7.2548912 | 7.860752  |
| T1 | No                                 | No  | Radiation Fat    | 3.0921634 | 6.9718995 | 8.5260676 |
| T2 | No                                 | No  | Radiation Fat    | 2.5789976 | 7.0874138 | 8.5666414 |
| T3 | No                                 | No  | Radiation Fat    | 1.7469388 | 10.847243 | 9.0428312 |
| T1 | No                                 | No  | PharmaceutFat    | 2.2070146 | 6.3800537 | 8.3105203 |
| T1 | No                                 | No  | Radiation Nonfat | 5.1225249 | 7.722981  | 8.9234338 |
| T2 | No                                 | No  | PharmaceutFat    | 2.6221498 | 7.2433433 | 8.1323108 |
| T1 | No                                 | No  | Radiation Fat    | 1.5992016 | 6.4245228 | 8.9495214 |
| T1 | No                                 | No  | Radiation Fat    | 3.331385  | 7.6555157 | 8.3590205 |
| T1 | Yes                                | No  | Radiation Fat    | 2.5659475 | 7.3780826 | 8.623997  |
| T1 | Yes                                | No  | Radiation Fat    | 2.0180756 | 6.9128447 | 8.3087478 |
| T1 | No                                 | Yes | PharmaceutNonfat | 2.3864987 | 9.3066608 | 9.0790935 |
| T1 | No                                 | No  | Radiation Fat    | 3.1078226 | 6.6015877 | 8.4111512 |
| T3 | No                                 | Yes | PharmaceutFat    | 2.3664364 | 8.3307542 | 9.2708223 |
| T2 | Yes                                | No  | Radiation Fat    | 2.4940902 | 7.8254723 | 9.0392465 |
| T2 | No                                 | No  | PharmaceutFat    | 2.4956997 | 6.4239039 | 8.8822506 |
| T2 | No                                 | No  | PharmaceutFat    | 3.0009654 | 6.9943336 | 10.031099 |
| T3 | No                                 | No  | PharmaceutFat    | 3.6102858 | 7.1337621 | 8.0167214 |
| T2 | No                                 | No  | PharmaceutFat    | 3.0275396 | 7.1398026 | 8.4564819 |
| T2 | No                                 | No  | Radiation NA     | 1.3611565 | 6.2898697 | 7.576955  |
| T3 | No                                 | No  | Radiation NA     | 1.8823335 | 6.181717  | 7.3727828 |
| T3 | No                                 | No  | Radiation NA     | 2.9077923 | 6.9325026 | 8.1772531 |
| T4 | No                                 | No  | Radiation NA     | 2.5903931 | 6.7542272 | 9.4046669 |
| T2 | No                                 | No  | PharmaceutNA     | 1.6617765 | 6.1736044 | 7.438944  |
| T4 | No                                 | No  | Radiation NA     | 1.4220445 | 6.5689489 | 7.6019264 |
| T3 | No                                 | No  | PharmaceutNA     | 1.4976002 | 6.5277601 | 7.1709197 |
| T4 | No                                 | No  | PharmaceutFat    | 3.4867922 | 6.9197059 | 9.2323048 |
| T1 | No                                 | No  | PharmaceutNA     | 5.0030876 | 8.3832802 | 9.4458942 |
| T1 | Yes                                | Yes | PharmaceutFat    | 2.1643801 | 6.4549882 | 7.6726862 |
| T3 | No                                 | No  | PharmaceutFat    | 2.9276844 | 7.1163207 | 7.9283577 |
| T2 | No                                 | No  | PharmaceutFat    | 4.1507519 | 8.6658936 | 8.9142863 |
| T1 | No                                 | NA  | Radiation Nonfat | 2.0181277 | 8.6134839 | 8.6787527 |
| T3 | Yes                                | No  | Radiation Fat    | 3.5626798 | 6.5677763 | 9.626766  |
| T2 | No                                 | No  | PharmaceutFat    | 2.6421849 | 7.6562848 | 9.3590951 |
| T1 | No                                 | No  | Radiation Fat    | 1.6122214 | 7.0456879 | 8.2761958 |
| T2 | No                                 | No  | Radiation Fat    | 1.74637   | 7.7661801 | 8.1589146 |
| T1 | No                                 | No  | PharmaceutFat    | 3.562597  | 8.2735775 | 8.8012247 |
| T2 | Yes                                | No  | Radiation Fat    | 4.0210378 | 7.0624441 | 8.4253502 |
| T3 | No                                 | No  | Radiation NA     | 3.1506506 | 7.4756057 | 9.2885448 |
| T2 | No                                 | No  | Radiation NA     | 2.6788098 | 8.2942092 | 8.5613838 |
| T4 | No                                 | No  | Radiation Nonfat | 6.3137536 | 8.3926965 | 9.2726433 |
| T2 | No                                 | No  | PharmaceutNonfat | 4.8183717 | 8.8931303 | 8.6007873 |
| T4 | No                                 | No  | PharmaceutFat    | 2.9755097 | 7.9600961 | 9.2482847 |
| T3 | No                                 | No  | PharmaceutFat    | 2.7690697 | 9.086411  | 9.2510778 |
| T3 | No                                 | No  | PharmaceutNA     | 1.6908969 | 7.3870139 | 8.6461045 |
| T3 | No                                 | No  | PharmaceutFat    | 3.9532533 | 7.8194387 | 9.4992048 |
| T3 | No                                 | No  | Radiation Fat    | 5.3355096 | 7.282927  | 8.8367524 |
| T3 | No                                 | No  | Radiation Nonfat | 3.6891798 | 7.8132519 | 9.0563587 |

|    |     |     |                  |            |            |            |
|----|-----|-----|------------------|------------|------------|------------|
| T3 | No  | No  | Radiation Fat    | 2. 6539515 | 7. 9351224 | 8. 6586581 |
| T4 | No  | No  | PharmaceutFat    | 2. 2073794 | 8. 3771827 | 8. 9773797 |
| T3 | No  | No  | Radiation Fat    | 2. 941327  | 7. 2034415 | 9. 4054895 |
| T3 | No  | No  | PharmaceutFat    | 2. 3181486 | 7. 3972284 | 8. 3130262 |
| T3 | No  | No  | PharmaceutNonfat | 3. 0755609 | 6. 7971181 | 9. 085063  |
| T2 | No  | No  | Radiation Nonfat | 4. 3939218 | 7. 8083171 | 9. 4334055 |
| T3 | No  | No  | PharmaceutFat    | 3. 2661412 | 7. 5257825 | 8. 9484854 |
| T3 | No  | No  | PharmaceutFat    | 3. 0599269 | 8. 9216405 | 8. 7382344 |
| T3 | No  | No  | Radiation Fat    | 2. 8112272 | 7. 5502244 | 8. 5337092 |
| T3 | No  | No  | PharmaceutNonfat | 2. 9436395 | 9. 5996642 | 9. 014392  |
| T2 | No  | No  | PharmaceutFat    | 2. 4646462 | 6. 7899535 | 8. 8475185 |
| T3 | No  | NA  | PharmaceutFat    | 5. 4042886 | 7. 8690699 | 7. 5936034 |
| T2 | No  | No  | Radiation Fat    | 2. 384544  | 6. 6789266 | 8. 0633219 |
| T3 | No  | Yes | PharmaceutFat    | 3. 1156384 | 6. 9147577 | 9. 1351591 |
| T3 | No  | Yes | Radiation Fat    | 1. 5587079 | 5. 9491671 | 7. 3160016 |
| T2 | No  | No  | Radiation Fat    | 3. 5476179 | 8. 2206327 | 8. 7639954 |
| T1 | No  | NA  | PharmaceutFat    | 3. 2906754 | 8. 3698715 | 8. 2668904 |
| T1 | No  | No  | Radiation Fat    | 2. 3895044 | 6. 4495332 | 7. 6505329 |
| T1 | No  | No  | Radiation Fat    | 2. 9558818 | 6. 3857037 | 9. 1555889 |
| T1 | No  | No  | Radiation Fat    | 3. 2656642 | 7. 235121  | 8. 9460458 |
| T2 | No  | No  | Radiation Fat    | 3. 0201362 | 7. 2602497 | 8. 7723313 |
| T1 | No  | No  | Radiation Fat    | 3. 2947145 | 7. 5501541 | 8. 2768088 |
| T1 | No  | No  | Radiation Fat    | 4. 3901693 | 8. 03686   | 9. 2620727 |
| T3 | No  | No  | Radiation Fat    | 3. 3783994 | 8. 5201903 | 8. 9467881 |
| T1 | No  | Yes | PharmaceutFat    | 2. 9438469 | 7. 9683845 | 9. 207937  |
| T3 | No  | No  | Radiation Fat    | 3. 5441211 | 8. 4911915 | 9. 0489757 |
| T1 | No  | NA  | Radiation Fat    | 1. 9125839 | 6. 1806522 | 7. 6845407 |
| T1 | No  | No  | Radiation Fat    | 2. 6263265 | 9. 2580625 | 9. 2662022 |
| T4 | No  | Yes | PharmaceutFat    | 2. 7619069 | 8. 3039072 | 8. 8837829 |
| T2 | No  | No  | PharmaceutNonfat | 2. 28372   | 7. 9459325 | 9. 1852007 |
| T2 | No  | Yes | Radiation Fat    | 1. 3662281 | 6. 4712674 | 8. 7409562 |
| T1 | No  | No  | PharmaceutFat    | 3. 0150818 | 7. 9335731 | 9. 0016151 |
| T1 | No  | No  | Radiation Fat    | 2. 1254321 | 8. 8840155 | 9. 2517478 |
| T2 | No  | NA  | PharmaceutFat    | 1. 4359588 | 6. 1810222 | 7. 5075511 |
| T3 | No  | No  | PharmaceutFat    | 2. 8312089 | 7. 4097403 | 8. 7801114 |
| T1 | No  | No  | Radiation Fat    | 1. 5139403 | 6. 0377675 | 6. 8204208 |
| T3 | No  | No  | Radiation Nonfat | 1. 517344  | 7. 3924974 | 8. 7340956 |
| T3 | No  | No  | PharmaceutFat    | 2. 7943114 | 6. 7460061 | 9. 7342808 |
| T2 | Yes | No  | Radiation Fat    | 1. 9621796 | 7. 1843929 | 8. 370848  |
| T4 | No  | NA  | PharmaceutFat    | 3. 0041865 | 8. 6446792 | 8. 9227472 |
| T1 | No  | No  | PharmaceutFat    | 3. 9790789 | 7. 5518724 | 8. 7098835 |
| T1 | No  | Yes | Radiation Fat    | 2. 7864495 | 7. 1406511 | 7. 9924188 |
| T3 | No  | No  | PharmaceutFat    | 2. 3492212 | 8. 3991552 | 8. 4446209 |
| T3 | No  | Yes | PharmaceutFat    | 4. 5707411 | 9. 5331984 | 8. 6866679 |
| T2 | Yes | No  | Radiation Fat    | 2. 165927  | 6. 6973086 | 8. 0675827 |
| T2 | No  | No  | PharmaceutFat    | 3. 533169  | 8. 2838849 | 8. 7219527 |
| T1 | No  | No  | PharmaceutFat    | 2. 8667623 | 6. 7982647 | 7. 5850999 |
| T1 | No  | No  | Radiation Fat    | 3. 1427694 | 8. 6089657 | 9. 33713   |
| T1 | No  | No  | PharmaceutFat    | 4. 2926224 | 7. 6182918 | 8. 0812092 |
| T1 | No  | No  | PharmaceutFat    | 1. 5837224 | 7. 0076038 | 7. 5086423 |
| T2 | No  | Yes | PharmaceutFat    | 3. 4208148 | 8. 4299587 | 8. 6875277 |



|    |     |     |                  |           |           |           |
|----|-----|-----|------------------|-----------|-----------|-----------|
| T1 | No  | No  | PharmaceutFat    | 3.6945031 | 7.8960791 | 9.0868639 |
| T1 | No  | Yes | PharmaceutFat    | 3.4558418 | 7.612016  | 8.1842333 |
| T3 | No  | No  | PharmaceutFat    | 3.1361182 | 6.935584  | 8.2492142 |
| T1 | No  | No  | Radiation Fat    | 3.1907799 | 6.4003609 | 8.0401941 |
| T1 | No  | No  | PharmaceutFat    | 1.5597024 | 8.1162029 | 7.2155423 |
| T3 | No  | No  | Radiation Nonfat | 3.127348  | 6.740436  | 7.5256368 |
| T1 | No  | No  | Radiation Fat    | 4.1657856 | 8.8355229 | 8.6802943 |
| T1 | No  | No  | Radiation Fat    | 2.4843549 | 6.6621087 | 8.3229586 |
| T1 | No  | No  | Radiation Nonfat | 2.5258284 | 7.249516  | 9.3961071 |
| T1 | No  | No  | Radiation Fat    | 2.5441766 | 9.17724   | 8.9457972 |
| T1 | No  | No  | Radiation Fat    | 2.4710889 | 6.6414788 | 7.7235635 |
| T1 | No  | No  | Radiation Fat    | 3.8649467 | 8.1104278 | 8.7343173 |
| T1 | No  | No  | Radiation Fat    | 2.382687  | 9.1040334 | 8.5669997 |
| T1 | No  | No  | PharmaceutFat    | 2.4529576 | 7.1289237 | 8.3949593 |
| T1 | No  | No  | PharmaceutNonfat | 1.719517  | 7.4520582 | 8.5050869 |
| T1 | No  | No  | Radiation Fat    | 3.2859836 | 6.8194388 | 8.4081734 |
| T2 | No  | No  | Radiation Fat    | 2.2978542 | 8.2591905 | 8.8783707 |
| T1 | No  | No  | PharmaceutFat    | 2.7275632 | 7.578593  | 9.0409174 |
| T1 | No  | No  | PharmaceutFat    | 2.845918  | 7.7119303 | 8.8380917 |
| T1 | No  | No  | Radiation Nonfat | 2.7277165 | 6.3611202 | 8.1686695 |
| T1 | No  | No  | PharmaceutFat    | 3.4524055 | 7.9836375 | 8.6641128 |
| T1 | No  | No  | PharmaceutFat    | 2.2998022 | 8.373933  | 8.6645976 |
| T1 | No  | No  | PharmaceutFat    | 3.3242014 | 8.2105127 | 9.0045052 |
| T1 | No  | No  | Radiation Fat    | 3.4215208 | 7.8690181 | 8.7994547 |
| T2 | No  | Yes | PharmaceutFat    | 3.2865898 | 9.075734  | 8.6467728 |
| T1 | No  | No  | Radiation Fat    | 2.1635401 | 7.147905  | 8.5357109 |
| T1 | No  | No  | Radiation Fat    | 2.9987242 | 8.8355363 | 9.5036206 |
| T1 | No  | No  | PharmaceutFat    | 2.1578519 | 8.1017313 | 8.7251341 |
| T1 | No  | No  | Radiation Fat    | 3.1286024 | 7.2464353 | 8.4434063 |
| T1 | No  | No  | Radiation Fat    | 3.0301649 | 8.2856161 | 8.2497249 |
| T1 | No  | No  | PharmaceutFat    | 5.2223255 | 8.2866709 | 9.6710356 |
| T3 | No  | No  | PharmaceutFat    | 2.5832732 | 7.8825698 | 8.6120879 |
| T1 | No  | No  | Radiation Fat    | 2.2322601 | 7.7820848 | 8.4054515 |
| T1 | No  | No  | PharmaceutFat    | 2.5471326 | 8.3559274 | 9.26429   |
| T1 | No  | No  | Radiation Fat    | 2.0173376 | 6.9972166 | 9.1380105 |
| T1 | No  | No  | Radiation Fat    | 1.1118341 | 9.2384247 | 9.1253753 |
| T1 | No  | No  | PharmaceutFat    | 1.530955  | 7.3131811 | 9.0756796 |
| T3 | No  | No  | PharmaceutFat    | 1.9903826 | 7.7577998 | 8.5454494 |
| T1 | No  | No  | PharmaceutFat    | 2.6859746 | 6.9138218 | 9.1946275 |
| T1 | No  | No  | Radiation Fat    | 1.9925474 | 7.1565873 | 8.500796  |
| T2 | No  | No  | PharmaceutFat    | 2.5961461 | 7.1198029 | 8.5960668 |
| T1 | No  | No  | PharmaceutFat    | 2.9669364 | 8.6091519 | 9.1560206 |
| T2 | No  | No  | PharmaceutFat    | 2.8258817 | 6.8882845 | 8.7753907 |
| T1 | No  | No  | PharmaceutFat    | 1.62552   | 7.6288244 | 9.7655507 |
| T1 | No  | No  | Radiation Fat    | 1.3642492 | 8.093886  | 8.8946406 |
| T1 | No  | No  | PharmaceutFat    | 2.486253  | 7.0295787 | 8.1237695 |
| T1 | No  | No  | Radiation Fat    | 2.1894021 | 6.8771795 | 8.9817326 |
| T1 | No  | No  | PharmaceutNonfat | 1.2271376 | 6.1305359 | 8.1741104 |
| T2 | No  | No  | PharmaceutFat    | 1.8585004 | 7.1307141 | 8.4039301 |
| T1 | Yes | No  | PharmaceutFat    | 3.2734351 | 7.4739714 | 8.4839088 |
| T1 | No  | No  | PharmaceutNonfat | 3.5908543 | 8.6212254 | 8.3065702 |

|    |     |     |                  |           |           |           |
|----|-----|-----|------------------|-----------|-----------|-----------|
| T3 | No  | No  | Radiation Fat    | 3.8278419 | 8.8104227 | 9.4933075 |
| T1 | No  | No  | PharmaceutFat    | 1.6826113 | 7.6646237 | 9.5023164 |
| T1 | No  | No  | Radiation Fat    | 2.0405598 | 7.1275236 | 8.6469327 |
| T1 | No  | No  | Radiation Fat    | 1.8219027 | 6.7683637 | 8.0608331 |
| T1 | No  | No  | PharmaceutFat    | 1.7144509 | 6.1766678 | 7.6716622 |
| T1 | Yes | No  | Radiation Fat    | 2.0087961 | 6.2720201 | 7.5074978 |
| T1 | No  | No  | PharmaceutFat    | 1.9981393 | 8.7639941 | 9.5951359 |
| T1 | No  | No  | Radiation Fat    | 1.0870722 | 6.5175147 | 7.7967817 |
| T1 | No  | No  | PharmaceutFat    | 2.8458993 | 7.1780903 | 7.8507078 |
| T1 | No  | No  | PharmaceutFat    | 2.4272761 | 7.9485742 | 8.4191357 |
| T1 | No  | No  | PharmaceutFat    | 2.5321379 | 6.6968015 | 8.9687992 |
| T1 | No  | No  | PharmaceutFat    | 2.8219205 | 7.5865556 | 8.6511386 |
| T1 | No  | No  | Radiation Fat    | 3.2622031 | 7.8718869 | 9.4015143 |
| T2 | No  | No  | PharmaceutFat    | 3.1247335 | 7.773218  | 8.9102644 |
| T2 | No  | Yes | PharmaceutFat    | 2.3079032 | 6.6608463 | 8.1029917 |
| T3 | No  | No  | Radiation Fat    | 1.875862  | 8.0417281 | 8.6748277 |
| T1 | No  | No  | PharmaceutFat    | 2.1299774 | 6.8425016 | 8.6353274 |
| T1 | No  | No  | Radiation Fat    | 2.920875  | 7.3816879 | 8.8318539 |
| T3 | No  | No  | Radiation Fat    | 2.1569984 | 7.1436422 | 8.1322228 |
| T1 | No  | Yes | Radiation Fat    | 2.3241212 | 8.4177725 | 8.8006034 |
| T2 | No  | Yes | Radiation Nonfat | 3.4669778 | 8.2738465 | 9.3001514 |
| T2 | No  | No  | PharmaceutNonfat | 2.7995273 | 7.1573599 | 7.9221877 |
| T2 | No  | No  | PharmaceutFat    | 4.7495581 | 7.9584692 | 8.2489446 |
| T3 | No  | No  | PharmaceutFat    | 3.4826613 | 8.1379295 | 9.1551803 |
| T2 | No  | NA  | PharmaceutNonfat | 5.1346779 | 8.7409918 | 8.9604114 |
| T2 | No  | No  | Radiation Nonfat | 2.2033026 | 7.0641175 | 8.4935226 |
| T2 | No  | No  | Radiation Nonfat | 1.6016169 | 9.1519397 | 9.6545148 |
| T2 | No  | No  | PharmaceutFat    | 2.9242191 | 7.6876069 | 8.6329856 |
| T3 | No  | No  | Radiation Nonfat | 5.9490572 | 8.2359644 | 9.2845518 |
| T1 | No  | No  | Radiation NA     | 2.1416027 | 6.9687082 | 8.9007415 |
| T1 | No  | No  | Radiation Nonfat | 1.8297151 | 6.8526455 | 7.9247758 |
| T3 | No  | Yes | Radiation NA     | 3.0033876 | 8.8895891 | 8.3149745 |
| T1 | No  | No  | Radiation Fat    | 1.4695347 | 7.715033  | 7.9311883 |
| T1 | No  | No  | Radiation NA     | 2.9043237 | 8.0711498 | 8.5212685 |
| T1 | Yes | No  | PharmaceutFat    | 2.6679396 | 7.0989914 | 8.6616826 |
| T3 | No  | No  | Radiation Fat    | 1.4101584 | 6.4112192 | 7.2121345 |
| T1 | No  | NA  | PharmaceutFat    | 2.0963982 | 6.8737155 | 8.6693657 |
| T2 | No  | No  | PharmaceutNA     | 2.6345915 | 7.1954809 | 8.6845836 |
| T1 | No  | No  | Radiation NA     | 2.6445519 | 7.1232738 | 9.2351898 |
| T1 | No  | No  | Radiation NA     | 3.303679  | 7.936831  | 9.3135964 |
| T2 | No  | No  | Radiation NA     | 4.7035447 | 8.7893517 | 8.7284301 |
| T2 | Yes | No  | Radiation NA     | 2.9362221 | 7.8033779 | 8.8163855 |
| T1 | Yes | Yes | PharmaceutNA     | 3.1146282 | 8.6997234 | 9.2982469 |
| T1 | No  | No  | Radiation Fat    | 3.4056415 | 7.7706108 | 8.3239697 |
| T2 | No  | NA  | Radiation Fat    | 2.5836967 | 6.5959892 | 8.6237111 |
| T1 | No  | NA  | PharmaceutFat    | 2.942345  | 7.8571681 | 7.6688915 |
| T1 | No  | NA  | PharmaceutNA     | 2.3566035 | 7.9966465 | 9.0265792 |
| T2 | No  | No  | Radiation Fat    | 3.3148954 | 9.0958242 | 8.7720403 |
| T1 | No  | No  | Radiation Fat    | 3.4094394 | 7.8445751 | 9.2256107 |
| T1 | No  | No  | Radiation Fat    | 2.5889125 | 7.3281984 | 8.2841976 |
| T3 | No  | Yes | PharmaceutFat    | 2.4986952 | 6.5384704 | 8.1097955 |

|    |     |     |                  |            |            |            |
|----|-----|-----|------------------|------------|------------|------------|
| T2 | No  | Yes | Radiation Fat    | 1. 3148424 | 7. 1375388 | 7. 5156922 |
| T1 | No  | No  | PharmaceutFat    | 2. 6463841 | 7. 1932763 | 8. 2011883 |
| T2 | No  | No  | PharmaceutFat    | 2. 0446744 | 7. 4292766 | 8. 8446063 |
| T1 | No  | No  | Radiation Fat    | 3. 5229424 | 7. 3117836 | 8. 6318197 |
| T2 | No  | No  | PharmaceutFat    | 2. 7487246 | 7. 1756972 | 8. 443181  |
| T3 | Yes | No  | PharmaceutFat    | 3. 0517188 | 8. 252589  | 8. 4936191 |
| T1 | No  | No  | Radiation Fat    | 2. 2555289 | 7. 2142002 | 8. 013227  |
| T1 | No  | No  | Radiation Fat    | 5. 5328306 | 8. 1543003 | 8. 4949927 |
| T1 | No  | No  | PharmaceutFat    | 2. 9390115 | 7. 0517371 | 8. 8623548 |
| T1 | No  | No  | Radiation NA     | 2. 4040887 | 6. 9081286 | 7. 9970082 |
| T3 | Yes | No  | Radiation Fat    | 3. 5859879 | 8. 3710299 | 9. 517592  |
| T1 | No  | No  | Radiation Fat    | 1. 559774  | 6. 5677454 | 7. 9652431 |
| T4 | No  | No  | Radiation Fat    | 3. 0534035 | 7. 7037918 | 8. 3783943 |
| T2 | No  | No  | PharmaceutFat    | 2. 515732  | 8. 1197927 | 8. 5683725 |
| T2 | No  | Yes | Radiation Fat    | 2. 6503837 | 7. 2341127 | 8. 951551  |
| T1 | No  | No  | PharmaceutFat    | 3. 7206425 | 7. 8292976 | 8. 9114132 |
| T2 | No  | No  | Radiation Fat    | 2. 4472893 | 8. 564825  | 8. 6162701 |
| T1 | No  | No  | Radiation Fat    | 3. 1593253 | 7. 7737482 | 8. 5894887 |
| T1 | No  | No  | PharmaceutFat    | 3. 0322023 | 7. 0415511 | 8. 4174294 |
| T1 | No  | No  | Radiation Fat    | 3. 2886727 | 7. 5466726 | 8. 9296028 |
| T1 | No  | No  | PharmaceutFat    | 2. 6680499 | 7. 1933806 | 8. 940963  |
| T2 | No  | Yes | PharmaceutNA     | 4. 8239719 | 7. 8054053 | 8. 8008517 |
| T1 | Yes | No  | PharmaceutFat    | 2. 6196983 | 7. 7287376 | 8. 5390835 |
| T1 | No  | No  | PharmaceutFat    | 2. 5988968 | 7. 3246897 | 8. 2565048 |
| T2 | Yes | No  | Radiation Fat    | 3. 4490809 | 7. 8226643 | 9. 1350883 |
| T1 | No  | No  | Radiation Fat    | 2. 5578558 | 8. 935936  | 9. 2485964 |
| T2 | Yes | No  | PharmaceutFat    | 2. 1244779 | 7. 7126295 | 8. 8816142 |
| T1 | No  | No  | PharmaceutFat    | 2. 0634672 | 7. 5479941 | 8. 083448  |
| T1 | No  | No  | PharmaceutFat    | 2. 2702902 | 7. 1023545 | 8. 7849307 |
| T4 | No  | No  | PharmaceutFat    | 2. 7983344 | 7. 4114112 | 8. 4264546 |
| T2 | No  | No  | PharmaceutFat    | 2. 9503509 | 7. 3938911 | 8. 7306629 |
| NA | Yes | No  | Radiation Fat    | 2. 0112412 | 7. 8976577 | 8. 5365488 |
| T2 | No  | No  | Radiation Fat    | 2. 3301635 | 8. 972222  | 8. 7742331 |
| T1 | No  | No  | PharmaceutFat    | 1. 9901619 | 6. 9388678 | 7. 6497411 |
| T3 | No  | Yes | Radiation Fat    | 1. 8794183 | 7. 1941882 | 7. 9267769 |
| T1 | No  | No  | PharmaceutFat    | 2. 5877693 | 7. 5524498 | 8. 1393562 |
| T1 | No  | No  | Radiation Fat    | 2. 7232862 | 7. 9368026 | 8. 7791463 |
| T2 | No  | No  | PharmaceutFat    | 3. 0275331 | 7. 6135469 | 9. 2517462 |
| T2 | No  | NA  | Radiation NA     | 2. 6746084 | 8. 2064779 | 8. 9354053 |
| T1 | No  | No  | PharmaceutFat    | 3. 1312919 | 7. 5426729 | 8. 2268153 |
| T2 | No  | No  | Radiation Fat    | 1. 944984  | 7. 7506822 | 8. 8575827 |
| T1 | No  | No  | Radiation Fat    | 2. 6675483 | 6. 6149375 | 8. 1939496 |
| T2 | No  | Yes | PharmaceutFat    | 3. 9838806 | 7. 974018  | 10. 233022 |
| T1 | No  | No  | Radiation Fat    | 4. 4943414 | 7. 2152838 | 8. 4919018 |
| T1 | Yes | NA  | PharmaceutNonfat | 1. 7244905 | 7. 8349653 | 8. 7446491 |
| T2 | No  | No  | Radiation Fat    | 3. 1207826 | 8. 4604161 | 8. 1388439 |
| T2 | No  | No  | Radiation Nonfat | 3. 2652564 | 7. 4958212 | 8. 0177942 |
| T3 | No  | Yes | Radiation Fat    | 3. 1368015 | 7. 8245263 | 8. 8209842 |
| T1 | No  | No  | PharmaceutNonfat | 3. 4508154 | 8. 1992878 | 9. 7587473 |
| T1 | No  | No  | PharmaceutFat    | 3. 1605361 | 7. 3669271 | 8. 7434371 |
| T2 | No  | Yes | Radiation Fat    | 3. 6138882 | 8. 3824897 | 8. 367474  |

|    |     |     |                  |           |           |           |
|----|-----|-----|------------------|-----------|-----------|-----------|
| NA | Yes | No  | PharmaceutNonfat | 2.6967626 | 6.1783923 | 7.3812689 |
| T1 | No  | No  | PharmaceutFat    | 3.6407037 | 7.6457224 | 9.2095788 |
| T3 | No  | No  | Radiation Fat    | 3.7348542 | 8.9909427 | 8.9879561 |
| T2 | No  | No  | Radiation Fat    | 2.6442044 | 7.1445119 | 8.263863  |
| T1 | No  | Yes | Radiation Fat    | 3.7638894 | 8.66163   | 8.9152671 |
| T3 | No  | Yes | PharmaceutFat    | 3.1069872 | 7.1503087 | 9.0591112 |
| T1 | Yes | No  | PharmaceutFat    | 2.3723622 | 7.9059185 | 7.8390228 |
| T3 | No  | No  | PharmaceutFat    | 2.6957726 | 8.7153143 | 8.891761  |
| T3 | No  | No  | Radiation Nonfat | 2.2013745 | 8.3917124 | 8.672818  |
| T1 | No  | No  | PharmaceutFat    | 1.7353432 | 6.5729243 | 8.6707556 |
| T1 | Yes | No  | PharmaceutFat    | 3.0401068 | 7.5991823 | 8.3148673 |
| T1 | No  | No  | Radiation Nonfat | 3.2094424 | 7.7804377 | 8.5352745 |
| T1 | No  | No  | PharmaceutFat    | 3.1240529 | 7.0147418 | 8.3228409 |
| T1 | Yes | No  | Radiation Fat    | 3.4042191 | 6.7568364 | 8.6344414 |
| T1 | No  | No  | Radiation Fat    | 2.0505005 | 7.5090541 | 8.3562382 |
| T2 | No  | No  | PharmaceutNA     | 2.8384277 | 7.569872  | 8.7007319 |
| T2 | No  | No  | Radiation NA     | 4.4369324 | 7.7016006 | 8.858204  |
| T2 | No  | No  | PharmaceutFat    | 1.9083111 | 6.7544697 | 7.9620947 |

| OGT        | PIGC       | PL0D3      | B3GAT3     | B3GNT3     | B3GNT5     | RPN2       | B4GALNT1   |
|------------|------------|------------|------------|------------|------------|------------|------------|
| 7. 5096169 | 7. 4094009 | 10. 081509 | 8. 4081267 | 7. 17353   | 3. 7295314 | 10. 183334 | 4. 3055143 |
| 7. 8435518 | 7. 7611868 | 10. 723022 | 8. 1194851 | 7. 4023653 | 4. 9367983 | 11. 049203 | 5. 4134502 |
| 7. 0997096 | 7. 4178208 | 9. 5384986 | 6. 3825832 | 5. 242286  | 4. 6955604 | 10. 72037  | 2. 8112221 |
| 7. 6758094 | 7. 4648919 | 10. 721653 | 7. 3973234 | 7. 1403892 | 4. 1218098 | 10. 197543 | 6. 1156206 |
| 7. 4997461 | 7. 2477359 | 9. 142387  | 7. 4061187 | 4. 4352398 | 3. 931899  | 10. 082802 | 2. 1604164 |
| 6. 7790553 | 8. 033923  | 9. 669478  | 7. 8176663 | 5. 9871154 | 7. 5093051 | 10. 704826 | 3. 5368467 |
| 5. 2980128 | 6. 2309536 | 9. 4688685 | 7. 5772612 | 5. 0786261 | 3. 1542859 | 9. 3140374 | 3. 9361497 |
| 9. 7137403 | 8. 5397513 | 11. 020574 | 7. 1374259 | 8. 2961323 | 5. 3003562 | 10. 44268  | 2. 7371259 |
| 6. 4085035 | 6. 7469145 | 9. 2475484 | 7. 1216632 | 7. 356737  | 3. 6558188 | 10. 09843  | 2. 5814238 |
| 6. 5960675 | 7. 0449299 | 9. 8617454 | 8. 0251854 | 3. 4112311 | 3. 8054152 | 9. 3472966 | 3. 5114799 |
| 7. 1738695 | 7. 8878127 | 10. 512171 | 7. 1694018 | 7. 7448449 | 4. 5888921 | 10. 501227 | 2. 4916426 |
| 7. 1190045 | 7. 0538869 | 9. 4999107 | 6. 7953974 | 7. 1484954 | 5. 4331872 | 10. 228441 | 4. 5613932 |
| 6. 7613883 | 7. 9313545 | 9. 2814657 | 6. 320859  | 3. 3827507 | 3. 6835868 | 10. 019253 | 2. 2930343 |
| 6. 5674969 | 7. 5206719 | 10. 343206 | 6. 9592764 | 5. 5689087 | 5. 4772019 | 10. 929722 | 2. 2083594 |
| 6. 4136632 | 6. 8652641 | 10. 521386 | 7. 414096  | 5. 1584159 | 3. 4573741 | 10. 18052  | 5. 2422913 |
| 6. 1742275 | 7. 6068969 | 10. 306695 | 7. 0896543 | 3. 3672103 | 3. 1644453 | 9. 9904703 | 5. 4325168 |
| 7. 0282514 | 7. 735558  | 9. 0368122 | 7. 2428906 | 4. 1769655 | 5. 6735702 | 10. 033679 | 5. 4010233 |
| 8. 0168103 | 7. 7597311 | 10. 401114 | 6. 7401877 | 5. 4523907 | 3. 5575203 | 10. 821876 | 2. 7602417 |
| 6. 3120516 | 8. 1379901 | 10. 170394 | 7. 0505741 | 8. 7553034 | 5. 7558276 | 10. 464138 | 2. 7318353 |
| 6. 9416014 | 7. 3552224 | 9. 1371824 | 6. 4352266 | 6. 1942967 | 4. 5100178 | 9. 4219368 | 3. 2123689 |
| 6. 4052831 | 6. 9856843 | 9. 9585271 | 6. 3415208 | 5. 6856655 | 4. 5825715 | 10. 234792 | 3. 7764126 |
| 6. 1201055 | 5. 8126711 | 8. 2120435 | 5. 830761  | 4. 4062375 | 3. 9906734 | 9. 2762127 | 2. 1805196 |
| 5. 7255859 | 5. 8656954 | 8. 16943   | 5. 8714269 | 4. 4845206 | 5. 4628061 | 9. 4780661 | 2. 1044554 |
| 5. 7079976 | 6. 6782015 | 9. 6159186 | 6. 6044291 | 6. 6686771 | 3. 7787282 | 9. 6175457 | 2. 1099713 |
| 6. 5389266 | 7. 6335904 | 8. 90666   | 6. 288129  | 3. 5929262 | 4. 6414424 | 9. 87711   | 2. 3327982 |
| 5. 7311449 | 5. 9785644 | 8. 2387065 | 5. 9984968 | 6. 6766156 | 3. 9436599 | 9. 3552429 | 2. 2015248 |
| 5. 8017361 | 6. 2388847 | 8. 5041898 | 6. 3375154 | 5. 6086988 | 4. 7000155 | 9. 1282523 | 2. 323227  |
| 6. 0165402 | 6. 3139258 | 7. 9553294 | 5. 6139452 | 4. 9117069 | 3. 8864938 | 9. 0473405 | 2. 1613812 |
| 6. 7609639 | 8. 008421  | 9. 6299449 | 7. 4804241 | 4. 1920506 | 5. 7375632 | 10. 305588 | 3. 5744483 |
| 7. 0031679 | 8. 0789887 | 9. 6705511 | 7. 9886282 | 3. 5736497 | 6. 7383871 | 10. 498544 | 2. 3463326 |
| 5. 6089014 | 6. 5887719 | 8. 8987007 | 6. 7860477 | 5. 1087065 | 4. 9602595 | 9. 2672718 | 2. 5117543 |
| 7. 961497  | 7. 632165  | 9. 5334158 | 7. 4734115 | 7. 6888162 | 6. 855074  | 9. 9792586 | 2. 4227968 |
| 7. 0842425 | 9. 5108668 | 9. 7067841 | 7. 5477676 | 7. 5726317 | 4. 8001045 | 10. 96577  | 5. 2414001 |
| 6. 666209  | 7. 3416823 | 10. 738726 | 7. 3312342 | 5. 5129402 | 5. 7681612 | 10. 451359 | 2. 5433985 |
| 6. 0191316 | 8. 0039437 | 10. 537145 | 7. 9601129 | 7. 427671  | 4. 9940961 | 10. 031271 | 2. 5458391 |
| 4. 8718637 | 6. 7505936 | 8. 9735524 | 7. 7700412 | 8. 9798313 | 3. 5005968 | 10. 934241 | 3. 0161531 |
| 5. 8188781 | 6. 8742838 | 9. 0550616 | 6. 4013662 | 3. 3675843 | 3. 3096535 | 9. 6886075 | 2. 4404628 |
| 5. 8779186 | 6. 7007739 | 9. 0338275 | 7. 3277692 | 4. 5892896 | 5. 8599798 | 10. 297824 | 2. 1543359 |
| 8. 3616774 | 7. 3388384 | 10. 495771 | 7. 4853307 | 6. 6974712 | 6. 5058358 | 10. 677035 | 3. 0462196 |
| 6. 5174923 | 7. 1295589 | 9. 5095779 | 6. 5020028 | 7. 3740618 | 4. 8714953 | 9. 9881885 | 4. 2881125 |
| 6. 5037389 | 7. 7466278 | 8. 7348673 | 7. 3889899 | 6. 9950098 | 4. 8757842 | 10. 702644 | 4. 1142382 |
| 7. 826523  | 9. 5054511 | 9. 9245785 | 6. 0568718 | 8. 3064877 | 3. 9322415 | 10. 231649 | 2. 1658859 |
| 8. 2138963 | 9. 202871  | 11. 138912 | 7. 2751704 | 11. 840873 | 6. 0949276 | 10. 877315 | 5. 2813774 |
| 8. 1135997 | 9. 3371954 | 10. 019826 | 6. 4578955 | 9. 3514058 | 6. 9882714 | 11. 497129 | 2. 6775642 |
| 5. 922036  | 7. 9718923 | 10. 40034  | 7. 7482665 | 4. 820134  | 4. 0757824 | 10. 312528 | 2. 9107764 |
| 7. 9335768 | 8. 3764503 | 11. 662977 | 6. 2064494 | 9. 5436163 | 4. 5140848 | 10. 941794 | 4. 4648819 |
| 5. 5834242 | 6. 9900134 | 8. 0475045 | 6. 8614345 | 4. 3531641 | 3. 3591668 | 10. 56714  | 2. 1648494 |
| 7. 8796797 | 8. 9956051 | 10. 522646 | 7. 9056728 | 6. 7360382 | 5. 7868844 | 10. 919786 | 2. 9005958 |
| 7. 8774864 | 9. 1492543 | 11. 132838 | 7. 2187219 | 6. 5059947 | 5. 436805  | 10. 498269 | 5. 0314845 |
| 6. 899443  | 7. 6775557 | 10. 313834 | 7. 4914188 | 8. 3273068 | 5. 8463323 | 10. 403345 | 4. 8935353 |

5. 9998634 7. 7717489 10. 486805 7. 2624434 4. 3889136 3. 7006671 10. 855346 2. 801202  
6. 9705027 8. 272269 10. 703247 8. 4982999 8. 570193 4. 5854335 10. 505504 4. 4589974  
7. 7818423 7. 6562209 9. 8686981 7. 2596268 5. 9218798 4. 3369757 10. 734453 2. 8287595  
6. 6922013 7. 3650053 9. 6296184 8. 0560564 6. 0818108 4. 6299216 9. 9168308 2. 7502655  
6. 4222938 7. 8322301 9. 522357 7. 7781523 5. 640021 3. 2875684 11. 677197 2. 7446754  
7. 8152435 7. 931573 11. 838623 7. 7151222 3. 5771385 7. 2853751 10. 754904 6. 944344  
7. 0958375 8. 1267567 9. 3465986 6. 6323377 4. 2942791 4. 0439108 10. 395314 3. 8855859  
5. 9321472 7. 6822428 10. 446056 7. 3056509 3. 6244589 3. 2331303 10. 811747 2. 1793856  
7. 2200597 9. 0520278 10. 56943 7. 5374299 6. 2519205 6. 9494437 10. 921737 2. 6124326  
7. 0725981 8. 4532151 11. 148588 6. 9969675 7. 1967091 5. 2829117 10. 852942 3. 9271252  
7. 4119275 7. 1924348 9. 9019911 7. 0883831 3. 6801569 3. 5759393 9. 5970494 2. 4144532  
7. 669793 7. 4659339 10. 553647 7. 94075 3. 3434909 4. 1786274 9. 9394621 2. 6416127  
6. 3138261 6. 6601568 9. 0172505 6. 5361816 5. 4240333 4. 8899575 10. 039475 2. 1821743  
5. 9701895 6. 7533584 9. 2613679 8. 6266564 5. 227834 3. 7268284 10. 627186 3. 88546  
5. 8959182 6. 3156259 8. 3673465 5. 6014735 4. 4636017 3. 2840643 9. 2803187 2. 2282928  
6. 1005994 7. 9724992 10. 700141 7. 1778169 6. 7535418 5. 192298 11. 548026 2. 6962193  
6. 4776929 6. 62342 10. 574656 7. 3698399 3. 6557008 4. 4499597 10. 559415 2. 7359836  
5. 8526481 6. 1298878 9. 227084 5. 9844632 6. 487426 3. 5516844 9. 4122107 2. 2055089  
6. 8747884 7. 9114839 9. 8878698 7. 2885335 3. 3641376 3. 9971763 10. 983496 2. 5437044  
6. 0939491 7. 1445921 11. 03406 6. 7577964 7. 2531479 6. 5940747 10. 241901 4. 7664842  
8. 2938532 8. 5117298 9. 9590324 6. 5468171 5. 4813419 4. 2467851 10. 170368 4. 3173775  
6. 8379243 7. 2863769 10. 046924 7. 0620456 6. 5455398 3. 7088204 10. 255875 6. 8963811  
7. 4453721 7. 8779961 10. 752132 7. 1416086 11. 780438 5. 992895 10. 546054 2. 5589601  
8. 2041776 8. 8012932 10. 781186 6. 6579655 3. 8294378 4. 2811669 10. 316067 5. 1750699  
5. 9002463 7. 993547 10. 242383 7. 3986936 7. 0459427 3. 8241437 10. 670204 4. 4723581  
6. 8593642 9. 2432022 10. 944017 6. 1016048 6. 3765569 6. 3707472 10. 880423 2. 2478108  
5. 5340338 6. 0695539 8. 5805422 5. 8409711 4. 6922316 3. 5534783 9. 5384665 2. 2154876  
6. 8600268 8. 3704156 10. 149408 7. 1068003 5. 3717589 3. 4812583 11. 071785 2. 1629205  
5. 6573209 7. 9418916 10. 384894 7. 6920812 6. 6193471 4. 5083166 10. 75795 2. 7049536  
7. 8991565 8. 4112733 8. 9954169 8. 1258141 5. 8158029 5. 2133889 11. 194847 4. 8800016  
5. 9327978 7. 4741852 9. 1838279 7. 3366751 3. 3911052 3. 2652499 10. 027778 4. 1905971  
5. 788887 6. 3917903 9. 4751958 6. 9733652 8. 4316481 3. 2540566 9. 852307 4. 0481636  
6. 1243006 6. 927397 9. 8429156 8. 896595 7. 6573057 4. 9958111 9. 8443804 5. 0918861  
5. 6452039 6. 1712543 8. 573948 6. 3745344 3. 9880125 3. 0767042 8. 8115765 2. 2335439  
5. 9608639 7. 0307778 10. 230941 8. 2904944 6. 5767833 4. 2969204 10. 057714 4. 7809102  
5. 4754269 6. 1546909 7. 6810448 5. 6117333 4. 3374851 3. 0360888 8. 6779051 2. 1157122  
5. 9320712 7. 1879618 9. 5966196 5. 7506446 4. 4181033 4. 5572424 10. 731031 3. 6173002  
5. 0027005 7. 3514781 10. 07927 7. 7323611 5. 5778623 3. 0881682 10. 40909 3. 4790279  
6. 0016553 7. 6032488 9. 8616417 6. 5215459 6. 1564079 3. 626461 9. 999937 2. 2457228  
5. 8472523 8. 3212812 10. 306469 7. 6208632 9. 1522525 4. 5839388 10. 73485 2. 6033969  
7. 5590559 7. 4728495 10. 309497 7. 1255505 7. 7274189 5. 1863137 10. 360847 3. 6613292  
7. 8333419 8. 1746786 9. 0286789 6. 3362913 5. 0226333 5. 1034316 10. 396284 2. 622307  
7. 7943268 8. 6090642 10. 958905 7. 2980153 8. 5269654 4. 3649612 10. 334759 4. 9120293  
8. 2465656 9. 2895117 11. 334474 7. 6000762 8. 0618774 8. 1727149 11. 416798 5. 2170271  
6. 9346716 6. 8334174 9. 4484624 6. 4654217 3. 4525142 3. 3456853 9. 9137967 3. 7769266  
8. 0338875 8. 1401995 10. 98216 7. 9317206 6. 7263543 5. 9284877 10. 857349 5. 6699087  
6. 5311622 6. 1570574 8. 8796526 6. 1098819 7. 6465182 3. 8121642 9. 430081 3. 2622653  
7. 1157584 9. 5246567 10. 822208 6. 4591009 5. 8620607 4. 5363125 10. 958349 2. 2255313  
7. 5420028 7. 7200987 10. 546382 7. 3026293 5. 5039989 3. 6584952 10. 818738 5. 2202152  
6. 2453386 6. 5932644 8. 974462 6. 463455 3. 981651 3. 4368075 9. 7253103 2. 2121065  
6. 8712695 7. 728596 10. 511939 7. 9385996 7. 6936288 6. 322014 10. 589853 4. 315055

7. 9299161 7. 3754369 10. 0663 7. 6043584 8. 9719526 4. 1507098 10. 807384 5. 4508626  
7. 8530641 7. 8673251 10. 202373 6. 9911039 7. 7429772 4. 67376 9. 7679125 2. 9491643  
7. 9111892 6. 8612522 10. 93054 7. 3029617 4. 411453 5. 5126576 10. 357754 2. 4483473  
7. 596109 6. 6882802 9. 2960065 7. 140107 3. 7445114 3. 6184919 9. 5426214 3. 0958735  
6. 3640045 8. 0454408 9. 8006701 7. 1816279 4. 1086907 5. 0996895 10. 16844 2. 2306108  
6. 6306048 6. 2721418 9. 9277136 6. 3246554 5. 6871888 3. 2810144 10. 49974 3. 3037477  
6. 9017364 7. 8860245 10. 390496 7. 1760544 4. 2117011 3. 8393206 10. 566771 4. 2148054  
6. 2914562 7. 1178865 9. 942491 7. 261984 3. 4130731 5. 3109204 10. 444909 2. 381633  
5. 5128986 7. 0424607 10. 041359 7. 4640372 6. 9109556 3. 3967908 10. 159799 3. 7742061  
7. 7155793 8. 9377972 9. 5652856 7. 2592121 4. 5241409 3. 9609157 10. 476559 4. 6650457  
5. 4799401 6. 7085961 9. 3630004 6. 290053 6. 043318 3. 330177 9. 3221547 3. 613756  
7. 2443791 7. 7411421 10. 931316 7. 0327351 5. 3617769 4. 0049092 10. 341465 2. 3479932  
7. 6032202 7. 7116208 8. 6865045 6. 9174184 5. 2796747 3. 6635695 10. 779019 3. 3193184  
6. 8287266 7. 4322673 9. 1553541 6. 1665189 5. 3854282 3. 1824861 10. 313711 2. 5274072  
6. 4137006 6. 7958885 10. 012198 7. 2448756 5. 8306652 4. 3498587 9. 397514 3. 3241335  
7. 2398065 7. 5797067 10. 603836 7. 2148846 5. 619824 4. 727795 9. 87308 2. 4611248  
5. 9100133 7. 8514624 9. 3483601 7. 5953074 6. 1921741 3. 1376039 9. 8091546 4. 1971781  
6. 9129566 7. 4682653 9. 7472142 6. 6347693 4. 0004899 3. 8708849 10. 340194 3. 5278195  
7. 3271533 8. 8700518 10. 336838 7. 2179252 7. 5745656 6. 4444647 10. 032038 2. 3181375  
5. 7569321 7. 3457537 8. 2691366 6. 7446346 5. 708947 4. 5207625 10. 53101 3. 3953683  
7. 2750475 7. 9066651 10. 391423 7. 7466574 5. 3197793 5. 4530804 10. 750576 6. 637264  
6. 4822746 7. 666011 10. 380223 6. 8098497 8. 2930761 4. 4635697 10. 01952 6. 4047994  
7. 0482209 7. 7967026 10. 569496 8. 1534278 8. 4840164 4. 3103357 10. 308994 2. 7744587  
7. 0897906 7. 2904113 10. 205616 6. 5506949 3. 4562379 4. 6710183 10. 778363 2. 0932375  
7. 0824682 8. 3028319 10. 253491 7. 7754522 7. 5988931 3. 9088441 10. 088616 5. 0448709  
5. 9867939 7. 5748761 10. 66906 7. 2130838 6. 7818377 4. 0277021 10. 235258 4. 1214433  
7. 7998577 7. 8056394 9. 7339024 7. 6086558 3. 5994388 4. 1683071 11. 216623 3. 0897895  
6. 6462052 8. 442436 10. 559893 6. 5441067 3. 5369596 3. 3982585 10. 820289 2. 5550892  
7. 0688726 6. 8216521 9. 9910127 7. 2996958 7. 3878299 3. 556178 10. 33879 4. 0582016  
6. 4484728 7. 4404364 10. 321526 6. 6256074 7. 3657464 6. 5165455 10. 168694 2. 3905121  
7. 0681847 9. 1423417 10. 891276 7. 6334053 9. 1653766 6. 2230611 10. 493276 6. 1764002  
7. 2296876 7. 3647054 9. 4633467 6. 8033731 4. 0718097 4. 2562713 10. 101274 3. 3562008  
8. 1075555 7. 8381837 9. 1376868 6. 1341522 6. 8905383 6. 2750655 9. 5760424 2. 4375213  
7. 1213781 8. 3654985 10. 563963 6. 7009889 3. 6014607 5. 2772259 11. 115965 2. 4788668  
8. 1043724 8. 316562 9. 9134808 7. 806248 6. 251149 4. 7856574 10. 50452 6. 4010939  
6. 9817369 8. 1440312 10. 659626 7. 2993517 3. 6066336 3. 4181123 11. 347305 2. 7981674  
5. 9099359 7. 6979576 8. 9445772 8. 0526157 3. 3699152 3. 2562169 9. 7380872 3. 6091487  
6. 9529325 7. 5412688 10. 234894 6. 9773239 3. 5486767 3. 2909071 9. 9777906 2. 1424959  
6. 6140252 9. 0137738 10. 997173 6. 9189538 5. 5759226 3. 7414555 10. 536835 2. 240761  
5. 4338793 7. 6389722 9. 2960457 6. 2254795 5. 9772073 4. 3882707 9. 7047797 2. 3413888  
6. 3905284 7. 879658 9. 7523553 7. 5009852 7. 1655244 5. 0523752 10. 328375 2. 7052327  
7. 8828614 7. 7636857 10. 337909 7. 9427693 4. 9866449 6. 7061445 10. 360521 2. 5077283  
5. 3838297 7. 2704707 10. 483372 7. 0839806 5. 079143 3. 8851817 9. 6078464 2. 7219795  
4. 882697 6. 3912169 9. 1206485 8. 0400764 7. 141908 2. 9714877 10. 112652 3. 8445442  
5. 4231804 7. 3799342 8. 772703 6. 7182157 4. 6664807 3. 1145024 10. 262175 2. 5141385  
6. 9082267 7. 6030487 9. 5199718 7. 0030767 4. 5640815 5. 1893754 10. 291021 2. 1551069  
6. 404727 7. 4204094 9. 21763 7. 373967 3. 5210073 4. 3332454 9. 979114 3. 4620248  
4. 6894038 6. 2137063 8. 8765992 6. 6750948 4. 4131505 3. 0286915 9. 3534032 3. 874312  
6. 514739 7. 5732093 9. 5088133 6. 768807 5. 8383308 4. 7012249 9. 6655179 3. 4645748  
7. 0687901 7. 6834978 10. 329929 7. 5160971 5. 4614959 3. 5309898 10. 301275 3. 5521825  
7. 5916068 9. 3349796 10. 860559 6. 9757286 8. 3838843 6. 5573857 11. 032798 2. 633096

5. 9781964 9. 158359 10. 245887 8. 021401 10. 00487 4. 3394231 11. 283198 2. 8291995  
6. 8115128 8. 4590328 9. 5822661 6. 3582905 7. 2720981 3. 6449234 9. 665946 2. 1403617  
6. 8158632 7. 0161484 9. 3123744 7. 108142 3. 5411592 4. 4339992 10. 200281 2. 1977454  
5. 3984873 6. 6910592 8. 7370538 6. 7461259 3. 4358352 3. 4952052 9. 7166501 2. 6950121  
5. 5203287 6. 9922318 8. 4839763 6. 4283972 3. 3434909 3. 3309244 9. 4081473 2. 1270583  
5. 8935826 6. 3339468 8. 2593391 5. 8410458 5. 4655911 3. 04271 9. 2825709 2. 3135719  
6. 9129932 8. 5261671 10. 628408 6. 7439482 4. 0863922 3. 3125976 10. 232032 3. 2948016  
6. 4094275 7. 189782 8. 8688107 6. 1471958 3. 3773251 3. 3387208 8. 7264881 2. 1520237  
8. 6254344 8. 4064478 9. 3437916 8. 0651378 9. 6456066 4. 9680727 9. 1582838 2. 1457248  
7. 3413668 7. 4330656 9. 7521983 7. 2851333 4. 0379953 4. 0811197 9. 9574865 3. 8120596  
5. 6558491 6. 0909857 10. 45039 7. 1854824 4. 7117168 3. 3239149 9. 9823262 6. 2769102  
7. 2092305 8. 7040509 10. 750425 6. 9307119 7. 5890167 3. 315966 10. 287054 2. 3609555  
7. 5719804 8. 8596187 9. 8918798 6. 6353248 8. 8197941 4. 8572286 10. 099486 2. 4128109  
6. 8342409 8. 3234621 10. 902911 7. 5759438 6. 5914356 6. 945737 10. 584579 6. 0675815  
6. 50166 6. 5619605 10. 080494 6. 4835973 5. 2723198 3. 6680229 9. 1620182 2. 505941  
7. 8371492 7. 8315717 9. 8415562 6. 7633157 3. 4421488 3. 4805374 9. 7916389 2. 8128917  
7. 4504686 8. 4434398 9. 3193635 5. 9075871 7. 100857 3. 3161952 10. 431131 2. 1713889  
7. 3425008 7. 8900712 10. 178039 7. 0030038 8. 2434089 7. 2552188 10. 246793 3. 3179681  
7. 2419599 7. 2767711 8. 9876809 5. 829946 5. 4542573 3. 4343971 9. 6663823 2. 2887532  
7. 3161759 7. 9067116 10. 058702 6. 7434756 4. 0945492 3. 726931 9. 3508837 2. 6475337  
7. 347475 7. 1996436 11. 460144 7. 6518253 9. 09754 7. 1575644 10. 548452 3. 8772946  
6. 9674 6. 8563496 9. 3958078 6. 1265388 6. 3153772 4. 2011241 10. 00277 2. 9583246  
8. 7454125 9. 0652895 9. 984647 7. 1149166 5. 8224651 5. 2767963 10. 737895 3. 4454239  
7. 4227525 8. 4255991 10. 5073 7. 2688091 9. 1885249 4. 9634916 10. 674731 2. 9735577  
7. 5235132 7. 8425903 10. 433107 8. 3004909 10. 015034 6. 1097641 11. 071985 4. 1753783  
6. 8721994 9. 0123173 10. 67145 5. 3833767 6. 4356389 4. 1470842 9. 2446355 2. 1629828  
6. 21876 8. 5383477 9. 8089489 7. 0499044 6. 7730947 3. 5569609 10. 546176 3. 1687166  
7. 6765305 7. 7279886 10. 18659 7. 2499455 5. 7671958 4. 9478492 10. 280399 4. 8303345  
8. 4017649 8. 7300161 10. 448717 6. 784696 9. 7472251 5. 1989543 10. 665612 4. 0614315  
6. 863743 7. 5427987 9. 9039056 6. 4304582 3. 3434909 3. 6864185 10. 016209 2. 8942171  
7. 0452256 8. 162467 10. 187847 7. 2655468 3. 4079408 3. 5991164 9. 8154002 2. 3091038  
6. 731321 7. 5937334 11. 003755 7. 4443406 7. 5009208 5. 3078016 9. 8811912 4. 7915936  
5. 9479887 7. 9082177 8. 7870096 6. 4439027 3. 7567247 4. 0072557 9. 6988785 2. 0958346  
7. 7791598 7. 7616978 10. 118169 7. 1519058 6. 231143 3. 3622879 9. 9850494 3. 7774627  
6. 0879124 7. 718232 10. 892844 7. 4945259 5. 9492228 3. 6766641 10. 324561 4. 4245488  
5. 2471994 5. 8498899 8. 2941371 5. 7054196 4. 8234488 3. 2020265 9. 3321699 2. 1325462  
4. 5943831 6. 8993825 9. 3655277 7. 7446544 4. 1273525 4. 3608043 9. 9088804 4. 6778061  
7. 6056309 7. 5733006 9. 8597295 6. 7555124 6. 438877 5. 5432629 10. 837176 2. 2284324  
6. 3014419 7. 3924089 10. 014223 6. 8685445 6. 260817 3. 2152931 10. 142336 2. 8987853  
6. 1831012 8. 5898783 10. 58283 8. 2422144 7. 608992 6. 1156071 10. 61281 2. 3301  
7. 6861624 8. 111364 11. 333276 7. 9130275 9. 9635449 5. 5249839 10. 950351 2. 5331772  
7. 013168 7. 5418022 10. 68695 7. 5508962 7. 8316387 3. 4661873 10. 667823 6. 650809  
7. 0217224 7. 7490386 11. 527424 7. 7284001 3. 3434909 6. 5004617 10. 73881 2. 3157997  
6. 3217114 7. 6449561 9. 4624762 7. 0413213 7. 5830631 5. 8436208 10. 829055 3. 7285314  
5. 6006235 7. 1195101 9. 9110521 7. 8894075 6. 0784871 3. 1693528 9. 5236709 2. 721475  
7. 0778591 7. 5811236 9. 3196863 7. 4433809 6. 3451773 6. 757188 10. 871629 2. 3071811  
7. 6586025 7. 3891011 9. 4884744 7. 7967999 3. 6912333 5. 1971352 11. 40066 2. 1852122  
5. 8581818 8. 2337925 10. 816632 7. 025906 9. 1054893 5. 7574868 10. 710654 2. 974892  
7. 5509041 9. 1861885 10. 533454 6. 6586936 8. 2434024 6. 2025831 10. 957572 2. 3100381  
5. 9339222 7. 0597709 9. 7959276 6. 4350447 5. 6025584 3. 7905905 9. 9655833 3. 1744602  
6. 6077851 7. 0572666 10. 187843 7. 3664943 5. 0534222 5. 9332514 9. 7943833 2. 6635661



5. 132919 6. 9783673 9. 3885388 6. 2391066 3. 3434909 3. 4827936 8. 82851 2. 0873843  
6. 7492431 7. 6138915 9. 4469223 6. 540912 3. 4211044 3. 5579299 10. 161353 3. 3000439  
5. 653942 7. 9256395 9. 9252981 7. 0100705 4. 4089667 3. 9979733 10. 500231 2. 1847454  
7. 4945079 7. 7370593 10. 927067 6. 9530135 9. 1184063 4. 1885464 10. 962036 2. 4350432  
6. 4333076 7. 6702268 10. 18085 7. 0885655 5. 8862244 6. 1858645 10. 225941 4. 9777046  
6. 9158669 7. 8468125 10. 273293 6. 3844586 3. 3722231 3. 2024095 9. 7655631 3. 1595436  
5. 8521625 6. 9489109 10. 376916 6. 9835272 3. 4081754 3. 072857 9. 6501302 2. 07352  
8. 3237977 9. 2881408 11. 220859 7. 4753728 9. 5080382 3. 4822986 11. 196188 4. 955809  
5. 9354995 6. 4634037 9. 7840557 7. 5630469 6. 2093487 5. 8216552 9. 9296463 6. 0868918  
6. 2481044 6. 2272049 9. 1457718 6. 276837 4. 5481091 4. 0270337 10. 209927 2. 173315  
8. 0130455 8. 8078592 10. 66691 7. 8456967 6. 6633049 5. 5271438 11. 10426 7. 3048302  
5. 7534382 6. 6786482 9. 2297825 7. 3453117 4. 0015537 4. 8393794 8. 7363642 2. 2163292  
8. 038541 7. 4637492 10. 498535 6. 6098573 4. 0079967 5. 4302418 10. 574868 4. 9605825  
7. 7680298 7. 5099629 9. 5647419 6. 6357256 3. 5688687 4. 0821069 10. 306731 3. 1278461  
6. 5088192 7. 9572964 10. 914939 7. 7861864 4. 6221565 3. 2856832 9. 9083513 2. 7575458  
7. 1655065 7. 5532559 10. 303905 7. 4565889 7. 1621937 6. 398255 10. 283256 4. 3129996  
6. 2775229 7. 911892 9. 8899913 7. 8280643 6. 8869753 6. 7000447 10. 83573 6. 7844306  
7. 5897414 7. 2415724 10. 867419 7. 4684811 4. 9939668 4. 7945329 10. 421103 3. 0738895  
7. 4485097 7. 6178494 9. 8062638 7. 2808504 5. 3652796 5. 2051324 10. 135846 5. 0929891  
8. 1492952 7. 237343 9. 8240527 7. 5251337 6. 6463214 4. 4083336 10. 415978 5. 0699411  
5. 5081808 7. 1533556 9. 9148003 7. 6359327 6. 3434247 3. 1723911 9. 8415785 3. 1204735  
8. 2898901 7. 9957113 10. 6361 8. 1732272 9. 6288995 5. 959694 10. 794174 4. 6157847  
7. 1685337 7. 907703 9. 5495159 6. 230286 6. 6271569 3. 6948265 10. 147316 3. 7578349  
6. 4562076 7. 4088373 10. 660629 6. 6438968 5. 330073 3. 3909358 9. 568318 2. 2400505  
5. 9471207 7. 6451288 10. 428494 7. 2382493 6. 9271608 3. 1604589 10. 144249 4. 4811701  
6. 6723212 7. 0732251 10. 151619 9. 0223073 7. 2041365 4. 1840798 10. 390894 3. 7395694  
6. 9762963 7. 4532634 10. 355125 8. 2256087 8. 5831173 5. 4817014 10. 991456 2. 3133922  
7. 272252 7. 8587554 10. 633768 7. 363741 4. 3280001 5. 1347564 10. 401326 2. 3206761  
6. 5432787 7. 7045246 9. 5011708 7. 3285585 8. 1836451 3. 6897333 9. 5865759 4. 0549256  
6. 3465917 7. 5323846 10. 432301 7. 3015258 4. 8505336 3. 5613598 9. 9144329 3. 9494381  
6. 1839042 7. 2947414 10. 485252 6. 8579973 3. 7420424 3. 7032117 10. 192703 3. 2910671  
5. 7639398 7. 7018155 9. 5004192 6. 77615 3. 3725096 3. 4422821 9. 7829601 2. 9735111  
6. 6881611 7. 3306988 10. 312123 7. 9312652 3. 6870334 6. 580674 10. 378973 2. 4323979  
6. 1072065 6. 5399574 8. 5660976 6. 0522574 3. 496789 3. 4644295 9. 8127443 2. 2277422  
6. 5871758 6. 7073701 9. 5538701 6. 6745872 6. 130331 3. 9437715 10. 130985 2. 1875565  
7. 4976415 6. 9054694 9. 5906615 7. 177042 5. 8890238 4. 7297008 9. 9397105 3. 0371939  
5. 6692746 7. 2538427 9. 9161062 7. 1203998 7. 1202442 3. 7757611 9. 9595084 4. 991712  
7. 6563104 8. 3357578 8. 9426232 7. 2824437 3. 9505237 8. 2195344 11. 167391 2. 5042589  
7. 1481399 7. 3770559 11. 317103 7. 2987189 9. 118197 6. 291943 10. 348638 3. 3079363  
6. 3081492 7. 7361413 9. 6530607 7. 4463554 8. 7321451 4. 4605798 9. 9660829 3. 3291117  
6. 1969579 7. 2976251 9. 8867506 8. 1090822 3. 9739337 4. 9313552 9. 7694801 3. 3862209  
6. 5177286 6. 7875393 10. 24435 7. 6148858 5. 748099 4. 309786 9. 5614167 2. 1538467  
7. 5197788 8. 7979911 10. 457136 8. 1980966 9. 1869961 4. 3354957 9. 5425993 2. 608239  
6. 1117998 6. 796625 10. 421196 7. 7341953 7. 500854 3. 032727 9. 8968737 3. 8693854  
6. 3613387 7. 1907386 10. 554264 7. 2960814 6. 2439125 5. 7162106 10. 197284 3. 0135298  
7. 1853148 8. 4925776 10. 535079 6. 3485738 7. 9735723 5. 9194427 10. 648356 4. 7234142  
7. 2776141 8. 3825273 11. 109498 6. 7775331 6. 2836143 6. 4687128 10. 657744 2. 2157411  
8. 1256816 7. 85712 9. 5335558 6. 0846585 5. 5059115 3. 5620561 10. 010055 3. 9167973  
6. 3974428 7. 7977256 10. 998198 7. 6086599 6. 3411315 4. 3397434 10. 322727 4. 9122675  
7. 3443541 7. 9395312 9. 7106633 6. 1720481 7. 907741 3. 2487389 11. 5375 2. 3099053  
7. 069263 8. 0806541 10. 889396 7. 3710844 7. 4187789 5. 0330646 10. 802186 6. 0903876

6.8223099 6.7878902 8.9579209 6.0349696 5.7569848 4.1090601 9.427799 2.4884796  
7.2562325 7.8456885 10.63944 8.3231607 7.6307839 7.1355526 10.134708 4.9796022  
8.482847 8.1206675 11.302068 8.1666901 9.249817 5.1742656 9.8390152 3.1557553  
6.2913486 6.979661 10.390018 7.2254232 6.6766124 5.4475033 9.8029459 6.4143936  
7.0864254 8.8144536 9.6468763 8.1330588 7.8326868 6.6605363 10.2466 5.4259614  
7.3198305 7.2610551 9.3215089 7.1742755 6.6676272 4.1800158 9.3346906 2.9001343  
7.5662485 8.7000985 10.399738 6.0642907 7.2771529 4.2179101 10.904835 2.3274631  
6.7268944 7.8430301 10.655875 7.6306214 5.2885401 7.2673871 10.653105 5.2087117  
7.3840103 7.488405 10.556027 6.5758399 7.4847694 6.0897305 9.7898595 2.1425303  
7.7915001 7.772304 9.6943651 6.2111135 3.3434909 3.6768817 9.7767249 2.376377  
7.1204315 7.6734652 9.8689755 6.8264452 6.2257155 6.5734788 10.486437 2.9812102  
6.5469819 7.9795208 10.013527 7.1505497 5.8198611 3.8138897 10.539894 5.6902157  
6.6059157 6.880904 9.7570563 6.8264751 5.6989683 4.5779878 10.004443 3.3529634  
8.0978123 7.8730537 11.225648 6.9157918 7.0845742 6.6791082 10.516669 5.3295299  
7.4120515 8.1860801 9.402763 6.8467056 3.4279888 3.4063461 9.5491798 4.1139825  
6.7665144 7.2168824 10.290492 7.7126249 4.5310954 5.2536358 10.283933 5.7239261  
7.3281689 8.0786878 9.091579 7.1067902 3.6059912 4.5352296 10.307284 4.3907108  
6.919977 7.3334775 9.5945776 6.4723025 4.1812762 4.3058987 9.6895115 2.3684507

| GLA       | ST3GAL6   | B4GALT3   | B4GALT7   | ST6GALNAC4GYS2 | STT3A     | DDOST               |
|-----------|-----------|-----------|-----------|----------------|-----------|---------------------|
| 8.8714327 | 3.316717  | 8.7034021 | 7.3712482 | 6.3861924      | 1.7369525 | 8.8162659 10.471106 |
| 9.2764926 | 6.5659163 | 7.8170292 | 7.93216   | 5.3949328      | 5.6920493 | 8.9837983 11.42548  |
| 8.9494012 | 5.9117266 | 7.3224872 | 7.1988966 | 5.2676725      | 4.5782173 | 9.5863059 10.981679 |
| 9.3591084 | 5.8026787 | 7.8370217 | 7.208229  | 6.7750752      | 5.5544617 | 8.6019046 10.510858 |
| 7.6905742 | 7.16118   | 7.5293575 | 7.3367378 | 4.5177915      | 7.985331  | 9.1640853 10.431496 |
| 9.4610646 | 5.3466087 | 7.7178753 | 7.0698499 | 6.2124518      | 3.7662996 | 9.5397308 11.102363 |
| 7.6018853 | 5.4653382 | 6.8441007 | 7.4888146 | 5.2163342      | 4.5309338 | 7.4127954 9.2735956 |
| 9.3955848 | 5.3750769 | 8.804238  | 7.6113438 | 6.5217853      | 5.226146  | 8.1925342 10.515913 |
| 8.6556741 | 4.3756059 | 7.5298259 | 8.0607655 | 5.7802475      | 1.6760079 | 8.453477 9.9724898  |
| 8.58221   | 6.4491866 | 7.4308052 | 7.4950686 | 4.4061769      | 6.7514115 | 8.1530837 9.7984669 |
| 7.712438  | 5.0810124 | 7.8659984 | 7.0929181 | 5.2936855      | 5.0032033 | 8.9918922 9.7985555 |
| 8.8458361 | 6.744543  | 8.0507647 | 8.2202246 | 5.3964981      | 3.838449  | 9.0603939 9.7063242 |
| 7.6868542 | 4.9161161 | 8.0333228 | 7.1129622 | 4.9961253      | 2.8775607 | 8.9901029 9.5523616 |
| 8.7511287 | 3.4609799 | 7.6383976 | 7.9670681 | 5.0626871      | 2.6751657 | 9.3296224 10.626192 |
| 8.25005   | 6.3298512 | 8.4152543 | 7.3521426 | 5.6311051      | 6.8121438 | 8.7757809 10.389837 |
| 7.7944667 | 6.4938477 | 8.0593524 | 7.4594447 | 4.8416119      | 6.8160005 | 8.8778371 10.400812 |
| 7.7434378 | 7.0899646 | 7.3674562 | 7.6293879 | 5.6324975      | 7.0737079 | 9.7494895 11.160755 |
| 8.6597204 | 6.3270264 | 8.867952  | 7.3358258 | 5.3770007      | 1.8081954 | 9.4596396 10.975435 |
| 9.4059939 | 5.3248231 | 7.987251  | 7.3883016 | 7.8600764      | 2.3384803 | 8.6042899 11.651322 |
| 8.8864074 | 6.0386524 | 7.0340775 | 6.5035826 | 7.1547509      | 5.4692716 | 7.9260778 10.320962 |
| 7.8264351 | 6.8617431 | 7.1083456 | 6.8154094 | 5.7527136      | 7.0805089 | 8.6590708 10.387893 |
| 6.9743012 | 7.3701366 | 6.4019541 | 5.9053551 | 3.5500026      | 7.7626205 | 7.9183105 9.4134571 |
| 6.803033  | 6.6665716 | 6.3520233 | 5.6182433 | 4.04364        | 7.3016632 | 7.5824613 9.0787502 |
| 7.2617785 | 6.665028  | 7.1900082 | 7.0539753 | 5.5261801      | 5.9363689 | 7.6660614 9.6600026 |
| 7.3168959 | 6.6984605 | 8.1099998 | 7.0062927 | 4.9119105      | 7.0498031 | 8.6977865 9.1740212 |
| 8.7300744 | 7.5615022 | 6.6203796 | 5.8489007 | 3.8128775      | 7.4785182 | 7.6544021 9.1851733 |
| 7.1786626 | 6.7848049 | 6.5998901 | 5.8998543 | 5.3778471      | 7.4261454 | 7.0163288 8.9020915 |
| 6.8802458 | 7.3269989 | 6.1740577 | 5.1826798 | 3.6958679      | 8.2052483 | 7.4472426 8.9298262 |
| 8.0708499 | 5.3112707 | 8.0427884 | 7.3053285 | 4.6180228      | 4.9788851 | 8.8243237 11.268709 |
| 7.9289204 | 6.5765246 | 7.6242875 | 7.2507559 | 4.9232809      | 5.768577  | 9.0185865 11.085658 |
| 7.6561087 | 6.6754754 | 7.1846892 | 6.2626215 | 5.4246104      | 6.787907  | 7.2856052 9.5513481 |
| 8.4356973 | 7.0090089 | 8.8598907 | 7.6766666 | 6.5113335      | 5.7715541 | 8.8392247 10.405256 |
| 8.7377699 | 6.2808881 | 8.6975102 | 7.3845191 | 5.0435038      | 2.0788905 | 9.3430325 11.345301 |
| 8.4240616 | 6.8058348 | 7.0720291 | 7.4347714 | 4.7350148      | 6.3571405 | 8.1341976 10.643144 |
| 8.1822271 | 6.1038993 | 8.0282299 | 7.1413707 | 4.4676493      | 3.4155007 | 8.6741003 10.205581 |
| 7.629034  | 5.2898531 | 8.1453933 | 7.9138415 | 5.6744576      | 2.6144666 | 8.1675995 10.587302 |
| 8.6702971 | 7.472098  | 7.766525  | 6.5498393 | 4.5209444      | 5.1624952 | 8.4236897 10.213639 |
| 7.5275096 | 6.7252709 | 6.6549594 | 7.2824167 | 4.4774456      | 5.8068842 | 8.0997234 10.490859 |
| 9.0882026 | 5.9079557 | 7.7742891 | 7.2566534 | 6.340633       | 5.2412483 | 9.006603 10.754181  |
| 8.5861127 | 6.612772  | 7.7120741 | 6.9025835 | 6.7099305      | 5.8074579 | 8.3687532 9.64168   |
| 8.696557  | 5.7445474 | 6.9598675 | 7.5388837 | 5.7530429      | 4.2599434 | 8.8784192 11.00246  |
| 8.3540015 | 5.087858  | 8.7681598 | 7.00836   | 5.7634512      | 1.8869195 | 9.8216175 10.418279 |
| 9.1101751 | 4.8132416 | 8.4468565 | 8.1472477 | 7.8261188      | 1.6140722 | 9.8961302 11.100538 |
| 8.6012567 | 6.3245944 | 8.7628597 | 7.4521135 | 6.9234751      | 3.5963616 | 10.205045 11.035349 |
| 9.5295436 | 6.0634234 | 8.4662212 | 7.1984158 | 6.4459556      | 3.959192  | 8.9879131 10.992052 |
| 10.026804 | 5.0929881 | 8.1448825 | 6.1228557 | 7.2418265      | 2.5915179 | 9.4672704 11.409363 |
| 7.8901935 | 3.1492094 | 6.8860164 | 7.5297807 | 5.2889913      | 1.9483916 | 8.5929383 8.8364802 |
| 10.055586 | 6.3462974 | 9.2320131 | 8.0493542 | 6.9858641      | 1.6862352 | 9.3814728 11.266583 |
| 8.8286684 | 4.7374336 | 9.6960456 | 7.8872833 | 6.6653892      | 3.6953689 | 9.6614622 10.826504 |
| 8.9730888 | 5.7973435 | 8.4905612 | 7.7977304 | 6.9137241      | 3.5370705 | 8.5301887 11.045961 |

10. 056838 6. 4239137 8. 3739848 6. 9369353 4. 9021306 3. 3136299 9. 2570825 10. 169521  
10. 722971 3. 4882403 8. 4088626 7. 9880532 5. 7243797 5. 322874 8. 8902276 11. 761104  
8. 6308564 5. 025804 8. 0410782 7. 0712569 5. 9569762 1. 7806036 9. 3090877 10. 486074  
7. 9608182 6. 6933777 6. 790288 6. 8684355 4. 174975 6. 2713426 8. 3888433 10. 117826  
8. 9395093 5. 2784495 7. 917941 7. 1491336 7. 1380504 1. 6297279 9. 7964359 11. 465943  
10. 655979 5. 542179 8. 6283867 7. 3833073 6. 9199823 1. 6025975 9. 3462105 11. 553368  
8. 5501476 4. 4737534 7. 9959171 6. 6989065 5. 5096435 3. 4330682 8. 6687322 11. 506591  
7. 8806899 6. 5404247 8. 0443316 7. 975658 3. 6750417 6. 156675 8. 9690855 10. 191255  
7. 0482955 6. 474734 8. 3381589 7. 1549243 5. 1283139 2. 5898865 10. 173901 10. 840139  
9. 1915956 4. 8012403 8. 02743 6. 9811681 6. 3944184 3. 9284502 8. 0156925 10. 688351  
9. 7378944 7. 67147 7. 5246324 6. 7089195 3. 8355543 6. 0654395 8. 8700761 9. 217496  
10. 196517 6. 1325924 7. 910576 7. 8979455 7. 6315879 1. 7066318 8. 6690047 10. 422202  
8. 0262578 6. 6138885 6. 6434415 6. 3151699 4. 5909086 6. 8438875 8. 2625786 10. 053356  
7. 9709396 6. 7900332 7. 2310765 8. 0742447 5. 0541606 6. 4770314 9. 7289089 10. 611342  
7. 2283849 7. 1110972 6. 2168678 5. 8891431 4. 2260444 7. 5821114 7. 8244134 9. 3629535  
9. 4204115 4. 701857 8. 1331319 7. 7385456 5. 1043097 1. 5993479 9. 859666 10. 845189  
8. 3089055 5. 9258382 8. 2203673 5. 8202702 5. 3720295 7. 2716434 7. 818749 10. 341826  
7. 0637042 6. 9831281 6. 3491488 6. 2714648 4. 6301154 7. 1548427 7. 7571899 9. 1685092  
7. 9368221 7. 53532 8. 2580636 6. 5495529 4. 8678138 6. 8322968 9. 2817828 9. 8052662  
7. 7158564 7. 0341154 7. 6658388 7. 5008883 5. 0945802 6. 7305418 9. 0495148 10. 155743  
9. 0305355 6. 9314046 8. 2743201 7. 4766909 5. 349038 5. 24306 9. 2649622 10. 79363  
7. 6516252 7. 7504378 7. 1118194 6. 7655077 4. 1718223 8. 4764458 9. 3336045 10. 307415  
10. 40731 6. 3002064 8. 6462475 7. 1879071 7. 4456614 2. 353942 9. 2037651 10. 683388  
10. 707966 6. 8568085 9. 0595154 7. 749275 5. 0609 4. 8387158 9. 2018881 10. 523805  
8. 8009314 5. 0411497 8. 2317098 7. 5624513 5. 8509998 4. 5511588 9. 02314 10. 777642  
7. 7682182 3. 6433524 8. 7507212 7. 3381789 4. 9773151 3. 222082 10. 007855 10. 519405  
6. 941588 6. 6696449 6. 2925061 5. 988049 4. 1878281 7. 4223407 8. 3467957 9. 595359  
8. 5914953 4. 887016 8. 2846462 7. 7767516 6. 2783389 2. 3239164 9. 3648236 10. 723406  
7. 8108954 6. 6150117 7. 8858777 7. 5049653 5. 727549 7. 2947889 9. 1981055 10. 686567  
11. 625374 6. 7583718 7. 8507746 7. 4200393 7. 0342139 2. 6423833 9. 8815531 11. 783797  
10. 196627 5. 997597 7. 7657594 7. 8294668 5. 2396241 3. 8272455 8. 2798838 9. 7105145  
8. 2975789 4. 9508116 8. 6496273 7. 8144779 6. 2941146 2. 7041034 7. 9822091 9. 4839437  
9. 3093332 3. 1304756 8. 2629439 8. 4031178 6. 3258045 3. 006431 9. 1518508 11. 071949  
6. 4579574 7. 7096898 6. 3074344 6. 1286698 3. 7427198 7. 4655108 7. 4650022 8. 9035971  
9. 2158731 5. 2176132 7. 6958665 7. 3580805 6. 3793856 3. 8124158 8. 4721743 9. 1290111  
6. 4995603 7. 2415363 6. 7221438 5. 4836846 3. 8330551 7. 6443984 7. 3491398 8. 954766  
8. 6476254 6. 7474796 6. 3888503 5. 6924011 7. 2902047 6. 4293849 8. 6395718 10. 876151  
8. 0901836 6. 3823887 6. 9043942 7. 6565133 4. 5471603 6. 3879907 7. 8082593 10. 426883  
7. 4902161 7. 4656997 7. 6596429 6. 9639842 4. 1588526 5. 5417752 8. 3658462 10. 113733  
8. 2555092 5. 5062423 8. 4679641 7. 3447667 5. 6817776 1. 661833 8. 5304317 10. 158857  
9. 4092361 7. 01811 7. 5091166 6. 7095742 7. 808296 5. 8644174 8. 4950726 10. 576192  
9. 2561103 8. 5206878 8. 1920623 6. 2687462 4. 0965206 3. 3152221 8. 699819 10. 397153  
8. 975116 7. 3427916 8. 5417418 7. 421243 4. 2451207 4. 3723772 8. 8005049 9. 468836  
9. 6228202 6. 4446757 9. 2965461 6. 4953437 7. 2667828 1. 9369675 10. 138861 10. 642442  
6. 6637736 8. 1236109 7. 3667544 6. 5264196 4. 3072748 7. 7637701 8. 057378 9. 80234  
8. 5105383 7. 3196759 8. 0395421 7. 2777292 5. 2689127 5. 8570994 9. 7780243 10. 939665  
7. 5594447 6. 774135 6. 0813455 6. 2363299 5. 745818 6. 9080294 7. 7434997 10. 032265  
8. 4789956 4. 0767189 9. 3130478 8. 117834 5. 3108494 1. 7353492 8. 6506148 10. 374182  
9. 1100469 5. 4053471 8. 1286125 7. 3417999 5. 4245913 6. 430294 8. 7236863 10. 106762  
7. 3670693 7. 8112883 6. 713659 6. 5547233 3. 5778445 5. 9137417 7. 7547944 10. 035573  
8. 6515589 5. 2687092 8. 1480217 7. 152175 7. 8586442 3. 1950935 9. 5188584 11. 246085

9. 6956248 5. 6860805 7. 8463624 7. 4248157 7. 6555179 3. 48775 9. 0516794 10. 720056  
8. 0007134 6. 9039116 8. 0181463 7. 3112309 6. 2055103 6. 6104238 8. 5815457 10. 453691  
8. 3659903 7. 4620907 7. 1424482 7. 8895349 5. 1561716 7. 5602 8. 8899604 10. 2732  
8. 2614023 7. 269797 7. 0329186 7. 4402563 5. 5348599 6. 2032452 8. 4092973 10. 132278  
7. 9670588 6. 6032323 7. 0497804 5. 8938806 4. 6415152 7. 3211652 8. 2227107 9. 8362702  
7. 0133017 6. 900345 6. 733622 6. 9587245 5. 3295373 8. 0793661 9. 1697858 10. 712637  
8. 5071975 7. 4241057 7. 9497008 6. 9955084 3. 9267685 3. 0013054 8. 1266188 11. 306421  
7. 6647458 6. 2116808 7. 0666878 6. 6009629 5. 0053486 5. 5706745 8. 9536749 10. 011791  
9. 2956329 3. 6262927 7. 7094057 7. 7161198 5. 5068848 1. 6165251 8. 2420382 9. 4411946  
9. 8559847 6. 3615288 8. 6989898 7. 2452812 5. 2018988 1. 8252247 9. 3051311 10. 028699  
7. 7303898 5. 1755617 7. 1400909 6. 1813842 5. 6410011 5. 1682568 7. 9202237 9. 5791627  
8. 3734498 7. 9212491 8. 0997103 7. 0399124 4. 3256225 3. 347438 9. 0785196 9. 9629043  
8. 8897401 4. 8889548 7. 5962847 7. 3482877 6. 2232514 3. 7874304 8. 9255934 11. 454142  
8. 2781405 6. 5111957 7. 7796371 7. 3251193 6. 0528457 4. 2151393 8. 2887993 9. 8139628  
9. 3109083 6. 281572 6. 8507107 7. 0229768 4. 0174269 4. 5402261 7. 8831805 9. 3770762  
8. 8857288 6. 1259082 8. 0872431 7. 5229681 4. 2482529 6. 2279266 8. 8960318 10. 479348  
8. 4081547 5. 7596981 8. 0485856 7. 3954004 5. 0304269 5. 4834081 8. 2174504 9. 5918493  
7. 5981242 7. 4627479 7. 293756 7. 2813654 5. 4417124 5. 7932664 9. 0001652 10. 668785  
7. 7679182 5. 1288485 8. 3237995 7. 416355 5. 1788521 5. 2135796 9. 1314094 10. 222158  
7. 4003531 5. 9812843 6. 8393662 7. 1132847 4. 7244401 5. 1160256 7. 7014996 8. 8068133  
10. 104365 5. 7063658 8. 1726788 7. 8941318 4. 8685155 6. 2237842 9. 0084173 10. 781908  
8. 5293593 4. 7737696 8. 3301525 8. 5667852 5. 6550403 5. 7857872 8. 5630065 10. 308805  
8. 2236209 6. 0129659 7. 6068928 8. 2432038 5. 4090692 6. 2468514 8. 7383814 10. 74753  
8. 6134323 6. 4208839 7. 3568207 7. 2632077 4. 7544007 7. 255046 8. 1167021 10. 857419  
9. 933529 7. 5366694 7. 8093824 7. 1612902 5. 4659173 5. 4702764 8. 7601273 10. 928989  
7. 2240821 5. 1300387 8. 3286839 6. 271214 5. 9147902 4. 0204468 7. 5890589 10. 527151  
10. 465367 3. 6841737 8. 353793 7. 9441868 6. 0068086 2. 380849 9. 3019159 10. 90923  
8. 2391178 5. 9497812 7. 7243546 7. 2712427 3. 6426457 5. 2040305 8. 9756079 9. 7181498  
8. 6168412 5. 6280061 7. 7283611 7. 286081 6. 2507964 5. 3224581 8. 881114 10. 835939  
8. 0047833 5. 3585387 7. 5028264 7. 2221419 5. 0896107 5. 7163021 8. 6691112 10. 34147  
9. 7009098 4. 7883272 8. 0552339 7. 6484154 8. 0357017 2. 0417314 7. 8252043 11. 35267  
7. 982011 5. 7120652 7. 3550703 7. 4392567 6. 0540866 7. 4963188 7. 4163466 9. 6893496  
8. 8295165 7. 266146 7. 158616 7. 0810903 4. 5741774 6. 2415365 7. 6529039 10. 678779  
8. 420892 4. 753957 8. 1924483 7. 4957629 5. 8242898 2. 0417992 9. 97201 10. 949784  
9. 3585753 6. 4425164 8. 2542283 8. 0214448 5. 2575756 4. 3690531 9. 3010667 10. 515269  
8. 6045386 5. 0289949 8. 6924841 7. 8255818 5. 0355204 3. 2703286 9. 2483614 11. 572637  
8. 5075356 6. 1907923 7. 9989737 7. 8045352 5. 4854195 5. 8638492 9. 0693875 9. 8840137  
7. 7146458 7. 442036 7. 9211303 7. 6099322 3. 9650722 7. 4522949 8. 3615834 10. 363275  
7. 8851619 5. 3746361 8. 3485646 7. 9502211 5. 2672209 2. 2457436 9. 0015999 9. 7295927  
7. 9229743 5. 7319844 7. 4703781 7. 088363 4. 1810756 3. 0097031 8. 030949 9. 3443801  
7. 9106908 5. 3893711 7. 8112174 8. 1254627 5. 3118604 4. 5115773 9. 0845262 9. 7482828  
8. 2879035 6. 6315233 7. 8758992 8. 048804 4. 9298704 7. 8852805 9. 2912122 10. 821727  
8. 0998609 5. 3512376 7. 6927395 7. 8606036 4. 9685085 4. 2406802 8. 4523671 9. 3392481  
8. 4467212 3. 8436859 7. 2646707 7. 4717171 6. 9529805 2. 0434899 8. 2987528 9. 5134031  
8. 687479 2. 8348845 7. 1654744 7. 1397923 6. 4030784 2. 0662223 8. 3797259 10. 238819  
7. 8798787 6. 031357 7. 9934963 6. 8011598 5. 0950809 7. 212542 8. 4324547 9. 9925731  
9. 4730639 6. 5657931 6. 8654068 6. 7942728 4. 2209311 6. 6289323 8. 4473459 9. 5143633  
8. 0005978 5. 7539589 5. 7864826 6. 5254106 3. 8099848 4. 765162 6. 5768479 8. 0945761  
8. 5571873 8. 5233523 7. 3487094 7. 4948579 3. 6416488 3. 9796953 8. 009102 9. 6160695  
8. 7765456 6. 8321207 7. 4567363 7. 5036845 4. 6335821 6. 8051546 9. 3439881 10. 62763  
8. 5418877 5. 6446098 9. 1042995 7. 1706028 5. 1985239 2. 2992819 10. 321363 10. 724125

8. 5344514 4. 794518 8. 1710455 8. 2068908 5. 5833931 2. 1468085 10. 331235 10. 567016  
7. 8020753 3. 7074386 7. 7153203 6. 7956536 4. 5116292 2. 8470009 8. 7134228 9. 2545119  
7. 5660623 7. 0204731 7. 0055974 7. 3469461 4. 6793709 8. 3148188 7. 9973104 10. 696145  
7. 7673786 6. 4281124 6. 747782 6. 8908289 4. 4255849 6. 6271363 7. 3877561 9. 1867539  
8. 1093364 6. 2421613 6. 7421638 6. 4323655 4. 3627308 6. 398455 8. 1093992 9. 3873012  
7. 1939865 7. 0087931 6. 7728215 6. 7200861 4. 4881988 6. 3816775 8. 3343256 9. 7734751  
9. 5805915 8. 0874562 7. 9849254 7. 6431999 3. 3726108 3. 8188776 9. 0192848 10. 13388  
6. 8183125 7. 4302143 6. 6983722 6. 4264322 3. 5752453 5. 2172451 7. 0200444 9. 0913085  
7. 4593875 7. 4264472 7. 430714 7. 1493021 3. 6949253 5. 0163486 8. 1886367 9. 4073484  
8. 4673987 6. 3921522 7. 3451399 7. 6055007 3. 8446883 5. 0675929 8. 9108059 10. 009278  
9. 0683661 6. 2233303 6. 6615367 6. 4532649 4. 3995636 5. 2287017 8. 3449584 10. 537437  
8. 6048543 5. 1758671 8. 5433391 7. 1957991 5. 72987 2. 0661778 9. 1607267 10. 348998  
8. 354535 5. 6795127 8. 3933296 7. 3090854 4. 4334427 4. 4525004 9. 1065441 10. 233227  
9. 7919985 5. 6171653 8. 5273971 8. 1012342 6. 1983347 3. 3930906 8. 9811443 11. 092378  
7. 8599504 7. 0414899 7. 0611222 6. 6420477 4. 6536527 5. 7385923 7. 8231026 9. 9843683  
8. 958946 6. 9481452 8. 3988404 7. 4839934 3. 6740403 7. 5900179 9. 0688783 10. 200116  
7. 9238481 5. 9122301 8. 1810358 6. 8798576 5. 0892919 4. 8732157 9. 3507121 9. 7446597  
8. 3873833 6. 0879921 7. 7480563 7. 3642452 5. 3007003 7. 505443 9. 0587131 9. 4435801  
8. 6429841 7. 2801102 7. 2121863 6. 0902106 3. 9389252 6. 0091429 8. 3362696 10. 169961  
8. 3041913 6. 5430563 8. 0353834 6. 9845191 3. 8830125 7. 5055968 8. 7388618 9. 9302693  
9. 9254097 6. 0834753 7. 6560402 7. 1196177 6. 6123528 4. 1350702 9. 3896962 10. 421263  
8. 0051239 6. 2538497 7. 1926364 6. 359119 5. 2964322 6. 1307422 8. 1106523 10. 190555  
8. 2165779 4. 918108 8. 7648706 7. 4596099 7. 0759656 2. 0365311 9. 7425753 10. 940663  
9. 0158968 4. 9143607 8. 2029861 7. 6527954 6. 2031 1. 8463173 9. 3747009 10. 509127  
9. 4266092 6. 6703892 7. 7479826 7. 6289469 6. 5934442 1. 6250727 10. 534251 11. 230702  
8. 3185464 5. 5562033 7. 8173329 6. 7745936 3. 6867961 3. 9425211 8. 39707 9. 0918199  
8. 6884844 4. 6052496 7. 5031999 7. 7680899 4. 0015531 1. 9242164 8. 4783797 11. 258323  
8. 8610054 5. 913439 7. 8615165 7. 7049753 5. 2892219 5. 2398548 9. 7397798 11. 053708  
9. 8376636 5. 4135392 8. 034291 7. 4838772 6. 4830864 1. 6174872 9. 9004745 10. 924971  
8. 8917244 7. 5995694 7. 835373 6. 7635995 3. 6488828 6. 357902 8. 7026986 10. 370255  
7. 7335074 7. 737287 8. 1597686 7. 1532247 4. 3273747 5. 8765946 9. 0321517 10. 200336  
6. 8645219 3. 4300365 7. 960306 7. 2704648 6. 5888027 2. 2064882 8. 9617999 10. 233679  
7. 8012279 3. 7707505 8. 0007942 7. 1538515 4. 0834053 4. 1279132 8. 47546 9. 5798925  
8. 4077073 6. 5291454 7. 8741146 7. 4615031 5. 0059853 6. 0244047 8. 6170195 10. 441972  
8. 9663864 5. 6052897 7. 7539647 7. 6648545 6. 3934119 4. 619696 8. 0069216 10. 302092  
7. 021975 7. 5380359 6. 247983 6. 0239801 3. 7813935 7. 904791 7. 7899355 9. 4257587  
8. 6289044 5. 5872856 6. 9761372 7. 2211753 6. 3799084 4. 2538769 7. 7591665 9. 8349065  
8. 4046959 4. 6534247 8. 1485916 7. 0557075 4. 835421 5. 176581 9. 3374843 10. 130804  
8. 512838 5. 6761883 7. 6395025 7. 2717331 5. 683937 4. 861949 8. 3435988 9. 7649978  
8. 6816093 6. 538302 8. 4766534 7. 7155705 5. 5695982 7. 0031371 9. 5851344 10. 76114  
8. 6975427 6. 6776047 8. 9912906 8. 5517477 7. 1455818 1. 7134536 9. 976961 11. 829456  
9. 2189199 4. 83193 7. 911471 7. 7800425 5. 784136 5. 6716067 9. 202626 11. 151491  
7. 7961783 7. 6173404 8. 0294404 8. 2829425 4. 8878015 5. 6118317 9. 1207627 10. 686088  
8. 926546 5. 3806884 7. 7840466 6. 780158 5. 6175659 2. 3038146 8. 96454 11. 17686  
7. 9435205 6. 2765297 7. 3527333 7. 5175612 5. 8478726 4. 4879499 7. 867523 9. 9524097  
8. 0274344 5. 4846042 7. 4660911 6. 7792715 5. 3932093 6. 0011589 9. 5027429 11. 21115  
8. 2834407 6. 9557093 7. 8555134 8. 1093046 6. 0137027 5. 0748708 9. 370825 11. 082199  
8. 6608156 4. 0847119 9. 1581205 7. 6736051 7. 3319642 1. 6431398 9. 2632303 11. 292458  
9. 0289703 6. 6411012 8. 8710017 7. 540199 5. 7541967 2. 6861855 9. 5295111 10. 568627  
8. 3905372 5. 8619799 7. 3834178 6. 6923205 5. 37732 5. 4878917 8. 4069103 10. 510839  
7. 3112681 7. 4938657 6. 970258 6. 8154802 4. 7708088 7. 7621961 7. 6372852 10. 188105

6. 6577631 6. 4077404 7. 5518279 6. 726853 3. 4932272 5. 8407704 7. 3606867 9. 0079278  
9. 3510389 7. 1374129 7. 6044042 6. 7076596 4. 0921705 7. 0669074 8. 855 10. 834108  
9. 7263318 5. 5453348 7. 6108852 6. 262481 3. 6648207 6. 0482646 9. 5131621 10. 179152  
8. 6204202 5. 0694021 7. 7758798 7. 5467173 6. 7400155 4. 9128041 8. 2591318 11. 927529  
9. 2717756 5. 8945031 7. 5569993 7. 1268917 5. 5098831 5. 4245264 8. 523023 10. 034318  
7. 1136503 7. 2852396 8. 0359997 6. 9693014 3. 8206906 8. 208328 8. 7898556 10. 447622  
7. 8418162 6. 4959103 7. 2900292 7. 4659446 3. 5066091 5. 9761525 7. 8154558 9. 4532988  
7. 8553991 6. 7287403 9. 1083475 7. 3016367 6. 789728 4. 7642271 9. 7927319 11. 512393  
8. 8926785 5. 8011052 6. 7162844 6. 6198936 6. 9047662 4. 5042041 8. 2719385 10. 230769  
8. 1449101 5. 8830453 6. 6082138 6. 8634501 5. 5089145 7. 1435695 8. 6024112 10. 383101  
8. 9197569 6. 9280003 9. 0774477 7. 3700309 6. 8372706 2. 5622924 9. 5311232 11. 666582  
7. 3589484 5. 2461399 6. 4977133 7. 3135758 3. 9225403 6. 0761784 6. 9861414 9. 7510795  
9. 9950119 6. 9988575 7. 8073668 7. 4075919 4. 8052246 6. 9628279 9. 0747654 9. 6989055  
9. 6963805 6. 9524988 7. 8901261 6. 9270648 5. 7215365 6. 3388245 9. 1820435 10. 727586  
9. 0212447 6. 7921475 8. 460306 7. 8236176 5. 7645762 5. 6975985 8. 3141942 10. 635548  
10. 217353 5. 9229655 8. 0142149 7. 2306625 7. 2331114 2. 2995089 8. 995593 10. 149394  
8. 4300531 6. 5276684 8. 2231615 7. 726681 7. 0248517 4. 8162991 8. 6424883 11. 661711  
8. 1088977 7. 3426394 7. 3862261 7. 6878023 5. 1987493 7. 0991046 9. 299892 10. 968014  
9. 7494694 6. 44564 7. 5506561 6. 943377 6. 357765 4. 8260237 8. 310264 10. 353532  
8. 9056349 6. 1975589 7. 8393408 7. 7517962 6. 8837355 6. 1247118 8. 2986105 11. 025456  
8. 9379126 6. 1491679 7. 4895404 7. 2227773 6. 2743941 5. 0523929 8. 0942418 10. 251603  
9. 2967505 5. 4813217 7. 9439286 7. 8406793 7. 640827 3. 7507505 9. 401277 11. 239544  
9. 9206142 7. 1320425 7. 7280335 6. 9136519 5. 6792418 4. 7497752 8. 7657001 10. 578999  
7. 7819367 5. 0550892 7. 4564777 7. 3088593 5. 4059706 3. 8618364 7. 9721712 9. 7048734  
9. 6729762 4. 834463 7. 9703016 7. 7370234 6. 6984789 2. 5580755 8. 2232731 10. 120097  
8. 116161 6. 7863735 7. 8086279 8. 8594555 6. 2625633 6. 8814091 8. 0752972 9. 9243802  
9. 0237211 6. 8407214 8. 0432148 7. 9805862 4. 7688184 8. 179312 9. 6870069 10. 805251  
8. 8076751 7. 1066249 8. 1707737 7. 9265549 4. 1822694 6. 5586381 8. 9863883 9. 3190998  
8. 4031743 6. 2575242 7. 5456244 8. 1809028 6. 3547063 5. 8318581 8. 0822859 10. 444994  
9. 4506718 6. 759725 7. 5726854 7. 0161011 5. 3909619 6. 9997978 8. 2435061 10. 327455  
7. 8852282 6. 6814514 7. 5132474 7. 1819203 5. 0292616 5. 9729307 8. 1838982 9. 5443597  
8. 3666833 7. 5392167 7. 3279618 6. 9472254 4. 0990761 5. 926098 8. 5318901 10. 586396  
8. 9422086 5. 9433262 8. 0095354 8. 2774672 4. 8693682 4. 6258643 9. 4894267 11. 107803  
8. 4192471 7. 1563472 6. 3762837 6. 4967691 4. 4603252 7. 4473231 8. 2895971 9. 906043  
8. 0578418 7. 3553573 6. 3623056 6. 7069951 5. 1901413 7. 700611 8. 0519177 9. 5519687  
8. 1695826 8. 0195996 7. 4030945 7. 8920646 4. 9631788 7. 2463293 8. 5192856 9. 6867725  
8. 0938485 4. 4526713 7. 7266872 7. 484837 6. 2707101 3. 9124678 8. 3697515 10. 341363  
8. 3008 5. 8707025 7. 7613127 7. 7304046 5. 4317034 6. 3973809 9. 6541247 11. 840202  
9. 7637455 4. 2488678 8. 358016 6. 9464253 8. 2086253 2. 6800215 8. 3924999 10. 053307  
8. 625248 6. 8974236 7. 2987404 6. 0046649 6. 4858709 5. 5138067 9. 3498603 10. 765891  
8. 0465926 6. 7965027 7. 0403888 7. 9788738 4. 4893483 6. 6739242 8. 0365662 10. 655281  
8. 2239727 6. 2577665 6. 6003927 7. 2002976 4. 0589476 6. 3140873 7. 3360788 9. 9471053  
8. 4075538 5. 3407249 8. 9958823 9. 0901494 5. 3698061 1. 6064802 8. 4740107 10. 039684  
7. 4187282 5. 7617452 6. 9330913 7. 1622598 4. 3320687 5. 3077484 8. 2968915 9. 9851235  
8. 5201608 5. 8365412 7. 4002998 7. 3047203 4. 9145075 5. 7254063 8. 9427496 10. 472606  
8. 3613287 3. 7373689 8. 0511319 7. 2602665 6. 1035724 1. 603776 8. 9580197 9. 7026926  
7. 8837623 7. 1256837 8. 5957939 6. 9420513 5. 4078867 7. 1200583 8. 9354394 11. 239684  
9. 3163664 7. 3257377 7. 990699 6. 4970864 4. 0002444 7. 0180905 8. 3435173 9. 8369404  
9. 2136013 7. 0194184 7. 9446058 7. 4821348 6. 633403 5. 8009956 8. 6147078 10. 886583  
8. 5055447 4. 0839524 7. 6634905 6. 8171858 4. 8854229 3. 1104828 9. 0321831 11. 183601  
7. 7845572 6. 6781144 8. 2118094 6. 9441507 5. 374345 6. 2755474 9. 282185 10. 343295

6.9309545 7.2376344 6.7279514 6.4600288 4.7270785 7.5325308 7.9754805 9.6030579  
7.4960343 6.0072747 8.8285647 8.621325 6.7456088 5.9114736 8.8211177 10.985239  
9.2810329 5.7512559 8.2298133 7.8008382 6.8788108 3.7750743 9.0556528 10.049834  
7.8639763 5.9460009 6.6685308 7.3800097 4.7634323 5.09578 7.2859973 9.3384515  
8.8510454 6.4157886 8.6791707 8.0010827 6.9067324 6.1622557 9.0353744 11.049944  
10.594173 6.3647444 6.7637172 6.9446048 6.5887912 3.9688137 8.2820785 10.519561  
8.3658554 7.0326567 8.2217358 6.6160927 5.1501187 2.8671222 8.9427052 10.32781  
8.8408653 7.0349208 7.5860375 7.3373243 6.44357 6.0473713 8.7018454 10.854382  
7.1397367 6.7035013 8.4352005 6.8360977 4.1464279 4.212927 8.2340183 9.8676766  
8.1614621 8.5256152 8.3489389 7.0300683 3.5648445 7.9067161 8.1944494 9.1541919  
8.5369134 6.4944393 8.2033964 7.043448 4.7450138 6.1661167 9.193576 9.8469334  
8.9377054 6.6745959 8.3892666 7.3529586 5.9784415 5.7060003 9.0016285 10.996475  
7.9185693 7.3191371 6.7988145 6.626041 4.4974869 7.2527029 8.6171767 9.951544  
9.5251617 7.0254092 8.3711086 7.5834767 5.2128961 6.6685643 9.3851022 10.038744  
8.20801 6.9017409 7.8270305 7.2569368 3.9020258 6.6268974 8.8356773 10.303209  
9.2441307 6.3022522 7.2811721 7.3622306 6.4747315 5.4211748 8.179532 10.254721  
7.9562826 7.8057895 7.0035051 6.7351768 4.7142859 7.7649821 8.592649 11.005164  
8.8100703 8.1742927 7.5998111 6.8366131 4.7312884 6.9262561 8.0207015 10.225647



| DPM2      | UGT2B10   | UGT2B11   | UGT2B15   | UGT2B17   | MAN1C1    | UGT2B7    | EXTL3     |
|-----------|-----------|-----------|-----------|-----------|-----------|-----------|-----------|
| 8.2025324 | 10.5393   | 11.095323 | 11.054076 | 5.7805365 | 3.8697854 | 10.19457  | 4.5746902 |
| 7.6557033 | 12.255591 | 11.477017 | 11.950795 | 13.717624 | 6.0368103 | 12.679715 | 5.7792463 |
| 6.2889935 | 9.9966521 | 8.889093  | 12.405769 | 10.517669 | 5.0773797 | 10.660715 | 4.9977218 |
| 7.89944   | 11.832611 | 8.5804786 | 12.252278 | 7.6648206 | 4.9473426 | 13.25816  | 5.3409993 |
| 7.2306512 | 12.409362 | 8.3033552 | 11.089603 | 8.0978049 | 6.9668723 | 13.427154 | 5.4432542 |
| 8.1574649 | 10.016503 | 8.3993865 | 9.877288  | 10.848402 | 6.4635741 | 12.492196 | 5.1276136 |
| 8.2239759 | 11.253002 | 7.6576543 | 11.058827 | 6.8603617 | 4.4765422 | 12.652043 | 3.899785  |
| 8.4076462 | 9.7041005 | 7.0045096 | 9.83243   | 9.4615174 | 4.5731694 | 11.36831  | 5.9683517 |
| 7.8702061 | 5.5972388 | 8.2661858 | 9.0872148 | 8.1274982 | 4.0492644 | 6.1945341 | 4.9139893 |
| 8.2909435 | 10.070427 | 7.4289639 | 11.55616  | 13.682945 | 5.5555922 | 14.512323 | 4.2546505 |
| 7.4912423 | 9.5768058 | 10.255303 | 11.457589 | 5.6352253 | 5.2075785 | 9.8247022 | 5.2670767 |
| 7.3528276 | 10.585453 | 9.6993092 | 12.107661 | 8.1603755 | 5.2441771 | 10.204822 | 5.0078677 |
| 7.6214958 | 9.9685312 | 6.9668973 | 4.5506487 | 5.7264249 | 3.0005681 | 8.5610049 | 5.3610162 |
| 7.3990573 | 6.9543291 | 8.1163596 | 5.945367  | 5.9267081 | 6.8000555 | 6.4365797 | 4.6471554 |
| 8.1505691 | 11.309308 | 7.219653  | 11.426402 | 12.009332 | 4.708519  | 11.878921 | 4.4829415 |
| 7.555944  | 10.826534 | 11.2881   | 12.058409 | 12.475373 | 4.6291194 | 11.62549  | 4.3020692 |
| 8.0879225 | 13.498786 | 13.150748 | 11.220548 | 8.5608516 | 6.4426915 | 12.966427 | 5.560025  |
| 8.1213226 | 9.2450109 | 9.3900172 | 9.5884761 | 6.331031  | 3.8941703 | 8.8102724 | 5.2055382 |
| 9.5797151 | 10.188231 | 10.136954 | 10.490335 | 5.7129513 | 5.5197467 | 12.360856 | 6.0333614 |
| 7.6658818 | 6.3928176 | 8.2764869 | 7.6320407 | 10.686536 | 6.4769165 | 9.086859  | 5.2050869 |
| 7.3903826 | 11.336876 | 8.1904867 | 11.812746 | 10.781659 | 6.7116166 | 13.282258 | 4.5317631 |
| 6.2783086 | 12.207476 | 7.1735255 | 10.761531 | 6.4259774 | 6.7870219 | 13.363423 | 3.4120527 |
| 6.3529497 | 12.680336 | 6.834694  | 11.023557 | 8.7232853 | 6.444427  | 13.486144 | 4.1537464 |
| 7.4120059 | 10.784399 | 6.6535669 | 11.202083 | 6.6467029 | 6.1539858 | 11.632017 | 4.9931179 |
| 6.87156   | 11.945339 | 7.8333268 | 11.595342 | 12.787444 | 5.9061797 | 12.841447 | 4.6214966 |
| 6.4375045 | 11.488443 | 7.5968181 | 10.857683 | 11.357022 | 7.0066728 | 13.191946 | 3.7061451 |
| 7.0742227 | 11.955205 | 8.4057574 | 11.413001 | 5.6167428 | 6.3063577 | 13.366061 | 3.5221268 |
| 6.2807443 | 12.533854 | 7.798616  | 11.191009 | 6.3610635 | 6.2653857 | 13.713215 | 3.2838181 |
| 8.2192254 | 10.074711 | 10.061201 | 10.026827 | 5.7034406 | 5.7923473 | 11.320699 | 5.007723  |
| 8.0517806 | 10.228072 | 11.505338 | 11.03469  | 12.912533 | 4.978988  | 12.576862 | 6.2830013 |
| 7.1180622 | 10.246065 | 6.6129187 | 10.375794 | 11.772056 | 6.637041  | 12.735159 | 3.9056823 |
| 7.7158159 | 9.9125184 | 12.908177 | 10.162822 | 12.051087 | 5.0501208 | 11.611304 | 5.2475488 |
| 8.2069526 | 8.0008024 | 12.001763 | 11.577096 | 11.67688  | 5.7093093 | 9.0426767 | 3.7971381 |
| 8.4739794 | 10.58061  | 7.8697203 | 5.4541861 | 5.7100356 | 6.9509497 | 12.679222 | 4.7763607 |
| 7.9563197 | 12.465462 | 8.9665316 | 11.564201 | 8.8055442 | 6.793906  | 13.379207 | 6.0848242 |
| 8.7302848 | 8.8162158 | 11.556978 | 8.0800966 | 5.6564383 | 2.9901812 | 8.3286118 | 4.19962   |
| 7.0897053 | 12.068495 | 6.7580086 | 10.237573 | 6.2127581 | 6.1531593 | 12.452952 | 3.9358979 |
| 8.1759555 | 11.113734 | 11.439567 | 11.767063 | 13.184516 | 5.3907021 | 12.136302 | 4.9864784 |
| 7.9976964 | 9.3669999 | 12.190208 | 10.575932 | 7.7145272 | 6.0267743 | 12.016355 | 5.5935617 |
| 7.5548044 | 11.490761 | 8.8739858 | 11.653584 | 8.1013786 | 4.5156288 | 12.750335 | 5.6226572 |
| 7.9831733 | 8.4090568 | 8.6069717 | 10.317808 | 5.5420242 | 4.7084196 | 11.961142 | 4.8468086 |
| 7.5541771 | 6.8660077 | 8.467263  | 6.0146103 | 5.6135889 | 3.4336144 | 8.1627647 | 4.9561465 |
| 8.5957245 | 5.1421825 | 7.7632398 | 7.8858283 | 5.5976507 | 4.801707  | 10.211724 | 7.4529225 |
| 7.7217447 | 8.0602387 | 9.1845968 | 9.1943206 | 6.1969093 | 6.5196317 | 9.9162912 | 5.9276579 |
| 7.9570596 | 9.9197154 | 9.1275097 | 10.788681 | 6.3178024 | 4.6206702 | 10.683361 | 5.2717125 |
| 8.7827773 | 11.011472 | 11.046815 | 12.248776 | 7.1597581 | 5.7496197 | 11.176853 | 6.6214264 |
| 8.4477186 | 6.4293913 | 8.2540711 | 4.9393997 | 5.5420242 | 2.7486094 | 7.5173758 | 4.4933738 |
| 9.0414352 | 6.1818111 | 9.7350466 | 8.6537166 | 11.067695 | 4.3953373 | 9.5309911 | 4.8777131 |
| 8.6381348 | 7.0617148 | 6.267528  | 7.3470119 | 5.6739237 | 4.2246155 | 9.5055954 | 6.1530839 |
| 7.9445582 | 9.8730661 | 10.88917  | 11.172803 | 7.8111432 | 6.0376711 | 11.657859 | 5.1536294 |

8. 3174805 10. 79653 9. 4334571 8. 2292471 5. 7781527 4. 0205297 10. 338267 5. 9372532  
8. 2301683 9. 9972065 7. 8973966 10. 76453 5. 6011096 3. 7710182 10. 59787 6. 675185  
7. 9631608 8. 2619128 8. 0030416 5. 8704776 5. 6013971 3. 3075491 8. 0773777 5. 288841  
7. 7213475 8. 8437832 7. 493529 11. 543792 6. 9392381 5. 8334884 11. 882798 4. 86412  
9. 0226624 4. 6706793 7. 283179 4. 5548225 5. 5420242 3. 6373743 4. 689178 6. 6985213  
8. 505045 4. 949217 6. 1848036 3. 9822369 5. 5420242 7. 783786 4. 4702285 8. 1577822  
8. 3059866 11. 807743 11. 871189 10. 555356 6. 0583977 4. 38454 11. 574117 6. 5201287  
7. 0758739 9. 576604 7. 5634979 11. 473151 6. 4794296 2. 6844976 9. 6456573 4. 3722067  
8. 1988656 5. 0839281 7. 4807497 6. 9177153 5. 5420242 3. 7121933 8. 0193605 6. 3411195  
8. 8736454 6. 1930992 6. 6847998 4. 443887 5. 5420242 6. 1752485 9. 3500286 5. 047351  
7. 6641239 10. 281915 7. 2152047 9. 0772252 5. 7103053 5. 217706 9. 2546968 5. 3992576  
8. 0668173 4. 475852 5. 9986127 3. 7441725 5. 5420242 10. 583542 3. 7864662 7. 0431155  
6. 9762041 13. 132374 10. 25337 11. 972686 7. 3046246 5. 8973957 13. 786028 4. 4690279  
7. 4736626 13. 22249 8. 4045123 12. 177099 10. 511185 5. 9412201 13. 484998 5. 0823459  
6. 410621 13. 112705 9. 0142036 11. 400821 10. 382472 6. 0186994 13. 435008 4. 3962859  
7. 9198842 5. 4181339 10. 408987 11. 112402 9. 3159025 5. 890707 7. 3104357 5. 0028391  
6. 990506 9. 8500567 8. 3514296 10. 726031 5. 8612635 5. 8796631 11. 660994 4. 5600113  
6. 3929688 12. 164216 7. 4047561 11. 202019 12. 4322 6. 5709044 13. 180927 5. 3288279  
6. 8172151 10. 935756 7. 4193597 11. 118034 6. 3575209 5. 1243117 10. 632618 4. 6211982  
7. 2197116 11. 45116 7. 143214 11. 793078 8. 0425823 4. 8327365 9. 8037914 4. 9606765  
7. 2829162 10. 921212 8. 5882312 8. 0018485 8. 6004244 5. 3866536 11. 96948 6. 3078527  
6. 536235 12. 901381 7. 2775524 12. 343044 8. 7424162 6. 7728744 5. 1028932 5. 2517519  
8. 7448575 8. 9833655 15. 788155 11. 806472 9. 4986959 4. 9422234 10. 654956 6. 8548051  
7. 7061513 11. 334293 11. 439255 9. 9243442 7. 8226758 4. 5063969 12. 701599 5. 8998597  
8. 5591656 10. 163514 9. 699723 11. 449187 6. 4466834 4. 3030733 10. 778561 4. 9519908  
7. 761319 8. 9291799 8. 4279064 7. 5572459 5. 9851456 4. 242113 11. 146014 7. 0631961  
6. 5139761 12. 621642 8. 7136585 11. 557756 12. 613059 6. 1620401 13. 288592 3. 9833594  
9. 0371988 8. 9411467 12. 102674 4. 5121012 5. 6436616 3. 087347 8. 448425 5. 2727446  
6. 5979988 10. 159878 8. 5158278 10. 675139 12. 429148 5. 8221154 12. 76135 5. 276457  
8. 6987432 10. 118417 11. 798087 9. 306501 7. 2529314 3. 1823222 11. 747239 5. 3976358  
8. 0240707 10. 673299 8. 3771823 10. 684049 6. 7717056 3. 126053 10. 832895 4. 1220349  
7. 6241306 8. 4232374 8. 2197409 9. 0662613 8. 5332601 4. 5401668 9. 0877289 4. 818963  
8. 5112475 11. 701234 12. 399798 10. 868218 5. 5420242 4. 1636525 10. 767734 5. 0115577  
6. 7624336 11. 367355 7. 7865693 10. 803345 7. 783797 5. 676341 12. 725378 4. 1965079  
8. 4428569 11. 000703 7. 6260114 10. 316071 6. 1579342 3. 1521441 12. 697259 5. 7637664  
6. 3056671 11. 782538 7. 1449417 10. 449071 6. 3705467 6. 3319885 13. 220919 4. 2452301  
7. 2855359 10. 742948 14. 184638 8. 4967724 6. 5088799 2. 7526147 10. 136536 4. 8979786  
7. 6969747 12. 201726 8. 4374548 12. 131508 10. 291225 6. 1218793 13. 389009 4. 3524115  
7. 133981 12. 419757 9. 6305139 10. 816547 11. 011898 5. 7366091 13. 707828 5. 058211  
8. 3530452 4. 6854428 6. 1924453 3. 9427622 5. 5694559 4. 529549 5. 3888793 4. 9291816  
7. 8664003 8. 8702015 14. 168183 7. 5891944 7. 1303397 5. 9727461 9. 9896321 6. 2024663  
6. 9420114 12. 075892 13. 881525 11. 636165 10. 856532 4. 3028759 13. 753312 6. 2739079  
7. 5196133 8. 693398 10. 949683 10. 282542 7. 3429145 4. 5628665 10. 152351 5. 0256784  
8. 7465988 4. 9171535 8. 9094951 4. 7336598 6. 1818771 4. 057094 7. 693721 5. 9874916  
6. 7701422 13. 031164 9. 8126008 13. 035938 7. 298859 6. 2749676 14. 011818 4. 2222459  
7. 4294365 9. 7603117 9. 8559366 11. 044005 9. 8562864 5. 2346888 10. 738963 5. 317064  
6. 6271751 11. 431926 7. 6616861 11. 53326 7. 6659885 5. 9420125 13. 162665 4. 2073933  
8. 4792332 7. 1694078 7. 7303998 6. 7756771 6. 705239 4. 5418025 6. 8431721 6. 1730652  
6. 8864473 10. 848345 9. 0878071 12. 370479 7. 4884142 6. 4482042 11. 913597 5. 0598312  
6. 8326121 11. 354008 7. 2601812 10. 870336 9. 1440248 4. 9566717 12. 319243 4. 5451778  
8. 3154131 10. 28721 8. 632138 9. 1135201 8. 8520306 3. 9977198 10. 65473 6. 9578256

8. 0067791 9. 2765647 9. 8240588 6. 4462509 5. 7329909 5. 0701465 10. 119787 5. 2052279  
8. 3221663 10. 120958 10. 552013 11. 278208 8. 52368 6. 7498816 11. 364841 5. 6876972  
7. 5935042 11. 080331 8. 0035434 11. 108182 8. 7361152 6. 2240494 12. 850634 5. 9356711  
7. 4072834 12. 486294 11. 445319 12. 306117 12. 859457 5. 0157029 13. 263001 4. 63027  
7. 4979781 11. 210936 7. 041146 10. 174244 8. 8414214 5. 8130433 12. 900757 4. 2061511  
6. 7543524 10. 560937 6. 3893809 6. 7332509 7. 1251293 8. 2173986 4. 057204 5. 5771155  
7. 7045749 12. 113608 14. 01 12. 481157 12. 401304 6. 0927718 12. 216168 7. 124692  
7. 1767469 11. 709455 11. 922796 11. 309326 11. 598988 4. 0070637 13. 257568 4. 8245182  
8. 3766067 8. 7938278 8. 8985874 8. 5805792 6. 6941862 3. 152968 8. 4648016 4. 1250693  
8. 0055515 5. 9242716 8. 6666706 10. 932983 6. 0848848 4. 2682196 8. 5295155 5. 1954662  
7. 0007186 10. 133989 6. 7055138 11. 136586 5. 66942 4. 2443132 10. 74396 4. 4458307  
7. 9039327 8. 693562 8. 9342405 8. 8370442 8. 7561637 5. 3934454 9. 3342926 5. 4631131  
7. 8022926 9. 2591906 12. 256109 10. 203373 5. 7141651 4. 2494708 10. 142937 5. 328056  
7. 7242202 8. 3392539 6. 6643346 7. 6508088 5. 5420242 4. 8187185 7. 9845565 4. 3172656  
7. 7721618 7. 0909427 7. 6572725 9. 6763228 5. 7067459 4. 6313538 10. 72824 3. 7650486  
7. 5578763 9. 2311631 6. 9002677 10. 233455 5. 6196991 5. 7335403 11. 678104 5. 0396971  
8. 1279813 7. 9267804 9. 3626337 10. 633932 6. 9973153 2. 9890737 9. 1346431 4. 3770763  
7. 8620248 12. 390989 13. 372633 11. 54482 7. 1129354 3. 5989544 13. 458242 5. 7009578  
8. 0313129 8. 6882636 7. 682233 9. 8127778 5. 9999984 5. 481208 10. 538033 5. 5792129  
7. 8347773 11. 038079 9. 8612422 12. 172621 5. 5804479 4. 0315742 12. 875645 4. 6276185  
7. 9329822 11. 079778 11. 152512 12. 588395 9. 6894219 5. 9000556 12. 292062 5. 0746322  
7. 5199096 10. 099468 9. 8157673 10. 685492 5. 5942434 5. 1436682 12. 004077 5. 046721  
7. 7541222 10. 87232 9. 7635976 11. 879466 5. 6661428 6. 4162183 12. 319564 5. 4668326  
8. 08597 10. 954714 8. 9648879 11. 538304 7. 0353147 6. 1654443 12. 078217 4. 9573398  
8. 1808972 10. 867493 11. 880168 6. 2969678 5. 5420242 3. 6739346 12. 98688 6. 1464156  
7. 8689757 9. 0675364 12. 821026 9. 513667 7. 9660969 4. 9128675 10. 785383 4. 6966903  
7. 9603759 8. 9901568 10. 400972 7. 5372398 5. 6022671 4. 4827337 9. 1360229 5. 0566141  
7. 8292127 12. 689901 14. 468831 10. 686159 5. 5420242 3. 4132602 11. 633123 5. 6562499  
7. 4629921 11. 468866 10. 215166 10. 650154 5. 6578353 5. 8037434 12. 810568 4. 7281629  
6. 4960959 9. 4556514 9. 1645279 11. 643287 5. 7025153 5. 4141043 10. 478322 4. 9380999  
9. 1327674 7. 0700616 12. 583243 8. 4461201 5. 5420242 7. 2764768 7. 5852581 5. 163657  
9. 1028397 11. 743185 10. 167025 10. 922866 5. 781201 3. 0819624 11. 080978 4. 6680414  
7. 5015504 12. 385695 9. 6586281 11. 403041 5. 5842773 5. 2858542 12. 758309 3. 4606875  
8. 4742333 7. 8758631 7. 7316691 4. 7593908 5. 5727199 3. 4989892 8. 3574249 6. 0784777  
8. 450458 9. 4040158 12. 129766 9. 0540185 5. 5420242 3. 8869106 10. 554672 4. 8318665  
8. 5379069 11. 782045 9. 1199761 5. 5428897 5. 7957628 3. 8659458 11. 397814 7. 1338593  
8. 0934508 9. 1572103 6. 7601014 5. 0730623 5. 5710206 5. 1362211 10. 603083 4. 2436903  
7. 3533863 12. 876944 7. 8927523 10. 207748 7. 1636844 6. 1712467 13. 363781 4. 7530395  
8. 3526352 8. 3437347 7. 2001889 5. 314681 5. 5420242 4. 7496907 8. 0620811 5. 4336022  
8. 3651216 9. 7050531 7. 4610433 8. 7070896 5. 5764189 2. 9741081 9. 9387197 5. 5356624  
6. 8420807 10. 093385 8. 0992303 12. 25332 5. 7884488 4. 9744294 9. 6660183 4. 756139  
7. 7946069 11. 758218 8. 5168957 10. 446724 5. 5998791 7. 1598151 12. 328911 6. 8701443  
8. 1162872 9. 6116764 10. 469879 11. 180324 5. 566433 4. 1817587 10. 947914 4. 2125661  
9. 5205071 10. 587543 11. 455644 6. 7238142 5. 682922 2. 9497788 11. 055648 3. 697289  
8. 9209239 5. 8241942 6. 4614597 5. 2402117 5. 5420242 2. 6915555 7. 5151855 4. 1570085  
7. 9715523 10. 610984 7. 4324826 9. 4156762 5. 6027321 4. 685179 9. 7451817 4. 9771609  
7. 7616722 10. 940204 6. 9422561 11. 128356 6. 7550599 3. 4957287 10. 898006 4. 3920459  
7. 607169 11. 106846 7. 5964536 10. 366572 5. 5420242 4. 0439098 11. 830246 4. 027116  
7. 380842 12. 580712 10. 236763 12. 715572 9. 9483717 5. 8002852 13. 453398 5. 9089551  
7. 2359014 11. 807212 8. 779703 12. 263351 5. 7680332 7. 0004282 12. 672837 5. 0050102  
8. 3340462 8. 8543516 9. 6340081 8. 7670046 5. 5696158 4. 254646 10. 170382 6. 76942

9. 0156342 5. 3716827 6. 3256352 6. 4941209 5. 5420242 3. 7298377 6. 9905402 5. 4499934  
7. 6184644 8. 9669445 7. 5981143 5. 8942993 5. 6517915 3. 6638625 8. 9053728 6. 0498582  
7. 5394983 12. 771114 11. 019634 11. 876373 12. 02827 5. 8360752 14. 13839 4. 5134622  
6. 8431386 10. 869834 7. 9036358 12. 768222 5. 7677936 6. 0880823 11. 488791 3. 930779  
7. 6896037 12. 599393 9. 2336154 10. 735695 5. 6054378 5. 8271233 14. 063462 3. 8832867  
6. 8906602 11. 55584 8. 893621 11. 653924 5. 6209463 5. 5629639 11. 027541 3. 7362581  
8. 1133965 9. 2700329 10. 532566 12. 080651 5. 7014008 5. 6183601 10. 570246 5. 2573651  
7. 369797 12. 424811 8. 8616307 10. 567907 5. 5791426 4. 4073489 14. 039349 3. 6242109  
6. 5607066 10. 77037 12. 604652 11. 453946 5. 5817623 3. 4745082 11. 553979 4. 4378081  
7. 5603697 12. 726594 10. 120801 10. 100497 7. 0722418 6. 4882785 10. 67185 4. 3182428  
8. 0802029 12. 99279 8. 6432381 11. 615433 6. 3843922 5. 672196 14. 878001 4. 3625312  
7. 820644 8. 3736132 8. 6039538 10. 744216 5. 6878823 4. 2774766 6. 8896712 5. 4175604  
8. 3412117 8. 0090909 8. 7962007 11. 169026 5. 6981614 4. 7604726 8. 776637 5. 5991858  
8. 6984947 8. 8000446 9. 9864797 10. 371407 5. 6660451 5. 4331974 10. 130619 6. 0695843  
6. 5657863 10. 610351 7. 5049777 7. 177763 5. 5420242 6. 3684173 10. 504943 4. 3664567  
7. 5919881 10. 974149 8. 7153035 12. 127513 6. 1688373 5. 4389752 11. 498862 4. 6419173  
7. 1650568 9. 3759336 9. 1706711 10. 231803 5. 6367571 4. 3257115 9. 3471162 5. 0409249  
6. 338092 9. 1261943 7. 2399507 11. 207491 7. 10819 5. 3172554 10. 113378 4. 6404304  
6. 7405771 13. 110038 10. 255308 12. 097423 5. 9280672 4. 7681113 12. 668498 5. 0454699  
7. 9795037 9. 9420202 10. 334492 12. 494105 6. 6063384 4. 3936444 10. 95543 4. 8886513  
7. 201277 6. 2409769 9. 2705317 9. 3784824 5. 7554555 5. 0824614 9. 7918432 5. 3498073  
6. 9108047 11. 266742 12. 50944 12. 692398 6. 3457924 6. 3146266 12. 05372 5. 1471802  
7. 8107294 6. 0403283 7. 6830643 4. 6419022 5. 5420242 6. 5818976 5. 7969212 5. 4763396  
7. 4907584 6. 4954928 7. 9876459 5. 3866714 5. 5701424 4. 8966844 5. 9956191 6. 0702591  
8. 3084089 4. 6658681 8. 5674178 6. 3624043 5. 5420242 4. 5260214 7. 0950863 6. 2750362  
7. 5127521 8. 728767 8. 9107867 8. 4022987 6. 6887766 3. 6999001 9. 5041506 5. 2174577  
7. 6938358 6. 138848 6. 9007036 4. 0536767 5. 5420242 2. 6656165 6. 3260432 4. 8469527  
6. 915353 11. 390075 9. 5469951 10. 484579 5. 6945379 5. 8193498 10. 822812 5. 1633914  
8. 6697762 4. 6014068 8. 68197 4. 8746808 5. 5420242 4. 0667288 5. 014599 6. 4780671  
7. 4073211 11. 686687 9. 3691111 11. 586395 11. 957243 6. 014082 12. 420508 5. 1606115  
7. 4870719 11. 92795 8. 182593 9. 9185606 8. 1392589 4. 2724617 13. 387287 5. 6029082  
7. 9336602 7. 9858579 11. 63957 11. 366441 7. 2194066 3. 7872036 10. 694057 4. 5868931  
8. 0664357 8. 0261192 7. 2268139 5. 2367178 5. 6722201 3. 0022205 7. 7529474 5. 3227481  
7. 7462051 9. 5463903 13. 156081 13. 024044 11. 870871 4. 5880231 9. 995046 5. 5935591  
8. 2612692 10. 635041 10. 343452 11. 437267 7. 9152187 5. 1919503 12. 901849 5. 2336901  
6. 3706458 11. 313556 7. 774165 11. 419573 10. 811286 6. 7072967 13. 306106 4. 1346293  
7. 0450079 10. 279654 7. 4165378 9. 1315651 10. 54441 4. 3441954 9. 9751659 4. 0292555  
7. 738222 10. 691055 8. 6809137 6. 7700214 5. 5420242 3. 402011 9. 8701045 6. 2021077  
7. 2400386 11. 15385 8. 6894543 11. 271719 6. 9748434 4. 5790939 12. 148272 4. 8807917  
7. 7892394 12. 572464 11. 384153 11. 395788 10. 380735 5. 011573 12. 275537 6. 1309725  
8. 1430117 5. 3750495 9. 3498802 10. 096496 6. 7085735 3. 7621402 8. 4072371 5. 4691281  
6. 9511994 12. 095117 11. 251087 11. 604575 7. 2521463 5. 7925303 12. 001023 4. 8536782  
6. 8629881 9. 1741289 7. 4294939 11. 320613 10. 933433 8. 9521937 11. 675021 5. 817783  
7. 0665674 8. 485822 8. 5810715 12. 4323 8. 9007683 5. 9342766 9. 0895269 5. 589005  
8. 1164513 10. 672023 8. 1389569 10. 234088 8. 2033502 5. 1785647 12. 355207 4. 7209404  
7. 0223644 10. 951748 8. 8811026 10. 544152 6. 860051 6. 366429 10. 459186 5. 8989934  
8. 0970208 9. 803562 13. 673447 8. 5090193 6. 6495118 3. 6843128 9. 6342797 5. 4970732  
8. 6245052 6. 4245378 12. 996584 9. 3923208 5. 5420242 3. 6918587 9. 1742498 5. 3092644  
8. 5623344 7. 1233387 7. 3940625 8. 4168045 5. 6071502 5. 2279519 7. 3205496 5. 9480446  
8. 1036896 9. 1040327 7. 1380451 10. 107737 6. 3215861 4. 5412958 10. 542996 5. 313294  
7. 4737761 10. 720554 7. 7683388 12. 042206 5. 7214925 5. 717196 13. 404045 5. 8558789

7. 2836681 11. 364747 7. 1449615 10. 549728 5. 6077374 3. 4385938 12. 84985 4. 0558305  
7. 2279766 12. 673472 8. 8474138 11. 229421 7. 1358328 3. 9168911 13. 889333 4. 9426828  
7. 1798095 10. 725545 9. 3889498 12. 460794 14. 907375 3. 7100981 11. 571556 4. 7375326  
8. 3849392 12. 509255 12. 142108 12. 424424 7. 7915819 4. 0309104 12. 84309 5. 053063  
7. 6784901 11. 37427 8. 217339 11. 323956 9. 2475916 5. 6184482 10. 789082 5. 2029734  
7. 2737055 10. 703946 9. 1897192 11. 737604 6. 3320208 6. 0385317 12. 665347 5. 1602797  
6. 6773306 9. 195247 6. 098734 9. 8063454 5. 6357914 6. 9889606 12. 299431 4. 1586023  
8. 416852 8. 9000521 12. 968957 9. 5704521 8. 3746322 4. 6825834 9. 7289443 6. 4791681  
8. 0032924 11. 01148 9. 0177183 10. 575524 7. 5126924 3. 4892033 11. 458401 4. 4033983  
7. 6750227 12. 473962 8. 3630904 11. 325392 6. 7739185 4. 8030543 12. 506837 5. 5236894  
9. 9556829 5. 8416731 10. 661283 4. 9598815 6. 0389471 4. 6539875 6. 7685814 7. 1655117  
6. 9608537 11. 121437 7. 42546 11. 471583 5. 5934292 3. 9753123 12. 035229 4. 3767422  
7. 4606649 11. 285143 10. 699405 9. 5107342 5. 5420242 5. 1865707 12. 339048 5. 8965714  
7. 5212795 11. 643093 8. 8026898 11. 883059 7. 2512101 5. 0415871 12. 309179 5. 8951905  
8. 0420799 12. 461986 8. 2086183 11. 27133 7. 0679118 4. 2209716 12. 612282 4. 7840765  
8. 2965219 9. 4818235 9. 22478 10. 754158 6. 7446983 5. 6253205 10. 541932 5. 2773986  
7. 8316434 10. 241361 7. 4024474 8. 0558057 7. 9350342 5. 9637061 12. 397043 4. 9319445  
7. 0655915 11. 934144 9. 5859298 11. 927695 13. 835145 7. 099693 13. 403825 5. 0702365  
7. 4725653 12. 005758 9. 3034589 11. 785412 12. 954818 5. 6836029 13. 764664 4. 83127  
7. 8768817 11. 784059 7. 5446587 10. 94659 6. 4852183 6. 0233008 10. 786932 5. 878573  
7. 6324688 11. 704037 8. 029008 11. 160884 11. 351288 4. 726849 11. 667794 5. 927274  
8. 6912321 10. 841485 13. 248269 12. 040324 8. 1199965 4. 6254487 12. 053657 6. 2667195  
7. 6386482 12. 100174 11. 883286 12. 36023 8. 099401 4. 696395 14. 150447 5. 6743723  
7. 9839122 10. 785878 10. 881644 10. 368512 5. 9347954 4. 6400726 10. 961487 4. 8273331  
9. 008979 8. 8597201 8. 2052279 7. 304424 5. 9534849 3. 6322009 9. 9011805 5. 4684808  
8. 6566988 9. 1887182 11. 304466 10. 832208 9. 3185097 4. 315293 10. 173952 4. 9444999  
7. 5792591 10. 860117 8. 0850312 7. 2068604 5. 8779715 4. 9991901 11. 290391 5. 8482824  
7. 5152369 10. 081837 13. 576479 8. 9004469 7. 0372056 3. 2196799 12. 234808 5. 3623585  
8. 0407669 11. 483675 9. 3116504 10. 114702 6. 6127289 3. 3625689 13. 845276 4. 6047768  
7. 7078781 11. 77097 7. 964534 10. 848706 6. 8503484 5. 0950489 13. 795149 4. 8744456  
7. 2516668 10. 348806 9. 6287911 9. 7123607 6. 0838641 4. 6417797 11. 388391 5. 2080408  
8. 0279999 11. 564967 9. 8747622 11. 770669 9. 8024169 3. 8035004 12. 481085 4. 8396078  
7. 0866708 10. 644275 10. 612386 11. 592458 13. 640392 5. 6599771 12. 134278 5. 4472036  
6. 8774778 12. 088518 7. 278081 11. 404242 8. 8079433 5. 5716427 12. 924982 5. 0314027  
6. 4666348 13. 279828 8. 2136899 12. 34703 8. 1554778 7. 9581413 4. 6653765 4. 6121546  
7. 137903 12. 316651 10. 628503 11. 374433 7. 4899729 5. 830481 12. 326171 4. 6758554  
8. 0272708 6. 4411657 10. 705761 11. 624347 5. 7941606 4. 2636742 6. 7242231 4. 6226855  
7. 9621284 9. 3337506 8. 9289568 10. 164483 12. 426428 5. 7101762 12. 538095 5. 4768561  
8. 7055813 8. 8838444 12. 914212 9. 7754195 8. 6426016 4. 74718 9. 6198632 5. 4542015  
7. 3444338 9. 4994238 14. 43136 10. 746067 7. 9678348 4. 1593424 9. 8381136 4. 4397911  
6. 7332371 8. 4985337 6. 9068529 10. 338896 5. 5894792 7. 997124 10. 542083 5. 8662042  
7. 8764294 11. 567329 12. 886057 11. 806542 5. 6720905 5. 6296684 12. 569134 4. 763411  
8. 8569683 6. 9806645 8. 8593595 8. 0467496 5. 5420242 3. 4787986 6. 4797465 6. 3945727  
6. 8535582 12. 369138 12. 092863 12. 183311 5. 5966394 4. 5350556 10. 724278 4. 9669531  
6. 5245601 11. 710117 8. 4711666 9. 4816037 7. 1536264 6. 5578351 12. 9657 4. 7141823  
7. 905109 5. 1826085 9. 6494315 9. 168716 7. 1612361 4. 1085898 7. 7863201 5. 2954027  
7. 3737117 10. 131625 8. 2885127 11. 277282 13. 838746 7. 0522086 12. 332804 5. 4221848  
7. 6807567 10. 740927 10. 066624 11. 538055 8. 1675648 4. 4180429 10. 710024 5. 0544829  
8. 4769854 12. 325018 8. 9022873 11. 652018 6. 4297777 6. 2002825 13. 328057 5. 6185552  
7. 0031621 10. 816737 9. 2034903 11. 465567 5. 7347466 4. 911026 9. 318105 5. 2037239  
7. 3306322 10. 778544 11. 34279 11. 861773 12. 313901 5. 9226474 11. 598959 5. 7274507

6.9249399 11.412153 8.3367101 11.568916 7.5010438 6.2343233 12.989622 5.336638  
8.4461745 9.8999396 9.5030011 10.35712 8.9100276 6.1248645 11.326765 6.4596201  
9.4435737 7.0027328 6.9689684 7.6676838 7.3677037 3.9887697 9.2499367 5.8202527  
7.6326509 10.174056 10.71839 10.415315 10.712309 3.9675927 11.711174 4.2546713  
8.81833 8.1484674 9.6681237 12.496215 10.060027 5.8885219 11.423614 5.7568707  
7.8393804 4.5983293 10.427159 3.764366 5.5818237 2.8815564 5.6149136 4.7204653  
7.6181901 7.8935675 7.9607129 7.1351079 7.121603 3.6432018 8.6968241 4.9312432  
7.6164205 8.6311292 9.7046544 9.5886824 10.037844 5.4297733 10.420756 4.6880461  
7.0183891 11.262157 9.5599 3.9770047 6.1306116 4.4718563 9.105513 6.0068928  
7.4189351 9.683706 6.3606959 6.9113817 6.1997486 7.2366089 9.5608129 4.6334508  
7.8545837 13.577263 13.201399 13.683253 12.259208 5.7398359 14.345631 4.8123795  
7.8222389 11.522676 13.259435 10.586709 7.8107322 5.2288753 12.332943 5.1925515  
6.7045889 12.281673 9.574248 12.420997 12.140844 5.588436 12.66594 5.1480236  
7.7884442 9.8482697 9.6878474 11.428311 7.7203409 4.3243929 11.794378 5.7381317  
7.3828021 12.031675 12.371245 12.625064 9.3038706 4.793095 13.722131 4.8131353  
7.9448811 9.8787618 7.8817359 11.149978 8.5732965 4.6308873 12.32522 4.7039411  
7.7363772 11.932598 10.396649 11.256603 13.474774 5.8081535 13.750165 4.0939086  
7.1649668 12.65477 7.4131076 11.21594 6.7005011 6.9263273 13.282365 4.9792163

XYLT2

7. 707767  
8. 8927602  
7. 7549333  
7. 742587  
7. 7799835  
7. 5029044  
6. 9208506  
9. 8971872  
7. 7114206  
7. 3955923  
7. 8807729  
7. 9135893  
7. 6804252  
8. 4904585  
8. 3097237  
8. 3955536  
8. 1820606  
6. 7310921  
7. 858089  
7. 2103096  
7. 8215145  
6. 8505878  
6. 6180094  
7. 5276968  
7. 4883071  
6. 2771584  
6. 732157  
6. 8060027  
8. 5549396  
8. 3840121  
6. 6519349  
8. 037511  
8. 4640742  
7. 5648845  
8. 0491943  
7. 9280725  
7. 3311222  
7. 4363797  
8. 0922813  
7. 5107642  
8. 1933744  
7. 567195  
10. 404708  
8. 82275  
7. 7070255  
8. 2773839  
7. 9406645  
8. 5795007  
9. 2361349  
8. 4174849

8.2799936  
8.8279196  
8.1617045  
8.652098  
7.1277435  
8.389517  
8.375367  
8.7989995  
7.7080819  
7.6555979  
8.087409  
8.9171454  
7.6261346  
8.3223376  
6.7296723  
8.7361078  
7.7043521  
7.3208839  
7.9371854  
8.0151556  
8.6551413  
8.1092226  
8.1396189  
8.2760392  
7.2005999  
8.6649766  
7.0238604  
8.8509883  
8.0366444  
7.876468  
6.6806185  
6.9841714  
8.1208848  
7.0268831  
7.3780117  
6.7149116  
6.7575912  
7.8171591  
8.3470851  
8.303155  
7.6350236  
8.02314  
8.2673793  
8.4149267  
7.2628479  
8.6069814  
6.779228  
8.7846457  
8.2356794  
8.0995925  
8.1752826



7. 8628261  
8. 4049299  
7. 6575344  
7. 851991  
7. 2998119  
7. 8747333  
9. 5190272  
7. 6319349  
7. 8926134  
7. 8368329  
7. 0003759  
9. 1202801  
8. 174889  
7. 6021159  
7. 2823676  
7. 3727025  
8. 8081863  
7. 3207617  
8. 4646712  
7. 2630519  
9. 1986354  
7. 5879518  
8. 9015548  
7. 7651704  
9. 0416358  
7. 2135181  
7. 7149992  
8. 2459426  
7. 5420907  
7. 8720788  
8. 2962334  
8. 8284446  
7. 5834287  
8. 1378476  
8. 5684714  
8. 6100879  
6. 9212373  
8. 9843301  
8. 297159  
7. 8013676  
8. 0779616  
8. 692981  
6. 9830911  
6. 4108372  
7. 219533  
7. 6126034  
7. 4742665  
6. 8615048  
8. 1149491  
8. 2044432  
9. 14711

8. 7140947  
7. 4317728  
7. 8830378  
6. 9371369  
6. 3532153  
7. 2568733  
8. 0537834  
7. 1854091  
8. 7144101  
8. 6080876  
6. 513965  
8. 2320827  
8. 4421212  
8. 6483202  
7. 2121627  
7. 617561  
7. 3016738  
7. 9306489  
7. 9536865  
7. 781665  
7. 778938  
7. 8419359  
8. 7597782  
8. 296547  
8. 9819949  
7. 6354461  
8. 1532821  
7. 7556892  
9. 2232217  
8. 5522749  
7. 9692536  
8. 1017304  
7. 5420957  
8. 6035253  
7. 5445633  
6. 9867458  
7. 0192297  
7. 8227586  
6. 8446687  
8. 2704739  
8. 8952944  
7. 9130498  
8. 8912286  
7. 8544178  
7. 9939629  
7. 272175  
7. 4357463  
8. 7057518  
8. 7020616  
7. 4427102  
8. 2028235

6. 8799897  
7. 4226023  
6. 7082093  
8. 6664919  
7. 426146  
8. 2580095  
7. 5898742  
9. 5967036  
7. 2756242  
7. 1601038  
8. 8115728  
6. 5750931  
8. 2160989  
8. 1851503  
8. 479053  
7. 9035791  
8. 3611331  
8. 3656169  
7. 590278  
7. 8654185  
7. 7765742  
8. 5482353  
7. 9367244  
7. 0841745  
7. 8121289  
8. 2874409  
7. 5691291  
8. 3093453  
7. 4045607  
7. 8158406  
7. 1979048  
7. 4882099  
9. 1202939  
7. 2935646  
7. 6197332  
7. 6374304  
8. 17407  
7. 6096321  
7. 3290996  
6. 2783207  
8. 5972223  
7. 4655922  
9. 3535292  
8. 0078297  
7. 8783996  
8. 6215693  
7. 9687761  
7. 8804752  
8. 0272444  
7. 9553134  
8. 4250028

7. 3418244  
9. 8071797  
8. 9147762  
6. 7322542  
8. 585745  
5. 8207783  
7. 8076079  
8. 02631  
8. 2112553  
7. 3539832  
7. 7721189  
8. 0609024  
7. 949667  
7. 2029493  
8. 9874442  
7. 7290011  
7. 3260189  
7. 9214867
