# Supplementary figures and images for: The Landscape of Using Glycosyltransferase Gene Signatures for Overall Survival Prediction in Hepatocellular Carcinoma
Source: Hindawi journal article supplement (doi:10.1155/2022/5989419), 2022-06-21

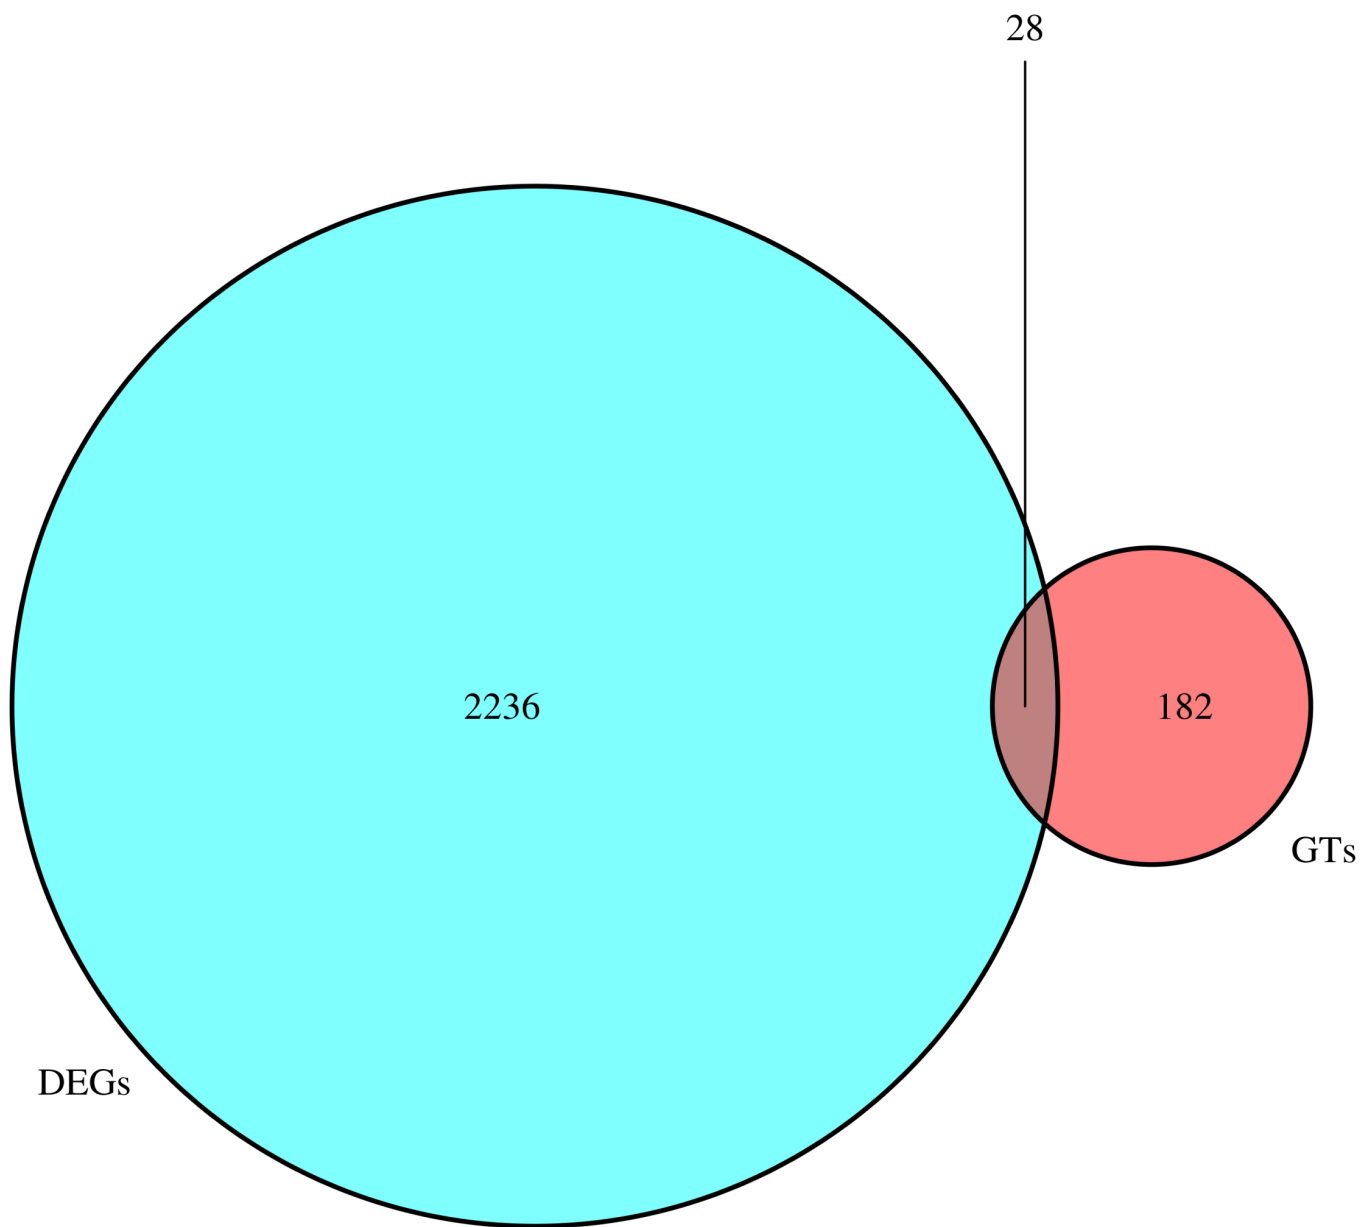

Supplement: f1 [file 5989419.f1.zip]

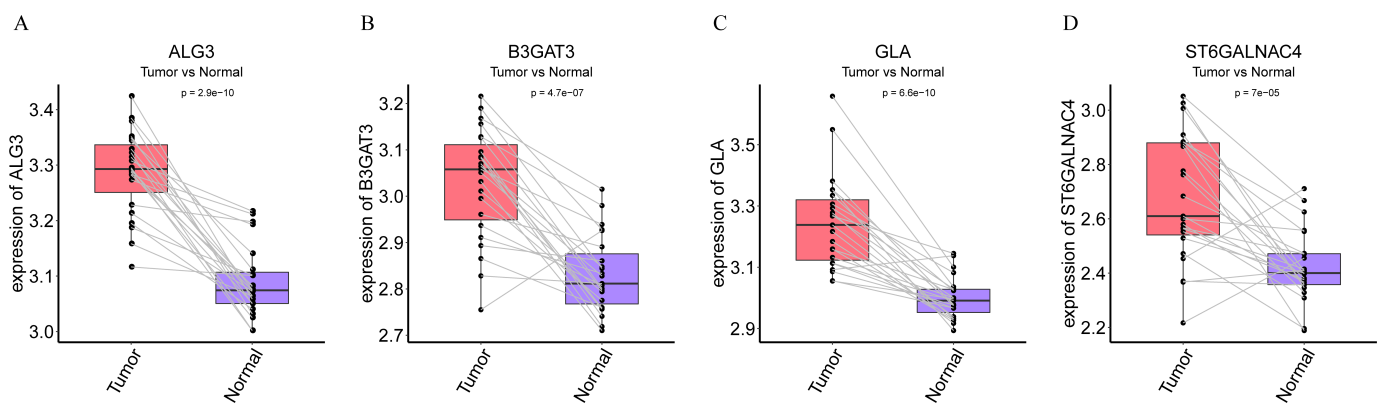

Supplement: f1 [file 5989419.f1.zip]

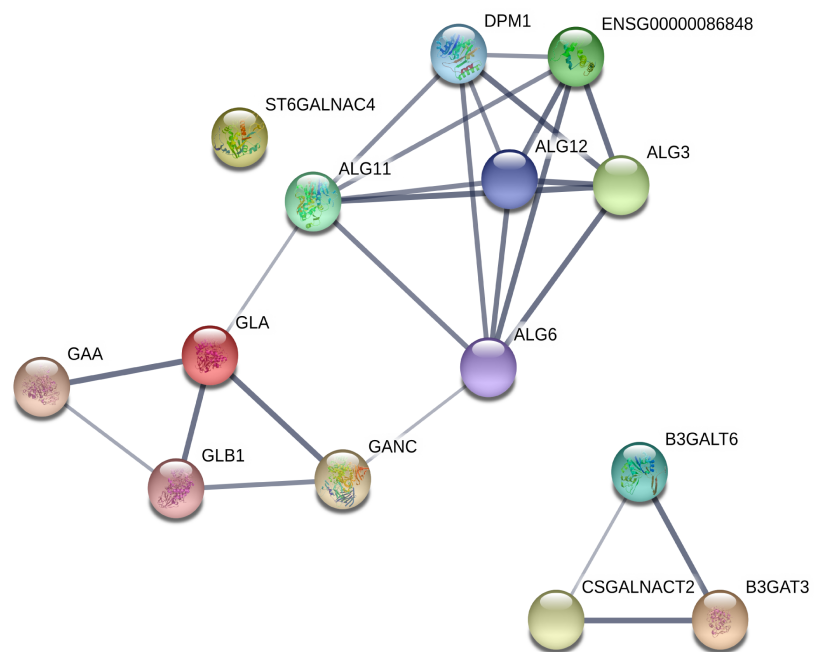

Supplement: f1 [file 5989419.f1.zip]

A

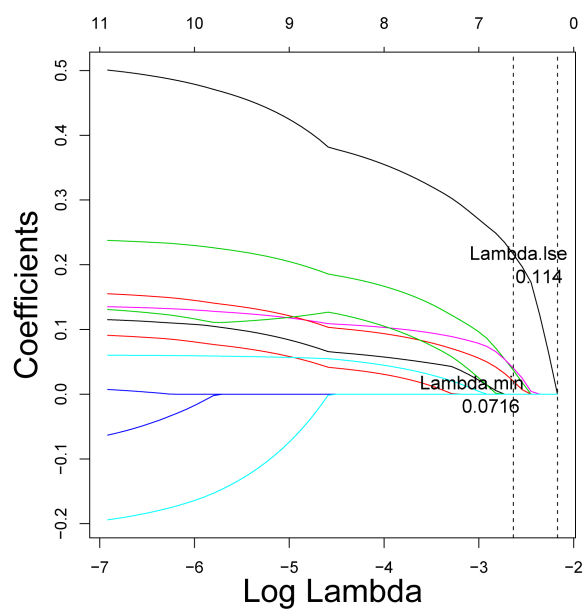

B

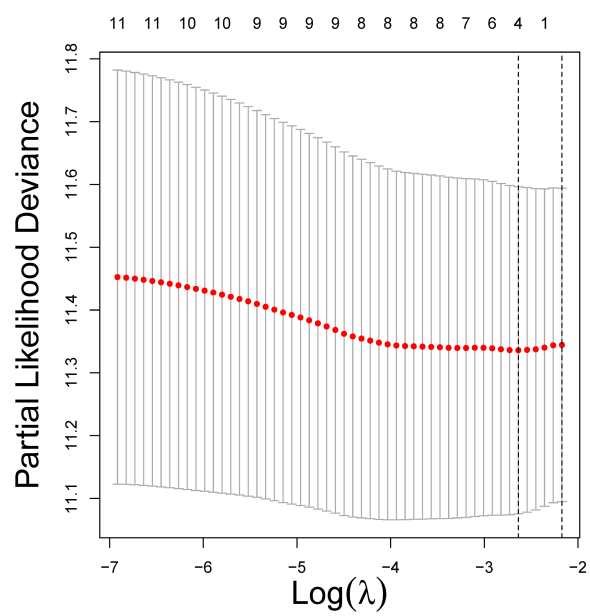

Supplement: f1 [file 5989419.f1.zip]

A

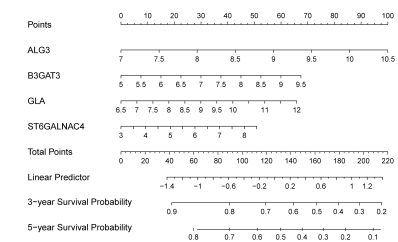

B

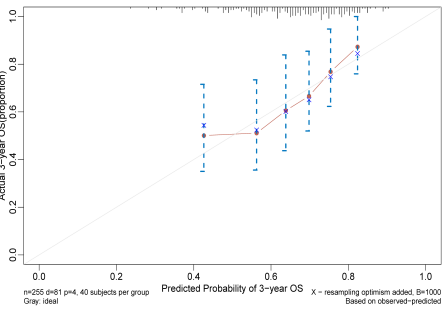

C

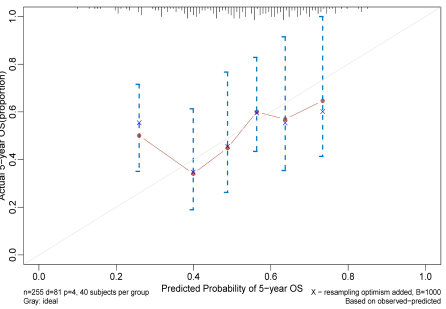

Supplement: f1 [file 5989419.f1.zip]

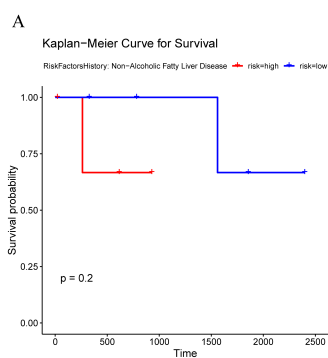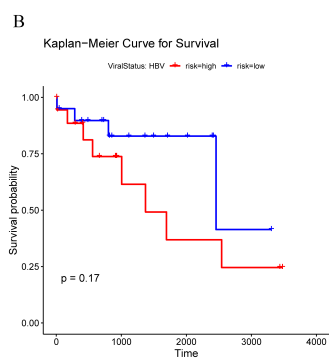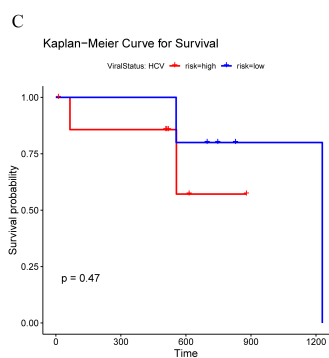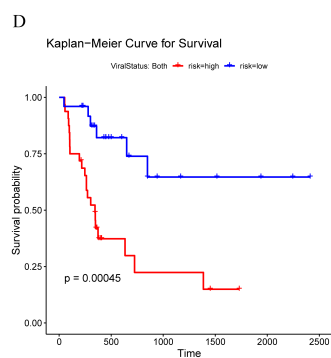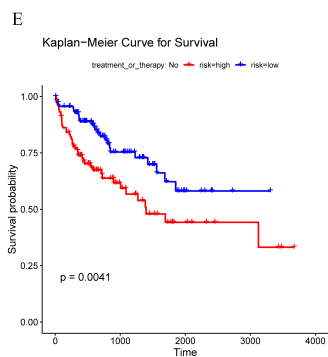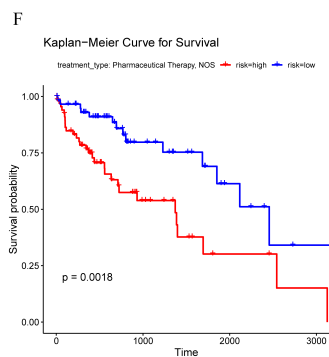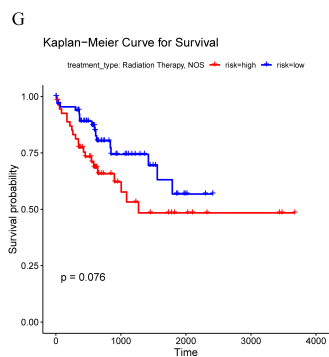

Supplement: f1 [file 5989419.f1.zip]
